# Supplementary material for: Linking pangenomes and metagenomes: the Prochlorococcus metapangenome
Source: PeerJ. 2018 Jan 25;6:e4320. doi: 10.7717/peerj.4320 (PMC5804319; doi:10.7717/peerj.4320)
Supplement: Table S2 — Reads recruitments, detection and relative distribution of 31 Prochlorococcus genomes in 93 metagenomes from the TARA Oceans project. [file peerj-06-4320-s005.xlsx]

## Sheet: Distributions
Supplementary Table 2
	Number of recruited reads	Depth_Id	Location	AS9601	SS120	EQPAC1	GP2	LG	MED4	MIT9107	MIT9116	MIT9123	MIT9201	MIT9202	MIT9211	MIT9215	MIT9301	MIT9302	MIT9303	MIT9311	MIT9312	MIT9313	MIT9314	MIT9321	MIT9322	MIT9401	MIT9515	NATL1A	NATL2A	PAC1	SB	SS2	SS35	SS51
	ANE_004_05M	SRF	ANE	45909.4	792.136	1.49315e+07	36708	3384.99	1.48959e+07	24267.5	25818.7	28023.8	46053.9	30036.2	2379.55	37780.1	61516.4	168520	12351.3	85234.9	63236.2	9468.43	91966.5	14256.6	14147.8	15160.1	564072	555035	522155	463919	61522.3	889.411	773.264	811.54
	ANE_004_40M	DCM	ANE	20376.4	1799.01	4.03075e+06	18910.4	5965.95	4.01846e+06	14785.6	14158.4	14299.9	23155.4	14714.7	3054.52	16575.7	22641.3	98692.7	22643.7	50298.7	35399.9	12612.9	39466.8	6902.35	7687.11	7648.2	196957	5.29019e+06	5.00145e+06	4.39275e+06	23759.9	3013.45	1942.63	1806.27
	ANE_150_05M	SRF	ANE	258760	1048.16	8.12627e+06	164360	4145.29	8.09777e+06	63863.6	61660.2	64075.7	144754	111198	2789.5	113021	231687	435859	15674.5	188677	171133	11339.1	312842	57521.5	61150.7	59951.2	494822	1.09373e+06	1.03887e+06	905265	262655	1118.29	909.029	1037.71
	ANE_150_40M	DCM	ANE	348367	878.626	6.65451e+06	212595	3320.4	6.60396e+06	78784.9	75176.4	78868.4	178066	137588	2356.15	139216	302983	543797	11727.1	239579	218154	9413.74	406313	72304.7	77889.8	74566.9	405151	964775	914334	798428	350143	796.985	677.743	811.513
	ANE_151_05M	SRF	ANE	57308.6	570.708	6.64586e+06	44189	2961.89	6.62259e+06	21596.7	22089.6	22237.2	43954.4	31397.5	1398.66	33845.2	59942.1	119288	7536.75	70123.2	49903.8	6366.74	88689.3	15256.2	16196	16530.4	334051	232650	219137	194906	65344.2	499.854	479.556	575.296
	ANE_151_80M	DCM	ANE	10859.4	1440.61	1.60426e+06	9285.36	3864.93	1.59471e+06	5672.97	6058.46	5151.54	10272.5	6689.35	2709.56	7458.11	12431.3	26817.4	67220.6	15740.6	11221	24535.5	18263	3387.51	3705.1	3635.22	90954.4	372252	350830	309269	13305.6	1320.35	1310.38	1522.48
	ANE_152_05M	SRF	ANE	10562.9	942.07	4.32363e+06	8134.58	3840.04	4.3002e+06	7828.68	8912.57	8600.92	13455.5	9229.84	3423.77	12014.8	12867.3	32209.7	18727.3	17337.3	11332.7	13524.2	19487.3	3975.08	4221	4152.61	273167	714597	676437	644458	13594.6	976.375	883.075	1118.23
	ANW_141_05M	SRF	ANW	1.10255e+06	2795.16	22376.6	376636	7539.64	16470.6	43485.4	41398.3	41161.2	223027	233733	15420	227812	802774	257852	93309	132873	126896	73940.3	1.09763e+06	148201	153910	153614	2444.49	3671.68	2817.93	3349.75	1.09616e+06	3032.02	2844.8	3183.84
	ANW_142_05M	SRF	ANW	3.35699e+06	988.807	60666	1.2126e+06	3762.37	49014.2	138485	132323	136427	731540	761279	3482.36	745526	2.58798e+06	875789	23228.5	442009	418313	19858.3	3.40052e+06	469022	486465	488127	10117.4	9231.73	8159.29	8581.94	3.26427e+06	924.4	824.208	1009.49
	ANW_145_05M	SRF	ANW	5638.95	694.194	2446.06	2382.77	3822.3	657.375	1530.19	1478.32	395.289	2771.65	1491.84	2161.64	1357.37	4497.63	1993.85	12773.8	2332.93	1016.5	10052	6619.92	944.859	1173.84	1149.26	273.718	2847.43	2326.98	4034.76	6712.94	641.938	670.657	686.375
	ANW_146_05M	SRF	ANW	473802	769.36	17254.8	186864	3965.3	14191.7	31881.2	29851.2	29075.1	120360	116849	2290.65	115618	382520	200026	13570.6	97653.6	94083.3	11651.8	477244	70600.6	73078.8	73008.2	4861.59	255885	237733	192149	448801	784.499	694.282	838.661
	ANW_148_05M	SRF	ANW	1.01335e+06	1121.06	43839.2	391888	4675.2	38136.3	63896.2	59375.2	61200.4	251275	243820	4495.05	240407	794910	388613	28480.7	189689	182281	23777.5	1.0268e+06	149818	156308	154842	7811.32	189566	180062	145136	980773	1143.66	1117.59	1210.08
	ANW_149_05M	SRF	ANW	160456	891.985	246973	87622.6	4765.74	242346	29587.1	27310	27437.8	70728.8	56596.2	3398.91	56607.5	140612	194835	19465.9	88803	84721.5	16597.1	169285	31135.9	33778	32620	37240.1	218926	203240	166004	153017	1013.45	933.675	998.046
	ASE_66_05M	SRF	ASE	7530.1	272.821	436174	4621.82	2037.68	434732	2675.17	2639.76	2068.19	5505.5	3500.54	618.888	3776.18	6094.43	9839.48	3200.95	6790.47	4688.89	2826.75	8401.84	1788.06	2113.84	1848.44	44666.6	203756	193441	167587	8032.92	298.033	251.297	283.972
	ASE_66_30M	DCM	ASE	4715.25	228.897	324018	2848.31	1239.86	324579	1681.36	1786.54	1352.84	3408.95	2267.74	521.211	2311.46	3790.57	6389.97	2889.01	4186.15	2947.53	2464.43	5145.15	1238.12	1228.68	1153.61	33393	146141	137423	121854	4551.22	203.851	208.133	230.549
	ASE_67_05M	SRF	ASE	88.098	254.363	1012.37	175.991	1632.32	238.266	582.711	584.661	66.2335	737.184	83.4523	804.361	71.3254	132.29	124.293	5192.47	704.576	112.379	4371.62	727.919	115.972	185.429	133.929	116.894	721.468	613.481	1201.09	708.404	263.715	288.084	298.507
	ASE_68_05M	SRF	ASE	19046.6	1633.63	7.36471e+06	13426.2	5110.73	7.34222e+06	11323.5	11811.9	12821.3	21789.1	15718	5196.92	18418.3	13233.8	47915.7	27541.2	18527.4	13775.3	20429.7	22068.5	6038.44	6392.4	6455.89	350175	2.75485e+06	2.62933e+06	2.26991e+06	21078	1672.79	1355.86	1786.64
	ASE_68_50M	DCM	ASE	15952.4	1402.86	6.56188e+06	11217.7	3531.21	6.55615e+06	9130.12	10522.5	10847.6	17501.9	13149.3	4056.82	15796.4	11049.2	40127.6	20504.1	16020.4	11475.1	15188.2	16929.6	5101.77	5262.42	5374.5	305382	3.03911e+06	2.90308e+06	2.50835e+06	17148.8	1370.59	1040.55	1417.34
	ASE_70_05M	SRF	ASE	67085.7	931.684	479160	41925.1	1869.97	471745	44375.9	41830.5	42646.2	59377.7	70489.2	1701.38	69495.8	56389.7	69376	5581.13	41128.2	37275	4668.71	66060.2	17555.7	19130.5	18256.1	162464	1.93612e+06	1.88315e+06	1.6676e+06	62062.1	668.027	596.54	1061.81
	ASW_72_05M	SRF	ASW	5.16929e+06	562.266	78008.7	2.42903e+06	2076.55	50585.1	436970	415796	428403	2.06405e+06	1.68357e+06	1130.49	1.65718e+06	4.02515e+06	2.16941e+06	3115.92	1.1713e+06	1.09415e+06	3128.72	4.93246e+06	919968	965820	956354	59921.5	40003.4	38277.4	51764.1	5.12562e+06	527.989	500.712	548.793
	ASW_72_100M	DCM	ASW	245301	4885.14	20113.1	132582	5543.39	14464.1	63857.7	59268.2	61382.2	121668	100686	9195.97	98982.5	196515	167582	2460.34	99137.3	84583	2785.5	239387	48820.2	51491.3	50504.5	19556.9	1.52626e+06	1.50642e+06	1.52431e+06	243084	3336.17	3734.32	5054.59
	ASW_76_05M	SRF	ASW	3.56674e+06	713.631	124505	1.86427e+06	3484.51	109283	335722	316970	323429	1.37336e+06	1.14924e+06	1707.52	1.11906e+06	2.99874e+06	1.73658e+06	6974.66	919112	879006	6429.19	3.56279e+06	622360	658419	650486	113399	4280.79	3312.65	7911.81	3.65581e+06	742.149	619.164	706.097
	ASW_78_05M	SRF	ASW	4.89283e+06	1171.12	3.96759e+06	2.655e+06	3883.86	3.96276e+06	621597	581256	595247	1.99335e+06	1.63371e+06	3813.8	1.59e+06	4.42826e+06	3.58325e+06	16581.2	1.81189e+06	1.74662e+06	13107	5.05054e+06	882317	936739	918940	715174	264908	239961	205352	4.80886e+06	1197.23	1061.55	1167.02
	ASW_82_05M	SRF	ASW	877.846	778.85	2862.22	690.043	4717.56	408.571	2019.47	2036.74	270.418	3004.16	555.349	648.034	508.754	1166.26	766.973	5861.24	2417.37	485.511	6011.36	3019.24	402.895	707.888	519.106	301.332	1876.81	1417.25	2510.82	3045.55	812.514	629.674	583.325
	ASW_82_40M	DCM	ASW	529.944	896.416	3943.48	522.104	6283.75	493.23	2766.45	2725.57	340.939	3771.77	460.573	857.318	493.34	1249.04	580.81	7479.8	3095.55	437.37	7887.89	3384.12	371.29	853.126	598.974	453.075	2253.85	2026.84	2639.92	3354.28	893.122	758.924	771.708
	ION_36_05M	SRF	ION	91874.6	911.426	2250.05	40293.9	2764.36	655.002	7450.04	7053.77	6933.3	30469.2	28255	4827.51	28574.2	71680.2	33987.6	28094.7	19796.1	17780.2	21843.6	81129.5	16615.3	16951	16673.2	638.361	1291.23	888.015	1093.25	81756	985.356	806.371	929.462
	ION_36_17M	DCM	ION	133234	1618.73	3265.51	58277.1	4928.1	917.788	11072	10793.8	9590.88	43366.1	41250.3	8657.19	41899	104417	48366.4	52349.4	28360.4	25095.9	40913.6	119610	24047.3	24801.4	23666.7	825.501	1977.2	1600.46	1858.56	116379	1699.92	1549.75	1759.04
	ION_38_05M	SRF	ION	2.24301e+06	1224.57	13045.9	978387	3219.82	9995.35	159996	152642	158842	736033	686162	6246.48	694239	1.7425e+06	838462	35425.5	443528	419176	27139.3	1.97116e+06	394006	411528	405199	11493.3	2838.57	2371.1	2716.37	1.95472e+06	1238.55	1104.62	1300.98
	ION_38_25M	DCM	ION	2.57685e+06	2221.99	20292.2	1.17627e+06	5611.96	15816.3	218130	209288	220125	888444	816887	14972.6	830981	2.04854e+06	1.08197e+06	80998.5	593015	561207	64741	2.25911e+06	459164	477727	462208	20122.3	14386.4	13291.2	14358.1	2.23229e+06	2228.81	2199.15	2473.97
	ION_39_25M	DCM	ION	3.56644e+06	1328.9	21828.1	1.58742e+06	3508.46	15822.2	248522	240877	254431	1.12616e+06	967753	7253.36	976002	2.80022e+06	1.38495e+06	41504.3	746130	703043	34191.6	3.21935e+06	583860	610382	583834	15683.8	4784.43	3347.26	5717.31	3.25865e+06	1326.77	1298.59	1354.05
	ION_41_05M	SRF	ION	1.10259e+07	763.359	77721.7	4.38564e+06	2899.86	46873.9	543055	516389	539611	2.92423e+06	2.67204e+06	2253.54	2.61648e+06	8.37638e+06	3.22325e+06	9196.28	1.70405e+06	1.58847e+06	7530.56	9.79827e+06	1.638e+06	1.70472e+06	1.69636e+06	45097.4	4260.41	2032.42	26221.6	1.05241e+07	781.005	702.031	804.917
	ION_41_60M	DCM	ION	705561	3321.59	128294	430221	5582.11	109330	210070	194803	208947	434214	309324	13074	305052	579460	840749	4020.81	478925	439101	5569.63	650686	168663	184980	165936	123538	93550	91363.3	113373	662681	3069.93	2838.39	3712.04
	ION_42_05M	SRF	ION	8.06419e+06	624.851	68283.1	3.12319e+06	2274.89	40155.5	368985	350946	365254	2.01124e+06	1.91354e+06	1258.54	1.86379e+06	5.93519e+06	2.20209e+06	2879.87	1.16703e+06	1.08448e+06	2570.79	7.207e+06	1.16465e+06	1.2108e+06	1.20695e+06	42437.5	3544.17	2511.79	32927.3	7.8672e+06	538.54	520.318	589.041
	ION_42_80M	DCM	ION	1.03747e+06	2676.41	156664	574510	4540.77	130376	241744	227647	241487	558563	406727	17922.7	394291	833753	965020	2741.65	561705	492039	3278.59	966759	222403	242065	220811	147535	72917.3	70482	108861	1.01579e+06	2370.71	2272.54	2697.21
	ION_45_05M	SRF	ION	1.52945e+07	812.22	90163.6	5.94521e+06	2636.17	56388.1	692799	670271	692832	3.88845e+06	3.69231e+06	2144.01	3.62857e+06	1.15525e+07	4.068e+06	5636.89	2.12141e+06	2.00585e+06	4744.55	1.36819e+07	2.23412e+06	2.32978e+06	2.3208e+06	46863	3617.15	2224.2	20016.8	1.50397e+07	782.147	784.486	846.197
	ION_48_05M	SRF	ION	1.75218e+07	760.986	96518.4	6.62534e+06	3005.44	60913.4	750813	729577	751614	4.54376e+06	4.35397e+06	1446.46	4.25927e+06	1.33074e+07	4.29506e+06	2271.55	2.28139e+06	2.15434e+06	2355.75	1.59078e+07	2.51731e+06	2.61724e+06	2.61821e+06	45100.2	2905.32	2166.2	8125.68	1.82191e+07	821.52	727.426	771.924
	IOS_52_05M	SRF	IOS	915686	4819.51	138883	485284	7861.63	109033	198224	183020	182535	613394	641712	12702	620522	717686	784126	6914.22	497786	311102	6088.64	848293	222852	238011	233408	253966	58894.4	56267.8	68653.7	944327	5065.2	4815.07	6080.47
	IOS_52_75M	DCM	IOS	1.33783e+06	4955.48	47504.9	714269	5380.47	35847.4	311783	293568	300803	863607	820587	9016.18	804993	1.08478e+06	941806	5124.87	545287	491983	4851.88	1.27697e+06	280489	299785	287890	63640.1	2.81281e+06	2.81306e+06	2.90244e+06	1.31296e+06	3397.94	3170.34	5259.52
	IOS_56_05M	SRF	IOS	6.93204e+06	1119.93	69307.8	3.0529e+06	3192.45	46093.4	461855	437944	454871	2.20996e+06	1.97423e+06	2164.13	1.94334e+06	5.36069e+06	2.53795e+06	4486.01	1.33518e+06	1.24676e+06	4072.85	6.25388e+06	1.12886e+06	1.18534e+06	1.16442e+06	54774.7	24691.2	21882.4	46753	6.66109e+06	1051.44	984.795	1124.13
	IOS_57_05M	SRF	IOS	4.85936e+06	2392.43	41842	2.12358e+06	6502.56	25805	312832	305530	316463	1.44106e+06	1.28269e+06	11636	1.27103e+06	3.81834e+06	1.79115e+06	65339.6	944783	883494	54221	4.45358e+06	768608	804794	775447	24286.1	20147.1	17099.2	32463.7	4.68598e+06	2551.38	2374.99	2810.92
	IOS_58_66M	DCM	IOS	5.49663e+06	1160.11	53272.9	2.29156e+06	2947.15	32929.8	337597	324510	339264	1.58706e+06	1.40801e+06	3172.38	1.39733e+06	4.12489e+06	1.92655e+06	10083.2	1.02921e+06	960104	8906.69	5.0215e+06	854170	891345	868094	33721.8	215266	211019	249333	5.31335e+06	959.471	970.237	1231.84
	IOS_62_05M	SRF	IOS	4.57013e+06	730.316	45351.2	1.9683e+06	2506.16	26545.2	282782	268210	280115	1.32273e+06	1.16541e+06	2413.06	1.14796e+06	3.47319e+06	1.64138e+06	12356	860867	805087	10329.5	4.07923e+06	711155	739625	734499	26483.6	15762.6	13286.1	27384	4.32149e+06	726.981	653.466	685.759
	IOS_64_05M	SRF	IOS	9.41107e+06	1410.17	112449	4.43701e+06	4386.57	91145	708171	675766	694666	3.04854e+06	2.676e+06	4610.37	2.65562e+06	7.57638e+06	3.99029e+06	22812.5	2.10376e+06	2.01065e+06	19082.4	8.82047e+06	1.5779e+06	1.65479e+06	1.64102e+06	101555	181998	175903	173333	8.99432e+06	1369.77	1242.64	1477.93
	IOS_64_65M	DCM	IOS	2.8447e+06	1656.97	47509.2	1.37733e+06	6124.97	34017.8	233484	221335	228820	940896	819593	6656.5	820789	2.31213e+06	1.28847e+06	36313.6	689165	641699	31799.3	2.70741e+06	491683	516406	504202	38994.1	128762	123577	125764	2.71159e+06	1677.21	1545.11	1732.7
	IOS_65_05M	SRF	IOS	645663	530.855	10992.6	291839	2188.49	6446.45	46721.7	43873.7	44846.3	196470	173834	2075.44	172376	501306	261081	11540.7	141813	132318	10028.5	588177	104280	109958	108899	6782.54	23894.7	22309.6	23215.3	606167	516.46	481.767	538.765
	IOS_65_30M	DCM	IOS	563417	1852.76	12710.9	266843	7407.2	6516.45	46046.2	44030.2	44419.3	187744	162715	7760.58	161965	446662	236981	73538	130723	117339	60067.1	528761	100316	105473	102224	7470.2	27381	26052.2	26916.8	537278	1989.32	1834.93	2044.12
	MED_18_05M	SRF	MED	45458.6	1229.31	1.60617e+07	25879.9	3777.53	1.60781e+07	18254.6	19654	20069.5	37910.3	20591.1	1771.31	30350.9	45172	126743	22054.1	50497.7	35973.2	8555.08	102209	11876.1	11814.7	12561.5	595452	1.10615e+06	1.05661e+06	902290	48752.1	1409.93	1153.41	1375.64
	MED_18_60M	DCM	MED	48472.7	711.152	1.80093e+07	26260.6	2924.23	1.80066e+07	19340.1	19119.5	21612	39246.4	21915.8	1153.93	32671.8	48227.1	138936	3630.94	53080.3	37396.8	3013.37	110326	12561.6	12155.5	13143.3	621039	1.25883e+06	1.19928e+06	1.02307e+06	51434.5	876.298	653.576	615.123
	MED_23_05M	SRF	MED	1747.13	262.058	573384	769.902	1983.12	565419	1065.48	1129.95	618.278	1909.52	667.994	719.159	1124.79	1230.92	4087	5217.04	1951.74	1251.51	4117.72	5410.87	467.687	565.08	540.377	10057.4	129857	126826	107563	2131.03	306.978	277.28	247.068
	MED_25_05M	SRF	MED	6843.61	1539.74	2.64919e+06	2890.87	5765.09	2.6683e+06	2947.9	3517.38	2439.94	5715.24	2759.44	6574.36	4306.8	5567.34	18531.2	44905.2	6214.27	4664.77	33601.3	20864	1782.78	1732.37	1997.1	43201.3	905359	879154	735001	7214.7	1563.85	1414.33	1670.15
	MED_25_50M	DCM	MED	15741.4	8253.6	5.829e+06	6097.68	10309.5	5.853e+06	5391.45	6173.28	5791.7	9617.32	6223.37	11261.1	9458.58	16484.8	53811.3	327378	18719.4	11153.7	103995	69827.6	3484.06	3362.37	4073.45	99347.5	1.19068e+07	1.15055e+07	9.66374e+06	12601.4	8170.28	6243.7	8440.05
	MED_30_05M	SRF	MED	7729.12	374.89	1.69963e+06	2994.4	2945.77	1.71412e+06	2083.6	2306.72	1740.45	4831.39	2028.8	879.253	2827.8	5395.47	12404.3	6470.93	5111.49	3202.65	5140.15	15941.2	1412.87	1644.88	1494.62	22656.6	51040.6	59746	48970.1	9123.39	369.876	389.977	454.446
	MED_30_70M	DCM	MED	26283.7	569.394	8.76635e+06	9529.9	2750.19	8.81935e+06	6550.1	7279.45	6773.84	14564.1	8360.6	2323.5	12824.3	19764.9	58350.6	14044.4	20598.5	17824.9	9822.64	69870.8	5151.79	4652.36	5423.1	120700	646243	647679	535209	29714.3	606.672	637.697	739.186
	PON_132_05M	SRF	PON	7.75537e+06	522.063	358876	3.57025e+06	2425.53	335576	525277	496145	514465	2.3463e+06	2.20994e+06	928.444	2.12247e+06	6.73723e+06	2.79648e+06	2143.45	1.40997e+06	1.33761e+06	2202.71	8.01543e+06	1.20696e+06	1.26758e+06	1.26196e+06	113988	2628.98	1477.78	8197.46	8.30856e+06	567.502	473.991	569.066
	PON_133_05M	SRF	PON	24899	906.193	1.01875e+07	19748.1	3912.42	1.01241e+07	16316.4	17217.6	21899.2	38982.8	22938.1	3373.26	27223.7	19770.6	46684.7	15584	33736.6	21668.3	12027.7	33593	10989.5	9992.23	10481.6	973725	295193	279742	292512	24875.6	810.91	762.086	977.518
	PON_133_45M	DCM	PON	2725.84	1118.74	589678	2408.83	3063.45	578690	3010.12	3069.43	2527.78	5041.16	2894.83	2683.47	3103.25	1822.85	6803.75	11017.6	21325.1	2330.83	8355.93	9602.25	1140.06	1387.27	1313.48	77988.4	1.70092e+06	1.62269e+06	1.62803e+06	2842.21	1068.54	854.424	1254.08
	PON_137_05M	SRF	PON	566757	2084.07	53189.1	328896	4875.7	37617.9	173964	158271	160993	406714	479023	6193.38	457371	557729	480466	11864.4	294391	218619	9550.05	526515	144123	154647	149091	80307.1	23332.6	22245.4	44496	525352	2165.12	2012.36	2361.84
	PON_137_40M	DCM	PON	576.769	616.052	1644.73	433.91	3623.21	235.66	1404.43	1363.44	344.421	1730.34	478.42	1741.42	483.646	581.55	496.966	240719	1463.17	344.797	169603	1730.47	267.863	508.978	345.706	220.484	1388.14	1460.95	1487.99	1699.61	605.131	628.659	760.455
	PON_138_05M	SRF	PON	5.71158e+06	872.158	67412	2.76716e+06	2985.11	48705.9	628581	592022	608232	3.49995e+06	3.38741e+06	2088.04	3.2712e+06	4.58878e+06	2.83432e+06	2729.6	1.54223e+06	1.43735e+06	2797.08	5.46657e+06	1.12917e+06	1.19148e+06	1.16667e+06	64501.8	9759.79	8446.83	33012.9	5.59025e+06	866.215	820.18	949.084
	PON_138_60M	DCM	PON	26014.8	7105.45	28306.9	24353.6	8371.46	22234.1	31522.5	29352	30037.3	30041.8	22877.3	12789.9	22020.3	22704.2	85789.3	10778.2	53590.2	38450.3	6935.77	27711.7	9972.83	11341.8	10084.7	28521.7	2.11813e+06	2.09682e+06	2.11852e+06	27381.9	5907.18	5597.38	7427.51
	PON_140_05M	SRF	PON	3.21424e+06	1518.27	20327.9	1.38224e+06	4790.17	12823.9	199574	187452	196315	917936	854099	6621.96	843020	2.58662e+06	1.12567e+06	37875.1	599285	563513	30689.6	2.7959e+06	509934	533571	524860	11868.8	4676.88	2130.12	5129.21	2.86947e+06	1484.87	1439.87	1600.56
	PSE_100_05M	SRF	PSE	36333.2	1857.11	55003	32161	4353.47	37256.2	31742.9	28817.6	27973.2	57581.3	51389.6	4729.9	42470.9	30362.3	129837	2842.75	106972	24440.2	2890.02	32411.1	24461.1	26430.6	27037.3	96742.4	33225	31706.5	58813.4	41983.2	1903.12	1821.42	2326.99
	PSE_100_50M	DCM	PSE	8436.1	3660.01	169790	9541.27	4654.03	156371	12664	11185.1	11478.6	13873.9	9745.15	5162.56	10887.5	7466.32	25754.1	7904.12	25404.7	10796.4	5573.65	12837.4	4787.84	5427.95	5213.83	170146	6.15038e+06	5.98869e+06	5.62611e+06	9067.34	2705.98	1994.29	3748.36
	PSE_102_05M	SRF	PSE	133170	1201.9	99653.2	91298.3	3467.78	85691.5	66394.3	60023.1	61980.3	117160	124263	4696.53	116552	108269	191089	13768.6	124301	85098.5	10870.2	125446	42216.2	46451	44640.4	122716	36692.3	35528.8	50032.9	123837	1350.84	1372.5	1450.58
	PSE_102_40M	DCM	PSE	75763.5	2252.25	220634	57818.8	4219.81	206284	46243.4	42101.9	44023.1	74988.5	71958	7371.27	68869.5	62870.2	137661	22571.9	85574.6	67737.4	17331.9	77556.2	22672.8	25811.8	23593.9	243751	3.31074e+06	3.27856e+06	3.12951e+06	70648.3	1905.79	1816.94	2736.4
	PSE_109_05M	SRF	PSE	1.09429e+06	1807.48	37137.5	523524	4603.26	27048.6	170082	157613	161414	570545	583822	7545.11	563580	875506	607632	23137.5	345474	291147	18395.6	1.02262e+06	228347	238178	235272	53470	7957.64	7287.69	16751.1	1.02821e+06	1803.39	1682.87	2147.09
	PSE_109_30M	DCM	PSE	99504.7	1740.22	42657.5	67900.2	4057.42	29496.1	75413.8	68737.2	68940.2	92772.1	102190	4848.09	94838.9	83180.8	159048	7107.86	120448	55181.1	6049.96	96698.6	35727.8	38324.6	37394.1	64023.6	53581.9	53064.4	83874.3	102878	1827.57	1595.19	2114.55
	PSE_110_05M	SRF	PSE	162651	1538.61	51647.4	113353	3988.99	42460.2	184944	166733	171593	146799	164200	4494.22	158765	135847	229059	9352.08	146497	104916	7619.5	152609	48837.7	53706.7	52077.7	98455.1	353168	351668	366324	152166	1597.07	1431	1989.98
	PSE_110_50M	DCM	PSE	69565.8	3322.7	41553.1	51516.8	5555.31	32678.3	80852.4	75196.1	76421.2	66497.5	72162.1	7619.3	70789.1	59199.6	113090	7320.01	79870.8	47633	6618.62	70652.3	21540.6	23797.4	22489.6	61621.4	1.47047e+06	1.47744e+06	1.50541e+06	68639.1	2688.85	2576.78	3255.58
	PSE_111_05M	SRF	PSE	33020.4	1953.22	47967.2	28664.9	4678.04	33736.3	27332	24827.9	25970.7	47513.2	42999.3	4487.25	33826.8	25139.7	111268	3407.64	87117.9	21527.1	3501.95	29146.6	21358.2	22574.8	22615.5	86807.9	206376	203046	223561	34395.2	1933.55	1851.59	2395.6
	PSE_111_90M	DCM	PSE	8520.48	5106.72	48111.4	10869.5	5444.31	39657.4	13505.7	12383.6	12309.2	14174.7	9815.37	6579.4	10315.6	8175.21	27594.7	5563.72	27868.6	11980.6	3697.16	12284.7	4861.23	5554.95	5351.96	58442.6	6.18184e+06	6.06867e+06	5.84689e+06	10234.8	3461.7	2895.5	5745.33
	PSE_93_05M	SRF	PSE	1893.63	970.775	542331	1441	3794.74	545186	2445.05	2387.6	1726.55	3440.74	1730.24	5157.97	2484.96	1364.09	2691.72	30116.5	2680.15	1339.9	22096.6	3319.24	947.034	1002.32	1106.43	104317	15564.1	14703.4	14831.9	2175.88	1054.21	1027.75	1185.52
	PSE_93_35M	DCM	PSE	772.103	652.243	58844	568.042	4649.42	55946.1	2574.76	2494.38	447.667	2765.03	540.204	2263.4	583.615	580.067	809.885	15367.4	3080.42	482.275	12870.3	3051.68	431.442	786.025	570.462	11299.4	6429.87	6267.04	6248.82	2684.39	690.898	725.086	742.152
	PSE_94_05M	SRF	PSE	24540.9	653.751	5.80225e+06	25372.1	4078.07	5.75739e+06	33557.7	29755.9	39421.2	79251.1	46330.9	2856.82	49202.7	17296.7	41483.7	14163	32422.4	24655.9	10829	33055	13727.1	11940.7	11696	2.2825e+06	62466.2	56994.4	60356.9	30397.4	655.516	671.999	790.748
	PSE_96_05M	SRF	PSE	1.16586e+06	416.705	4.81806e+06	618060	3248.12	4.83487e+06	135175	126928	131003	655055	512191	605.495	492530	984262	608108	2164.72	331698	311555	2352.19	1.36196e+06	223536	240640	235181	319878	1017.16	838.631	1939.35	1.39999e+06	389.796	398.691	375.925
	PSE_98_05M	SRF	PSE	2.47578e+06	288.997	164358	1.336e+06	1803.33	147887	289011	266596	276238	1.35122e+06	1.09728e+06	521.725	1.04083e+06	2.16202e+06	1.37356e+06	1399.27	748552	711944	1672.36	2.70607e+06	482435	517056	502433	90957.4	890.434	608.289	1428.04	2.74792e+06	267.555	281.18	308.666
	PSE_99_05M	SRF	PSE	3.19471e+06	455.313	2.43034e+06	1.9712e+06	2024.38	2.44013e+06	694522	653201	663983	2.91393e+06	2.56561e+06	868.998	2.44744e+06	3.17495e+06	2.62024e+06	1402.63	1.46424e+06	1.40058e+06	1599.6	3.10712e+06	711910	779912	747185	192648	3011.12	1601.93	7303.02	3.17575e+06	405.413	417.005	428.488
	PSW_112_05M	SRF	PSW	4.50293e+06	934.092	448815	2.81876e+06	2847.05	429432	921962	854912	881826	3.21194e+06	2.55636e+06	1716.1	2.42935e+06	4.02091e+06	3.88828e+06	2527.64	2.23373e+06	2.13657e+06	2575.02	4.70517e+06	995589	1.08072e+06	1.04498e+06	410975	221374	217950	225626	4.75922e+06	814.754	745.556	973.316
	PSW_122_05M	SRF	PSW	30684.1	1935.84	46210.5	29270.6	4315.38	33370	27344.6	25056	25750.7	55109.1	46607.4	4938.85	40197.3	27325.6	117265	3043.75	91450.4	22465.6	3022.75	29504.3	20920.5	23771.9	24656.9	93646	57222.1	55010.3	71321	43062.6	2013.79	2008.35	2613.02
	PSW_123_05M	SRF	PSW	1836.23	1228.38	6107.72	1895.38	4851.23	1974.25	3295.35	3176.9	1675.38	4516.15	2547.53	4547.49	2333.8	2005.86	7104.42	26567.2	10889.4	1552.13	22821.3	4049.27	1452	1882.54	1801.18	5162.04	5620.78	5000.55	13309	3972.43	1175.1	1151.62	1270.85
	PSW_124_05M	SRF	PSW	32852.9	3122.11	50005.2	31669.3	7761.01	34621.9	30578.8	27548.1	27217.5	58617.7	50293	11183.3	45452.6	30755.6	127809	41467.8	93317.4	24626.2	34880.3	32398.7	22824.9	25472.3	25911.9	101684	54952.7	53283.9	64422.1	43585.4	3369.35	3298.31	3726.54
	PSW_125_05M	SRF	PSW	16595.7	1628.79	26871.2	16820.8	4614.32	19240.8	16786.2	15024.3	14645.9	30173	28076	5289.96	24655	17386.4	66310.2	17093.6	51500.8	13492.7	14437.2	17698.1	12122.9	14158.7	14202.5	55786.5	24841.5	23588.1	28033.7	22486.6	1834.32	1758.64	2074.2
	PSW_128_05M	SRF	PSW	82003.6	1819.01	39810.4	64526.4	4162.08	27377.4	72168.7	63996.9	65616.9	89796.1	133076	4562.23	127188	73159.2	151822	5877.77	102259	49686.5	6327.35	77373.9	31154.9	34701.4	33832	78155.1	102265	101316	116222	83442.3	1877.4	1726.53	2427.45
	PSW_128_40M	DCM	PSW	80319.9	1585.24	34173.1	68684.6	3378.39	24282.3	91785.3	83552.8	84905.1	99822.6	171760	4076.36	164381	76207.7	157805	5218.67	105766	59517	5183.45	76218.3	32251.5	36266.2	35080.1	73686.5	105835	104818	120968	82290.6	1617.83	1519.64	1920.64
	RED_31_05M	SRF	RED	1.13651e+07	1535.14	131446	4.89062e+06	3786	99120.1	659961	626783	653901	3.20686e+06	2.99789e+06	4183.73	2.94786e+06	9.1218e+06	3.85963e+06	15280.3	2.02781e+06	1.90603e+06	12673	1.0932e+07	1.77017e+06	1.85448e+06	1.8325e+06	76056.2	92005.4	84979.4	97119.3	1.08204e+07	1437.61	1323.5	1569.12
	RED_32_05M	SRF	RED	9.61546e+06	716.776	112517	4.05157e+06	2132.07	73025.9	529387	500407	523360	2.65999e+06	2.48334e+06	2059.02	2.43991e+06	7.54211e+06	3.22599e+06	6147.79	1.68523e+06	1.57522e+06	4872.68	9.11931e+06	1.46803e+06	1.53028e+06	1.52725e+06	51140	25015.3	19053	45002.3	9.10072e+06	725.315	672.125	735.793
	RED_32_80M	DCM	RED	650597	9790.48	15729.3	287494	12351.8	11059.5	52649	50689.3	51450.7	199246	182053	30486.7	181054	519844	288795	425477	160088	147963	691344	654413	108548	112561	108515	10727.4	515778	512624	533487	630761	8156.62	7931.49	10111
	RED_33_05M	SRF	RED	2.24038e+06	1582.97	16638.6	984877	3986.34	11242.8	136639	129432	136375	644667	593633	8616.09	589474	1.83028e+06	849036	48748.6	419932	398260	39229.8	2.07088e+06	354493	374299	369734	8165.12	6945.97	4191.36	5313.92	2.03608e+06	1514.16	1511.76	1700.63
	RED_34_05M	SRF	RED	1.22867e+06	840.142	8789.3	533045	3080.81	5854.14	77079.8	72566.4	76116.1	354428	325169	4850.18	322438	989327	470641	27903.3	230649	219908	22441.7	1.13049e+06	196977	204596	203433	4792.26	3684.96	1999.52	2734.8	1.11229e+06	939.978	908.484	1024.2
	RED_34_60M	DCM	RED	7372.82	8411.88	3116.99	5426.61	9857.8	1623.86	3556.62	3392.14	2881.95	6003.53	3735.37	37866.8	3541.96	6480.28	12479.4	691713	8361.93	6441.6	1.10164e+06	8035.61	2020.97	2453.59	2235.87	2436.53	127500	125429	133265	7687.79	7193.91	6972.89	8274.26
	SOC_84_05M	SRF	SOC	274.282	695.335	2537.67	522.184	4555.17	310.846	1885.7	1917.32	245.249	2592.1	297.01	767.047	295.593	661.299	397.054	5081.93	2218.72	327.476	5769.99	2428.71	243.082	597.685	406.14	284.473	1366.69	1132.56	1305.86	2325.66	721.966	531.694	567.837
	SOC_85_05M	SRF	SOC	324.313	530.793	3313.31	413.105	4760.57	409.835	2148.05	2174.66	231.294	2718.06	285.647	702.608	275.937	715.043	401.376	5274.9	2402.79	364.25	5938.62	2506.49	255.68	650.479	473.456	384.17	1344.8	1210.82	1773.66	2496.95	564.721	510.954	530.047
	SOC_85_90M	DCM	SOC	291.359	462.446	3312.7	384.425	4130.46	404.226	2033.41	2011.41	240.286	2518.49	289.566	523.098	288.371	716.265	315.067	4961.57	2190.56	299.862	5267.75	2332.58	255.47	557.904	362.315	352.88	1308.71	1327.3	864.683	2274.73	505.315	431.573	467.528
	Relative distribution	Depth_Id	Location	AS9601	SS120	EQPAC1	GP2	LG	MED4	MIT9107	MIT9116	MIT9123	MIT9201	MIT9202	MIT9211	MIT9215	MIT9301	MIT9302	MIT9303	MIT9311	MIT9312	MIT9313	MIT9314	MIT9321	MIT9322	MIT9401	MIT9515	NATL1A	NATL2A	PAC1	SB	SS2	SS35	SS51
	ANE_004_05M	SRF	ANE	0.0124392	0.00021463	4.04571	0.00994607	0.000917168	4.03607	0.00657531	0.0069956	0.00759307	0.0124783	0.00813834	0.000644742	0.0102366	0.0166679	0.0456606	0.00334659	0.0230945	0.0171339	0.00256548	0.0249184	0.00386284	0.00383335	0.00410765	0.152836	0.150387	0.141478	0.125699	0.0166695	0.000240987	0.000209517	0.000219888
	ANE_004_40M	DCM	ANE	0.00480911	0.00042459	0.951313	0.00446311	0.00140805	0.948412	0.00348961	0.00334158	0.00337497	0.005465	0.00347287	0.000720909	0.0039121	0.00534366	0.0232929	0.00534423	0.0118712	0.00835488	0.00297681	0.00931472	0.00162905	0.00181427	0.00180508	0.0464846	1.24856	1.18041	1.03675	0.00560766	0.000711217	0.000458489	0.000426306
	ANE_150_05M	SRF	ANE	0.0742817	0.000300894	2.33279	0.0471826	0.00118998	2.32461	0.0183332	0.0177007	0.0183941	0.0415542	0.0319214	0.000800776	0.0324447	0.0665099	0.125121	0.00449964	0.0541633	0.0491268	0.00325511	0.089807	0.0165126	0.0175544	0.0172101	0.142048	0.313976	0.298226	0.259873	0.0754	0.000321025	0.000260953	0.000297895
	ANE_150_40M	DCM	ANE	0.104416	0.000263351	1.99456	0.0637212	0.000995226	1.97941	0.0236143	0.0225327	0.0236393	0.0533717	0.0412393	0.00070621	0.0417273	0.0908134	0.162993	0.00351497	0.0718092	0.0653874	0.00282159	0.121785	0.0216719	0.023346	0.02235	0.121436	0.289173	0.274054	0.239313	0.104949	0.000238881	0.00020314	0.000243235
	ANE_151_05M	SRF	ANE	0.0161233	0.000160564	1.86976	0.0124322	0.000833303	1.86321	0.00607606	0.00621472	0.00625624	0.0123662	0.00883342	0.0003935	0.00952207	0.0168642	0.0335606	0.0021204	0.0197286	0.01404	0.00179123	0.024952	0.00429221	0.0045566	0.00465069	0.0939825	0.065454	0.0616523	0.0548352	0.018384	0.00014063	0.000134919	0.000161855
	ANE_151_80M	DCM	ANE	0.00324633	0.000430659	0.47958	0.00277578	0.00115539	0.476724	0.00169589	0.00181113	0.00154001	0.00307089	0.00199973	0.00081	0.00222954	0.00371624	0.00801684	0.020095	0.00470552	0.00335443	0.00733468	0.00545956	0.00101267	0.00110761	0.00108672	0.0271901	0.111282	0.104878	0.0924536	0.0039776	0.000394707	0.000391727	0.000455132
	ANE_152_05M	SRF	ANE	0.00342582	0.000305538	1.40226	0.00263826	0.00124543	1.39467	0.00253904	0.00289058	0.0027895	0.00436396	0.00299348	0.00111042	0.0038967	0.00417319	0.0104464	0.00607373	0.00562294	0.00367549	0.00438625	0.00632025	0.00128922	0.00136898	0.0013468	0.088595	0.231762	0.219386	0.209015	0.00440907	0.000316664	0.000286404	0.00036267
	ANW_141_05M	SRF	ANW	0.342174	0.000867475	0.00694453	0.116888	0.00233992	0.00511162	0.0134956	0.0128479	0.0127743	0.0692161	0.0725388	0.00478558	0.0707011	0.24914	0.080024	0.0289583	0.0412369	0.039382	0.0229473	0.340649	0.0459938	0.0477656	0.0476739	0.000758645	0.0011395	0.000874541	0.00103959	0.340192	0.000940983	0.000882881	0.0009881
	ANW_142_05M	SRF	ANW	1.12703	0.000331967	0.0203671	0.407098	0.00126312	0.0164553	0.0464927	0.0444241	0.045802	0.245596	0.25558	0.00116911	0.250291	0.868849	0.294024	0.00779839	0.148393	0.140438	0.0066669	1.14164	0.157462	0.163318	0.163876	0.00339666	0.00309932	0.00273927	0.00288117	1.0959	0.000310344	0.000276707	0.000338912
	ANW_145_05M	SRF	ANW	0.00170994	0.000210505	0.000741733	0.000722542	0.00115906	0.00019934	0.000464008	0.000448281	0.000119866	0.000840466	0.000452381	0.000655489	0.000411604	0.00136384	0.000604607	0.00387348	0.000707429	0.00030824	0.00304812	0.0020074	0.000286516	0.000355951	0.000348496	8.30013e-05	0.000863443	0.000705624	0.00122349	0.00203561	0.000194659	0.000203368	0.000208134
	ANW_146_05M	SRF	ANW	0.148257	0.00024074	0.0053992	0.0584716	0.00124078	0.00444071	0.00997591	0.00934071	0.00909787	0.0376617	0.0365631	0.000716767	0.0361778	0.119694	0.06259	0.00424637	0.0305567	0.0294395	0.00364597	0.149334	0.0220916	0.022867	0.022845	0.00152124	0.080069	0.0743888	0.0601253	0.140434	0.000245477	0.000217247	0.000262425
	ANW_148_05M	SRF	ANW	0.318197	0.000352019	0.0137657	0.123055	0.00146804	0.011975	0.0200638	0.0186441	0.0192173	0.0789017	0.0765609	0.00141147	0.075489	0.249606	0.122027	0.0089431	0.0595633	0.0572371	0.00746625	0.322422	0.0470435	0.0490814	0.0486214	0.0024528	0.0595248	0.0565403	0.0455733	0.307968	0.000359115	0.000350929	0.000379973
	ANW_149_05M	SRF	ANW	0.0489693	0.000272223	0.0753733	0.0267413	0.00145445	0.0739611	0.00902962	0.00833469	0.00837368	0.0215856	0.0172725	0.00103731	0.0172759	0.042913	0.0594613	0.00594076	0.0271016	0.025856	0.00506523	0.0516637	0.00950231	0.0103086	0.00995522	0.0113652	0.0668136	0.0620262	0.0506623	0.046699	0.000309294	0.000284946	0.000304592
	ASE_66_05M	SRF	ASE	0.00292393	0.000105936	0.169366	0.00179465	0.000791231	0.168806	0.00103877	0.00102502	0.000803076	0.00213778	0.00135926	0.000240314	0.00146629	0.00236646	0.00382066	0.00124293	0.00263674	0.0018207	0.00109763	0.00326243	0.000694303	0.000820802	0.00071775	0.017344	0.0791184	0.0751129	0.0650738	0.00311918	0.000115726	9.75784e-05	0.000110266
	ASE_66_30M	DCM	ASE	0.00340017	0.000165058	0.23365	0.00205392	0.000894067	0.234054	0.00121243	0.00128827	0.000975534	0.0024582	0.00163527	0.000375846	0.0016668	0.00273339	0.00460782	0.00208327	0.00301864	0.00212547	0.00177711	0.00371018	0.000892811	0.000886	0.000831868	0.0240797	0.105383	0.0990961	0.0878691	0.00328189	0.000146998	0.000150085	0.000166249
	ASE_67_05M	SRF	ASE	5.92915e-05	0.00017119	0.000681342	0.000118445	0.00109858	0.000160357	0.000392174	0.000393487	4.45762e-05	0.000496137	5.61648e-05	0.000541348	4.80032e-05	8.90337e-05	8.36513e-05	0.00349462	0.000474191	7.56328e-05	0.00294217	0.000489902	7.80513e-05	0.000124797	9.01367e-05	7.86714e-05	0.00048556	0.000412883	0.00080835	0.000476767	0.000177485	0.000193886	0.0002009
	ASE_68_05M	SRF	ASE	0.00768912	0.000659499	2.97315	0.00542017	0.00206321	2.96407	0.00457132	0.00476849	0.00517599	0.00879631	0.00634536	0.00209801	0.00743547	0.0053425	0.0193436	0.0111184	0.00747952	0.0055611	0.00824749	0.00890909	0.00243773	0.00258062	0.00260625	0.141366	1.11214	1.06146	0.916364	0.00850922	0.000675307	0.000547362	0.000721269
	ASE_68_50M	DCM	ASE	0.00720463	0.000633576	2.96356	0.00506629	0.00159481	2.96097	0.00412345	0.0047523	0.00489912	0.00790444	0.00593865	0.00183219	0.00713417	0.00499019	0.0181229	0.0092603	0.00723532	0.0051825	0.00685949	0.00764594	0.00230412	0.00237668	0.00242729	0.13792	1.37256	1.31112	1.13285	0.00774496	0.000619	0.000469946	0.000640116
	ASE_70_05M	SRF	ASE	0.0311771	0.000432986	0.222682	0.0194841	0.000869042	0.219236	0.020623	0.0194401	0.0198192	0.0275949	0.0327588	0.000790691	0.0322971	0.0262062	0.0322414	0.00259374	0.0191137	0.017323	0.00216971	0.0307005	0.00815875	0.00889059	0.00848423	0.0755027	0.899781	0.875167	0.774993	0.0288424	0.000310456	0.000277233	0.00049346
	ASW_72_05M	SRF	ASW	1.33985	0.000145736	0.0202195	0.629592	0.000538232	0.0131114	0.113261	0.107772	0.11104	0.534991	0.436373	0.000293016	0.429534	1.0433	0.5623	0.00080763	0.303594	0.283597	0.000810948	1.27847	0.238451	0.250336	0.247882	0.0155314	0.0103687	0.0099213	0.013417	1.32854	0.000136852	0.000129782	0.000142245
	ASW_72_100M	DCM	ASW	0.0813479	0.00162003	0.00667001	0.0439674	0.00183833	0.00479665	0.0211768	0.0196548	0.0203559	0.0403482	0.0333902	0.00304961	0.0328251	0.0651693	0.0555745	0.000815912	0.0328764	0.0280498	0.000923741	0.0793869	0.01619	0.0170758	0.0167486	0.00648557	0.506145	0.499565	0.505501	0.0806126	0.00110636	0.0012384	0.00167623
	ASW_76_05M	SRF	ASW	0.899023	0.000179876	0.0313825	0.469904	0.000878296	0.0275455	0.0846212	0.0798947	0.0815226	0.346167	0.289675	0.000430394	0.282068	0.755855	0.437718	0.00175801	0.231669	0.22156	0.00162053	0.898027	0.15687	0.165959	0.16396	0.0285832	0.001079	0.000834977	0.00199423	0.921472	0.000187064	0.000156065	0.000177977
	ASW_78_05M	SRF	ASW	1.16264	0.000278283	0.942785	0.630885	0.000922888	0.941635	0.147705	0.138119	0.141443	0.473663	0.388204	0.00090624	0.377817	1.05225	0.851456	0.00394004	0.430542	0.415033	0.00311451	1.20012	0.209657	0.222589	0.21836	0.169941	0.0629477	0.0570198	0.048796	1.14269	0.000284488	0.000252248	0.00027731
	ASW_82_05M	SRF	ASW	0.000348276	0.000309001	0.00113556	0.000273767	0.00187164	0.000162096	0.000801204	0.000808055	0.000107286	0.00119187	0.000220329	0.0002571	0.000201843	0.000462703	0.000304289	0.00232538	0.000959064	0.000192621	0.00238494	0.00119785	0.000159844	0.000280847	0.00020595	0.00011955	0.000744605	0.00056228	0.00099614	0.00120829	0.000322356	0.000249817	0.000231428
	ASW_82_40M	DCM	ASW	0.000129859	0.000219661	0.000966324	0.000127938	0.00153979	0.000120863	0.0006779	0.000667883	8.35449e-05	0.000924247	0.00011286	0.00021008	0.00012089	0.000306069	0.000142324	0.00183288	0.000758545	0.000107175	0.00193288	0.000829255	9.09822e-05	0.000209053	0.000146775	0.000111023	0.000552291	0.000496664	0.000646895	0.000821944	0.000218854	0.000185969	0.000189102
	ION_36_05M	SRF	ION	0.0396574	0.000393414	0.000971226	0.0173927	0.00119323	0.00028273	0.00321579	0.00304474	0.00299273	0.0131519	0.0121962	0.00208378	0.012334	0.0309405	0.0146706	0.012127	0.00854491	0.00767477	0.00942871	0.0350193	0.00717193	0.00731685	0.00719693	0.000275547	0.000557354	0.000383309	0.000471897	0.0352897	0.000425326	0.000348067	0.000401199
	ION_36_17M	DCM	ION	0.0358672	0.000435767	0.000879086	0.0156884	0.00132666	0.000247071	0.00298061	0.00290574	0.0025819	0.0116743	0.0111047	0.00233054	0.0112793	0.0281093	0.0130204	0.0140926	0.00763473	0.00675591	0.0110141	0.0321995	0.00647361	0.00667661	0.00637116	0.000222228	0.000532268	0.000430849	0.000500331	0.0313295	0.000457624	0.000417198	0.000473539
	ION_38_05M	SRF	ION	0.95302	0.0005203	0.00554298	0.415701	0.00136805	0.00424686	0.0679796	0.0648549	0.0674893	0.312728	0.291539	0.00265403	0.294971	0.740359	0.356249	0.0150517	0.188448	0.178101	0.011531	0.837513	0.167407	0.174852	0.172162	0.00488332	0.00120606	0.00100744	0.00115414	0.83053	0.000526241	0.000469333	0.000552766
	ION_38_25M	DCM	ION	0.741016	0.00063897	0.00583537	0.338255	0.00161381	0.00454825	0.062727	0.0601841	0.0633004	0.255487	0.234909	0.00430562	0.238962	0.589092	0.311137	0.0232924	0.170531	0.161384	0.0186173	0.649644	0.13204	0.137378	0.132915	0.00578649	0.00413705	0.00382211	0.00412889	0.641931	0.00064093	0.000632403	0.00071143
	ION_39_25M	DCM	ION	1.11862	0.00041681	0.00684641	0.497895	0.00110043	0.00496266	0.0779492	0.0755513	0.0798026	0.35322	0.303537	0.00227502	0.306124	0.87829	0.434392	0.0130179	0.234024	0.22051	0.0107242	1.00975	0.183128	0.191447	0.18312	0.00491923	0.00150064	0.00104987	0.00179324	1.02208	0.000416142	0.000407303	0.0004247
	ION_41_05M	SRF	ION	2.6984	0.00018682	0.0190211	1.07331	0.000709693	0.0114716	0.132904	0.126378	0.132061	0.71566	0.65394	0.000551519	0.640341	2.04998	0.788839	0.00225064	0.417038	0.388753	0.00184298	2.39797	0.400874	0.417203	0.415156	0.0110369	0.00104267	0.000497403	0.00641731	2.5756	0.000191138	0.000171811	0.00019699
	ION_41_60M	DCM	ION	0.169103	0.000796093	0.0307484	0.103112	0.00133788	0.0262034	0.0503479	0.0466888	0.0500788	0.104069	0.0741363	0.00313347	0.0731125	0.13888	0.201504	0.000963674	0.114785	0.10524	0.00133488	0.155951	0.0404237	0.0443345	0.0397703	0.0296085	0.0224213	0.0218972	0.0271722	0.158826	0.000735776	0.000680282	0.000889671
	ION_42_05M	SRF	ION	2.23165	0.000172919	0.0188964	0.864301	0.000629545	0.0111125	0.102112	0.0971195	0.101079	0.556585	0.529546	0.000348283	0.515777	1.64248	0.6094	0.000796964	0.322961	0.300115	0.00071143	1.99444	0.322302	0.335072	0.334006	0.011744	0.0009808	0.000695103	0.0091122	2.17714	0.000149034	0.000143991	0.000163009
	ION_42_80M	DCM	ION	0.269737	0.00069585	0.0407316	0.149369	0.00118057	0.0338969	0.0628519	0.0591868	0.0627853	0.145223	0.105747	0.00465981	0.102513	0.216771	0.2509	0.000712813	0.14604	0.127927	0.000852415	0.251352	0.0578235	0.0629355	0.0574095	0.0383583	0.0189581	0.0183249	0.0283033	0.2641	0.000616371	0.000590846	0.00070126
	ION_45_05M	SRF	ION	4.12693	0.000219162	0.0243289	1.6042	0.00071132	0.0152152	0.186938	0.18086	0.186947	1.04922	0.9963	0.00057852	0.9791	3.11721	1.09767	0.00152101	0.572421	0.54124	0.00128022	3.69181	0.602835	0.628647	0.626222	0.0126451	0.000976019	0.000600158	0.00540116	4.05818	0.000211047	0.000211678	0.00022833
	ION_48_05M	SRF	ION	3.87513	0.0001683	0.021346	1.46526	0.000664683	0.0134716	0.16605	0.161353	0.166227	1.0049	0.962923	0.000319899	0.941979	2.94306	0.949896	0.000502375	0.504551	0.476454	0.000520997	3.51817	0.556728	0.578828	0.579042	0.00997436	0.000642541	0.000479076	0.00179707	4.02933	0.000181687	0.000160877	0.000170719
	IOS_52_05M	SRF	IOS	0.244455	0.00128663	0.0370766	0.129553	0.00209877	0.0291078	0.0529185	0.0488597	0.0487302	0.163754	0.171314	0.00339096	0.165657	0.191596	0.209333	0.00184584	0.132891	0.0830529	0.00162544	0.226463	0.0594933	0.0635401	0.0623115	0.0677996	0.0157226	0.0150214	0.018328	0.252101	0.00135222	0.00128545	0.00162326
	IOS_52_75M	DCM	IOS	0.371352	0.00137553	0.0131863	0.198265	0.0014935	0.00995043	0.0865442	0.0814881	0.0834964	0.239718	0.227777	0.00250269	0.223448	0.30111	0.261424	0.00142255	0.15136	0.136564	0.00134677	0.354459	0.0778575	0.0832136	0.0799118	0.0176651	0.780773	0.780843	0.805654	0.36445	0.000943194	0.000880017	0.00145993
	IOS_56_05M	SRF	IOS	2.23393	0.000360911	0.0223352	0.983832	0.0010288	0.0148541	0.148838	0.141132	0.146587	0.712186	0.636218	0.000697417	0.626262	1.72754	0.817885	0.00144567	0.430277	0.401783	0.00131252	2.01538	0.363789	0.38199	0.375249	0.0176518	0.00795703	0.00705185	0.0150667	2.14661	0.000338838	0.000317361	0.000362264
	IOS_57_05M	SRF	IOS	1.51961	0.000748158	0.0130848	0.664084	0.00203347	0.00806969	0.0978285	0.095545	0.0989639	0.450648	0.40112	0.00363878	0.397473	1.19407	0.560127	0.0204329	0.295451	0.276285	0.0169559	1.39272	0.240358	0.251674	0.242497	0.00759472	0.00630038	0.00534723	0.010152	1.46539	0.000797863	0.000742702	0.000879027
	IOS_58_66M	DCM	IOS	1.74215	0.000367697	0.0168848	0.726306	0.000934094	0.010437	0.107001	0.102853	0.107529	0.503016	0.446267	0.00100548	0.442881	1.30738	0.610616	0.00319587	0.326207	0.304303	0.00282296	1.59156	0.270728	0.28251	0.275141	0.0106881	0.0682283	0.0668822	0.0790258	1.68406	0.000304103	0.000307515	0.000390431
	IOS_62_05M	SRF	IOS	1.62465	0.000259623	0.0161221	0.699718	0.000890923	0.00943664	0.100527	0.0953471	0.0995791	0.470222	0.414295	0.000857827	0.408092	1.2347	0.5835	0.00439247	0.306033	0.286203	0.00367207	1.45014	0.252811	0.262932	0.26111	0.00941474	0.00560352	0.00472311	0.00973485	1.53626	0.000258437	0.000232303	0.000243783
	IOS_64_05M	SRF	IOS	2.18133	0.000326854	0.0260638	1.02842	0.00101673	0.0211259	0.164142	0.156631	0.161012	0.7066	0.620251	0.00106861	0.615526	1.75608	0.924881	0.00528755	0.487617	0.466035	0.00442298	2.04444	0.365731	0.383552	0.38036	0.0235386	0.0421841	0.0407712	0.0401755	2.08473	0.00031749	0.000288022	0.000342559
	IOS_64_65M	DCM	IOS	0.76097	0.000443248	0.0127089	0.368443	0.00163846	0.00909993	0.0624582	0.0592081	0.0612105	0.251694	0.219245	0.00178065	0.219565	0.618507	0.344671	0.00971406	0.184355	0.171658	0.00850646	0.724247	0.131528	0.138141	0.134877	0.0104311	0.0344444	0.0330574	0.0336426	0.725363	0.000448662	0.000413324	0.000463507
	IOS_65_05M	SRF	IOS	0.27056	0.00022245	0.00460638	0.122293	0.000917067	0.00270133	0.0195784	0.0183849	0.0187925	0.0823292	0.0728436	0.000869698	0.0722329	0.210068	0.109404	0.00483602	0.0594257	0.0554467	0.00420237	0.246471	0.0436977	0.0460772	0.0456332	0.00284217	0.0100129	0.00934864	0.00972817	0.254009	0.000216418	0.000201881	0.000225765
	IOS_65_30M	DCM	IOS	0.140992	0.000463644	0.00318083	0.0667759	0.00185361	0.00163071	0.0115228	0.0110183	0.0111157	0.046982	0.0407185	0.00194204	0.0405308	0.111775	0.0593031	0.0184025	0.0327127	0.0293635	0.0150315	0.13232	0.0251035	0.0263939	0.0255811	0.00186938	0.00685194	0.00651943	0.00673578	0.134451	0.000497816	0.000459182	0.000511529
	MED_18_05M	SRF	MED	0.0122827	0.000332154	4.33978	0.00699262	0.00102067	4.34421	0.00493228	0.00531039	0.00542266	0.0102431	0.0055636	0.000478598	0.00820066	0.0122052	0.0342452	0.00595889	0.0136442	0.00971977	0.00231154	0.0276163	0.00320887	0.00319226	0.00339405	0.160888	0.298876	0.28549	0.243794	0.0131726	0.000380956	0.000311646	0.000371689
	MED_18_60M	DCM	MED	0.0133871	0.000196404	4.97376	0.00725257	0.000807606	4.97302	0.0053413	0.00528038	0.00596874	0.010839	0.00605265	0.00031869	0.00902321	0.0133192	0.0383709	0.00100278	0.0146596	0.0103282	0.000832224	0.0304697	0.00346923	0.00335707	0.00362988	0.171517	0.347661	0.331214	0.28255	0.014205	0.000242014	0.000180503	0.000169883
	MED_23_05M	SRF	MED	0.00133494	0.000200233	0.438109	0.000588264	0.00151525	0.432023	0.000814108	0.000863369	0.000472412	0.00145902	0.000510399	0.000549493	0.000859429	0.000940517	0.00312278	0.00398622	0.00149128	0.000956251	0.00314625	0.00413432	0.000357349	0.000431764	0.00041289	0.00768459	0.0992208	0.0969049	0.0821864	0.00162827	0.000234555	0.000211863	0.000188779
	MED_25_05M	SRF	MED	0.00167327	0.00037647	0.647731	0.000706821	0.00140957	0.652402	0.000720767	0.000860003	0.000596569	0.00139738	0.000674688	0.00160744	0.00105302	0.00136122	0.00453091	0.0109794	0.0015194	0.00114054	0.00821556	0.00510128	0.000435892	0.000423567	0.000488295	0.0105628	0.221362	0.214954	0.179709	0.001764	0.000382363	0.000345805	0.000408355
	MED_25_50M	DCM	MED	0.00440215	0.00230815	1.6301	0.00170524	0.00288308	1.63681	0.00150774	0.00172638	0.00161967	0.00268952	0.00174039	0.00314921	0.00264513	0.00461004	0.0150485	0.0915526	0.00523496	0.00311919	0.0290827	0.0195276	0.000974331	0.000940299	0.00113915	0.0277829	3.32978	3.21757	2.7025	0.00352404	0.00228485	0.00174607	0.00236029
	MED_30_05M	SRF	MED	0.0017366	8.42314e-05	0.381877	0.000672789	0.000661862	0.385133	0.000468148	0.00051828	0.000391048	0.00108553	0.000455836	0.000197553	0.000635356	0.00121227	0.00278702	0.0014539	0.00114846	0.000719579	0.0011549	0.00358172	0.000317446	0.000369576	0.000335814	0.00509055	0.0114679	0.0134239	0.0110027	0.00204987	8.31047e-05	8.7621e-05	0.000102106
	MED_30_70M	DCM	MED	0.00875451	0.000189652	2.91987	0.00317419	0.000916027	2.93753	0.00218169	0.00242462	0.00225621	0.00485095	0.00278473	0.000773904	0.00427149	0.00658323	0.0194353	0.00467787	0.00686088	0.00593706	0.0032717	0.0232724	0.00171595	0.00154959	0.00180631	0.0402024	0.215249	0.215727	0.178266	0.00989715	0.000202068	0.000212402	0.000246206
	PON_132_05M	SRF	PON	2.46454	0.000165904	0.114045	1.13457	0.000770796	0.106641	0.166925	0.157667	0.163489	0.745618	0.702283	0.000295045	0.674488	2.14099	0.888678	0.000681157	0.448067	0.425072	0.000699988	2.54718	0.383552	0.402818	0.401032	0.0362237	0.000835448	0.000469616	0.00260503	2.64033	0.000180344	0.000150627	0.00018084
	PON_133_05M	SRF	PON	0.00515997	0.000187796	2.11121	0.00409252	0.000810795	2.09808	0.00338135	0.0035681	0.00453831	0.00807866	0.0047536	0.000699062	0.00564175	0.00409719	0.00967477	0.00322958	0.00699145	0.00449047	0.00249257	0.00696169	0.00227743	0.00207075	0.00217216	0.201791	0.0611746	0.0579727	0.0606191	0.00515513	0.00016805	0.000157932	0.000202577
	PON_133_45M	DCM	PON	0.000818879	0.000336084	0.177148	0.000723647	0.000920302	0.173846	0.000904282	0.0009221	0.00075938	0.00151443	0.000869648	0.000806151	0.000932258	0.000547609	0.00204394	0.00330984	0.00640637	0.000700213	0.00251024	0.00288465	0.000342491	0.000416755	0.000394589	0.0234288	0.51098	0.487478	0.489083	0.00085384	0.000321004	0.000256681	0.000376743
	PON_137_05M	SRF	PON	0.164345	0.000604328	0.0154235	0.0953715	0.00141383	0.0109082	0.0504451	0.0458945	0.0466838	0.117937	0.138904	0.00179592	0.132626	0.161727	0.139323	0.00344037	0.0853658	0.0633938	0.00276927	0.152676	0.041792	0.0448436	0.0432327	0.023287	0.00676585	0.00645058	0.0129027	0.152339	0.000627828	0.000583532	0.000684872
	PON_137_40M	DCM	PON	0.000156745	0.000167421	0.000446978	0.000117921	0.000984659	6.40439e-05	0.000381673	0.000370535	9.36011e-05	0.000470244	0.000130017	0.000473254	0.000131437	0.000158044	0.000135057	0.0654188	0.000397637	9.37033e-05	0.046092	0.00047028	7.27954e-05	0.000138322	9.39503e-05	5.99196e-05	0.000377246	0.000397035	0.000404381	0.000461892	0.000164453	0.000170847	0.000206664
	PON_138_05M	SRF	PON	1.77214	0.000270606	0.020916	0.85857	0.000926193	0.0151121	0.195031	0.183687	0.188717	1.08593	1.05101	0.000647859	1.01496	1.42377	0.879409	0.000846917	0.478511	0.44597	0.000867854	1.69612	0.35035	0.369683	0.361985	0.0200131	0.00302818	0.00262081	0.0102429	1.73449	0.000268761	0.000254478	0.000294473
	PON_138_60M	DCM	PON	0.0072008	0.00196676	0.00783525	0.006741	0.00231719	0.00615431	0.00872531	0.00812452	0.00831422	0.00831545	0.00633235	0.00354019	0.00609513	0.00628444	0.0237462	0.00298336	0.0148336	0.0106429	0.0019198	0.00767049	0.00276044	0.00313937	0.0027914	0.00789472	0.586292	0.580392	0.586398	0.00757921	0.00163509	0.00154934	0.00205591
	PON_140_05M	SRF	PON	0.929187	0.000438908	0.00587649	0.399585	0.00138477	0.00370719	0.0576939	0.0541895	0.0567515	0.265361	0.246907	0.00191431	0.243704	0.747752	0.325414	0.0109491	0.173244	0.162903	0.00887188	0.808252	0.147414	0.154247	0.151729	0.00343107	0.00135201	0.000615785	0.00148278	0.829519	0.000429252	0.000416244	0.000462698
	PSE_100_05M	SRF	PSE	0.0101599	0.000519306	0.0153806	0.00899322	0.00121737	0.010418	0.00887632	0.0080583	0.00782219	0.0161015	0.0143701	0.00132263	0.0118762	0.00849026	0.0363065	0.000794924	0.0299126	0.00683425	0.000808142	0.00906316	0.0068401	0.00739083	0.0075605	0.0270522	0.00929077	0.00886614	0.0164461	0.0117398	0.000532171	0.000509326	0.0006507
	PSE_100_50M	DCM	PSE	0.00263296	0.00114231	0.0529923	0.00297788	0.00145255	0.0488044	0.00395252	0.00349095	0.00358253	0.00433012	0.00304152	0.00161126	0.00339806	0.00233028	0.00803801	0.00246692	0.00792894	0.00336961	0.00173957	0.00400662	0.00149431	0.00169409	0.00162726	0.0531035	1.91957	1.8691	1.75594	0.00282997	0.000844552	0.000622431	0.00116989
	PSE_102_05M	SRF	PSE	0.0416744	0.000376123	0.0311855	0.0285709	0.00108521	0.0268163	0.0207775	0.0187837	0.0193961	0.0366643	0.038887	0.00146973	0.0364738	0.0338817	0.0597996	0.00430875	0.0388989	0.0266308	0.00340172	0.039257	0.0132112	0.0145364	0.0139698	0.0384028	0.0114825	0.0111184	0.0156573	0.0387538	0.000422732	0.000429512	0.000453945
	PSE_102_40M	DCM	PSE	0.0194775	0.000579016	0.0567213	0.0148642	0.00108484	0.0530321	0.0118884	0.0108237	0.0113176	0.0192783	0.0184992	0.00189503	0.0177052	0.0161629	0.0353904	0.00580286	0.0219998	0.0174142	0.00445574	0.0199384	0.0058288	0.00663577	0.0060656	0.0626643	0.851136	0.842863	0.804545	0.0181625	0.000489945	0.000467105	0.000703481
	PSE_109_05M	SRF	PSE	0.314621	0.000519669	0.0106774	0.150519	0.00132349	0.00777676	0.0489003	0.0453153	0.0464083	0.164038	0.167855	0.0021693	0.162035	0.251717	0.174701	0.00665227	0.0993275	0.0837081	0.00528894	0.294014	0.0656524	0.0684788	0.0676434	0.0153732	0.00228791	0.00209529	0.00481612	0.295621	0.000518495	0.000483844	0.000617313
	PSE_109_30M	DCM	PSE	0.0307302	0.000537436	0.013174	0.0209697	0.00125306	0.00910933	0.0232901	0.0212282	0.0212909	0.0286509	0.0315593	0.00149724	0.0292892	0.0256888	0.049119	0.00219513	0.037198	0.0170417	0.00186842	0.0298635	0.0110339	0.0118358	0.0115485	0.0197725	0.0165478	0.0163879	0.025903	0.0317721	0.000564409	0.000492645	0.00065304
	PSE_110_05M	SRF	PSE	0.0533609	0.000504771	0.0169439	0.0371876	0.00130867	0.0139299	0.0606746	0.0547002	0.0562944	0.0481602	0.053869	0.00147442	0.052086	0.0445672	0.0751474	0.00306813	0.0480611	0.0344198	0.00249973	0.0500662	0.0160222	0.0176195	0.0170851	0.0323001	0.115864	0.115372	0.12018	0.0499209	0.000523949	0.000469469	0.000652852
	PSE_110_50M	DCM	PSE	0.0181406	0.000866458	0.0108358	0.013434	0.00144865	0.00852149	0.0210838	0.0196088	0.0199283	0.0173405	0.0188177	0.00198688	0.0184596	0.0154374	0.0294904	0.00190883	0.0208279	0.0124212	0.00172593	0.0184239	0.00561712	0.00620563	0.0058646	0.016069	0.383453	0.385271	0.392564	0.017899	0.000701169	0.000671944	0.000848955
	PSE_111_05M	SRF	PSE	0.00935637	0.000553449	0.0135916	0.00812224	0.00132553	0.00955924	0.00774456	0.00703503	0.00735884	0.0134629	0.0121839	0.00127147	0.00958488	0.00712336	0.0315278	0.000965561	0.024685	0.00609973	0.000992281	0.00825873	0.00605187	0.0063966	0.00640815	0.0245972	0.058477	0.0575334	0.0633464	0.00974593	0.000547875	0.000524652	0.000678796
	PSE_111_90M	DCM	PSE	0.00245134	0.0014692	0.0138416	0.00312716	0.00156632	0.0114094	0.0038856	0.00356276	0.00354136	0.00407805	0.00282388	0.00189289	0.00296779	0.002352	0.00793897	0.00160068	0.00801779	0.0034468	0.00106367	0.00353429	0.00139857	0.00159816	0.00153975	0.0168139	1.77851	1.74595	1.68215	0.00294454	0.00099593	0.000833035	0.00165293
	PSE_93_05M	SRF	PSE	0.000710914	0.000364452	0.203604	0.000540986	0.00142464	0.204676	0.00091793	0.000896363	0.000648188	0.00129174	0.000649574	0.00193643	0.000932914	0.00051211	0.00101054	0.0113065	0.00100619	0.000503029	0.00829559	0.00124612	0.000355539	0.000376297	0.000415382	0.0391633	0.00584313	0.00552	0.00556827	0.000816878	0.000395774	0.00038584	0.000445071
	PSE_93_35M	DCM	PSE	0.000247114	0.000208752	0.0188332	0.000181803	0.00148806	0.0179057	0.000824059	0.000798332	0.000143277	0.000884954	0.000172894	0.000724409	0.000186788	0.000185652	0.000259206	0.00491839	0.000985896	0.000154354	0.00411918	0.000976699	0.000138084	0.00025157	0.000182578	0.0036164	0.0020579	0.00200578	0.00199995	0.000859146	0.000221124	0.000232066	0.000237528
	PSE_94_05M	SRF	PSE	0.00567449	0.000151164	1.34163	0.00586668	0.000942954	1.33126	0.00775941	0.00688034	0.0091152	0.0183249	0.0107129	0.00066057	0.0113769	0.00399943	0.00959211	0.00327486	0.0074969	0.00570107	0.00250395	0.00764316	0.00317406	0.002761	0.00270442	0.527772	0.0144438	0.0131786	0.0139561	0.00702865	0.000151572	0.000155384	0.000182841
	PSE_96_05M	SRF	PSE	0.327564	0.000117079	1.3537	0.173653	0.000912606	1.35843	0.0379795	0.0356623	0.0368071	0.184047	0.143907	0.000170123	0.138383	0.276543	0.170857	0.000608211	0.0931955	0.087536	0.000660882	0.382663	0.0628058	0.0676114	0.0660774	0.0898743	0.000285785	0.000235626	0.000544888	0.393349	0.000109519	0.000112018	0.000105622
	PSE_98_05M	SRF	PSE	1.03567	0.000120894	0.0687545	0.558879	0.000754373	0.0618645	0.1209	0.111523	0.115556	0.565246	0.459014	0.000218249	0.4354	0.90442	0.574592	0.000585346	0.313136	0.297822	0.000699586	1.13201	0.201813	0.216296	0.210179	0.0380495	0.000372488	0.00025446	0.000597381	1.14952	0.000111924	0.000117624	0.000129122
	PSE_99_05M	SRF	PSE	1.14284	0.000162878	0.869398	0.705153	0.000724175	0.872903	0.24845	0.233668	0.237525	1.04239	0.917788	0.000310864	0.875517	1.13577	0.937333	0.00050176	0.523799	0.501025	0.000572221	1.1115	0.25467	0.278996	0.267289	0.0689154	0.00107716	0.000573053	0.00261249	1.13605	0.000145027	0.000149174	0.000153282
	PSW_112_05M	SRF	PSW	1.22479	0.000254071	0.122077	0.766697	0.000774391	0.116805	0.250771	0.232534	0.239855	0.873641	0.695325	0.000466774	0.660779	1.09368	1.0576	0.000687512	0.607569	0.581142	0.0007004	1.2798	0.270798	0.293953	0.284232	0.111784	0.0602134	0.0592819	0.0613697	1.2945	0.000221611	0.000202789	0.00026474
	PSW_122_05M	SRF	PSW	0.0115231	0.000726982	0.0173538	0.0109922	0.00162059	0.0125317	0.010269	0.0094095	0.00967038	0.0206956	0.0175029	0.00185473	0.0150956	0.0102618	0.0440377	0.00114305	0.0343431	0.00843671	0.00113516	0.01108	0.00785646	0.00892725	0.00925961	0.0351677	0.0214891	0.0206585	0.0267838	0.0161717	0.000756255	0.000754215	0.000981291
	PSW_123_05M	SRF	PSW	0.000572222	0.000382796	0.00190334	0.000590652	0.00151178	0.00061523	0.00102692	0.00099001	0.000522096	0.00140736	0.00079388	0.00141712	0.000727278	0.000625081	0.00221393	0.00827908	0.00339343	0.000483686	0.00711175	0.00126187	0.000452484	0.000586652	0.000561298	0.00160864	0.00175159	0.00155831	0.00414746	0.00123792	0.000366195	0.000358876	0.000396033
	PSW_124_05M	SRF	PSW	0.0092928	0.000883123	0.0141445	0.00895801	0.00219529	0.00979319	0.00864957	0.00779229	0.00769878	0.0165807	0.0142259	0.00316333	0.0128568	0.00869956	0.0361521	0.0117296	0.0263959	0.0069658	0.00986629	0.00916433	0.00645627	0.00720512	0.00732946	0.0287626	0.015544	0.0150719	0.0182225	0.0123286	0.000953057	0.000932963	0.00105409
	PSW_125_05M	SRF	PSW	0.00527017	0.000517244	0.00853329	0.00534167	0.00146534	0.00611016	0.00533066	0.00477117	0.004651	0.00958182	0.00891589	0.0016799	0.00782952	0.00552128	0.0210577	0.0054283	0.0163547	0.00428479	0.00458471	0.00562025	0.0038498	0.00449628	0.00451019	0.0177157	0.00788875	0.0074907	0.00890247	0.00714091	0.000582513	0.000558478	0.000658689
	PSW_128_05M	SRF	PSW	0.0327288	0.000725992	0.0158889	0.0257534	0.00166114	0.0109267	0.0288035	0.025542	0.0261886	0.0358389	0.0531124	0.00182085	0.0507623	0.0291989	0.0605944	0.0023459	0.040813	0.0198306	0.00252533	0.030881	0.0124344	0.0138498	0.0135028	0.0311928	0.0408154	0.0404367	0.0463857	0.033303	0.000749294	0.000689084	0.000968827
	PSW_128_40M	DCM	PSW	0.0281722	0.000556023	0.0119862	0.0240911	0.00118497	0.00851702	0.0321937	0.0293061	0.0297804	0.0350128	0.0602449	0.00142978	0.0576567	0.0267298	0.0553501	0.00183045	0.0370973	0.0208756	0.00181809	0.0267336	0.0113122	0.0127203	0.0123044	0.0258455	0.0371217	0.0367649	0.0424297	0.0288634	0.000567454	0.000533012	0.000673664
	RED_31_05M	SRF	RED	3.15894	0.000426695	0.0365356	1.35936	0.00105232	0.0275506	0.183437	0.174215	0.181753	0.891351	0.833269	0.00116287	0.819363	2.53542	1.07279	0.00424719	0.563632	0.529784	0.00352249	3.03857	0.492021	0.515455	0.509347	0.0211399	0.025573	0.0236202	0.0269945	3.00754	0.000399587	0.000367868	0.000436138
	RED_32_05M	SRF	RED	2.83564	0.00021138	0.0331818	1.19483	0.000628757	0.0215357	0.156118	0.147572	0.154341	0.784444	0.732348	0.000607215	0.719539	2.2242	0.951358	0.00181301	0.49698	0.464538	0.00143698	2.68932	0.432929	0.451287	0.450393	0.0150814	0.00737712	0.00561882	0.0132714	2.68384	0.000213899	0.000198213	0.000216988
	RED_32_80M	DCM	RED	0.179219	0.00269697	0.00433293	0.0791956	0.00340252	0.00304653	0.0145031	0.0139633	0.014173	0.0548859	0.0501499	0.00839811	0.0498747	0.143201	0.0795539	0.117205	0.0440993	0.0407591	0.190444	0.18027	0.0299016	0.031007	0.0298924	0.00295506	0.142081	0.141212	0.146959	0.173755	0.00224689	0.00218487	0.00278525
	RED_33_05M	SRF	RED	0.966309	0.000682759	0.00717648	0.424792	0.00171937	0.0048492	0.0589343	0.0558259	0.0588207	0.278055	0.256043	0.00371625	0.254249	0.789427	0.366202	0.021026	0.181123	0.171775	0.0169204	0.893204	0.152898	0.161441	0.159472	0.00352174	0.0029959	0.0018078	0.00229197	0.878192	0.000653079	0.000652045	0.000733506
	RED_34_05M	SRF	RED	0.552281	0.000377638	0.00395074	0.2396	0.00138481	0.0026314	0.0346469	0.0326181	0.0342137	0.159313	0.146162	0.00218013	0.144934	0.444696	0.21155	0.0125424	0.103675	0.0988472	0.0100874	0.50815	0.0885398	0.0919645	0.0914416	0.00215409	0.00165637	0.000898773	0.00122928	0.499966	0.000422514	0.000408358	0.000460371
	RED_34_60M	DCM	RED	0.0017946	0.00204751	0.000758698	0.00132088	0.00239946	0.000395259	0.000865706	0.000825671	0.000701488	0.0014613	0.000909215	0.00921705	0.000862139	0.00157735	0.00303757	0.168368	0.00203535	0.00156793	0.268148	0.00195593	0.00049192	0.000597221	0.000544226	0.000593069	0.0310343	0.0305303	0.0324376	0.00187126	0.00175105	0.00169725	0.00201402
	SOC_84_05M	SRF	SOC	6.69973e-05	0.000169846	0.000619863	0.000127551	0.00111266	7.59286e-05	0.000460609	0.000468332	5.99057e-05	0.000633158	7.25489e-05	0.000187362	7.22029e-05	0.000161532	9.69861e-05	0.00124133	0.000541955	7.99908e-05	0.0014094	0.000593247	5.93763e-05	0.000145993	9.92057e-05	6.94865e-05	0.000333833	0.000276643	0.000318976	0.000568077	0.000176351	0.000129874	0.000138702
	SOC_85_05M	SRF	SOC	9.55877e-05	0.000156445	0.000976563	0.000121758	0.00140313	0.000120794	0.000633115	0.000640957	6.81713e-05	0.000801118	8.41912e-05	0.000207086	8.13293e-05	0.000210751	0.000118301	0.00155472	0.000708194	0.000107359	0.00175034	0.000738759	7.53589e-05	0.000191722	0.000139546	0.00011323	0.000396366	0.000356876	0.000522766	0.000735949	0.000166445	0.000150598	0.000156226
	SOC_85_90M	DCM	SOC	7.39677e-05	0.000117402	0.000841001	9.75946e-05	0.00104861	0.000102621	0.000516225	0.000510639	6.10017e-05	0.000639374	7.35127e-05	0.0001328	7.32093e-05	0.000181839	7.99865e-05	0.0012596	0.00055612	7.61263e-05	0.00133733	0.000592177	6.48565e-05	0.000141636	9.19814e-05	8.95862e-05	0.000332245	0.000336964	0.000219518	0.000577489	0.000128285	0.000109564	0.000118692
	Relative distribution (corrected by 50% detection	Depth_Id	Location	AS9601	SS120	EQPAC1	GP2	LG	MED4	MIT9107	MIT9116	MIT9123	MIT9201	MIT9202	MIT9211	MIT9215	MIT9301	MIT9302	MIT9303	MIT9311	MIT9312	MIT9313	MIT9314	MIT9321	MIT9322	MIT9401	MIT9515	NATL1A	NATL2A	PAC1	SB	SS2	SS35	SS51
	ANE_004_05M	SRF	ANE	0	0	4.04571	0	0	4.03607	0	0	0	0	0	0	0	0	0.0456606	0	0.0230945	0.0171339	0	0	0	0	0	0.152836	0.150387	0.141478	0.125699	0	0	0	0
	ANE_004_40M	DCM	ANE	0	0	0.951313	0	0	0.948412	0	0	0	0	0	0	0	0	0.0232929	0	0.0118712	0.00835488	0	0	0	0	0	0.0464846	1.24856	1.18041	1.03675	0	0	0	0
	ANE_150_05M	SRF	ANE	0.0742817	0	2.33279	0.0471826	0	2.32461	0.0183332	0.0177007	0.0183941	0.0415542	0.0319214	0	0.0324447	0.0665099	0.125121	0	0.0541633	0.0491268	0	0.089807	0.0165126	0.0175544	0.0172101	0.142048	0.313976	0.298226	0.259873	0.0754	0	0	0
	ANE_150_40M	DCM	ANE	0.104416	0	1.99456	0.0637212	0	1.97941	0.0236143	0.0225327	0.0236393	0.0533717	0.0412393	0	0.0417273	0.0908134	0.162993	0	0.0718092	0.0653874	0	0.121785	0.0216719	0.023346	0.02235	0.121436	0.289173	0.274054	0.239313	0.104949	0	0	0
	ANE_151_05M	SRF	ANE	0.0161233	0	1.86976	0.0124322	0	1.86321	0	0	0	0.0123662	0	0	0	0.0168642	0.0335606	0	0.0197286	0.01404	0	0.024952	0	0	0	0.0939825	0.065454	0.0616523	0.0548352	0.018384	0	0	0
	ANE_151_80M	DCM	ANE	0	0	0.47958	0	0	0.476724	0	0	0	0	0	0	0	0	0	0.020095	0	0	0	0	0	0	0	0.0271901	0.111282	0.104878	0.0924536	0	0	0	0
	ANE_152_05M	SRF	ANE	0	0	1.40226	0	0	1.39467	0	0	0	0	0	0	0	0	0	0	0	0	0	0	0	0	0	0.088595	0.231762	0.219386	0.209015	0	0	0	0
	ANW_141_05M	SRF	ANW	0.342174	0	0	0.116888	0	0	0	0	0	0.0692161	0.0725388	0	0.0707011	0.24914	0.080024	0	0.0412369	0.039382	0	0.340649	0.0459938	0.0477656	0.0476739	0	0	0	0	0.340192	0	0	0
	ANW_142_05M	SRF	ANW	1.12703	0	0	0.407098	0	0	0.0464927	0.0444241	0.045802	0.245596	0.25558	0	0.250291	0.868849	0.294024	0	0.148393	0.140438	0	1.14164	0.157462	0.163318	0.163876	0	0	0	0	1.0959	0	0	0
	ANW_145_05M	SRF	ANW	0	0	0	0	0	0	0	0	0	0	0	0	0	0	0	0	0	0	0	0	0	0	0	0	0	0	0	0	0	0	0
	ANW_146_05M	SRF	ANW	0.148257	0	0	0.0584716	0	0	0	0	0	0.0376617	0.0365631	0	0.0361778	0.119694	0.06259	0	0.0305567	0.0294395	0	0.149334	0.0220916	0.022867	0.022845	0	0.080069	0.0743888	0.0601253	0.140434	0	0	0
	ANW_148_05M	SRF	ANW	0.318197	0	0.0137657	0.123055	0	0.011975	0.0200638	0.0186441	0.0192173	0.0789017	0.0765609	0	0.075489	0.249606	0.122027	0	0.0595633	0.0572371	0	0.322422	0.0470435	0.0490814	0.0486214	0	0.0595248	0.0565403	0.0455733	0.307968	0	0	0
	ANW_149_05M	SRF	ANW	0.0489693	0	0.0753733	0.0267413	0	0.0739611	0	0	0	0.0215856	0.0172725	0	0.0172759	0.042913	0.0594613	0	0.0271016	0.025856	0	0.0516637	0	0.0103086	0.00995522	0	0.0668136	0.0620262	0.0506623	0.046699	0	0	0
	ASE_66_05M	SRF	ASE	0	0	0.169366	0	0	0.168806	0	0	0	0	0	0	0	0	0	0	0	0	0	0	0	0	0	0	0.0791184	0.0751129	0.0650738	0	0	0	0
	ASE_66_30M	DCM	ASE	0	0	0.23365	0	0	0.234054	0	0	0	0	0	0	0	0	0	0	0	0	0	0	0	0	0	0	0.105383	0.0990961	0.0878691	0	0	0	0
	ASE_67_05M	SRF	ASE	0	0	0	0	0	0	0	0	0	0	0	0	0	0	0	0	0	0	0	0	0	0	0	0	0	0	0	0	0	0	0
	ASE_68_05M	SRF	ASE	0	0	2.97315	0	0	2.96407	0	0	0	0	0	0	0	0	0	0	0	0	0	0	0	0	0	0.141366	1.11214	1.06146	0.916364	0	0	0	0
	ASE_68_50M	DCM	ASE	0	0	2.96356	0	0	2.96097	0	0	0	0	0	0	0	0	0	0	0	0	0	0	0	0	0	0.13792	1.37256	1.31112	1.13285	0	0	0	0
	ASE_70_05M	SRF	ASE	0.0311771	0	0.222682	0.0194841	0	0.219236	0.020623	0.0194401	0.0198192	0.0275949	0.0327588	0	0.0322971	0.0262062	0.0322414	0	0.0191137	0.017323	0	0.0307005	0	0	0	0.0755027	0.899781	0.875167	0.774993	0.0288424	0	0	0
	ASW_72_05M	SRF	ASW	1.33985	0	0.0202195	0.629592	0	0	0.113261	0.107772	0.11104	0.534991	0.436373	0	0.429534	1.0433	0.5623	0	0.303594	0.283597	0	1.27847	0.238451	0.250336	0.247882	0	0.0103687	0.0099213	0.013417	1.32854	0	0	0
	ASW_72_100M	DCM	ASW	0.0813479	0	0	0.0439674	0	0	0.0211768	0.0196548	0.0203559	0.0403482	0.0333902	0	0.0328251	0.0651693	0.0555745	0	0.0328764	0.0280498	0	0.0793869	0.01619	0.0170758	0.0167486	0	0.506145	0.499565	0.505501	0.0806126	0	0	0
	ASW_76_05M	SRF	ASW	0.899023	0	0.0313825	0.469904	0	0.0275455	0.0846212	0.0798947	0.0815226	0.346167	0.289675	0	0.282068	0.755855	0.437718	0	0.231669	0.22156	0	0.898027	0.15687	0.165959	0.16396	0.0285832	0	0	0	0.921472	0	0	0
	ASW_78_05M	SRF	ASW	1.16264	0	0.942785	0.630885	0	0.941635	0.147705	0.138119	0.141443	0.473663	0.388204	0	0.377817	1.05225	0.851456	0	0.430542	0.415033	0	1.20012	0.209657	0.222589	0.21836	0.169941	0.0629477	0.0570198	0.048796	1.14269	0	0	0
	ASW_82_05M	SRF	ASW	0	0	0	0	0	0	0	0	0	0	0	0	0	0	0	0	0	0	0	0	0	0	0	0	0	0	0	0	0	0	0
	ASW_82_40M	DCM	ASW	0	0	0	0	0	0	0	0	0	0	0	0	0	0	0	0	0	0	0	0	0	0	0	0	0	0	0	0	0	0	0
	ION_36_05M	SRF	ION	0.0396574	0	0	0.0173927	0	0	0	0	0	0	0	0	0	0.0309405	0	0	0	0	0	0.0350193	0	0	0	0	0	0	0	0.0352897	0	0	0
	ION_36_17M	DCM	ION	0.0358672	0	0	0.0156884	0	0	0	0	0	0.0116743	0.0111047	0	0	0.0281093	0.0130204	0	0	0	0	0.0321995	0	0	0	0	0	0	0	0.0313295	0	0	0
	ION_38_05M	SRF	ION	0.95302	0	0	0.415701	0	0	0.0679796	0.0648549	0.0674893	0.312728	0.291539	0	0.294971	0.740359	0.356249	0	0.188448	0.178101	0	0.837513	0.167407	0.174852	0.172162	0	0	0	0	0.83053	0	0	0
	ION_38_25M	DCM	ION	0.741016	0	0	0.338255	0	0	0.062727	0.0601841	0.0633004	0.255487	0.234909	0	0.238962	0.589092	0.311137	0	0.170531	0.161384	0	0.649644	0.13204	0.137378	0.132915	0	0	0	0	0.641931	0	0	0
	ION_39_25M	DCM	ION	1.11862	0	0	0.497895	0	0	0.0779492	0.0755513	0.0798026	0.35322	0.303537	0	0.306124	0.87829	0.434392	0	0.234024	0.22051	0	1.00975	0.183128	0.191447	0.18312	0	0	0	0	1.02208	0	0	0
	ION_41_05M	SRF	ION	2.6984	0	0	1.07331	0	0	0.132904	0.126378	0.132061	0.71566	0.65394	0	0.640341	2.04998	0.788839	0	0.417038	0.388753	0	2.39797	0.400874	0.417203	0.415156	0	0	0	0	2.5756	0	0	0
	ION_41_60M	DCM	ION	0.169103	0	0	0.103112	0	0	0.0503479	0.0466888	0.0500788	0.104069	0.0741363	0	0.0731125	0.13888	0.201504	0	0.114785	0.10524	0	0.155951	0.0404237	0.0443345	0.0397703	0	0.0224213	0.0218972	0.0271722	0.158826	0	0	0
	ION_42_05M	SRF	ION	2.23165	0	0	0.864301	0	0	0.102112	0.0971195	0.101079	0.556585	0.529546	0	0.515777	1.64248	0.6094	0	0.322961	0.300115	0	1.99444	0.322302	0.335072	0.334006	0	0	0	0	2.17714	0	0	0
	ION_42_80M	DCM	ION	0.269737	0	0	0.149369	0	0	0.0628519	0.0591868	0.0627853	0.145223	0.105747	0	0.102513	0.216771	0.2509	0	0.14604	0.127927	0	0.251352	0.0578235	0.0629355	0.0574095	0	0.0189581	0.0183249	0.0283033	0.2641	0	0	0
	ION_45_05M	SRF	ION	4.12693	0	0	1.6042	0	0	0.186938	0.18086	0.186947	1.04922	0.9963	0	0.9791	3.11721	1.09767	0	0.572421	0.54124	0	3.69181	0.602835	0.628647	0.626222	0	0	0	0	4.05818	0	0	0
	ION_48_05M	SRF	ION	3.87513	0	0	1.46526	0	0	0.16605	0.161353	0.166227	1.0049	0.962923	0	0.941979	2.94306	0.949896	0	0.504551	0.476454	0	3.51817	0.556728	0.578828	0.579042	0	0	0	0	4.02933	0	0	0
	IOS_52_05M	SRF	IOS	0.244455	0	0	0.129553	0	0	0.0529185	0.0488597	0.0487302	0.163754	0.171314	0	0.165657	0.191596	0.209333	0	0.132891	0.0830529	0	0.226463	0.0594933	0.0635401	0.0623115	0	0.0157226	0.0150214	0.018328	0.252101	0	0	0
	IOS_52_75M	DCM	IOS	0.371352	0	0	0.198265	0	0	0.0865442	0.0814881	0.0834964	0.239718	0.227777	0	0.223448	0.30111	0.261424	0	0.15136	0.136564	0	0.354459	0.0778575	0.0832136	0.0799118	0	0.780773	0.780843	0.805654	0.36445	0	0	0
	IOS_56_05M	SRF	IOS	2.23393	0	0	0.983832	0	0	0.148838	0.141132	0.146587	0.712186	0.636218	0	0.626262	1.72754	0.817885	0	0.430277	0.401783	0	2.01538	0.363789	0.38199	0.375249	0	0	0	0	2.14661	0	0	0
	IOS_57_05M	SRF	IOS	1.51961	0	0	0.664084	0	0	0.0978285	0.095545	0.0989639	0.450648	0.40112	0	0.397473	1.19407	0.560127	0	0.295451	0.276285	0	1.39272	0.240358	0.251674	0.242497	0	0	0	0	1.46539	0	0	0
	IOS_58_66M	DCM	IOS	1.74215	0	0	0.726306	0	0	0.107001	0.102853	0.107529	0.503016	0.446267	0	0.442881	1.30738	0.610616	0	0.326207	0.304303	0	1.59156	0.270728	0.28251	0.275141	0	0.0682283	0.0668822	0.0790258	1.68406	0	0	0
	IOS_62_05M	SRF	IOS	1.62465	0	0	0.699718	0	0	0.100527	0.0953471	0.0995791	0.470222	0.414295	0	0.408092	1.2347	0.5835	0	0.306033	0.286203	0	1.45014	0.252811	0.262932	0.26111	0	0	0	0	1.53626	0	0	0
	IOS_64_05M	SRF	IOS	2.18133	0	0.0260638	1.02842	0	0.0211259	0.164142	0.156631	0.161012	0.7066	0.620251	0	0.615526	1.75608	0.924881	0	0.487617	0.466035	0	2.04444	0.365731	0.383552	0.38036	0.0235386	0.0421841	0.0407712	0.0401755	2.08473	0	0	0
	IOS_64_65M	DCM	IOS	0.76097	0	0	0.368443	0	0	0.0624582	0.0592081	0.0612105	0.251694	0.219245	0	0.219565	0.618507	0.344671	0	0.184355	0.171658	0	0.724247	0.131528	0.138141	0.134877	0	0.0344444	0.0330574	0.0336426	0.725363	0	0	0
	IOS_65_05M	SRF	IOS	0.27056	0	0	0.122293	0	0	0	0	0	0.0823292	0.0728436	0	0.0722329	0.210068	0.109404	0	0.0594257	0.0554467	0	0.246471	0.0436977	0.0460772	0.0456332	0	0.0100129	0.00934864	0	0.254009	0	0	0
	IOS_65_30M	DCM	IOS	0.140992	0	0	0.0667759	0	0	0	0	0	0.046982	0.0407185	0	0.0405308	0.111775	0.0593031	0	0.0327127	0.0293635	0	0.13232	0.0251035	0.0263939	0.0255811	0	0	0	0	0.134451	0	0	0
	MED_18_05M	SRF	MED	0	0	4.33978	0	0	4.34421	0	0	0	0	0	0	0	0	0	0	0	0	0	0	0	0	0	0.160888	0.298876	0.28549	0.243794	0	0	0	0
	MED_18_60M	DCM	MED	0	0	4.97376	0	0	4.97302	0	0	0	0	0	0	0	0	0	0	0	0	0	0	0	0	0	0.171517	0.347661	0.331214	0.28255	0	0	0	0
	MED_23_05M	SRF	MED	0	0	0.438109	0	0	0.432023	0	0	0	0	0	0	0	0	0	0	0	0	0	0	0	0	0	0	0.0992208	0.0969049	0.0821864	0	0	0	0
	MED_25_05M	SRF	MED	0	0	0.647731	0	0	0.652402	0	0	0	0	0	0	0	0	0	0	0	0	0	0	0	0	0	0	0.221362	0.214954	0.179709	0	0	0	0
	MED_25_50M	DCM	MED	0	0	1.6301	0	0	1.63681	0	0	0	0	0	0	0	0	0	0.0915526	0	0	0.0290827	0	0	0	0	0	3.32978	3.21757	2.7025	0	0	0	0
	MED_30_05M	SRF	MED	0	0	0.381877	0	0	0.385133	0	0	0	0	0	0	0	0	0	0	0	0	0	0	0	0	0	0	0.0114679	0.0134239	0.0110027	0	0	0	0
	MED_30_70M	DCM	MED	0	0	2.91987	0	0	2.93753	0	0	0	0	0	0	0	0	0	0	0	0	0	0	0	0	0	0	0.215249	0.215727	0.178266	0	0	0	0
	PON_132_05M	SRF	PON	2.46454	0	0.114045	1.13457	0	0.106641	0.166925	0.157667	0.163489	0.745618	0.702283	0	0.674488	2.14099	0.888678	0	0.448067	0.425072	0	2.54718	0.383552	0.402818	0.401032	0.0362237	0	0	0	2.64033	0	0	0
	PON_133_05M	SRF	PON	0	0	2.11121	0	0	2.09808	0	0	0	0	0	0	0	0	0	0	0	0	0	0	0	0	0	0.201791	0.0611746	0.0579727	0.0606191	0	0	0	0
	PON_133_45M	DCM	PON	0	0	0.177148	0	0	0.173846	0	0	0	0	0	0	0	0	0	0	0	0	0	0	0	0	0	0	0.51098	0.487478	0.489083	0	0	0	0
	PON_137_05M	SRF	PON	0.164345	0	0	0.0953715	0	0	0.0504451	0.0458945	0.0466838	0.117937	0.138904	0	0.132626	0.161727	0.139323	0	0.0853658	0.0633938	0	0.152676	0.041792	0.0448436	0.0432327	0	0	0	0	0.152339	0	0	0
	PON_137_40M	DCM	PON	0	0	0	0	0	0	0	0	0	0	0	0	0	0	0	0.0654188	0	0	0.046092	0	0	0	0	0	0	0	0	0	0	0	0
	PON_138_05M	SRF	PON	1.77214	0	0	0.85857	0	0	0.195031	0.183687	0.188717	1.08593	1.05101	0	1.01496	1.42377	0.879409	0	0.478511	0.44597	0	1.69612	0.35035	0.369683	0.361985	0	0	0	0	1.73449	0	0	0
	PON_138_60M	DCM	PON	0	0	0	0	0	0	0.00872531	0.00812452	0.00831422	0	0	0	0	0	0.0237462	0	0	0	0	0	0	0	0	0	0.586292	0.580392	0.586398	0	0	0	0
	PON_140_05M	SRF	PON	0.929187	0	0	0.399585	0	0	0.0576939	0.0541895	0.0567515	0.265361	0.246907	0	0.243704	0.747752	0.325414	0	0.173244	0.162903	0	0.808252	0.147414	0.154247	0.151729	0	0	0	0	0.829519	0	0	0
	PSE_100_05M	SRF	PSE	0	0	0	0	0	0	0	0	0	0	0	0	0	0	0	0	0	0	0	0	0	0	0	0	0	0	0	0	0	0	0
	PSE_100_50M	DCM	PSE	0	0	0.0529923	0	0	0.0488044	0	0	0	0	0	0	0	0	0	0	0	0	0	0	0	0	0	0.0531035	1.91957	1.8691	1.75594	0	0	0	0
	PSE_102_05M	SRF	PSE	0.0416744	0	0.0311855	0.0285709	0	0.0268163	0.0207775	0.0187837	0.0193961	0.0366643	0.038887	0	0.0364738	0.0338817	0.0597996	0	0.0388989	0.0266308	0	0.039257	0	0.0145364	0	0.0384028	0.0114825	0.0111184	0.0156573	0.0387538	0	0	0
	PSE_102_40M	DCM	PSE	0.0194775	0	0.0567213	0.0148642	0	0.0530321	0.0118884	0.0108237	0.0113176	0.0192783	0.0184992	0	0.0177052	0.0161629	0.0353904	0	0.0219998	0.0174142	0	0.0199384	0	0	0	0.0626643	0.851136	0.842863	0.804545	0.0181625	0	0	0
	PSE_109_05M	SRF	PSE	0.314621	0	0	0.150519	0	0	0.0489003	0.0453153	0.0464083	0.164038	0.167855	0	0.162035	0.251717	0.174701	0	0.0993275	0.0837081	0	0.294014	0.0656524	0.0684788	0.0676434	0	0	0	0	0.295621	0	0	0
	PSE_109_30M	DCM	PSE	0.0307302	0	0	0.0209697	0	0	0.0232901	0.0212282	0.0212909	0.0286509	0.0315593	0	0.0292892	0.0256888	0.049119	0	0.037198	0.0170417	0	0.0298635	0	0	0	0	0.0165478	0.0163879	0.025903	0.0317721	0	0	0
	PSE_110_05M	SRF	PSE	0.0533609	0	0	0.0371876	0	0	0.0606746	0.0547002	0.0562944	0.0481602	0.053869	0	0.052086	0.0445672	0.0751474	0	0.0480611	0.0344198	0	0.0500662	0.0160222	0.0176195	0.0170851	0.0323001	0.115864	0.115372	0.12018	0.0499209	0	0	0
	PSE_110_50M	DCM	PSE	0.0181406	0	0	0.013434	0	0	0.0210838	0.0196088	0.0199283	0.0173405	0.0188177	0	0.0184596	0.0154374	0.0294904	0	0.0208279	0.0124212	0	0.0184239	0	0	0	0.016069	0.383453	0.385271	0.392564	0.017899	0	0	0
	PSE_111_05M	SRF	PSE	0	0	0	0	0	0	0	0	0	0	0	0	0	0	0	0	0	0	0	0	0	0	0	0	0.058477	0.0575334	0.0633464	0	0	0	0
	PSE_111_90M	DCM	PSE	0	0	0.0138416	0	0	0.0114094	0	0	0	0	0	0	0	0	0	0	0	0	0	0	0	0	0	0.0168139	1.77851	1.74595	1.68215	0	0	0	0
	PSE_93_05M	SRF	PSE	0	0	0.203604	0	0	0.204676	0	0	0	0	0	0	0	0	0	0	0	0	0	0	0	0	0	0.0391633	0	0	0	0	0	0	0
	PSE_93_35M	DCM	PSE	0	0	0.0188332	0	0	0.0179057	0	0	0	0	0	0	0	0	0	0	0	0	0	0	0	0	0	0	0	0	0	0	0	0	0
	PSE_94_05M	SRF	PSE	0	0	1.34163	0	0	1.33126	0	0	0	0	0	0	0	0	0	0	0	0	0	0	0	0	0	0.527772	0.0144438	0.0131786	0.0139561	0	0	0	0
	PSE_96_05M	SRF	PSE	0.327564	0	1.3537	0.173653	0	1.35843	0.0379795	0.0356623	0.0368071	0.184047	0.143907	0	0.138383	0.276543	0.170857	0	0.0931955	0.087536	0	0.382663	0.0628058	0.0676114	0.0660774	0.0898743	0	0	0	0.393349	0	0	0
	PSE_98_05M	SRF	PSE	1.03567	0	0.0687545	0.558879	0	0.0618645	0.1209	0.111523	0.115556	0.565246	0.459014	0	0.4354	0.90442	0.574592	0	0.313136	0.297822	0	1.13201	0.201813	0.216296	0.210179	0.0380495	0	0	0	1.14952	0	0	0
	PSE_99_05M	SRF	PSE	1.14284	0	0.869398	0.705153	0	0.872903	0.24845	0.233668	0.237525	1.04239	0.917788	0	0.875517	1.13577	0.937333	0	0.523799	0.501025	0	1.1115	0.25467	0.278996	0.267289	0.0689154	0	0	0	1.13605	0	0	0
	PSW_112_05M	SRF	PSW	1.22479	0	0.122077	0.766697	0	0.116805	0.250771	0.232534	0.239855	0.873641	0.695325	0	0.660779	1.09368	1.0576	0	0.607569	0.581142	0	1.2798	0.270798	0.293953	0.284232	0.111784	0.0602134	0.0592819	0.0613697	1.2945	0	0	0
	PSW_122_05M	SRF	PSW	0	0	0	0	0	0	0	0	0	0	0	0	0	0	0	0	0	0	0	0	0	0	0	0	0.0214891	0.0206585	0.0267838	0	0	0	0
	PSW_123_05M	SRF	PSW	0	0	0	0	0	0	0	0	0	0	0	0	0	0	0	0	0	0	0	0	0	0	0	0	0	0	0	0	0	0	0
	PSW_124_05M	SRF	PSW	0	0	0	0	0	0	0	0	0	0	0	0	0	0	0	0	0	0	0	0	0	0	0	0	0	0	0	0	0	0	0
	PSW_125_05M	SRF	PSW	0	0	0	0	0	0	0	0	0	0	0	0	0	0	0	0	0	0	0	0	0	0	0	0	0	0	0	0	0	0	0
	PSW_128_05M	SRF	PSW	0.0327288	0	0	0.0257534	0	0	0.0288035	0.025542	0.0261886	0.0358389	0.0531124	0	0.0507623	0.0291989	0.0605944	0	0.040813	0.0198306	0	0.030881	0	0	0	0	0.0408154	0.0404367	0.0463857	0.033303	0	0	0
	PSW_128_40M	DCM	PSW	0.0281722	0	0	0.0240911	0	0	0.0321937	0.0293061	0.0297804	0.0350128	0.0602449	0	0.0576567	0.0267298	0.0553501	0	0.0370973	0.0208756	0	0.0267336	0	0	0	0	0.0371217	0.0367649	0.0424297	0.0288634	0	0	0
	RED_31_05M	SRF	RED	3.15894	0	0	1.35936	0	0	0.183437	0.174215	0.181753	0.891351	0.833269	0	0.819363	2.53542	1.07279	0	0.563632	0.529784	0	3.03857	0.492021	0.515455	0.509347	0	0.025573	0.0236202	0.0269945	3.00754	0	0	0
	RED_32_05M	SRF	RED	2.83564	0	0	1.19483	0	0	0.156118	0.147572	0.154341	0.784444	0.732348	0	0.719539	2.2242	0.951358	0	0.49698	0.464538	0	2.68932	0.432929	0.451287	0.450393	0	0	0	0	2.68384	0	0	0
	RED_32_80M	DCM	RED	0.179219	0	0	0.0791956	0	0	0	0	0	0.0548859	0.0501499	0	0.0498747	0.143201	0.0795539	0.117205	0.0440993	0.0407591	0.190444	0.18027	0.0299016	0.031007	0.0298924	0	0.142081	0.141212	0.146959	0.173755	0	0	0
	RED_33_05M	SRF	RED	0.966309	0	0	0.424792	0	0	0.0589343	0.0558259	0.0588207	0.278055	0.256043	0	0.254249	0.789427	0.366202	0	0.181123	0.171775	0	0.893204	0.152898	0.161441	0.159472	0	0	0	0	0.878192	0	0	0
	RED_34_05M	SRF	RED	0.552281	0	0	0.2396	0	0	0.0346469	0.0326181	0.0342137	0.159313	0.146162	0	0.144934	0.444696	0.21155	0	0.103675	0.0988472	0	0.50815	0.0885398	0.0919645	0.0914416	0	0	0	0	0.499966	0	0	0
	RED_34_60M	DCM	RED	0	0	0	0	0	0	0	0	0	0	0	0	0	0	0	0.168368	0	0	0.268148	0	0	0	0	0	0.0310343	0.0305303	0.0324376	0	0	0	0
	SOC_84_05M	SRF	SOC	0	0	0	0	0	0	0	0	0	0	0	0	0	0	0	0	0	0	0	0	0	0	0	0	0	0	0	0	0	0	0
	SOC_85_05M	SRF	SOC	0	0	0	0	0	0	0	0	0	0	0	0	0	0	0	0	0	0	0	0	0	0	0	0	0	0	0	0	0	0	0
	SOC_85_90M	DCM	SOC	0	0	0	0	0	0	0	0	0	0	0	0	0	0	0	0	0	0	0	0	0	0	0	0	0	0	0	0	0	0	0
	Occurrence (when detection >50%)	Depth_Id	Location	AS9601	SS120	EQPAC1	GP2	LG	MED4	MIT9107	MIT9116	MIT9123	MIT9201	MIT9202	MIT9211	MIT9215	MIT9301	MIT9302	MIT9303	MIT9311	MIT9312	MIT9313	MIT9314	MIT9321	MIT9322	MIT9401	MIT9515	NATL1A	NATL2A	PAC1	SB	SS2	SS35	SS51
	ANE_004_05M	SRF	ANE	0	0	1	0	0	1	0	0	0	0	0	0	0	0	1	0	1	1	0	0	0	0	0	1	1	1	1	0	0	0	0
	ANE_004_40M	DCM	ANE	0	0	1	0	0	1	0	0	0	0	0	0	0	0	1	0	1	1	0	0	0	0	0	1	1	1	1	0	0	0	0
	ANE_150_05M	SRF	ANE	1	0	1	1	0	1	1	1	1	1	1	0	1	1	1	0	1	1	0	1	1	1	1	1	1	1	1	1	0	0	0
	ANE_150_40M	DCM	ANE	1	0	1	1	0	1	1	1	1	1	1	0	1	1	1	0	1	1	0	1	1	1	1	1	1	1	1	1	0	0	0
	ANE_151_05M	SRF	ANE	1	0	1	1	0	1	0	0	0	1	0	0	0	1	1	0	1	1	0	1	0	0	0	1	1	1	1	1	0	0	0
	ANE_151_80M	DCM	ANE	0	0	1	0	0	1	0	0	0	0	0	0	0	0	0	1	0	0	0	0	0	0	0	1	1	1	1	0	0	0	0
	ANE_152_05M	SRF	ANE	0	0	1	0	0	1	0	0	0	0	0	0	0	0	0	0	0	0	0	0	0	0	0	1	1	1	1	0	0	0	0
	ANW_141_05M	SRF	ANW	1	0	0	1	0	0	0	0	0	1	1	0	1	1	1	0	1	1	0	1	1	1	1	0	0	0	0	1	0	0	0
	ANW_142_05M	SRF	ANW	1	0	0	1	0	0	1	1	1	1	1	0	1	1	1	0	1	1	0	1	1	1	1	0	0	0	0	1	0	0	0
	ANW_145_05M	SRF	ANW	0	0	0	0	0	0	0	0	0	0	0	0	0	0	0	0	0	0	0	0	0	0	0	0	0	0	0	0	0	0	0
	ANW_146_05M	SRF	ANW	1	0	0	1	0	0	0	0	0	1	1	0	1	1	1	0	1	1	0	1	1	1	1	0	1	1	1	1	0	0	0
	ANW_148_05M	SRF	ANW	1	0	1	1	0	1	1	1	1	1	1	0	1	1	1	0	1	1	0	1	1	1	1	0	1	1	1	1	0	0	0
	ANW_149_05M	SRF	ANW	1	0	1	1	0	1	0	0	0	1	1	0	1	1	1	0	1	1	0	1	0	1	1	0	1	1	1	1	0	0	0
	ASE_66_05M	SRF	ASE	0	0	1	0	0	1	0	0	0	0	0	0	0	0	0	0	0	0	0	0	0	0	0	0	1	1	1	0	0	0	0
	ASE_66_30M	DCM	ASE	0	0	1	0	0	1	0	0	0	0	0	0	0	0	0	0	0	0	0	0	0	0	0	0	1	1	1	0	0	0	0
	ASE_67_05M	SRF	ASE	0	0	0	0	0	0	0	0	0	0	0	0	0	0	0	0	0	0	0	0	0	0	0	0	0	0	0	0	0	0	0
	ASE_68_05M	SRF	ASE	0	0	1	0	0	1	0	0	0	0	0	0	0	0	0	0	0	0	0	0	0	0	0	1	1	1	1	0	0	0	0
	ASE_68_50M	DCM	ASE	0	0	1	0	0	1	0	0	0	0	0	0	0	0	0	0	0	0	0	0	0	0	0	1	1	1	1	0	0	0	0
	ASE_70_05M	SRF	ASE	1	0	1	1	0	1	1	1	1	1	1	0	1	1	1	0	1	1	0	1	0	0	0	1	1	1	1	1	0	0	0
	ASW_72_05M	SRF	ASW	1	0	1	1	0	0	1	1	1	1	1	0	1	1	1	0	1	1	0	1	1	1	1	0	1	1	1	1	0	0	0
	ASW_72_100M	DCM	ASW	1	0	0	1	0	0	1	1	1	1	1	0	1	1	1	0	1	1	0	1	1	1	1	0	1	1	1	1	0	0	0
	ASW_76_05M	SRF	ASW	1	0	1	1	0	1	1	1	1	1	1	0	1	1	1	0	1	1	0	1	1	1	1	1	0	0	0	1	0	0	0
	ASW_78_05M	SRF	ASW	1	0	1	1	0	1	1	1	1	1	1	0	1	1	1	0	1	1	0	1	1	1	1	1	1	1	1	1	0	0	0
	ASW_82_05M	SRF	ASW	0	0	0	0	0	0	0	0	0	0	0	0	0	0	0	0	0	0	0	0	0	0	0	0	0	0	0	0	0	0	0
	ASW_82_40M	DCM	ASW	0	0	0	0	0	0	0	0	0	0	0	0	0	0	0	0	0	0	0	0	0	0	0	0	0	0	0	0	0	0	0
	ION_36_05M	SRF	ION	1	0	0	1	0	0	0	0	0	0	0	0	0	1	0	0	0	0	0	1	0	0	0	0	0	0	0	1	0	0	0
	ION_36_17M	DCM	ION	1	0	0	1	0	0	0	0	0	1	1	0	0	1	1	0	0	0	0	1	0	0	0	0	0	0	0	1	0	0	0
	ION_38_05M	SRF	ION	1	0	0	1	0	0	1	1	1	1	1	0	1	1	1	0	1	1	0	1	1	1	1	0	0	0	0	1	0	0	0
	ION_38_25M	DCM	ION	1	0	0	1	0	0	1	1	1	1	1	0	1	1	1	0	1	1	0	1	1	1	1	0	0	0	0	1	0	0	0
	ION_39_25M	DCM	ION	1	0	0	1	0	0	1	1	1	1	1	0	1	1	1	0	1	1	0	1	1	1	1	0	0	0	0	1	0	0	0
	ION_41_05M	SRF	ION	1	0	0	1	0	0	1	1	1	1	1	0	1	1	1	0	1	1	0	1	1	1	1	0	0	0	0	1	0	0	0
	ION_41_60M	DCM	ION	1	0	0	1	0	0	1	1	1	1	1	0	1	1	1	0	1	1	0	1	1	1	1	0	1	1	1	1	0	0	0
	ION_42_05M	SRF	ION	1	0	0	1	0	0	1	1	1	1	1	0	1	1	1	0	1	1	0	1	1	1	1	0	0	0	0	1	0	0	0
	ION_42_80M	DCM	ION	1	0	0	1	0	0	1	1	1	1	1	0	1	1	1	0	1	1	0	1	1	1	1	0	1	1	1	1	0	0	0
	ION_45_05M	SRF	ION	1	0	0	1	0	0	1	1	1	1	1	0	1	1	1	0	1	1	0	1	1	1	1	0	0	0	0	1	0	0	0
	ION_48_05M	SRF	ION	1	0	0	1	0	0	1	1	1	1	1	0	1	1	1	0	1	1	0	1	1	1	1	0	0	0	0	1	0	0	0
	IOS_52_05M	SRF	IOS	1	0	0	1	0	0	1	1	1	1	1	0	1	1	1	0	1	1	0	1	1	1	1	0	1	1	1	1	0	0	0
	IOS_52_75M	DCM	IOS	1	0	0	1	0	0	1	1	1	1	1	0	1	1	1	0	1	1	0	1	1	1	1	0	1	1	1	1	0	0	0
	IOS_56_05M	SRF	IOS	1	0	0	1	0	0	1	1	1	1	1	0	1	1	1	0	1	1	0	1	1	1	1	0	0	0	0	1	0	0	0
	IOS_57_05M	SRF	IOS	1	0	0	1	0	0	1	1	1	1	1	0	1	1	1	0	1	1	0	1	1	1	1	0	0	0	0	1	0	0	0
	IOS_58_66M	DCM	IOS	1	0	0	1	0	0	1	1	1	1	1	0	1	1	1	0	1	1	0	1	1	1	1	0	1	1	1	1	0	0	0
	IOS_62_05M	SRF	IOS	1	0	0	1	0	0	1	1	1	1	1	0	1	1	1	0	1	1	0	1	1	1	1	0	0	0	0	1	0	0	0
	IOS_64_05M	SRF	IOS	1	0	1	1	0	1	1	1	1	1	1	0	1	1	1	0	1	1	0	1	1	1	1	1	1	1	1	1	0	0	0
	IOS_64_65M	DCM	IOS	1	0	0	1	0	0	1	1	1	1	1	0	1	1	1	0	1	1	0	1	1	1	1	0	1	1	1	1	0	0	0
	IOS_65_05M	SRF	IOS	1	0	0	1	0	0	0	0	0	1	1	0	1	1	1	0	1	1	0	1	1	1	1	0	1	1	0	1	0	0	0
	IOS_65_30M	DCM	IOS	1	0	0	1	0	0	0	0	0	1	1	0	1	1	1	0	1	1	0	1	1	1	1	0	0	0	0	1	0	0	0
	MED_18_05M	SRF	MED	0	0	1	0	0	1	0	0	0	0	0	0	0	0	0	0	0	0	0	0	0	0	0	1	1	1	1	0	0	0	0
	MED_18_60M	DCM	MED	0	0	1	0	0	1	0	0	0	0	0	0	0	0	0	0	0	0	0	0	0	0	0	1	1	1	1	0	0	0	0
	MED_23_05M	SRF	MED	0	0	1	0	0	1	0	0	0	0	0	0	0	0	0	0	0	0	0	0	0	0	0	0	1	1	1	0	0	0	0
	MED_25_05M	SRF	MED	0	0	1	0	0	1	0	0	0	0	0	0	0	0	0	0	0	0	0	0	0	0	0	0	1	1	1	0	0	0	0
	MED_25_50M	DCM	MED	0	0	1	0	0	1	0	0	0	0	0	0	0	0	0	1	0	0	1	0	0	0	0	0	1	1	1	0	0	0	0
	MED_30_05M	SRF	MED	0	0	1	0	0	1	0	0	0	0	0	0	0	0	0	0	0	0	0	0	0	0	0	0	1	1	1	0	0	0	0
	MED_30_70M	DCM	MED	0	0	1	0	0	1	0	0	0	0	0	0	0	0	0	0	0	0	0	0	0	0	0	0	1	1	1	0	0	0	0
	PON_132_05M	SRF	PON	1	0	1	1	0	1	1	1	1	1	1	0	1	1	1	0	1	1	0	1	1	1	1	1	0	0	0	1	0	0	0
	PON_133_05M	SRF	PON	0	0	1	0	0	1	0	0	0	0	0	0	0	0	0	0	0	0	0	0	0	0	0	1	1	1	1	0	0	0	0
	PON_133_45M	DCM	PON	0	0	1	0	0	1	0	0	0	0	0	0	0	0	0	0	0	0	0	0	0	0	0	0	1	1	1	0	0	0	0
	PON_137_05M	SRF	PON	1	0	0	1	0	0	1	1	1	1	1	0	1	1	1	0	1	1	0	1	1	1	1	0	0	0	0	1	0	0	0
	PON_137_40M	DCM	PON	0	0	0	0	0	0	0	0	0	0	0	0	0	0	0	1	0	0	1	0	0	0	0	0	0	0	0	0	0	0	0
	PON_138_05M	SRF	PON	1	0	0	1	0	0	1	1	1	1	1	0	1	1	1	0	1	1	0	1	1	1	1	0	0	0	0	1	0	0	0
	PON_138_60M	DCM	PON	0	0	0	0	0	0	1	1	1	0	0	0	0	0	1	0	0	0	0	0	0	0	0	0	1	1	1	0	0	0	0
	PON_140_05M	SRF	PON	1	0	0	1	0	0	1	1	1	1	1	0	1	1	1	0	1	1	0	1	1	1	1	0	0	0	0	1	0	0	0
	PSE_100_05M	SRF	PSE	0	0	0	0	0	0	0	0	0	0	0	0	0	0	0	0	0	0	0	0	0	0	0	0	0	0	0	0	0	0	0
	PSE_100_50M	DCM	PSE	0	0	1	0	0	1	0	0	0	0	0	0	0	0	0	0	0	0	0	0	0	0	0	1	1	1	1	0	0	0	0
	PSE_102_05M	SRF	PSE	1	0	1	1	0	1	1	1	1	1	1	0	1	1	1	0	1	1	0	1	0	1	0	1	1	1	1	1	0	0	0
	PSE_102_40M	DCM	PSE	1	0	1	1	0	1	1	1	1	1	1	0	1	1	1	0	1	1	0	1	0	0	0	1	1	1	1	1	0	0	0
	PSE_109_05M	SRF	PSE	1	0	0	1	0	0	1	1	1	1	1	0	1	1	1	0	1	1	0	1	1	1	1	0	0	0	0	1	0	0	0
	PSE_109_30M	DCM	PSE	1	0	0	1	0	0	1	1	1	1	1	0	1	1	1	0	1	1	0	1	0	0	0	0	1	1	1	1	0	0	0
	PSE_110_05M	SRF	PSE	1	0	0	1	0	0	1	1	1	1	1	0	1	1	1	0	1	1	0	1	1	1	1	1	1	1	1	1	0	0	0
	PSE_110_50M	DCM	PSE	1	0	0	1	0	0	1	1	1	1	1	0	1	1	1	0	1	1	0	1	0	0	0	1	1	1	1	1	0	0	0
	PSE_111_05M	SRF	PSE	0	0	0	0	0	0	0	0	0	0	0	0	0	0	0	0	0	0	0	0	0	0	0	0	1	1	1	0	0	0	0
	PSE_111_90M	DCM	PSE	0	0	1	0	0	1	0	0	0	0	0	0	0	0	0	0	0	0	0	0	0	0	0	1	1	1	1	0	0	0	0
	PSE_93_05M	SRF	PSE	0	0	1	0	0	1	0	0	0	0	0	0	0	0	0	0	0	0	0	0	0	0	0	1	0	0	0	0	0	0	0
	PSE_93_35M	DCM	PSE	0	0	1	0	0	1	0	0	0	0	0	0	0	0	0	0	0	0	0	0	0	0	0	0	0	0	0	0	0	0	0
	PSE_94_05M	SRF	PSE	0	0	1	0	0	1	0	0	0	0	0	0	0	0	0	0	0	0	0	0	0	0	0	1	1	1	1	0	0	0	0
	PSE_96_05M	SRF	PSE	1	0	1	1	0	1	1	1	1	1	1	0	1	1	1	0	1	1	0	1	1	1	1	1	0	0	0	1	0	0	0
	PSE_98_05M	SRF	PSE	1	0	1	1	0	1	1	1	1	1	1	0	1	1	1	0	1	1	0	1	1	1	1	1	0	0	0	1	0	0	0
	PSE_99_05M	SRF	PSE	1	0	1	1	0	1	1	1	1	1	1	0	1	1	1	0	1	1	0	1	1	1	1	1	0	0	0	1	0	0	0
	PSW_112_05M	SRF	PSW	1	0	1	1	0	1	1	1	1	1	1	0	1	1	1	0	1	1	0	1	1	1	1	1	1	1	1	1	0	0	0
	PSW_122_05M	SRF	PSW	0	0	0	0	0	0	0	0	0	0	0	0	0	0	0	0	0	0	0	0	0	0	0	0	1	1	1	0	0	0	0
	PSW_123_05M	SRF	PSW	0	0	0	0	0	0	0	0	0	0	0	0	0	0	0	0	0	0	0	0	0	0	0	0	0	0	0	0	0	0	0
	PSW_124_05M	SRF	PSW	0	0	0	0	0	0	0	0	0	0	0	0	0	0	0	0	0	0	0	0	0	0	0	0	0	0	0	0	0	0	0
	PSW_125_05M	SRF	PSW	0	0	0	0	0	0	0	0	0	0	0	0	0	0	0	0	0	0	0	0	0	0	0	0	0	0	0	0	0	0	0
	PSW_128_05M	SRF	PSW	1	0	0	1	0	0	1	1	1	1	1	0	1	1	1	0	1	1	0	1	0	0	0	0	1	1	1	1	0	0	0
	PSW_128_40M	DCM	PSW	1	0	0	1	0	0	1	1	1	1	1	0	1	1	1	0	1	1	0	1	0	0	0	0	1	1	1	1	0	0	0
	RED_31_05M	SRF	RED	1	0	0	1	0	0	1	1	1	1	1	0	1	1	1	0	1	1	0	1	1	1	1	0	1	1	1	1	0	0	0
	RED_32_05M	SRF	RED	1	0	0	1	0	0	1	1	1	1	1	0	1	1	1	0	1	1	0	1	1	1	1	0	0	0	0	1	0	0	0
	RED_32_80M	DCM	RED	1	0	0	1	0	0	0	0	0	1	1	0	1	1	1	1	1	1	1	1	1	1	1	0	1	1	1	1	0	0	0
	RED_33_05M	SRF	RED	1	0	0	1	0	0	1	1	1	1	1	0	1	1	1	0	1	1	0	1	1	1	1	0	0	0	0	1	0	0	0
	RED_34_05M	SRF	RED	1	0	0	1	0	0	1	1	1	1	1	0	1	1	1	0	1	1	0	1	1	1	1	0	0	0	0	1	0	0	0
	RED_34_60M	DCM	RED	0	0	0	0	0	0	0	0	0	0	0	0	0	0	0	1	0	0	1	0	0	0	0	0	1	1	1	0	0	0	0
	SOC_84_05M	SRF	SOC	0	0	0	0	0	0	0	0	0	0	0	0	0	0	0	0	0	0	0	0	0	0	0	0	0	0	0	0	0	0	0
	SOC_85_05M	SRF	SOC	0	0	0	0	0	0	0	0	0	0	0	0	0	0	0	0	0	0	0	0	0	0	0	0	0	0	0	0	0	0	0
	SOC_85_90M	DCM	SOC	0	0	0	0	0	0	0	0	0	0	0	0	0	0	0	0	0	0	0	0	0	0	0	0	0	0	0	0	0	0	0
	Detection (i.e., portion of the genome covered)	Depth_Id	Location	AS9601	SS120	EQPAC1	GP2	LG	MED4	MIT9107	MIT9116	MIT9123	MIT9201	MIT9202	MIT9211	MIT9215	MIT9301	MIT9302	MIT9303	MIT9311	MIT9312	MIT9313	MIT9314	MIT9321	MIT9322	MIT9401	MIT9515	NATL1A	NATL2A	PAC1	SB	SS2	SS35	SS51
	ANE_004_05M	SRF	ANE	0.386923	0.00579325	0.953163	0.328358	0.00985618	0.953614	0.27621	0.271929	0.269073	0.338046	0.268121	0.00816778	0.294009	0.350982	0.793656	0.0223975	0.534911	0.532605	0.0183324	0.379896	0.193507	0.199267	0.189616	0.751675	0.933415	0.947661	0.925422	0.370256	0.0093244	0.00684426	0.00579781
	ANE_004_40M	DCM	ANE	0.297319	0.014733	0.944693	0.27563	0.0196292	0.94497	0.258237	0.246471	0.248675	0.276854	0.213246	0.0156097	0.226504	0.271671	0.780368	0.286996	0.522218	0.521839	0.122399	0.289559	0.150762	0.159644	0.154092	0.654092	0.976715	0.987749	0.969989	0.285948	0.0193565	0.0167482	0.0148742
	ANE_150_05M	SRF	ANE	0.883563	0.00809556	0.954889	0.757108	0.0118502	0.95408	0.577742	0.567718	0.57695	0.741825	0.683497	0.0126719	0.694063	0.879951	0.950768	0.0940618	0.859447	0.867752	0.0553692	0.875125	0.610489	0.617944	0.614252	0.761296	0.950342	0.970055	0.946276	0.871251	0.010815	0.00752751	0.0090002
	ANE_150_40M	DCM	ANE	0.90175	0.0074311	0.95185	0.788379	0.00941496	0.952647	0.61012	0.610214	0.616483	0.770356	0.719783	0.0111097	0.72465	0.900806	0.950686	0.0406671	0.886773	0.889898	0.0302161	0.887714	0.65267	0.66013	0.657934	0.739186	0.951478	0.96675	0.941118	0.889944	0.00885187	0.00654898	0.00727906
	ANE_151_05M	SRF	ANE	0.664366	0.00481319	0.947014	0.53738	0.004893	0.948196	0.339155	0.332019	0.32939	0.507749	0.433317	0.00689908	0.442255	0.636767	0.755615	0.0207561	0.604552	0.597622	0.0182475	0.673457	0.325948	0.341354	0.333611	0.723837	0.900947	0.899694	0.863222	0.65664	0.00497037	0.00350231	0.00505556
	ANE_151_80M	DCM	ANE	0.287149	0.0345134	0.93775	0.236554	0.0400803	0.940103	0.131026	0.130304	0.121943	0.219734	0.16719	0.0523127	0.17516	0.267091	0.424736	0.753062	0.274128	0.266226	0.414942	0.294093	0.108743	0.113107	0.110067	0.588538	0.926442	0.930642	0.897466	0.29184	0.0330537	0.0364798	0.0359465
	ANE_152_05M	SRF	ANE	0.0932321	0.00564032	0.947374	0.0852798	0.00963551	0.947638	0.0769112	0.0831208	0.0763877	0.0936725	0.0768607	0.00827654	0.101001	0.0825875	0.159793	0.0278866	0.11371	0.103101	0.023957	0.0966359	0.0527588	0.0542894	0.0518501	0.687213	0.932069	0.94454	0.924992	0.0921432	0.00860684	0.00732552	0.00689731
	ANW_141_05M	SRF	ANW	0.906445	0.00385194	0.0853279	0.703885	0.00393233	0.0691371	0.353106	0.349405	0.355273	0.67259	0.683961	0.00556526	0.668783	0.928823	0.67858	0.0358061	0.594738	0.592033	0.0331623	0.916158	0.613089	0.612771	0.62301	0.0410458	0.0109528	0.00941953	0.0112951	0.905636	0.00389022	0.00367245	0.00443455
	ANW_142_05M	SRF	ANW	0.934272	0.00403797	0.331318	0.816013	0.00406039	0.318687	0.559761	0.563253	0.555924	0.809885	0.823867	0.00599801	0.801031	0.955783	0.905595	0.0276296	0.819028	0.819905	0.0304352	0.957513	0.76554	0.770166	0.767446	0.170235	0.24363	0.230797	0.230819	0.92908	0.00335171	0.00354499	0.00446786
	ANW_145_05M	SRF	ANW	0.22033	0.00294061	0.0329927	0.0917698	0.00308923	0.0240616	0.0164094	0.0144082	0.0142359	0.0559107	0.0595641	0.00450248	0.0525697	0.184719	0.0747981	0.0208752	0.0436151	0.0400186	0.0178817	0.211155	0.0377593	0.038336	0.039725	0.00484969	0.0761476	0.0662939	0.0604255	0.211483	0.00279667	0.00273598	0.00362666
	ANW_146_05M	SRF	ANW	0.892735	0.00420133	0.35543	0.707185	0.00433854	0.343274	0.43062	0.42533	0.428105	0.659886	0.664934	0.00516531	0.64214	0.925716	0.867654	0.0223828	0.76394	0.771587	0.021358	0.902525	0.589458	0.591862	0.592425	0.148695	0.925238	0.921561	0.870753	0.874633	0.00462931	0.00337297	0.00484985
	ANW_148_05M	SRF	ANW	0.910021	0.00408825	0.656719	0.759041	0.00463129	0.644377	0.513327	0.512777	0.52076	0.716606	0.727072	0.00621241	0.714192	0.935165	0.891476	0.0331391	0.805135	0.807296	0.0330795	0.92776	0.670977	0.672423	0.673424	0.204179	0.906395	0.905348	0.857344	0.899521	0.00403749	0.00369788	0.0050393
	ANW_149_05M	SRF	ANW	0.832114	0.00380085	0.926427	0.664777	0.00433353	0.932582	0.446867	0.442691	0.4448	0.61636	0.579257	0.00561321	0.573667	0.849343	0.901103	0.027911	0.780035	0.787297	0.0267954	0.825619	0.493885	0.507844	0.503138	0.496038	0.902618	0.906128	0.854045	0.817674	0.0038671	0.003834	0.00471457
	ASE_66_05M	SRF	ASE	0.241347	0.00330529	0.917335	0.154539	0.00329438	0.920826	0.0712667	0.0715021	0.0664434	0.13893	0.110218	0.00434085	0.11161	0.209802	0.26088	0.0124296	0.171241	0.169129	0.0110875	0.232619	0.0716354	0.0779654	0.0716895	0.464485	0.892514	0.895909	0.85543	0.235646	0.00363771	0.00278689	0.00281323
	ASE_66_30M	DCM	ASE	0.165285	0.00284706	0.911796	0.105772	0.00321268	0.91816	0.049859	0.0468346	0.0472403	0.0939719	0.0755527	0.00387464	0.0727482	0.144828	0.190276	0.0127167	0.124711	0.114863	0.0123229	0.15818	0.0517851	0.0478592	0.0444081	0.415912	0.8626	0.870195	0.828716	0.153822	0.00312174	0.00299356	0.00344044
	ASE_67_05M	SRF	ASE	0.00202819	0.00216406	0.00765302	0.00179485	0.00270187	0.00824274	0.00196095	0.00170139	0.00115504	0.00284852	0.00192969	0.00346807	0.00132203	0.00191408	0.00276967	0.0147724	0.00475033	0.00209751	0.0121047	0.00491217	0.00148236	0.00178566	0.00250813	0.00219894	0.00511505	0.00544429	0.00739516	0.00197886	0.00245151	0.00216742	0.00277634
	ASE_68_05M	SRF	ASE	0.125414	0.008279	0.944641	0.104561	0.0134759	0.947062	0.0851334	0.0889636	0.0791187	0.122485	0.102025	0.0102457	0.11108	0.10697	0.201254	0.0306604	0.134778	0.128863	0.032099	0.118585	0.0718311	0.0734088	0.0714061	0.728621	0.960242	0.973775	0.957584	0.118624	0.0135018	0.00887847	0.00768842
	ASE_68_50M	DCM	ASE	0.112705	0.00948938	0.941754	0.0962966	0.0125095	0.944641	0.0772655	0.0825047	0.0725372	0.113092	0.093431	0.0106235	0.0994982	0.0956386	0.178321	0.0274935	0.129127	0.121009	0.0294038	0.107067	0.0665056	0.0676841	0.0639639	0.702664	0.960088	0.973818	0.956495	0.106682	0.0141646	0.00918193	0.00809415
	ASE_70_05M	SRF	ASE	0.692885	0.00727341	0.914784	0.537854	0.00785661	0.920445	0.738372	0.725942	0.732748	0.632901	0.720845	0.0127818	0.706975	0.676596	0.647987	0.0200655	0.580765	0.573468	0.0159001	0.66618	0.384741	0.405175	0.391402	0.89745	0.960205	0.96974	0.95176	0.666083	0.0079694	0.0069692	0.00795266
	ASW_72_05M	SRF	ASW	0.954058	0.00505216	0.501786	0.933389	0.00522211	0.487063	0.856993	0.859202	0.865349	0.969835	0.940653	0.0086099	0.938234	0.981366	0.917956	0.0112682	0.897952	0.902552	0.0115365	0.961518	0.898656	0.894844	0.897826	0.479394	0.596211	0.592224	0.578251	0.970039	0.00551919	0.00455215	0.00601203
	ASW_72_100M	DCM	ASW	0.88087	0.0789773	0.373242	0.733153	0.0924477	0.359733	0.791079	0.779574	0.79418	0.800969	0.755288	0.115011	0.741953	0.883407	0.794106	0.0108772	0.740906	0.736869	0.0106354	0.863776	0.609645	0.61451	0.619321	0.347134	0.955709	0.96543	0.96329	0.877771	0.0765666	0.0779152	0.0800302
	ASW_76_05M	SRF	ASW	0.938445	0.0036634	0.695927	0.902523	0.00394042	0.685843	0.696194	0.706582	0.70212	0.914983	0.84582	0.00634856	0.843795	0.950874	0.885212	0.0118915	0.87499	0.877086	0.013196	0.928869	0.842731	0.842768	0.8448	0.537881	0.0456086	0.0422181	0.0394807	0.96273	0.00334511	0.00305452	0.00400531
	ASW_78_05M	SRF	ASW	0.948847	0.00659292	0.951939	0.931262	0.00796114	0.951211	0.785691	0.793952	0.796843	0.933557	0.8842	0.0104462	0.883182	0.968443	0.983624	0.0253797	0.959446	0.960669	0.0236056	0.954181	0.880267	0.875916	0.879796	0.786035	0.890649	0.875427	0.832923	0.950318	0.00713797	0.00607055	0.00745838
	ASW_82_05M	SRF	ASW	0.0290198	0.00163988	0.00410858	0.0177558	0.00206968	0.00384356	0.00555143	0.00440568	0.00345352	0.0187227	0.014237	0.0023282	0.0132794	0.0258182	0.0197204	0.00377305	0.0114499	0.0106566	0.00337626	0.0340014	0.00760431	0.00733219	0.00876192	0.00273346	0.0021071	0.00209744	0.00665059	0.031084	0.00175764	0.00170832	0.00153687
	ASW_82_40M	DCM	ASW	0.00701355	0.00187967	0.00476465	0.00446003	0.00206215	0.00314884	0.00280427	0.0022514	0.00195431	0.00482405	0.00317734	0.00196878	0.00373528	0.00657956	0.0058357	0.00374732	0.00588747	0.00246983	0.00321616	0.00778683	0.0024127	0.00259698	0.00378167	0.00191899	0.00648012	0.0063807	0.010812	0.00664322	0.00188183	0.00172023	0.00197101
	ION_36_05M	SRF	ION	0.759742	0.00286093	0.0205724	0.503735	0.00299967	0.0148914	0.183596	0.178758	0.180737	0.460398	0.4434	0.00420863	0.434513	0.727647	0.474231	0.0245094	0.380088	0.367031	0.0226712	0.71102	0.363138	0.36599	0.368673	0.0154986	0.00368273	0.00311251	0.00717582	0.725791	0.00290852	0.00264304	0.00341476
	ION_36_17M	DCM	ION	0.800687	0.00356857	0.0271689	0.548959	0.00382039	0.0175839	0.217484	0.220159	0.215523	0.506442	0.500863	0.00453473	0.489696	0.774821	0.523816	0.0273459	0.440223	0.427568	0.0258133	0.750276	0.420431	0.427112	0.418731	0.017953	0.00449994	0.00412407	0.00923351	0.762164	0.00345707	0.00318021	0.00360029
	ION_38_05M	SRF	ION	0.934523	0.0033877	0.115004	0.842417	0.00378295	0.103851	0.666557	0.66851	0.669416	0.885737	0.864058	0.0063377	0.838304	0.939506	0.857174	0.0294212	0.825986	0.826381	0.0278086	0.902952	0.826078	0.829925	0.831819	0.117974	0.0298856	0.0314328	0.0365391	0.917886	0.00389772	0.00350829	0.00454931
	ION_38_25M	DCM	ION	0.939622	0.00495758	0.237628	0.863168	0.00485184	0.226761	0.746516	0.740398	0.746199	0.886799	0.880391	0.00898348	0.859943	0.943347	0.8833	0.0436358	0.864495	0.866177	0.0406259	0.905609	0.853375	0.854385	0.855648	0.241671	0.265222	0.265519	0.260012	0.918836	0.00508242	0.00458295	0.00555346
	ION_39_25M	DCM	ION	0.946418	0.00371552	0.173248	0.900863	0.00450176	0.157562	0.660274	0.666775	0.667806	0.929246	0.855138	0.00757769	0.858499	0.953449	0.894704	0.0286749	0.867498	0.874065	0.0272145	0.923253	0.868636	0.866104	0.869073	0.173641	0.0702111	0.067351	0.0669115	0.945463	0.00441932	0.00363568	0.00492323
	ION_41_05M	SRF	ION	0.966884	0.00419612	0.339897	0.987846	0.00509059	0.321622	0.724652	0.731597	0.735595	0.953819	0.899132	0.00790064	0.91714	0.963186	0.926222	0.0179365	0.905258	0.903391	0.0170221	0.962137	0.930843	0.926348	0.929682	0.335021	0.0104584	0.00940729	0.0165832	0.98419	0.00491453	0.00460771	0.00465335
	ION_41_60M	DCM	ION	0.921765	0.056671	0.397963	0.810443	0.0612445	0.389235	0.659033	0.659583	0.662007	0.86682	0.762728	0.230573	0.797397	0.913125	0.87541	0.0479608	0.852161	0.853599	0.0870328	0.901841	0.754331	0.751701	0.748717	0.359221	0.644949	0.655735	0.64249	0.905756	0.0520192	0.0541337	0.060329
	ION_42_05M	SRF	ION	0.96306	0.00492873	0.351855	0.985108	0.00542599	0.337735	0.699982	0.712332	0.711314	0.952264	0.885616	0.0171017	0.898834	0.963612	0.920814	0.0107233	0.888336	0.887834	0.0110059	0.969801	0.893225	0.891861	0.895424	0.356959	0.0503815	0.0530689	0.0557145	0.98394	0.00449261	0.00406624	0.00610724
	ION_42_80M	DCM	ION	0.936211	0.0476794	0.380704	0.8703	0.047949	0.372231	0.652091	0.653476	0.651099	0.903725	0.804817	0.33861	0.830451	0.936069	0.869256	0.0148389	0.829442	0.829162	0.0200501	0.922373	0.77037	0.769083	0.772611	0.370501	0.62671	0.634002	0.627929	0.927472	0.0432451	0.0422405	0.0478161
	ION_45_05M	SRF	ION	0.989052	0.00404173	0.289163	0.994648	0.00450529	0.277646	0.744569	0.749652	0.750047	0.972161	0.914269	0.00833645	0.923884	0.960578	0.918158	0.0140314	0.894311	0.896097	0.0136708	0.959868	0.918832	0.913812	0.917746	0.281314	0.00969707	0.00971393	0.0133358	0.999322	0.00419749	0.00385594	0.00492225
	ION_48_05M	SRF	ION	0.987632	0.00393015	0.286458	0.983915	0.00377209	0.271558	0.763752	0.776078	0.775131	0.986949	0.933287	0.00721584	0.94613	0.960192	0.919176	0.00657804	0.88894	0.893981	0.00774323	0.983331	0.912762	0.909694	0.914279	0.278427	0.00967751	0.00830911	0.0152271	0.999993	0.00398957	0.0038392	0.00410126
	IOS_52_05M	SRF	IOS	0.935376	0.0151118	0.217425	0.818814	0.0157811	0.20346	0.75394	0.748646	0.755861	0.957937	0.930221	0.023896	0.921256	0.926084	0.852201	0.0179569	0.828896	0.832783	0.017488	0.90177	0.790569	0.799403	0.797405	0.221964	0.505722	0.520372	0.506137	0.930716	0.0146116	0.014796	0.0159843
	IOS_52_75M	DCM	IOS	0.936987	0.0262335	0.41485	0.851587	0.0269745	0.398754	0.900775	0.904045	0.913428	0.965047	0.934984	0.0437792	0.928629	0.934497	0.891944	0.0196779	0.872871	0.875953	0.0175234	0.909646	0.834562	0.838651	0.839135	0.406083	0.95512	0.974809	0.953298	0.935529	0.0266302	0.0259018	0.0257358
	IOS_56_05M	SRF	IOS	0.965184	0.00912239	0.362406	0.978095	0.0101701	0.348969	0.782152	0.781112	0.788035	0.981159	0.947492	0.0193314	0.941267	0.959892	0.93891	0.0228016	0.913081	0.914975	0.0278959	0.938269	0.893726	0.888755	0.893689	0.371138	0.40551	0.413218	0.416437	0.980758	0.00888399	0.00873735	0.00962367
	IOS_57_05M	SRF	IOS	0.960384	0.00561742	0.278263	0.958881	0.00627407	0.262333	0.70836	0.715309	0.715681	0.958072	0.896718	0.0110045	0.888911	0.956936	0.923002	0.0374991	0.892737	0.896781	0.0378768	0.930663	0.876716	0.875765	0.877856	0.276721	0.359397	0.359686	0.360041	0.971283	0.00538504	0.00579171	0.00654119
	IOS_58_66M	DCM	IOS	0.95807	0.0140768	0.358342	0.956425	0.0154572	0.343387	0.749887	0.755542	0.755094	0.962759	0.898331	0.0296091	0.89235	0.959627	0.941598	0.0448443	0.913742	0.913325	0.0619127	0.932826	0.883791	0.882216	0.883963	0.355755	0.820303	0.833668	0.825172	0.968352	0.0140929	0.0130002	0.0156014
	IOS_62_05M	SRF	IOS	0.959427	0.0049057	0.306888	0.967158	0.00468837	0.293364	0.689299	0.696953	0.698411	0.941895	0.878621	0.00767822	0.87616	0.95694	0.926498	0.0232852	0.894204	0.896538	0.0224372	0.929632	0.867163	0.862403	0.861537	0.321164	0.352634	0.348126	0.346484	0.970281	0.0046467	0.00417678	0.00458602
	IOS_64_05M	SRF	IOS	0.970363	0.00640274	0.646628	0.977882	0.00620101	0.637048	0.823447	0.828044	0.832756	0.971611	0.922078	0.0109254	0.94895	0.96702	0.984446	0.025216	0.965662	0.966146	0.0235356	0.952242	0.912263	0.909488	0.912477	0.55401	0.872833	0.878031	0.84898	0.973662	0.00652497	0.00638326	0.00736777
	IOS_64_65M	DCM	IOS	0.945696	0.00619927	0.420488	0.912313	0.00580504	0.413935	0.69324	0.691935	0.695206	0.917512	0.852039	0.00924453	0.855545	0.949907	0.93305	0.0313617	0.910137	0.910945	0.0307247	0.924111	0.835712	0.838754	0.836277	0.370721	0.79707	0.799768	0.767229	0.950485	0.00589553	0.00523998	0.00608752
	IOS_65_05M	SRF	IOS	0.915988	0.00409744	0.194222	0.806472	0.00394407	0.180641	0.483352	0.47944	0.480104	0.7866	0.722843	0.0062722	0.711338	0.922304	0.831683	0.025604	0.777969	0.779111	0.0293809	0.891172	0.688402	0.692248	0.693528	0.180226	0.511453	0.503342	0.47117	0.907718	0.00360717	0.00260047	0.00382109
	IOS_65_30M	DCM	IOS	0.902816	0.00572732	0.161339	0.778339	0.00537848	0.147796	0.445601	0.451705	0.444925	0.750373	0.700107	0.00830212	0.692538	0.909922	0.79441	0.337273	0.736807	0.728189	0.293849	0.87862	0.661536	0.667971	0.662577	0.158822	0.483875	0.475386	0.446191	0.897914	0.00512749	0.00501392	0.00558394
	MED_18_05M	SRF	MED	0.212642	0.0245272	0.97524	0.166135	0.0317468	0.976872	0.122743	0.133385	0.121716	0.171735	0.145779	0.0231377	0.155463	0.18343	0.279424	0.399729	0.208015	0.197628	0.161999	0.23347	0.103793	0.106697	0.0995981	0.745832	0.943352	0.955674	0.920313	0.218052	0.0286163	0.0235609	0.0259578
	MED_18_60M	DCM	MED	0.191566	0.0081406	0.976761	0.14765	0.0110569	0.977834	0.115388	0.123342	0.111003	0.16182	0.135228	0.00841793	0.14865	0.161945	0.263534	0.0251313	0.197031	0.182135	0.0145389	0.219502	0.0989367	0.0968949	0.0939028	0.743159	0.948153	0.959763	0.926259	0.194681	0.00986202	0.00743022	0.0065619
	MED_23_05M	SRF	MED	0.0170571	0.00247617	0.934104	0.0107115	0.0029594	0.936954	0.00876216	0.00928373	0.00846826	0.0159508	0.0129294	0.00336631	0.0159903	0.0158576	0.031737	0.013335	0.0216663	0.0168208	0.0115306	0.022915	0.00886216	0.00728374	0.0083164	0.111153	0.815229	0.828793	0.76516	0.0184975	0.00262181	0.00288252	0.00252917
	MED_25_05M	SRF	MED	0.0345241	0.00412733	0.950284	0.0225772	0.0057576	0.952654	0.0219036	0.0275581	0.0218323	0.0285872	0.027822	0.00606906	0.0345714	0.0287957	0.0605867	0.0294154	0.0382031	0.032384	0.026861	0.0507574	0.0179871	0.0170588	0.0171756	0.226215	0.934742	0.946274	0.904985	0.032916	0.00589036	0.00410125	0.0044252
	MED_25_50M	DCM	MED	0.0550712	0.0845885	0.957202	0.0374612	0.0944908	0.95876	0.0383102	0.0439779	0.0386998	0.0434712	0.0438779	0.117717	0.0565859	0.0450315	0.108141	0.896964	0.0642631	0.053402	0.69603	0.0832839	0.0296665	0.0271119	0.0296832	0.377182	0.98375	0.988094	0.974485	0.0483234	0.0840946	0.0832125	0.0836881
	MED_30_05M	SRF	MED	0.136276	0.00280783	0.944575	0.0545136	0.00330498	0.946216	0.016145	0.0183861	0.0161126	0.0405481	0.0411148	0.00398815	0.0422475	0.0920154	0.069529	0.0156075	0.0447335	0.03454	0.0150332	0.133469	0.0293669	0.0325224	0.0309886	0.149297	0.632501	0.644649	0.560401	0.130072	0.00242475	0.00275978	0.00332257
	MED_30_70M	DCM	MED	0.204718	0.00377622	0.957799	0.104159	0.00465344	0.957684	0.0481701	0.0449387	0.0453519	0.0857406	0.0816091	0.0061096	0.0871272	0.158983	0.176001	0.0241771	0.109399	0.0968249	0.0212792	0.243418	0.065295	0.0633926	0.0631197	0.272289	0.917702	0.938665	0.912632	0.238711	0.00406012	0.0036975	0.00433403
	PON_132_05M	SRF	PON	0.951052	0.00266204	0.944698	0.904665	0.00376414	0.943953	0.710788	0.721211	0.723639	0.931658	0.893466	0.00658914	0.903365	0.95769	0.909285	0.00610105	0.875972	0.87694	0.00622846	0.977197	0.869267	0.866355	0.869683	0.619346	0.00980234	0.00822817	0.0118686	0.979844	0.00281216	0.00299591	0.0029928
	PON_133_05M	SRF	PON	0.0986505	0.00522787	0.941975	0.0812143	0.006303	0.943898	0.0743556	0.0838039	0.0718708	0.101392	0.0860696	0.00847452	0.0959822	0.0815333	0.143721	0.0209644	0.115187	0.104825	0.0172456	0.0958666	0.0683778	0.0688853	0.0668319	0.670759	0.839529	0.839928	0.823165	0.104174	0.00573301	0.00427801	0.00550962
	PON_133_45M	DCM	PON	0.0361655	0.00983823	0.910588	0.029008	0.0127086	0.918298	0.0265005	0.0274971	0.0238718	0.0383553	0.0307761	0.0133569	0.0347707	0.0304985	0.0547423	0.0238771	0.0430845	0.0327939	0.0180265	0.03942	0.0198917	0.0200821	0.0211763	0.395005	0.942682	0.955868	0.944411	0.0349588	0.0126993	0.0114642	0.010029
	PON_137_05M	SRF	PON	0.910766	0.011042	0.205849	0.793943	0.0109428	0.196479	0.876167	0.878487	0.880766	0.917861	0.937123	0.0183602	0.920377	0.915246	0.81832	0.0195072	0.797517	0.798937	0.0188009	0.872578	0.732733	0.740922	0.743418	0.349906	0.408768	0.411966	0.397673	0.90107	0.0108456	0.0104417	0.0115818
	PON_137_40M	DCM	PON	0.0194494	0.00527952	0.00360891	0.0145677	0.00693202	0.00261394	0.0114737	0.00850117	0.00866018	0.0150677	0.0163932	0.0114998	0.0153572	0.0212726	0.0169984	0.681772	0.00855476	0.0101039	0.556205	0.018777	0.00728546	0.00706746	0.00633116	0.00468527	0.0351137	0.034756	0.0367238	0.0210564	0.00584922	0.00422773	0.00535329
	PON_138_05M	SRF	PON	0.953181	0.00644183	0.33594	0.899583	0.00637249	0.329118	0.820295	0.830933	0.83418	0.995193	0.980564	0.0110102	0.952568	0.974322	0.907678	0.0103747	0.893034	0.898101	0.0099455	0.931487	0.901126	0.899739	0.904045	0.365988	0.201874	0.19529	0.20636	0.950067	0.00575265	0.00557783	0.00676966
	PON_138_60M	DCM	PON	0.383219	0.0815556	0.385544	0.334513	0.0917934	0.380705	0.542061	0.520427	0.53901	0.370683	0.331553	0.0846265	0.325856	0.356033	0.526182	0.216675	0.437922	0.432068	0.109024	0.361492	0.211765	0.224367	0.208048	0.399172	0.946901	0.969363	0.966053	0.374554	0.0802284	0.0842566	0.082961
	PON_140_05M	SRF	PON	0.943278	0.00378237	0.125389	0.908781	0.00410139	0.105868	0.652958	0.655559	0.655216	0.92461	0.8692	0.00659232	0.856495	0.962194	0.875584	0.0263633	0.856106	0.856282	0.0243811	0.920774	0.851266	0.849144	0.852644	0.122323	0.0168538	0.0175642	0.0253142	0.926256	0.00398349	0.00382912	0.00465822
	PSE_100_05M	SRF	PSE	0.119136	0.0107681	0.144435	0.0975188	0.0111329	0.137406	0.0969421	0.101613	0.0951708	0.137508	0.114711	0.0173557	0.115042	0.0999137	0.133164	0.00903592	0.110914	0.10413	0.00864655	0.103211	0.0839342	0.086558	0.0869862	0.157974	0.466261	0.475854	0.46014	0.110666	0.00972175	0.00960508	0.0111415
	PSE_100_50M	DCM	PSE	0.170902	0.019977	0.775861	0.176253	0.0242488	0.780044	0.27658	0.25677	0.269032	0.201735	0.176946	0.0245659	0.178998	0.163737	0.309795	0.0185864	0.253859	0.237819	0.0152713	0.168137	0.107225	0.115124	0.10532	0.787169	0.97373	0.98181	0.971351	0.165421	0.0240168	0.02255	0.0194802
	PSE_102_05M	SRF	PSE	0.742071	0.00777429	0.623562	0.611712	0.00851244	0.625273	0.688041	0.681497	0.691675	0.670433	0.727745	0.0143359	0.702333	0.703014	0.699677	0.0198497	0.674315	0.672093	0.0186608	0.699439	0.488869	0.507754	0.497569	0.592896	0.574271	0.575374	0.545843	0.712672	0.00834401	0.00825819	0.00919601
	PSE_102_40M	DCM	PSE	0.613587	0.0159073	0.706455	0.519974	0.0168342	0.711912	0.598423	0.57737	0.592617	0.566694	0.583796	0.0243478	0.563208	0.576237	0.652392	0.0443158	0.6203	0.61225	0.0347952	0.588586	0.378617	0.407121	0.393693	0.713494	0.951741	0.974597	0.97435	0.582038	0.0174623	0.0145668	0.0172476
	PSE_109_05M	SRF	PSE	0.931456	0.00880367	0.188566	0.82621	0.00954907	0.166362	0.84795	0.840398	0.852368	0.951544	0.942531	0.0146704	0.924726	0.948768	0.844811	0.023114	0.817174	0.819579	0.0216872	0.895248	0.801769	0.804533	0.800941	0.206497	0.128542	0.133036	0.134676	0.933651	0.0080621	0.00855391	0.00941173
	PSE_109_30M	DCM	PSE	0.765018	0.00975617	0.210645	0.590969	0.00998189	0.199118	0.797726	0.775325	0.797159	0.666874	0.781901	0.0170931	0.760455	0.733249	0.674623	0.0165193	0.611157	0.608207	0.0159131	0.725367	0.442509	0.458558	0.44422	0.268743	0.544848	0.559793	0.541718	0.747993	0.00963974	0.00993182	0.0108613
	PSE_110_05M	SRF	PSE	0.81776	0.0109853	0.497995	0.683695	0.0122883	0.493256	0.891316	0.892185	0.904703	0.739169	0.83128	0.0204202	0.815581	0.795454	0.751449	0.0199697	0.720207	0.716492	0.0186506	0.778156	0.547218	0.560953	0.562208	0.805058	0.874833	0.897295	0.868441	0.80137	0.0124305	0.0117753	0.0134245
	PSE_110_50M	DCM	PSE	0.703706	0.0536696	0.491833	0.567334	0.0565164	0.494187	0.829831	0.819723	0.831574	0.62198	0.713779	0.0845153	0.693873	0.669792	0.663927	0.0203572	0.609514	0.60021	0.0197002	0.671048	0.406021	0.415373	0.413785	0.686032	0.934894	0.96018	0.949273	0.680498	0.0515645	0.0498004	0.0515415
	PSE_111_05M	SRF	PSE	0.149528	0.0131926	0.177823	0.122513	0.0140643	0.165683	0.128291	0.128786	0.124981	0.170946	0.148255	0.0197217	0.150972	0.12954	0.186947	0.0113785	0.149072	0.138221	0.01054	0.134088	0.0942075	0.099108	0.0958169	0.189645	0.840791	0.846206	0.839356	0.131964	0.011977	0.0132532	0.0132518
	PSE_111_90M	DCM	PSE	0.184506	0.0222489	0.558925	0.202379	0.025638	0.555933	0.296826	0.285768	0.293314	0.225571	0.193129	0.0301354	0.193855	0.182017	0.343437	0.0125319	0.280854	0.265027	0.0110983	0.191014	0.112746	0.122016	0.113181	0.640449	0.967641	0.98032	0.971424	0.187264	0.0280965	0.025959	0.0220184
	PSE_93_05M	SRF	PSE	0.0362735	0.00331164	0.873347	0.0292374	0.00384576	0.878667	0.0286216	0.0290746	0.0274273	0.0375598	0.0309509	0.00554339	0.0440663	0.0276431	0.0389003	0.0309858	0.0335233	0.028026	0.0257949	0.0365083	0.0213677	0.0197788	0.0226458	0.520052	0.33408	0.335267	0.332283	0.033679	0.00340486	0.00356362	0.00417962
	PSE_93_35M	DCM	PSE	0.0198592	0.002671	0.743846	0.0124743	0.00304176	0.754184	0.00980137	0.00671631	0.00669443	0.0135701	0.011893	0.00469412	0.0133167	0.0132725	0.0166799	0.0224487	0.015472	0.00836191	0.0185802	0.0199842	0.00673699	0.00667936	0.00731995	0.211322	0.1801	0.177787	0.178142	0.0170946	0.00278272	0.00269396	0.00352623
	PSE_94_05M	SRF	PSE	0.0892328	0.00494758	0.850782	0.0832229	0.00520911	0.856006	0.0881467	0.0878531	0.0847656	0.10093	0.105809	0.00726005	0.120655	0.0679991	0.13053	0.0220672	0.107176	0.0966507	0.0203427	0.0807262	0.0669736	0.0691776	0.0692525	0.650442	0.599359	0.607672	0.596832	0.0906983	0.00514971	0.00423686	0.00521484
	PSE_96_05M	SRF	PSE	0.895673	0.0026796	0.943463	0.747897	0.002424	0.941383	0.564957	0.564607	0.571916	0.862531	0.799047	0.0051672	0.801105	0.886356	0.763119	0.00321453	0.75473	0.756164	0.00339459	0.876764	0.682842	0.693739	0.69483	0.637534	0.0061264	0.00507308	0.00760421	0.890233	0.00218229	0.00198698	0.00246819
	PSE_98_05M	SRF	PSE	0.924675	0.00242429	0.866	0.834309	0.00278359	0.863376	0.685774	0.691116	0.694023	0.916799	0.881126	0.00444882	0.894544	0.932352	0.829249	0.00507816	0.823813	0.830671	0.00548349	0.913117	0.799377	0.803999	0.8041	0.594816	0.00701814	0.00665027	0.00821053	0.922287	0.00202246	0.00216436	0.00250966
	PSE_99_05M	SRF	PSE	0.926746	0.00331272	0.962972	0.864454	0.00335428	0.962269	0.786216	0.797242	0.803587	0.936109	0.932374	0.00551928	0.955733	0.930452	0.876973	0.0031054	0.871359	0.875362	0.00347864	0.899701	0.857074	0.853258	0.859321	0.673265	0.00977151	0.00998801	0.0169876	0.922719	0.00269971	0.00254584	0.00276255
	PSW_112_05M	SRF	PSW	0.949309	0.00842642	0.910329	0.895303	0.00838169	0.908403	0.876249	0.888871	0.892422	0.966345	0.941883	0.0125853	0.940213	0.949427	0.934498	0.00811201	0.928665	0.931026	0.00814692	0.952189	0.892897	0.891544	0.894169	0.773715	0.847803	0.855582	0.83533	0.954473	0.00854622	0.00755563	0.00898354
	PSW_122_05M	SRF	PSW	0.135828	0.0113255	0.115082	0.114505	0.0113485	0.103495	0.106354	0.102875	0.106111	0.150519	0.132045	0.017989	0.132589	0.110632	0.160291	0.0100703	0.131228	0.117923	0.00963807	0.125008	0.0853791	0.0898685	0.0901012	0.132849	0.507724	0.516131	0.512109	0.122899	0.0101829	0.0110987	0.0116172
	PSW_123_05M	SRF	PSW	0.0415235	0.0046852	0.0404551	0.0298238	0.00440922	0.0303039	0.0293551	0.0262485	0.0281223	0.0483899	0.0436082	0.00693854	0.0400288	0.031694	0.0523882	0.0199181	0.0400384	0.0300433	0.0205512	0.03861	0.0231513	0.0276188	0.0262478	0.0494066	0.128084	0.131582	0.137404	0.0414116	0.0041468	0.0046986	0.00530954
	PSW_124_05M	SRF	PSW	0.173125	0.0115132	0.118864	0.138759	0.011994	0.109365	0.126757	0.12483	0.123821	0.186426	0.160733	0.0193033	0.163228	0.150794	0.200567	0.0251625	0.154761	0.145874	0.0260904	0.161624	0.101152	0.106847	0.10308	0.136419	0.473465	0.482272	0.467568	0.15972	0.0117432	0.0121562	0.013021
	PSW_125_05M	SRF	PSW	0.1173	0.00874638	0.0948295	0.0944761	0.0100707	0.0845912	0.0923531	0.0879163	0.0843035	0.127676	0.108752	0.0146569	0.110245	0.0959633	0.137584	0.0233357	0.106997	0.0950173	0.0232977	0.105575	0.0709393	0.0743202	0.0741099	0.111691	0.342329	0.344839	0.344867	0.101688	0.0085561	0.00887043	0.0100347
	PSW_128_05M	SRF	PSW	0.711706	0.011084	0.136033	0.564287	0.0130093	0.125201	0.754629	0.731587	0.75027	0.61497	0.838282	0.0226625	0.818341	0.685843	0.637309	0.0340457	0.563115	0.557668	0.0499199	0.668726	0.389961	0.39946	0.395017	0.153995	0.640342	0.654235	0.635911	0.686637	0.0121695	0.0114286	0.0122057
	PSW_128_40M	DCM	PSW	0.680259	0.0110077	0.134994	0.577535	0.0122696	0.123867	0.81809	0.801951	0.822983	0.642182	0.877704	0.0207744	0.862606	0.673705	0.660891	0.0307027	0.619426	0.612849	0.0394505	0.635855	0.419503	0.432354	0.430655	0.156943	0.653514	0.660928	0.645609	0.648477	0.0113744	0.0110045	0.0116436
	RED_31_05M	SRF	RED	0.96247	0.00837055	0.494852	0.980797	0.00810819	0.488177	0.751867	0.75965	0.76317	0.944092	0.890853	0.0159436	0.887673	0.968526	0.970981	0.0307	0.942788	0.947253	0.0360356	0.961589	0.887502	0.884176	0.886375	0.456275	0.71924	0.729264	0.695214	0.963022	0.0082378	0.00684878	0.00977857
	RED_32_05M	SRF	RED	0.961394	0.00523886	0.425237	0.978025	0.00564906	0.414702	0.736677	0.743927	0.741116	0.938963	0.882711	0.0110717	0.886033	0.968466	0.969808	0.0159579	0.93818	0.941326	0.0152513	0.962005	0.880352	0.877951	0.880741	0.391979	0.391968	0.394438	0.399514	0.961966	0.00481859	0.00457626	0.00560618
	RED_32_80M	DCM	RED	0.893981	0.0726475	0.149324	0.744373	0.0739733	0.134447	0.465893	0.463251	0.458231	0.732652	0.669266	0.156526	0.656491	0.897703	0.808335	0.839145	0.780693	0.776301	0.944812	0.877349	0.632909	0.638518	0.634833	0.126233	0.853981	0.871949	0.844562	0.887455	0.0697178	0.0702813	0.0756176
	RED_33_05M	SRF	RED	0.935681	0.00409726	0.115719	0.88797	0.00394555	0.109674	0.593228	0.599847	0.596733	0.892299	0.814417	0.00700794	0.827398	0.953706	0.902789	0.0268702	0.831522	0.839424	0.0256526	0.918552	0.807157	0.807206	0.808413	0.100092	0.103476	0.106277	0.109939	0.934568	0.00400087	0.00383916	0.0047797
	RED_34_05M	SRF	RED	0.920917	0.00305157	0.0752033	0.829037	0.00361852	0.0613903	0.512254	0.513478	0.51638	0.846237	0.761578	0.00664463	0.761642	0.936431	0.837973	0.0231858	0.768346	0.76868	0.0228968	0.89899	0.743206	0.74732	0.748822	0.0547847	0.0478441	0.0463182	0.055742	0.917977	0.00356022	0.00340095	0.00362418
	RED_34_60M	DCM	RED	0.246015	0.0806417	0.0555331	0.17729	0.0828813	0.0457275	0.102735	0.0951423	0.103428	0.151447	0.120325	0.384208	0.116246	0.218405	0.313676	0.903843	0.226669	0.21386	0.980897	0.233109	0.0805298	0.0899989	0.0877198	0.0489768	0.748428	0.759313	0.738166	0.227919	0.0783779	0.0770535	0.0798673
	SOC_84_05M	SRF	SOC	0.00177458	0.0015747	0.00216045	0.00188438	0.00178582	0.0015813	0.00181186	0.00156491	0.00131152	0.00219818	0.00166448	0.00170976	0.00174041	0.00194574	0.00347587	0.00213981	0.00276635	0.00166483	0.00230213	0.00238262	0.00170093	0.00177762	0.00272759	0.00171278	0.00161756	0.00183479	0.00408143	0.00268395	0.00165186	0.00131893	0.00186018
	SOC_85_05M	SRF	SOC	0.00154725	0.00167753	0.00431233	0.00175382	0.00189923	0.00357292	0.00154417	0.00169177	0.00137117	0.00221291	0.00131513	0.00164381	0.00158504	0.00176045	0.00155452	0.00213378	0.002776	0.00179147	0.0025463	0.00192361	0.00151655	0.00182389	0.00251781	0.00196458	0.00174838	0.00168075	0.00283973	0.00207113	0.00165408	0.00150785	0.0018408
	SOC_85_90M	DCM	SOC	0.00167939	0.0014376	0.00218613	0.00165774	0.0017526	0.00174435	0.001567	0.00153837	0.0011086	0.00214765	0.00151286	0.00153819	0.00154769	0.00171054	0.00127813	0.0021586	0.00204199	0.00172722	0.00227126	0.00182344	0.0014148	0.00167493	0.00220098	0.00158022	0.00152991	0.00186226	0.00272611	0.00188954	0.00151391	0.00143906	0.00173097
