# Supplementary material for: Linking pangenomes and metagenomes: the Prochlorococcus metapangenome
Source: PeerJ. 2018 Jan 25;6:e4320. doi: 10.7717/peerj.4320 (PMC5804319; doi:10.7717/peerj.4320)
Supplement: Table S3 — Summary of the metapangenomic analysis of Prochlorococcus isolates. The table describes the functionality and environment connectivity of genes identified in the 31 Prochlorococcus isolate genomes, and links each gene to a gene cluster in the Prochlorococcus pangenome. [file peerj-06-4320-s006.xlsx]

## Sheet: Prochlorococcus MetaPan
Supplementary Table 3
	The metapangenome of Prochlorococcus isolates
	The table links genes from 31 Prochlorococcus isolates to gene clusters, functions, and the environment.
	Each row represents a gene call
	"Environmental_class" describes the environmental connectivity of genes based on read recruitment from the TARA Oceans metagenomes.
	unique_id	Gene_cluster_id	bin_name	genome_name	gene_callers_id	Environmental_class	EGGNOG_BACT_ACC	EGGNOG_BACT	Gene3D_ACC	Gene3D	PRINTS_ACC	PRINTS	TIGRFAM_ACC	TIGRFAM	Coils_ACC	Coils	COG_CATEGORY_ACC	COG_CATEGORY	PIRSF_ACC	PIRSF	COG_FUNCTION_ACC	COG_FUNCTION	Hamap_ACC	Hamap	SMART_ACC	SMART	Pfam_ACC	Pfam	ProSiteProfiles_ACC	ProSiteProfiles	ProDom_ACC	ProDom	SUPERFAMILY_ACC	SUPERFAMILY	ProSitePatterns_ACC	ProSitePatterns	aa_sequence
	59608	GC_00002182		CCMP1375	3340	NA	167539.Pro1525	'Phage' integrase family																													------------------------MVRGIGSGHVQKVQLTVRFENGKRSSIILGPKAKSDPDFVPWGVTSAGWILNVCKAISLKMESENKNLDKAYGLVKQNQQSGLDGTLDWEKLSTKFKIHKTSTGKKGSRIWNRNYRTTIDRTLLILASEPPIASGYSVLKTLVERHGGAPGSASRRLRVQYAAEFLRFAFRNGAKKSCLPPEDLNELIGEK-VAINKKKED--
	59605	GC_00002182		LG	9159	NA	167539.Pro1525	'Phage' integrase family																													MTDKSSPWITSLREEIRKSCGDGWMVRGIGSGHVQKVQLTVRFENGKRSSIILGPKAKSDPDFVPWGVTSAGWILNVCKAISLKMESENKNLDKAYGLVKQNQQSGLDGTLDWEKLSTKFKIHKTSTGKKGSRIWNRNYRTTIDRTLLILASEPPIASGYSVLKTLVERHGGAPGSASRRLRVQYAAEFLRFAFRNGAKKSCLPPEDLNELIGEK-VAINKKKED--
	59603	GC_00002182		MIT9303	29232	ECG	167539.Pro1525	'Phage' integrase family									X|L	X|L			COG0582	Integrase															MADKSAKWITALRDGIRRQCGDGWMVRGVGDGLLQRVQLTVRFDDGTRTSIILGPKAKSDPDFVPWIATSADWILKISTEISELMKDQGKGLTDAYELVKQRNESGADGEFDWERLLKKFKSHKTSKSKNGARVWNRNYRTPLARTVVILTSQPEPSSGYTLLKALIERHGGEPGSTSRRLRIQYAAEFLRFAFKHGANRRWLPPEDLKTLIGEKSVDFTQNNVNTV
	59604	GC_00002182		MIT9313	35911	ECG	167539.Pro1525	'Phage' integrase family									X|L	X|L			COG0582	Integrase															MADKSAKWITALRDRIRRQCGDGWMVRGVGDGLLQRVQLTVRFDDGTRTSIILGPKAKTDPDFVPWVATSADWILKISTEISELMKDQGKGLTDAYELVKQRNESGADGEFDWKRLLKKFKSHKTSKSKNGARVWNRNYRTPLARTVVILTSQPEPSSGYTLLKALIERHGGEPGSTSRRLRIQYAAEFLRFAFKHGANRRWLPPEDLKTLIGEKNVDFTQNNVNTV
	59602	GC_00002182		SS2	55767	NA	167539.Pro1525	'Phage' integrase family																													MTDKSSPWITSLREEIRKSCGDGWMVRGIGSGHVQKVQLTVRFENGKRSSIILGPKAKSDPDFVPWGVTSAGWILNVCKAISLKMESENKNLDKAYGLVKQNQQSGLDGTLDWEKLSTKFKIHKTSTGKKGSRIWNRNYRTTIDRTLLILASEPPIASGYSVLKTLVERHGGAPGSASRRLRVQYAAEFLRFAFRNGAKKSCLPPEDLNELIGEK-VAINKKKED--
	59607	GC_00002182		SS35	57270	NA	167539.Pro1525	'Phage' integrase family																													------------------------MVRGIGSGHVQKVQLTVRFENGKRSSIILGPKAKSDPDFVPWGVTSAGWILNVCKAISLKMESENKNLDKAYGLVKQNQQSGLDGTLDWEKLSTKFKIHKTSTGKKGSRIWNRNYRTTIDRTLLILASEPPIASGYSVLKTLVERHGGAPGSASRRLRVQYAAEFLRFAFRNGAKKSCLPPEDLNELIGEK-VAINKKKED--
	59606	GC_00002182		SS51	59877	NA	167539.Pro1525	'Phage' integrase family																													MTDKSSPWITSLREEIRKSCGDGWMVRGIGSGHVQKVQLTVRFENGKRSSIILGPKAKSDPDFVPWGVTSAGWILNVCKAISLKMESENKNLDKAYGLVKQNQQSGLDGTLDWEKLSTKFKIHKTSTGKKGSRIWNRNYRTTIDRTLLILASEPPIASGYSVLKTLVERHGGAPGSASRRLRVQYAAEFLRFAFRNGAKKSCLPPEDLNELIGEK-VAINKKKED--
	569	GC_00004578		GP2	6931	ECG	84588.SYNW2416	'Phage' integrase family	G3DSA:1.10.443.10	G3DSA:1.10.443.10					Coil	Coil											PF00589	Phage integrase family					SSF56349	SSF56349			MKSPKWVAMTRQLIKSNHGFGWSISGWEKNNKLITKVVYRYPDGSRNSILLDLNWASDNSKKMTDIIDELADLMKERNVDLAKAYELINGGKISKGIKKEINWEALTDEFIYDERGNRRDTTKRDLMTRMYRTLQAVNAKPKPRNGEQLFKNYAELFFDRTMPKGGVGRKRNMGDLRAFLNWAVLEKKYLGVEWLPLTSKQYAKYIGAVPKGKKSKV-REPISTPDLEMLLEALKRENKLGLRAIVVLSAVYGIRISEIANMKIKNKKVEITTLKQNVKTMLEEPHVRTVEPLNLPNLAKEGEKIISDLESGKIKYPDPILRAIAKSDDEKGYKLIGERFGKMLNRFWFWKELKTKNPNYVPYSFRHSFAWRASMETTPALPLRTICDYMGHDPKTHLT…
	570	GC_00004578		MIT9321	40936	ECG	232348.SCB01_010100010635	'Phage' integrase family	G3DSA:1.10.443.10	G3DSA:1.10.443.10																							SSF56349	SSF56349			MKPLNWVELTRQQIKARHGFGWSIQGIEKQNKVLTKIVYRFSTGERTTVLTDIEWNTSNSKKIQDLIIEFENLMEERHVDLKKAYELIVGNKVFSD-KKNINWEALINEFVNEERGNRRETTKRDLRLRMKRTMQALNTKPLPRTGEQLFKNYADLFFNRTMPKGGVGRKRDMGDLRAFLNWTVLEKKYLGVEWLPLTSKQYAKYVGSVPKGKKKKTSREPIMTSDFEMLLEALKRENKHGLRAICVLSGVYGIRISEIAGMQIKNGIVEITTLKQNEKTMNEEPHTRIVQPLNLPNLPKLGEEIIADLESGKITFPDPIKRALAKSNDDDGYKLIGERFGKLINRFWFWKELKTKYSNLVPYGFRHSYAWRGSMETVPAVPYRVLADLMGHDLDTHLK…
	25889	GC_00005981	Singletons	SB	53644	EAG	84588.SYNW2416	'Phage' integrase family	G3DSA:1.10.443.10	G3DSA:1.10.443.10																							SSF56349	SSF56349			MANSSRDSWEKLLRKQIHSNYGRGWYVIGENSGRTKLTYEYPFDGRKAAKTLSIEWKETNGLEILKAIEFIKPLVQNQNLTLKEASRRWQAQFVGNTKTPNKAWKDFLIIPPKHTYNKKELDKATKEYKAELKASTVDQFMQTKQGLTSKTEKDWYSRIRPFLELISKRNAPKTGEELVKELARDLGDITPDQRKRYIDGWCEILNYGIERHSMPKRWIPPSESIRKELKGSSTRTREEALTPYIEENDLFKLLDDLESSDPEMFLATGLVSIFGLRLAELAVLKVREGNLYVGQVKNNKNTTNQKRKDRRVFAMDLVEKPNLGKKLIHLYKSQLIKLPATILTQINLVQKKNRFGDVGQAFRDQLLKNKVWKEIEKKNKDITPYSLRHRFAHQCHKGS…
	13049	GC_00000198	HL+LL Core	AS9601	637	ECG	146891.A9601_06581	(ABC) transporter	G3DSA:3.40.50.300	G3DSA:3.40.50.300							P	P			COG1121	ABC-type Mn2+/Zn2+ transport system, ATPase component			SM00382	ATPases associated with a variety of cellular activities	PF00005	ABC transporter	PS50893	ATP-binding cassette, ABC transporter-type domain profile.			SSF52540	SSF52540			----METINYQNF----RIEAENICVDYNGKVALYDANLRLKPGQICGLVGMNGAGKTTFFNALTGFVNISKGKIRINGESVRSAQKDQTIAYVPQNEGIDSQFPISVWDVVMMGRYGSMNIFRCPRESDVQAVKDAIERVDLTDHLSTPIGNLSGGQRKRTFLARAIAQRASILLLDEPFSGVDIRTEKLISELFIQFKNEGKTILLSTHDMIHVREFCDLVLLINKTVVAYGETSEVFTPENITTTFGGISPDFLF-GPES-------
	13069	GC_00000198	HL+LL Core	CCMP1375	2886	NA	167539.Pro1059	(ABC) transporter	G3DSA:3.40.50.300	G3DSA:3.40.50.300							P	P			COG1121	ABC-type Mn2+/Zn2+ transport system, ATPase component			SM00382	ATPases associated with a variety of cellular activities	PF00005	ABC transporter	PS50893	ATP-binding cassette, ABC transporter-type domain profile.			SSF52540	SSF52540	PS00211	ABC transporters family signature.	MAVIPNKDTFVPL----RIDADQVCVDYNGNLALYDASLKLQPGCICGLVGMNGAGKTTFFKALMGFVRPSRGRILINGCSVSTAQKDQAVAYVPQNEGVDCSFPVSVWDVVMMGRYGSMNFLRVPRESDHIAVFDALERVDLIDFRNRPIGALSGGQRKRAFVARAIAQRASVLLLDEPFAGVDIRTEKLMADLFLQLRQDGRSILISTHDLSHVRNFCDVVVLINKTVLAYGNTSDVFTSENLSMTFGGMKSDPIS-GPISSDE----
	13063	GC_00000198	HL+LL Core	EQPAC1	5179	ECG	59919.PMM0602	(ABC) transporter	G3DSA:3.40.50.300	G3DSA:3.40.50.300							P	P			COG1121	ABC-type Mn2+/Zn2+ transport system, ATPase component			SM00382	ATPases associated with a variety of cellular activities	PF00005	ABC transporter	PS50893	ATP-binding cassette, ABC transporter-type domain profile.			SSF52540	SSF52540			----MDELNYKNY----RIEAENICVDYHGKVALYDANLKLKAGQICGLVGMNGAGKTTFFNALTGFVNISKGKIRINGESLRIAQQDQSIAYVPQSEGIDSQFPVSVWDVVMMGRYGSMNILRSPRESDIQAVKDAIERVDLMELSSTPIGNLSGGQRKRTFLARAIAQRASILLLDEPFAGVDIRTEKLISELFMQFKNEGRTILLSTHDMIHVREFCDLVLLINKTVVAYGETSEVFTPENITSTFGGMSPDVLF-GPES-------
	13050	GC_00000198	HL+LL Core	GP2	5680	ECG	146891.A9601_06581	(ABC) transporter	G3DSA:3.40.50.300	G3DSA:3.40.50.300							P	P			COG1121	ABC-type Mn2+/Zn2+ transport system, ATPase component			SM00382	ATPases associated with a variety of cellular activities	PF00005	ABC transporter	PS50893	ATP-binding cassette, ABC transporter-type domain profile.			SSF52540	SSF52540			----METINYQNF----RIDAENICVDYNGKVALYDANLRLKPGQICGLVGMNGAGKTTFFNALTGFVNISKGKIRINGESVRSAQKDQTIAYVPQNEGIDSQFPISVWDVVMMGRYGSMNIFRCPRESDIQAVKDAIERVDLTDHLSTPIGNLSGGQRKRTFLARAIAQRASILLLDEPFSGVDIRTEKLISELFIQFKNEGKTILLSTHDMMHVREFCDLVLLINKTVVAYGETSEVFTPENITTTFGGISPDFLF-GPES-------
	13057	GC_00000198	HL+LL Core	LG	7767	NA	167539.Pro1059	(ABC) transporter	G3DSA:3.40.50.300	G3DSA:3.40.50.300							P	P			COG1121	ABC-type Mn2+/Zn2+ transport system, ATPase component			SM00382	ATPases associated with a variety of cellular activities	PF00005	ABC transporter	PS50893	ATP-binding cassette, ABC transporter-type domain profile.			SSF52540	SSF52540	PS00211	ABC transporters family signature.	MAVIPNKDTFVPL----RIDADQVCVDYNGNLALYDASLKLQPGCICGLVGMNGAGKTTFFKALMGFVRPSRGRILINGCSVSTAQKDQAVAYVPQNEGVDCSFPVSVWDVVMMGRYGSMNFLRVPRESDHIAVFDALERVDLIDFRNRPIGALSGGQRKRAFVARAIAQRASVLLLDEPFAGVDIRTEKLMADLFLQLRQDGRSILISTHDLSHVRNFCDVVVLINKTVLAYGNTSDVFTSENLSMTFGGMKSDPIS-GPISSDE----
	13055	GC_00000198	HL+LL Core	MED4	9883	ECG	59919.PMM0602	(ABC) transporter	G3DSA:3.40.50.300	G3DSA:3.40.50.300							P	P			COG1121	ABC-type Mn2+/Zn2+ transport system, ATPase component			SM00382	ATPases associated with a variety of cellular activities	PF00005	ABC transporter	PS50893	ATP-binding cassette, ABC transporter-type domain profile.			SSF52540	SSF52540			----MDELNYKNY----RIEAENICVDYHGKVALYDANLKLKAGQICGLVGMNGAGKTTFFNALTGFVNISKGKIRINGESLRIAQQDQSIAYVPQSEGIDSQFPVSVWDVVMMGRYGSMNILRSPRESDIQAVKDAIERVDLMELSSTPIGNLSGGQRKRTFLARAIAQRASILLLDEPFAGVDIRTEKLISELFMQFKNEGKTILLSTHDMIHVREFCDLVLLINKTVVAYGETSEVFTPENITSTFGGMSPDVLF-GPES-------
	13048	GC_00000198	HL+LL Core	MIT9107	11852	ECG	93060.P9215_06841	(ABC) transporter	G3DSA:3.40.50.300	G3DSA:3.40.50.300							P	P			COG1121	ABC-type Mn2+/Zn2+ transport system, ATPase component			SM00382	ATPases associated with a variety of cellular activities	PF00005	ABC transporter	PS50893	ATP-binding cassette, ABC transporter-type domain profile.			SSF52540	SSF52540			----MESINYQNF----RIDAENICVDYNGKVALYDANLRLKPGQICGLVGMNGAGKTTFFNALTGFVNISKGKIRINGESVRSAQKDQTIAYVPQNEGIDSQFPISVWDVVMMGRYGSMNIFRCPRESDVQAVKDAIERVDLTDHLSTPIGNLSGGQRKRTFLARAIAQRASILLLDEPFSGVDIRTEKLISELFIQFKNEGKTILLSTHDMIHVREFCDLVILINKTVVAYGETSEVFTPENITTTFGGISPDFLF-GPES-------
	13047	GC_00000198	HL+LL Core	MIT9116	13836	ECG	93060.P9215_06841	(ABC) transporter	G3DSA:3.40.50.300	G3DSA:3.40.50.300							P	P			COG1121	ABC-type Mn2+/Zn2+ transport system, ATPase component			SM00382	ATPases associated with a variety of cellular activities	PF00005	ABC transporter	PS50893	ATP-binding cassette, ABC transporter-type domain profile.			SSF52540	SSF52540			----MESINYQNF----RIDAENICVDYNGKVALYDANLRLKPGQICGLVGMNGAGKTTFFNALTGFVNISKGKIRINGESVRSAQKDQTIAYVPQNEGIDSQFPISVWDVVMMGRYGSMNIFRCPRESDVQAVKDAIERVDLTDHLSTPIGNLSGGQRKRTFLARAIAQRASILLLDEPFSGVDIRTEKLISELFIQFKNEGKTILLSTHDMIHVREFCDLVILINKTVVAYGETSEVFTPENITTTFGGISPDFLF-GPES-------
	13051	GC_00000198	HL+LL Core	MIT9123	16433	ECG	93060.P9215_06841	(ABC) transporter	G3DSA:3.40.50.300	G3DSA:3.40.50.300							P	P			COG1121	ABC-type Mn2+/Zn2+ transport system, ATPase component			SM00382	ATPases associated with a variety of cellular activities	PF00005	ABC transporter	PS50893	ATP-binding cassette, ABC transporter-type domain profile.			SSF52540	SSF52540			----MESINYQNF----RIDAENICVDYNGKVALYDANLRLKPGQICGLVGMNGAGKTTFFNALTGFVNISKGKIRINGESVRSAQKDQTIAYVPQNEGIDSQFPISVWDVVMMGRYGSMNIFRCPRESDVQAVKDAIERVDLTDHLSTPIGNLSGGQRKRTFLARAIAQRASILLLDEPFSGVDIRTEKLISELFIQFKNEGKTILLSTHDMIHVREFCDLVILINKTVVAYGETSEVFTPENITTTFGGISPDFLF-GPES-------
	13053	GC_00000198	HL+LL Core	MIT9201	18070	ECG	167546.P9301_06281	(ABC) transporter	G3DSA:3.40.50.300	G3DSA:3.40.50.300							P	P			COG1121	ABC-type Mn2+/Zn2+ transport system, ATPase component			SM00382	ATPases associated with a variety of cellular activities	PF00005	ABC transporter	PS50893	ATP-binding cassette, ABC transporter-type domain profile.			SSF52540	SSF52540			----MESINFQNF----RIDAENICVDYNGKVALYDANLRLKPGQICGLVGMNGAGKTTFFNALTGFVNISKGKIRINGESVRSAQKDQTIAYVPQNEGIDSQFPISVWDVVMMGRYGSMNIFRSPRESDVQAVKDAIERVDLSDHLSTPIGNLSGGQRKRTFLARAIAQRASILLLDEPFSGVDIRTEKLISELFIQFKNEGKTILLSTHDMIHVREFCDLVLLINKTVVAYGETSEVFTPENITTTFGGISPDFLF-GPES-------
	13060	GC_00000198	HL+LL Core	MIT9202	20282	ECG	93060.P9215_06841	(ABC) transporter	G3DSA:3.40.50.300	G3DSA:3.40.50.300							P	P			COG1121	ABC-type Mn2+/Zn2+ transport system, ATPase component			SM00382	ATPases associated with a variety of cellular activities	PF00005	ABC transporter	PS50893	ATP-binding cassette, ABC transporter-type domain profile.			SSF52540	SSF52540			----MESINYQNY----RIDAENICVDYNGKVALYDANLRLKPGQICGLVGMNGAGKTTFFNALTGFVNISKGKIRINGESVRSAQKDQTIAYVPQNEGIDSQFPISVWDVVMMGRYGSMNIFRCPRESDVQAVKDAIERVDLTDHLSTPIGNLSGGQRKRTFLARAIAQRASILLLDEPFSGVDIRTEKLISELFIQFKNEGKTILLSTHDMIHVREFCDLVLLINKTVVAYGETSEVFTPENITTTFGGISPDFLF-GPES-------
	13065	GC_00000198	HL+LL Core	MIT9211	21725	NA	93059.P9211_10481	(ABC) transporter	G3DSA:3.40.50.300	G3DSA:3.40.50.300							P	P			COG1121	ABC-type Mn2+/Zn2+ transport system, ATPase component			SM00382	ATPases associated with a variety of cellular activities	PF00005	ABC transporter	PS50893	ATP-binding cassette, ABC transporter-type domain profile.			SSF52540	SSF52540	PS00211	ABC transporters family signature.	MTDLFINQKEREF---LRIEAEEVCVDYNGTLALYDASLKLKSGCICGLVGMNGAGKSTLFKALMGFIRPSRGKIRINGLSVLKAQKDQAVAYVPQNEGIDCSFPVSVWDVVMMGRYGSMNFMRIPRASDRQAVWHAIERVELTDFLNKPIGALSGGQRKRAFLARAIAQRASVLLLDEPFSGVDIRTEKLMAELFLQFKQDGRTILISTHDLSHVRDFCDLVVLINKTVLAYGNTSEVFTSENLSMTFGGMHPDPIS-GATSAGDYEQ-
	13062	GC_00000198	HL+LL Core	MIT9215	23141	ECG	93060.P9215_06841	(ABC) transporter	G3DSA:3.40.50.300	G3DSA:3.40.50.300							P	P			COG1121	ABC-type Mn2+/Zn2+ transport system, ATPase component			SM00382	ATPases associated with a variety of cellular activities	PF00005	ABC transporter	PS50893	ATP-binding cassette, ABC transporter-type domain profile.			SSF52540	SSF52540			----MESINYQNY----RIDAENICVDYNGKVALYDANLRLKPGQICGLVGMNGAGKTTFFNALTGFVNISKGKIRINGESLRSAQKDQTIAYVPQNEGIDSQFPISVWDVVMMGRYGSMNIFRCPRESDVQAVKDAIERVDLTDHLSTPIGNLSGGQRKRTFLARAIAQRASILLLDEPFSGVDIRTEKLISELFIQFKNEGKTILLSTHDMIHVREFCDLVLLINKTVVAYGETSEVFTPENITTTFGGISPDFLF-GPES-------
	13061	GC_00000198	HL+LL Core	MIT9301	25033	ECG	167546.P9301_06281	(ABC) transporter	G3DSA:3.40.50.300	G3DSA:3.40.50.300							P	P			COG1121	ABC-type Mn2+/Zn2+ transport system, ATPase component			SM00382	ATPases associated with a variety of cellular activities	PF00005	ABC transporter	PS50893	ATP-binding cassette, ABC transporter-type domain profile.			SSF52540	SSF52540			----METINYQNF----RIEAENICVDYNGKVALYDANLRLKPGQICGLVGMNGAGKTTFFNALTGFVNISKGKIRINGESVRSAQKDQTIAYVPQNEGIDSQFPISVWDVVMMGRYGSMNIFRSPRESDVQAVKDAIERVDLTDHLSTPIGNLSGGQRKRTFLARAIAQRASILLLDEPFSGVDIRTEKLISELFIQFKNEGKTILLSTHDMIHVREFCDLVLLINKTVVAYGETSEVFTPENITTTFGGISPDFLF-GPES-------
	13059	GC_00000198	HL+LL Core	MIT9302	27492	ECG	74546.PMT9312_0602	(ABC) transporter	G3DSA:3.40.50.300	G3DSA:3.40.50.300							P	P			COG1121	ABC-type Mn2+/Zn2+ transport system, ATPase component			SM00382	ATPases associated with a variety of cellular activities	PF00005	ABC transporter	PS50893	ATP-binding cassette, ABC transporter-type domain profile.			SSF52540	SSF52540			----MEKLHYQNY----RIYAENICVDYNGKVALYDANLRLKPGQICGLVGMNGAGKTTFFNALTGFVNISKGKIRINGESLRSAQKDQTIAYVPQSEGIDSQFPVNVWDVVMMGRYGSMNVLRCPRESDVQAVKDAIERVDLTDFLSTPIGNLSGGQRKRTFLARAIAQRASILLLDEPFTGVDIRTEKLISELFIQFKNEGKTILLSTHDMIHVREVCDLVLLINKTVVAYGETSEVFTPENITSTFGGISPDVLF-GPES-------
	13040	GC_00000198	HL+LL Core	MIT9303	29910	ECG	74547.PMT0417	(ABC) transporter	G3DSA:3.40.50.300	G3DSA:3.40.50.300							P	P			COG1121	ABC-type Mn2+/Zn2+ transport system, ATPase component			SM00382	ATPases associated with a variety of cellular activities	PF00005	ABC transporter	PS50893	ATP-binding cassette, ABC transporter-type domain profile.			SSF52540	SSF52540	PS00211	ABC transporters family signature.	----MDQCRSIPFGDRLRIEADQICVDYNGVVALYDASLHLRAGCICGLVGMNGSGKSTLFKALMGFVRPSRGTIQINGLSVPRAQRDQAVAYVPQSEEIDCSFPISVWEVVMMGRYGSMNLLRIPRESDRLAVWHALERVELLDLRHRPIGALSGGQRKRAFLARAIAQRASVLLLDEPFNGVDVRTEKLMAELFLQFRHEGHTILISTHDLSHVREFCDLVVLINKTVLAYGETAEVFTPENLAMTFGGMVPNVLSGGPTSTEDFKQ-
	13068	GC_00000198	HL+LL Core	MIT9311	32784	ECG	74546.PMT9312_0602	(ABC) transporter	G3DSA:3.40.50.300	G3DSA:3.40.50.300							P	P			COG1121	ABC-type Mn2+/Zn2+ transport system, ATPase component			SM00382	ATPases associated with a variety of cellular activities	PF00005	ABC transporter	PS50893	ATP-binding cassette, ABC transporter-type domain profile.			SSF52540	SSF52540			----MENSNYQNY----RIDAENICVDYNGKVALYDANLRLKPGQICGLVGMNGAGKTTFFNALTGFVNISKGKIRINGESLRSAQKDQTIAYVPQSEGIDSQFPVNVWDVVMMGRYGSMNVLRCPRESDVQAVKDAIERVDLTDFLSTPIGNLSGGQRKRTFLARAIAQRASILLLDEPFTGVDIRTEKLISELFIQFKNEGKTILLSTHDMIHVREFCDLVLLINKTVVAYGETSEVFTPENITSTFGGISPDVLF-GPES-------
	13054	GC_00000198	HL+LL Core	MIT9312	33471	ECG	74546.PMT9312_0602	(ABC) transporter	G3DSA:3.40.50.300	G3DSA:3.40.50.300							P	P			COG1121	ABC-type Mn2+/Zn2+ transport system, ATPase component			SM00382	ATPases associated with a variety of cellular activities	PF00005	ABC transporter	PS50893	ATP-binding cassette, ABC transporter-type domain profile.			SSF52540	SSF52540			----MENSNYQNY----RIDAENICVDYNGKVALYDANLRLKPGQICGLVGMNGAGKTTFFNALTGFVNISKGKIRINGESLRSAQKDQTIAYVPQSEGIDSQFPVNVWDVVMMGRYGSMNVLRCPRESDVQAVKDAIERVDLTDFLSTPIGNLSGGQRKRTFLARAIAQRASILLLDEPFTGVDIRTEKLISELFIQFKNEGKTILLSTHDMIHVREFCDLVLLINKTVVAYGETSEVFTPENITSTFGGISPDVLF-GPES-------
	13046	GC_00000198	HL+LL Core	MIT9313	35230	ECG	74547.PMT0417	(ABC) transporter	G3DSA:3.40.50.300	G3DSA:3.40.50.300							P	P			COG1121	ABC-type Mn2+/Zn2+ transport system, ATPase component			SM00382	ATPases associated with a variety of cellular activities	PF00005	ABC transporter	PS50893	ATP-binding cassette, ABC transporter-type domain profile.			SSF52540	SSF52540	PS00211	ABC transporters family signature.	----MDQCRSIPFGDRLRIEADQICVDYNGVVALYDASLHLRAGCICGLVGMNGSGKSTLFKALMGFVRPSRGTIQINGLSVPRAQRDQAVAYVPQSEEIDCSFPISVWEVVMMGRYGSMNLLRIPRESDRLAVWHALERVELLDLRHRPIGALSGGQRKRAFLARAIAQRASVLLLDEPFNGVDVRTEKLMAELFLQFRHEGHTILISTHDLSHVREFCDLVVLINKTVLAYGETAEVFTPENLAMTFGGMVPNVLSGGPTSTEDFKQ-
	13045	GC_00000198	HL+LL Core	MIT9314	37433	ECG	146891.A9601_06581	(ABC) transporter	G3DSA:3.40.50.300	G3DSA:3.40.50.300							P	P			COG1121	ABC-type Mn2+/Zn2+ transport system, ATPase component			SM00382	ATPases associated with a variety of cellular activities	PF00005	ABC transporter	PS50893	ATP-binding cassette, ABC transporter-type domain profile.			SSF52540	SSF52540			----METINYQNF----RIEAENICVDYNGKVALYDANLRLQPGQICGLVGMNGAGKTTFFNALTGFVNISKGKIRINGESLRSAQKDQTIAYVPQNEGIDSQFPISVWDVVMMGRYGSMNIFRCPRESDVQAVKDAIERVDLTDHLSTPIGNLSGGQRKRTFLARAIAQRASILLLDEPFSGVDIRTEKLISELFIQFKNEGKTILLSTHDMIHVREFCDLVLLINKTVVAYGETSEVFTPENITTTFGGISPDFLF-GPES-------
	13052	GC_00000198	HL+LL Core	MIT9321	40318	ECG	167546.P9301_06281	(ABC) transporter	G3DSA:3.40.50.300	G3DSA:3.40.50.300							P	P			COG1121	ABC-type Mn2+/Zn2+ transport system, ATPase component			SM00382	ATPases associated with a variety of cellular activities	PF00005	ABC transporter	PS50893	ATP-binding cassette, ABC transporter-type domain profile.			SSF52540	SSF52540			----METINYRNF----RIEAENICVDYNGKVALYDANLRLKPGQICGLVGMNGAGKTTFFNALTGFVNISKGKIRINGESVRSAQKDQTIAYVPQNEGIDSQFPISVWDVVMMGRYGSMNIFRSPRESDVQAVKDAIERVDLTDHLSTPIGNLSGGQRKRTFLARAIAQRASILLLDEPFSGVDIRTEKLISELFIQFKNEGKTILLSTHDMIHVREFCDLVLLINKTVVAYGETSEVFTPENITTTFGGISPDSLF-GPES-------
	13043	GC_00000198	HL+LL Core	MIT9322	42755	ECG	167546.P9301_06281	(ABC) transporter	G3DSA:3.40.50.300	G3DSA:3.40.50.300							P	P			COG1121	ABC-type Mn2+/Zn2+ transport system, ATPase component			SM00382	ATPases associated with a variety of cellular activities	PF00005	ABC transporter	PS50893	ATP-binding cassette, ABC transporter-type domain profile.			SSF52540	SSF52540			----METINYRNF----RIEAENICVDYNGKVALYDANLRLKPGQICGLVGMNGAGKTTFFNALTGFVNISKGKIRINGESVRSAQKDQTIAYVPQNEGIDSQFPISVWDVVMMGRYGSMNIFRSPRESDVQAVKDAIERVDLTDHLSTPIGNLSGGQRKRTFLARAIAQRASILLLDEPFSGVDIRTEKLISELFIQFKNEGKTILLSTHDMIHVREFCDLVLLINKTVVAYGETSEVFTPENITTTFGGISPDSLF-GPES-------
	13064	GC_00000198	HL+LL Core	MIT9401	44617	ECG	167546.P9301_06281	(ABC) transporter	G3DSA:3.40.50.300	G3DSA:3.40.50.300							P	P			COG1121	ABC-type Mn2+/Zn2+ transport system, ATPase component			SM00382	ATPases associated with a variety of cellular activities	PF00005	ABC transporter	PS50893	ATP-binding cassette, ABC transporter-type domain profile.			SSF52540	SSF52540			----METINYRNF----RIEAENICVDYNGKVALYDANLRLKPGQICGLVGMNGAGKTTFFNALTGFVNISKGKIRINGESVRSAQKDQTIAYVPQNEGIDSQFPISVWDVVMMGRYGSMNIFRSPRESDVQAVKDAIERVDLTDHLSTPIGNLSGGQRKRTFLARAIAQRASILLLDEPFSGVDIRTEKLISELFIQFKNEGKTILLSTHDMIHVREFCDLVLLINKTVVAYGETSEVFTPENITTTFGGISPDSLF-GPES-------
	13044	GC_00000198	HL+LL Core	MIT9515	45562	ECG	167542.P9515_06671	(ABC) transporter	G3DSA:3.40.50.300	G3DSA:3.40.50.300							P	P			COG1121	ABC-type Mn2+/Zn2+ transport system, ATPase component			SM00382	ATPases associated with a variety of cellular activities	PF00005	ABC transporter	PS50893	ATP-binding cassette, ABC transporter-type domain profile.			SSF52540	SSF52540	PS00211	ABC transporters family signature.	----METPKYKNY----RIEAENICVDYHGKVALYDANLKLKAGQICGLVGMNGAGKTTFFNALTGFVNISKGKVRINGESLRSAQKDQSIAYVPQLEGIDSQFPVNVWDVVMMGRYGSMNITRSPRESDIQAVKDAIERVDLIGLSSSPIGNLSGGQRKRAFLARAIAQRASILLLDEPFAGVDIRTEKLISELFIQFKSEGKTILLSTHDIIHVREFCDLVLLINKTVVAYGETSEVFTPENITSTFGGMSPDVLF-GPES-------
	13067	GC_00000198	HL+LL Core	NATL1A	47394	ECG	167555.NATL1_06581	(ABC) transporter	G3DSA:3.40.50.300	G3DSA:3.40.50.300							P	P			COG1121	ABC-type Mn2+/Zn2+ transport system, ATPase component			SM00382	ATPases associated with a variety of cellular activities	PF00005	ABC transporter	PS50893	ATP-binding cassette, ABC transporter-type domain profile.			SSF52540	SSF52540	PS00211	ABC transporters family signature.	MNPIYKSHEKDFM----RIEADQVCVDYNGTVALYDASLNLKAGSICGLVGMNGAGKSTFFKALMGFVRPSRGKIRINGIKVNQAQKEQSVAYVPQNEGIDYSFPVSVWDVVMMGRYGAMNIFRIPRESDRRAVVHALERVDLLDLRERPIGSLSGGQRKRAFLARAIAQRASVLLLDEPFSGVDVPTEKLMAELFLQFRQEGHTILISTHDLNHVRDFCDFVVLINKTVLAYGETSEVFTSENLNKTFGGIPPNPLS-GPTSSKDFVNE
	13042	GC_00000198	HL+LL Core	NATL2A	49414	ECG	167555.NATL1_06581	(ABC) transporter	G3DSA:3.40.50.300	G3DSA:3.40.50.300							P	P			COG1121	ABC-type Mn2+/Zn2+ transport system, ATPase component			SM00382	ATPases associated with a variety of cellular activities	PF00005	ABC transporter	PS50893	ATP-binding cassette, ABC transporter-type domain profile.			SSF52540	SSF52540	PS00211	ABC transporters family signature.	MNPIFKSHEKDFM----RIEADQVCVDYNGTVALYDASLNLKAGSICGLVGMNGAGKSTFFKALMGFVRPSRGKIRINGIKVNQAQKEQSVAYVPQNEGIDYSFPVSVWDVVMMGRYGAMNIFRIPRESDRRAVVHALERVDLFDLRERPIGSLSGGQRKRAFLARAIAQRASVLLLDEPFSGVDVPTEKLMAELFLQFRQEGHTILISTHDLNHVRDFCDFVVLINKTVLAYGETSEVFTSENLNKTFGGIPPNPLS-GPTSSKDFINE
	13041	GC_00000198	HL+LL Core	PAC1	52411	ECG	167555.NATL1_06581	(ABC) transporter	G3DSA:3.40.50.300	G3DSA:3.40.50.300							P	P			COG1121	ABC-type Mn2+/Zn2+ transport system, ATPase component			SM00382	ATPases associated with a variety of cellular activities	PF00005	ABC transporter	PS50893	ATP-binding cassette, ABC transporter-type domain profile.			SSF52540	SSF52540	PS00211	ABC transporters family signature.	MNPIFKSHEKDFM----RIEADQVCVDYNGTVALYDASLNLKAGSICGLVGMNGAGKSTFFKALMGFVRPSRGKIRINGIKVNQAQKEQSVAYVPQNEGIDYSFPVSVWDVVMMGRYGAMNIFRIPRESDRRAVVHALERVDLFDLRERPIGSLSGGQRKRAFLARAIAQRASVLLLDEPFSGVDVPTEKLMAELFLQFRQEGHTILISTHDLNHVRDFCDFVVLINKTVLAYGETSEVFTSENLNKTFGGIPPNPLS-GPTSSKDFINE
	13056	GC_00000198	HL+LL Core	SB	53426	ECG	167546.P9301_06281	(ABC) transporter	G3DSA:3.40.50.300	G3DSA:3.40.50.300							P	P			COG1121	ABC-type Mn2+/Zn2+ transport system, ATPase component			SM00382	ATPases associated with a variety of cellular activities	PF00005	ABC transporter	PS50893	ATP-binding cassette, ABC transporter-type domain profile.			SSF52540	SSF52540			----MEKINYQNF----RIEAENICVDYNGKVALYDANLRLKPGQICGLVGMNGAGKTTFFNALTGFVNISKGKIRINGESVRSAQKDQTIAYVPQNEGIDSQFPISVWDVVMMGRYGSMNIFRSPRESDVQAVKDAIERVDLTDHLSTPIGNLSGGQRKRTFLARAIAQRASILLLDEPFSGVDIRTEKLISELFIQFKNEGKTILLSTHDMIHVREFCDLVLLINKTVVAYGETSEVFTPENITTTFGGISPDFLF-GPES-------
	13039	GC_00000198	HL+LL Core	SS2	56092	NA	167539.Pro1059	(ABC) transporter	G3DSA:3.40.50.300	G3DSA:3.40.50.300							P	P			COG1121	ABC-type Mn2+/Zn2+ transport system, ATPase component			SM00382	ATPases associated with a variety of cellular activities	PF00005	ABC transporter	PS50893	ATP-binding cassette, ABC transporter-type domain profile.			SSF52540	SSF52540	PS00211	ABC transporters family signature.	MAVIPNKDTFVPL----RIDADQVCVDYNGNLALYDASLKLQPGCICGLVGMNGAGKTTFFKALMGFVRPSRGRILINGCSVSTAQKDQAVAYVPQNEGVDCSFPVSVWDVVMMGRYGSMNFLRVPRESDHIAVFDALERVDLIDFRNRPIGALSGGQRKRAFVARAIAQRASVLLLDEPFAGVDIRTEKLMADLFLQLRQDGRSILISTHDLSHVRNFCDVVVLINKTVLAYGNTSDVFTSENLSMTFGGMKSDPIS-GPISSDE----
	13066	GC_00000198	HL+LL Core	SS35	57495	NA	167539.Pro1059	(ABC) transporter	G3DSA:3.40.50.300	G3DSA:3.40.50.300							P	P			COG1121	ABC-type Mn2+/Zn2+ transport system, ATPase component			SM00382	ATPases associated with a variety of cellular activities	PF00005	ABC transporter	PS50893	ATP-binding cassette, ABC transporter-type domain profile.			SSF52540	SSF52540	PS00211	ABC transporters family signature.	MAVIPNKDTFVPL----RIDADQVCVDYNGNLALYDASLKLQPGCICGLVGMNGAGKTTFFKALMGFVRPSRGRILINGCSVSTAQKDQAVAYVPQNEGVDCSFPVSVWDVVMMGRYGSMNFLRVPRESDHIAVFDALERVDLIDFRNRPIGALSGGQRKRAFVARAIAQRASVLLLDEPFAGVDIRTEKLMADLFLQLRQDGRSILISTHDLSHVRNFCDVVVLINKTVLAYGNTSDVFTSENLSMTFGGMKSDPIS-GPISSDE----
	13058	GC_00000198	HL+LL Core	SS51	59709	NA	167539.Pro1059	(ABC) transporter	G3DSA:3.40.50.300	G3DSA:3.40.50.300							P	P			COG1121	ABC-type Mn2+/Zn2+ transport system, ATPase component			SM00382	ATPases associated with a variety of cellular activities	PF00005	ABC transporter	PS50893	ATP-binding cassette, ABC transporter-type domain profile.			SSF52540	SSF52540	PS00211	ABC transporters family signature.	MAVIPNKDTFVPL----RIDADQVCVDYNGNLALYDASLKLQPGCICGLVGMNGAGKTTFFKALMGFVRPSRGRILINGCSVSTAQKDQAVAYVPQNEGVDCSFPVSVWDVVMMGRYGSMNFLRVPRESDHIAVFDALERVDLIDFRNRPIGALSGGQRKRAFVARAIAQRASVLLLDEPFAGVDIRTEKLMADLFLQLRQDGRSILISTHDLSHVRNFCDVVVLINKTVLAYGNTSDVFTSENLSMTFGGMKSDPIS-GPISSDE----
	53744	GC_00001651		MIT9303	29319	ECG	266834.SMc03135	(ABC) transporter	G3DSA:3.40.50.300	G3DSA:3.40.50.300					Coil	Coil	E	E	PIRSF039085	PIRSF039085	COG1126	ABC-type polar amino acid transport system, ATPase component			SM00382	ATPases associated with a variety of cellular activities	PF00005	ABC transporter	PS50893	ATP-binding cassette, ABC transporter-type domain profile.			SSF52540	SSF52540	PS00211	ABC transporters family signature.	-MIPAIHASGLVKCFGDHQRALDEVSLQVESGEVLVVMGPSGSGKSTLIRTFNGLESLDEGRLEVLGIPLNA-DHDERQIRRIRKRVGMVFQQFNLFPHLSILDNITLAPIRVQRRPRKEAEARANDLLTQMGIAEQAGKYPGQLSGGQQQRVAIARALALQPEIMLFDEPTSALDPERVKEVLDAMRSLANNGMTMVVVTHEIDFAREVADRVLFMDEGKVVETSSPDEFFANAREERSRRFLNQVM--
	53748	GC_00001651		MIT9313	35763	ECG	266834.SMc03135	(ABC) transporter	G3DSA:3.40.50.300	G3DSA:3.40.50.300					Coil	Coil	E	E	PIRSF039085	PIRSF039085	COG1126	ABC-type polar amino acid transport system, ATPase component			SM00382	ATPases associated with a variety of cellular activities	PF00005	ABC transporter	PS50893	ATP-binding cassette, ABC transporter-type domain profile.			SSF52540	SSF52540	PS00211	ABC transporters family signature.	-MIPAIQATGLVKSFGDHQRALDEVSLHVESGEVLVVMGPSGSGKSTLIRTFNGLESLDEGRLEVLGIPLDA-DHDEHQIRRIRKRVGMVFQQFNLFPHLSILDNITLAPIRVQRRPRKEAEARANDLLTQMGIAEQAGKYPGQLSGGQQQRVAIARALALQPEIMLFDEPTSALDPERVKEVLDAMRSLANDGMTMVVVTHEMGFAREVADRVLFMDEGKVVETSSPDEFFANAREERSRRFLNQMM--
	53747	GC_00001651		MIT9515	46112	ECG	366394.Smed_2101	(ABC) transporter	G3DSA:3.40.50.300	G3DSA:3.40.50.300							E	E	PIRSF039085	PIRSF039085	COG1126	ABC-type polar amino acid transport system, ATPase component			SM00382	ATPases associated with a variety of cellular activities	PF00005	ABC transporter	PS50893	ATP-binding cassette, ABC transporter-type domain profile.			SSF52540	SSF52540	PS00211	ABC transporters family signature.	-MKPILSAKNLTKSYAKGTLALNKVSFTLDQGKVLVIMGPSGSGKSTLIRTINGLETFDKGELNVLGIKIRA-DSDERKIQKIRRRVGMVFQQFNLFPHLSILENITLAPIQVQKRNKKEAEEYGMNLLCQMGIESHANKYPGQLSGGEQQRVAIARSLALKPELLLFDEPTSALDPERINEVLDAMRRLADQGMTMIVVTHEIKFAKEVSDQVLFIDSGKIVEMSSPQAFFSNASNERSRKFLNQIN--
	42133	GC_00002881		MIT9314	39077	EAG	592010.GCWU000182_01745	(ABC) transporter	G3DSA:3.40.50.300	G3DSA:3.40.50.300							V	V			COG1132	ABC-type multidrug transport system, ATPase and permease component			SM00382	ATPases associated with a variety of cellular activities	PF00005	ABC transporter	PS50929	ABC transporter integral membrane type-1 fused domain profile.			SSF52540	SSF52540	PS00211	ABC transporters family signature.	MYHAYKILKDILQNVNTKSQYLISQHLIFSLLVTLLDLVLYFLIAADYKDNFIFYSWELSPPILIILTIIFISFSRLLLLYSTVITTACVGTSLHTNLVYSYLQLPYITFKRNEKGFYINKLSKHVELAIHSLFSCFQLIICALTLLISAIYVLFNSDTNTILLISFTGLLFLGISVFAKKKLTKISAYHQDNLNQLMLGNVRLISSFREIFFAQTLHQEIFNEERLIQKTWMNGSFIAFYSNFSRYILEPIILISAVIFLLRDNSFGEIFRNPAILFSLLRAISVIQTLFSSWANVMAYKGFAFSVCQDIKFLFNKNKLNNLDHQKVILSHNESNVIEFRNITFKYNKNQVILKRLSFCFKSGVNVLMGNNGTGKSTLLDIICGLVPPDSGEVYIQGI…
	10634	GC_00003522		NATL1A	48702	EAG	32051.SynWH7803_0137	(ABC) transporter									M|G	M|G			COG1682	ABC-type polysaccharide/polyol phosphate export permease					PF01061	ABC-2 type transporter									MTIIVKMLLDNFKLAFKTRRAWWYTASSRSRARFARTTLGSFWLGFSNLLSIGTLGIVYGTVFSVADFKSYFIYLGFGLVIWNTISSSISNSPHLFAHNSSNIKNMNIKPIFYTLEEWSFQLQTFIQSFILVFFVFLFFQSELIGHLLLYSWIPLLNLFIFIYWFPLIVCIISVRFTDIAQLVPIVLQLVFLTSPILYRKESLGSLGWITNLNFIYHILDPLRASIIEGNINYQDSMLLLIFNLIGLIITIRLLEIESKSLPFLL
	10633	GC_00003522		NATL2A	50683	EAG	32051.SynWH7803_0137	(ABC) transporter									M|G	M|G			COG1682	ABC-type polysaccharide/polyol phosphate export permease															MIISTAMIIDDFKFAINNRRVWWYTATSRTRARFARTTLGSFWLGFSNLLSISTLGFVYGTVFKVQDFSSYFVYLGIGLVIWNTISSSVCMAPNLFSNNSSNIKNMNLRPLFYTLEEWAFQIQTFFQSFLLVFIVLLLFKPVLLINICTASWIPMLNFVLFIYWFPLLLCLISIRYTDLAQLVPIIMQIVFLTSPILYRKESLGNIGWITDVNLFYRILDPLRVSINSGFVNYRESLLILIINFVGIYFSLNFLKKSSGKLPFLV
	10632	GC_00003522		PAC1	50964	EAG	32051.SynWH7803_0137	(ABC) transporter									M|G	M|G			COG1682	ABC-type polysaccharide/polyol phosphate export permease					PF01061	ABC-2 type transporter									-------MISDFQYAIRTRRAWWFTATSRTKARFARTILGSFWLGFSNLLTIAALGVVYGTVFSVPNFKEYFIYLGIGLVIWNSISFSIISSPQLFTHNSMNIKNLNIRPIFYTLEEWAFQLQTFFQSFILVLISLSFLNPNIIINSFTSALFPLLNLLLFLYWLPLIICLIGAWFTDFIQLVPIVLQILFLISPILYQKENLGDLQWITEYNIFYKIMAPCREAIIFGTIDYKLMIYLFLLNLIGIILSVYFLKRQERFLPFLT
	20227	GC_00005477	Singletons	MIT9215	23871	EAG	1002339.HMPREF9373_1074	(ABC) transporter	G3DSA:3.40.50.300	G3DSA:3.40.50.300							V	V			COG1132	ABC-type multidrug transport system, ATPase and permease component			SM00382	ATPases associated with a variety of cellular activities	PF00005	ABC transporter	PS50893	ATP-binding cassette, ABC transporter-type domain profile.			SSF52540	SSF52540	PS00211	ABC transporters family signature.	MKYLNKLIYFFDKYYLPIKQYIDDQYRFRFYLCILLTILSVTVEVISILLIPKIVDNISSLNLSNSAHFIVFFIIFIFINAFVKTAYIFITNNFSYKLATLYSRAIFETPLNSSLEIFNDVSLDKFVVAISTKCDFIAAQIAIPFFTLLSALLSSLAIIISVIYLFPLRGIIFLLLISLLYLFISLFLTKKIAQNGKVIPKMQSNLYNISLDSLSNTASINLLNLKNEYVKHFIETDTKYRMAISNNDALATAPKFFIEALGIILIILIGFVPLLLNQTSIADSIALTSVLAFSCQKLLPILQGAYASIYKMLGQKESFKQVVEIANFKKYIIEDKIKSNKNSTNLLNDEISIEFILKKNLVFKEGEKVSFKDGFKLLSNKWYFLTGESGVGKSYLLKN…
	59882	GC_00006769	Singletons	GP2	6914	EAG	857087.Metme_1158	(ABC) transporter	G3DSA:3.40.50.300	G3DSA:3.40.50.300							V	V			COG1132	ABC-type multidrug transport system, ATPase and permease component			SM00382	ATPases associated with a variety of cellular activities	PF00005	ABC transporter	PS50929	ABC transporter integral membrane type-1 fused domain profile.			SSF52540	SSF52540	PS00211	ABC transporters family signature.	MMKSILLRIYEISNLFNLITRKRKFQFLQLVVLSLISALIEILNISIIIPYLGSMANIQSNNALTTLSYIEKFIPGENFILIISLLMILSILISMFFRLVTLKYQFKLSTNIASDLGLRIFSKSLEMPYSWHQTINSSVLKGYITKDVDNVSEYVKGITFILVNSILIMVISSYLIFVYPLRTAILLSIISFLYLSLFFKIKFSLSNDGKIYSKKYQETLQIAEETYNNIDIIKLSNNFEYFKKKFNFPNKEFRNMSANINIKSQSPRYIIETFILVLIIAASLFIYSKDKDFQNEFIALGTIGLGSLKLLTPLQQFFNGVTCIQAYKSSFKKISNFLLKNNKLIKRSNKLFNMDKDIILEFLNVSFRYKTDDKYSLSKINLKIKQGQKIGVVGFSGSG…
	13381	GC_00007298	Singletons	MIT9303	28367	ECG	69042.WH5701_03114	(ABC) transporter									M|G	M|G			COG1682	ABC-type polysaccharide/polyol phosphate export permease					PF01061	ABC-2 type transporter									MRVPRAEDQLALIETAPAQGFGFIFVLRTARAWWYSAWLRTLARFSRTYLGSFWLGLSNLLSVALLGAVYGAVFNIANPWDYVVYLGLGYTIWGFISLTVISASTLFSTRRDQLINNSLPAIFYCLEEWAFQVQTFAQSLVIVMIPILFIKPMLWLHALTSIWLPLINVLLFCFWITALMAVLGSRFKDVAQLMPILMQLTFLLSPILYKKEGLGSMAFVADLNPFYRILAPLRTALIDGDVYFRAEFATLFVNIILILIACYWLKRVRYNMPFWV
	28735	GC_00004706		MIT9303	29802	ECG	74547.PMT0517	(CBS) domain	G3DSA:3.20.20.70	G3DSA:3.20.20.70							T	T			COG0517	CBS domain			SM00116	Domain in cystathionine beta-synthase and other proteins.	PF00571	CBS domain	PS51371	CBS domain profile.			SSF54631	SSF54631			MVLQQTVKDVMSTPVLSVVPATSLQEAVQLMTDHHISGLPVVNDDGTLVGELTEQDLMVRESGVDAGPYVLLLDSVIYLRNPLNWDKQVHQVLGTSVNDLMRSDTHTCNEALPLPRAAAMLHDRSTQRLFVINDQRKLVGVITRGDVVRALSMQGD
	28736	GC_00004706		MIT9313	35340	ECG	74547.PMT0517	(CBS) domain	G3DSA:3.20.20.70	G3DSA:3.20.20.70							T	T			COG0517	CBS domain			SM00116	Domain in cystathionine beta-synthase and other proteins.	PF00571	CBS domain	PS51371	CBS domain profile.			SSF54631	SSF54631			MVLQQTVKDVMSTPVLSVVPATSLQEAVQLLSDHHISGLPVVNDDGTLVGELTEQDLMVRESGVDAGPYVLLLDSVIYLRNPLNWDKQVHQVLGTSVNDLMRSDTHTCNEALPLPRAAAMLHDRSTQRLFVINDQRKLVGVITRGDVVRALSMQGD
	23288	GC_00003347		MIT9314	37823	ECG	400668.Mmwyl1_3309	(twin-arginine translocation) pathway signal	G3DSA:2.120.10.30	G3DSA:2.120.10.30							R	R			COG3211	Secreted phosphatase, PhoX family					PF05787	Bacterial protein of unknown function (DUF839)	PS51318	Twin arginine translocation (Tat) signal profile.			SSF63829	SSF63829			MADFNDVVSRRKFLQGSFALGSGAFIAATIGPAKATSFLSDFNGISFNPVPANSKDTITLPKGFSWHKVASWGDPLWSGVDDFDQITRGTGESQEGSFGDNNDGMSLFDIEEKSILAVNNEYCNRKIIYGNRASGLPETSDDVRKGIASHGVSIFEIEKKLGKWKIKKDSLYNRKITGDTKIALDGPAAGFYLMKTDEDLTGKVAKGTFNNCGNGRTPWGTYLACEENFHGYFSSPSNPSASIPPEQARYGLKTKDKGYNWVMNQDRFDLVKNPNEVNRHGYITEIDPSKPQSMPRKHTAMGRFKHENCEVSISKNGQVVAYMGDDERGEHLYKFVSKGKYKKGASSNYDLLTEGELFVAVFNDDGTGKWINLKESGMSEPEIAIFTRLAATKVGATTM…
	30902	GC_00000532	HL+LL Core	AS9601	96	ECG	146891.A9601_00961	)-transporter	G3DSA:3.30.70.1450	G3DSA:3.30.70.1450							S|G	S|G			COG0471|COG0471|COG3273|COG3273	Di- and tricarboxylate transporter|Di- and tricarboxylate transporter|Uncharacterized conserved protein, contains PhoU and TrkA_C domains|Uncharacterized conserved protein, contains PhoU and TrkA_C domains					PF03600	Citrate transporter	PS51202	RCK C-terminal domain profile.			SSF116726	SSF116726	PS01271	Sodium:sulfate symporter family signature.	---------------MNLIAVVSNNFDAFITVVVLIMSIILFIRNTIAPELTGLLCVGIFISTGVLSPEKALAGFGSPSLITLMGLFAVSSALFKSGALDRVRELISSESIRTPRKLISLIAFLIAPISGIVPNTPVVASLLPLIESWCERRNISPSKVLLPLSFATLLGGTLTLLGSSVNLLVSDISQQLGYGGLELFSLTSIGIPVWLIGTTYMILVSDMLLPDRGRDK-EFIKNGDMNIYFTEVTIPSTSELVGQSVRNSRLQRRFDVDVLELQRNGKVILPPLADRKIEPNDRLIIRVTRADLFRLQQEHTILLGENKTSFDGANVFSD--DEGTKTFEALLPAGSTLAGASLRELRFRQRHNATVLALRRGQQTVQERLGQAVLRAGDVLLLQA…
	30922	GC_00000532	HL+LL Core	CCMP1375	1963	NA	167539.Pro0097	)-transporter	G3DSA:3.30.70.1450	G3DSA:3.30.70.1450							S|G	S|G			COG0471|COG0471|COG3273|COG3273	Di- and tricarboxylate transporter|Di- and tricarboxylate transporter|Uncharacterized conserved protein, contains PhoU and TrkA_C domains|Uncharacterized conserved protein, contains PhoU and TrkA_C domains					PF03600	Citrate transporter	PS51202	RCK C-terminal domain profile.			SSF116726	SSF116726			---------------MNELIVVLDNPQALITLGVLFIAVLLFISGWLAPELTGLLSVALLMATGVLEPQKALAGFGSPALITLMGLFAVSAALFKSGALDRLRELIAFESIKTPRRLIGVLGFVVAPISGIVPNTPVVASLLPVIEAWCVKRNISPSRVLLPLSFATLLGGTLTLLGSSVNLLVSDISAQLGYGPLELFSFTAIGIPIWFIGTIYLLLAPQSLLPDRGREKSDFGSRPDQTGYFTEVTIPIDSELVGQSLRNSRLQRRFDVDVLELQRGKERLLPPLADRTIEPGDRLLLRVTRSDLLRLQQEHTIQLA-KRNLNDSINPFERFVVEGQKTVEVLLPAGSTLAGASLRELRFRQRHNATVLALRRGQQTVQERLGQAILHEGDVLLLQA…
	30916	GC_00000532	HL+LL Core	EQPAC1	4020	ECG	59919.PMM0083	)-transporter	G3DSA:3.30.70.1450	G3DSA:3.30.70.1450							S|G	S|G			COG0471|COG0471|COG3273|COG3273	Di- and tricarboxylate transporter|Di- and tricarboxylate transporter|Uncharacterized conserved protein, contains PhoU and TrkA_C domains|Uncharacterized conserved protein, contains PhoU and TrkA_C domains					PF03600	Citrate transporter	PS51202	RCK C-terminal domain profile.			SSF116726	SSF116726	PS01271	Sodium:sulfate symporter family signature.	MWPIVYRYIELNKFDMNLISFFSNNLDALITVLVLFLSLILFIKNTIAPELTGLLCVGIFIVTGVLTPEKALSGFGSPSLITLMGLFAVSSALFKSGALDRVRELISSENIKTPRKLILLITFLIAPISGIVPNTPVVASLLPLIEGWCERRNISPSKVLLPLSFATLLGGTLTLLGSSVNLLVSDISQQLGYGSLELFSLTSIGIPVWLIGTTYMILVSDVLLPDRGRNK-DFIKNGNMNIYFTEVTIPSSSELVGQSVRNSRLQRRFDVDVLELQRNGKVILPPLADRKFEPEDRLIVRVTRADLLRLQQEHTILLAENKRSIVGTNLLSN--EEGTKTFEALLPSGSTLAGASLRELRFRQRHNATVLALRRGQQTVQERLGQAVLRAGDVLLLQA…
	30903	GC_00000532	HL+LL Core	GP2	5823	ECG	74546.PMT9312_0086	)-transporter	G3DSA:3.30.70.1450	G3DSA:3.30.70.1450							S|G	S|G			COG0471|COG0471|COG3273|COG3273	Di- and tricarboxylate transporter|Di- and tricarboxylate transporter|Uncharacterized conserved protein, contains PhoU and TrkA_C domains|Uncharacterized conserved protein, contains PhoU and TrkA_C domains					PF03600	Citrate transporter	PS51202	RCK C-terminal domain profile.			SSF116726	SSF116726	PS01271	Sodium:sulfate symporter family signature.	---------------MNLIAVVSNNFDAFITVVVLIMSIILFIKNSIAPELTGLLCVGIFIATGVLSPEKALAGFGSPSLITLMGLFAVSSALFKSGALDRVRELISSESIRTPRKLISLIAFLIAPISGIVPNTPVVASLLPLIEGWCERRNISPSKVLLPLSFATLLGGTLTLLGSSVNLLVSDISQQLGYGALELFSLTSIGIPVWLIGTTYMILVSDILLPDRGRDK-DFIRNGDMNIYFTEVTIPSSSELVGQSVRNSRLQRRFDVDVLELQRNGKVILPPLADRKIEPDDRLIIRVTRADLLRLQQEHTILLGENKKSLAGTNVFSD--DEGTKTFEALLPAGSTLAGASLRELRFRQRHNATVLALRRGQQTVQERLGQAVLRAGDVLLLQA…
	30910	GC_00000532	HL+LL Core	LG	8437	NA	167539.Pro0097	)-transporter	G3DSA:3.30.70.1450	G3DSA:3.30.70.1450							S|G	S|G			COG0471|COG0471|COG3273|COG3273	Di- and tricarboxylate transporter|Di- and tricarboxylate transporter|Uncharacterized conserved protein, contains PhoU and TrkA_C domains|Uncharacterized conserved protein, contains PhoU and TrkA_C domains					PF03600	Citrate transporter	PS51202	RCK C-terminal domain profile.			SSF116726	SSF116726			---------------MNELIVVLDNPQALITLGVLFIAVLLFISGWLAPELTGLLSVALLMATGVLEPQKALAGFGSPALITLMGLFAVSAALFKSGALDRLRELIAFESIKTPRRLIGVLGFVVAPISGIVPNTPVVASLLPVIEAWCVKRNISPSRVLLPLSFATLLGGTLTLLGSSVNLLVSDISAQLGYGPLELFSFTAIGIPIWFIGTIYLLLAPQSLLPDRGREKSDFGSRPDQTGYFTEVTIPIDSELVGQSLRNSRLQRRFDVDVLELQRGKERLLPPLADRTIEPGDRLLLRVTRSDLLRLQQEHTIQLA-KRNLNDSINPFERFVVEGQKTVEVLLPAGSTLAGASLRELRFRQRHNATVLALRRGQQTVQERLGQAILHEGDVLLLQA…
	30908	GC_00000532	HL+LL Core	MED4	9337	ECG	59919.PMM0083	)-transporter	G3DSA:3.30.70.1450	G3DSA:3.30.70.1450							S|G	S|G			COG0471|COG0471|COG3273|COG3273	Di- and tricarboxylate transporter|Di- and tricarboxylate transporter|Uncharacterized conserved protein, contains PhoU and TrkA_C domains|Uncharacterized conserved protein, contains PhoU and TrkA_C domains					PF03600	Citrate transporter	PS51202	RCK C-terminal domain profile.			SSF116726	SSF116726	PS01271	Sodium:sulfate symporter family signature.	MWPIVYRYIELNKFDMNLISFFSNNLDALITVLVLFLSLILFIKNTIAPELTGLLCVGIFIVTGVLTPEKALSGFGSPSLITLMGLFAVSSALFKSGALDRVRELISSENIKTPRKLILLITFLIAPISGIVPNTPVVASLLPLIEGWCERRNISPSKVLLPLSFATLLGGTLTLLGSSVNLLVSDISQQLGYGSLELFSLTSIGIPVWLIGTTYMILVSDVLLPDRGRNK-DFIKNGNMNIYFTEVTIPSSSELVGQSVRNSRLQRRFDVDVLELQRNGKVILPPLADRKFEPEDRLIVRVTRADLLRLQQEHTILLAENKRSIVGTNLLSN--EEGTKTFEALLPSGSTLAGASLRELRFRQRHNATVLALRRGQQTVQERLGQAVLRAGDVLLLQA…
	30901	GC_00000532	HL+LL Core	MIT9107	12925	ECG	74546.PMT9312_0086	)-transporter	G3DSA:3.30.70.1450	G3DSA:3.30.70.1450							S|G	S|G			COG0471|COG0471|COG3273|COG3273	Di- and tricarboxylate transporter|Di- and tricarboxylate transporter|Uncharacterized conserved protein, contains PhoU and TrkA_C domains|Uncharacterized conserved protein, contains PhoU and TrkA_C domains					PF03600	Citrate transporter	PS51202	RCK C-terminal domain profile.			SSF116726	SSF116726	PS01271	Sodium:sulfate symporter family signature.	---------------MNLIAVVSNNHDAFITVVVLIMSIILFIKNTIAPELTGLLCVGIFIATGVLSPEKALAGFGSPSLITLMGLFAVSSALFKSGALDRVRELISSESIRTPRKLISLIAFLIAPISGIVPNTPVVASLLPLIEGWCERRNISPSKVLLPLSFATLLGGTLTLLGSSVNLLVSDISQQLGYGALELFSLTSIGIPVWLIGTTYMILFSGMLLPDRGRNK-DFIKNGDMNIYFTEVTIPSASELVGQSVRNSRLQRRFDVDVLELQRNGKVILPPLADRKIEPDDRLIIRVTRADLFRLQQEHTILLGENKTSFGEANVFSD--DEGTKTFEALLPSGSTLAGASLRELRFRQRHNATVLALRRGQQTVQERLGQAVLRAGDVLLLQA…
	30900	GC_00000532	HL+LL Core	MIT9116	14922	ECG	74546.PMT9312_0086	)-transporter	G3DSA:3.30.70.1450	G3DSA:3.30.70.1450							S|G	S|G			COG0471|COG0471|COG3273|COG3273	Di- and tricarboxylate transporter|Di- and tricarboxylate transporter|Uncharacterized conserved protein, contains PhoU and TrkA_C domains|Uncharacterized conserved protein, contains PhoU and TrkA_C domains					PF03600	Citrate transporter	PS51202	RCK C-terminal domain profile.			SSF116726	SSF116726	PS01271	Sodium:sulfate symporter family signature.	---------------MNLIAVVSNNHDAFITVVVLIMSIILFIKNTIAPELTGLLCVGIFIATGVLSPEKALAGFGSPSLITLMGLFAVSSALFKSGALDRVRELISSESIRTPRKLISLIAFLIAPISGIVPNTPVVASLLPLIEGWCERRNISPSKVLLPLSFATLLGGTLTLLGSSVNLLVSDISQQLGYGALELFSLTSIGIPVWLIGTTYMILFSGMLLPDRGRNK-DFIKNGDMNIYFTEVTIPSASELVGQSVRNSRLQRRFDVDVLELQRNGKVILPPLADRKIEPDDRLIIRVTRADLFRLQQEHTILLGENKTSFGEANVFSD--DEGTKTFEALLPSGSTLAGASLRELRFRQRHNATVLALRRGQQTVQERLGQAVLRAGDVLLLQA…
	30904	GC_00000532	HL+LL Core	MIT9123	15210	ECG	74546.PMT9312_0086	)-transporter	G3DSA:3.30.70.1450	G3DSA:3.30.70.1450							S|G	S|G			COG0471|COG0471|COG3273|COG3273	Di- and tricarboxylate transporter|Di- and tricarboxylate transporter|Uncharacterized conserved protein, contains PhoU and TrkA_C domains|Uncharacterized conserved protein, contains PhoU and TrkA_C domains					PF03600	Citrate transporter	PS51202	RCK C-terminal domain profile.			SSF116726	SSF116726	PS01271	Sodium:sulfate symporter family signature.	---------------MNLIAVVSNNHDAFITVVVLIMSIILFIKNTIAPELTGLLCVGIFIATGVLSPEKALAGFGSPSLITLMGLFAVSSALFKSGALDRVRELISSESIRTPRKLISLIAFLIAPISGIVPNTPVVASLLPLIEGWCERRNISPSKVLLPLSFATLLGGTLTLLGSSVNLLVSDISQQLGYGALELFSLTSIGIPVWLIGTTYMILFSGMLLPDRGRNK-DFIKNGDMNIYFTEVTIPSASELVGQSVRNSRLQRRFDVDVLELQRNGKVILPPLADRKIEPDDRLIIRVTRADLFRLQQEHTILLGENKTSFGEANVFSD--DEGTKTFEALLPSGSTLAGASLRELRFRQRHNATVLALRRGQQTVQERLGQAVLRAGDVLLLQA…
	30906	GC_00000532	HL+LL Core	MIT9201	18719	ECG	146891.A9601_00961	)-transporter	G3DSA:3.30.70.1450	G3DSA:3.30.70.1450							S|G	S|G			COG0471|COG0471|COG3273|COG3273	Di- and tricarboxylate transporter|Di- and tricarboxylate transporter|Uncharacterized conserved protein, contains PhoU and TrkA_C domains|Uncharacterized conserved protein, contains PhoU and TrkA_C domains					PF03600	Citrate transporter	PS51202	RCK C-terminal domain profile.			SSF116726	SSF116726	PS01271	Sodium:sulfate symporter family signature.	---------------MNFIAVVSNNFDSFITVVVLIMSIILFIKNTIAPELTGLLCVGIFIATGVLSPEKALAGFGSPSLITLMGLFAVSSALFKSGALDRVRELISSESIRTPRKLISLIAFLIAPISGIVPNTPVVASLLPLIEGWCERRNISPSKVLLPLSFATLLGGTLTLLGSSVNLLVSEISQQLGYGALELFSLTSIGIPVWLIGTTYMILVSDLLLPDRGRDK-EFIKNGDMNIYFTEVTIPPNSELVGQSVRNSRLQRRFDVDVLELQRNGKVILPPLADRKIEPDDRLIIRVTRADLFRLQQEHTILLGENKTSFDGTNVFSD--DEGTKTFEALLPAGSTLAGASLRELRFRQRHNATVLALRRGQQTVQERLGQAVLRAGDVLLLQA…
	30913	GC_00000532	HL+LL Core	MIT9202	19728	ECG	93060.P9215_00961	)-transporter	G3DSA:3.30.70.1450	G3DSA:3.30.70.1450							S|G	S|G			COG0471|COG0471|COG3273|COG3273	Di- and tricarboxylate transporter|Di- and tricarboxylate transporter|Uncharacterized conserved protein, contains PhoU and TrkA_C domains|Uncharacterized conserved protein, contains PhoU and TrkA_C domains					PF03600	Citrate transporter	PS51202	RCK C-terminal domain profile.			SSF116726	SSF116726	PS01271	Sodium:sulfate symporter family signature.	---------------MNLISVVSNNFDALITVVVLIMSIILFIKNTIAPELTGLLCVGIFIATGVLPPDKALAGFGSPSLITLMGLFAVSSALFKSGALDRVRELISSESIRTPRKLISLIAFLIAPISGIVPNTPVVASLLPLIEGWCERRNISPSKVLLPLSFATLLGGTLTLLGSSVNLLVSDISQQLGYGALELFSLTSIGIPVWLIGTTYMILVSDVLLPDRGRDK-EFIKNGDMNIYFTEVTIPSTSELVGQSVRNSRLQRRFDVDVLELQRNGKVILPPLADIKIEPDDRLIIRVTRADLFRLQQEHTILLGENKTSFDGANIFSD--DEGTKTFEALLPAGSTLAGASLRELRFRQRHNATVLALRRGQQTVQERLGQAVLRAGDVLLLQA…
	30918	GC_00000532	HL+LL Core	MIT9211	20822	NA	93059.P9211_00921	)-transporter	G3DSA:3.30.70.1450	G3DSA:3.30.70.1450							S|G	S|G			COG0471|COG0471|COG3273|COG3273	Di- and tricarboxylate transporter|Di- and tricarboxylate transporter|Uncharacterized conserved protein, contains PhoU and TrkA_C domains|Uncharacterized conserved protein, contains PhoU and TrkA_C domains					PF03600	Citrate transporter	PS51202	RCK C-terminal domain profile.			SSF116726	SSF116726	PS01271	Sodium:sulfate symporter family signature.	---------------MDELIVVLENPQALITLGVLVLAVVLFISGLLAPELTGLLSVALLMATGVLSPHKALSGFGSPALITLMGLFAVSAALFKSGALDRLREFIASESIRTPRRLIAFLGFIVAPISGIVPNTPVVASLLPVIEAWCFKRKLSPSRVLLPLSFATVLGGTLTLLGSSVNLLVSDISQQLGYGSLELFSFTAIGVPIWLVGTAYLLLAPQRLLPDRGRDNGEFGGSADQTGYFTEVTIPIDSDLVGQSLHNSRLQRRFDVDVLELQRGKERLLPPLADRTIEPGDRLLLRVTRADLLRLQQEHTVQLAKQNFVNASEEQVEPFLREGQKTVEVLLPAGSTLAGASLRELRFRQRHNATVLALRRGQQTVQERLGQAILREGDVLLLQA…
	30915	GC_00000532	HL+LL Core	MIT9215	22572	ECG	93060.P9215_00961	)-transporter	G3DSA:3.30.70.1450	G3DSA:3.30.70.1450							S|G	S|G			COG0471|COG0471|COG3273|COG3273	Di- and tricarboxylate transporter|Di- and tricarboxylate transporter|Uncharacterized conserved protein, contains PhoU and TrkA_C domains|Uncharacterized conserved protein, contains PhoU and TrkA_C domains					PF03600	Citrate transporter	PS51202	RCK C-terminal domain profile.			SSF116726	SSF116726	PS01271	Sodium:sulfate symporter family signature.	---------------MNLISVVSNNFDALITVVVLIMSIILFIKNTIAPELTGLLCVGIFIATGVLPPEKALAGFGSPSLITLMGLFAVSSALFKSGALDRVRELISSESIRTPRKLISLIAFLIAPISGIVPNTPVVASLLPLIEGWCERRNISPSKVLLPLSFATLLGGTLTLLGSSVNLLVSDISQQLGYGALELFSLTSIGIPVWLIGTIYMILVSDVLLPDRGRDK-EFIKNGDMNIYFTEVTIPSASELVGQSVRNSRLQRRFDVDVLELQRKGKVILPPLADIKIEPDDRLIIRVTRADLFRLQQEHTILLGENKTSFDGANIFSD--DEGTKTFEALLPAGSTLAGASLRELRFRQRHNATVLALRRGQQTVQERLGQAVLRAGDVLLLQA…
	30914	GC_00000532	HL+LL Core	MIT9301	24523	ECG	167546.P9301_00951	)-transporter	G3DSA:3.30.70.1450	G3DSA:3.30.70.1450							S|G	S|G			COG0471|COG0471|COG3273|COG3273	Di- and tricarboxylate transporter|Di- and tricarboxylate transporter|Uncharacterized conserved protein, contains PhoU and TrkA_C domains|Uncharacterized conserved protein, contains PhoU and TrkA_C domains					PF03600	Citrate transporter	PS51202	RCK C-terminal domain profile.			SSF116726	SSF116726	PS01271	Sodium:sulfate symporter family signature.	---------------MNLIAVISNNFDAFITVVVLIMSIILFIRNTIAPELTGLLCVGIFISTGVLSPEKALAGFGSPSLITLMGLFAVSSALFKSGALDRVRELISSESIRTPRKLISLIAFLIAPISGIVPNTPVVASLLPLIESWCERRNISPSKVLLPLSFATLLGGTLTLLGSSVNLLVSDISQQLGYGGLELFSLTSIGIPVWLIGTTYMILFSEMLLPDRGRDK-EFIKNGDMNIYFTEVTIPSTSELVGQSVRNSRLQRRFDVDVLELQRNGKVILPPLADRKIEPDDRLIIRVTRADLFRLQQEHTILLGENKTSFDGANVFSD--DEGTKTFEALLPAGSTLAGASLRELRFRQRHNATVLALRRGQQTVQERLGQAVLRAGDVLLLQA…
	30912	GC_00000532	HL+LL Core	MIT9302	26428	ECG	74546.PMT9312_0086	)-transporter	G3DSA:3.30.70.1450	G3DSA:3.30.70.1450							S|G	S|G			COG0471|COG0471|COG3273|COG3273	Di- and tricarboxylate transporter|Di- and tricarboxylate transporter|Uncharacterized conserved protein, contains PhoU and TrkA_C domains|Uncharacterized conserved protein, contains PhoU and TrkA_C domains					PF03600	Citrate transporter	PS51202	RCK C-terminal domain profile.			SSF116726	SSF116726	PS01271	Sodium:sulfate symporter family signature.	---------------MNLIAVVSNNYDAFITVVVLMMSIILFIKNTIAPELTGLLCVGIFISTGVLSPEKALAGFGSPSLITLMGLFAVSSALFKSGALDRVRELIASESIRTPRKLISLIAFLVAPISGIVPNTPVVASLLPLIEGWCERRNISPSKVLLPLSFATLLGGTLTLLGSSVNLLVSDISQQLGYGALELFSLTSIGIPVWLIGTTYMILVSDMLLPDRGRDK-DFIKKGDMNIYFTEVTIPSASELVGQSVRNSRLQRRFDVDVLELQRNGKVILPPLADRKIEPDDRLIIRVTRADLFRLQQEHTILLGENKTSFGGANVFSD--DEGTKTFEALLPAGSTLAGASLRELRFRQRHNATVLALRRGQQTVQERLGQAVLRAGDVLLLQA…
	30893	GC_00000532	HL+LL Core	MIT9303	28479	ECG	74547.PMT1627	)-transporter	G3DSA:3.30.70.1450	G3DSA:3.30.70.1450							S|G	S|G			COG0471|COG0471|COG3273|COG3273	Di- and tricarboxylate transporter|Di- and tricarboxylate transporter|Uncharacterized conserved protein, contains PhoU and TrkA_C domains|Uncharacterized conserved protein, contains PhoU and TrkA_C domains					PF03600	Citrate transporter	PS51202	RCK C-terminal domain profile.			SSF116726	SSF116726	PS01271	Sodium:sulfate symporter family signature.	---------------MAVLSTAIQNPQALITLAVLLLAVVLFISGALAPELTGLLSMALLMATGVLTPQQALAGFGRPALITLMGLFAVSAALFRSGALDRVRELIASERIRSPRRLIALLGLVVAPISSVLPNTPVVASLLPVIEAWCHRRRISPSKVLLPLSFAALFGSTLTLLGSSVNLLVSDISEQLGNGSLELFSFTAIGVPIWLAGTTYLMLAPQALLPDRGSNSDELGDNKDQTGYFTEVTIPQNSQLVGQSLHNSRLQRRFDVDVLELQRGRERLLPPLADRRLEPGDRLLLRVTRADLLRLQQEHNVQLA-TRESIAPSSLSPSGLGEGQRTVEVLLPAGSTLAGASLRELRFRQRHNATVLALRRGQQTVQERLGQAVLREGDVLLLQA…
	30921	GC_00000532	HL+LL Core	MIT9311	32261	ECG	74546.PMT9312_0086	)-transporter	G3DSA:3.30.70.1450	G3DSA:3.30.70.1450							S|G	S|G			COG0471|COG0471|COG3273|COG3273	Di- and tricarboxylate transporter|Di- and tricarboxylate transporter|Uncharacterized conserved protein, contains PhoU and TrkA_C domains|Uncharacterized conserved protein, contains PhoU and TrkA_C domains					PF03600	Citrate transporter	PS51202	RCK C-terminal domain profile.			SSF116726	SSF116726	PS01271	Sodium:sulfate symporter family signature.	---------------MNLIAVVSNNYYAFITVVVLMMSIILFIKNTIAPELTGLLCVGIFITTGVLSPEKALAGFGSPSLITLMGLFAVSSALFKSGALDRVRELISSESIRTPRKLISLIAFLIAPISGIVPNTPVVASLLPLIEGWCERRNISPSKVLLPLSFATLLGGTLTLLGSSVNLLVSDISQQLGYGALELFSLTAIGIPVWLIGTTYMIIVSDLLLPDRGRDK-DFIKNGDMNIYFTEVTIPSSSELVGQSVRNSRLQRRFDVDVLELQRNGKVILPPLADRKIEPDDRLIIRVTRADLFRLQQEHTILLGENKTSFGGANVFSD--DEGTKTFEALLPAGSTLAGASLRELRFRQRHNATVLALRRGQQTVQERLGQAVLRAGDVLLLQA…
	30907	GC_00000532	HL+LL Core	MIT9312	32952	ECG	74546.PMT9312_0086	)-transporter	G3DSA:3.30.70.1450	G3DSA:3.30.70.1450							S|G	S|G			COG0471|COG0471|COG3273|COG3273	Di- and tricarboxylate transporter|Di- and tricarboxylate transporter|Uncharacterized conserved protein, contains PhoU and TrkA_C domains|Uncharacterized conserved protein, contains PhoU and TrkA_C domains					PF03600	Citrate transporter	PS51202	RCK C-terminal domain profile.			SSF116726	SSF116726	PS01271	Sodium:sulfate symporter family signature.	---------------MNLIAVVSNNYYAFITVVVLMMSIILFIKNTIAPELTGLLCVGIFITTGVLSPEKALAGFGSPSLITLMGLFAVSSALFKSGALDRVRELISSESIRTPRKLISLIAFLIAPISGIVPNTPVVASLLPLIEGWCERRNISPSKVLLPLSFATLLGGTLTLLGSSVNLLVSDISQQLGYGALELFSLTAIGIPVWLIGTTYMIIVSDLLLPDRGRDK-DFIKNGDMNIYFTEVTIPSSSELVGQSVRNSRLQRRFDVDVLELQRNGKVILPPLADRKIEPDDRLIIRVTRADLFRLQQEHTILLGENKTSFGGANVFSD--DEGTKTFEALLPAGSTLAGASLRELRFRQRHNATVLALRRGQQTVQERLGQAVLRAGDVLLLQA…
	30899	GC_00000532	HL+LL Core	MIT9313	36618	ECG	74547.PMT1627	)-transporter	G3DSA:3.30.70.1450	G3DSA:3.30.70.1450							S|G	S|G			COG0471|COG0471|COG3273|COG3273	Di- and tricarboxylate transporter|Di- and tricarboxylate transporter|Uncharacterized conserved protein, contains PhoU and TrkA_C domains|Uncharacterized conserved protein, contains PhoU and TrkA_C domains					PF03600	Citrate transporter	PS51202	RCK C-terminal domain profile.			SSF116726	SSF116726	PS01271	Sodium:sulfate symporter family signature.	---------------MAVLSTAIQNPQALITLAVLLLAVVLFISGALAPELTGLLSMAMLMATGVLTPQQALAGFGRPALITLMGLFAVSAALFRSGALDRVRELIASERIRSPRRLIALLGLVVAPISSVLPNTPVVASLLPVIEAWCHRRRISPSKVLLPLSFAALFGSTLTLLGSSVNLLVSDISEQLGNGSLELFSFTAIGVPIWLAGTTYLMLAPQALLPDRGSNSDELGDNKDQTGYFTEVTIPQNSQLVGQSLHNSRLQRRFDVDVLELQRGRERLLPPLADRRLEPGDRLLLRVTRADLLRLQQEHNVQLA-TRESIAPSSLSPSSLGEGQRTVEVLLPAGSTLAGASLRELRFRQRHNATVLALRRGQQTVQERLGQAVLREGDVLLLQA…
	30898	GC_00000532	HL+LL Core	MIT9314	38412	ECG	146891.A9601_00961	)-transporter	G3DSA:3.30.70.1450	G3DSA:3.30.70.1450							S|G	S|G			COG0471|COG0471|COG3273|COG3273	Di- and tricarboxylate transporter|Di- and tricarboxylate transporter|Uncharacterized conserved protein, contains PhoU and TrkA_C domains|Uncharacterized conserved protein, contains PhoU and TrkA_C domains					PF03600	Citrate transporter	PS51202	RCK C-terminal domain profile.			SSF116726	SSF116726	PS01271	Sodium:sulfate symporter family signature.	---------------MNLIAVVSNNFDAFITVVVLIMSIILFIRNTIAPELTGLLCVGIFISTGVLSPEKALAGFGSPSLITLMGLFAVSSALFKSGALDRVRELISSESIRTPRKLISLIAFLIAPISGIVPNTPVVASLLPLIESWCERRNISPSKVLLPLSFATLLGGTLTLLGSSVNLLVSDISQQLGYGGLELFSLTSIGIPVWLIGTTYMILVSDMLLPDRGRDK-DFIKNGDMNIYFTEVTIPSTSELVGQSVRNSRLQRRFDVDVLELQRNGKVILPPLADRKIEPDDRLIIRVTRADLFRLQQEHTILLGENKTSFDGANVFSD--DEGTKTFEALLPAGSTLAGASLRELRFRQRHNATVLALRRGQQTVQERLGQAVLRAGDVLLLQA…
	30905	GC_00000532	HL+LL Core	MIT9321	39427	ECG	74546.PMT9312_0086	)-transporter	G3DSA:3.30.70.1450	G3DSA:3.30.70.1450							S|G	S|G			COG0471|COG0471|COG3273|COG3273	Di- and tricarboxylate transporter|Di- and tricarboxylate transporter|Uncharacterized conserved protein, contains PhoU and TrkA_C domains|Uncharacterized conserved protein, contains PhoU and TrkA_C domains					PF03600	Citrate transporter	PS51202	RCK C-terminal domain profile.			SSF116726	SSF116726	PS01271	Sodium:sulfate symporter family signature.	---------------MNLIALVSNNFDAFITVVVLIMSIILFIKNTIAPELTGLLCVGIFIATGVLSPEKALAGFGSPSLITLMGLFAVSSALFKSGALDRVRELISSESIRTPRKLISLIAFLIAPISGIVPNTPVVASLLPLIEGWCERRNISPSKVLLPLSFATLLGGTLTLLGSSVNLLVSDISQQLGYGALELFSLTSIGIPVWLIGTTYMILVSDMLLPDRGRDK-EFIKNGDMNIYFTEVTIPSTSELVGQSVRNSRLQRRFDVDVLELQRNGKVILPPLADRKIEPDDRLIIRVTRADLFRLQQEHTILLGENKTSFDGANVFSD--DEGTKTFEALLPAGSTLAGASLRELRFRQRHNATVLALRRGQQTVQERLGQAVLRAGDVLLLQA…
	30896	GC_00000532	HL+LL Core	MIT9322	41565	ECG	74546.PMT9312_0086	)-transporter	G3DSA:3.30.70.1450	G3DSA:3.30.70.1450							S|G	S|G			COG0471|COG0471|COG3273|COG3273	Di- and tricarboxylate transporter|Di- and tricarboxylate transporter|Uncharacterized conserved protein, contains PhoU and TrkA_C domains|Uncharacterized conserved protein, contains PhoU and TrkA_C domains					PF03600	Citrate transporter	PS51202	RCK C-terminal domain profile.			SSF116726	SSF116726	PS01271	Sodium:sulfate symporter family signature.	---------------MNLIALVSNNFDAFITVVVLIMSIILFIKNTIAPELTGLLCVGIFIATGVLSPEKALAGFGSPSLITLMGLFAVSSALFKSGALDRVRELISSESIRTPRKLISLIAFLIAPISGIVPNTPVVASLLPLIEGWCERRNISPSKVLLPLSFATLLGGTLTLLGSSVNLLVSDISQQLGYGALELFSLTSIGIPVWLIGTTYMILVSDMLLPDRGRDK-EFIKNGDMNIYFTEVTIPSTSELVGQSVRNSRLQRRFDVDVLELQRNGKVILPPLADRKIEPDDRLIIRVTRADLFRLQQEHTILLGENKTSFDGANVFSD--DEGTKTFEALLPAGSTLAGASLRELRFRQRHNATVLALRRGQQTVQERLGQAVLRAGDVLLLQA…
	30917	GC_00000532	HL+LL Core	MIT9401	44836	ECG	74546.PMT9312_0086	)-transporter	G3DSA:3.30.70.1450	G3DSA:3.30.70.1450							S|G	S|G			COG0471|COG0471|COG3273|COG3273	Di- and tricarboxylate transporter|Di- and tricarboxylate transporter|Uncharacterized conserved protein, contains PhoU and TrkA_C domains|Uncharacterized conserved protein, contains PhoU and TrkA_C domains					PF03600	Citrate transporter	PS51202	RCK C-terminal domain profile.			SSF116726	SSF116726	PS01271	Sodium:sulfate symporter family signature.	---------------MNLIALVSNNFDAFITVVVLIMSIILFIKNTIAPELTGLLCVGIFIATGVLSPEKALAGFGSPSLITLMGLFAVSSALFKSGALDRVRELISSESIRTPRKLISLIAFLIAPISGIVPNTPVVASLLPLIEGWCERRNISPSKVLLPLSFATLLGGTLTLLGSSVNLLVSDISQQLGYGALELFSLTSIGIPVWLIGTTYMILVSDMLLPDRGRDK-EFIKNGDMNIYFTEVTIPSTSELVGQSVRNSRLQRRFDVDVLELQRNGKVILPPLADRKIEPDDRLIIRVTRADLFRLQQEHTILLGENKTSFDGANVFSD--DEGTKTFEALLPAGSTLAGASLRELRFRQRHNATVLALRRGQQTVQERLGQAVLRAGDVLLLQA…
	30897	GC_00000532	HL+LL Core	MIT9515	44997	ECG	167542.P9515_00931	)-transporter	G3DSA:3.30.70.1450	G3DSA:3.30.70.1450							S|G	S|G			COG0471|COG0471|COG3273|COG3273	Di- and tricarboxylate transporter|Di- and tricarboxylate transporter|Uncharacterized conserved protein, contains PhoU and TrkA_C domains|Uncharacterized conserved protein, contains PhoU and TrkA_C domains					PF03600	Citrate transporter	PS51202	RCK C-terminal domain profile.			SSF116726	SSF116726	PS01271	Sodium:sulfate symporter family signature.	---------------MNLFSLFSNNFDALITVLVLLLSLILFIRNTIAPELTGLLCVGIFIVTGVLTPEKALAGFGSPSLITLMGLFAVSSALFKSGALDRVRELISSENIKTPRRLITLITFLIAPISGIVPNTPVVASLLPLIEGWCERRNISPSKVLLPLSFATLLGGTLTLLGSSVNLLVSDISQQLGYGSLELFSLTSIGIPVWLIGTTYMIMVSDVLLPDRGRNK-DFIKKGNMNIYFTEVTIPSSSELVGQSVRNSRLQRRFDVDVLELQRNGEVILPPLADRKFEPEDRLIVRVTRADLLRLQQEHTILLAENRRSLSGTNLLST--EEGTKTFEALLPAGSTLAGASLRELRFRQRHNATVLALRRGQQTVQERLGQAVLRAGDVLLLQA…
	30920	GC_00000532	HL+LL Core	NATL1A	46919	ECG	167555.NATL1_01481	)-transporter	G3DSA:3.30.70.1450	G3DSA:3.30.70.1450							S|G	S|G			COG0471|COG0471|COG3273|COG3273	Di- and tricarboxylate transporter|Di- and tricarboxylate transporter|Uncharacterized conserved protein, contains PhoU and TrkA_C domains|Uncharacterized conserved protein, contains PhoU and TrkA_C domains					PF03600	Citrate transporter	PS51202	RCK C-terminal domain profile.			SSF116726	SSF116726	PS01271	Sodium:sulfate symporter family signature.	---------------MNEISTVLDNPKAVITLAVLIIAVFLFVSSALAPELTGLLSVALLMATGVLSPQKALAGFGSPALITLMGLFAVSAALFKSGALDRLRELIASESIRTPRRLIALLGLVVAPVSGVVPNTPVVASLLPVIEAWCVKRKLSPSRVLLPLSFATVLGGTLTLLGSSVNLLVSDISDQLGYGPFDLFTFTAIGVPIWLFGTAYMLLAPQSLLPDRGRISSEYGGSSDQTGYFTEVTIPSDSELVGHSLRNSRLQRRFDVDVLEIQRENEILLPPLADRIIQSGDRLLIRITRSDLLRLKQEHTVQL--NKNLNIEKNFFLSNIDESQQTVEVLLPAGSTLAGASLRELRFRQRHNATVLALRRGQQTVQERLGQAILREGDVLLLQA…
	30895	GC_00000532	HL+LL Core	NATL2A	48934	ECG	167555.NATL1_01481	)-transporter	G3DSA:3.30.70.1450	G3DSA:3.30.70.1450							S|G	S|G			COG0471|COG0471|COG3273|COG3273	Di- and tricarboxylate transporter|Di- and tricarboxylate transporter|Uncharacterized conserved protein, contains PhoU and TrkA_C domains|Uncharacterized conserved protein, contains PhoU and TrkA_C domains					PF03600	Citrate transporter	PS51202	RCK C-terminal domain profile.			SSF116726	SSF116726	PS01271	Sodium:sulfate symporter family signature.	---------------MNEIFTVLENPKAVITLAVLIIAVFLFVSSALAPELTGLLSVALLMATGVLSPQKALAGFGSPALITLMGLFAVSAALFKSGALDRLRELIASDSIRTPRRLIALLGLVVAPVSGVVPNTPVVASLLPVIEAWCVKRKLSPSRVLLPLSFATVLGGTLTLLGSSVNLLVSDISDQLGYGPFDLFTFTAIGVPIWLFGTAYMLLAPQSLLPDRGRISSEYGGSSDQTGYFTEVTIPSDSELVGHSLRNSRLQRRFDVDVLEIQRENEILLPPLADRIIQSGDRLLIRITRSDLLRLKQEHTVQL--NKNLSIEKKFFLSNIDESQQTVEVLLPAGSTLAGASLRELRFRQRHNATVLALRRGQQTVQERLGQAILREGDVLLLQA…
	30894	GC_00000532	HL+LL Core	PAC1	51241	ECG	167555.NATL1_01481	)-transporter	G3DSA:3.30.70.1450	G3DSA:3.30.70.1450							S|G	S|G			COG0471|COG0471|COG3273|COG3273	Di- and tricarboxylate transporter|Di- and tricarboxylate transporter|Uncharacterized conserved protein, contains PhoU and TrkA_C domains|Uncharacterized conserved protein, contains PhoU and TrkA_C domains					PF03600	Citrate transporter	PS51202	RCK C-terminal domain profile.			SSF116726	SSF116726	PS01271	Sodium:sulfate symporter family signature.	---------------MNEISTVLENPKAVITLAVLIIAVFLFVSSALAPELTGLLSVALLMATGVLSPQKALAGFGSPALITLMGLFAVSAALFKSGALDRLRELIASESIRTPRRLIALLGLVVAPVSGVVPNTPVVASLLPVIEAWCVKRKLSPSRVLLPLSFATVLGGTLTLLGSSVNLLVSDISDQLGYGPFDLFTFTAIGVPIWLFGTAYMLLAPQSLLPDRGRISSEYGGSSDQTGYFTEVTIPSDSELVGHSLRNSRLQRRFDVDVLEIQRENEILLPPLADRIIQSGDRLLIRITRSDLLRLKQEHTVQL--NKNLNIEKNFFLSNIDESQQTVEVLLPAGSTLAGASLRELRFRQRHNATVLALRRGQQTVQERLGQAILREGDVLLLQA…
	30909	GC_00000532	HL+LL Core	SB	53962	ECG	146891.A9601_00961	)-transporter	G3DSA:3.30.70.1450	G3DSA:3.30.70.1450							S|G	S|G			COG0471|COG0471|COG3273|COG3273	Di- and tricarboxylate transporter|Di- and tricarboxylate transporter|Uncharacterized conserved protein, contains PhoU and TrkA_C domains|Uncharacterized conserved protein, contains PhoU and TrkA_C domains					PF03600	Citrate transporter	PS51202	RCK C-terminal domain profile.			SSF116726	SSF116726	PS01271	Sodium:sulfate symporter family signature.	---------------MNLIAVVSNNFDAFITVVVLIMSIILFIRNTIAPELTGLLCVGIFISTGVLSPEKALAGFGSPSLITLMGLFAVSSALFKSGALDRVRELISSESIRTPRKLISLIAFLIAPISGIVPNTPVVASLLPLIESWCERRNISPSKVLLPLSFATLLGGTLTLLGSSVNLLVSDISQQLGYGGLELFSLTSIGIPVWLIGTTYMILVSDMLLPDRGRDK-EFIKNGDMNIYFTEVTIPSTSELVGQSVRNSRLQRRFDVDVLELQRNGKVILPPLADRKIEPNDRLIIRVTRADLFRLQQEHTILLGENKTSFDGVNFFSD--DEGTKTFEALLPAGSTLAGASLRELRFRQRHNATVLALRRGQQTVQERLGQAVLRAGDVLLLQA…
	30892	GC_00000532	HL+LL Core	SS2	56258	NA	167539.Pro0097	)-transporter	G3DSA:3.30.70.1450	G3DSA:3.30.70.1450							S|G	S|G			COG0471|COG0471|COG3273|COG3273	Di- and tricarboxylate transporter|Di- and tricarboxylate transporter|Uncharacterized conserved protein, contains PhoU and TrkA_C domains|Uncharacterized conserved protein, contains PhoU and TrkA_C domains					PF03600	Citrate transporter	PS51202	RCK C-terminal domain profile.			SSF116726	SSF116726			---------------MNELIVVLDNPQALITLGVLFIAVLLFISGWLAPELTGLLSVALLMATGVLEPQKALAGFGSPALITLMGLFAVSAALFKSGALDRLRELIAFESIKTPRRLIGVLGFVVAPISGIVPNTPVVASLLPVIEAWCVKRNISPSRVLLPLSFATLLGGTLTLLGSSVNLLVSDISAQLGYGPLELFSFTAIGIPIWFIGTIYLLLAPQSLLPDRGREKSDFGSRPDQTGYFTEVTIPIDSELVGQSLRNSRLQRRFDVDVLELQRGKERLLPPLADRTIEPGDRLLLRVTRSDLLRLQQEHTIQLA-KRNLNDSINPFERFVVEGQKTVEVLLPAGSTLAGASLRELRFRQRHNATVLALRRGQQTVQERLGQAILHEGDVLLLQA…
	30919	GC_00000532	HL+LL Core	SS35	57899	NA	167539.Pro0097	)-transporter	G3DSA:3.30.70.1450	G3DSA:3.30.70.1450							S|G	S|G			COG0471|COG0471|COG3273|COG3273	Di- and tricarboxylate transporter|Di- and tricarboxylate transporter|Uncharacterized conserved protein, contains PhoU and TrkA_C domains|Uncharacterized conserved protein, contains PhoU and TrkA_C domains					PF03600	Citrate transporter	PS51202	RCK C-terminal domain profile.			SSF116726	SSF116726			---------------MNELIVVLDNPQALITLGVLFIAVLLFISGWLAPELTGLLSVALLMATGVLEPQKALAGFGSPALITLMGLFAVSAALFKSGALDRLRELIAFESIKTPRRLIGVLGFVVAPISGIVPNTPVVASLLPVIEAWCVKRNISPSRVLLPLSFATLLGGTLTLLGSSVNLLVSDISAQLGYGPLELFSFTAIGIPIWFIGTIYLLLAPQSLLPDRGREKSDFGSRPDQTGYFTEVTIPIDSELVGQSLRNSRLQRRFDVDVLELQRGKERLLPPLADRTIEPGDRLLLRVTRSDLLRLQQEHTIQLA-KRNLNDSINPFERFVVEGQKTVEVLLPAGSTLAGASLRELRFRQRHNATVLALRRGQQTVQERLGQAILHEGDVLLLQA…
	30911	GC_00000532	HL+LL Core	SS51	59192	NA	167539.Pro0097	)-transporter	G3DSA:3.30.70.1450	G3DSA:3.30.70.1450							S|G	S|G			COG0471|COG0471|COG3273|COG3273	Di- and tricarboxylate transporter|Di- and tricarboxylate transporter|Uncharacterized conserved protein, contains PhoU and TrkA_C domains|Uncharacterized conserved protein, contains PhoU and TrkA_C domains					PF03600	Citrate transporter	PS51202	RCK C-terminal domain profile.			SSF116726	SSF116726			---------------MNELIVVLDNPQALITLGVLFIAVLLFISGWLAPELTGLLSVALLMATGVLEPQKALAGFGSPALITLMGLFAVSAALFKSGALDRLRELIAFESIKTPRRLIGVLGFVVAPISGIVPNTPVVASLLPVIEAWCVKRNISPSRVLLPLSFATLLGGTLTLLGSSVNLLVSDISAQLGYGPLELFSFTAIGIPIWFIGTIYLLLAPQSLLPDRGREKSDFGSRPDQTGYFTEVTIPIDSELVGQSLRNSRLQRRFDVDVLELQRGKERLLPPLADRTIEPGDRLLLRVTRSDLLRLQQEHTIQLA-KRNLNDSINPFERFVVEGQKTVEVLLPAGSTLAGASLRELRFRQRHNATVLALRRGQQTVQERLGQAILHEGDVLLLQA…
	29269	GC_00000889		AS9601	1247	ECG	146891.A9601_12891	)-transporter									P	P			COG1914	Mn2+ and Fe2+ transporters of the NRAMP family					PF01566	Natural resistance-associated macrophage protein									----MNLTK-GIQKSLGPGIVLAGAAIGGSHLLSSTTAGARFGFSLVGLILLTNLLKYPFLLVGTRFTASTGKSLLEGFKERNSLYLPLFLVVSLITGTFTIAAVSFVSGVLLTNIPLFSTFPAMDLSIGILIVSGMILILGKYKALDRISKFLVSLLTLLTLFAVLSLLFKGSINESLNMSFFEPEISPWKLTNLAFLIPLMGWMPCPVELCVWPSLWMFSRAKDSNYKPNINEAEFDFNLGYLITVITAIFFLTLGAITMYGTGDGMLSGSGVSFAQKLILLYTKSIGNWAKWIIIPAAFAAMFSTTITCLDAYPRSISAIQGLLRGTDFGHLDSKAERNRFQIWMIVHIFASLIALLIARSGGIGVKDFVFAAMTGSFLTAPLFAWMAMDTINSKL…
	29286	GC_00000889		CCMP1375	3028	NA	167539.Pro1203	)-transporter									P	P			COG1914	Mn2+ and Fe2+ transporters of the NRAMP family					PF01566	Natural resistance-associated macrophage protein	PS51257	Prokaryotic membrane lipoprotein lipid attachment site profile.							----MKLSRQGIQKSLGPGIVLAGACIGGSHLMSSTTAGAKFGFALVGLILLTNLLKYPFLLVGTRFTAVTGLSLLEGFKARNSIYLPLYLVIGLITGTFTIAAVSFVTGLLLTNIPFLSTIPPMDLSIGVLVASGIILLLGHYKALDKISKILVLMLTLLTSFAVISLLQRGSLGN-IDINFIDSNPSPWTLSNLSFLIPLMGWMPGPVELCVWPSLWMFSRSRDTKYTANLQEAEFDFNLGYLITVITSLLFVSLGAFTMYGSGEVMLSESGVSFAQNLIRLYTSSMGDWAKWVIIPASFAAMFSTTLTCLDAYPRSISAVQGLLQGKDRGITSSLSERKRLQFWIVIHIFTSLTALLIAKSGGISVKDFVFGAMTGSFLTAPIFAWMAMDTLNSSL…
	29270	GC_00000889		GP2	6869	ECG	74546.PMT9312_1219	)-transporter									P	P			COG1914	Mn2+ and Fe2+ transporters of the NRAMP family					PF01566	Natural resistance-associated macrophage protein									----MNLTK-GIQKSLGPGILLAGAAIGGSHLLSSTTAGARFGFSLVGLILLTNLLKYPFLLVGTRFTASTGKSLLEGFKEKNTLYLPLFLIVSLITGTFTIAAVSFVSGVLLTNIPFFSGFPAMDLSIGILIVSGMILILGKYKALDRISKFLVSLLTFLTLFAVLSLLFKGSINESLNKSFFEPEISPWKLTNLAFLIPLMGWMPCPVELCVWPSLWMFSRAKDSNHKPNISEAEFDFNLGYVITVVTAIFFLTLGAITMYGTGDGMLSGSGVSFAQKLILLYTKSIGSWAKWIIIPAAFAAMFSTTITCLDAYPRSISAIQGLLRGTDFGHMDSNAERNRFQLWMIVHIFASLIALLIARSGGIGVKDFVFAAMTGSFLTAPLFAWMAMDTINSKL…
	29275	GC_00000889		LG	7909	NA	167539.Pro1203	)-transporter									P	P			COG1914	Mn2+ and Fe2+ transporters of the NRAMP family					PF01566	Natural resistance-associated macrophage protein	PS51257	Prokaryotic membrane lipoprotein lipid attachment site profile.							----MKLSRQGIQKSLGPGIVLAGACIGGSHLMSSTTAGAKFGFALVGLILLTNLLKYPFLLVGTRFTAVTGLSLLEGFKARNSIYLPLYLVIGLITGTFTIAAVSFVTGLLLTNIPFLSTIPPMDLSIGVLVASGIILLLGHYKALDKISKILVLMLTLLTSFAVISLLQRGSLGN-IDINFIDSNPSPWTLSNLSFLIPLMGWMPGPVELCVWPSLWMFSRSRDTKYTANLQEAEFDFNLGYLITVITSLLFVSLGAFTMYGSGEVMLSESGVSFAQNLIRLYTSSMGDWAKWVIIPASFAAMFSTTLTCLDAYPRSISAVQGLLQGKDRGITSSLSERKRLQFWIVIHIFTSLTALLIAKSGGISVKDFVFGAMTGSFLTAPIFAWMAMDTLNSSL…
	29268	GC_00000889		MIT9107	11288	ECG	93060.P9215_13251	)-transporter									P	P			COG1914	Mn2+ and Fe2+ transporters of the NRAMP family					PF01566	Natural resistance-associated macrophage protein									----MNLTK-GIQKSLGPGILLAGAAIGGSHLLSSTTAGARFGFSLVGLILLTNLLKYPFLLVGTRFTASTGKSLLEGFKERNSNYLPLFLIVSLITGTFTIAAVSFISGVLLTNIPIFSAFPAMDLSIGILGVSGMILILGKYKALDRISKFLVALLTFLTLFAVLSLLLKGSINESLNISFFEPEISPWKLTNLAFLIPLMGWMPCPVELCVWPSLWMFSRAKDSNYTPSISEAEFDFNLGYLITVVTAVFFLTLGAITMYGTGDGLLSGSGVSFAQKLILLYTKSIGDWSKWIIIPAAFAAMFSTTITCLDAYPRSISAIQGLLSGTDIGHLNSRTERIRFQRWMIVHILASFIALIIARSGGIGVKDFVFAAMTGSFLTAPLFAWMAMDTINSNL…
	29267	GC_00000889		MIT9116	13170	ECG	93060.P9215_13251	)-transporter									P	P			COG1914	Mn2+ and Fe2+ transporters of the NRAMP family					PF01566	Natural resistance-associated macrophage protein									----MNLTK-GIQKSLGPGILLAGAAIGGSHLLSSTTAGARFGFSLVGLILLTNLLKYPFLLVGTRFTASTGKSLLEGFKERNSNYLPLFLIVSLITGTFTIAAVSFISGVLLTNIPIFSAFPAMDLSIGILGVSGMILILGKYKALDRISKFLVALLTFLTLFAVLSLLLKGSINESLNISFFEPEISPWKLTNLAFLIPLMGWMPCPVELCVWPSLWMFSRAKDSNYTPSISEAEFDFNLGYLITVVTAVFFLTLGAITMYGTGDGLLSGSGVSFAQKLILLYTKSIGDWSKWIIIPAAFAAMFSTTITCLDAYPRSISAIQGLLSGTDIGHLNSRTERIRFQRWMIVHILASFIALIIARSGGIGVKDFVFAAMTGSFLTAPLFAWMAMDTINSNL…
	29271	GC_00000889		MIT9123	15943	ECG	93060.P9215_13251	)-transporter									P	P			COG1914	Mn2+ and Fe2+ transporters of the NRAMP family					PF01566	Natural resistance-associated macrophage protein									----MNLTK-GIQKSLGPGILLAGAAIGGSHLLSSTTAGARFGFSLVGLILLTNLLKYPFLLVGTRFTASTGKSLLEGFKERNSNYLPLFLIVSLITGTFTIAAVSFISGVLLTNIPIFSAFPAMDLSIGILGVSGMILILGKYKALDRISKFLVALLTFLTLFAVLSLLLKGSINESLNISFFEPEISPWKLTNLAFLIPLMGWMPCPVELCVWPSLWMFSRAKDSNYTPSISEAEFDFNLGYLITVVTAVFFLTLGAITMYGTGDGLLSGSGVSFAQKLILLYTKSIGDWSKWIIIPAAFAAMFSTTITCLDAYPRSISAIQGLLSGTDIGHLNSRTERIRFQRWMIVHILASFIALIIARSGGIGVKDFVFAAMTGSFLTAPLFAWMAMDTINSNL…
	29273	GC_00000889		MIT9201	17221	ECG	167546.P9301_12961	)-transporter									P	P			COG1914	Mn2+ and Fe2+ transporters of the NRAMP family					PF01566	Natural resistance-associated macrophage protein									----MNLTK-GIQKSLGPGILLAGAAIGGSHLLSSTTAGARFGFSLVGLILLTNLLKYPFLLVGTRFTASTGKSLLEGFKERNSLYLPLFLVVSLITGTFTIAAVSFVSGVLLTNIPFFSAFPAMDLSIGILIVSGVILILGKYKALDRISKFLVSLLTFLTLFAVLSLLLKGSINDSLNMSFFEPEISPWKLSNLAFLIPLMGWMPCPVELCVWPSLWMFSRSKDSNYKPNINEAEFDFNLGYAVTVITAIFFLTLGAITMYGTGDGMLSGSGVSFAQKLILLYTKSIGDWAKWIIVPAAFAAMFSTTITCLDAYPRSISAIQGLLRGTDFGHMDSKAERTRFQIWMIAHIFASLISLLIARSGGVGVKDFVFAAMTGSFLTAPLFAWMAMDTINSKL…
	29278	GC_00000889		MIT9202	18981	ECG	93060.P9215_13251	)-transporter									P	P			COG1914	Mn2+ and Fe2+ transporters of the NRAMP family					PF01566	Natural resistance-associated macrophage protein									----MNLTK-GIKKSLGPGILLAGAAIGGSHLLSSTTAGARFGFSLLGLILLTNLLKYPFLLVGTRFTASTGKSLLEGFKERNPYYLPLFLIVSLITGTFTIAAVSFVSGVLLTNIPFFKAFPAMDLSIGILIFSGMILILGKYKALDRISKFLVALLTFLTLFAVLSLLLKGSINESLNISFFEPEISPWKLTNLAFLIPLMGWMPCPVELCVWPSLWMFSRAKDSNHTPNISEAEFDL-IWVRNNCCTAIFFLTLGAITMYGTGDGMLTGSGVSFAQKLILLYTKSIGEWSKWIIIPAAFAAMFSTTITCIDAYPRSISAIQGLLRGTDFGHMDSKAERNRFQIWMIAHIFASLIALLIARSGGVGVKDFVFAAMTGSFLTAPLFAWMAMDTINSKL…
	29282	GC_00000889		MIT9211	21857	NA	93059.P9211_11901	)-transporter									P	P			COG1914	Mn2+ and Fe2+ transporters of the NRAMP family					PF01566	Natural resistance-associated macrophage protein	PS51257	Prokaryotic membrane lipoprotein lipid attachment site profile.							----MSLSREGVQKSLGPGILLAGACIGGSHLMSSTTAGARFGFALIGLILLTNLIKYPFLLVGTRFTASTGLSLLEGFQARNPFYLPIYLIVSLITGTFTIAAVSFVSGLLLTNIPLFSQFPPMDLSIGVLVISGVILLLGHYRALDRISKVLVILLTLLTAIAVYSLINRASLSD-ISINLINSDPSPWTLANLSFLIPLMGWMPGPVELCVWPSLWMFSRSKDSNYNASPKEAEFDFNLGYLVTVVTAIFFVTLGALTMYRSGDGMLEGSGVSFAQNLIRLYTEAMGGWAAWIIIPASFAAMFSTTLTCLDAYPRSISATQGLLSGKDRGQLTSKSEQKRLEVWIVLHIFAALSALLIAKSDGIGIKDFVFGAMTGSFLSAPLFAWMAMDTINSNL…
	29280	GC_00000889		MIT9215	23767	ECG	93060.P9215_13251	)-transporter									P	P			COG1914	Mn2+ and Fe2+ transporters of the NRAMP family					PF01566	Natural resistance-associated macrophage protein									----MNLTK-GIKKSLGPGILLAGAAIGGSHLLSSTTAGARFGFSLLGLILLTNLLKYPFLLVGTRFTASTGKSLLEGFKERNPYYLPLFLIVSLITGTFTIAAVSFVSGVLLTNIPFFKAFPAMDLSIGILIFSGMILILGKYKALDRISKFLVALLTFLTLFAVLSLLFKGSINESLNISFFEPEISPWKLTNLAFLIPLMGWMPCPVELCVWPSLWMFSRAKDSNYTPNISEAEFDFNLGYAITVATAIFFLTLGAITMYGTGDGMLTGSGVSFAQKLILLYTKSIGEWSKWIIIPAAFAAMFSTTITCIDAYPRSISAIQGLLRGTDFGHMDSKAERNRFQIWMIAHIFASLIALLIARSGGVGVKDFVFAAMTGSFLTAPLFAWMAMDTINSKL…
	29279	GC_00000889		MIT9301	25672	ECG	167546.P9301_12961	)-transporter									P	P			COG1914	Mn2+ and Fe2+ transporters of the NRAMP family					PF01566	Natural resistance-associated macrophage protein									----MNLTK-GIQKSLGPGIVLAGAAIGGSHLLSSTTAGARFGFSLVGLILLTNLLKYPFLLVGTRFTASTGKSLLEGFKERNSLYLPLFLVVSLITGTFTIAAVSFVSGVLLTNIPLFSTFPAMDLSIGILIVSGMILILGKYKALDRISKFLVSLLTLLTLFAVLSLLFKGSINESLNMSFFEPEISPWKLTNLAFLIPLMGWMPCPVELCVWPSLWMFSRAKDSNYKPNINEAEFDFNLGYLITVVTAIFFLTLGAITMYGTGDGMLSGSGVSFAQKLILLYTKSIGNWAKWIIIPAAFAAMFSTTITCLDAYPRSISAIQGLLRGTDFGHLDSKAERNRFQIWMIVHIFASLIALLIARSGGIGVKDFVFAAMTGSFLTAPLFAWMAMDTINSKL…
	29277	GC_00000889		MIT9302	27644	ECG	167546.P9301_12961	)-transporter									P	P			COG1914	Mn2+ and Fe2+ transporters of the NRAMP family					PF01566	Natural resistance-associated macrophage protein									----MNLTK-GIQKSLGPGILLAGAAIGGSHLLSSTTAGARFGFSLVGLILLTNLLKYPFLLVGTRFTASTGKSLLEGFKERNSLYLPSFLIVSLITGTFTIAAVSFVSGVLLTNIPFFSAFPAMDLSIGILIVSGMILILGKYKALDRISKFLVSLLTFLTLFAVLSLLFKGSINESLNMSFFEPETSPWKLTNLAFLIPLMGWMPCPVELCVWPSLWMFSRAKDSNYKPNIGEAEFDFNLGYVITVVTAIFFLTLGAITMYGTGDGMLSGSGVSFAQKLILLYTKSIGSWAKWIIIPAAFAAMFSTTITCLDAYPRSISAIQGLLRGTDFGHMDSKSERNRFQLWMIVHIFASLIALLIARSGGIGVKDFVFAAMTGSFLTAPLFAWMAMDTINSKL…
	29285	GC_00000889		MIT9311	31873	ECG	74546.PMT9312_1219	)-transporter									P	P			COG1914	Mn2+ and Fe2+ transporters of the NRAMP family					PF01566	Natural resistance-associated macrophage protein									----MNFTK-GIQKSLGPGILLAGAAIGGSHLLSSTTAGARFGFSLVGLILLTNLLKYPFLLVGTRFTASTGKSLLEGFKEQNPLYLPLFLIVSLITGTFTISAVSFVSGVLLTNITFFSAFPAMDLSIGILIVSGMILILGKYKTLDRISKFLVSILTFLTLFAVLSLLFKGSINESLNMSFFEPEISPWKLTNLAFLIPLMGWMPCPVELCVWPSLWMFSRAKDSNYKPNISEAEFDFNLGYIITVVTAIFFLTLGAITMYGTGDGMLSGSGVSFAQKLILLYTKSIGNWAKWIIIPAAFAAMFSTTITCLDAYPRSISAIQGLLRGTDFGHMDSKAERNRFQLWMIIHIFASLIALLIARSGGIGVKDFVFAAMTGSFLTAPLFAWMAMDTINSKL…
	29274	GC_00000889		MIT9312	34142	ECG	74546.PMT9312_1219	)-transporter									P	P			COG1914	Mn2+ and Fe2+ transporters of the NRAMP family					PF01566	Natural resistance-associated macrophage protein									----MNFTK-GIQKSLGPGILLAGAAIGGSHLLSSTTAGARFGFSLVGLILLTNLLKYPFLLVGTRFTASTGKSLLEGFKEQNPLYLPLFLIVSLITGTFTISAVSFVSGVLLTNITFFSAFPAMDLSIGILIVSGMILILGKYKTLDRISKFLVSILTFLTLFAVLSLLFKGSINESLNMSFFEPEISPWKLTNLAFLIPLMGWMPCPVELCVWPSLWMFSRAKDSNYKPNISEAEFDFNLGYIITVVTAIFFLTLGAITMYGTGDGMLSGSGVSFAQKLILLYTKSIGNWAKWIIIPAAFAAMFSTTITCLDAYPRSISAIQGLLRGTDFGHMDSKAERNRFQLWMIIHIFASLIALLIARSGGIGVKDFVFAAMTGSFLTAPLFAWMAMDTINSKL…
	29272	GC_00000889		MIT9321	41089	ECG	74546.PMT9312_1219	)-transporter									P	P			COG1914	Mn2+ and Fe2+ transporters of the NRAMP family					PF01566	Natural resistance-associated macrophage protein									----MNLTK-GIQKSLGPGILLAGAAIGGSHLLSSTTAGARFGFSLVGLILLTNLLKYPFLLVGTRFTASTGKSLLEGFKERNSLYLPLFLIVSLITGTFTIAAVSFVSGVLLTNIPFFKAFPAMDLSIGILIVSGMILILGKYKALDRISKFLVSLLTFLTLFAVLSLLFKGSINESLNMSFFQPEISPWKLTNLAFLIPLMGWMPCPVELCVWPSLWMFSRAKDSNYKPNISEAEFDFNLGYLITVVTAIFFLTLGAITMYGTGDGMLSGSGVSFAQKLILLYTKSIGSWAKWIIIPAAFAAMFSTTITCLDAYPRSISAIQGLLRGTDFGHMDSKVERNRFQLWMIVHIFASLIALLIAKSGGIGVKDFVFAAMTGSFLTAPLFAWMAMDTINSKL…
	29265	GC_00000889		MIT9322	42301	ECG	74546.PMT9312_1219	)-transporter									P	P			COG1914	Mn2+ and Fe2+ transporters of the NRAMP family					PF01566	Natural resistance-associated macrophage protein									----MNLTK-GIQKSLGPGILLAGAAIGGSHLLSSTTAGARFGFSLVGLILLTNLLKYPFLLVGTRFTASTGKSLLEGFKERNSLYLPLFLIVSLITGTFTIAAVSFVSGVLLTNIPFFKAFPAMDLSIGILIVSGMILILGKYKALDRISKFLVSLLTFLTLFAVLSLLFKGSINESLNMSFFQPEISPWKLTNLAFLIPLMGWMPCPVELCVWPSLWMFSRAKDSNYKPNISEAEFDFNLGYLITVVTAIFFLTLGAITMYGTGDGMLSGSGVSFAQKLILLYTKSIGSWAKWIIIPAAFAAMFSTTITCLDAYPRSISAIQGLLRGTDFGHMDSKVERNRFQLWMIVHIFASLIALLIAKSGGIGVKDFVFAAMTGSFLTAPLFAWMAMDTINSKL…
	29281	GC_00000889		MIT9401	44123	ECG	74546.PMT9312_1219	)-transporter									P	P			COG1914	Mn2+ and Fe2+ transporters of the NRAMP family					PF01566	Natural resistance-associated macrophage protein									----MNLTK-GIQKSLGPGILLAGAAIGGSHLLSSTTAGARFGFSLVGLILLTNLLKYPFLLVGTRFTASTGKSLLEGFKERNSLYLPLFLIVSLITGTFTIAAVSFVSGVLLTNIPFFKAFPAMDLSIGILIVSGMILILGKYKALDRISKFLVSLLTFLTLFAVLSLLFKGSINESLNMSFFQPEISPWKLTNLAFLIPLMGWMPCPVELCVWPSLWMFSRAKDSNYKPNISEAEFDFNLGYLITVVTAIFFLTLGAITMYGTGDGMLSGSGVSFAQKLILLYTKSIGSWAKWIIIPAAFAAMFSTTITCLDAYPRSISAIQGLLRGTDFGHMDSKVERNRFQLWMIVHIFASLIALLIAKSGGIGVKDFVFAAMTGSFLTAPLFAWMAMDTINSKL…
	29266	GC_00000889		MIT9515	46134	ECG	167542.P9515_12521	)-transporter									P	P			COG1914	Mn2+ and Fe2+ transporters of the NRAMP family					PF01566	Natural resistance-associated macrophage protein									----MDLTKQGIQKSLGPGILLAGAAIGGSHLLSSTTAGARFGFGLVGLILITNLLKYPFLLVGTRFTSSTGKSLLEGFKEKNSLYLPIFVIVSLITGTFTIAAVSFVSGVLLTSIPLFSDFPAMDLSIGILIVCGLILLFGEYRALDRISKFLVALLTFLTLFAVISLLSKGSFNESLSVSWIEPKISPWKLSNLSFLIPLMGWMPCPVELCVWPSLWMFSRSKDSNYKPNVKESEFDFNLGYLITVVTAIFFVTLGAITMYGTGDEMLSGSGVFFAQKLIRLYTNSIGDWSKWIIIPASFAAMFSTTLTCLDAYPRSISSIQGLLKGTDKGHMESSSEKTRFRNWMVLHIFASLLALLIARSGGIGVKDFVFGAMTGSFLTAPIFAWMAMDTINSDL…
	29284	GC_00000889		NATL1A	47636	ECG	167555.NATL1_09041	)-transporter									P	P			COG1914	Mn2+ and Fe2+ transporters of the NRAMP family					PF01566	Natural resistance-associated macrophage protein	PS51257	Prokaryotic membrane lipoprotein lipid attachment site profile.							MDKLISSKSIGYRKSLGPGILLAAACIGGSHLMSSTTAGAKFGFSLIGLILLTNLVKYPFLLVGTRFTAVTGLSLLEGFQKRNKFYLPIYLIVGLITGTFTISAVSFVTGLLLKNIVIFSSFPPLDLAIGILIVCSLILFIGQYKALDRISKILVFLLTVLTFFAVISLLFKGPAGD-INISFLNSTPSPWTLSNLGFLIPLMGWMPGPVELCIWPSLWMFSRAKDTDHTATLKEAEFDFNLGYFITVLTAIFFLILGAYTMYGTGDEMLTGSGVSFAQNLIRLYTESIGGWAKWIIVPAAFAAMFSTTLTCLDAYPRSISSAHGLIARSDKGNSSTLSEKKRLKKWIIFHVFASLCALLIAKSGGIGVKDYVFGAMTGSFLTAPLFAWMAMDTMNSSL…
	29264	GC_00000889		NATL2A	49620	ECG	167555.NATL1_09041	)-transporter									P	P			COG1914	Mn2+ and Fe2+ transporters of the NRAMP family					PF01566	Natural resistance-associated macrophage protein	PS51257	Prokaryotic membrane lipoprotein lipid attachment site profile.							MDKLISSKSIGYRKSLGPGILLAAACIGGSHLMSSTTAGAKFGFSLIALILLTNLVKYPFLLVGTRFTAVTGLSLLEGFQKRNKFYLPIYLIVGLITGTFTISAVSFVTGLLLKNIVIFSSFPPLDLAIGILIVCSLILFIGQYKALDRISKILVFLLTVLTFFAVISLLFKGPAGD-INISFLNSTPSPWTLSNLGFLIPLMGWMPGPVELCIWPSLWMFSRAKDTDHTATLKEAEFDFNLGYFITVLTAIFFLILGAYTMYGTGDEMLTGSGVSFAQNLIRLYTESIGGWAKWIIVPAAFAAMFSTTLTCLDAYPRSISSAHGLIARSDKGNSSTLSEKKRLKKWIIFHVFASLCALLIAKSGGIGVKDYVFGAMTGSFLTAPLFAWMAMDTMNSSL…
	29263	GC_00000889		PAC1	52616	ECG	167555.NATL1_09041	)-transporter									P	P			COG1914	Mn2+ and Fe2+ transporters of the NRAMP family					PF01566	Natural resistance-associated macrophage protein	PS51257	Prokaryotic membrane lipoprotein lipid attachment site profile.							MEKLISSKSIGYRKSLGPGILLAAACIGGSHLMSSTTAGAKFGFSLIGLILLTNLVKYPFLLVGTRFTAVTGLSLLEGFQKRNKFYLPIYLIVGLITGTFTISAVSFVTGLLLKNIVIFSSFPPLDLAIGILIVCSLILFIGQYKALDRISKILVFLLTVLTFFAVISLLFKGPAGD-INISFLNSTPSPWTLSNLGFLIPLMGWMPGPVELCIWPSLWMFSRAKETNHTATLKEAEFDFNLGYFITVLTAIFFLILGAYTMYGTGDEMLTGSGVSFAQNLIRLYTESIGGWAKWIIVPAAFAAMFSTTLTCLDAYPRSISSAHGLIARSDKGNSSTLSEKKRLKQWIIFHVFASLCALLIAKSGGIGVKDYVFGAMTGSFLTAPLFAWMAMDTMNSSL…
	29262	GC_00000889		SS2	56234	NA	167539.Pro1203	)-transporter									P	P			COG1914	Mn2+ and Fe2+ transporters of the NRAMP family					PF01566	Natural resistance-associated macrophage protein	PS51257	Prokaryotic membrane lipoprotein lipid attachment site profile.							----MKLSRQGIQKSLGPGIVLAGACIGGSHLMSSTTAGAKFGFALVGLILLTNLLKYPFLLVGTRFTAVTGLSLLEGFKARNSIYLPLYLVIGLITGTFTIAAVSFVTGLLLTNIPFLSTIPPMDLSIGVLVASGIILLLGHYKALDKISKILVLMLTLLTSFAVISLLQRGSLGN-IDINFIDSNPSPWTLSNLSFLIPLMGWMPGPVELCVWPSLWMFSRSRDTKYTANLQEAEFDFNLGYLITVITSLLFVSLGAFTMYGSGEVMLSESGVSFAQNLIRLYTSSMGDWAKWVIIPASFAAMFSTTLTCLDAYPRSISAVQGLLQGKDRGITSSLSERKRLQFWIVIHIFTSLTALLIAKSGGISVKDFVFGAMTGSFLTAPIFAWMAMDTLNSSL…
	29283	GC_00000889		SS35	57353	NA	167539.Pro1203	)-transporter									P	P			COG1914	Mn2+ and Fe2+ transporters of the NRAMP family					PF01566	Natural resistance-associated macrophage protein	PS51257	Prokaryotic membrane lipoprotein lipid attachment site profile.							----MKLSRQGIQKSLGPGIVLAGACIGGSHLMSSTTAGAKFGFALVGLILLTNLLKYPFLLVGTRFTAVTGLSLLEGFKARNSIYLPLYLVIGLITGTFTIAAVSFVTGLLLTNIPFLSTIPPMDLSIGVLVASGIILLLGHYKALDKISKILVLMLTLLTSFAVISLLQRGSLGN-IDINFIDSNPSPWTLSNLSFLIPLMGWMPGPVELCVWPSLWMFSRSRDTKYTANLQEAEFDFNLGYLITVITSLLFVSLGAFTMYGSGEVMLSESGVSFAQNLIRLYTSSMGDWAKWVIIPASFAAMFSTTLTCLDAYPRSISAVQGLLQGKDRGITSSLSERKRLQFWIVIHIFTSLTALLIAKSGGISVKDFVFGAMTGSFLTAPIFAWMAMDTLNSSL…
	29276	GC_00000889		SS51	59851	NA	167539.Pro1203	)-transporter									P	P			COG1914	Mn2+ and Fe2+ transporters of the NRAMP family					PF01566	Natural resistance-associated macrophage protein	PS51257	Prokaryotic membrane lipoprotein lipid attachment site profile.							----MKLSRQGIQKSLGPGIVLAGACIGGSHLMSSTTAGAKFGFALVGLILLTNLLKYPFLLVGTRFTAVTGLSLLEGFKARNSIYLPLYLVIGLITGTFTIAAVSFVTGLLLTNIPFLSTIPPMDLSIGVLVASGIILLLGHYKALDKISKILVLMLTLLTSFAVISLLQRGSLGN-IDINFIDSNPSPWTLSNLSFLIPLMGWMPGPVELCVWPSLWMFSRSRDTKYTANLQEAEFDFNLGYLITVITSLLFVSLGAFTMYGSGEVMLSESGVSFAQNLIRLYTSSMGDWAKWVIIPASFAAMFSTTLTCLDAYPRSISAVQGLLQGKDRGITSSLSERKRLQFWIVIHIFTSLTALLIAKSGGISVKDFVFGAMTGSFLTAPIFAWMAMDTLNSSL…
	24106	GC_00005805	Singletons	MIT9303	29987	ECG	221360.RS9917_01936	)-transporter	G3DSA:1.20.1250.20	G3DSA:1.20.1250.20	PR00171	Sugar transporter signature	TIGR00879	SP: MFS transporter, sugar porter (SP) family			G	G			COG2814	Predicted arabinose efflux permease, MFS family					PF00083	Sugar (and other) transporter	PS50850	Major facilitator superfamily (MFS) profile.			SSF103473	SSF103473	PS00216	Sugar transport proteins signature 1.	MQLANKQLLDPSNQLSDQRNKRRRLRFILQIAISAALGGFLFGYDTAVINGAVGAIGTAFTVSKETLGFAVASALLGSALGAFTAGWLSDRIGRRNSMLVAALMFLVGSLGSALAPTITTLILWRVVGGLAVGFASVLAPAYIAEISPASMRGQLGSLQQLAIVIGIFLALLFDYVIVLLTADQNPVSLIGPLAAWRWMFMSEIIPAALYAVLVIGIPESPRYLVQKGLTQRAKAVIEKTLHEPADQVIARIQSSLVNTHQGKLSELFDRHTILLPIIWTGVMLAIFQQFVGINVIFYYSSVLWQAVGFSAKDSLIVTVITSITNVVTTFIAIAFIDRLGRKPLLLAGSVVMAVNLGVMSWAFAGAPLVNGAPHLAGAGAIVALIAANLFVFAFGFSWG…
	11412	GC_00000635	HL+LL Core	AS9601	1431	EAG	146891.A9601_14771	1-(5-phosphoribosyl)-5-amino-4-imidazole-carboxylate (air) carboxylase	G3DSA:3.40.50.7700	G3DSA:3.40.50.7700							F	F			COG1691	NCAIR mutase (PurE)-related protein			SM01001	AIR carboxylase	PF00731	AIR carboxylase					SSF52255	SSF52255			-MNFDIKFDFQRRDRLGLIEAIWGQDKSIDQLERLCGNVLSKNEVVFITRINSEKANYLLDLYDDARFYEKANCLTIGKNFNKIITNKKVAIISGGSSDLAITLEAQLALEIYGVNCQSFIDVGVAGLHRLMSQLEEINKYDVLIVCAGMEGALATVVGGLLAQPIIAVPVSVGYGVSKDGETALNSMLSSCSPGIAVMNIDNGYGAAMAALRIIKSIS--------
	11432	GC_00000635	HL+LL Core	CCMP1375	3171	NA	167539.Pro1352	1-(5-phosphoribosyl)-5-amino-4-imidazole-carboxylate (air) carboxylase	G3DSA:3.40.50.7700	G3DSA:3.40.50.7700							F	F			COG1691	NCAIR mutase (PurE)-related protein			SM01001	AIR carboxylase	PF00731	AIR carboxylase					SSF52255	SSF52255			MIEKEFKLDHERLKRLGMVEAIWGQHKSYEQICEILRRFQATSQMALVTRVDNKKAEKILDTLESVQYHSQASCLTLGSPLDLDPSLGEVLVVSGGTSDVGVAAEAELSLRMHGIQTDCLMDIGVAGLHRLLGKLERFTKARVVIVCAGMEGSLPTVIAGLIPQPVIGLPVSVGYGVSGGGNASLLSMLSSCSPGLLVVNIDNGYGAAMAALRIIKSDLFKKY----
	11426	GC_00000635	HL+LL Core	EQPAC1	4404	ECG	59919.PMM1278	1-(5-phosphoribosyl)-5-amino-4-imidazole-carboxylate (air) carboxylase	G3DSA:3.40.50.7700	G3DSA:3.40.50.7700							F	F			COG1691	NCAIR mutase (PurE)-related protein			SM01001	AIR carboxylase	PF00731	AIR carboxylase					SSF52255	SSF52255			-MNLDIRFDFQRRGRIGLIEAIWGADKSIDQLERVSKEVLEKKEVVFITRIDKEKAAHLLEIFKEGRFIEEANCFIIGENLNKFSTNKKVAIISGGSSDLAVTLEAKLSLEIYGVSCQTFIDVGVAGLHRLFSEIEEINKYDVLIVCAGMEGALATVIGGLLSQPIIAVPVSIGYGVSKNGETALNSMLSSCAPGISVMNIDNGYGAAMAALRIIKRIC--------
	11413	GC_00000635	HL+LL Core	GP2	6949	ECG	167546.P9301_14631	1-(5-phosphoribosyl)-5-amino-4-imidazole-carboxylate (air) carboxylase	G3DSA:3.40.50.7700	G3DSA:3.40.50.7700							F	F			COG1691	NCAIR mutase (PurE)-related protein			SM01001	AIR carboxylase	PF00731	AIR carboxylase					SSF52255	SSF52255			-MNFDIRFDFQRRDRLGLIEAIWGQDKSIDQLKRVSETVLNKNEVVFITRINSEKANYLLDLFDDARFYEEAKCLIIGENLNKINTNKKVAIISGGSSDLAVTLEAKLTLEIYGVNCQSFIDVGVAGLHRLMSQLEEINKYDVLIVCAGMEGALATVVGGLLAQPIIAVPVSVGYGASKDGETALNSMLSSCSPGIAVMNIDNGYGGAMAAIRIIKSIS--------
	11420	GC_00000635	HL+LL Core	LG	7524	NA	167539.Pro1352	1-(5-phosphoribosyl)-5-amino-4-imidazole-carboxylate (air) carboxylase	G3DSA:3.40.50.7700	G3DSA:3.40.50.7700							F	F			COG1691	NCAIR mutase (PurE)-related protein			SM01001	AIR carboxylase	PF00731	AIR carboxylase					SSF52255	SSF52255			MIEKEFKLDHERLKRLGMVEAIWGQHKSYEQICEILRRFQATSQMALVTRVDNKKAEKILDTLESVQYHSQASCLTLGSPLDLDPSLGEVLVVSGGTSDVGVAAEAELSLRMHGIQTDCLMDIGVAGLHRLLGKLERFTKARVVIVCAGMEGSLPTVIAGLIPQPVIGLPVSVGYGVSGGGNASLLSMLSSCSPGLLVVNIDNGYGAAMAALRIIKSDLFKKY----
	11418	GC_00000635	HL+LL Core	MED4	10664	ECG	59919.PMM1278	1-(5-phosphoribosyl)-5-amino-4-imidazole-carboxylate (air) carboxylase	G3DSA:3.40.50.7700	G3DSA:3.40.50.7700							F	F			COG1691	NCAIR mutase (PurE)-related protein			SM01001	AIR carboxylase	PF00731	AIR carboxylase					SSF52255	SSF52255			-MNLDIRFDFQRRGRIGLIEAIWGADKSIDQLERVSKEVLEKKEVVFITRIDKEKAAHLLEIFKEGRFIEEANCFIIGENLNKFSTNKKVAIISGGSSDLAVTLEAKLSLEIYGVSCQTFIDVGVAGLHRLFSEIEEINKYDVLIVCAGMEGALATVIGGLLSQPIIAVPVSIGYGVSKNGETALNSMLSSCAPGISVMNIDNGYGAAMAALRIIKRIC--------
	11411	GC_00000635	HL+LL Core	MIT9107	11548	ECG	74546.PMT9312_1372	1-(5-phosphoribosyl)-5-amino-4-imidazole-carboxylate (air) carboxylase	G3DSA:3.40.50.7700	G3DSA:3.40.50.7700							F	F			COG1691	NCAIR mutase (PurE)-related protein			SM01001	AIR carboxylase	PF00731	AIR carboxylase					SSF52255	SSF52255			-MNFDINFDFQRRERLGLIEAIWGQDKSLDQLKRLSESVLSKNEVVFITRINREKACYLLDLYDDARFCEEANCLIIGKNLKKINTNKKVAIISGGSSDLAVTLEAQLALEIYGVNFQSFIDVGVAGLHRLISQLEEINKYDVLIVCAGMEGALATVVGGLLAQPIIAVPVSVGYGISKDGETALNSMLSSCSPGIAVMNIDNGYGAAMAALRIIKSIS--------
	11410	GC_00000635	HL+LL Core	MIT9116	13352	ECG	74546.PMT9312_1372	1-(5-phosphoribosyl)-5-amino-4-imidazole-carboxylate (air) carboxylase	G3DSA:3.40.50.7700	G3DSA:3.40.50.7700							F	F			COG1691	NCAIR mutase (PurE)-related protein			SM01001	AIR carboxylase	PF00731	AIR carboxylase					SSF52255	SSF52255			-MNFDINFDFQRRERLGLIEAIWGQDKSLDQLKRLSESVLSKNEVVFITRINREKACYLLDLYDDARFCEEANCLIIGKNLKKINTNKKVAIISGGSSDLAVTLEAQLALEIYGVNFQSFIDVGVAGLHRLISQLEEINKYDVLIVCAGMEGALATVVGGLLAQPIIAVPVSVGYGISKDGETALNSMLSSCSPGIAVMNIDNGYGAAMAALRIIKSIS--------
	11414	GC_00000635	HL+LL Core	MIT9123	15317	ECG	74546.PMT9312_1372	1-(5-phosphoribosyl)-5-amino-4-imidazole-carboxylate (air) carboxylase	G3DSA:3.40.50.7700	G3DSA:3.40.50.7700							F	F			COG1691	NCAIR mutase (PurE)-related protein			SM01001	AIR carboxylase	PF00731	AIR carboxylase					SSF52255	SSF52255			-MNFDINFDFQRRERLGLIEAIWGQDKSLDQLKRLSESVLSKNEVVFITRINREKACYLLDLYDDARFCEEANCLIIGKNLKKINTNKKVAIISGGSSDLAVTLEAQLALEIYGVNFQSFIDVGVAGLHRLISQLEEINKYDVLIVCAGMEGALATVVGGLLAQPIIAVPVSVGYGISKDGETALNSMLSSCSPGIAVMNIDNGYGAAMAALRIIKSIS--------
	11416	GC_00000635	HL+LL Core	MIT9201	17390	ECG	167546.P9301_14631	1-(5-phosphoribosyl)-5-amino-4-imidazole-carboxylate (air) carboxylase	G3DSA:3.40.50.7700	G3DSA:3.40.50.7700							F	F			COG1691	NCAIR mutase (PurE)-related protein			SM01001	AIR carboxylase	PF00731	AIR carboxylase					SSF52255	SSF52255			-MNFDIKFDFQRRERLGLIEAIWGQDKSIDQLKRLSESVLSKNEVVFITRINSEKANYLLDLYDDAQFYEEANCLIIGKNLNKINTNKKVAIISGGSSDLGVTLEAQLALKIYGVNSQSFIDVGVAGLHRLMSQLEEINKYNVLIVCAGMEGALATVVGGLLAQPIIAVPVSVGYGVSKDGETALNSMLSSCSPGIAVMNIDNGYGAAMAALRIIKSIS--------
	11423	GC_00000635	HL+LL Core	MIT9202	19155	ECG	146891.A9601_14771	1-(5-phosphoribosyl)-5-amino-4-imidazole-carboxylate (air) carboxylase	G3DSA:3.40.50.7700	G3DSA:3.40.50.7700							F	F			COG1691	NCAIR mutase (PurE)-related protein			SM01001	AIR carboxylase	PF00731	AIR carboxylase					SSF52255	SSF52255			-MNFDIKFDFQRRERLGLIEAIWGQDKSIDQLKRLSKSVLNKNEVVFITRINSEKASYLLDLYDDARFYEGANCLIIGENLNKINTNKKVAIISGGTSDLAVTLEVQIALEIYGVNFQSFIDVGVAGLHRLMSQLEEINKYDVLIVCAGMEGALATVVGGLLAQPIIAVPVSVGYGVSKNGETALNSMLSSCSPGIAVMNIDNGYGAAMAALRIIKSIS--------
	11428	GC_00000635	HL+LL Core	MIT9211	21979	NA	93059.P9211_13241	1-(5-phosphoribosyl)-5-amino-4-imidazole-carboxylate (air) carboxylase	G3DSA:3.40.50.7700	G3DSA:3.40.50.7700							F	F			COG1691	NCAIR mutase (PurE)-related protein			SM01001	AIR carboxylase	PF00731	AIR carboxylase					SSF52255	SSF52255			MISKEARLDLDRLSRLGMVEAIWGEHKTFEQIAEILKSFSEAGQLAFVTRVSVDKAEKLMQIFEQAEYHSKAKCLTLGRPFEVHPTEGKVVILSGGTSDLAVASEAELSLRLHGIKTEILLDIGVAGLHRLLNNLDKLTSAEVVIACAGMEGALPTVLGGLIPQPVIGVPVSVGYGVSAGGITALKGMLASCSPGLTVVNIDNGYGAAMAALRIIRSRSNK------
	11425	GC_00000635	HL+LL Core	MIT9215	23948	ECG	93060.P9215_15031	1-(5-phosphoribosyl)-5-amino-4-imidazole-carboxylate (air) carboxylase	G3DSA:3.40.50.7700	G3DSA:3.40.50.7700							F	F			COG1691	NCAIR mutase (PurE)-related protein			SM01001	AIR carboxylase	PF00731	AIR carboxylase					SSF52255	SSF52255			-MNFDIKFDFQRRDRLGLIEAIWGQDKSIDQLERLCRNVLSKNEVVFITRINSEKANYLLNLYDDARFHEEANCLTIGKNFNKIITNKKVAIISGGSSDLAVTLEAQLALEIYGVNCQSFIDVGVAGLHRLMSQLEEINKYDVLIVFAGMEGALATVVGGLLAQPIIAVPVSVGYGVSKDGETALNSMLSSCSPGIAVMNIDNGYGAAMAALRIIKSIS--------
	11424	GC_00000635	HL+LL Core	MIT9301	25837	ECG	167546.P9301_14631	1-(5-phosphoribosyl)-5-amino-4-imidazole-carboxylate (air) carboxylase	G3DSA:3.40.50.7700	G3DSA:3.40.50.7700							F	F			COG1691	NCAIR mutase (PurE)-related protein			SM01001	AIR carboxylase	PF00731	AIR carboxylase					SSF52255	SSF52255			-MNFDIKFDFQRRDRLGLIEAIWGQDKSIDQLERLCGNVLSKNEVVFITRINSEKANYLLDLYDDARFHEEANCLLIGKNFNKIITNKKVAIISGGSSDLAVTLEAQLALEIYGVNCQSFIDVGVAGLHRLMSQLEEINKYDVLIVCAGMEGALATVVGGLLAQPIIAVPVSVGYGVSKDGETALNSMLSSCSPGIAVMNIDNGYGAAMAALRIIKSIS--------
	11422	GC_00000635	HL+LL Core	MIT9302	27815	ECG	74546.PMT9312_1372	1-(5-phosphoribosyl)-5-amino-4-imidazole-carboxylate (air) carboxylase	G3DSA:3.40.50.7700	G3DSA:3.40.50.7700							F	F			COG1691	NCAIR mutase (PurE)-related protein			SM01001	AIR carboxylase	PF00731	AIR carboxylase					SSF52255	SSF52255			-MNFDIRFDFQRRERLGLIEAIWGQDKSIDQLKRLSENVLGKNEVVFITRINSEKANYLLDLYDYGRFYEEAKCLIIGDNLNKLNTNKKVAIISGGSSDLAVTLEAQLALEIYGVNCQSFIDVGVAGLHRLISQLEEINKYDVLIVCAGMEGALATVVGGLLAQPIIAVPVSVGYGVSKNGETALNSMLSSCSPGIAVMNIDNGYGAAMAALRIIKSIS--------
	11403	GC_00000635	HL+LL Core	MIT9303	29979	ECG	74547.PMT0358	1-(5-phosphoribosyl)-5-amino-4-imidazole-carboxylate (air) carboxylase	G3DSA:3.40.50.7700	G3DSA:3.40.50.7700							F	F			COG1691	NCAIR mutase (PurE)-related protein			SM01001	AIR carboxylase	PF00731	AIR carboxylase					SSF52255	SSF52255			MTEPQVRLDLQRRQRLGMVEAIFGEHKTSEQIAACLSRLEAAGELALVTRVDQAKAAAVADLLSNVQFHAQARCLTLGDPAILLPALGEVVVLSGGTSDLPIAAEAALALRWHGIQSELLLDVGVAGLQRLLDQLARLQRAKVLIACAGMEGSLPTVLTGLVPQPVIGVPVSVGYGVSAGGRTALEGMLASCAPGLVVVNIDNGYGAAMAALRILKAAITGEAAVNQ
	11431	GC_00000635	HL+LL Core	MIT9311	32008	ECG	74546.PMT9312_1372	1-(5-phosphoribosyl)-5-amino-4-imidazole-carboxylate (air) carboxylase	G3DSA:3.40.50.7700	G3DSA:3.40.50.7700							F	F			COG1691	NCAIR mutase (PurE)-related protein			SM01001	AIR carboxylase	PF00731	AIR carboxylase					SSF52255	SSF52255			-MNLDIRFDFQRRERLGLIEAIWGQDKSIDQLKRLSENVLSKNEVVFITRINSEKAIDLLDFYDDARFYEEAKCLIIGKNLNKLNTNKKVAIISGGSSDLPVTLEAQLALEIYGVNCQSFIDVGVAGLHRLISQLEEINKYDVLIVCAGMEGALATVVGGLLAQPIIAVPVSVGYGVSKNGETALNSMLSSCSPGVAVMNIDNGYGAAMAALRIIKSIS--------
	11417	GC_00000635	HL+LL Core	MIT9312	34304	ECG	74546.PMT9312_1372	1-(5-phosphoribosyl)-5-amino-4-imidazole-carboxylate (air) carboxylase	G3DSA:3.40.50.7700	G3DSA:3.40.50.7700							F	F			COG1691	NCAIR mutase (PurE)-related protein			SM01001	AIR carboxylase	PF00731	AIR carboxylase					SSF52255	SSF52255			-MNLDIRFDFQRRERLGLIEAIWGQDKSIDQLKRLSENVLSKNEVVFITRINSEKAIDLLDFYDDARFYEEAKCLIIGKNLNKLNTNKKVAIISGGSSDLPVTLEAQLALEIYGVNCQSFIDVGVAGLHRLISQLEEINKYDVLIVCAGMEGALATVVGGLLAQPIIAVPVSVGYGVSKNGETALNSMLSSCSPGVAVMNIDNGYGAAMAALRIIKSIS--------
	11409	GC_00000635	HL+LL Core	MIT9313	35167	ECG	74547.PMT0358	1-(5-phosphoribosyl)-5-amino-4-imidazole-carboxylate (air) carboxylase	G3DSA:3.40.50.7700	G3DSA:3.40.50.7700							F	F			COG1691	NCAIR mutase (PurE)-related protein			SM01001	AIR carboxylase	PF00731	AIR carboxylase					SSF52255	SSF52255			MTEPQVRLDLQRRQRLGMVEAIFGEHKTSEQIAACLSRLEAAGELALVTRVDQAKAAAVADLLSNVQFHAQARCLTLGDPAILLPALGEVVVLSGGSSDLPIAAEAALALRWHGIQSELLLDVGVAGLQRLLDQLVRLQRAKVLIACAGMEGSLPTVLTGLVPQPVIGVPVSVGYGVSAGGRTALEGMLASCAPGLVVVNIDNGYGAAMAALRILKAAITGEVAVNQ
	11408	GC_00000635	HL+LL Core	MIT9314	39009	ECG	167546.P9301_14631	1-(5-phosphoribosyl)-5-amino-4-imidazole-carboxylate (air) carboxylase	G3DSA:3.40.50.7700	G3DSA:3.40.50.7700							F	F			COG1691	NCAIR mutase (PurE)-related protein			SM01001	AIR carboxylase	PF00731	AIR carboxylase					SSF52255	SSF52255			-MNFDIKFDFQRRDRLGLIEAIWGQDKSIDQLERLCVNVLSKNEVVFITRINSEKANYLLDLYDDARFHEEANCLTIGKNLKKIITNKKVAIISGGSSDLAVTLEAQLALEIYGVNCQSFIDVGVAGLHRLMSQLEEINKYDVLIVCAGMEGALATVVGGLLAQPIIAVPVSVGYGVSKDGATALNSMLSSCSPGIAVMNIDNGYGAAMAALRIIKSIS--------
	11415	GC_00000635	HL+LL Core	MIT9321	40915	ECG	146891.A9601_14771	1-(5-phosphoribosyl)-5-amino-4-imidazole-carboxylate (air) carboxylase	G3DSA:3.40.50.7700	G3DSA:3.40.50.7700							F	F			COG1691	NCAIR mutase (PurE)-related protein			SM01001	AIR carboxylase	PF00731	AIR carboxylase					SSF52255	SSF52255			-MNFDIKFDFQRRDRLGLIEAIWGQDKSIDQLERLSENVLSKNEVVFITRINSEKANYLLDLYDDARFYEEANCLTIGKNLNKICTNKKVAIISGGSSDLAVTLEAQLALEIYGVNCQSFIDVGVAGLHRLMSQLEEINKYDVLIVCAGMEGALATVVGGLLAQPIIAVPVSVGYGVSKDGETALNSMLSSCSPGIAVMNIDNGYGAAMAALRIIKSIS--------
	11406	GC_00000635	HL+LL Core	MIT9322	42137	ECG	146891.A9601_14771	1-(5-phosphoribosyl)-5-amino-4-imidazole-carboxylate (air) carboxylase	G3DSA:3.40.50.7700	G3DSA:3.40.50.7700							F	F			COG1691	NCAIR mutase (PurE)-related protein			SM01001	AIR carboxylase	PF00731	AIR carboxylase					SSF52255	SSF52255			-MNFDIKFDFQRRDRLGLIEAIWGQDKSIDQLERLSENVLSKNEVVFITRINSEKANYLLDLYDDARFYEEANCLTIGKNLNKICTNKKVAIISGGSSDLAVTLEAQLALEIYGVNCQSFIDVGVAGLHRLMSQLEEINKYDVLIVCAGMEGALATVVGGLLAQPIIAVPVSVGYGVSKDGETALNSMLSSCSPGIAVMNIDNGYGAAMAALRIIKSIS--------
	11427	GC_00000635	HL+LL Core	MIT9401	43702	ECG	146891.A9601_14771	1-(5-phosphoribosyl)-5-amino-4-imidazole-carboxylate (air) carboxylase	G3DSA:3.40.50.7700	G3DSA:3.40.50.7700							F	F			COG1691	NCAIR mutase (PurE)-related protein			SM01001	AIR carboxylase	PF00731	AIR carboxylase					SSF52255	SSF52255			-MNFDIKFDFQRRDRLGLIEAIWGQDKSIDQLERLSENVLSKNEVVFITRINSEKANYLLDLYDDARFYEEANCLTIGKNLNKICTNKKVAIISGGSSDLAVTLEAQLALEIYGVNCQSFIDVGVAGLHRLMSQLEEINKYDVLIVCAGMEGALATVVGGLLAQPIIAVPVSVGYGVSKDGETALNSMLSSCSPGIAVMNIDNGYGAAMAALRIIKSIS--------
	11407	GC_00000635	HL+LL Core	MIT9515	46314	ECG	167542.P9515_14391	1-(5-phosphoribosyl)-5-amino-4-imidazole-carboxylate (air) carboxylase	G3DSA:3.40.50.7700	G3DSA:3.40.50.7700							F	F			COG1691	NCAIR mutase (PurE)-related protein			SM01001	AIR carboxylase	PF00731	AIR carboxylase					SSF52255	SSF52255			-MNLDIRFDFQRRERIGLIEAIWGADKSVDQLKRVSKEVLQKKEVVLITRIDKEKAIHLLDEFEEAIFYEEANCLIVGENFNKISTNKKVAIIAGGSSDLAVTLEAKLSLELYGVRCQSFIDVGVAGLHRLLNQIDEINKYDVLIVCAGMEGALATVIGGLLPQPIIAVPVSIGYGVSKNGETALNSMLSSCAPGISVMNIDNGYGAAMAALRIIKRI---------
	11430	GC_00000635	HL+LL Core	NATL1A	48328	ECG	167555.NATL1_16981	1-(5-phosphoribosyl)-5-amino-4-imidazole-carboxylate (air) carboxylase	G3DSA:3.40.50.7700	G3DSA:3.40.50.7700							F	F			COG1691	NCAIR mutase (PurE)-related protein			SM01001	AIR carboxylase	PF00731	AIR carboxylase					SSF52255	SSF52255			-MNESI-IDFQRRTRIGVVEAIWGEHKTIEQISEILKKYQLECETALVTRLTKEKGQKLLVEFPSAEFQEISGCLTLGEFKECTSSKEEVIILTGGTSDVGVASEAEIALNFHGIKTKLLIDVGVAGLHRLLERLEEIKLAKVVIACAGMEGALPTVLAGLIPQPIIGLPISVGYGISGGGKTALEGMLASCAPGLVVVNIDNGYGAAMAAMRILST----------
	11405	GC_00000635	HL+LL Core	NATL2A	50301	ECG	167555.NATL1_16981	1-(5-phosphoribosyl)-5-amino-4-imidazole-carboxylate (air) carboxylase	G3DSA:3.40.50.7700	G3DSA:3.40.50.7700							F	F			COG1691	NCAIR mutase (PurE)-related protein			SM01001	AIR carboxylase	PF00731	AIR carboxylase					SSF52255	SSF52255			-MNESI-IDFQRRTRIGVVEAIWGEHKTIEQISEILKKYQLECETALVTRLTKEKGQKLLVEFPSAEFHEISGCLTLGEFKECTSSKEEVIILTGGTSDVGVASEAEIALNFHGIKTKLLIDVGVAGLHRLLDRIEEIKLSKVVIACAGMEGALPTVLAGLIPQPIIGLPISVGYGISGGGKTALEGMLASCAPGLVVVNIDNGYGAAMAAMRILST----------
	11404	GC_00000635	HL+LL Core	PAC1	51453	ECG	167555.NATL1_16981	1-(5-phosphoribosyl)-5-amino-4-imidazole-carboxylate (air) carboxylase	G3DSA:3.40.50.7700	G3DSA:3.40.50.7700					Coil	Coil	F	F			COG1691	NCAIR mutase (PurE)-related protein			SM01001	AIR carboxylase	PF00731	AIR carboxylase					SSF52255	SSF52255			-MNESI-IDFQRRTRLGVVEAIWGEHKTIEQISEILEKYQRECETALVTRLTKEKGQKLLVEFSSAEFHEISGCLTLGEFKECTSFEEEVIILTGGTSDVGVASEAEIALNLHGIKTKLLIDVGVAGLHRLLDRIEEIKLAKVVIACAGMEGALPTVLAGLIPQPIIGLPVSVGYGMSGGGKTALEGMLASCAPGLTVVNIDNGYGAAMAAIRILST----------
	11419	GC_00000635	HL+LL Core	SB	54484	ECG	146891.A9601_14771	1-(5-phosphoribosyl)-5-amino-4-imidazole-carboxylate (air) carboxylase	G3DSA:3.40.50.7700	G3DSA:3.40.50.7700							F	F			COG1691	NCAIR mutase (PurE)-related protein			SM01001	AIR carboxylase	PF00731	AIR carboxylase					SSF52255	SSF52255			-MNFDIKFDFQRRDRIGLIEAIWGQDKSIDQLERLSENVLSKNEVVFITRINSEKANYLLDLYDDARFYKEANCLTIGENFNKIITNKKVAIISGGSSDLAVTLEAQLALEIYGVNCQSFIDVGVAGLHRLMSQLEEINKYDVLIVCAGMEGALATVVGGLLAQPIIAVPVSVGYGVSKDGETALNSMLSSCSPGIAVMNIDNGYGAAMAALRIIKSIS--------
	11402	GC_00000635	HL+LL Core	SS2	55002	NA	167539.Pro1352	1-(5-phosphoribosyl)-5-amino-4-imidazole-carboxylate (air) carboxylase	G3DSA:3.40.50.7700	G3DSA:3.40.50.7700							F	F			COG1691	NCAIR mutase (PurE)-related protein			SM01001	AIR carboxylase	PF00731	AIR carboxylase					SSF52255	SSF52255			MIEKEFKLDHERLKRLGMVEAIWGQHKSYEQICEILRRFQATSQMALVTRVDNKKAEKILDTLESVQYHSQASCLTLGSPLDLDPSLGEVLVVSGGTSDVGVAAEAELSLRMHGIQTDCLMDIGVAGLHRLLGKLERFTKARVVIVCAGMEGSLPTVIAGLIPQPVIGLPVSVGYGVSGGGNASLLSMLSSCSPGLLVVNIDNGYGAAMAALRIIKSDLFKKY----
	11429	GC_00000635	HL+LL Core	SS35	56697	NA	167539.Pro1352	1-(5-phosphoribosyl)-5-amino-4-imidazole-carboxylate (air) carboxylase	G3DSA:3.40.50.7700	G3DSA:3.40.50.7700							F	F			COG1691	NCAIR mutase (PurE)-related protein			SM01001	AIR carboxylase	PF00731	AIR carboxylase					SSF52255	SSF52255			MIEKEFKLDHERLKRLGMVEAIWGQHKSYEQICEILRRFQATSQMALVTRVDNKKAEKILDTLESVQYHSQASCLTLGSPLDLDPSLGEVLVVSGGTSDVGVAAEAELSLRMHGIQTDCLMDIGVAGLHRLLGKLERFTKARVVIVCAGMEGSLPTVIAGLIPQPVIGLPVSVGYGVSGGGNASLLSMLSSCSPGLLVVNIDNGYGAAMAALRIIKSDLFKKY----
	11421	GC_00000635	HL+LL Core	SS51	58928	NA	167539.Pro1352	1-(5-phosphoribosyl)-5-amino-4-imidazole-carboxylate (air) carboxylase	G3DSA:3.40.50.7700	G3DSA:3.40.50.7700							F	F			COG1691	NCAIR mutase (PurE)-related protein			SM01001	AIR carboxylase	PF00731	AIR carboxylase					SSF52255	SSF52255			MIEKEFKLDHERLKRLGMVEAIWGQHKSYEQICEILRRFQATSQMALVTRVDNKKAEKILDTLESVQYHSQASCLTLGSPLDLDPSLGEVLVVSGGTSDVGVAAEAELSLRMHGIQTDCLMDIGVAGLHRLLGKLERFTKARVVIVCAGMEGSLPTVIAGLIPQPVIGLPVSVGYGVSGGGNASLLSMLSSCSPGLLVVNIDNGYGAAMAALRIIKSDLFKKY----
	45568	GC_00000882		AS9601	192	ECG	146891.A9601_01941	1,4-dihydroxy-2-naphthoate octaprenyltransferase					TIGR02235	menA_cyano-plnt: 1,4-dihydroxy-2-naphthoate phytyltransferase			H	H	PIRSF005355	PIRSF005355	COG1575	1,4-dihydroxy-2-naphthoate octaprenyltransferase	MF_01938	1,4-dihydroxy-2-naphthoate phytyltransferase [menA].			PF01040	UbiA prenyltransferase family									-------------------------MDEDKKKLWKKAIKWPLYSVAILPVLITGAYLLNQYEEVKIYNLISFTLAAILILLWENLTNDLYDAETGIDEF-KFHSIVNLVKNKKIISFIAYTSLVIGLLIILIISVSTSINIFILVAACCFLGYLYQGPPFRLGYQGLGEPLCWLAFGPFAYSAVLIALNPSNIYFEDIPWKVSLLLGSGPSLATTLVLFCSHFHQISEDRKHGKNSPLVRLGAKKGSQFVPWIIFTIYIFQLLTIVYGFIPVFCILYLLSFPQAIRLINLLKSSYAKPSAIKNCKFVAIKFQTLNGIGLITGLIFNYLLNK------
	45580	GC_00000882		EQPAC1	3924	ECG	59919.PMM0176	1,4-dihydroxy-2-naphthoate octaprenyltransferase					TIGR02235	menA_cyano-plnt: 1,4-dihydroxy-2-naphthoate phytyltransferase			H	H	PIRSF005355	PIRSF005355	COG1575	1,4-dihydroxy-2-naphthoate octaprenyltransferase	MF_01938	1,4-dihydroxy-2-naphthoate phytyltransferase [menA].			PF01040	UbiA prenyltransferase family									-------------------------MNERNKSLWKQAIKWPLYSVAILPVFISGAYTLNSFKNVKIYNLIAFTIAAILILIWENLTNDLFDSETGIDEF-KFHSIVNLVRSKTIVSITAYTSLLIGLVVIAIISISTSINVMLLVGACCFLGYLYQGPPFRLGYQGLGEPLCWLAFGPFAYAAALIALNPSDIYMISIPWKESLLLGSGSSLATTLVLFCSHFHQIKEDKEHGKNSPLVLLGAKKGAKIIPWIVFIIYVFQLFLIINGFIPILCVLFLISFPQSLKLINLLKYSYNKPEAIKNCKFIAIKFQTLNGIGLIAGFIINYLIYK------
	45569	GC_00000882		GP2	5917	ECG	93060.P9215_01941	1,4-dihydroxy-2-naphthoate octaprenyltransferase					TIGR02235	menA_cyano-plnt: 1,4-dihydroxy-2-naphthoate phytyltransferase			H	H	PIRSF005355	PIRSF005355	COG1575	1,4-dihydroxy-2-naphthoate octaprenyltransferase	MF_01938	1,4-dihydroxy-2-naphthoate phytyltransferase [menA].			PF01040	UbiA prenyltransferase family									-------------------------MDEDKKKLWKQAIKWPLYSVAILPVLITGAYILNQYEKVKIYNLIAFTLAAIFILLWENLTNDLFDAETGIDEF-KFHSIVNLIKNKKIISFIAYTSLVIGLLIISIISLSTSINILILVACCCFLGYLYQGPPFRFGYQGLGEPLCWLAFGPFAYSAVLIALNPSNIYFEVIPWKVSLLLGSGPSLATTLVLFCSHFHQISEDKKHGKNSPLVRLGAKKGSQFVPWIIFTIYIFQLLTIVTGFIPVFCILYLISSPQAIRLINLLKYSYNKPSAIKNSKFIAIKFQTLNGVGLITGLIFNYLVNK------
	45574	GC_00000882		MED4	9432	ECG	59919.PMM0176	1,4-dihydroxy-2-naphthoate octaprenyltransferase					TIGR02235	menA_cyano-plnt: 1,4-dihydroxy-2-naphthoate phytyltransferase			H	H	PIRSF005355	PIRSF005355	COG1575	1,4-dihydroxy-2-naphthoate octaprenyltransferase	MF_01938	1,4-dihydroxy-2-naphthoate phytyltransferase [menA].			PF01040	UbiA prenyltransferase family									-------------------------MNERNKSLWKQAIKWPLYSVAILPVFISGAYTLNSFKNVKIYNLIAFTIAAILILIWENLTNDLFDSETGIDEF-KFHSIVNLVRSKTIVSITAYTSLLIGLVVIAIISISTSINVMLLVGACCFLGYLYQGPPFRLGYQGLGEPLCWLAFGPFAYAAALIALNPSDIYMISIPWKESLLLGSGSSLATTLVLFCSHFHQIKEDKEHGKNSPLVLLGAKKGAKIIPWIVFIIYVFQLFLIINGFIPILCVLFLISFPQSLKLINLLKYSYNKPEAIKNCKFIAIKFQTLNGIGLIAGFIINYLIYK------
	45567	GC_00000882		MIT9107	12829	ECG	74546.PMT9312_0178	1,4-dihydroxy-2-naphthoate octaprenyltransferase					TIGR02235	menA_cyano-plnt: 1,4-dihydroxy-2-naphthoate phytyltransferase			H	H	PIRSF005355	PIRSF005355	COG1575	1,4-dihydroxy-2-naphthoate octaprenyltransferase	MF_01938	1,4-dihydroxy-2-naphthoate phytyltransferase [menA].			PF01040	UbiA prenyltransferase family									-------------------------MDENKKKLWKQAIKWPLYSVAILPVFITGAYLLNQYEKVKIYNLIAFTLAAILILLWENLTNDLFDAETGIDEF-KFHSIVNLVKNKKIISFIAYTSLVIGLLIISIISISTSINILILVTACCFLGYLYQGPPFRFGYQGLGEPLCWIAFGPFAYSAVLIALNPSNIYFEDIPWKVSLLLGSGPSLATTLVLFCSHFHQISEDKKHGKNSPLVRLGSKKGSQFVPWIIFTIYIFQLFTIVTGFIPVFCILYLISFPQAIRLINLVTSSYKKPSAIKNCKFVAIKFQTLNGVGLITGLIFNYLINK------
	45566	GC_00000882		MIT9116	14826	ECG	74546.PMT9312_0178	1,4-dihydroxy-2-naphthoate octaprenyltransferase					TIGR02235	menA_cyano-plnt: 1,4-dihydroxy-2-naphthoate phytyltransferase			H	H	PIRSF005355	PIRSF005355	COG1575	1,4-dihydroxy-2-naphthoate octaprenyltransferase	MF_01938	1,4-dihydroxy-2-naphthoate phytyltransferase [menA].			PF01040	UbiA prenyltransferase family									-------------------------MDENKKKLWKQAIKWPLYSVAILPVFITGAYLLNQYEKVKIYNLIAFTLAAILILLWENLTNDLFDAETGIDEF-KFHSIVNLVKNKKIISFIAYTSLVIGLLIISIISISTSINILILVTACCFLGYLYQGPPFRFGYQGLGEPLCWIAFGPFAYSAVLIALNPSNIYFEDIPWKVSLLLGSGPSLATTLVLFCSHFHQISEDKKHGKNSPLVRLGSKKGSQFVPWIIFTIYIFQLFTIVTGFIPVFCILYLISFPQAIRLINLVTSSYKKPSAIKNCKFVAIKFQTLNGVGLITGLIFNYLINK------
	45570	GC_00000882		MIT9123	15114	ECG	74546.PMT9312_0178	1,4-dihydroxy-2-naphthoate octaprenyltransferase					TIGR02235	menA_cyano-plnt: 1,4-dihydroxy-2-naphthoate phytyltransferase			H	H	PIRSF005355	PIRSF005355	COG1575	1,4-dihydroxy-2-naphthoate octaprenyltransferase	MF_01938	1,4-dihydroxy-2-naphthoate phytyltransferase [menA].			PF01040	UbiA prenyltransferase family									-------------------------MDENKKKLWKQAIKWPLYSVAILPVFITGAYLLNQYEKVKIYNLIAFTLAAILILLWENLTNDLFDAETGIDEF-KFHSIVNLVKNKKIISFIAYTSLVIGLLIISIISISTSINILILVTACCFLGYLYQGPPFRFGYQGLGEPLCWIAFGPFAYSAVLIALNPSNIYFEDIPWKVSLLLGSGPSLATTLVLFCSHFHQISEDKKHGKNSPLVRLGSKKGSQFVPWIIFTIYIFQLFTIVTGFIPVFCILYLISFPQAIRLINLVTSSYKKPSAIKNCKFVAIKFQTLNGVGLITGLIFNYLINK------
	45572	GC_00000882		MIT9201	18622	ECG	146891.A9601_01941	1,4-dihydroxy-2-naphthoate octaprenyltransferase					TIGR02235	menA_cyano-plnt: 1,4-dihydroxy-2-naphthoate phytyltransferase			H	H	PIRSF005355	PIRSF005355	COG1575	1,4-dihydroxy-2-naphthoate octaprenyltransferase	MF_01938	1,4-dihydroxy-2-naphthoate phytyltransferase [menA].			PF01040	UbiA prenyltransferase family									-------------------------MEVNKKKLWKQAIKWPLYSVAILPVLITGAYLLNQYEKIKINNLIAFTLAAILILLWENLTNDLFDAETGIDEF-KFHSIVNIVKNKKIISFIAYTSLIVGLLIIAIISVSTSINIFILVAACCFLGYLYQGPPFRFGYQGLGEPLCWLAFGPFAYSAVLIALNPSNIYFEDIPWKVSLLLGSGPSLATTLVLFCSHFHQISEDKKHGKNSPLVRLGAKKGSQFVPWIIFAIYIFQLFTIVTGFIPVFCIFYLISFPQAIRLINLLRSSYKKPSAIKNCKFIAIKFQTLNGVGLITGLIFNYLLNK------
	45577	GC_00000882		MIT9202	19823	ECG	93060.P9215_01941	1,4-dihydroxy-2-naphthoate octaprenyltransferase					TIGR02235	menA_cyano-plnt: 1,4-dihydroxy-2-naphthoate phytyltransferase			H	H	PIRSF005355	PIRSF005355	COG1575	1,4-dihydroxy-2-naphthoate octaprenyltransferase	MF_01938	1,4-dihydroxy-2-naphthoate phytyltransferase [menA].			PF01040	UbiA prenyltransferase family									----------------MIEFCELNKKNEDKKKLWQQAIKWPLYSVAILPVLITGAYILNQYEKLKIYNLIAFTLAAIFILLWENLTNDLFDAETGIDEF-KFHSIVNLVKNKKIISFIAYTSLFIGLLIISIISVSTSINILILVASCCFLGYLYQGPPFRFGYQGLGEPLCWLAFGPFAYSAILIALNPSNIYFEDIPWRVSLLLGSGPSLATTLVLFCSHFHQISEDKKHGKNSPLVLLGAKKGSEFVPWIIFTIYIFQLLTIFTGFIPVFCILYLISFPQAIRLINLLKYSYRKPSAIKNSKFVAIKFQTLNGVGLITGLIFNYLLNK------
	45582	GC_00000882		MIT9211	20921	NA	93059.P9211_01941	1,4-dihydroxy-2-naphthoate octaprenyltransferase					TIGR02235	menA_cyano-plnt: 1,4-dihydroxy-2-naphthoate phytyltransferase			H	H	PIRSF005355	PIRSF005355	COG1575	1,4-dihydroxy-2-naphthoate octaprenyltransferase	MF_01938	1,4-dihydroxy-2-naphthoate phytyltransferase [menA].			PF01040	UbiA prenyltransferase family									#NAME?
	45579	GC_00000882		MIT9215	22667	ECG	93060.P9215_01941	1,4-dihydroxy-2-naphthoate octaprenyltransferase					TIGR02235	menA_cyano-plnt: 1,4-dihydroxy-2-naphthoate phytyltransferase			H	H	PIRSF005355	PIRSF005355	COG1575	1,4-dihydroxy-2-naphthoate octaprenyltransferase	MF_01938	1,4-dihydroxy-2-naphthoate phytyltransferase [menA].			PF01040	UbiA prenyltransferase family									-------------------------MNEDKKKLWQQAIKWPLYSVAILPVLITGAYILNQYEKVKIYNLIAFTLAAIFILLWENLTNDLFDAETGIDEF-KFHSIVNLVKNKKIISFIAYTSLFIGLLIISIISVSLSINILILVASCCFLGYLYQGPPFRFGYQGLGEPLCWLAFGPFAYSAILIALNPSNIYFEDIPWRVSLLLGSGPSLATTLVLFCSHFHQISEDKKHGKNSPLVRLGAKKGSQFVPWIIFTIYIFQLLTILTGFIPVFCILYLISFPQAIKLINLLKYSYRKPSAIKNSKFIAIKFQTFNGVGLITGLIFNYLLNK------
	45578	GC_00000882		MIT9301	24619	ECG	167546.P9301_01961	1,4-dihydroxy-2-naphthoate octaprenyltransferase					TIGR02235	menA_cyano-plnt: 1,4-dihydroxy-2-naphthoate phytyltransferase			H	H	PIRSF005355	PIRSF005355	COG1575	1,4-dihydroxy-2-naphthoate octaprenyltransferase	MF_01938	1,4-dihydroxy-2-naphthoate phytyltransferase [menA].			PF01040	UbiA prenyltransferase family									-------------------------MDEDKKKLWKKAIKWPLYSVAILPVLITGAYLLNQYEEVKIYNLISFTLAAILILLWENLTNDLYDAETGIDEF-KFHSIVNLVKNKNIISFIAYTSLVIGLLIILIISVSTSINIFILVAACCFLGYLYQGPPFRLGYQGLGEPLCWLAFGPFAYSAVLIALNPSNIYFKDIPWKVSLLLGSGPSLATTLVLFCSHFHQISEDKKHGKNSPLVRLGAKKGSQFVPWIIFTIYIFQLFTIVYGFIPVFCILYLLSFPQAKRLINLLKSSYAKPSAIKNCKFIAIKFQTLNGIGLITGLIFNYLLNK------
	45576	GC_00000882		MIT9302	27091	ECG	93060.P9215_01941	1,4-dihydroxy-2-naphthoate octaprenyltransferase					TIGR02235	menA_cyano-plnt: 1,4-dihydroxy-2-naphthoate phytyltransferase			H	H	PIRSF005355	PIRSF005355	COG1575	1,4-dihydroxy-2-naphthoate octaprenyltransferase	MF_01938	1,4-dihydroxy-2-naphthoate phytyltransferase [menA].			PF01040	UbiA prenyltransferase family									-------------------------MDEDKKKLWKQAIKWPLYSVAILPVLITGAYILNQYEKVKIYNLIAFTLAAIFILLWENLTNDLFDAETGIDEF-KFHSIVNLIKNKKIISFIAYTSLVIGLLIISIISVSTSINILILVASCCFLGYLYQGPPFRFGYQGLGEPLCWLAFGPFAYSAVLIALNPSNIYFEDIPWKVSLLLGSGPSLATTLVLFCSHFHQISEDKKHGKNSPLVRLGAKKGSQFVPWIIFTIYIFQLLTIVTGFIPVLCILYLISFPQAIRLINLLKSSYKKPSAIKNSKFVAIKFQTLNGVGLITGLIFNYLLNK------
	45560	GC_00000882		MIT9303	30679	ECG	221359.RS9916_36182	1,4-dihydroxy-2-naphthoate octaprenyltransferase					TIGR02235	menA_cyano-plnt: 1,4-dihydroxy-2-naphthoate phytyltransferase			H	H	PIRSF005355	PIRSF005355	COG1575	1,4-dihydroxy-2-naphthoate octaprenyltransferase	MF_01938	1,4-dihydroxy-2-naphthoate phytyltransferase [menA].			PF01040	UbiA prenyltransferase family									-------------MPDQQDVASLYAKASTRRALWKAAIKWPMYSVAVMPALLAAGWLVGAGEAVRLDQLLGFLVAAVLLLLWENLSNDLFDADTGVDSFTKLHSVVALLGQRRPVRRFAHLALVLGLLLMLVLALRSSAAVLFLVLVSCGLGYLYQGPPFRWGYIGLGEPLCWLAFGPFATAAALLALAPLNSDGSVIPWATAFTLGSGPALATTLVLFCSHFHQVAEDAAFGKRSPVVRLGTARAAALVPWILSLVFALEWIPVLQGDWPLTALLGGLGLPAGAALIRLLRHHHDQPEKIRGSKFLALRFQALNGLGLSLGLALAPYLGFAMSSAG
	45584	GC_00000882		MIT9311	32166	ECG	74546.PMT9312_0178	1,4-dihydroxy-2-naphthoate octaprenyltransferase					TIGR02235	menA_cyano-plnt: 1,4-dihydroxy-2-naphthoate phytyltransferase			H	H	PIRSF005355	PIRSF005355	COG1575	1,4-dihydroxy-2-naphthoate octaprenyltransferase	MF_01938	1,4-dihydroxy-2-naphthoate phytyltransferase [menA].			PF01040	UbiA prenyltransferase family									-------------------------MDENKKKLWKQAIKWPLYSVAILPVFITGAYLLNQYETVKIYNLLAFTLAAILILLWENLTNDLFDAETGIDEF-KFHSIVNLIKNKKLISFIAYTSLVIGLLIISIISVSTSVNILILVAACCFLGYLYQGPPFRFGYQGLGEPLCWLAFGPFAYSAVLIALNPSNIYFEDIPWKVSLLLGSGPSLATTLVLFCSHFHQIIEDEKHGKHSPLVRLGAKKGSQFVPWIIFTIYIFQLFTILTGFIPIFCILYLISFPQAIRLINLLHSSYNKPLAIKNCKFIAIKFQTLNGIGLITGLIFNYLINK------
	45573	GC_00000882		MIT9312	33047	ECG	74546.PMT9312_0178	1,4-dihydroxy-2-naphthoate octaprenyltransferase					TIGR02235	menA_cyano-plnt: 1,4-dihydroxy-2-naphthoate phytyltransferase			H	H	PIRSF005355	PIRSF005355	COG1575	1,4-dihydroxy-2-naphthoate octaprenyltransferase	MF_01938	1,4-dihydroxy-2-naphthoate phytyltransferase [menA].			PF01040	UbiA prenyltransferase family									-------------------------MDENKKKLWKQAIKWPLYSVAILPVFITGAYLLNQYETVKIYNLLAFTLAAILILLWENLTNDLFDAETGIDEF-KFHSIVNLIKNKKLISFIAYTSLVIGLLIISIISVSTSVNILILVAACCFLGYLYQGPPFRFGYQGLGEPLCWLAFGPFAYSAVLIALNPSNIYFEDIPWKVSLLLGSGPSLATTLVLFCSHFHQIIEDEKHGKHSPLVRLGAKKGSQFVPWIIFTIYIFQLFTILTGFIPIFCILYLISFPQAIRLINLLHSSYNKPLAIKNCKFIAIKFQTLNGIGLITGLIFNYLINK------
	45565	GC_00000882		MIT9314	38318	EAG	93060.P9215_01941	1,4-dihydroxy-2-naphthoate octaprenyltransferase					TIGR02235	menA_cyano-plnt: 1,4-dihydroxy-2-naphthoate phytyltransferase			H	H	PIRSF005355	PIRSF005355	COG1575	1,4-dihydroxy-2-naphthoate octaprenyltransferase	MF_01938	1,4-dihydroxy-2-naphthoate phytyltransferase [menA].			PF01040	UbiA prenyltransferase family									-------------------------MDEDKKKLWQQAIKWPLYSVAILPVLITGAYVLNQYEKVKIYNLIAFTLAAIFILLWENLTNDLFDAETGIDEF-KFHSIVNLVKNKKIISFIAYTSLFIGLLIISIISLSTSINILILVASCCFLGYLYQGPPFRFGYQGLGEPLCWLAFGPFAYSAILIALNPSNIYFVDIPWRVSLLLGSGPSLATTLVLFCSHFHQISEDKKHGKNSPLVRLGAKKGSQFVPWIIFTIYIFQLLTIFTGFIPVFCILYLISFPQAIRLINLLKYSYRKPFAIKNSKFVAIKFQTLNGVGLITGLIFNYLLNK------
	45571	GC_00000882		MIT9321	39896	ECG	74546.PMT9312_0178	1,4-dihydroxy-2-naphthoate octaprenyltransferase					TIGR02235	menA_cyano-plnt: 1,4-dihydroxy-2-naphthoate phytyltransferase			H	H	PIRSF005355	PIRSF005355	COG1575	1,4-dihydroxy-2-naphthoate octaprenyltransferase	MF_01938	1,4-dihydroxy-2-naphthoate phytyltransferase [menA].			PF01040	UbiA prenyltransferase family									-------------------------MDEDKKKLWKQAIKWPLYSVAILPVFITGAYLLNKYEKVKIYNLIAFTLAAILILLWENLTNDLFDAETGIDEF-KFHSIVNLVKNKEIISFIAYSSLVIGLLIISIISVSTSINILILVAACCFLGYLYQGPPFRFGYQGLGEPLCWLAFGPFAYSAVLIALNPSNIFFEDIPWKVSLLLGSGPSLATTLVLFCSHFHQISEDKKHGKNSPLVRLGAKKGSQFVPWIIFTIYSFQLFTIVNGFIPVFCILYLISFPQAIRLINLLRSSYKNPSAIKNCKFIAIKFQTLNGVGLITGLIFNYLLNK------
	45563	GC_00000882		MIT9322	41661	ECG	74546.PMT9312_0178	1,4-dihydroxy-2-naphthoate octaprenyltransferase					TIGR02235	menA_cyano-plnt: 1,4-dihydroxy-2-naphthoate phytyltransferase			H	H	PIRSF005355	PIRSF005355	COG1575	1,4-dihydroxy-2-naphthoate octaprenyltransferase	MF_01938	1,4-dihydroxy-2-naphthoate phytyltransferase [menA].			PF01040	UbiA prenyltransferase family									-------------------------MDEDKKKLWKQAIKWPLYSVAILPVFITGAYLLNKYEKVKIYNLIAFTLAAILILLWENLTNDLFDAETGIDEF-KFHSIVNLVKNKEIISFIAYSSLVIGLLIISIISVSTSINILILVAACCFLGYLYQGPPFRFGYQGLGEPLCWLAFGPFAYSAVLIALNPSNIFFEDIPWKVSLLLGSGPSLATTLVLFCSHFHQISEDKKHGKNSPLVRLGAKKGSQFVPWIIFTIYSFQLFTIVNGFIPVFCILYLISFPQAIRLINLLRSSYKNPSAIKNCKFIAIKFQTLNGVGLITGLIFNYLLNK------
	45581	GC_00000882		MIT9401	43639	ECG	74546.PMT9312_0178	1,4-dihydroxy-2-naphthoate octaprenyltransferase					TIGR02235	menA_cyano-plnt: 1,4-dihydroxy-2-naphthoate phytyltransferase			H	H	PIRSF005355	PIRSF005355	COG1575	1,4-dihydroxy-2-naphthoate octaprenyltransferase	MF_01938	1,4-dihydroxy-2-naphthoate phytyltransferase [menA].			PF01040	UbiA prenyltransferase family									-------------------------MDEDKKKLWKQAIKWPLYSVAILPVFITGAYLLNKYEKVKIYNLIAFTLAAILILLWENLTNDLFDAETGIDEF-KFHSIVNLVKNKEIISFIAYSSLVIGLLIISIISVSTSINILILVAACCFLGYLYQGPPFRFGYQGLGEPLCWLAFGPFAYSAVLIALNPSNIFFEDIPWKVSLLLGSGPSLATTLVLFCSHFHQISEDKKHGKNSPLVRLGAKKGSQFVPWIIFTIYSFQLFTIVNGFIPVFCILYLISFPQAIRLINLLRSSYKNPSAIKNCKFIAIKFQTLNGVGLITGLIFNYLLNK------
	45564	GC_00000882		MIT9515	45107	ECG	167542.P9515_02051	1,4-dihydroxy-2-naphthoate octaprenyltransferase					TIGR02235	menA_cyano-plnt: 1,4-dihydroxy-2-naphthoate phytyltransferase			H	H	PIRSF005355	PIRSF005355	COG1575	1,4-dihydroxy-2-naphthoate octaprenyltransferase	MF_01938	1,4-dihydroxy-2-naphthoate phytyltransferase [menA].			PF01040	UbiA prenyltransferase family									-------------------------MNERNKSLWKQAIKWPLYSVAILPVFISGAYTLNSFKNIKISNLIAFTIAAILILIWENLTNDLFDSETGIDEF-KFHSIVNLVRSKKIISTIAYTSLLIGLLVIAIISISTSINVMILVVSCCFLGYLYQGPPFRLGYQGLGEPLCWLAFGPLTYSAALIALNPSDIYTITIPWKDSFLLGSGSSLATTLILFCSHFHQIEEDKKHGKNSPLVRLGPKKGAKLIPWIVFIVYFFQLFIIINGFIPILCILFLISLPQSIKLITLLKSSYNKPEVIKNCKFIAVKFQTLNGIGLIAGLIIDYLINK------
	45583	GC_00000882		NATL1A	47014	ECG	167555.NATL1_02511	1,4-dihydroxy-2-naphthoate octaprenyltransferase					TIGR02235	menA_cyano-plnt: 1,4-dihydroxy-2-naphthoate phytyltransferase			H	H	PIRSF005355	PIRSF005355	COG1575	1,4-dihydroxy-2-naphthoate octaprenyltransferase	MF_01938	1,4-dihydroxy-2-naphthoate phytyltransferase [menA].			PF01040	UbiA prenyltransferase family									MHELLPSLKGYTKKQTGRISLSVKSSTTERKHLWQAAIKWPLYSVAIMPVIVSAGWELGNSGNIRLGQFIGFLIASILILLWENLTNDLFDDETGVDKY-KFHSVVALTGSKSTVSRVAYFSLLLGLFIIFILALKSKITVLFLVIICCFLGYLYQGPPFRLGYKGLGEPLCWIAFGPLATAAALIVISPKS-NFDTIPWGTALIVGAGPAMATTLVLFCSHFHQINQDAAVGKKSPLVILGTHRAAEFLPWFVGLILLLELLPVLLGIWPITTLICLISLPSGLDLIKLIKRHHNQPERIKNSKFLALRFQTINGLCLSIGFAISSFFYN------
	45562	GC_00000882		NATL2A	49030	ECG	167555.NATL1_02511	1,4-dihydroxy-2-naphthoate octaprenyltransferase					TIGR02235	menA_cyano-plnt: 1,4-dihydroxy-2-naphthoate phytyltransferase			H	H	PIRSF005355	PIRSF005355	COG1575	1,4-dihydroxy-2-naphthoate octaprenyltransferase	MF_01938	1,4-dihydroxy-2-naphthoate phytyltransferase [menA].			PF01040	UbiA prenyltransferase family									----------------------MKSSTTERKHLWQAAIKWPLYSVAIMPVIVSAGWELGNSGNIRLGQFIGFLIASILILLWENLTNDLFDDETGVDKY-KFHSVVALTGNKTTVSRVAYFSLLLGLFIIFILALKSKITVLFLVIICCFLGYLYQGPPFRLGYKGLGEPLCWIAFGPLATAAALIVISPKS-NFDAIPWGTALIVGAGPAMATTLVLFCSHFHQINQDAAVGKKSPLVVLGTNRAANFLPWLVGLIFLLELLPVLNGIWPITTLMCLISLPSGLDLIKLIKRHHNKPELIKNSKFSALRFQTINGLCLSIGFATSYFFL-------
	45561	GC_00000882		PAC1	51145	ECG	167555.NATL1_02511	1,4-dihydroxy-2-naphthoate octaprenyltransferase					TIGR02235	menA_cyano-plnt: 1,4-dihydroxy-2-naphthoate phytyltransferase			H	H	PIRSF005355	PIRSF005355	COG1575	1,4-dihydroxy-2-naphthoate octaprenyltransferase	MF_01938	1,4-dihydroxy-2-naphthoate phytyltransferase [menA].			PF01040	UbiA prenyltransferase family									MHELLPSLKGYTKKQTGRISLSVKSSTTERKHLWQAAIKWPLYSVAIMPVIVSAGWELGNSGNIRLGQFIGFLIASILILLWENLTNDLFDDETGVDKY-KFHSVVALTGSKSTVSRVAYFSLLLGLFIIFILALKSKITVLFLVIICCFLGYLYQGPPFRLGYKGLGEPLCWIAFGPLATAAALIVISPKS-NFDTIPWGTALIVGAGPAMATTLVLFCSHFHQINQDAAVGKKSPLVILGTHRAAEFLPWFVGLIFLLELLPVLLGIWPITTLICLISLPSGLDLIKLIKRHHNQPERIKNSKFLALRFQTINGLCLSIGFAISSFFYN------
	45575	GC_00000882		SB	53863	ECG	146891.A9601_01941	1,4-dihydroxy-2-naphthoate octaprenyltransferase					TIGR02235	menA_cyano-plnt: 1,4-dihydroxy-2-naphthoate phytyltransferase			H	H	PIRSF005355	PIRSF005355	COG1575	1,4-dihydroxy-2-naphthoate octaprenyltransferase	MF_01938	1,4-dihydroxy-2-naphthoate phytyltransferase [menA].			PF01040	UbiA prenyltransferase family									-------------------------MDEDKKKLWKKAIKWPLYSVAILPVLITGAYLLNQYEEVKIYNLISFTLAAILILLWENLTNDLYDAETGIDEF-KFHSIVNLVKNKKIISFIAYTSLVIGLLIILIISVSTSINIFILVAACCFLGYLYQGPPFRLGYQGLGEPLCWLAFGPFAYSAVLIALNPSNIYFEDIPWKVSLLLGSGPSLATTLVLFCSHFHQISEDKKHGKNSPLVRLGAKKGSQFVPWIIFTIYIFQLFTIVYGFIPVFCILYLLSFPQAIRLINLLKSSYAKPSAIKNCKFVAIKFQTLNGIGLITGLIFNYLLNK------
	42592	GC_00002222		CCMP1375	2064	NA	167539.Pro0201	1,4-dihydroxy-2-naphthoate octaprenyltransferase					TIGR02235	menA_cyano-plnt: 1,4-dihydroxy-2-naphthoate phytyltransferase			H	H	PIRSF005355	PIRSF005355	COG1575	1,4-dihydroxy-2-naphthoate octaprenyltransferase	MF_01938	1,4-dihydroxy-2-naphthoate phytyltransferase [menA].			PF01040	UbiA prenyltransferase family									MKDKNAVASLHSSSIPRKKLWKKAIKWPLYSVAIMPVILAAGWKQGAGEIIRLDQLVGFLIASILLLIWENLTNDLFDSTTGVDEF-KLHSIVVLTGRRRLIRNLAYFILFLGLILILILASRSHQAVFFLVIGSCALGYLYQGPPFRLGYQGLGEPLCWLAFGPLATAASLLVLSTNVNHTNPIPWKAAISLGAGPAVATTLVLFCANFHQVSEDAAHGKKTLLVRLGTGRAAAIVPWFILLCLGLEWIPIVYGQWPVTALLGGIGIPPAIKLIRLLTDHHNHPKLISESKFLALRFQALNGIGLSIGLALAPFLGIELQH--
	42589	GC_00002222		LG	8336	NA	167539.Pro0201	1,4-dihydroxy-2-naphthoate octaprenyltransferase					TIGR02235	menA_cyano-plnt: 1,4-dihydroxy-2-naphthoate phytyltransferase			H	H	PIRSF005355	PIRSF005355	COG1575	1,4-dihydroxy-2-naphthoate octaprenyltransferase	MF_01938	1,4-dihydroxy-2-naphthoate phytyltransferase [menA].			PF01040	UbiA prenyltransferase family									MKDKNAVASLHSSSIPRKKLWKKAIKWPLYSVAIMPVILAAGWKQGAGEIIRLDQLVGFLIASILLLIWENLTNDLFDSTTGVDEF-KLHSIVVLTGRRRLIRNLAYFILFLGLILILILASRSHQAVFFLVIGSCALGYLYQGPPFRLGYQGLGEPLCWLAFGPLATAASLLVLSTNVNHTNPIPWKAAISLGAGPAVATTLVLFCANFHQVSEDAAHGKKTLLVRLGTGRAAAIVPWFILLCLGLEWIPIVYGQWPVTALLGGIGIPPAIKLIRLLTDHHNHPKLISESKFLALRFQALNGIGLSIGLALAPFLGIELQH--
	42588	GC_00002222		MIT9313	37073	ECG	221359.RS9916_36182	1,4-dihydroxy-2-naphthoate octaprenyltransferase					TIGR02235	menA_cyano-plnt: 1,4-dihydroxy-2-naphthoate phytyltransferase			H	H	PIRSF005355	PIRSF005355	COG1575	1,4-dihydroxy-2-naphthoate octaprenyltransferase	MF_01938	1,4-dihydroxy-2-naphthoate phytyltransferase [menA].			PF01040	UbiA prenyltransferase family									MPDQQDVASLYAKASTRRALWKAAIKWPMYSVAVMPALLAAGWRVGAGEAVRLDQLLGFLVAAVLLLLWENLSNDLFDADTGVDSFTKLHSVVALLGQRRPVRRFAHLALVLGLLLMLLLALRSSAAVLFLVLVSCGLGYLYQGPPFRWGYIGLGEPLCWLAFGPFATAAALLALAPLNGDGSVIPWATAFTLGSGPALATTLVLFCSHFHQVAEDAAFGKRSPVVRLGTARAAALVPWILSLVFALEWIPVLQGDWPLTALLGGLGLPAGAALVRLLRHHHDQPEKIRGSKFLALRFQALNGLGLSLGLALAPCLGFALSSAG
	42587	GC_00002222		SS2	56359	NA	167539.Pro0201	1,4-dihydroxy-2-naphthoate octaprenyltransferase					TIGR02235	menA_cyano-plnt: 1,4-dihydroxy-2-naphthoate phytyltransferase			H	H	PIRSF005355	PIRSF005355	COG1575	1,4-dihydroxy-2-naphthoate octaprenyltransferase	MF_01938	1,4-dihydroxy-2-naphthoate phytyltransferase [menA].			PF01040	UbiA prenyltransferase family									MKDKNAVASLHSSSIPRKKLWKKAIKWPLYSVAIMPVILAAGWKQGAGEIIRLDQLVGFLIASILLLIWENLTNDLFDSTTGVDEF-KLHSIVVLTGRRRLIRNLAYFILFLGLILILILASRSHQAVFFLVIGSCALGYLYQGPPFRLGYQGLGEPLCWLAFGPLATAASLLVLSTNVNHTNPIPWKAAISLGAGPAVATTLVLFCANFHQVSEDAAHGKKTLLVRLGTGRAAAIVPWFILLCLGLEWIPIVYGQWPVTALLGGIGIPPAIKLIRLLTDHHNHPKLISESKFLALRFQALNGIGLSIGLALAPFLGIELQH--
	42591	GC_00002222		SS35	58000	NA	167539.Pro0201	1,4-dihydroxy-2-naphthoate octaprenyltransferase					TIGR02235	menA_cyano-plnt: 1,4-dihydroxy-2-naphthoate phytyltransferase			H	H	PIRSF005355	PIRSF005355	COG1575	1,4-dihydroxy-2-naphthoate octaprenyltransferase	MF_01938	1,4-dihydroxy-2-naphthoate phytyltransferase [menA].			PF01040	UbiA prenyltransferase family									MKDKNAVASLHSSSIPRKKLWKKAIKWPLYSVAIMPVILAAGWKQGAGEIIRLDQLVGFLIASILLLIWENLTNDLFDSTTGVDEF-KLHSIVVLTGRRRLIRNLAYFILFLGLILILILASRSHQAVFFLVIGSCALGYLYQGPPFRLGYQGLGEPLCWLAFGPLATAASLLVLSTNVNHTNPIPWKAAISLGAGPAVATTLVLFCANFHQVSEDAAHGKKTLLVRLGTGRAAAIVPWFILLCLGLEWIPIVYGQWPVTALLGGIGIPPAIKLIRLLTDHHNHPKLISESKFLALRFQALNGIGLSIGLALAPFLGIELQH--
	42590	GC_00002222		SS51	59293	NA	167539.Pro0201	1,4-dihydroxy-2-naphthoate octaprenyltransferase					TIGR02235	menA_cyano-plnt: 1,4-dihydroxy-2-naphthoate phytyltransferase			H	H	PIRSF005355	PIRSF005355	COG1575	1,4-dihydroxy-2-naphthoate octaprenyltransferase	MF_01938	1,4-dihydroxy-2-naphthoate phytyltransferase [menA].			PF01040	UbiA prenyltransferase family									MKDKNAVASLHSSSIPRKKLWKKAIKWPLYSVAIMPVILAAGWKQGAGEIIRLDQLVGFLIASILLLIWENLTNDLFDSTTGVDEF-KLHSIVVLTGRRRLIRNLAYFILFLGLILILILASRSHQAVFFLVIGSCALGYLYQGPPFRLGYQGLGEPLCWLAFGPLATAASLLVLSTNVNHTNPIPWKAAISLGAGPAVATTLVLFCANFHQVSEDAAHGKKTLLVRLGTGRAAAIVPWFILLCLGLEWIPIVYGQWPVTALLGGIGIPPAIKLIRLLTDHHNHPKLISESKFLALRFQALNGIGLSIGLALAPFLGIELQH--
	40439	GC_00001229	HL Core	AS9601	302	ECG	146891.A9601_03101	2-amino-4-hydroxy-6- hydroxymethyldihydropteridine pyrophosphokinase	G3DSA:3.30.70.560	G3DSA:3.30.70.560			TIGR01498	folK: 2-amino-4-hydroxy-6-hydroxymethyldihydropteridine diphosphokinase			H	H			COG0801	7,8-dihydro-6-hydroxymethylpterin-pyrophosphokinase					PF01288	7,8-dihydro-6-hydroxymethylpterin-pyrophosphokinase (HPPK)					SSF55083	SSF55083			----MELSNLNIKNGLCISLGANIDSKFGSPLESLLICKPKIEEIINEWGDSSNEKKEEKSEFHANFFWSSIYETLPHGVENEQPNYLNTLLLIKSNSFPKPSNKNAKLLLKELKKLEKFFGREKTPKGKKWLSRCLDLDILWWEDFHTIDEELTLPHPRFMNRNFVITPLSEILSRSQKITKFDDPKWSIN-
	40451	GC_00001229	HL Core	EQPAC1	5520	ECG	59919.PMM0287	2-amino-4-hydroxy-6- hydroxymethyldihydropteridine pyrophosphokinase	G3DSA:3.30.70.560	G3DSA:3.30.70.560			TIGR01498	folK: 2-amino-4-hydroxy-6-hydroxymethyldihydropteridine diphosphokinase			H	H			COG0801	7,8-dihydro-6-hydroxymethylpterin-pyrophosphokinase					PF01288	7,8-dihydro-6-hydroxymethylpterin-pyrophosphokinase (HPPK)					SSF55083	SSF55083			----MELSNLNIKNGLCISLGANIDSKFGSPLESLLICKPKIEEIINEWGDLYNNKKEEKRKFHANFFWSSIYETLPHGVENEQPNYLNTLLLIKSNSFPKTSNKNAKLLLKELKKLERFFGRKETPKGKKWLSRCLDLDILWWEDFYTVDEKLTLPHPRFMNRNFVITPLSEILSRSQKIKKFDAPKWTI--
	40440	GC_00001229	HL Core	GP2	6025	ECG	146891.A9601_03101	2-amino-4-hydroxy-6- hydroxymethyldihydropteridine pyrophosphokinase	G3DSA:3.30.70.560	G3DSA:3.30.70.560			TIGR01498	folK: 2-amino-4-hydroxy-6-hydroxymethyldihydropteridine diphosphokinase			H	H			COG0801	7,8-dihydro-6-hydroxymethylpterin-pyrophosphokinase					PF01288	7,8-dihydro-6-hydroxymethylpterin-pyrophosphokinase (HPPK)					SSF55083	SSF55083			----MELSNLNIKNGLCISLGANIDSKFGSPLESLLICKPKIEEIINEWGDSSNEKKEEKSKFHANFFWSSIYETLPHGVDNEQPNYLNTLLLIKSNSFPKPSNKNAKLLLKELKKLERFFGREETPKGKKWLSRCLDLDILWWEDFHTFDEELTLPHPRFMNRNFVITPLSEILSRSQKITKFDEPKWSI--
	40445	GC_00001229	HL Core	MED4	9541	ECG	59919.PMM0287	2-amino-4-hydroxy-6- hydroxymethyldihydropteridine pyrophosphokinase	G3DSA:3.30.70.560	G3DSA:3.30.70.560			TIGR01498	folK: 2-amino-4-hydroxy-6-hydroxymethyldihydropteridine diphosphokinase			H	H			COG0801	7,8-dihydro-6-hydroxymethylpterin-pyrophosphokinase					PF01288	7,8-dihydro-6-hydroxymethylpterin-pyrophosphokinase (HPPK)					SSF55083	SSF55083			----MELSNLNIKNGLCISLGANIDSKFGSPLESLLICKPKIEEIINEWGDLYNNKKEEKRKFHANFFWSSIYETLPHGVENEQPNYLNTLLLIKSNSFPKTSNKNAKLLLKELKKLERFFGRKETPKGKKWLSRCLDLDILWWEDFYTVDEKLTLPHPRFMNRNFVITPLSEILSRSQKIKKFDAPKWTI--
	40438	GC_00001229	HL Core	MIT9107	12719	ECG	93060.P9215_03121	2-amino-4-hydroxy-6- hydroxymethyldihydropteridine pyrophosphokinase	G3DSA:3.30.70.560	G3DSA:3.30.70.560			TIGR01498	folK: 2-amino-4-hydroxy-6-hydroxymethyldihydropteridine diphosphokinase			H	H			COG0801	7,8-dihydro-6-hydroxymethylpterin-pyrophosphokinase					PF01288	7,8-dihydro-6-hydroxymethylpterin-pyrophosphokinase (HPPK)					SSF55083	SSF55083			#NAME?
	40437	GC_00001229	HL Core	MIT9116	14715	ECG	93060.P9215_03121	2-amino-4-hydroxy-6- hydroxymethyldihydropteridine pyrophosphokinase	G3DSA:3.30.70.560	G3DSA:3.30.70.560			TIGR01498	folK: 2-amino-4-hydroxy-6-hydroxymethyldihydropteridine diphosphokinase			H	H			COG0801	7,8-dihydro-6-hydroxymethylpterin-pyrophosphokinase					PF01288	7,8-dihydro-6-hydroxymethylpterin-pyrophosphokinase (HPPK)					SSF55083	SSF55083			#NAME?
	40441	GC_00001229	HL Core	MIT9123	15258	ECG	93060.P9215_03121	2-amino-4-hydroxy-6- hydroxymethyldihydropteridine pyrophosphokinase	G3DSA:3.30.70.560	G3DSA:3.30.70.560			TIGR01498	folK: 2-amino-4-hydroxy-6-hydroxymethyldihydropteridine diphosphokinase			H	H			COG0801	7,8-dihydro-6-hydroxymethylpterin-pyrophosphokinase					PF01288	7,8-dihydro-6-hydroxymethylpterin-pyrophosphokinase (HPPK)					SSF55083	SSF55083			#NAME?
	40443	GC_00001229	HL Core	MIT9201	18512	ECG	146891.A9601_03101	2-amino-4-hydroxy-6- hydroxymethyldihydropteridine pyrophosphokinase	G3DSA:3.30.70.560	G3DSA:3.30.70.560			TIGR01498	folK: 2-amino-4-hydroxy-6-hydroxymethyldihydropteridine diphosphokinase			H	H			COG0801	7,8-dihydro-6-hydroxymethylpterin-pyrophosphokinase					PF01288	7,8-dihydro-6-hydroxymethylpterin-pyrophosphokinase (HPPK)					SSF55083	SSF55083			----MELSNLNIKNGLCISLGANIDSKFGSPLESLLICKPKIEEIVNEWGDSSNTKKVQKSKFHANFFWSSIYETLPHGVENEQPNYLNTLLLIKSNSFPKPSNKKAKLLLKKLKKLERFFGREETPKGKKWLSRCLDLDILWWEDFHTFDEELTLPHPRFMNRNFVITPLSEILSRSQKITKFDSPKWSI--
	40448	GC_00001229	HL Core	MIT9202	19935	EAG	93060.P9215_03121	2-amino-4-hydroxy-6- hydroxymethyldihydropteridine pyrophosphokinase	G3DSA:3.30.70.560	G3DSA:3.30.70.560			TIGR01498	folK: 2-amino-4-hydroxy-6-hydroxymethyldihydropteridine diphosphokinase			H	H			COG0801	7,8-dihydro-6-hydroxymethylpterin-pyrophosphokinase					PF01288	7,8-dihydro-6-hydroxymethylpterin-pyrophosphokinase (HPPK)					SSF55083	SSF55083			----MELSNLNIKNGLCISLGANIDSKFGSPFESLLICKPKIEEIINEWGDLSNKKKEEKRKFHANFLWSSIYETLPHGVENEQPNYFNTLLLIQSNSFPKPSNKNAKLLLKELKKLEGFFGREKTPKGKKWLSRCLDLDILWWENFHMFDEELTLPHPRFMNRNFVITPLSEVLSRSQKIKKFDDPKWSIK-
	40450	GC_00001229	HL Core	MIT9215	22777	ECG	93060.P9215_03121	2-amino-4-hydroxy-6- hydroxymethyldihydropteridine pyrophosphokinase	G3DSA:3.30.70.560	G3DSA:3.30.70.560			TIGR01498	folK: 2-amino-4-hydroxy-6-hydroxymethyldihydropteridine diphosphokinase	Coil	Coil	H	H			COG0801	7,8-dihydro-6-hydroxymethylpterin-pyrophosphokinase					PF01288	7,8-dihydro-6-hydroxymethylpterin-pyrophosphokinase (HPPK)					SSF55083	SSF55083			----MELSNLNIKNGLCISLGANIDSKFGSPFESLLICKPKIEEIINEWGHLSNKKKEEKRNFHANFLWSSIYETLPHGVENEQPNYFNTLLLIQSNSFPKPSNKNAKLLLKELKKLEGFFGREKTPKGKKWLSRCLDLDILWWEDFHTFDEELTLPHPRFMNRNFVITPLSEILSRSQKIKKFDDPKWSIK-
	40449	GC_00001229	HL Core	MIT9301	24728	ECG	167546.P9301_03111	2-amino-4-hydroxy-6- hydroxymethyldihydropteridine pyrophosphokinase	G3DSA:3.30.70.560	G3DSA:3.30.70.560			TIGR01498	folK: 2-amino-4-hydroxy-6-hydroxymethyldihydropteridine diphosphokinase			H	H			COG0801	7,8-dihydro-6-hydroxymethylpterin-pyrophosphokinase					PF01288	7,8-dihydro-6-hydroxymethylpterin-pyrophosphokinase (HPPK)					SSF55083	SSF55083			----MELSNLNIKNGLCISLGANIDSKFGSPLESLLICKPKIKEIINEWGDSSNEKKEEKSKFNANFFWSSIYETLPHGVDNEQPNYLNTLLLIKSNSFPKPSTKNAKLLLKELKKLERFFGREETPKGKKWLSRCLDLDILWWEDFHTVDEELTLPHPRFMNRNFVITPLSEILSRSQKITKFDDPKWSIN-
	40447	GC_00001229	HL Core	MIT9302	28181	ECG	146891.A9601_03101	2-amino-4-hydroxy-6- hydroxymethyldihydropteridine pyrophosphokinase	G3DSA:3.30.70.560	G3DSA:3.30.70.560			TIGR01498	folK: 2-amino-4-hydroxy-6-hydroxymethyldihydropteridine diphosphokinase			H	H			COG0801	7,8-dihydro-6-hydroxymethylpterin-pyrophosphokinase					PF01288	7,8-dihydro-6-hydroxymethylpterin-pyrophosphokinase (HPPK)					SSF55083	SSF55083			----MELSNLNIKNGLCISLGANIDSKFGSPLESLLICKPKIEEIINEWGDSSNKKKEEKSKFHANFFWSSIYETLPHGVENEQPNYLNTLLLIKSNSFPKPSNKKAKLLLKELKKLERFFGREETPKGKKWLSRCLDLDILWWEDFYTVDEELTLPHPRFMNRNFVITPLSEILSRSQKITKFDAPKWSI--
	40453	GC_00001229	HL Core	MIT9311	31751	ECG	74546.PMT9312_0289	2-amino-4-hydroxy-6- hydroxymethyldihydropteridine pyrophosphokinase	G3DSA:3.30.70.560	G3DSA:3.30.70.560			TIGR01498	folK: 2-amino-4-hydroxy-6-hydroxymethyldihydropteridine diphosphokinase			H	H			COG0801	7,8-dihydro-6-hydroxymethylpterin-pyrophosphokinase					PF01288	7,8-dihydro-6-hydroxymethylpterin-pyrophosphokinase (HPPK)					SSF55083	SSF55083			----MELSNLNIKNGLCISLGANIDSKFGSPLESLLICKPKIEEIINEWGDHSNKKKEEKRKFHANFFWSSIYETLPHGVENEQPNYLNTLLLIKSNSFPKPSNKKAKLLLKELKKLERSFGREKTPKGKKWLSRCLDLDILWWEDFHTVDEELTLPHPRFMNRNFVITPLSEILSRSQKIKKFDDPKWSIK-
	40444	GC_00001229	HL Core	MIT9312	33156	ECG	74546.PMT9312_0289	2-amino-4-hydroxy-6- hydroxymethyldihydropteridine pyrophosphokinase	G3DSA:3.30.70.560	G3DSA:3.30.70.560			TIGR01498	folK: 2-amino-4-hydroxy-6-hydroxymethyldihydropteridine diphosphokinase			H	H			COG0801	7,8-dihydro-6-hydroxymethylpterin-pyrophosphokinase					PF01288	7,8-dihydro-6-hydroxymethylpterin-pyrophosphokinase (HPPK)					SSF55083	SSF55083			----MELSNLNIKNGLCISLGANIDSKFGSPLESLLICKPKIEEIINEWGDHSNKKKEEKRKFHANFFWSSIYETLPHGVENEQPNYLNTLLLIKSNSFPKPSNKKAKLLLKELKKLERSFGREKTPKGKKWLSRCLDLDILWWEDFHTVDEELTLPHPRFMNRNFVITPLSEILSRSQKIKKFDDPKWSIK-
	40436	GC_00001229	HL Core	MIT9314	38164	ECG	146891.A9601_03101	2-amino-4-hydroxy-6- hydroxymethyldihydropteridine pyrophosphokinase	G3DSA:3.30.70.560	G3DSA:3.30.70.560			TIGR01498	folK: 2-amino-4-hydroxy-6-hydroxymethyldihydropteridine diphosphokinase			H	H			COG0801	7,8-dihydro-6-hydroxymethylpterin-pyrophosphokinase					PF01288	7,8-dihydro-6-hydroxymethylpterin-pyrophosphokinase (HPPK)					SSF55083	SSF55083			----MELSNLNIKNGLCISLGANIDSKFGSPLESLLICKPKIEEIINEWGDSSNKKKEEKKKFHANFFWSSIYETLPHGVENEQPNYLNTLLLIKSNSFPKPSNKNAKLLLKELKKLERFFGREETPKGKKWLSRCLDLDILWWEDFHMFEEELTLPHPRFMNRNFVITPLSEILSRSQKITKFDDPKWSIY-
	40442	GC_00001229	HL Core	MIT9321	40007	ECG	146891.A9601_03101	2-amino-4-hydroxy-6- hydroxymethyldihydropteridine pyrophosphokinase	G3DSA:3.30.70.560	G3DSA:3.30.70.560			TIGR01498	folK: 2-amino-4-hydroxy-6-hydroxymethyldihydropteridine diphosphokinase			H	H			COG0801	7,8-dihydro-6-hydroxymethylpterin-pyrophosphokinase					PF01288	7,8-dihydro-6-hydroxymethylpterin-pyrophosphokinase (HPPK)					SSF55083	SSF55083			----MELSNLNIKNGLCISLGANIDSKFGSPLESLLMCKPKIEEIINEWGDNSNKQKKEKEKFHANFFWSSIYETLPHGVENEQPNYLNTLLVIKSNSFPKPSNKKAKLLLKELKKLEKFFGREKTPKGKKWLSRCLDLDILWWDDFHTVDEELTLPHPRFMNRNFVITPLSEILSRSQKITKFDVPKWSI--
	40434	GC_00001229	HL Core	MIT9322	41771	ECG	146891.A9601_03101	2-amino-4-hydroxy-6- hydroxymethyldihydropteridine pyrophosphokinase	G3DSA:3.30.70.560	G3DSA:3.30.70.560			TIGR01498	folK: 2-amino-4-hydroxy-6-hydroxymethyldihydropteridine diphosphokinase			H	H			COG0801	7,8-dihydro-6-hydroxymethylpterin-pyrophosphokinase					PF01288	7,8-dihydro-6-hydroxymethylpterin-pyrophosphokinase (HPPK)					SSF55083	SSF55083			----MELSNLNIKNGLCISLGANIDSKFGSPLESLLMCKPKIEEIINEWGDNSNKQKKEKEKFHANFFWSSIYETLPHGVENEQPNYLNTLLVIKSNSFPKPSNKKAKLLLKELKKLEKFFGREKTPKGKKWLSRCLDLDILWWDDFHTVDEELTLPHPRFMNRNFVITPLSEILSRSQKITKFDVPKWSI--
	40452	GC_00001229	HL Core	MIT9401	43517	ECG	146891.A9601_03101	2-amino-4-hydroxy-6- hydroxymethyldihydropteridine pyrophosphokinase	G3DSA:3.30.70.560	G3DSA:3.30.70.560			TIGR01498	folK: 2-amino-4-hydroxy-6-hydroxymethyldihydropteridine diphosphokinase			H	H			COG0801	7,8-dihydro-6-hydroxymethylpterin-pyrophosphokinase					PF01288	7,8-dihydro-6-hydroxymethylpterin-pyrophosphokinase (HPPK)					SSF55083	SSF55083			----MELSNLNIKNGLCISLGANIDSKFGSPLESLLMCKPKIEEIINEWGDNSNKQKKEKEKFHANFFWSSIYETLPHGVENEQPNYLNTLLVIKSNSFPKPSNKKAKLLLKELKKLEKFFGREKTPKGKKWLSRCLDLDILWWDDFHTVDEELTLPHPRFMNRNFVITPLSEILSRSQKITKFDVPKWSI--
	40435	GC_00001229	HL Core	MIT9515	45218	ECG	167542.P9515_03201	2-amino-4-hydroxy-6- hydroxymethyldihydropteridine pyrophosphokinase	G3DSA:3.30.70.560	G3DSA:3.30.70.560			TIGR01498	folK: 2-amino-4-hydroxy-6-hydroxymethyldihydropteridine diphosphokinase			H	H			COG0801	7,8-dihydro-6-hydroxymethylpterin-pyrophosphokinase					PF01288	7,8-dihydro-6-hydroxymethylpterin-pyrophosphokinase (HPPK)					SSF55083	SSF55083			MFFLVELSNLNIKNGLCISLGANIDSNYGKPIETFIICKPKIETLIKSWINQSKYCNKETESSETIFYWSSIYESSPHGVKDNQPNYLNTLVLVKSNSFPKQTTENAKFLLREFKNLERNFGRKKTPNNMKWLSRCLDLDILWWEDFCFKDEELILPHPRFMNRNFIISPLSEVLSRTQTVKKVEEERWLVD-
	40446	GC_00001229	HL Core	SB	53754	ECG	167546.P9301_03111	2-amino-4-hydroxy-6- hydroxymethyldihydropteridine pyrophosphokinase	G3DSA:3.30.70.560	G3DSA:3.30.70.560			TIGR01498	folK: 2-amino-4-hydroxy-6-hydroxymethyldihydropteridine diphosphokinase			H	H			COG0801	7,8-dihydro-6-hydroxymethylpterin-pyrophosphokinase					PF01288	7,8-dihydro-6-hydroxymethylpterin-pyrophosphokinase (HPPK)					SSF55083	SSF55083			----MELSNLNIKNGLCISLGANIDSKFGSPLESLLICKPKIEEIINEWGDSFNKKKEEKSKFQATFFWSSIYETLPHGVENEQPNYLNTLLLIKSNSFPKPSIKNAKLLLKKLKKLESFFGREETPKGKKWLSRCLDLDILWWEDFHTVDEELTLPHPRFMNRNFVITPLSEILSKSQKITKCDVPKWSI--
	46772	GC_00002224		CCMP1375	2178	NA	167539.Pro0318	2-amino-4-hydroxy-6- hydroxymethyldihydropteridine pyrophosphokinase	G3DSA:3.30.70.560	G3DSA:3.30.70.560			TIGR01498	folK: 2-amino-4-hydroxy-6-hydroxymethyldihydropteridine diphosphokinase			H	H			COG0801	7,8-dihydro-6-hydroxymethylpterin-pyrophosphokinase					PF01288	7,8-dihydro-6-hydroxymethylpterin-pyrophosphokinase (HPPK)					SSF55083	SSF55083	PS00794	7,8-dihydro-6-hydroxymethylpterin-pyrophosphokinase signature.	MSSINYLISKTLAIGLGANIESPAGSPAKTLITARPLLENTITSWIKKSLKNASKNSIE-DSTIDFSWSPLYRTAPLGGPKTQPSFINAALVIREGGLNQLIPSVEAARDLLNNLLLLEKHFGRDREISKIHWGPRSLDLDILAWGDLQINDSDLILPHPYLIERDFVIIPLAQALVKKSSSPIQIPSQKGWPE
	46768	GC_00002224		LG	8733	NA	167539.Pro0318	2-amino-4-hydroxy-6- hydroxymethyldihydropteridine pyrophosphokinase	G3DSA:3.30.70.560	G3DSA:3.30.70.560			TIGR01498	folK: 2-amino-4-hydroxy-6-hydroxymethyldihydropteridine diphosphokinase			H	H			COG0801	7,8-dihydro-6-hydroxymethylpterin-pyrophosphokinase					PF01288	7,8-dihydro-6-hydroxymethylpterin-pyrophosphokinase (HPPK)					SSF55083	SSF55083	PS00794	7,8-dihydro-6-hydroxymethylpterin-pyrophosphokinase signature.	MSSINYLISKTLAIGLGANIESPAGSPAKTLITARPLLENTITSWIKKSLKNASKNSIE-DSTIDFSWSPLYRTAPLGGPKTQPSFINAALVIREGGLNQLIPSVEAARDLLNNLLLLEKHFGRDREISKIHWGPRSLDLDILAWGDLQINDSDLILPHPYLIERDFVIIPLAQALVKKSSSPIQIPSQKGWPE
	46770	GC_00002224		MIT9211	21034	NA	93059.P9211_03131	2-amino-4-hydroxy-6- hydroxymethyldihydropteridine pyrophosphokinase	G3DSA:3.30.70.560	G3DSA:3.30.70.560			TIGR01498	folK: 2-amino-4-hydroxy-6-hydroxymethyldihydropteridine diphosphokinase			H	H			COG0801	7,8-dihydro-6-hydroxymethylpterin-pyrophosphokinase					PF01288	7,8-dihydro-6-hydroxymethylpterin-pyrophosphokinase (HPPK)					SSF55083	SSF55083	PS00794	7,8-dihydro-6-hydroxymethylpterin-pyrophosphokinase signature.	MSSLNYYKQNTLAIALGSNIPSPAGPPVSTLITVKPQIEQLICEWI-KALVPANKTFLPIISNLHWQWSPLYETQPIGGPSNQPNYINAVLVVRGEKFASIRPTEDRAIDLLKRFLELEKNFGRARELSKVKWGPRTLDIDLLAWGDLHINKKILVLPHPRFIERDFVLIPLAASIQREAYGIRQIPPQEGWEE
	46767	GC_00002224		SS2	56473	NA	167539.Pro0318	2-amino-4-hydroxy-6- hydroxymethyldihydropteridine pyrophosphokinase	G3DSA:3.30.70.560	G3DSA:3.30.70.560			TIGR01498	folK: 2-amino-4-hydroxy-6-hydroxymethyldihydropteridine diphosphokinase			H	H			COG0801	7,8-dihydro-6-hydroxymethylpterin-pyrophosphokinase					PF01288	7,8-dihydro-6-hydroxymethylpterin-pyrophosphokinase (HPPK)					SSF55083	SSF55083	PS00794	7,8-dihydro-6-hydroxymethylpterin-pyrophosphokinase signature.	MSSINYLISKTLAIGLGANIESPAGSPAKTLITARPLLENTITSWIKKSLKNASKNSIE-DSTIDFSWSPLYRTAPLGGPKTQPSFINAALVIREGGLNQLIPSVEAARDLLNNLLLLEKHFGRDREISKIHWGPRSLDLDILAWGDLQINDSDLILPHPYLIERDFVIIPLAQALVKKSSSPIQIPSQKGWPE
	46771	GC_00002224		SS35	58114	NA	167539.Pro0318	2-amino-4-hydroxy-6- hydroxymethyldihydropteridine pyrophosphokinase	G3DSA:3.30.70.560	G3DSA:3.30.70.560			TIGR01498	folK: 2-amino-4-hydroxy-6-hydroxymethyldihydropteridine diphosphokinase			H	H			COG0801	7,8-dihydro-6-hydroxymethylpterin-pyrophosphokinase					PF01288	7,8-dihydro-6-hydroxymethylpterin-pyrophosphokinase (HPPK)					SSF55083	SSF55083	PS00794	7,8-dihydro-6-hydroxymethylpterin-pyrophosphokinase signature.	MSSINYLISKTLAIGLGANIESPAGSPAKTLITARPLLENTITSWIKKSLKNASKNSIE-DSTIDFSWSPLYRTAPLGGPKTQPSFINAALVIREGGLNQLIPSVEAARDLLNNLLLLEKHFGRDREISKIHWGPRSLDLDILAWGDLQINDSDLILPHPYLIERDFVIIPLAQALVKKSSSPIQIPSQKGWPE
	46769	GC_00002224		SS51	58468	NA	167539.Pro0318	2-amino-4-hydroxy-6- hydroxymethyldihydropteridine pyrophosphokinase	G3DSA:3.30.70.560	G3DSA:3.30.70.560			TIGR01498	folK: 2-amino-4-hydroxy-6-hydroxymethyldihydropteridine diphosphokinase			H	H			COG0801	7,8-dihydro-6-hydroxymethylpterin-pyrophosphokinase					PF01288	7,8-dihydro-6-hydroxymethylpterin-pyrophosphokinase (HPPK)					SSF55083	SSF55083	PS00794	7,8-dihydro-6-hydroxymethylpterin-pyrophosphokinase signature.	MSSINYLISKTLAIGLGANIESPAGSPAKTLITARPLLENTITSWIKKSLKNASKNSIE-DSTIDFSWSPLYRTAPLGGPKTQPSFINAALVIREGGLNQLIPSVEAARDLLNNLLLLEKHFGRDREISKIHWGPRSLDLDILAWGDLQINDSDLILPHPYLIERDFVIIPLAQALVKKSSSPIQIPSQKGWPE
	39472	GC_00003654		NATL1A	47121	ECG	167555.NATL1_03671	2-amino-4-hydroxy-6- hydroxymethyldihydropteridine pyrophosphokinase	G3DSA:3.30.70.560	G3DSA:3.30.70.560			TIGR01498	folK: 2-amino-4-hydroxy-6-hydroxymethyldihydropteridine diphosphokinase			H	H			COG0801	7,8-dihydro-6-hydroxymethylpterin-pyrophosphokinase					PF01288	7,8-dihydro-6-hydroxymethylpterin-pyrophosphokinase (HPPK)					SSF55083	SSF55083			MTYAKQKPELKLVISIGSNIPGILGDPIRTIAAMRPHIEKSVIEWNIALNHPKIDSQNFDKSLSFQWAPLFETDPLGGPIDQPRFINTVLVVEGEGFASVTPNEKAAKCLMKKFLELEKIAGRERENTEIIWGPRSLDIDFISWGGLQINTDTLILPHPRLSERNFVLIPLAEVLSKTQGKPTRISSQNIWPE
	39471	GC_00003654		NATL2A	49137	ECG	167555.NATL1_03671	2-amino-4-hydroxy-6- hydroxymethyldihydropteridine pyrophosphokinase	G3DSA:3.30.70.560	G3DSA:3.30.70.560			TIGR01498	folK: 2-amino-4-hydroxy-6-hydroxymethyldihydropteridine diphosphokinase			H	H			COG0801	7,8-dihydro-6-hydroxymethylpterin-pyrophosphokinase					PF01288	7,8-dihydro-6-hydroxymethylpterin-pyrophosphokinase (HPPK)					SSF55083	SSF55083			MTYAKQKPELKLVISIGANIPGILGDPIRTIAAMRPHIEKSIIEWNIALNHPKIDSQNFDKSLSFQWAPLFETDPLGGPIDQPKFINTVLVVEGEGFASVTPNEKAAKCLMKKFLELEKIAGRERENIEIIWGPRSLDIDFISWGGLQINTDTLILPHPRFSERNFVLIPLAEVLSKTQGKTKRISSQNIWPE
	39470	GC_00003654		PAC1	51923	ECG	167555.NATL1_03671	2-amino-4-hydroxy-6- hydroxymethyldihydropteridine pyrophosphokinase	G3DSA:3.30.70.560	G3DSA:3.30.70.560			TIGR01498	folK: 2-amino-4-hydroxy-6-hydroxymethyldihydropteridine diphosphokinase			H	H			COG0801	7,8-dihydro-6-hydroxymethylpterin-pyrophosphokinase					PF01288	7,8-dihydro-6-hydroxymethylpterin-pyrophosphokinase (HPPK)					SSF55083	SSF55083			MTYAKQKTELKLVISIGSNIPGILGDPIRTITAMRPHIEKSIIEWNIALNHLKIDSQNFDKSLSFQWAPLFETDPLGGAIDQPRFINTVLVVEGEGFASVTPNEKAAKCLMKKFLELEKIAGRERENTEIIWGPRSLDIDFISWGGLQINTDTLILPHPRLSERNFVLIPLAEVLSKTQGKPKRISSQNIWPE
	6566	GC_00005158		MIT9303	30491	ECG	74547.PMT1886	2-amino-4-hydroxy-6- hydroxymethyldihydropteridine pyrophosphokinase	G3DSA:3.30.70.560	G3DSA:3.30.70.560			TIGR01498	folK: 2-amino-4-hydroxy-6-hydroxymethyldihydropteridine diphosphokinase			H	H			COG0801	7,8-dihydro-6-hydroxymethylpterin-pyrophosphokinase					PF01288	7,8-dihydro-6-hydroxymethylpterin-pyrophosphokinase (HPPK)					SSF55083	SSF55083			MESPRLDDVCASLADQLGVSTAYSAPSTLAVALGANLASAFGPPRATLRAVRPELEQTIDEWLSTSLGEASGARVNPAGLRCRWSPLFETDPVGGPPEQPVYINAVVVVDGPRLALLQPCEAAALSLLARLLALEKRFGRDRQAELMRWESRSLDLDLLAWGALQVQHEALILPHPRLIERSFVVVPLAAALTGVGQGPRRIPPDLDWLE
	6567	GC_00005158		MIT9313	36894	ECG	74547.PMT1886	2-amino-4-hydroxy-6- hydroxymethyldihydropteridine pyrophosphokinase	G3DSA:3.30.70.560	G3DSA:3.30.70.560			TIGR01498	folK: 2-amino-4-hydroxy-6-hydroxymethyldihydropteridine diphosphokinase			H	H			COG0801	7,8-dihydro-6-hydroxymethylpterin-pyrophosphokinase					PF01288	7,8-dihydro-6-hydroxymethylpterin-pyrophosphokinase (HPPK)					SSF55083	SSF55083			MESPRLDDVCASLADQLGVSTAYSAPSTLAVALGANLASAFGPPRATLRAVRPELEQTIHEWLSTSLGEASGERVNPAGLRCRWSPLFETDPVGGPPEQPVYINAVVVVDGPRLALLQPCEAAALSLLARLLALEKRFGRDRQAELMRWESRSLDLDLLAWGALQVQHEALILPHPRLIERSFVVVPLAAALTGVAQVPRRIPPDLGWLE
	23427	GC_00001507	HL Core	AS9601	241	ECG	74546.PMT9312_0227	2-dehydro-3-deoxyphosphogluconate aldolase 4-hydroxy-2-oxoglutarate aldolase	G3DSA:3.20.20.70	G3DSA:3.20.20.70																	PF01081	KDPG and KHG aldolase					SSF51569	SSF51569			-------------MNNKEDSFSEFLKTESFFLLIKPEDNIYSNTSIRNSFFEELEYLVKLGLKNIEISWSNNENWFDFVSDIKIKYPRINLGSASIVNKQSIEDSLKIGLNFSMMKFWDKDLFNYAQSKSYLLIPGINNLKDLKEAIDLNCKIIKIYPINSKDSSIDILNYTNIDFIAAGGLSINDLKTYKSLGYKAVVIGDKAIKNKKFDPKIFEWLKNN--
	23439	GC_00001507	HL Core	EQPAC1	5582	ECG	74546.PMT9312_0227	2-dehydro-3-deoxyphosphogluconate aldolase 4-hydroxy-2-oxoglutarate aldolase	G3DSA:3.20.20.70	G3DSA:3.20.20.70																	PF01081	KDPG and KHG aldolase					SSF51569	SSF51569			#NAME?
	23428	GC_00001507	HL Core	GP2	5966	ECG	74546.PMT9312_0227	2-dehydro-3-deoxyphosphogluconate aldolase 4-hydroxy-2-oxoglutarate aldolase	G3DSA:3.20.20.70	G3DSA:3.20.20.70																	PF01081	KDPG and KHG aldolase					SSF51569	SSF51569			-------------MNNKEDSLSDFLKIESFFLLIKPEDNIYSNTSIRNLFFEELENLVKLGLKNIEISWSNNENWFDFVSDIKIKYPRINLGSASIVNKQSIEDSLKIGLNFSMMKFWDKDLFNYAQSKNYLLIPGINNLKDLKEAIDLNCNIIKIYPIKSKDSSINILNYKNVDFIAAGGLSINDLKTYKSLGYKAVVIGDKAIKNKKFDPKIYEWLTNN--
	23433	GC_00001507	HL Core	MED4	9480	ECG	74546.PMT9312_0227	2-dehydro-3-deoxyphosphogluconate aldolase 4-hydroxy-2-oxoglutarate aldolase	G3DSA:3.20.20.70	G3DSA:3.20.20.70																	PF01081	KDPG and KHG aldolase					SSF51569	SSF51569			#NAME?
	23426	GC_00001507	HL Core	MIT9107	12780	EAG	74546.PMT9312_0227	2-dehydro-3-deoxyphosphogluconate aldolase 4-hydroxy-2-oxoglutarate aldolase	G3DSA:3.20.20.70	G3DSA:3.20.20.70																	PF01081	KDPG and KHG aldolase					SSF51569	SSF51569			-------------MNNKEDSFSELLKNSSFFLLIKPEDKIYSNTSTRDSFFKELESLVKLGLNNIEISWSNNEKWLDFVSDIKIKYPKINLGSASIINKQSIEDSLKIGLDFSMMKFWDKDLFNYAKSKNFLLIPGIKNLKDLKEAINVNCNIIKIYPIKSKDNSIDILHYKNIDFIAAGGLSINDVKTYKALGYKSIIIGDKGIKNQKFDPKIFEWLKNN--
	23425	GC_00001507	HL Core	MIT9116	14777	ECG	74546.PMT9312_0227	2-dehydro-3-deoxyphosphogluconate aldolase 4-hydroxy-2-oxoglutarate aldolase	G3DSA:3.20.20.70	G3DSA:3.20.20.70																	PF01081	KDPG and KHG aldolase					SSF51569	SSF51569			-------------MNNKEDSFSELLKNSSFFLLIKPEDKIYSNTSTRDSFFKELESLVKLGLNNIEISWSNNEKWLDFVSDIKIKYPKINLGSASIINKQSIEDSLKIGLDFSMMKFWDKDLFNYAKSKNFLLIPGIKNLKDLKEAINVNCNIIKIYPIKSKDNSIDILHYKNIDFIAAGGLSINDVKTYKALGYKSIIIGDKGIKNQKFDPKIFEWLKNN--
	23429	GC_00001507	HL Core	MIT9123	15065	EAG	74546.PMT9312_0227	2-dehydro-3-deoxyphosphogluconate aldolase 4-hydroxy-2-oxoglutarate aldolase	G3DSA:3.20.20.70	G3DSA:3.20.20.70																	PF01081	KDPG and KHG aldolase					SSF51569	SSF51569			-------------MNNKEDSFSELLKNSSFFLLIKPEDKIYSNTSTRDSFFKELESLVKLGLNNIEISWSNNEKWLDFVSDIKIKYPKINLGSASIINKQSIEDSLKIGLDFSMMKFWDKDLFNYAKSKNFLLIPGIKNLKDLKEAINVNCNIIKIYPIKSKDNSIDILHYKNIDFIAAGGLSINDVKTYKALGYKSIIIGDKGIKNQKFDPKIFEWLKNN--
	23431	GC_00001507	HL Core	MIT9201	18573	ECG	74546.PMT9312_0227	2-dehydro-3-deoxyphosphogluconate aldolase 4-hydroxy-2-oxoglutarate aldolase	G3DSA:3.20.20.70	G3DSA:3.20.20.70																	PF01081	KDPG and KHG aldolase					SSF51569	SSF51569			-------------MNNKEDSFSEYLKIESFFLLIKPEENIYSNISLRNSFFEELENLVKLGLKNIEISWSNNENWFEFVSDIKIKYPRINLGSASIVNKQSIEDSLKIGLNFSMMKFWDKDLFNYAQSKNYLLIPGINNLKDLKEAIDLNCNIIKIYPIKSKDSSINILNYKNVDFIAAGGLSINDLKTYKSLGYKAVVIGDKGFINKKFDPKIYEWLKNN--
	23436	GC_00001507	HL Core	MIT9202	19873	ECG	93060.P9215_02471	2-dehydro-3-deoxyphosphogluconate aldolase 4-hydroxy-2-oxoglutarate aldolase	G3DSA:3.20.20.70	G3DSA:3.20.20.70																	PF01081	KDPG and KHG aldolase					SSF51569	SSF51569			-------------MNIKEGSFSDLLLKESFFLLIKPEDDIYSNTSIRNSFFEELGSLVKLGLKNIEISWSNNEKWLDFVYEIKLKFPRINLGSASIVNKQSIEDSLKIGLNFSMMKFWDKDLFNYSKSKNYLLIPGIKNLKDLEEAINLNCNIIKIYPIKSKASSIDILNFESIDFIAAGGLSINDVKTYKSLGYKAIVIGDKGIIKKKFDPKIYEWLKKNN-
	23438	GC_00001507	HL Core	MIT9215	22716	ECG	93060.P9215_02471	2-dehydro-3-deoxyphosphogluconate aldolase 4-hydroxy-2-oxoglutarate aldolase	G3DSA:3.20.20.70	G3DSA:3.20.20.70																	PF01081	KDPG and KHG aldolase					SSF51569	SSF51569			-------------MNIKEDSFSDLLLKESFFLLIKPEDNIYSNSSIRNSFFEELGSLVKLGLKNIEISWSNNEKWLDFVYEIKLKFPRINLGSASIVNKQSIEDSLKIGLNFSMMKFWDKDLFNYSKSKNYLLIPGIKNLKDLEEAINLNCNIIKIYPIKSKASSINILNFESIDFIAAGGLSINDVKTYKSLGYKAIVIGDKGIIKKQFDPKIYEWLKKNN-
	23437	GC_00001507	HL Core	MIT9301	24668	ECG	167546.P9301_02471	2-dehydro-3-deoxyphosphogluconate aldolase 4-hydroxy-2-oxoglutarate aldolase	G3DSA:3.20.20.70	G3DSA:3.20.20.70																	PF01081	KDPG and KHG aldolase					SSF51569	SSF51569			-------------MNIREDSFCYLSLKESFFLLIKPDDNIYSNTSIRNSFFEELESLVKLGLKNIEISWSNNKNWLDLLSDIKTKYPRVNLGSASIVNKQSIEDSLKIGLNFSMMKFWDKDLFNYAQSKNYLLIPGINNLKDLKDATNLNCNIIKIYPIKSKDNSIDILKYKNIDFIAAGGLSINDLKNYKSLGYKSVVIGDKAIKNKKFDPKIFEWLKNN--
	23435	GC_00001507	HL Core	MIT9302	28121	ECG	74546.PMT9312_0227	2-dehydro-3-deoxyphosphogluconate aldolase 4-hydroxy-2-oxoglutarate aldolase	G3DSA:3.20.20.70	G3DSA:3.20.20.70																	PF01081	KDPG and KHG aldolase					SSF51569	SSF51569			-------------MNIKEDSFSELLKKESFFLMIKPEKNIYSNTSIRNSFFEELETLVKLGLKNIEISWSNNEYWLDFVSDIKIKYPRINLGSASVVNKQSIKDSLKIGLNFSMMKFWDKDLLNYAKSKNYLLIPGIKNLKDLEEAINLKCNIIKIYPIKSKDSSINILNYKNIDFIAAGGLSINDLKTYKSLGYKAIVIGDKGIKNKKFDPKIREWLKNN--
	23441	GC_00001507	HL Core	MIT9311	31811	ECG	74546.PMT9312_0227	2-dehydro-3-deoxyphosphogluconate aldolase 4-hydroxy-2-oxoglutarate aldolase	G3DSA:3.20.20.70	G3DSA:3.20.20.70																	PF01081	KDPG and KHG aldolase					SSF51569	SSF51569			-------------MNNKEDSFSELLKKESFFLLIKPEDNIYSNTSIRNSFFDELESLVKVGLKNIEISWSNNENWLDFVSDIKVKYPRINLGSASVVNKQSIEDSLKIGLNFSMMKFWDKDLFNYAKSKNYLLIPGIKNLKDLEEAINLNCNIIKIYPIKSKDSSIDIIKYKNIDFIAAGGLSINDVKNYKSLGYKAIVIGDKGIKNKNFDPKIFEWLENS--
	23432	GC_00001507	HL Core	MIT9312	33096	ECG	74546.PMT9312_0227	2-dehydro-3-deoxyphosphogluconate aldolase 4-hydroxy-2-oxoglutarate aldolase	G3DSA:3.20.20.70	G3DSA:3.20.20.70																	PF01081	KDPG and KHG aldolase					SSF51569	SSF51569			-------------MNNKEDSFSELLKKESFFLLIKPEDNIYSNTSIRNSFFDELESLVKVGLKNIEISWSNNENWLDFVSDIKVKYPRINLGSASVVNKQSIEDSLKIGLNFSMMKFWDKDLFNYAKSKNYLLIPGIKNLKDLEEAINLNCNIIKIYPIKSKDSSIDIIKYKNIDFIAAGGLSINDVKNYKSLGYKAIVIGDKGIKNKNFDPKIFEWLENS--
	23424	GC_00001507	HL Core	MIT9314	38225	ECG	93060.P9215_02471	2-dehydro-3-deoxyphosphogluconate aldolase 4-hydroxy-2-oxoglutarate aldolase	G3DSA:3.20.20.70	G3DSA:3.20.20.70																	PF01081	KDPG and KHG aldolase					SSF51569	SSF51569			-------------MNIKEDSFSDMLLKESFFLLVKPEDNIYSNTSIRNSFFEELGSLVKLGLKNIEISWSNNEKWLDFVSEIKLNFPQINLGSASIVNKQSIEDSLKIGLNFSMMKFWDKDLFNYSKSKNFLLIPGIKNLKDLEEAINLNCNIIKIYPIKSKASSIDILNFESIDFIAAGGLSINDVKTYKSLGYKAIVIGDKGIIKKKFDPKIYEWLKNN--
	23430	GC_00001507	HL Core	MIT9321	39946	EAG	93060.P9215_02471	2-dehydro-3-deoxyphosphogluconate aldolase 4-hydroxy-2-oxoglutarate aldolase	G3DSA:3.20.20.70	G3DSA:3.20.20.70																	PF01081	KDPG and KHG aldolase					SSF51569	SSF51569			-------------MNIKKDSFSDLLLEESFFLLIKPEDNIYSNTSIRNSLFEELRSLVKLGLKNIEISWSNNEKWFDFVSEIKLNFPRINLGSASIVNKQSLEDSFKIGLNFSMMKFWDKDLFSYAQSKNYLLIPGIKNLNDLEEAINYNCNIIKIYPIRSKASSIDILNFENINFIAAGGLSINDVNTYKSLGYKAIVIGDKGIIKQKFDPKIYEWLRNN--
	23422	GC_00001507	HL Core	MIT9322	41710	EAG	93060.P9215_02471	2-dehydro-3-deoxyphosphogluconate aldolase 4-hydroxy-2-oxoglutarate aldolase	G3DSA:3.20.20.70	G3DSA:3.20.20.70																	PF01081	KDPG and KHG aldolase					SSF51569	SSF51569			-------------MNIKKDSFSDLLLEESFFLLIKPEDNIYSNTSIRNSLFEELRSLVKLGLKNIEISWSNNEKWFDFVSEIKLNFPRINLGSASIVNKQSLEDSFKIGLNFSMMKFWDKDLFSYAQSKNYLLIPGIKNLNDLEEAINYNCNIIKIYPIRSKASSIDILNFENINFIAAGGLSINDVNTYKSLGYKAIVIGDKGIIKQKFDPKIYEWLRNN--
	23440	GC_00001507	HL Core	MIT9401	43456	EAG	93060.P9215_02471	2-dehydro-3-deoxyphosphogluconate aldolase 4-hydroxy-2-oxoglutarate aldolase	G3DSA:3.20.20.70	G3DSA:3.20.20.70																	PF01081	KDPG and KHG aldolase					SSF51569	SSF51569			-------------MNIKKDSFSDLLLEESFFLLIKPEDNIYSNTSIRNSLFEELRSLVKLGLKNIEISWSNNEKWFDFVSEIKLNFPRINLGSASIVNKQSLEDSFKIGLNFSMMKFWDKDLFSYAQSKNYLLIPGIKNLNDLEEAINYNCNIIKIYPIRSKASSIDILNFENINFIAAGGLSINDVNTYKSLGYKAIVIGDKGIIKQKFDPKIYEWLRNN--
	23423	GC_00001507	HL Core	MIT9515	45157	EAG	74546.PMT9312_0227	2-dehydro-3-deoxyphosphogluconate aldolase 4-hydroxy-2-oxoglutarate aldolase	G3DSA:3.20.20.70	G3DSA:3.20.20.70																	PF01081	KDPG and KHG aldolase					SSF51569	SSF51569			MQTISDFKKSDNLIKHKKDFFSKNLESKSFFLLIKPTKNIYKNAEEKELVEKQLEKLIKIGFLNIEISWSDNEKWFDYVSNLKLKFPKLNLGSASIINKKSIDDSIRLGLNYSMMKVWDKDLLNYSRSKNHLLIPGIKNLKDLKEAIDLHCKIIKIYPVKDKNKLIKISQYKNIDFIAAGGLSIVDVPLYKSLGYKAIVIGDKGFKNKVIDPNIYEWIQKTSN
	23434	GC_00001507	HL Core	SB	53814	ECG	74546.PMT9312_0227	2-dehydro-3-deoxyphosphogluconate aldolase 4-hydroxy-2-oxoglutarate aldolase	G3DSA:3.20.20.70	G3DSA:3.20.20.70																	PF01081	KDPG and KHG aldolase					SSF51569	SSF51569			-------------MNNIEDSFSEHLKIESFFLLIKPEDNIYSNTSIRNSFFEELENLVKLGLKNIEISWSNNENWFDFVSNIKIKYPRINLGSASIVNKQSIEDSLKIGLNFSMMKFWDKDLFNYAQSKNYLLIPGINNLKDLKEAIDLNCNIIKIYPIKNKDSSINILNYKNVDFIAAGGLSINDLKSYKSLGYKAVVIGDKAIKNKKFDPKIYEWLKNN--
	45084	GC_00002455		CCMP1375	2117	NA	167539.Pro0254	2-dehydro-3-deoxyphosphogluconate aldolase 4-hydroxy-2-oxoglutarate aldolase	G3DSA:3.20.20.70	G3DSA:3.20.20.70							G	G			COG0800	2-keto-3-deoxy-6-phosphogluconate aldolase					PF01081	KDPG and KHG aldolase					SSF51569	SSF51569	PS00160	KDPG and KHG aldolases Schiff-base forming residue.	MLNIFKSSSSEIWQQKQDELIASLTYQPLLIVLRITEDDLDNLEIKSFLTLIKTLQSLGVRNIEIAWSSHKNWIKFIQEIKKEFKEISFGAASITNSNSLELITKLGFNYAMSPCWDIELQKRAKALGQALVPGVLSPSDIQQAKNFGYRIIKLFPASVIGINYLNQIKASINPLPFVIAAGGMSIININSWLEQGYGAIAVGRELIQKESVDPQLAEWLKATPNFSTN
	45081	GC_00002455		LG	8794	NA	167539.Pro0254	2-dehydro-3-deoxyphosphogluconate aldolase 4-hydroxy-2-oxoglutarate aldolase	G3DSA:3.20.20.70	G3DSA:3.20.20.70							G	G			COG0800	2-keto-3-deoxy-6-phosphogluconate aldolase					PF01081	KDPG and KHG aldolase					SSF51569	SSF51569	PS00160	KDPG and KHG aldolases Schiff-base forming residue.	MLNIFKSSSSEIWQQKQDELIASLTYQPLLIVLRITEDDLDNLEIKSFLTLIKTLQSLGVRNIEIAWSSHKNWIKFIQEIKKEFKEISFGAASITNSNSLELITKLGFNYAMSPCWDIELQKRAKALGQALVPGVLSPSDIQQAKNFGYRIIKLFPASVIGINYLNQIKASINPLPFVIAAGGMSIININSWLEQGYGAIAVGRELIQKESVDPQLAEWLKATPNFSTN
	45080	GC_00002455		SS2	56412	NA	167539.Pro0254	2-dehydro-3-deoxyphosphogluconate aldolase 4-hydroxy-2-oxoglutarate aldolase	G3DSA:3.20.20.70	G3DSA:3.20.20.70							G	G			COG0800	2-keto-3-deoxy-6-phosphogluconate aldolase					PF01081	KDPG and KHG aldolase					SSF51569	SSF51569	PS00160	KDPG and KHG aldolases Schiff-base forming residue.	MLNIFKSSSSEIWQQKQDELIASLTYQPLLIVLRITEDDLDNLEIKSFLTLIKTLQSLGVRNIEIAWSSHKNWIKFIQEIKKEFKEISFGAASITNSNSLELITKLGFNYAMSPCWDIELQKRAKALGQALVPGVLSPSDIQQAKNFGYRIIKLFPASVIGINYLNQIKASINPLPFVIAAGGMSIININSWLEQGYGAIAVGRELIQKESVDPQLAEWLKATPNFSTN
	45083	GC_00002455		SS35	58053	NA	167539.Pro0254	2-dehydro-3-deoxyphosphogluconate aldolase 4-hydroxy-2-oxoglutarate aldolase	G3DSA:3.20.20.70	G3DSA:3.20.20.70							G	G			COG0800	2-keto-3-deoxy-6-phosphogluconate aldolase					PF01081	KDPG and KHG aldolase					SSF51569	SSF51569	PS00160	KDPG and KHG aldolases Schiff-base forming residue.	MLNIFKSSSSEIWQQKQDELIASLTYQPLLIVLRITEDDLDNLEIKSFLTLIKTLQSLGVRNIEIAWSSHKNWIKFIQEIKKEFKEISFGAASITNSNSLELITKLGFNYAMSPCWDIELQKRAKALGQALVPGVLSPSDIQQAKNFGYRIIKLFPASVIGINYLNQIKASINPLPFVIAAGGMSIININSWLEQGYGAIAVGRELIQKESVDPQLAEWLKATPNFSTN
	45082	GC_00002455		SS51	59346	NA	167539.Pro0254	2-dehydro-3-deoxyphosphogluconate aldolase 4-hydroxy-2-oxoglutarate aldolase	G3DSA:3.20.20.70	G3DSA:3.20.20.70							G	G			COG0800	2-keto-3-deoxy-6-phosphogluconate aldolase					PF01081	KDPG and KHG aldolase					SSF51569	SSF51569	PS00160	KDPG and KHG aldolases Schiff-base forming residue.	MLNIFKSSSSEIWQQKQDELIASLTYQPLLIVLRITEDDLDNLEIKSFLTLIKTLQSLGVRNIEIAWSSHKNWIKFIQEIKKEFKEISFGAASITNSNSLELITKLGFNYAMSPCWDIELQKRAKALGQALVPGVLSPSDIQQAKNFGYRIIKLFPASVIGINYLNQIKASINPLPFVIAAGGMSIININSWLEQGYGAIAVGRELIQKESVDPQLAEWLKATPNFSTN
	47383	GC_00003891		NATL1A	47064	ECG	167539.Pro0254	2-dehydro-3-deoxyphosphogluconate aldolase 4-hydroxy-2-oxoglutarate aldolase	G3DSA:3.20.20.70	G3DSA:3.20.20.70							G	G			COG0800	2-keto-3-deoxy-6-phosphogluconate aldolase					PF01081	KDPG and KHG aldolase					SSF51569	SSF51569			MEAKQNNLIKSLRIQPLIVVIRLEHNFFNLSKKKENLLSKIEKLSNFGIKNIEIGWDSNPEWVNLILEIKKRFKSINIGVASISSRQSLESILSLDVNYSMSQFFNKEIHIQAIEYNQLVIPGISNIENFKEAIDLGYKIVKIFPASKLGINFINELKDFKKKDIFFIGAGGIKSKNLKKFLKSGYDALVIGRELRNQTPDKDLEIWLEDY
	47382	GC_00003891		NATL2A	49080	ECG	167539.Pro0254	2-dehydro-3-deoxyphosphogluconate aldolase 4-hydroxy-2-oxoglutarate aldolase	G3DSA:3.20.20.70	G3DSA:3.20.20.70							G	G			COG0800	2-keto-3-deoxy-6-phosphogluconate aldolase					PF01081	KDPG and KHG aldolase					SSF51569	SSF51569			MEAKQNYLKKTLRIQPLIVVIRLEHNFFNLSKKKENLLSKIEKLSNFGIKNIEIGWDSNPEWVNLILEIKKRFKSINIGVASISSRQSLESLLSLDVNYSMSQFFNKEIHIQAIEYNQLVIPGISNIENFKEAIDLGYKIVKIFPASKLGINFINELKDFKKKDIFFIGAGGIKSKHLKKFLQSGYDALVIGRELRNQTPDKDLEIWLKDY
	47381	GC_00003891		PAC1	51866	ECG	167539.Pro0254	2-dehydro-3-deoxyphosphogluconate aldolase 4-hydroxy-2-oxoglutarate aldolase	G3DSA:3.20.20.70	G3DSA:3.20.20.70							G	G			COG0800	2-keto-3-deoxy-6-phosphogluconate aldolase					PF01081	KDPG and KHG aldolase					SSF51569	SSF51569			MESQQNNLIKSLRIQPLIIVIRLEHNFFNLSKKKENLLSKIEKLSNFGIKNIEIGWDPNPEWVDLILEIKKRFKSINIGVASISSRQSLESILSLDVNYSMSQFFNKEIHIQAIEYNQLVIPGISNIENFKEAIDLGYKIVKIFPASKLGINFINELKDFKKKDIFFIGAGGIKSKNLKKFLKSGYDALVIGRELRNQTPDKDLKIWLKDY
	33233	GC_00005098		MIT9303	30377	ECG	74547.PMT1797	2-dehydro-3-deoxyphosphogluconate aldolase 4-hydroxy-2-oxoglutarate aldolase	G3DSA:3.20.20.70	G3DSA:3.20.20.70																											#NAME?
	33234	GC_00005098		MIT9313	36801	ECG	74547.PMT1797	2-dehydro-3-deoxyphosphogluconate aldolase 4-hydroxy-2-oxoglutarate aldolase	G3DSA:3.20.20.70	G3DSA:3.20.20.70							G	G			COG0800	2-keto-3-deoxy-6-phosphogluconate aldolase					PF01081	KDPG and KHG aldolase					SSF51569	SSF51569	PS00160	KDPG and KHG aldolases Schiff-base forming residue.	MPNTSERSGDCLWLDRQEILIASLRAQPLVVVLRSEHDDLEGSSSRASLFAVFEQLHLLGVRHVELAWSPHPGWMSLMKEVQKCFAGLCLGAASISCPEALQSVAELGLAYAMTSYWDPDLHQKAREMHQLLVPGVFTPTEIQQAYRCGCRLVKLFPASVLGVDYWRQLAGPMEALPFVIAAGGLTVQDFIPWLNAGYDAVALGRGLVQQGQLDPALQAYLKPPATTA
	8580	GC_00000243	HL+LL Core	AS9601	649	ECG	146891.A9601_06701	2-phosphosulfolactate phosphatase	G3DSA:3.90.1560.10	G3DSA:3.90.1560.10							H|R	H|R			COG2045	Phosphosulfolactate phosphohydrolase or related enzyme	MF_00490	2-phosphosulfolactate phosphatase [comB].			PF04029	2-phosphosulpholactate phosphatase					SSF142823	SSF142823			#NAME?
	8600	GC_00000243	HL+LL Core	CCMP1375	2873	NA	167539.Pro1046	2-phosphosulfolactate phosphatase	G3DSA:3.90.1560.10	G3DSA:3.90.1560.10							H|R	H|R			COG2045	Phosphosulfolactate phosphohydrolase or related enzyme	MF_00490	2-phosphosulfolactate phosphatase [comB].			PF04029	2-phosphosulpholactate phosphatase					SSF142823	SSF142823			MNDLVTLTQVVTDWSMELSYFHVAKDVPSGIKPETSVVIDVLRATTTIACALNNGAEAVQTFADLDNLKEQASCWPLSKRLLLGERGGKKIDGFDLGNSPLAVTSNVVKGKRLFMSTTNGTRSLERVKESKSLYTMSFINRKAVAEKLISNQSKSVLILGSGWEGAYSLEDSLAAGALASFLLNKNPNSVHILNDELSAAVALWSCWENNIEGCLRNATHGKRLERLGNHDDDFTCCSELDKICVVPTQREKGVLCSL
	8594	GC_00000243	HL+LL Core	EQPAC1	5167	ECG	59919.PMM0614	2-phosphosulfolactate phosphatase	G3DSA:3.90.1560.10	G3DSA:3.90.1560.10							H|R	H|R			COG2045	Phosphosulfolactate phosphohydrolase or related enzyme					PF04029	2-phosphosulpholactate phosphatase					SSF142823	SSF142823			#NAME?
	8581	GC_00000243	HL+LL Core	GP2	5692	ECG	146891.A9601_06701	2-phosphosulfolactate phosphatase	G3DSA:3.90.1560.10	G3DSA:3.90.1560.10							H|R	H|R			COG2045	Phosphosulfolactate phosphohydrolase or related enzyme					PF04029	2-phosphosulpholactate phosphatase					SSF142823	SSF142823			#NAME?
	8588	GC_00000243	HL+LL Core	LG	7754	NA	167539.Pro1046	2-phosphosulfolactate phosphatase	G3DSA:3.90.1560.10	G3DSA:3.90.1560.10							H|R	H|R			COG2045	Phosphosulfolactate phosphohydrolase or related enzyme	MF_00490	2-phosphosulfolactate phosphatase [comB].			PF04029	2-phosphosulpholactate phosphatase					SSF142823	SSF142823			MNDLVTLTQVVTDWSMELSYFHVAKDVPSGIKPETSVVIDVLRATTTIACALNNGAEAVQTFADLDNLKEQASCWPLSKRLLLGERGGKKIDGFDLGNSPLAVTSNVVKGKRLFMSTTNGTRSLERVKESKSLYTMSFINRKAVAEKLISNQSKSVLILGSGWEGAYSLEDSLAAGALASFLLNKNPNSVHILNDELSAAVALWSCWENNIEGCLRNATHGKRLERLGNHDDDFTCCSELDKICVVPTQREKGVLCSL
	8586	GC_00000243	HL+LL Core	MED4	9895	ECG	59919.PMM0614	2-phosphosulfolactate phosphatase	G3DSA:3.90.1560.10	G3DSA:3.90.1560.10							H|R	H|R			COG2045	Phosphosulfolactate phosphohydrolase or related enzyme					PF04029	2-phosphosulpholactate phosphatase					SSF142823	SSF142823			#NAME?
	8579	GC_00000243	HL+LL Core	MIT9107	11840	ECG	146891.A9601_06701	2-phosphosulfolactate phosphatase	G3DSA:3.90.1560.10	G3DSA:3.90.1560.10							H|R	H|R			COG2045	Phosphosulfolactate phosphohydrolase or related enzyme	MF_00490	2-phosphosulfolactate phosphatase [comB].			PF04029	2-phosphosulpholactate phosphatase					SSF142823	SSF142823			#NAME?
	8578	GC_00000243	HL+LL Core	MIT9116	13848	ECG	146891.A9601_06701	2-phosphosulfolactate phosphatase	G3DSA:3.90.1560.10	G3DSA:3.90.1560.10							H|R	H|R			COG2045	Phosphosulfolactate phosphohydrolase or related enzyme	MF_00490	2-phosphosulfolactate phosphatase [comB].			PF04029	2-phosphosulpholactate phosphatase					SSF142823	SSF142823			#NAME?
	8582	GC_00000243	HL+LL Core	MIT9123	16445	ECG	146891.A9601_06701	2-phosphosulfolactate phosphatase	G3DSA:3.90.1560.10	G3DSA:3.90.1560.10							H|R	H|R			COG2045	Phosphosulfolactate phosphohydrolase or related enzyme	MF_00490	2-phosphosulfolactate phosphatase [comB].			PF04029	2-phosphosulpholactate phosphatase					SSF142823	SSF142823			#NAME?
	8584	GC_00000243	HL+LL Core	MIT9201	18082	ECG	146891.A9601_06701	2-phosphosulfolactate phosphatase	G3DSA:3.90.1560.10	G3DSA:3.90.1560.10							H|R	H|R			COG2045	Phosphosulfolactate phosphohydrolase or related enzyme	MF_00490	2-phosphosulfolactate phosphatase [comB].			PF04029	2-phosphosulpholactate phosphatase					SSF142823	SSF142823			#NAME?
	8591	GC_00000243	HL+LL Core	MIT9202	20294	ECG	93060.P9215_06961	2-phosphosulfolactate phosphatase	G3DSA:3.90.1560.10	G3DSA:3.90.1560.10							H|R	H|R			COG2045	Phosphosulfolactate phosphohydrolase or related enzyme					PF04029	2-phosphosulpholactate phosphatase					SSF142823	SSF142823			#NAME?
	8596	GC_00000243	HL+LL Core	MIT9211	21712	NA	93059.P9211_10351	2-phosphosulfolactate phosphatase	G3DSA:3.90.1560.10	G3DSA:3.90.1560.10							H|R	H|R			COG2045	Phosphosulfolactate phosphohydrolase or related enzyme	MF_00490	2-phosphosulfolactate phosphatase [comB].			PF04029	2-phosphosulpholactate phosphatase					SSF142823	SSF142823			#NAME?
	8593	GC_00000243	HL+LL Core	MIT9215	23153	ECG	93060.P9215_06961	2-phosphosulfolactate phosphatase	G3DSA:3.90.1560.10	G3DSA:3.90.1560.10							H|R	H|R			COG2045	Phosphosulfolactate phosphohydrolase or related enzyme					PF04029	2-phosphosulpholactate phosphatase					SSF142823	SSF142823			#NAME?
	8592	GC_00000243	HL+LL Core	MIT9301	25045	ECG	167546.P9301_06401	2-phosphosulfolactate phosphatase	G3DSA:3.90.1560.10	G3DSA:3.90.1560.10							H|R	H|R			COG2045	Phosphosulfolactate phosphohydrolase or related enzyme					PF04029	2-phosphosulpholactate phosphatase					SSF142823	SSF142823			#NAME?
	8590	GC_00000243	HL+LL Core	MIT9302	27504	ECG	146891.A9601_06701	2-phosphosulfolactate phosphatase	G3DSA:3.90.1560.10	G3DSA:3.90.1560.10							H|R	H|R			COG2045	Phosphosulfolactate phosphohydrolase or related enzyme	MF_00490	2-phosphosulfolactate phosphatase [comB].			PF04029	2-phosphosulpholactate phosphatase					SSF142823	SSF142823			#NAME?
	8571	GC_00000243	HL+LL Core	MIT9303	29929	ECG	74547.PMT0396	2-phosphosulfolactate phosphatase	G3DSA:3.90.1560.10	G3DSA:3.90.1560.10							H|R	H|R			COG2045	Phosphosulfolactate phosphohydrolase or related enzyme	MF_00490	2-phosphosulfolactate phosphatase [comB].			PF04029	2-phosphosulpholactate phosphatase					SSF142823	SSF142823			#NAME?
	8599	GC_00000243	HL+LL Core	MIT9311	32772	ECG	74546.PMT9312_0614	2-phosphosulfolactate phosphatase	G3DSA:3.90.1560.10	G3DSA:3.90.1560.10							H|R	H|R			COG2045	Phosphosulfolactate phosphohydrolase or related enzyme					PF04029	2-phosphosulpholactate phosphatase					SSF142823	SSF142823			#NAME?
	8585	GC_00000243	HL+LL Core	MIT9312	33483	ECG	74546.PMT9312_0614	2-phosphosulfolactate phosphatase	G3DSA:3.90.1560.10	G3DSA:3.90.1560.10							H|R	H|R			COG2045	Phosphosulfolactate phosphohydrolase or related enzyme					PF04029	2-phosphosulpholactate phosphatase					SSF142823	SSF142823			#NAME?
	8577	GC_00000243	HL+LL Core	MIT9313	35209	ECG	74547.PMT0396	2-phosphosulfolactate phosphatase	G3DSA:3.90.1560.10	G3DSA:3.90.1560.10							H|R	H|R			COG2045	Phosphosulfolactate phosphohydrolase or related enzyme	MF_00490	2-phosphosulfolactate phosphatase [comB].			PF04029	2-phosphosulpholactate phosphatase					SSF142823	SSF142823			#NAME?
	8576	GC_00000243	HL+LL Core	MIT9314	37445	ECG	146891.A9601_06701	2-phosphosulfolactate phosphatase	G3DSA:3.90.1560.10	G3DSA:3.90.1560.10							H|R	H|R			COG2045	Phosphosulfolactate phosphohydrolase or related enzyme					PF04029	2-phosphosulpholactate phosphatase					SSF142823	SSF142823			#NAME?
	8583	GC_00000243	HL+LL Core	MIT9321	40306	ECG	146891.A9601_06701	2-phosphosulfolactate phosphatase	G3DSA:3.90.1560.10	G3DSA:3.90.1560.10							H|R	H|R			COG2045	Phosphosulfolactate phosphohydrolase or related enzyme	MF_00490	2-phosphosulfolactate phosphatase [comB].			PF04029	2-phosphosulpholactate phosphatase					SSF142823	SSF142823			#NAME?
	8574	GC_00000243	HL+LL Core	MIT9322	42743	ECG	146891.A9601_06701	2-phosphosulfolactate phosphatase	G3DSA:3.90.1560.10	G3DSA:3.90.1560.10							H|R	H|R			COG2045	Phosphosulfolactate phosphohydrolase or related enzyme	MF_00490	2-phosphosulfolactate phosphatase [comB].			PF04029	2-phosphosulpholactate phosphatase					SSF142823	SSF142823			#NAME?
	8595	GC_00000243	HL+LL Core	MIT9401	44605	ECG	146891.A9601_06701	2-phosphosulfolactate phosphatase	G3DSA:3.90.1560.10	G3DSA:3.90.1560.10							H|R	H|R			COG2045	Phosphosulfolactate phosphohydrolase or related enzyme	MF_00490	2-phosphosulfolactate phosphatase [comB].			PF04029	2-phosphosulpholactate phosphatase					SSF142823	SSF142823			#NAME?
	8575	GC_00000243	HL+LL Core	MIT9515	45574	ECG	167542.P9515_06791	2-phosphosulfolactate phosphatase	G3DSA:3.90.1560.10	G3DSA:3.90.1560.10							H|R	H|R			COG2045	Phosphosulfolactate phosphohydrolase or related enzyme					PF04029	2-phosphosulpholactate phosphatase					SSF142823	SSF142823			#NAME?
	8598	GC_00000243	HL+LL Core	NATL1A	47408	ECG	167555.NATL1_06721	2-phosphosulfolactate phosphatase	G3DSA:3.90.1560.10	G3DSA:3.90.1560.10							H|R	H|R			COG2045	Phosphosulfolactate phosphohydrolase or related enzyme	MF_00490	2-phosphosulfolactate phosphatase [comB].			PF04029	2-phosphosulpholactate phosphatase					SSF142823	SSF142823			#NAME?
	8573	GC_00000243	HL+LL Core	NATL2A	49427	ECG	167555.NATL1_06721	2-phosphosulfolactate phosphatase	G3DSA:3.90.1560.10	G3DSA:3.90.1560.10							H|R	H|R			COG2045	Phosphosulfolactate phosphohydrolase or related enzyme	MF_00490	2-phosphosulfolactate phosphatase [comB].			PF04029	2-phosphosulpholactate phosphatase					SSF142823	SSF142823			#NAME?
	8572	GC_00000243	HL+LL Core	PAC1	52424	ECG	167555.NATL1_06721	2-phosphosulfolactate phosphatase	G3DSA:3.90.1560.10	G3DSA:3.90.1560.10							H|R	H|R			COG2045	Phosphosulfolactate phosphohydrolase or related enzyme	MF_00490	2-phosphosulfolactate phosphatase [comB].			PF04029	2-phosphosulpholactate phosphatase					SSF142823	SSF142823			#NAME?
	8587	GC_00000243	HL+LL Core	SB	53414	ECG	146891.A9601_06701	2-phosphosulfolactate phosphatase	G3DSA:3.90.1560.10	G3DSA:3.90.1560.10							H|R	H|R			COG2045	Phosphosulfolactate phosphohydrolase or related enzyme					PF04029	2-phosphosulpholactate phosphatase					SSF142823	SSF142823			#NAME?
	8570	GC_00000243	HL+LL Core	SS2	56079	NA	167539.Pro1046	2-phosphosulfolactate phosphatase	G3DSA:3.90.1560.10	G3DSA:3.90.1560.10							H|R	H|R			COG2045	Phosphosulfolactate phosphohydrolase or related enzyme	MF_00490	2-phosphosulfolactate phosphatase [comB].			PF04029	2-phosphosulpholactate phosphatase					SSF142823	SSF142823			MNDLVTLTQVVTDWSMELSYFHVAKDVPSGIKPETSVVIDVLRATTTIACALNNGAEAVQTFADLDNLKEQASCWPLSKRLLLGERGGKKIDGFDLGNSPLAVTSNVVKGKRLFMSTTNGTRSLERVKESKSLYTMSFINRKAVAEKLISNQSKSVLILGSGWEGAYSLEDSLAAGALASFLLNKNPNSVHILNDELSAAVALWSCWENNIEGCLRNATHGKRLERLGNHDDDFTCCSELDKICVVPTQREKGVLCSL
	8597	GC_00000243	HL+LL Core	SS35	57508	NA	167539.Pro1046	2-phosphosulfolactate phosphatase	G3DSA:3.90.1560.10	G3DSA:3.90.1560.10							H|R	H|R			COG2045	Phosphosulfolactate phosphohydrolase or related enzyme	MF_00490	2-phosphosulfolactate phosphatase [comB].			PF04029	2-phosphosulpholactate phosphatase					SSF142823	SSF142823			MNDLVTLTQVVTDWSMELSYFHVAKDVPSGIKPETSVVIDVLRATTTIACALNNGAEAVQTFADLDNLKEQASCWPLSKRLLLGERGGKKIDGFDLGNSPLAVTSNVVKGKRLFMSTTNGTRSLERVKESKSLYTMSFINRKAVAEKLISNQSKSVLILGSGWEGAYSLEDSLAAGALASFLLNKNPNSVHILNDELSAAVALWSCWENNIEGCLRNATHGKRLERLGNHDDDFTCCSELDKICVVPTQREKGVLCSL
	8589	GC_00000243	HL+LL Core	SS51	59696	NA	167539.Pro1046	2-phosphosulfolactate phosphatase	G3DSA:3.90.1560.10	G3DSA:3.90.1560.10							H|R	H|R			COG2045	Phosphosulfolactate phosphohydrolase or related enzyme	MF_00490	2-phosphosulfolactate phosphatase [comB].			PF04029	2-phosphosulpholactate phosphatase					SSF142823	SSF142823			MNDLVTLTQVVTDWSMELSYFHVAKDVPSGIKPETSVVIDVLRATTTIACALNNGAEAVQTFADLDNLKEQASCWPLSKRLLLGERGGKKIDGFDLGNSPLAVTSNVVKGKRLFMSTTNGTRSLERVKESKSLYTMSFINRKAVAEKLISNQSKSVLILGSGWEGAYSLEDSLAAGALASFLLNKNPNSVHILNDELSAAVALWSCWENNIEGCLRNATHGKRLERLGNHDDDFTCCSELDKICVVPTQREKGVLCSL
	27343	GC_00001579		CCMP1375	3025	NA	167555.NATL1_19111	2OG-Fe(II) oxygenase																					PS51471	Fe(2+) 2-oxoglutarate dioxygenase domain profile.							#NAME?
	27338	GC_00001579		EQPAC1	4269	ECG	74546.PMT9312_1513	2OG-Fe(II) oxygenase																					PS51471	Fe(2+) 2-oxoglutarate dioxygenase domain profile.							#NAME?
	27335	GC_00001579		LG	7906	NA	167555.NATL1_19111	2OG-Fe(II) oxygenase																					PS51471	Fe(2+) 2-oxoglutarate dioxygenase domain profile.							#NAME?
	27334	GC_00001579		MED4	10798	ECG	74546.PMT9312_1513	2OG-Fe(II) oxygenase																					PS51471	Fe(2+) 2-oxoglutarate dioxygenase domain profile.							#NAME?
	27339	GC_00001579		MIT9211	21868	NA	167555.NATL1_19111	2OG-Fe(II) oxygenase																			PF13661	2OG-Fe(II) oxygenase superfamily	PS51471	Fe(2+) 2-oxoglutarate dioxygenase domain profile.							#NAME?
	27337	GC_00001579		MIT9302	27977	EAG	74546.PMT9312_1513	2OG-Fe(II) oxygenase																					PS51471	Fe(2+) 2-oxoglutarate dioxygenase domain profile.							MIDIRYKIGGIKPSFLMELIGRYKNSGFEAVADGVISFFDRRKDLHTNGIAFGQN-ISLNSDPYKVSTDISLVSIDRSDPEAFAISEVIIRGVNAGLKKYLEDRPLLKECCPEQSLFVNPIFNLQCYAPGEGFKKWHCDWTISNESTEPVHRVLAWILYCNDVTSGGTEFYWQNHHEKAERGKLIIFPAGISHIHRGRVNHTDFKTIATGWINAGNLETYISRLANS
	27328	GC_00001579		MIT9303	28715	ECG	74547.PMT1438	2OG-Fe(II) oxygenase																					PS51471	Fe(2+) 2-oxoglutarate dioxygenase domain profile.							#NAME?
	27342	GC_00001579		MIT9311	31432	ECG	74546.PMT9312_1513	2OG-Fe(II) oxygenase																					PS51471	Fe(2+) 2-oxoglutarate dioxygenase domain profile.							#NAME?
	27333	GC_00001579		MIT9312	34468	ECG	74546.PMT9312_1513	2OG-Fe(II) oxygenase																					PS51471	Fe(2+) 2-oxoglutarate dioxygenase domain profile.							#NAME?
	27332	GC_00001579		MIT9313	36400	ECG	74547.PMT1438	2OG-Fe(II) oxygenase																					PS51471	Fe(2+) 2-oxoglutarate dioxygenase domain profile.							#NAME?
	27331	GC_00001579		MIT9515	46453	ECG	167542.P9515_15781	2OG-Fe(II) oxygenase																					PS51471	Fe(2+) 2-oxoglutarate dioxygenase domain profile.							#NAME?
	27341	GC_00001579		NATL1A	48528	ECG	167555.NATL1_19111	2OG-Fe(II) oxygenase																					PS51471	Fe(2+) 2-oxoglutarate dioxygenase domain profile.							----------------MNLIASYRNKGFESVADGVMSFFDRRTDLHRNGIAFSNG-SNNDSDPAKISTDISLVAIDRSDPEAFALSEVIVRGVDAGLQKYLQDRPLFSKCSPEQSLFVNPIFNIQRYAPGEGFKKWHCDWTISEEATEPVHRVLAWILYCNDVESGGTEFHWQEYHETAERGKLVIFPAGLTHIHRGRVNKIHSKTIATGWINAGSRDSYISRLAS-
	27330	GC_00001579		NATL2A	50501	ECG	167555.NATL1_19111	2OG-Fe(II) oxygenase																					PS51471	Fe(2+) 2-oxoglutarate dioxygenase domain profile.							----------------MNLIASYRNKGFESVADGVMSFFDRRTDLHRNGIAFSNG-SNNDSDPAKISTDISLVAIDRTDPEAFALSEVIVRGVDAGLKKYLQDRPLFNECSPEQSLFVNPIFNIQRYAPGEGFKKWHCDWTISEEATEPVHRVLAWILYCNDVESGGTEFHWQEYHETAERGKLVIFPAGLTHIHRGRVNKIHSKTIATGWINAGSRDSYISRLAS-
	27329	GC_00001579		PAC1	51642	ECG	167555.NATL1_19111	2OG-Fe(II) oxygenase																					PS51471	Fe(2+) 2-oxoglutarate dioxygenase domain profile.							----------------MNLIASYRNKGFESVADGVMSFFDHRTDLHRNGIAFSNG-SNNDSDPAKISTDISLVAIDRTDPEAFALSEVIIRGVDAGLQKYLQDRPLFSKCSPEQSLFVNPIFNIQRYAPGEGFKKWHCDWTISEEATEPVHRVLAWILYCNDVESGGTEFHWQEYHETAERGKLVIFPAGLTHIHRGKVNKIHSKTIATGWINAGSRDSYISRLAS-
	27327	GC_00001579		SS2	56231	NA	167555.NATL1_19111	2OG-Fe(II) oxygenase																					PS51471	Fe(2+) 2-oxoglutarate dioxygenase domain profile.							#NAME?
	27340	GC_00001579		SS35	57356	NA	167555.NATL1_19111	2OG-Fe(II) oxygenase																					PS51471	Fe(2+) 2-oxoglutarate dioxygenase domain profile.							#NAME?
	27336	GC_00001579		SS51	59848	NA	167555.NATL1_19111	2OG-Fe(II) oxygenase																					PS51471	Fe(2+) 2-oxoglutarate dioxygenase domain profile.							#NAME?
	19038	GC_00004804		MIT9303	28399	ECG	74547.PMT0134	2og-fe(ii) oxygenase	G3DSA:2.60.120.330	G3DSA:2.60.120.330							Q	Q			COG3491	Isopenicillin N synthase and related dioxygenases					PF14226	non-haem dioxygenase in morphine synthesis N-terminal	PS51471	Fe(2+) 2-oxoglutarate dioxygenase domain profile.			SSF51197	SSF51197			MNQTILDVDLLAFEQGTKRQQAAVVDGLMRSLGTGFVVTTSDLPSAVLDEAYGMLSHFFALETTTKRQFNMPEAFGQTGYTDTLVETAAGEKLPDWKEMLNWSLHLPDNHPLRRRFPTLYPEQLLPEVAVPGITGVLQTFHQAIAELQCRVLRIIATGLGCHHDFFTDLIQDAPTLTRAIRYPPMSEAPAKGHMWAAAHGDINLITAMPRATAPGLQVYIDGSWVDAIAPEGQVIVNSGLMLERISNGLIPTGWHRVLAPSEWDCERLSVVQFCHPKPSTLLTPLSSCIDAKHPQRFAGVMAADALEEVLYQIKLMA
	19039	GC_00004804		MIT9313	34906	ECG	74547.PMT0134	2og-fe(ii) oxygenase	G3DSA:2.60.120.330	G3DSA:2.60.120.330							Q	Q			COG3491	Isopenicillin N synthase and related dioxygenases					PF14226	non-haem dioxygenase in morphine synthesis N-terminal	PS51471	Fe(2+) 2-oxoglutarate dioxygenase domain profile.			SSF51197	SSF51197			MKQTILDVDLLAFEQGTRFQQAAVVDGLMRSLGTGFVVTTSDLPSALLDEAYGMLNRFFALEATTKRQFNVPEAFGQTGYTDTLVETAAGEKLPDWKEMLNWAFPLPDNHPLRQRFPTLYPEQLLPEVAVPGITRVLQTFHQTIAELQCRVLRIIATGLGCHNDFFTDLVQDAPTLTRAIRYPPMSEAPAAGHMWAAAHGDINLITALPRATAPGLQVYIDGSWVDAIAPEGQVIVNSGLMLERISNGLIPTGWHRVLAPSQANLERLSVVQFCHPKPSTLLTPLSNCVNESHPQRFAGVMAADALEEVLYKIKLMA
	34257	GC_00006808	Singletons	MIT9301	25613	EAG	167546.P9301_12301	2og-fe(ii) oxygenase	G3DSA:2.60.120.620	G3DSA:2.60.120.620							R	R			COG3128	Predicted 2-oxoglutarate- and Fe(II)-dependent dioxygenase YbiX			SM00702	Prolyl 4-hydroxylase alpha subunit homologues.	PF13640	2OG-Fe(II) oxygenase superfamily	PS51471	Fe(2+) 2-oxoglutarate dioxygenase domain profile.			SSF51197	SSF51197			MKYGDRCRVIELKGDFLRKIDNTTSNMDLQIEKSLVNEGDPNIRISKQAWIKEASFCKLFFDIGQKVNELCKWNFDIKGIEPIQYGIYSDGGKYDWHVDQGAKMFLKGGSVRKISMTLFINNPDEYEGGEFDLELFPPEKEPRYETFKLKKGSAIFFQSDVWHRVRPVSSGVRKSLVAWYSGPPFR
	1003	GC_00006834	Singletons	NATL2A	50271	EAG	314607.KB13_260	2OG-Fe(II) oxygenase																	SM00702	Prolyl 4-hydroxylase alpha subunit homologues.	PF13640	2OG-Fe(II) oxygenase superfamily									MERLNTPISNLHPNFISSWIIKPLSLCDDLIEYFESNKANQKKGLTGSGLNTNKKDSFDIVIRPKEIILPRNEVFKKYFEKLFECHSDYISQWPFINNLCQKYEIGSFNLQRYTPGQHFKEIHTERTGIGTLHRVFVFMTYLNDVKEGGSTYFSHYDLEIEPRKGLTLIWPAEWTHAHRGNILKAGKKYIITGWINFPS
	28004	GC_00000755	HL+LL Core	AS9601	1736	ECG	146891.A9601_17921	3-5 exonuclease	G3DSA:3.30.420.10	G3DSA:3.30.420.10							J	J			COG0349	Ribonuclease D			SM00474	3'-5' exonuclease	PF01612	3'-5' exonuclease					SSF53098	SSF53098			#NAME?
	28024	GC_00000755	HL+LL Core	CCMP1375	3553	NA	93059.P9211_17051	3-5 exonuclease	G3DSA:3.30.420.10	G3DSA:3.30.420.10					Coil	Coil	J	J			COG0349	Ribonuclease D			SM00474	3'-5' exonuclease	PF01612	3'-5' exonuclease	PS51257	Prokaryotic membrane lipoprotein lipid attachment site profile.			SSF53098	SSF53098			#NAME?
	28018	GC_00000755	HL+LL Core	EQPAC1	4782	ECG	59919.PMM1584	3-5 exonuclease	G3DSA:3.30.420.10	G3DSA:3.30.420.10							J	J			COG0349	Ribonuclease D			SM00474	3'-5' exonuclease	PF01612	3'-5' exonuclease					SSF53098	SSF53098			#NAME?
	28005	GC_00000755	HL+LL Core	GP2	7245	ECG	167546.P9301_17761	3-5 exonuclease	G3DSA:3.30.420.10	G3DSA:3.30.420.10							J	J			COG0349	Ribonuclease D			SM00474	3'-5' exonuclease	PF01612	3'-5' exonuclease					SSF53098	SSF53098			#NAME?
	28012	GC_00000755	HL+LL Core	LG	8946	NA	93059.P9211_17051	3-5 exonuclease	G3DSA:3.30.420.10	G3DSA:3.30.420.10					Coil	Coil	J	J			COG0349	Ribonuclease D			SM00474	3'-5' exonuclease	PF01612	3'-5' exonuclease					SSF53098	SSF53098			MFLLKKSDLNFLCKRMSSFAKKPASFKVFETDLDDQWTQHFSTQSCLAIDTEAMGLIHGRDRLCLVQICDEQDNVACIKIQQHQTKANNLQSLMEDSAIEKVFHYARFDVAAISCNLNIAVNSIFCTKLASKIGRTYSPRHGLKEVILELVGIELDKQAQSSDWGRVGELTEKQLEYATNDVRYLIQARNQLEKMLIREDR---------WELTKRCFECISVMSELDIRRFHNIFEH
	28010	GC_00000755	HL+LL Core	MED4	11011	ECG	59919.PMM1584	3-5 exonuclease	G3DSA:3.30.420.10	G3DSA:3.30.420.10							J	J			COG0349	Ribonuclease D			SM00474	3'-5' exonuclease	PF01612	3'-5' exonuclease					SSF53098	SSF53098			#NAME?
	28003	GC_00000755	HL+LL Core	MIT9107	11694	ECG	167546.P9301_17761	3-5 exonuclease	G3DSA:3.30.420.10	G3DSA:3.30.420.10							J	J			COG0349	Ribonuclease D			SM00474	3'-5' exonuclease	PF01612	3'-5' exonuclease					SSF53098	SSF53098			#NAME?
	28002	GC_00000755	HL+LL Core	MIT9116	13919	ECG	167546.P9301_17761	3-5 exonuclease	G3DSA:3.30.420.10	G3DSA:3.30.420.10							J	J			COG0349	Ribonuclease D			SM00474	3'-5' exonuclease	PF01612	3'-5' exonuclease					SSF53098	SSF53098			#NAME?
	28006	GC_00000755	HL+LL Core	MIT9123	15977	ECG	167546.P9301_17761	3-5 exonuclease	G3DSA:3.30.420.10	G3DSA:3.30.420.10							J	J			COG0349	Ribonuclease D			SM00474	3'-5' exonuclease	PF01612	3'-5' exonuclease					SSF53098	SSF53098			#NAME?
	28008	GC_00000755	HL+LL Core	MIT9201	17644	ECG	167546.P9301_17761	3-5 exonuclease	G3DSA:3.30.420.10	G3DSA:3.30.420.10							J	J			COG0349	Ribonuclease D			SM00474	3'-5' exonuclease	PF01612	3'-5' exonuclease					SSF53098	SSF53098			#NAME?
	28015	GC_00000755	HL+LL Core	MIT9202	19489	ECG	93060.P9215_18571	3-5 exonuclease	G3DSA:3.30.420.10	G3DSA:3.30.420.10							J	J			COG0349	Ribonuclease D			SM00474	3'-5' exonuclease	PF01612	3'-5' exonuclease					SSF53098	SSF53098			#NAME?
	28020	GC_00000755	HL+LL Core	MIT9211	22334	NA	93059.P9211_17051	3-5 exonuclease	G3DSA:3.30.420.10	G3DSA:3.30.420.10							J	J			COG0349	Ribonuclease D			SM00474	3'-5' exonuclease	PF01612	3'-5' exonuclease					SSF53098	SSF53098			#NAME?
	28017	GC_00000755	HL+LL Core	MIT9215	24294	ECG	93060.P9215_18571	3-5 exonuclease	G3DSA:3.30.420.10	G3DSA:3.30.420.10							J	J			COG0349	Ribonuclease D			SM00474	3'-5' exonuclease	PF01612	3'-5' exonuclease					SSF53098	SSF53098			#NAME?
	28016	GC_00000755	HL+LL Core	MIT9301	26142	ECG	167546.P9301_17761	3-5 exonuclease	G3DSA:3.30.420.10	G3DSA:3.30.420.10							J	J			COG0349	Ribonuclease D			SM00474	3'-5' exonuclease	PF01612	3'-5' exonuclease					SSF53098	SSF53098			#NAME?
	28014	GC_00000755	HL+LL Core	MIT9302	26901	ECG	167546.P9301_17761	3-5 exonuclease	G3DSA:3.30.420.10	G3DSA:3.30.420.10							J	J			COG0349	Ribonuclease D			SM00474	3'-5' exonuclease	PF01612	3'-5' exonuclease					SSF53098	SSF53098			#NAME?
	27995	GC_00000755	HL+LL Core	MIT9303	30270	ECG	74547.PMT1703	3-5 exonuclease	G3DSA:3.30.420.10	G3DSA:3.30.420.10							J	J			COG0349	Ribonuclease D			SM00474	3'-5' exonuclease	PF01612	3'-5' exonuclease					SSF53098	SSF53098			---------------MADFSKAPASFVVFDGDLDSDWANRYLRASAIAVDTEAMGLIHGRDRLCLVQICDPADNVACVRIGLGQTSAPRLQKLMEATSVEKVFHFARFDVAALASGLGISVLPIFCTKVASRLARTYSPRHGLKEVVMELVGVELDKQAQSSDWGRVEELSDVQLAYAANDARYLLPARQRLEMMLRREGALGDCSALFQLHSCHRGTGSFAIYPDL-----------
	28023	GC_00000755	HL+LL Core	MIT9311	31022	ECG	74546.PMT9312_1676	3-5 exonuclease	G3DSA:3.30.420.10	G3DSA:3.30.420.10							J	J			COG0349	Ribonuclease D			SM00474	3'-5' exonuclease	PF01612	3'-5' exonuclease					SSF53098	SSF53098			#NAME?
	28009	GC_00000755	HL+LL Core	MIT9312	34633	ECG	74546.PMT9312_1676	3-5 exonuclease	G3DSA:3.30.420.10	G3DSA:3.30.420.10							J	J			COG0349	Ribonuclease D			SM00474	3'-5' exonuclease	PF01612	3'-5' exonuclease					SSF53098	SSF53098			#NAME?
	28001	GC_00000755	HL+LL Core	MIT9313	36705	ECG	74547.PMT1703	3-5 exonuclease	G3DSA:3.30.420.10	G3DSA:3.30.420.10							J	J			COG0349	Ribonuclease D			SM00474	3'-5' exonuclease	PF01612	3'-5' exonuclease					SSF53098	SSF53098			#NAME?
	28000	GC_00000755	HL+LL Core	MIT9314	38637	ECG	167546.P9301_17761	3-5 exonuclease	G3DSA:3.30.420.10	G3DSA:3.30.420.10							J	J			COG0349	Ribonuclease D			SM00474	3'-5' exonuclease	PF01612	3'-5' exonuclease					SSF53098	SSF53098			#NAME?
	28007	GC_00000755	HL+LL Core	MIT9321	40524	ECG	167546.P9301_17761	3-5 exonuclease	G3DSA:3.30.420.10	G3DSA:3.30.420.10							J	J			COG0349	Ribonuclease D			SM00474	3'-5' exonuclease	PF01612	3'-5' exonuclease					SSF53098	SSF53098			#NAME?
	27998	GC_00000755	HL+LL Core	MIT9322	41363	ECG	167546.P9301_17761	3-5 exonuclease	G3DSA:3.30.420.10	G3DSA:3.30.420.10							J	J			COG0349	Ribonuclease D			SM00474	3'-5' exonuclease	PF01612	3'-5' exonuclease					SSF53098	SSF53098			#NAME?
	28019	GC_00000755	HL+LL Core	MIT9401	44024	ECG	167546.P9301_17761	3-5 exonuclease	G3DSA:3.30.420.10	G3DSA:3.30.420.10							J	J			COG0349	Ribonuclease D			SM00474	3'-5' exonuclease	PF01612	3'-5' exonuclease					SSF53098	SSF53098			#NAME?
	27999	GC_00000755	HL+LL Core	MIT9515	46640	ECG	167542.P9515_17711	3-5 exonuclease	G3DSA:3.30.420.10	G3DSA:3.30.420.10							J	J			COG0349	Ribonuclease D			SM00474	3'-5' exonuclease	PF01612	3'-5' exonuclease					SSF53098	SSF53098			#NAME?
	28022	GC_00000755	HL+LL Core	NATL1A	48642	ECG	93059.P9211_17051	3-5 exonuclease	G3DSA:3.30.420.10	G3DSA:3.30.420.10							J	J			COG0349	Ribonuclease D			SM00474	3'-5' exonuclease	PF01612	3'-5' exonuclease					SSF53098	SSF53098			#NAME?
	27997	GC_00000755	HL+LL Core	NATL2A	50623	ECG	93059.P9211_17051	3-5 exonuclease	G3DSA:3.30.420.10	G3DSA:3.30.420.10							J	J			COG0349	Ribonuclease D			SM00474	3'-5' exonuclease	PF01612	3'-5' exonuclease					SSF53098	SSF53098			#NAME?
	27996	GC_00000755	HL+LL Core	PAC1	51037	ECG	93059.P9211_17051	3-5 exonuclease	G3DSA:3.30.420.10	G3DSA:3.30.420.10							J	J			COG0349	Ribonuclease D			SM00474	3'-5' exonuclease	PF01612	3'-5' exonuclease					SSF53098	SSF53098			#NAME?
	28011	GC_00000755	HL+LL Core	SB	54184	ECG	167546.P9301_17761	3-5 exonuclease	G3DSA:3.30.420.10	G3DSA:3.30.420.10							J	J			COG0349	Ribonuclease D			SM00474	3'-5' exonuclease	PF01612	3'-5' exonuclease					SSF53098	SSF53098			#NAME?
	27994	GC_00000755	HL+LL Core	SS2	55468	NA	93059.P9211_17051	3-5 exonuclease	G3DSA:3.30.420.10	G3DSA:3.30.420.10					Coil	Coil	J	J			COG0349	Ribonuclease D			SM00474	3'-5' exonuclease	PF01612	3'-5' exonuclease					SSF53098	SSF53098			MFLLKKSDLNFLCKRMSSFAKKPASFKVFETDLDDQWTQHFSTQSCLAIDTEAMGLIHGRDRLCLVQICDEQDNVACIKIQQHQTKANNLQSLMEDSAIEKVFHYARFDVAAISCNLNIAVNSIFCTKLASKIGRTYSPRHGLKEVILELVGIELDKQAQSSDWGRVGELTEKQLEYATNDVRYLIQARNQLEKMLIREDR---------WELTKRCFECISVMSELDIRRFHNIFEH
	28021	GC_00000755	HL+LL Core	SS35	57056	NA	93059.P9211_17051	3-5 exonuclease	G3DSA:3.30.420.10	G3DSA:3.30.420.10					Coil	Coil	J	J			COG0349	Ribonuclease D			SM00474	3'-5' exonuclease	PF01612	3'-5' exonuclease	PS51257	Prokaryotic membrane lipoprotein lipid attachment site profile.			SSF53098	SSF53098			#NAME?
	28013	GC_00000755	HL+LL Core	SS51	60086	NA	93059.P9211_17051	3-5 exonuclease	G3DSA:3.30.420.10	G3DSA:3.30.420.10					Coil	Coil	J	J			COG0349	Ribonuclease D			SM00474	3'-5' exonuclease	PF01612	3'-5' exonuclease					SSF53098	SSF53098			MFLLKKSDLNFLCKRMSSFAKKPASFKVFETDLDDQWTQHFSTQSCLAIDTEAMGLIHGRDRLCLVQICDEQDNVACIKIQQHQTKANNLQSLMEDSAIEKVFHYARFDVAAISCNLNIAVNSIFCTKLASKIGRTYSPRHGLKEVILELVGIELDKQAQSSDWGRVGELTEKQLEYATNDVRYLIQARNQLEKMLIREDR---------WELTKRCFECISVMSELDIRRFHNIFEH
	1729	GC_00000509	HL+LL Core	AS9601	716	ECG	146891.A9601_07371	3-dehydroquinate synthase	G3DSA:3.40.50.1970	G3DSA:3.40.50.1970			TIGR01357	aroB: 3-dehydroquinate synthase			E	E	PIRSF001455	PIRSF001455	COG0337	3-dehydroquinate synthetase	MF_00110	3-dehydroquinate synthase [aroB].			PF01761	3-dehydroquinate synthase					SSF56796	SSF56796			----MNK--RKILVPLGDKSYEVTLEAGILNNISEELLKIGITKKRKILVISNEEISNLYGEKFLNNLKDNKFQAKMFLIKAGESYKNLKTLSEIYDVAFEFGLDRNSIIIALGGGIVGDVSGFAAATWLRGIEYIQIPTTLLSMVDSSVGGKTGVNHPKGKNLIGAFNQPKAVFIDPETLKSLPKREFSAGMAEVIKYGVIRDKELFEYLEIEKNKNELINLKNEYLIKIINSSIKTKSNVVSQDEHENGVRAILNYGHSFGHVIENLCGYGKFLHGEAISIGMNIAGKIAIEKGLWSKEELERQRILLESYDLPTEIPKINKEDVLTILMGDKKVRDGKMRFILPKEIGAVDIYDDVEDSLFLKFFS-----
	1749	GC_00000509	HL+LL Core	CCMP1375	2836	NA	167539.Pro1009	3-dehydroquinate synthase	G3DSA:3.40.50.1970	G3DSA:3.40.50.1970			TIGR01357	aroB: 3-dehydroquinate synthase			E	E	PIRSF001455	PIRSF001455	COG0337	3-dehydroquinate synthetase	MF_00110	3-dehydroquinate synthase [aroB].			PF01761	3-dehydroquinate synthase					SSF56796	SSF56796			----MNQDNCRIKVNLKNNPYEVVVGSEILYTIGEELLRINIRTGEKILIVTNPDVSKPYSRRFITSLKEAGYDANLLILEAGENKKNYESIALIHNAAYEHQLDRGSLIIALGGGVIGDMAGFAAATWLRGIDFVQVPTTLLAMVDASVGGKTGVNHPKGKNLIGAFHQPKLVLIDINTLKTLPQREFRSGMAEIIKYGVIKDLELFNKLENEEDLSNIYSIKECVLLELIKISVSIKARIVEKDEKESGLRAILNYGHTFGHVIETLCGYGHWLHGEAVSMGMVLIGQLALRKNLWNVDDALRQEKLLTKAGLPISWPKINNEDVLRTLKGDKKVDKGNIRLIVPLGIGMVEILNDVSENEIKSLLESI---
	1743	GC_00000509	HL+LL Core	EQPAC1	5091	ECG	59919.PMM0682	3-dehydroquinate synthase	G3DSA:3.40.50.1970	G3DSA:3.40.50.1970			TIGR01357	aroB: 3-dehydroquinate synthase			E	E	PIRSF001455	PIRSF001455	COG0337	3-dehydroquinate synthetase	MF_00110	3-dehydroquinate synthase [aroB].			PF01761	3-dehydroquinate synthase					SSF56796	SSF56796			----MHK--NKILVPLSNNSYEVIIKQGLINNIGEELIRIGINSNRKILIVSNKEISTLFGRKLLNNLKKNNFNAEIFNIKAGESHKNFASLSEIFNAAFEVGLDRNSLLIALGGGIVGDVTGFAAATWLRGIEYIQIPTTLLSMVDSSVGGKTAVNHPKGKNLIGAFYQPKAVFIDPETLITLPTREFKAGMAEVIKYGVIKDKSLFEYLENEKNRDKILNLENESLIKIINKSIKTKACIVSEDEKENGIRAILNYGHSFGHVIENLCGYGEYLHGEAISIGMKIAGDIATEKNLWSKEHSLRQDHLIESYGLPIQTPKIKKNDVMKILMGDKKVRNGKMRFILPIELGEVDIFNDINESQFLKYFN-----
	1730	GC_00000509	HL+LL Core	GP2	6246	ECG	146891.A9601_07371	3-dehydroquinate synthase	G3DSA:3.40.50.1970	G3DSA:3.40.50.1970			TIGR01357	aroB: 3-dehydroquinate synthase			E	E	PIRSF001455	PIRSF001455	COG0337	3-dehydroquinate synthetase	MF_00110	3-dehydroquinate synthase [aroB].			PF01761	3-dehydroquinate synthase					SSF56796	SSF56796			----MNE--RKILVPLGDKSYEVTLEAGILNNISEELLKIGITKTRKILVISNKEISNLYGEKFLNNLKDNKFQAKMFLIKAGESYKNLKTLSEIYDVAFEFGLDRNSIIIALGGGIVGDVSGFAAATWLRGIEYIQIPTTLLSMVDSSVGGKTGVNHPKGKNLIGAFNQPKAVFIDPETLKSLPKREFSAGMAEVIKYGVIKDKELFEYLEIEKNKNELINLKNEYLIKIINSSIKTKSHVVSQDEHENGVRAILNYGHSFGHVIENLCGYGKFLHGEAISIGMNIAGKIAIEKGLWSKEELERQRILLESYNLPTEIPKINKEDVLTILMGDKKVRDGKMRFILPKEIGAVDIYDDVDDSLFLKFFS-----
	1737	GC_00000509	HL+LL Core	LG	7717	NA	167539.Pro1009	3-dehydroquinate synthase	G3DSA:3.40.50.1970	G3DSA:3.40.50.1970			TIGR01357	aroB: 3-dehydroquinate synthase			E	E	PIRSF001455	PIRSF001455	COG0337	3-dehydroquinate synthetase	MF_00110	3-dehydroquinate synthase [aroB].			PF01761	3-dehydroquinate synthase					SSF56796	SSF56796			----MNQDNCRIKVNLKNNPYEVVVGSEILYTIGEELLRINIRTGEKILIVTNPDVSKPYSRRFITSLKEAGYDANLLILEAGENKKNYESIALIHNAAYEHQLDRGSLIIALGGGVIGDMAGFAAATWLRGIDFVQVPTTLLAMVDASVGGKTGVNHPKGKNLIGAFHQPKLVLIDINTLKTLPQREFRSGMAEIIKYGVIKDLELFNKLENEEDLSNIYSIKECVLLELIKISVSIKARIVEKDEKESGLRAILNYGHTFGHVIETLCGYGHWLHGEAVSMGMVLIGQLALRKNLWNVDDALRQEKLLTKAGLPISWPKINNEDVLRTLKGDKKVDKGNIRLIVPLGIGMVEILNDVSENEIKSLLESI---
	1735	GC_00000509	HL+LL Core	MED4	9971	ECG	59919.PMM0682	3-dehydroquinate synthase	G3DSA:3.40.50.1970	G3DSA:3.40.50.1970			TIGR01357	aroB: 3-dehydroquinate synthase			E	E	PIRSF001455	PIRSF001455	COG0337	3-dehydroquinate synthetase	MF_00110	3-dehydroquinate synthase [aroB].			PF01761	3-dehydroquinate synthase					SSF56796	SSF56796			----MHK--NKILVPLSNNSYEVIIKQGLINNIGEELIRIGINSNRKILIVSNKEISTLFGRKLLNNLKKNNFNAEIFNIKAGESHKNFASLSEIFNAAFEVGLDRNSLLIALGGGIVGDVTGFAAATWLRGIEYIQIPTTLLSMVDSSVGGKTAVNHPKGKNLIGAFYQPKAVFIDPETLITLPTREFKAGMAEVIKYGVIKDKSLFEYLENEKNRDKILNLENESLIKIINKSIKTKACIVSEDEKENGIRAILNYGHSFGHVIENLCGYGEYLHGEAISIGMKIAGDIATEKNLWSKEHSLRQDHLIESYGLPIQTPKIKKNDVMKILMGDKKVRNGKMRFILPIELGEVDIFNDINESQFLKYFN-----
	1728	GC_00000509	HL+LL Core	MIT9107	12638	ECG	167546.P9301_07351	3-dehydroquinate synthase	G3DSA:3.40.50.1970	G3DSA:3.40.50.1970			TIGR01357	aroB: 3-dehydroquinate synthase			E	E	PIRSF001455	PIRSF001455	COG0337	3-dehydroquinate synthetase	MF_00110	3-dehydroquinate synthase [aroB].			PF01761	3-dehydroquinate synthase					SSF56796	SSF56796			----MNK--RKILVPLGKKSYEVTLEAGLLNNICEELLKIGITKNRKILVISNEEISNLYGEKFLNHLKDNNFKAQIFIIKAGESHKNLKTLSEIYDVAFEFGLDRNSIIIALGGGIVGDVSGFAAATWLRGIEYIQIPTTLLSMVDSSVGGKTGVNHPKGKNLIGAFNQPKAVFIDPETLKSLPKREFSAGMAEVIKYGVIRDKELFEYLEIEKNKNELINLKNEYLIKIINSSIETKSHIVSQDEHENGIRAILNYGHSFGHVIENLCGYGKFLHGEAISIGMNIAGKIAIEKGLWSKEELKRQENLLNSYDLPTEIPKINKEEVLTILMGDKKVRDGKMRFILPKEIGEVDIYDDVEDSLFLEFFS-----
	1727	GC_00000509	HL+LL Core	MIT9116	13662	ECG	167546.P9301_07351	3-dehydroquinate synthase	G3DSA:3.40.50.1970	G3DSA:3.40.50.1970			TIGR01357	aroB: 3-dehydroquinate synthase			E	E	PIRSF001455	PIRSF001455	COG0337	3-dehydroquinate synthetase	MF_00110	3-dehydroquinate synthase [aroB].			PF01761	3-dehydroquinate synthase					SSF56796	SSF56796			----MNK--RKILVPLGKKSYEVTLEAGLLNNICEELLKIGITKNRKILVISNEEISNLYGEKFLNHLKDNNFKAQIFIIKAGESHKNLKTLSEIYDVAFEFGLDRNSIIIALGGGIVGDVSGFAAATWLRGIEYIQIPTTLLSMVDSSVGGKTGVNHPKGKNLIGAFNQPKAVFIDPETLKSLPKREFSAGMAEVIKYGVIRDKELFEYLEIEKNKNELINLKNEYLIKIINSSIETKSHIVSQDEHENGIRAILNYGHSFGHVIENLCGYGKFLHGEAISIGMNIAGKIAIEKGLWSKEELKRQENLLNSYDLPTEIPKINKEEVLTILMGDKKVRDGKMRFILPKEIGEVDIYDDVEDSLFLEFFS-----
	1731	GC_00000509	HL+LL Core	MIT9123	16568	ECG	167546.P9301_07351	3-dehydroquinate synthase	G3DSA:3.40.50.1970	G3DSA:3.40.50.1970			TIGR01357	aroB: 3-dehydroquinate synthase			E	E	PIRSF001455	PIRSF001455	COG0337	3-dehydroquinate synthetase	MF_00110	3-dehydroquinate synthase [aroB].			PF01761	3-dehydroquinate synthase					SSF56796	SSF56796			----MNK--RKILVPLGKKSYEVTLEAGLLNNICEELLKIGITKNRKILVISNEEISNLYGEKFLNHLKDNNFKAQIFIIKAGESHKNLKTLSEIYDVAFEFGLDRNSIIIALGGGIVGDVSGFAAATWLRGIEYIQIPTTLLSMVDSSVGGKTGVNHPKGKNLIGAFNQPKAVFIDPETLKSLPKREFSAGMAEVIKYGVIRDKELFEYLEIEKNKNELINLKNEYLIKIINSSIETKSHIVSQDEHENGIRAILNYGHSFGHVIENLCGYGKFLHGEAISIGMNIAGKIAIEKGLWSKEELKRQENLLNSYDLPTEIPKINKEEVLTILMGDKKVRDGKMRFILPKEIGEVDIYDDVEDSLFLEFFS-----
	1733	GC_00000509	HL+LL Core	MIT9201	17914	ECG	167546.P9301_07351	3-dehydroquinate synthase	G3DSA:3.40.50.1970	G3DSA:3.40.50.1970			TIGR01357	aroB: 3-dehydroquinate synthase			E	E	PIRSF001455	PIRSF001455	COG0337	3-dehydroquinate synthetase	MF_00110	3-dehydroquinate synthase [aroB].			PF01761	3-dehydroquinate synthase					SSF56796	SSF56796			----MNK--RKILVPLGDKSYEVTLNAGILNNISEELLKIGITKNRKILVISNEEISNLYGEKFLNNLKVNKYQAQMFLIKAGESYKNLKTLSEIYDFAFEFGLDRNSIIIALGGGIVGDVSGFAAATWLRGIEYIQIPTTLLSMVDSSVGGKTGVNHPKGKNLIGAFNQPKAVFIDPETLKSLPKREFNAGMAEVIKYGVIKDKELFEYLEIEKNKNELINLKNEYLINIIESSIKTKSHIVSQDEHENGVRAILNYGHSFGHVIENLCGYGKFLHGEAISIGMNIAGGIAIEKGLWTKEELKRQKNLLESYNLPTEIPKINKGDVLTILMGDKKVRDGKMRFILPKEIGAVDIYDDVEDSLFLKFFY-----
	1740	GC_00000509	HL+LL Core	MIT9202	20380	ECG	146891.A9601_07371	3-dehydroquinate synthase	G3DSA:3.40.50.1970	G3DSA:3.40.50.1970			TIGR01357	aroB: 3-dehydroquinate synthase			E	E	PIRSF001455	PIRSF001455	COG0337	3-dehydroquinate synthetase	MF_00110	3-dehydroquinate synthase [aroB].			PF01761	3-dehydroquinate synthase					SSF56796	SSF56796			----MNK--RKILVPLGDKSYEVTLEAGILNNISEELLKIGITKKRKILVISNEEISNLYGEKFLNNLKDNKFQAKMFLIKAGESYKNLKTLSEIYDVAFEFGLDRNSIIIALGGGIVGDVSGFAAATWLRGIEYIQIPTTLLSMVDSSVGGKTGVNHPKGKNLIGAFNQPKAVFIDPETLKSLPKREFSAGMAEVIKYGVIRDKELFEYLEIEKNKNELINLKNEYLIKIINSSIKTKSHVVSQDEHENGLRAILNYGHSFGHVIENLCGYGKFLHGEAISIGMNIAGKIAIEKGLWSKEELERQRILLESYDLPTKIPKINKEDVLTILMGDKKVRDGKMRFILPKEIGAVDIYDDVEDSLFLKFFS-----
	1745	GC_00000509	HL+LL Core	MIT9211	21481	NA	93059.P9211_07971	3-dehydroquinate synthase	G3DSA:3.40.50.1970	G3DSA:3.40.50.1970			TIGR01357	aroB: 3-dehydroquinate synthase			E	E	PIRSF001455	PIRSF001455	COG0337	3-dehydroquinate synthetase	MF_00110	3-dehydroquinate synthase [aroB].			PF01761	3-dehydroquinate synthase					SSF56796	SSF56796			----MNQNSIRIKIKLAHNPYEVVIKKNGLARIGEELKKIGFKKATKVLVVTNKDVSVHYGKEFIHNLSDNGFNPTLIEIKAGEERKNLATISDIHNAAYTSRLERGSLMIALGGGVIGDMTGFAAATWLRGVSFVQVPTTLLAMVDASVGGKTGVNHPKGKNLIGAFHQPKLVLIDPITLKTLPEREFKAGMAEVIKYGVISDKKLFRKLEDAPRLDKLETLTDRFLLEIIQRSVQTKAHIVELDEREGGIRAVLNYGHTFGHAIEALCGYGTWLHGEAVSMGMIAIGQLALERNIWNISDLERQRKVLCQAGLPTIWPRVCAEDVIEILKSDKKVKDGEINFIVPTEIGKVEIIKNFTVNEIKQALQKLASK
	1742	GC_00000509	HL+LL Core	MIT9215	23224	ECG	93060.P9215_07671	3-dehydroquinate synthase	G3DSA:3.40.50.1970	G3DSA:3.40.50.1970			TIGR01357	aroB: 3-dehydroquinate synthase			E	E	PIRSF001455	PIRSF001455	COG0337	3-dehydroquinate synthetase	MF_00110	3-dehydroquinate synthase [aroB].			PF01761	3-dehydroquinate synthase					SSF56796	SSF56796			----MNK--RKILVPLGEKSYEVTLEAGILNNISEELLKIGITKKRKILVISNEEISNLYGKKFLNNLKDNKFQAKMFLIKAGESYKNLKTLSEIYDVAFEFGLDRNSIIIALGGGIVGDVSGFAAATWLRGIEYIQIPTTLLSMVDSSVGGKTGVNHPKGKNLIGAFNQPKAVFIDPETLKSLPKREFSAGMAEVIKYGVIRDKELFEYLEIDKNKNELINLKNEYLIKIINSSIKTKSHVVSQDEHENGVRAILNYGHSFGHVIENLCGYGKFLHGEAISIGMNIAGKIAIEKGLWSKEELERQRVLLESYDLPTEIPKINKEDVLTILMGDKKVRDGKMRFILPKEIGAVDIYDDVEDSLFLKFFS-----
	1741	GC_00000509	HL+LL Core	MIT9301	25138	ECG	167546.P9301_07351	3-dehydroquinate synthase	G3DSA:3.40.50.1970	G3DSA:3.40.50.1970			TIGR01357	aroB: 3-dehydroquinate synthase			E	E	PIRSF001455	PIRSF001455	COG0337	3-dehydroquinate synthetase	MF_00110	3-dehydroquinate synthase [aroB].			PF01761	3-dehydroquinate synthase					SSF56796	SSF56796			----MNK--RKILVPLGDKSYEVTLEAGILNNISEELLKIGITKNRKILVISNEEISNLYGEKFLNNLKDNKFQAKMVLIKAGESYKNLKTLSEIYDVAFEFGLDRNSIIIALGGGIVGDVSGFAAATWLRGIEYIQIPTTLLSMVDSSVGGKTGVNHPKGKNLIGAFNQPKAVFIDPETLKSLPKREFSAGMAEVIKYGVIRDKELFKYLEIEKNKNELINLKNEYLIKIINSSIKTKSHIVSQDEHENGVRAILNYGHSFGHVIENLCGYGKFLHGEAISIGMNIAGKIAIEKGLWSKEELERQKILLESYDLPTEIPKINKEDVLTILMGDKKVRDGKMRFILPKEIGAVDIYDDVEDSLFLKFFS-----
	1739	GC_00000509	HL+LL Core	MIT9302	26590	ECG	167546.P9301_07351	3-dehydroquinate synthase	G3DSA:3.40.50.1970	G3DSA:3.40.50.1970			TIGR01357	aroB: 3-dehydroquinate synthase			E	E	PIRSF001455	PIRSF001455	COG0337	3-dehydroquinate synthetase	MF_00110	3-dehydroquinate synthase [aroB].			PF01761	3-dehydroquinate synthase					SSF56796	SSF56796			----MNN--RKILVPLGDKSYEVTIEAGILNNISEELLKIGITKNRKILVISNEEISNLYGEKFLNNLKDNQFQAKMFLIKAGESYKNLKTLSEIYDVAFEFGLDRNSIIIALGGGIVGDVSGFAAATWLRGIEYIQIPTTLLSMVDSSVGGKTGVNHPKGKNLIGAFNQPRAVFIDPETLKSLPKREFNAGIAEVIKYGVIRDKELFEYLEIEKNKNELINLKNEYLIKIINSSIKTKSHIVSQDEHENGVRAILNYGHSFGHVIENLCGYGKFLHGEAISIGMNIAGEIAIDKGLWSKEELERQKNLLKSYDLPTEIPKIKKEEVLTILMGDKKVRDGKMRFILPKEIGEVDIYDDVEDSLFLKFFS-----
	1720	GC_00000509	HL+LL Core	MIT9303	29630	ECG	74547.PMT0667	3-dehydroquinate synthase	G3DSA:1.20.1090.10	G3DSA:1.20.1090.10			TIGR01357	aroB: 3-dehydroquinate synthase			E	E	PIRSF001455	PIRSF001455	COG0337	3-dehydroquinate synthetase	MF_00110	3-dehydroquinate synthase [aroB].			PF01761	3-dehydroquinate synthase					SSF56796	SSF56796			MSAFVNIDAQRIPVALSHQPYEVVIGGEGLRGVGKELRRAGLKEGIKVLVVSNADVAEPYGDLCLQSLSDSGYRPTLLVIEAGEDQKTPVSVALIHDAAYEAKLERGSLMVALGGGVVGDMTGFAAATWLRGISVVQLPTTLLAMVDAAIGGKTGVNHPGGKNLIGAFHQPRLVLIDPSTLNTLPEREFRAGMAEVIKYGVIGDAALFQLLEGIPELNTPSQLHADLLEKILERSALAKSRVVSSDEREGGLRAILNYGHTFGHVVETLCGYGTWLHGEAVAIGMVAVGELAVLRQSWNRDDANRQKSLIAKAGLPIAWPKLDPEEVLYTLQGDKKVKDGKLRFVIPTGIGNVEIKNDVSREEIRKCLSELS--
	1748	GC_00000509	HL+LL Core	MIT9311	32702	ECG	74546.PMT9312_0682	3-dehydroquinate synthase	G3DSA:3.40.50.1970	G3DSA:3.40.50.1970			TIGR01357	aroB: 3-dehydroquinate synthase			E	E	PIRSF001455	PIRSF001455	COG0337	3-dehydroquinate synthetase	MF_00110	3-dehydroquinate synthase [aroB].			PF01761	3-dehydroquinate synthase					SSF56796	SSF56796			----MNK--RKILVPLGNKSYEVTIEAGILNNISEELLKIGITKNRKILVISNEEISNFYGEKFLNDLKDNKFQVQMFLIKAGESYKNLKTLSEIYDVAFEFGLDRNSIIIALGGGIVGDVSGFAAATWLRGIEYIQIPTTLLSMVDSSVGGKTGVNHPKGKNLIGAFNQPKAVFIDPETLKSLPKREFSAGMAEVIKYGVIRDKELFEYLEIEKNKNELINLKNEYLIKIINSSIKTKSYIVSQDEHENGVRAILNYGHSFGHVIENLCGYGKFLHGEAISIGMNIAGEIAIDKGLWSKEELERQKNLLKSYDLPTEIPKINKEDVLTILMGDKKVRNGKMRFILPKEIGVVDIYDDVEDALFLKFFS-----
	1734	GC_00000509	HL+LL Core	MIT9312	33553	ECG	74546.PMT9312_0682	3-dehydroquinate synthase	G3DSA:3.40.50.1970	G3DSA:3.40.50.1970			TIGR01357	aroB: 3-dehydroquinate synthase			E	E	PIRSF001455	PIRSF001455	COG0337	3-dehydroquinate synthetase	MF_00110	3-dehydroquinate synthase [aroB].			PF01761	3-dehydroquinate synthase					SSF56796	SSF56796			----MNK--RKILVPLGNKSYEVTIEAGILNNISEELLKIGITKNRKILVISNEEISNFYGEKFLNDLKDNKFQVQMFLIKAGESYKNLKTLSEIYDVAFEFGLDRNSIIIALGGGIVGDVSGFAAATWLRGIEYIQIPTTLLSMVDSSVGGKTGVNHPKGKNLIGAFNQPKAVFIDPETLKSLPKREFSAGMAEVIKYGVIRDKELFEYLEIEKNKNELINLKNEYLIKIINSSIKTKSYIVSQDEHENGVRAILNYGHSFGHVIENLCGYGKFLHGEAISIGMNIAGEIAIDKGLWSKEELERQKNLLKSYDLPTEIPKINKEDVLTILMGDKKVRNGKMRFILPKEIGVVDIYDDVEDALFLKFFS-----
	1726	GC_00000509	HL+LL Core	MIT9313	35506	ECG	74547.PMT0667	3-dehydroquinate synthase	G3DSA:1.20.1090.10	G3DSA:1.20.1090.10			TIGR01357	aroB: 3-dehydroquinate synthase	Coil	Coil	E	E	PIRSF001455	PIRSF001455	COG0337	3-dehydroquinate synthetase	MF_00110	3-dehydroquinate synthase [aroB].			PF01761	3-dehydroquinate synthase					SSF56796	SSF56796			MSAFVNIDAQRIPVALSHQPYEVVIGGEGLRGVGKELRRAGLKEGIKVLVVSNADVAEPYGDLCLQSLKESGFRPTLLVIEAGEDQKTPVSVALIHDAAYEAKLERGSLMVALGGGVVGDMTGFAAATWLRGISVVQLPTTLLAMVDAAIGGKTGVNHPGGKNLIGAFHQPRLVLIDPSTLKTLPEREFRAGMAEVIKYGVIGDSALFQLLEGIQELDTPSQLHQDLLEKILERSALAKSRVVSSDEREGGLRAILNYGHTFGHVVETLCGYGNWLHGEAVAIGMVAVGELAVLRQSWSRDDANRQKSLIAKAGLPIAWPKLDPEEVLYTLQGDKKVKDGKLRFVIPTGIGNVEIKNDVSREEIRKCLSELS--
	1725	GC_00000509	HL+LL Core	MIT9314	37775	ECG	167546.P9301_07351	3-dehydroquinate synthase	G3DSA:3.40.50.1970	G3DSA:3.40.50.1970			TIGR01357	aroB: 3-dehydroquinate synthase			E	E	PIRSF001455	PIRSF001455	COG0337	3-dehydroquinate synthetase	MF_00110	3-dehydroquinate synthase [aroB].			PF01761	3-dehydroquinate synthase					SSF56796	SSF56796			----MNK--RKILVPLGVKSYEVTLEPGILNNISEELLKIGITKNRKILVISNEEISNLYGEKFLNNLKDNKFQAQMFLIKAGESYKNLKTLSEIYDVAFEFGLDRNSIIIALGGGIVGDVSGFAAATWLRGIEYIQIPTTLLSMVDSSVGGKTGVNHPKGKNLIGAFNQPKAVFIDPETLKSLPKREFSAGMAEVIKYGVIRDKELFEYLEIEKNKNELVNLKNEYLIKIIDSSIKTKSHIVSQDEHENGVRAILNYGHSFGHVIENLCGYGKFLHGEAISIGMNIAGEIAIEKGLWSKEELERQKNLLKNYDLPTQIPKINKEDVLTILMGDKKVRDGKMRFILPKEIGEVDIYDDVEDSLFLKFFS-----
	1732	GC_00000509	HL+LL Core	MIT9321	39506	ECG	146891.A9601_07371	3-dehydroquinate synthase	G3DSA:3.40.50.1970	G3DSA:3.40.50.1970			TIGR01357	aroB: 3-dehydroquinate synthase			E	E	PIRSF001455	PIRSF001455	COG0337	3-dehydroquinate synthetase	MF_00110	3-dehydroquinate synthase [aroB].			PF01761	3-dehydroquinate synthase					SSF56796	SSF56796			----MNK--RKILVPLGDKSYEVTLEAGILNNISEELLKIGIKNNRKILVISNEEISNLYGEKFLNNLKENQFQAKMFLIKAGESYKNLKTLSEIYDIAFEFGLDRNSIIIALGGGIVGDVSGFAAATWLRGIEYIQIPTTLLSMVDSSVGGKTGVNHPKGKNLIGAFNQPKAVFIDPETLKSLPKREFNAGMAEVIKYGVIRDKELFEYLEIEKNKNELINLKNDYLIKIIDSSIKTKSQIVSQDEHENGVRAILNYGHSFGHVIENLCGYGKFLHGEAISIGMNIAGKIAIEKGLWSKEELERQNNLLKSYDLPTKIPAINKEDILTILRGDKKVRNGKIRFILPQEIGAVGIYDDVEDSLFLKFFS-----
	1723	GC_00000509	HL+LL Core	MIT9322	42663	ECG	146891.A9601_07371	3-dehydroquinate synthase	G3DSA:3.40.50.1970	G3DSA:3.40.50.1970			TIGR01357	aroB: 3-dehydroquinate synthase			E	E	PIRSF001455	PIRSF001455	COG0337	3-dehydroquinate synthetase	MF_00110	3-dehydroquinate synthase [aroB].			PF01761	3-dehydroquinate synthase					SSF56796	SSF56796			----MNK--RKILVPLGDKSYEVTLEAGILNNISEELLKIGIKNNRKILVISNEEISNLYGEKFLNNLKENQFQAKMFLIKAGESYKNLKTLSEIYDIAFEFGLDRNSIIIALGGGIVGDVSGFAAATWLRGIEYIQIPTTLLSMVDSSVGGKTGVNHPKGKNLIGAFNQPKAVFIDPETLKSLPKREFNAGMAEVIKYGVIRDKELFEYLEIEKNKNELINLKNDYLIKIIDSSIKTKSQIVSQDEHENGVRAILNYGHSFGHVIENLCGYGKFLHGEAISIGMNIAGKIAIEKGLWSKEELERQNNLLKSYDLPTKIPAINKEDILTILRGDKKVRNGKIRFILPQEIGAVGIYDDVEDSLFLKFFS-----
	1744	GC_00000509	HL+LL Core	MIT9401	44525	ECG	146891.A9601_07371	3-dehydroquinate synthase	G3DSA:3.40.50.1970	G3DSA:3.40.50.1970			TIGR01357	aroB: 3-dehydroquinate synthase			E	E	PIRSF001455	PIRSF001455	COG0337	3-dehydroquinate synthetase	MF_00110	3-dehydroquinate synthase [aroB].			PF01761	3-dehydroquinate synthase					SSF56796	SSF56796			----MNK--RKILVPLGDKSYEVTLEAGILNNISEELLKIGIKNNRKILVISNEEISNLYGEKFLNNLKENQFQAKMFLIKAGESYKNLKTLSEIYDIAFEFGLDRNSIIIALGGGIVGDVSGFAAATWLRGIEYIQIPTTLLSMVDSSVGGKTGVNHPKGKNLIGAFNQPKAVFIDPETLKSLPKREFNAGMAEVIKYGVIRDKELFEYLEIEKNKNELINLKNDYLIKIIDSSIKTKSQIVSQDEHENGVRAILNYGHSFGHVIENLCGYGKFLHGEAISIGMNIAGKIAIEKGLWSKEELERQNNLLKSYDLPTKIPAINKEDILTILRGDKKVRNGKIRFILPQEIGAVGIYDDVEDSLFLKFFS-----
	1724	GC_00000509	HL+LL Core	MIT9515	45649	ECG	167542.P9515_07551	3-dehydroquinate synthase	G3DSA:3.40.50.1970	G3DSA:3.40.50.1970			TIGR01357	aroB: 3-dehydroquinate synthase			E	E	PIRSF001455	PIRSF001455	COG0337	3-dehydroquinate synthetase	MF_00110	3-dehydroquinate synthase [aroB].			PF01761	3-dehydroquinate synthase					SSF56796	SSF56796			----MNK--NKIIVPLSNNSYEVTIRQGIINSIGKELTQIGINNNRKILIVSNKEISNLFGSKLLNDLKKYNFSAEIFNIKAGESYKNLASLREIYDAAFEFGLDRNALLIALGGGIVGDVTGFAAATWLRGIDYIQIPTTLLSMVDSSVGGKTAVNHPKGKNLIGAFYQPKAVFIDPETLKTLPIREFKAGMAEVIKYGVIKDKELFEYLEIDKNREKILNLDNESLIKIINKSIRTKSYIVSKDEKENGIRAILNYGHSFGHVIENLCGYGEYLHGEAISIGMKIAGDISTEKNLWLKEDSLRQDKLIESYGLPTQTPKIKKHDVITILMGDKKVRDGKMRFILPKGIGEVDIFNDIKESQFLKYFD-----
	1747	GC_00000509	HL+LL Core	NATL1A	47475	ECG	167555.NATL1_07421	3-dehydroquinate synthase	G3DSA:1.20.1090.10	G3DSA:1.20.1090.10			TIGR01357	aroB: 3-dehydroquinate synthase			E	E	PIRSF001455	PIRSF001455	COG0337	3-dehydroquinate synthetase	MF_00110	3-dehydroquinate synthase [aroB].			PF01761	3-dehydroquinate synthase					SSF56796	SSF56796			----MNKDNHHIKVSLTNNPYEIVIGKNSLESIGDELFNIGFREGLKVLVVSNKEVSDHYGDCIIKSLIKSKFKPKLLIIKAGEDQKNQSSIDLIHNAAYEARLERGSLMIALGGGVIGDMTGFAAATWLRGVNVVQIPTTLLAMVDASIGGKTGINHSKGKNLIGAFHQPRLVLIDPKTLISLPSREFKAGMAEIIKYGVISDLELFDLLERQENIADLSNIKEKLLLEIIKRSAKSKAEIVIKDEKESGVRAFLNYGHTFGHVIENLCGYGKWLHGEAVAMGMVAVGQLAVQRGLWNEDNAKRQKRLIEKAGLPSNWPKLDIESVLSSLQGDKKVKNGKVSFVMPLKIGDVKLFNNISNKEIRECLQKIS--
	1722	GC_00000509	HL+LL Core	NATL2A	49492	ECG	167555.NATL1_07421	3-dehydroquinate synthase	G3DSA:3.40.50.1970	G3DSA:3.40.50.1970			TIGR01357	aroB: 3-dehydroquinate synthase			E	E	PIRSF001455	PIRSF001455	COG0337	3-dehydroquinate synthetase	MF_00110	3-dehydroquinate synthase [aroB].			PF01761	3-dehydroquinate synthase					SSF56796	SSF56796			----MNKDNHHIKVSLTNNPYEIVIGKSSLESIGDELFNIGFREGLKVLVVSNKEVSDHYGDCIIKSLIKSKFKPKLLIIKAGEDQKNQSSIDLIHNAAYEARLERGSLMIALGGGVIGDMTGFAAATWLRGVNVVQIPTTLLAMVDASIGGKTGINHSKGKNLIGAFHQPRLVLIDPKTLITLPSREFKAGMAEIIKYGVISDLELFELLERQENISDLSNIKEKLLIEIIKRSAKSKAEIVIKDEKESGVRAFLNYGHTFGHVIENLCGYGKWLHGEAVAMGMVAVGQLAVQRGLWKEDNAKRQKRLIEKAGLPSNWPQLEIESVLSSLQGDKKVKNGKVSFVMPLKIGDVKLFNNISNKEIRECLQKIS--
	1721	GC_00000509	HL+LL Core	PAC1	52489	ECG	167555.NATL1_07421	3-dehydroquinate synthase	G3DSA:1.20.1090.10	G3DSA:1.20.1090.10			TIGR01357	aroB: 3-dehydroquinate synthase			E	E	PIRSF001455	PIRSF001455	COG0337	3-dehydroquinate synthetase	MF_00110	3-dehydroquinate synthase [aroB].			PF01761	3-dehydroquinate synthase					SSF56796	SSF56796			----MNKDNHHIKVSLTNNPYEIVIGKSSLESIGDELFNIGFREGLKVLVVSNKEVSDHYGDCIIKSLIKSKFKPKLLIIKAGEDQKNQSSIDLIHNVAYEARLERGSLMIALGGGVIGDITGFAAATWLRGVNVVQIPTTLLAMVDASIGGKTGINHSKGKNLIGAFHQPRLVLIDPKTLITLPSREFKAGMAEIIKYGVISDFELFDLLERQENISDLSNIKEKLLIEIIKRSAKSKAEIVIKDEKESGVRAFLNYGHTFGHVIENLCGYGKWLHGEAVAMGMVAVGQLAVQRGLWKEDNAKRQKRLIEKAGLPSNWPKLEIESVLSSLQGDKKVKNGKVSFVMPLKIGDVKLFNNISNKEIRECLKKIS--
	1736	GC_00000509	HL+LL Core	SB	52885	ECG	167546.P9301_07351	3-dehydroquinate synthase	G3DSA:3.40.50.1970	G3DSA:3.40.50.1970			TIGR01357	aroB: 3-dehydroquinate synthase			E	E	PIRSF001455	PIRSF001455	COG0337	3-dehydroquinate synthetase	MF_00110	3-dehydroquinate synthase [aroB].			PF01761	3-dehydroquinate synthase					SSF56796	SSF56796			----MNK--RRILVPLGDKSYEVTLEAGILNNISEELLKIGITKNRKILVISNEEISNLYGEKFLNNLKDNQYQAKMFLIKAGESYKNLKTLSEIYDVAFEFGLDRNSIIIALGGGIVGDVSGFAAATWLRGIEYIQIPTTLLSMVDSSVGGKTGVNHPKGKNLIGAFNQPKAVFIDPETLKSLPKREFNAGMAEVIKYGVIRDKELFEYLEIEKNKNEFLNLKNEYLIKIINSSIKTKSHIVSQDEHENGVRAILNYGHSFGHVIENLCGYGKFLHGEAISIGMNIAGEVAIEKGLWSKEELERQKNLLKSYDLPTEIPKINKEDVLTILMGDKKVRDGKMRFILPKEIGAVDIYDDVEDSLFLKFFS-----
	1719	GC_00000509	HL+LL Core	SS2	56042	NA	167539.Pro1009	3-dehydroquinate synthase	G3DSA:3.40.50.1970	G3DSA:3.40.50.1970			TIGR01357	aroB: 3-dehydroquinate synthase			E	E	PIRSF001455	PIRSF001455	COG0337	3-dehydroquinate synthetase	MF_00110	3-dehydroquinate synthase [aroB].			PF01761	3-dehydroquinate synthase					SSF56796	SSF56796			----MNQDNCRIKVNLKNNPYEVVVGSEILYTIGEELLRINIRTGEKILIVTNPDVSKPYSRRFITSLKEAGYDANLLILEAGENKKNYESIALIHNAAYEHQLDRGSLIIALGGGVIGDMAGFAAATWLRGIDFVQVPTTLLAMVDASVGGKTGVNHPKGKNLIGAFHQPKLVLIDINTLKTLPQREFRSGMAEIIKYGVIKDLELFNKLENEEDLSNIYSIKECVLLELIKISVSIKARIVEKDEKESGLRAILNYGHTFGHVIETLCGYGHWLHGEAVSMGMVLIGQLALRKNLWNVDDALRQEKLLTKAGLPISWPKINNEDVLRTLKGDKKVDKGNIRLIVPLGIGMVEILNDVSENEIKSLLESI---
	1746	GC_00000509	HL+LL Core	SS35	57545	NA	167539.Pro1009	3-dehydroquinate synthase	G3DSA:3.40.50.1970	G3DSA:3.40.50.1970			TIGR01357	aroB: 3-dehydroquinate synthase			E	E	PIRSF001455	PIRSF001455	COG0337	3-dehydroquinate synthetase	MF_00110	3-dehydroquinate synthase [aroB].			PF01761	3-dehydroquinate synthase					SSF56796	SSF56796			----MNQDNCRIKVNLKNNPYEVVVGSEILYTIGEELLRINIRTGEKILIVTNPDVSKPYSRRFITSLKEAGYDANLLILEAGENKKNYESIALIHNAAYEHQLDRGSLIIALGGGVIGDMAGFAAATWLRGIDFVQVPTTLLAMVDASVGGKTGVNHPKGKNLIGAFHQPKLVLIDINTLKTLPQREFRSGMAEIIKYGVIKDLELFNKLENEEDLSNIYSIKECVLLELIKISVSIKARIVEKDEKESGLRAILNYGHTFGHVIETLCGYGHWLHGEAVSMGMVLIGQLALRKNLWNVDDALRQEKLLTKAGLPISWPKINNEDVLRTLKGDKKVDKGNIRLIVPLGIGMVEILNDVSENEIKSLLESI---
	1738	GC_00000509	HL+LL Core	SS51	59659	NA	167539.Pro1009	3-dehydroquinate synthase	G3DSA:3.40.50.1970	G3DSA:3.40.50.1970			TIGR01357	aroB: 3-dehydroquinate synthase			E	E	PIRSF001455	PIRSF001455	COG0337	3-dehydroquinate synthetase	MF_00110	3-dehydroquinate synthase [aroB].			PF01761	3-dehydroquinate synthase					SSF56796	SSF56796			----MNQDNCRIKVNLKNNPYEVVVGSEILYTIGEELLRINIRTGEKILIVTNPDVSKPYSRRFITSLKEAGYDANLLILEAGENKKNYESIALIHNAAYEHQLDRGSLIIALGGGVIGDMAGFAAATWLRGIDFVQVPTTLLAMVDASVGGKTGVNHPKGKNLIGAFHQPKLVLIDINTLKTLPQREFRSGMAEIIKYGVIKDLELFNKLENEEDLSNIYSIKECVLLELIKISVSIKARIVEKDEKESGLRAILNYGHTFGHVIETLCGYGHWLHGEAVSMGMVLIGQLALRKNLWNVDDALRQEKLLTKAGLPISWPKINNEDVLRTLKGDKKVDKGNIRLIVPLGIGMVEILNDVSENEIKSLLESI---
	53733	GC_00005827	Singletons	MIT9303	28372	ECG	940615.AciX9_0192	3-dehydroquinate synthase	G3DSA:3.40.50.1970	G3DSA:3.40.50.1970							E	E			COG0337	3-dehydroquinate synthetase					PF01761	3-dehydroquinate synthase					SSF56796	SSF56796			MADPLTLDIQSSYANYKVAFSDLNDLSKCCFEADAFLVDAFFRDRLPLPANVPVVWIESNEDAKALPATIDVFVALKQAGLGRGSHLIAIGGGVIQDIATFVASLYMRGISWSYVPTTFLGMVDSCLGGKSSINVGPYKNLVGNFHPPRRIDILPVFARSLPMVEMAGGAAEAAKISFCRGKTAFANYEQLASPVLAGAWTEEELAQLLHATLAVKKWFIEKDEFDQAERRLLNFGHTWGHALESATAFAIPHGLAVGLGMMASIRFVGTEITDSLLWQHCMNLLKPILLLKQLTVFDADVFVKAFRADKKHSSGHFHLIVPAAVADSGLGVEEIRLRSDDASLARILKAMQEVLAIVSDELSDKKSLANRL
	45128	GC_00004810		MIT9303	30520	ECG	74547.PMT1912	3-deoxy-d-manno-octulosonate 8-phosphate phosphatase	G3DSA:3.40.50.1000	G3DSA:3.40.50.1000			TIGR01670	KdsC-phosphatas: 3-deoxy-D-manno-octulosonate 8-phosphate phosphatase, YrbI family	Coil	Coil	R|M	R|M	PIRSF006118	PIRSF006118	COG1778	3-deoxy-D-manno-octulosonate 8-phosphate phosphatase KdsC and related HAD superfamily phosphatases											SSF56784	SSF56784			MSGTTLISRTHPRYWNRELQWRLQWKALASIDLLVMDVDGVLTDGGLWLDAHGELQKRFDVRDGLGLRLLQQEGLTLALLSGGKGGATEARAKQLGIQHCFVGIKDKTAALAELQQQLNLSQLNTAFVGDDLNDLIVRPLVKLLLAPADACRPLRSQADAVLQRRGGHGAVRELAERLLKARGQWHQLRKKGWKDRND
	45129	GC_00004810		MIT9313	36922	ECG	74547.PMT1912	3-deoxy-d-manno-octulosonate 8-phosphate phosphatase	G3DSA:3.40.50.1000	G3DSA:3.40.50.1000			TIGR01670	KdsC-phosphatas: 3-deoxy-D-manno-octulosonate 8-phosphate phosphatase, YrbI family	Coil	Coil	R|M	R|M	PIRSF006118	PIRSF006118	COG1778	3-deoxy-D-manno-octulosonate 8-phosphate phosphatase KdsC and related HAD superfamily phosphatases											SSF56784	SSF56784			MSGTTLISRTHPRYWNRELQWRLQWKALASIDLLVMDVDGVLTDGGLWLDAHGELQKRFDVRDGLGLRLLQQEGLTLALLSGGKGGATEARAKQLGIQHCFVGIKDKTAALAELQQQLNLSQLNTAFVGDDLNDLIVRPLVKLLLAPADACRPLRSQADAVLQRRGGHGAVRELAERLLKARGQWHQLRKKGWKERND
	10542	GC_00002011		CCMP1375	3053	NA	167539.Pro1229	3-hydroxyisobutyrate dehydrogenase	G3DSA:3.40.50.720	G3DSA:3.40.50.720							I	I	PIRSF000103	PIRSF000103	COG2084	3-hydroxyisobutyrate dehydrogenase or related beta-hydroxyacid dehydrogenase					PF03446	NAD binding domain of 6-phosphogluconate dehydrogenase					SSF51735	SSF51735			------MFHPRLAFVGLGTIGLPIAANLISAGFKMKVHTRSRKAEKDKRLKGAISCSSPKEVVKGCEVLLICVSDDEAIEEVLFSSQGAYKNLKKKSLVIDFSTISPAKSRSIAKRLAKQNVDYIDAPVTGGTEGANKGSLTIFLGCKDIFLKEIIPFLKPIATNIYCFGEVGKGQEVKAINQILVAGSYAAVAEAIALGEQLDLPMDAVIKALQTGAASSWALSNRSNAMLKDEYPLGFKLGLHYKDLSIALNTAESIGLELPITKKVREIEKELISEGFENEDVSVLKRSIRKSSVIFPKKN
	10538	GC_00002011		LG	7934	NA	167539.Pro1229	3-hydroxyisobutyrate dehydrogenase	G3DSA:3.40.50.720	G3DSA:3.40.50.720							I	I	PIRSF000103	PIRSF000103	COG2084	3-hydroxyisobutyrate dehydrogenase or related beta-hydroxyacid dehydrogenase					PF03446	NAD binding domain of 6-phosphogluconate dehydrogenase					SSF51735	SSF51735			------MFHPRLAFVGLGTIGLPIAANLISAGFKMKVHTRSRKAEKDKRLKGAISCSSPKEVVKGCEVLLICVSDDEAIEEVLFSSQGAYKNLKKKSLVIDFSTISPAKSRSIAKRLAKQNVDYIDAPVTGGTEGANKGSLTIFLGCKDIFLKEIIPFLKPIATNIYCFGEVGKGQEVKAINQILVAGSYAAVAEAIALGEQLDLPMDAVIKALQTGAASSWALSNRSNAMLKDEYPLGFKLGLHYKDLSIALNTAESIGLELPITKKVREIEKELISEGFENEDVSVLKRSIRKSSVIFPKKN
	10540	GC_00002011		MIT9211	21862	NA	167539.Pro1229	3-hydroxyisobutyrate dehydrogenase	G3DSA:3.40.50.720	G3DSA:3.40.50.720							I	I	PIRSF000103	PIRSF000103	COG2084	3-hydroxyisobutyrate dehydrogenase or related beta-hydroxyacid dehydrogenase					PF03446	NAD binding domain of 6-phosphogluconate dehydrogenase					SSF51735	SSF51735			------MKEESLGFVGLGAIGLPIAKNLLAAGYNLRVHTRSRTAEKDPGLKGANACSSPRDVAKGCEVFFICVSDDDAVEDVLFGSKGASQSLDKGSLIIDLSTISPSSARSNERTLAKKHIQYIDAPVTGGTEGAINGDLAIFLGCSKQTLGKINPLIKSIATHIYTFGEVGKGQEVKAINQILVAGSYAAVAEAIALGQTLELPMNIVIDALSKGAASSWALANRSKAMLEDQYPLGFKLGLHYKDLLIALKTAEELGLTLEVTKKVKDIEKKLIHNGFSDYDVSVLRRSVAK---------
	10536	GC_00002011		MIT9303	30736	ECG	74547.PMT2105	3-hydroxyisobutyrate dehydrogenase	G3DSA:3.40.50.720	G3DSA:3.40.50.720							I	I	PIRSF000103	PIRSF000103	COG2084	3-hydroxyisobutyrate dehydrogenase or related beta-hydroxyacid dehydrogenase					PF03446	NAD binding domain of 6-phosphogluconate dehydrogenase					SSF51735	SSF51735			MSKAQLSPRSSLAFVGLGALGLPMAANLLAAGYELKVHSRSRAAELNLALKGSRPCSSPAEAAADSQALLICVSDDEAVEAVLFGSQGAASKLSSGAVVVDFSTIAPATSITLAERLAQQGVTYLDAPVTGGTEGARAGTLTVLVGGNTQALARVQPLLEVIGESIHHFGSVGRGQQVKALNQVLVAGSYAALAEAIALGQQLGLPMPEVITALQHGAAGSWALQHRSTAMLEDHYPLGFKLALHHKDLGIALETAERVGLQLPITSKVKSMEANLIELGHSEEDVSVLRRWFDQQQAEFQ---
	10537	GC_00002011		MIT9313	37133	ECG	74547.PMT2105	3-hydroxyisobutyrate dehydrogenase	G3DSA:3.40.50.720	G3DSA:3.40.50.720							I	I	PIRSF000103	PIRSF000103	COG2084	3-hydroxyisobutyrate dehydrogenase or related beta-hydroxyacid dehydrogenase					PF03446	NAD binding domain of 6-phosphogluconate dehydrogenase					SSF51735	SSF51735			MSKAQLSPRSSLAFVGLGALGLPMAANLLAAGYELKVHSRSRAAEQNLALQGSRSCSSPAEAAADSQALLICVSDDEAVEEVLFGSQGAASMLSSGAVVVDFSTITPATSISMAERLADQGVTYLDAPVTGGTEGARAGTLTVLVGGNKQALARVQPLLEVIGERIHHFGSVGRGQQVKALNQVLVAGSYAALAEAIALGQQLGLPMQEVITALQHGAAGSWALKHRSTAMLEDHYPLGFKLALHHKDLGIALETAERAGLQLPITSQVKSMEANLIEHGHSEEDVSVLRRWFDQQQAESQPF-
	10535	GC_00002011		SS2	55553	NA	167539.Pro1229	3-hydroxyisobutyrate dehydrogenase	G3DSA:3.40.50.720	G3DSA:3.40.50.720							I	I	PIRSF000103	PIRSF000103	COG2084	3-hydroxyisobutyrate dehydrogenase or related beta-hydroxyacid dehydrogenase					PF03446	NAD binding domain of 6-phosphogluconate dehydrogenase					SSF51735	SSF51735			------MFHPRLAFVGLGTIGLPIAANLISAGFKMKVHTRSRKAEKDKRLKGAISCSSPKEVVKGCEVLLICVSDDEAIEEVLFSSQGAYKNLKKKSLVIDFSTISPAKSRSIAKRLAKQNVDYIDAPVTGGTEGANKGSLTIFLGCKDIFLKEIIPFLKPIATNIYCFGEVGKGQEVKAINQILVAGSYAAVAEAIALGEQLDLPMDAVIKALQTGAASSWALSNRSNAMLKDEYPLGFKLGLHYKDLSIALNTAESIGLELPITKKVREIEKELISEGFENEDVSVLKRSIRKSSVIFPKKN
	10541	GC_00002011		SS35	56592	NA	167539.Pro1229	3-hydroxyisobutyrate dehydrogenase	G3DSA:3.40.50.720	G3DSA:3.40.50.720							I	I	PIRSF000103	PIRSF000103	COG2084	3-hydroxyisobutyrate dehydrogenase or related beta-hydroxyacid dehydrogenase					PF03446	NAD binding domain of 6-phosphogluconate dehydrogenase					SSF51735	SSF51735			------MFHPRLAFVGLGTIGLPIAANLISAGFKMKVHTRSRKAEKDKRLKGAISCSSPKEVVKGCEVLLICVSDDEAIEEVLFSSQGAYKNLKKKSLVIDFSTISPAKSRSIAKRLAKQNVDYIDAPVTGGTEGANKGSLTIFLGCKDIFLKEIIPFLKPIATNIYCFGEVGKGQEVKAINQILVAGSYAAVAEAIALGEQLDLPMDAVIKALQTGAASSWALSNRSNAMLKDEYPLGFKLGLHYKDLSIALNTAESIGLELPITKKVREIEKELISEGFENEDVSVLKRSIRKSSVIFPKKN
	10539	GC_00002011		SS51	58810	NA	167539.Pro1229	3-hydroxyisobutyrate dehydrogenase	G3DSA:3.40.50.720	G3DSA:3.40.50.720							I	I	PIRSF000103	PIRSF000103	COG2084	3-hydroxyisobutyrate dehydrogenase or related beta-hydroxyacid dehydrogenase					PF03446	NAD binding domain of 6-phosphogluconate dehydrogenase					SSF51735	SSF51735			------MFHPRLAFVGLGTIGLPIAANLISAGFKMKVHTRSRKAEKDKRLKGAISCSSPKEVVKGCEVLLICVSDDEAIEEVLFSSQGAYKNLKKKSLVIDFSTISPAKSRSIAKRLAKQNVDYIDAPVTGGTEGANKGSLTIFLGCKDIFLKEIIPFLKPIATNIYCFGEVGKGQEVKAINQILVAGSYAAVAEAIALGEQLDLPMDAVIKALQTGAASSWALSNRSNAMLKDEYPLGFKLGLHYKDLSIALNTAESIGLELPITKKVREIEKELISEGFENEDVSVLKRSIRKSSVIFPKKN
	11661	GC_00003018		NATL1A	47631	ECG	167555.NATL1_08981	3-hydroxyisobutyrate dehydrogenase	G3DSA:3.40.50.720	G3DSA:3.40.50.720							I	I	PIRSF000103	PIRSF000103	COG2084	3-hydroxyisobutyrate dehydrogenase or related beta-hydroxyacid dehydrogenase					PF03446	NAD binding domain of 6-phosphogluconate dehydrogenase					SSF51735	SSF51735			MKLAFIGLGAIGKPMSQRLIDNGYDLNLYQRNKLNNDSKRKYFFDPIEAVSDCDGLLICVTDDNAVESVLFGDNGVSGSLKPNSFVIDFSTISPDKSISIHKRLGEQNIFYVDCPVSGGTEGAHNGSLSLFIGASEKDCLSFENIFQVLGKSINYFNGVGKGQQVKALNQILVAGTYAAVAEAMELGKMLELPMDDVVAALKVGAANSWPLENRSKAMLIDKHPLGFKLELHHKDLSIATELAKSINIDLPIASKVKEMEQRLMQTGLGELDVSVLHRYISNKRINH
	11660	GC_00003018		NATL2A	49614	ECG	167555.NATL1_08981	3-hydroxyisobutyrate dehydrogenase	G3DSA:3.40.50.720	G3DSA:3.40.50.720							I	I	PIRSF000103	PIRSF000103	COG2084	3-hydroxyisobutyrate dehydrogenase or related beta-hydroxyacid dehydrogenase					PF03446	NAD binding domain of 6-phosphogluconate dehydrogenase					SSF51735	SSF51735			MKLAFIGLGAIGKPMSERLIDNGYDLNIYKRDKLKNNDPKKYFVDPIEAVTDCDGLLICVTDDNAVESVLFGDNGVADSLKPKSFVIDFSTISPNKSISIHKRLSKKNIFYVDCPVSGGTEGAYKGSLSLFIGASKKECLSFEHIFEVLGKSINYFNGVGKGQQVKALNQILVAGTYAAVAEAMELGKLLDLPMDDVVAALKVGAANSWPLENRSKAMLIDKHPLGFKLELHHKDLAIAIDLAKSINIDLPIASKVKEIEQRLMQAGLGELDVSVLHRYISGAKKEG
	11659	GC_00003018		PAC1	52610	ECG	167555.NATL1_08981	3-hydroxyisobutyrate dehydrogenase	G3DSA:3.40.50.720	G3DSA:3.40.50.720							I	I	PIRSF000103	PIRSF000103	COG2084	3-hydroxyisobutyrate dehydrogenase or related beta-hydroxyacid dehydrogenase					PF03446	NAD binding domain of 6-phosphogluconate dehydrogenase					SSF51735	SSF51735			MKLAFIGLGAIGKPMSERLIDNGYDLNIYKRDKLKNNDQKKYFVDPIEAVTDCDGLLICVTDDNAVESVLFGDNGVADSLKPKSFVIDFSTISPNKSISIHKRLSKKNIFYVDCPVSGGTEGAHKGSLSLFIGASKKECLSFEHIFEVLGKSINYFNGVGKGQQVKALNQILVAGTYAAVAEAMELGKLLDLPMDDVVAALKVGAANSWPLENRSKAMLIDKHPLGFKLELHHKDLAIAIDLAKSINIDLPIASKVKEIEQRLMQAGLGELDVSVLHRYISGAKKEG
	44948	GC_00000827		AS9601	250	ECG	146891.A9601_02551	3-methyladenine DNA glycosylase	G3DSA:3.10.300.10	G3DSA:3.10.300.10							L	L			COG2094	3-methyladenine DNA glycosylase Mpg					PF02245	Methylpurine-DNA glycosylase (MPG)					SSF50486	SSF50486			----------------------------------------------------------------------------MTESNKSLFGKPGTFYIYKSYGIHHCLNIVTDRENFASGVLIRSVFISNKNERLASGPGLVTKTFSVDISFNSLEVLDNKSLWISPRDSTLEEKDLIQTTRIGISKAKNIKWRWYLKNSRSVSKRLKGDRTPKFL---------------------------------
	44965	GC_00000827		CCMP1375	2126	NA	167539.Pro0263	3-methyladenine DNA glycosylase	G3DSA:3.10.300.10	G3DSA:3.10.300.10			TIGR00567	3mg: DNA-3-methyladenine glycosylase			L	L			COG2094	3-methyladenine DNA glycosylase Mpg	MF_00527	Putative 3-methyladenine DNA glycosylase.			PF02245	Methylpurine-DNA glycosylase (MPG)					SSF50486	SSF50486			--MLDKKTWPYQFQKHQIAISSLPINFFCRPSEEVAPDLIGCLLVKRESNKKLLWGAIVETEAYSQSEPACHGFTRKTSKNKTLFGNPGRLYVYLTYGSYYCVNIVTHKKDYANGVLLRAIAIPNENERIAAGPGLLANRFGLNRSHDNSLISVENGLWIDKGLSGSKMNSIIQTKRIGISKAKDLPWRWYLQNSRSVSKRAKGDRCPSLLDAWKPSSKEGP----------------------
	44960	GC_00000827		EQPAC1	5573	ECG	59919.PMM0234	3-methyladenine DNA glycosylase	G3DSA:3.10.300.10	G3DSA:3.10.300.10							L	L			COG2094	3-methyladenine DNA glycosylase Mpg	MF_00527	Putative 3-methyladenine DNA glycosylase.			PF02245	Methylpurine-DNA glycosylase (MPG)					SSF50486	SSF50486			--------------------------------------------------------MIVETEAYSQEEEACHGYNKKTLSNKVLFGEPGRFYIYRSYGIHHCLNIVTDKDNFASGVLIRAVFISNKNERLASGPGLVTKTFELDNKFNSLEILNNKCLWISKGKSYLEKKDLIQTTRIGISKAKNIKWRWYLKRSRSISKREKGDRNPNLKNSTNNLSGVT-----------------------
	44949	GC_00000827		GP2	5975	ECG	146891.A9601_02551	3-methyladenine DNA glycosylase	G3DSA:3.10.300.10	G3DSA:3.10.300.10							L	L			COG2094	3-methyladenine DNA glycosylase Mpg					PF02245	Methylpurine-DNA glycosylase (MPG)					SSF50486	SSF50486			----------------------------------------------------------------------------MTESNKSLFGKPGTFYIYKSYGIHHCLNIVTDKENFASGVLIRSVSISNKDERLASGPGLVTKTFSVDISFNSLEVLNNKSLWISPRDSTLEEKDLIQTTRIGISKAKNIKWRWYLKNSRSVSKRLKGDRTPKFQ---------------------------------
	44954	GC_00000827		LG	8785	NA	167539.Pro0263	3-methyladenine DNA glycosylase	G3DSA:3.10.300.10	G3DSA:3.10.300.10			TIGR00567	3mg: DNA-3-methyladenine glycosylase			L	L			COG2094	3-methyladenine DNA glycosylase Mpg	MF_00527	Putative 3-methyladenine DNA glycosylase.			PF02245	Methylpurine-DNA glycosylase (MPG)					SSF50486	SSF50486			--MLDKKTWPYQFQKHQIAISSLPINFFCRPSEEVAPDLIGCLLVKRESNKKLLWGAIVETEAYSQSEPACHGFTRKTSKNKTLFGNPGRLYVYLTYGSYYCVNIVTHKKDYANGVLLRAIAIPNENERIAAGPGLLANRFGLNRSHDNSLISVENGLWIDKGLSGSKMNSIIQTKRIGISKAKDLPWRWYLQNSRSVSKRAKGDRCPSLLDAWKPSSKEGP----------------------
	44952	GC_00000827		MED4	9489	ECG	59919.PMM0234	3-methyladenine DNA glycosylase	G3DSA:3.10.300.10	G3DSA:3.10.300.10							L	L			COG2094	3-methyladenine DNA glycosylase Mpg	MF_00527	Putative 3-methyladenine DNA glycosylase.			PF02245	Methylpurine-DNA glycosylase (MPG)					SSF50486	SSF50486			--------------------------------------------------------MIVETEAYSQEEEACHGYNKKTLSNKVLFGEPGRFYIYRSYGIHHCLNIVTDKDNFASGVLIRAVFISNKNERLASGPGLVTKTFELDNKFNSLEILNNKCLWISKGKSYLEKKDLIQTTRIGISKAKNIKWRWYLKRSRSISKREKGDRNPNLKNSTNNLSGVT-----------------------
	44951	GC_00000827		MIT9201	18564	ECG	146891.A9601_02551	3-methyladenine DNA glycosylase	G3DSA:3.10.300.10	G3DSA:3.10.300.10			TIGR00567	3mg: DNA-3-methyladenine glycosylase			L	L			COG2094	3-methyladenine DNA glycosylase Mpg	MF_00527	Putative 3-methyladenine DNA glycosylase.			PF02245	Methylpurine-DNA glycosylase (MPG)					SSF50486	SSF50486			----------------------------------MAPDLIGCYLIKKNNGTDKVKGVIVETEAYSQEEESCHGYRKMTKSNKALFGKPGTFYIYKSYGIHHCLNIVTDKENFASGVLIRSVFISKKNERLASGPGLVTKSFNVDISFNSLEVLNNKSLWISPRDSTLKEKDLIQTTRIGISKAKNIKWRWYLKNSRSVSKRLIGDRTPKFE---------------------------------
	44957	GC_00000827		MIT9202	19882	ECG	146891.A9601_02551	3-methyladenine DNA glycosylase	G3DSA:3.10.300.10	G3DSA:3.10.300.10							L	L			COG2094	3-methyladenine DNA glycosylase Mpg					PF02245	Methylpurine-DNA glycosylase (MPG)					SSF50486	SSF50486			----------------------------------------------------------------------------------------------------------------------------------------------MDKSFNSLEVLNNNSLWISQRDSSIEEKDLIQTTRIGISKAKNIKWRWYLKNSRSVSKRLKGDRTPKFK---------------------------------
	44962	GC_00000827		MIT9211	20982	NA	93059.P9211_02561	3-methyladenine DNA glycosylase	G3DSA:3.10.300.10	G3DSA:3.10.300.10			TIGR00567	3mg: DNA-3-methyladenine glycosylase			L	L			COG2094	3-methyladenine DNA glycosylase Mpg	MF_00527	Putative 3-methyladenine DNA glycosylase.			PF02245	Methylpurine-DNA glycosylase (MPG)					SSF50486	SSF50486			----------------------------------MAPDLIGCLLIKQQPNHKPLWGVIVETEAYSESEPACHGYKKRTPKNETLFGPPGRFYIYLCYGMYYCVNVVTDKANWANGVLLRSIALPNEDERIASGPGLLAKRFGFNLEHDKYLITAEKMFWLAESTSAIKMKEVINTTRVGVSKAKDLPWRWYLQNSRSVSKRAKGDRCPPISQAWKPTLKES-----------------------
	44959	GC_00000827		MIT9215	22725	EAG	146891.A9601_02551	3-methyladenine DNA glycosylase	G3DSA:3.10.300.10	G3DSA:3.10.300.10							L	L			COG2094	3-methyladenine DNA glycosylase Mpg					PF02245	Methylpurine-DNA glycosylase (MPG)					SSF50486	SSF50486			----------------------------------------------------------------------------------------------------------------------------------------------MDKSFNSLEVLNNNSLWISQRDSSIEEKDLIQTTRIGISKAKNIKWRWYLKNSSSVSKRLKGDRTPKFQ---------------------------------
	44958	GC_00000827		MIT9301	24677	ECG	167546.P9301_02561	3-methyladenine DNA glycosylase	G3DSA:3.10.300.10	G3DSA:3.10.300.10							L	L			COG2094	3-methyladenine DNA glycosylase Mpg					PF02245	Methylpurine-DNA glycosylase (MPG)					SSF50486	SSF50486			----------------------------------------------------------------------------MTESNKSLFGKPGTFYIYKSYGIHHCLNIVTDKENLASGVLIRSVFISKKNERLASGPGLVTKTFSIDISFNSLEVLNNKSLWISPRKSNLEEKDLIQTTRIGISKAKNIKWRWYLKNSRSVSKRLKGDRTPKFQ---------------------------------
	44956	GC_00000827		MIT9302	28130	ECG	146891.A9601_02551	3-methyladenine DNA glycosylase	G3DSA:3.10.300.10	G3DSA:3.10.300.10							L	L			COG2094	3-methyladenine DNA glycosylase Mpg					PF02245	Methylpurine-DNA glycosylase (MPG)					SSF50486	SSF50486			---------------------------------------------------------------------------------------------------------MTDKENFASGVLIRAVFISKKNERLASGPGLVTKTFGVDVSFNSLEVLKNKSLWISQKDSTLEEKDLIQTTRIGISKAKNIKWRWYLKNSRSVSKRLKGDRTPKLNNHLSF----------------------------
	44939	GC_00000827		MIT9303	30388	ECG	74547.PMT1808	3-methyladenine DNA glycosylase	G3DSA:3.10.300.10	G3DSA:3.10.300.10							L	L			COG2094	3-methyladenine DNA glycosylase Mpg	MF_00527	Putative 3-methyladenine DNA glycosylase.			PF02245	Methylpurine-DNA glycosylase (MPG)					SSF50486	SSF50486			MKKVVAPATPIATTSIAKDFPPLPKSFFCRPAEVVGPELVGCRLVKRQADGSLLWGVIVETEAYSQDEPACHGYRRRSPQNETLFGEPGRFYVYVSYGIHHCVNVVTDRAEWANGVLLRAIALPDEPERVAAGPALLARRFGLDRSHDRAAVTGENDVWLAPRPAAFGTPTIVSTTRIGISQGQDIPWRWYLKNCRSISRRAKGDRTPLLQQAWAPVASDGQ----------------------
	44940	GC_00000827		MIT9303	30397	ECG	110662.Syncc9605_0291	3-methyladenine DNA glycosylase	G3DSA:3.10.300.10	G3DSA:3.10.300.10							L	L			COG2094	3-methyladenine DNA glycosylase Mpg					PF02245	Methylpurine-DNA glycosylase (MPG)					SSF50486	SSF50486			-------------------MSALPLSFFCRPAEVVGPDLIGCRLVKLQDDGSLLMGVIVETEAYSQDEPACNGYRRRSPQNETLFGEPGRFYVYVSYGIHHCVNVVTDR---------------------------------------------------------------------------------------------------------------------------------------
	44938	GC_00000827		MIT9303	30405	ECG	74547.PMT1808	3-methyladenine DNA glycosylase	G3DSA:3.10.300.10	G3DSA:3.10.300.10							L	L			COG2094	3-methyladenine DNA glycosylase Mpg	MF_00527	Putative 3-methyladenine DNA glycosylase.			PF02245	Methylpurine-DNA glycosylase (MPG)					SSF50486	SSF50486			#NAME?
	44947	GC_00000827		MIT9313	36600	ECG	221359.RS9916_39411	3-methyladenine DNA glycosylase	G3DSA:3.10.300.10	G3DSA:3.10.300.10							L	L			COG2094	3-methyladenine DNA glycosylase Mpg					PF02245	Methylpurine-DNA glycosylase (MPG)					SSF50486	SSF50486			---------------------------------MVGPELVGCRLVKRQADGRLLWGVIVETEAYSQDEPACHGYRHRSPQNETLFGEPARFYVY---------------------------------------------------AIPSALLLTN-----------------------------------------------------------------------------------------
	44946	GC_00000827		MIT9313	36813	ECG	74547.PMT1808	3-methyladenine DNA glycosylase	G3DSA:3.10.300.10	G3DSA:3.10.300.10							L	L			COG2094	3-methyladenine DNA glycosylase Mpg	MF_00527	Putative 3-methyladenine DNA glycosylase.			PF02245	Methylpurine-DNA glycosylase (MPG)					SSF50486	SSF50486			---------------------------------MVGPELVGCRLAKRQEDGSLLWGVIVETEAYSQDEPACHGYRRRSPQNETLFGEPGRFYVYVSYGIHHCVNVVTDRAEWANGVLLRAIALPDEPERVAAGPALLARRFGLDPSHDRAAVTGENDVWLATRPATFGTPTIVSTTRIGISQGQDLPWRWYLKNCRSISRRAKGDRTPPLQQAWAPVASDGQ----------------------
	44945	GC_00000827		MIT9314	38216	ECG	146891.A9601_02551	3-methyladenine DNA glycosylase	G3DSA:3.10.300.10	G3DSA:3.10.300.10			TIGR00567	3mg: DNA-3-methyladenine glycosylase			L	L			COG2094	3-methyladenine DNA glycosylase Mpg	MF_00527	Putative 3-methyladenine DNA glycosylase.			PF02245	Methylpurine-DNA glycosylase (MPG)					SSF50486	SSF50486			---------MLLDRYLKIEEEFFPKNFFYRHSKLVAPDLIGCYLTKKNNEIDQVKGVIVETEAYSQEEEACHGYRKMTESNKSLFGKPGTFYIYKSYGIHHCLNVVTDKENFASGVLIRAVFISNKNERLASGPGLVTKTFSIDISFNSLEVLNNKSLWISPRDSNLEEKDLIQTTRIGISKAKNIKWRWYLKNSRSVSKRLKGDRTPKF----------------------------------
	44950	GC_00000827		MIT9321	39955	ECG	146891.A9601_02551	3-methyladenine DNA glycosylase	G3DSA:3.10.300.10	G3DSA:3.10.300.10							L	L			COG2094	3-methyladenine DNA glycosylase Mpg					PF02245	Methylpurine-DNA glycosylase (MPG)					SSF50486	SSF50486			----------------------------------------------------------------------------MTESNKSLFGKPGTFYIYKSYGIHHCLNIVTDKENFASGVLIRSVFISNNDERLASGPGLVTKTFSIDISFNSLEVLNNKSLWISPRDSTLEEKDLIQTTRIGISKAKNIKWRWYLKNSRSVSKRLKGDRTPKFQ---------------------------------
	44943	GC_00000827		MIT9322	41719	ECG	146891.A9601_02551	3-methyladenine DNA glycosylase	G3DSA:3.10.300.10	G3DSA:3.10.300.10							L	L			COG2094	3-methyladenine DNA glycosylase Mpg					PF02245	Methylpurine-DNA glycosylase (MPG)					SSF50486	SSF50486			----------------------------------------------------------------------------MTESNKSLFGKPGTFYIYKSYGIHHCLNIVTDKENFASGVLIRSVFISNNDERLASGPGLVTKTFSIDISFNSLEVLNNKSLWISPRDSTLEEKDLIQTTRIGISKAKNIKWRWYLKNSRSVSKRLKGDRTPKFQ---------------------------------
	44961	GC_00000827		MIT9401	43465	ECG	146891.A9601_02551	3-methyladenine DNA glycosylase	G3DSA:3.10.300.10	G3DSA:3.10.300.10							L	L			COG2094	3-methyladenine DNA glycosylase Mpg					PF02245	Methylpurine-DNA glycosylase (MPG)					SSF50486	SSF50486			----------------------------------------------------------------------------MTESNKSLFGKPGTFYIYKSYGIHHCLNIVTDKENFASGVLIRSVFISNNDERLASGPGLVTKTFSIDISFNSLEVLNNKSLWISPRDSTLEEKDLIQTTRIGISKAKNIKWRWYLKNSRSVSKRLKGDRTPKFQ---------------------------------
	44944	GC_00000827		MIT9515	45166	ECG	167542.P9515_02661	3-methyladenine DNA glycosylase	G3DSA:3.10.300.10	G3DSA:3.10.300.10							L	L			COG2094	3-methyladenine DNA glycosylase Mpg	MF_00527	Putative 3-methyladenine DNA glycosylase.			PF02245	Methylpurine-DNA glycosylase (MPG)					SSF50486	SSF50486			--------------------------------------------------------MIVETEAYSQEEEACHGHKKKTPSNEVLFGEPGRFYIYRSYGIHHCLNIVTDKNNFASGVLIRAVFVSNKNERLASGPGLVTKTFEIDDKLNSLDILDNKCLWISKRESFLDKKDLIQTTRIGISKAKNIKWRWYLKRSRSISKREKGDRNPDLKKSTNNLLGIT-----------------------
	44964	GC_00000827		NATL1A	47071	ECG	167555.NATL1_03131	3-methyladenine DNA glycosylase	G3DSA:3.10.300.10	G3DSA:3.10.300.10			TIGR00567	3mg: DNA-3-methyladenine glycosylase			L	L			COG2094	3-methyladenine DNA glycosylase Mpg	MF_00527	Putative 3-methyladenine DNA glycosylase.			PF02245	Methylpurine-DNA glycosylase (MPG)					SSF50486	SSF50486			---------------------------------MVAPSLIGCFLIKRLSENSYLAGAIVETEAYSQEEASCHGFSGRTQRNKTLFGEPGNFYIYLSYGINSCVNIVTGKKNWANGVLLRSIAIKGEHERIASGPGLLAKRFGLNKNFDNLHLSPANDFWLSEGEDLTRMGNIVQTTRIGISQAKDIPWRWYLKSSRSVSKRVRGDRIPPKNKCWEPSAFEGL----------------------
	44942	GC_00000827		NATL2A	49087	ECG	167555.NATL1_03131	3-methyladenine DNA glycosylase	G3DSA:3.10.300.10	G3DSA:3.10.300.10			TIGR00567	3mg: DNA-3-methyladenine glycosylase			L	L			COG2094	3-methyladenine DNA glycosylase Mpg	MF_00527	Putative 3-methyladenine DNA glycosylase.			PF02245	Methylpurine-DNA glycosylase (MPG)					SSF50486	SSF50486			---------------------------------MVAPSLIGCFLIKRLSKNSYLAGVIVETEAYSQEEASCHGFSGRTQRNKTLFGEPGNFYIYLSYGINSCVNIVTGKKNWANGVLLRSIAIKGEHERIASGPGLLAKRFGLNKNFDNLHLSPANDFWLSEGENLTRMGNIVQTTRIGISQAKDIPWRWYLKSSRSVSKRVRGDRIPPKNKCWEPSTFEEL----------------------
	44941	GC_00000827		PAC1	51873	ECG	167555.NATL1_03131	3-methyladenine DNA glycosylase	G3DSA:3.10.300.10	G3DSA:3.10.300.10			TIGR00567	3mg: DNA-3-methyladenine glycosylase			L	L			COG2094	3-methyladenine DNA glycosylase Mpg	MF_00527	Putative 3-methyladenine DNA glycosylase.			PF02245	Methylpurine-DNA glycosylase (MPG)					SSF50486	SSF50486			---------------------------------MVAPSLIGCFLIKRLSKNSYLAGTIVETEAYSQEEASCHGFSGRTQRNKTLFGEPGNFYIYLSYGINSCVNIVTGKKNWANGVLLRSIAIKGEHERIASGPGLLAKRFGLNKNFDNLHLSPANDFWLSEGENLTRMGNIVQTTRIGISQAKDIPWRWYLKSSRSVSKRVKGDRIPPKNKCWEPSAFEGL----------------------
	44953	GC_00000827		SB	53805	EAG	146891.A9601_02551	3-methyladenine DNA glycosylase	G3DSA:3.10.300.10	G3DSA:3.10.300.10							L	L			COG2094	3-methyladenine DNA glycosylase Mpg					PF02245	Methylpurine-DNA glycosylase (MPG)					SSF50486	SSF50486			----------------------------------------------------------------------------MTESNKSLFGKPGTFYIYKSYGIHHCLNIVTDKENFASGVLIRSIFVSNKNERLASGPGLVTRTFSVDISFNSLEVLNNKFLCISPRDSTLEEKDLIQTTRIGISKAKNIKWRWYLKNSRSVSKRLKGDRTPKFQ---------------------------------
	44937	GC_00000827		SS2	56421	NA	167539.Pro0263	3-methyladenine DNA glycosylase	G3DSA:3.10.300.10	G3DSA:3.10.300.10			TIGR00567	3mg: DNA-3-methyladenine glycosylase			L	L			COG2094	3-methyladenine DNA glycosylase Mpg	MF_00527	Putative 3-methyladenine DNA glycosylase.			PF02245	Methylpurine-DNA glycosylase (MPG)					SSF50486	SSF50486			--MLDKKTWPYQFQKHQIAISSLPINFFCRPSEEVAPDLIGCLLVKRESNKKLLWGAIVETEAYSQSEPACHGFTRKTSKNKTLFGNPGRLYVYLTYGSYYCVNIVTHKKDYANGVLLRAIAIPNENERIAAGPGLLANRFGLNRSHDNSLISVENGLWIDKGLSGSKMNSIIQTKRIGISKAKDLPWRWYLQNSRSVSKRAKGDRCPSLLDAWKPSSKEGP----------------------
	44963	GC_00000827		SS35	58062	NA	167539.Pro0263	3-methyladenine DNA glycosylase	G3DSA:3.10.300.10	G3DSA:3.10.300.10			TIGR00567	3mg: DNA-3-methyladenine glycosylase			L	L			COG2094	3-methyladenine DNA glycosylase Mpg	MF_00527	Putative 3-methyladenine DNA glycosylase.			PF02245	Methylpurine-DNA glycosylase (MPG)					SSF50486	SSF50486			--MLDKKTWPYQFQKHQIAISSLPINFFCRPSEEVAPDLIGCLLVKRESNKKLLWGAIVETEAYSQSEPACHGFTRKTSKNKTLFGNPGRLYVYLTYGSYYCVNIVTHKKDYANGVLLRAIAIPNENERIAAGPGLLANRFGLNRSHDNSLISVENGLWIDKGLSGSKMNSIIQTKRIGISKAKDLPWRWYLQNSRSVSKRAKGDRCPSLLDAWKPSSKEGP----------------------
	44955	GC_00000827		SS51	59355	NA	167539.Pro0263	3-methyladenine DNA glycosylase	G3DSA:3.10.300.10	G3DSA:3.10.300.10			TIGR00567	3mg: DNA-3-methyladenine glycosylase			L	L			COG2094	3-methyladenine DNA glycosylase Mpg	MF_00527	Putative 3-methyladenine DNA glycosylase.			PF02245	Methylpurine-DNA glycosylase (MPG)					SSF50486	SSF50486			--MLDKKTWPYQFQKHQIAISSLPINFFCRPSEEVAPDLIGCLLVKRESNKKLLWGAIVETEAYSQSEPACHGFTRKTSKNKTLFGNPGRLYVYLTYGSYYCVNIVTHKKDYANGVLLRAIAIPNENERIAAGPGLLANRFGLNRSHDNSLISVENGLWIDKGLSGSKMNSIIQTKRIGISKAKDLPWRWYLQNSRSVSKRAKGDRCPSLLDAWKPSSKEGP----------------------
	56424	GC_00001766	LL Core	CCMP1375	2816	NA	167539.Pro0989	3-octaprenyl-4-hydroxybenzoate carboxy-lyase	G3DSA:3.40.50.1950	G3DSA:3.40.50.1950			TIGR00421	ubiX_pad: polyprenyl P-hydroxybenzoate and phenylacrylic acid decarboxylases			H	H			COG0163	3-polyprenyl-4-hydroxybenzoate decarboxylase	MF_01984	Flavin prenyltransferase UbiX [ubiX].			PF02441	Flavoprotein					SSF52507	SSF52507			MSSIVLAITGASAQILAERSIDLLLRCNQKLDVIISKGAYEVWKSEMNVNIPAEGAKQATFWRNRLKNNQGEIICHKWNDNSATIASGSFRTKGMVIVPCSMGTIGRIASGSSINLIERCADVHLKEGRPLIISPRESPFNLIHLRNMTTLCEAGAKIIPCIPAWYSKPKDLEEVIDFMVVRLYDLFDLNMKDINRWKGN--
	56419	GC_00001766	LL Core	LG	7697	NA	167539.Pro0989	3-octaprenyl-4-hydroxybenzoate carboxy-lyase	G3DSA:3.40.50.1950	G3DSA:3.40.50.1950			TIGR00421	ubiX_pad: polyprenyl P-hydroxybenzoate and phenylacrylic acid decarboxylases			H	H			COG0163	3-polyprenyl-4-hydroxybenzoate decarboxylase	MF_01984	Flavin prenyltransferase UbiX [ubiX].			PF02441	Flavoprotein					SSF52507	SSF52507			MSSIVLAITGASAQILAERSIDLLLRCNQKLDVIISKGAYEVWKSEMNVNIPAEGAKQATFWRNRLKNNQGEIICHKWNDNSATIASGSFRTKGMVIVPCSMGTIGRIASGSSINLIERCADVHLKEGRPLIISPRESPFNLIHLRNMTTLCEAGAKIIPCIPAWYSKPKDLEEVIDFMVVRLYDLFDLNMKDINRWKGN--
	56421	GC_00001766	LL Core	MIT9211	21595	NA	93059.P9211_09161	3-octaprenyl-4-hydroxybenzoate carboxy-lyase	G3DSA:3.40.50.1950	G3DSA:3.40.50.1950			TIGR00421	ubiX_pad: polyprenyl P-hydroxybenzoate and phenylacrylic acid decarboxylases			H	H			COG0163	3-polyprenyl-4-hydroxybenzoate decarboxylase	MF_01984	Flavin prenyltransferase UbiX [ubiX].			PF02441	Flavoprotein					SSF52507	SSF52507			MTKIVLAVTGASAQPIAERSLELLLKNNLEVHLILSKGAYKVWDAEANTKIPFDPASQEKFWRNRLKINSGKLNCYKWNDNSASIASGSVHTDGMIIVPCTMGTIGRISNGFALDLIERCADVHLKELRKLVISPRESPFNLIHLRNMTKLAEAGAHIVPCIPAWYGSPNSLEDMINFLVVRLFDSFNLDLLKIKRWKDY--
	56415	GC_00001766	LL Core	MIT9303	29527	ECG	74547.PMT0767	3-octaprenyl-4-hydroxybenzoate carboxy-lyase	G3DSA:3.40.50.1950	G3DSA:3.40.50.1950			TIGR00421	ubiX_pad: polyprenyl P-hydroxybenzoate and phenylacrylic acid decarboxylases			H	H			COG0163	3-polyprenyl-4-hydroxybenzoate decarboxylase	MF_01984	Flavin prenyltransferase UbiX [ubiX].			PF02441	Flavoprotein					SSF52507	SSF52507			MDPYVLAVSGASAQPLAERSLQLLLENNRDVHLIFSHGALQVWKAERGIEVPMDPSDQEKFWRDHLQVKNGNLTCHRWNDQSACIASGSFRTRGMAIVPCSMGTIGRINAGVSIDLIERCADVHLKEGRPLVIAPRDMPWSIIHLRNLTSLAEAGAKIAPPIPAWYTKPNTIEEMVDFLVVRLFDLFDERLAPINRWNGPSQ
	56418	GC_00001766	LL Core	MIT9313	35610	ECG	74547.PMT0767	3-octaprenyl-4-hydroxybenzoate carboxy-lyase	G3DSA:3.40.50.1950	G3DSA:3.40.50.1950			TIGR00421	ubiX_pad: polyprenyl P-hydroxybenzoate and phenylacrylic acid decarboxylases			H	H			COG0163	3-polyprenyl-4-hydroxybenzoate decarboxylase	MF_01984	Flavin prenyltransferase UbiX [ubiX].			PF02441	Flavoprotein					SSF52507	SSF52507			MDPYVLAVSGASAQPLAERSLQLLLENNRDVHLIFSHGALQVWKAERGIEVPVDPSDQEKFWRDHLQVKNGNLTCHRWNDQSACIASGSFRTRGMAIVPCSMGTIGRINAGVSIDLIERCADVHLKEGRPLVIAPRDMPWSIIHLRNLTSLAEAGAKIAPPIPAWYTKPNTIEEMVDFLVVRLFDLFDERLAPINRWNGPSQ
	56423	GC_00001766	LL Core	NATL1A	47769	ECG	167555.NATL1_10431	3-octaprenyl-4-hydroxybenzoate carboxy-lyase	G3DSA:3.40.50.1950	G3DSA:3.40.50.1950			TIGR00421	ubiX_pad: polyprenyl P-hydroxybenzoate and phenylacrylic acid decarboxylases			H	H			COG0163	3-polyprenyl-4-hydroxybenzoate decarboxylase	MF_01984	Flavin prenyltransferase UbiX [ubiX].			PF02441	Flavoprotein					SSF52507	SSF52507			MKSIVIAITGASAMQIAERSIQVLLENDQSVDLILSKGSYEVAKSERGINIPVEPNAQEKFWRKKLEVKSGKLTCYRWNDHSASIASGSHKTKGMVIVPCSMGTLGRIASGVSLDLIERCADVHLKENRRLIISPRESPLSLIHIENMKRIAIAGASIVPPIPAWYTNPQTIEDIIDFIVVRLFDSLGEDLNYIKRWNGPIK
	56417	GC_00001766	LL Core	NATL2A	49753	ECG	167555.NATL1_10431	3-octaprenyl-4-hydroxybenzoate carboxy-lyase	G3DSA:3.40.50.1950	G3DSA:3.40.50.1950			TIGR00421	ubiX_pad: polyprenyl P-hydroxybenzoate and phenylacrylic acid decarboxylases			H	H			COG0163	3-polyprenyl-4-hydroxybenzoate decarboxylase	MF_01984	Flavin prenyltransferase UbiX [ubiX].			PF02441	Flavoprotein					SSF52507	SSF52507			MKSIVIAITGASAMQIAERSIQVLLENDQSVDLILSKGSYEVAKSERGINIPVEPNTQEKFWRKKLEVQSGKLTCYRWNDHSASIASGSHKTKGMVIVPCSMGTLGRIASGFSLDLIERCADVHLKENRRLIISPRESPLSLIHIENMKRLAIAGASIVPPIPAWYTNPRTIEDIIDFIVVRLFDSLGEDLNYIKRWNGPIK
	56416	GC_00001766	LL Core	PAC1	52752	ECG	167555.NATL1_10431	3-octaprenyl-4-hydroxybenzoate carboxy-lyase	G3DSA:3.40.50.1950	G3DSA:3.40.50.1950			TIGR00421	ubiX_pad: polyprenyl P-hydroxybenzoate and phenylacrylic acid decarboxylases			H	H			COG0163	3-polyprenyl-4-hydroxybenzoate decarboxylase	MF_01984	Flavin prenyltransferase UbiX [ubiX].			PF02441	Flavoprotein					SSF52507	SSF52507			MKSIVIAITGASAMQIAERSIQVLLENDQSVDLILSKGSYEVAKSERGINIPVEPNAQEKFWRKKLEVKSGKLTCYRWNDHSASIASGSHKTKGMVIVPCSMGTLGRIASGFSLDLIERCADVHLKENRRLIISPRESPLSLIHIENMKRLAIAGASIVPPIPAWYTNPRTIEDIIDFIVVRLFDSLGEDLNYIKRWNGPIK
	56414	GC_00001766	LL Core	SS2	56022	NA	167539.Pro0989	3-octaprenyl-4-hydroxybenzoate carboxy-lyase	G3DSA:3.40.50.1950	G3DSA:3.40.50.1950			TIGR00421	ubiX_pad: polyprenyl P-hydroxybenzoate and phenylacrylic acid decarboxylases			H	H			COG0163	3-polyprenyl-4-hydroxybenzoate decarboxylase	MF_01984	Flavin prenyltransferase UbiX [ubiX].			PF02441	Flavoprotein					SSF52507	SSF52507			MSSIVLAITGASAQILAERSIDLLLRCNQKLDVIISKGAYEVWKSEMNVNIPAEGAKQATFWRNRLKNNQGEIICHKWNDNSATIASGSFRTKGMVIVPCSMGTIGRIASGSSINLIERCADVHLKEGRPLIISPRESPFNLIHLRNMTTLCEAGAKIIPCIPAWYSKPKDLEEVIDFMVVRLYDLFDLNMKDINRWKGN--
	56422	GC_00001766	LL Core	SS35	57565	NA	167539.Pro0989	3-octaprenyl-4-hydroxybenzoate carboxy-lyase	G3DSA:3.40.50.1950	G3DSA:3.40.50.1950			TIGR00421	ubiX_pad: polyprenyl P-hydroxybenzoate and phenylacrylic acid decarboxylases			H	H			COG0163	3-polyprenyl-4-hydroxybenzoate decarboxylase	MF_01984	Flavin prenyltransferase UbiX [ubiX].			PF02441	Flavoprotein					SSF52507	SSF52507			MSSIVLAITGASAQILAERSIDLLLRCNQKLDVIISKGAYEVWKSEMNVNIPAEGAKQATFWRNRLKNNQGEIICHKWNDNSATIASGSFRTKGMVIVPCSMGTIGRIASGSSINLIERCADVHLKEGRPLIISPRESPFNLIHLRNMTTLCEAGAKIIPCIPAWYSKPKDLEEVIDFMVVRLYDLFDLNMKDINRWKGN--
	56420	GC_00001766	LL Core	SS51	59639	NA	167539.Pro0989	3-octaprenyl-4-hydroxybenzoate carboxy-lyase	G3DSA:3.40.50.1950	G3DSA:3.40.50.1950			TIGR00421	ubiX_pad: polyprenyl P-hydroxybenzoate and phenylacrylic acid decarboxylases			H	H			COG0163	3-polyprenyl-4-hydroxybenzoate decarboxylase	MF_01984	Flavin prenyltransferase UbiX [ubiX].			PF02441	Flavoprotein					SSF52507	SSF52507			MSSIVLAITGASAQILAERSIDLLLRCNQKLDVIISKGAYEVWKSEMNVNIPAEGAKQATFWRNRLKNNQGEIICHKWNDNSATIASGSFRTKGMVIVPCSMGTIGRIASGSSINLIERCADVHLKEGRPLIISPRESPFNLIHLRNMTTLCEAGAKIIPCIPAWYSKPKDLEEVIDFMVVRLYDLFDLNMKDINRWKGN--
	37304	GC_00001302	HL Core	AS9601	1341	ECG	146891.A9601_13851	3'-phosphoadenosine 5'-phosphosulfate 3'-phosphatase	G3DSA:3.30.540.10	G3DSA:3.30.540.10	PR00377	Inositol monophosphatase superfamily signature					P	P			COG1218	3'-Phosphoadenosine 5'-phosphosulfate (PAPS) 3'-phosphatase					PF00459	Inositol monophosphatase family					SSF56655	SSF56655			MIELPSGVDINNLIDDIRIFSWQAADVLLYYSRLLENSDDKRNIVKNNNEDDPVTLADLKVNELIIERINEKYKNINWDILSEENVKNSSEIFDNKTDWIWVLDPLDGTKDFIQGTGNYAMHLALNFKQKPYIGFVLIPDKNQLWITDGKKTWCEKRDGKKY-KLSLSNKKNLQEMTVVTSKNHGNEILRNLIQKINFRKVEIMGSIGCKIASIVRGDSDIYICLSLPGKSSPKDWDFAAPETILKAAGGAITNLDNQELSYGKSSFEQGGIIIATNDKKTHGNICLEIKKIIEDYGIYPL---
	37316	GC_00001302	HL Core	EQPAC1	4492	EAG	59919.PMM1192	3'-phosphoadenosine 5'-phosphosulfate 3'-phosphatase	G3DSA:3.40.190.80	G3DSA:3.40.190.80	PR00377	Inositol monophosphatase superfamily signature					P	P			COG1218	3'-Phosphoadenosine 5'-phosphosulfate (PAPS) 3'-phosphatase					PF00459	Inositol monophosphatase family					SSF56655	SSF56655	PS00630	Inositol monophosphatase family signature 2.	MIKLPSGVYLENLIDDLRAFSWEAYETLIYYSKIVKDSNNKSNILKNDNLDDPVTKADLKVNEVIIKRINEKYKDINWEILSEENVKLTSESCNNNADWIWVLDPLDGTKDFIQGTGNYAMHLALNYKNKPYIGIVLIPDKDELWITDGEKVWGEKKDGSKI-KPNLSTNKSLKDMSLVTSKNHRNEIIKKLIQKIDFYKVITMGSIGCKIASIIRGESDIYISLSLMGKSSPKDWDFAAPEAILKTAGGVITNLDNQELIYGKSNFEQGGIIVASSNIDTHKDICTEIKEIIKKYDIYPLRIN
	37305	GC_00001302	HL Core	GP2	6783	EAG	74546.PMT9312_1293	3'-phosphoadenosine 5'-phosphosulfate 3'-phosphatase	G3DSA:3.30.540.10	G3DSA:3.30.540.10	PR00377	Inositol monophosphatase superfamily signature					P	P			COG1218	3'-Phosphoadenosine 5'-phosphosulfate (PAPS) 3'-phosphatase					PF00459	Inositol monophosphatase family					SSF56655	SSF56655	PS00630	Inositol monophosphatase family signature 2.	MVKVPFCVDTDKLISDLKIISWEAADILLYYSKEIKDIKQKNKIVRNKGLNDPVTLADLKVNELIIKKIRENYSDFEYSILSEENVNLLSNSLCSNCDWLWVLDPLDGTKDFIQGTGNYAMHLALNYKNKPYLGFVLIPSKNELWIANGVQVWGERKDGVIL-KSKLSQEKNLKDMTIITSKNHRNETLECLINTINFKEKIVMGSIGCKIASIVKGDADIYISLSLPGASSPKDWDFAAPEAILNAAGGAITFIDNKEISYNQENFEQPGIIVASNNKLNHGRICSEIIEIIRNNNLYPI---
	37310	GC_00001302	HL Core	MED4	10577	EAG	59919.PMM1192	3'-phosphoadenosine 5'-phosphosulfate 3'-phosphatase	G3DSA:3.40.190.80	G3DSA:3.40.190.80	PR00377	Inositol monophosphatase superfamily signature					P	P			COG1218	3'-Phosphoadenosine 5'-phosphosulfate (PAPS) 3'-phosphatase					PF00459	Inositol monophosphatase family					SSF56655	SSF56655	PS00630	Inositol monophosphatase family signature 2.	MIKLPSGVYLENLIDDLRAFSWEAYETLIYYSKIVKDSNNKSNILKNDNLDDPVTKADLKVNEVIIKRINEKYKDINWEILSEENVKLTSESCNNNADWIWVLDPLDGTKDFIQGTGNYAMHLALNYKNKPYIGIVLIPDKDELWITDGEKVWGEKKDGSKI-KPNLSTNKSLKDMSLVTSKNHRNEIIKKLIQKIDFYKVITMGSIGCKIASIIRGESDIYISLSLMGKSSPKDWDFAAPEAILKTAGGVITNLDNQELIYGKSNFEQGGIIVASSNINTHKDICTEIKEIIKKYDIYPLRIN
	37303	GC_00001302	HL Core	MIT9107	11371	EAG	59919.PMM1192	3'-phosphoadenosine 5'-phosphosulfate 3'-phosphatase	G3DSA:3.30.540.10	G3DSA:3.30.540.10	PR00377	Inositol monophosphatase superfamily signature					P	P			COG1218	3'-Phosphoadenosine 5'-phosphosulfate (PAPS) 3'-phosphatase					PF00459	Inositol monophosphatase family					SSF56655	SSF56655			MIKLPSGVEIKDLIDDLKLFSWEASEILLYYSQILKDSSNKSNIIKNNNIEDPVTLADLNVNKLIIQRINEKYKDIGWKILSEENVKMESGYCDLNSDWVWVLDPLDGTKDFIQGTENYAMHLALNYKQSPYLGVVLIPERDELWIADGEKVWCENRGSQKV-ISCNSISKDLKEMVIVTSKNHRNLNLNKLIKKVGFKEVKIMGSIGCKIASIIRGESDIYICLSLPDRSSPKDWDFSAPEAILKAAGGAITNLENKSLSYGKKDFAQEGIIIASNNKLTHKKVCFEIRQIIKRYDLYPL---
	37302	GC_00001302	HL Core	MIT9116	13254	EAG	59919.PMM1192	3'-phosphoadenosine 5'-phosphosulfate 3'-phosphatase	G3DSA:3.30.540.10	G3DSA:3.30.540.10	PR00377	Inositol monophosphatase superfamily signature					P	P			COG1218	3'-Phosphoadenosine 5'-phosphosulfate (PAPS) 3'-phosphatase					PF00459	Inositol monophosphatase family					SSF56655	SSF56655			MIKLPSGVEIKDLIDDLKLFSWEASEILLYYSQILKDSSNKSNIIKNNNIEDPVTLADLNVNKLIIQRINEKYKDIGWKILSEENVKMESGYCDLNSDWVWVLDPLDGTKDFIQGTENYAMHLALNYKQSPYLGVVLIPERDELWIADGEKVWCENRGSQKV-ISCNSISKDLKEMVIVTSKNHRNLNLNKLIKKVGFKEVKIMGSIGCKIASIIRGESDIYICLSLPDRSSPKDWDFSAPEAILKAAGGAITNLENKSLSYGKKDFAQEGIIIASNNKLTHKKVCFEIRQIIKRYDLYPL---
	37306	GC_00001302	HL Core	MIT9123	15858	EAG	59919.PMM1192	3'-phosphoadenosine 5'-phosphosulfate 3'-phosphatase	G3DSA:3.30.540.10	G3DSA:3.30.540.10	PR00377	Inositol monophosphatase superfamily signature					P	P			COG1218	3'-Phosphoadenosine 5'-phosphosulfate (PAPS) 3'-phosphatase					PF00459	Inositol monophosphatase family					SSF56655	SSF56655			MIKLPSGVEIKDLIDDLKLFSWEASEILLYYSQILKDSSNKSNIIKNNNIEDPVTLADLNVNKLIIQRINEKYKDIGWKILSEENVKMESGYCDLNSDWVWVLDPLDGTKDFIQGTENYAMHLALNYKQSPYLGVVLIPERDELWIADGEKVWCENRGSQKV-ISCNSISKDLKEMVIVTSKNHRNLNLNKLIKKVGFKEVKIMGSIGCKIASIIRGESDIYICLSLPDRSSPKDWDFSAPEAILKAAGGAITNLENKSLSYGKKDFAQEGIIIASNNKLTHKKVCFEIRQIIKRYDLYPL---
	37308	GC_00001302	HL Core	MIT9201	17449	EAG	59919.PMM1192	3'-phosphoadenosine 5'-phosphosulfate 3'-phosphatase	G3DSA:3.30.540.10	G3DSA:3.30.540.10	PR00377	Inositol monophosphatase superfamily signature					P	P			COG1218	3'-Phosphoadenosine 5'-phosphosulfate (PAPS) 3'-phosphatase					PF00459	Inositol monophosphatase family					SSF56655	SSF56655	PS00630	Inositol monophosphatase family signature 2.	MIKLPSGIDINNLIDDLRRFSWEAAETLLFYSKILRDSDYKSNILKNGNIEDPVTSADLKVNEIIIQRINEKYKDIDWDILSEENVKGVTQNFTSNSDWVWVLDPLDGTKDFIQGTSNYAMHLALNYKKKPFLGIVLIPEKDELWISNGENVWCENRCGSIIGKPALYKIKSLNEMTLVTSKNHRNEILKNLIKKINFNEVIIMGSIGCKIASIVRGESDIYICLSLPGKSSPKDWDFAAPAAILKGAGGAITNLDNQELLYFKPSFEQGGVIVASNNYSTHHKICFEIKQIIKKYNLYPLTA-
	37313	GC_00001302	HL Core	MIT9202	19073	ECG	146891.A9601_13851	3'-phosphoadenosine 5'-phosphosulfate 3'-phosphatase	G3DSA:3.40.190.80	G3DSA:3.40.190.80	PR00377	Inositol monophosphatase superfamily signature					P	P			COG1218	3'-Phosphoadenosine 5'-phosphosulfate (PAPS) 3'-phosphatase					PF00459	Inositol monophosphatase family					SSF56655	SSF56655			MIELPSGVDINNLIDDIRIFSWQAADILLYYSRLLENSDDKRNIIKNNNEDAPVTLADLKVNELIIKKINEKYKNINWDILSEENVKISSKIFNSKTDWIWVLDPLDGTKDFIQGTGNYAMHLALNFKQKPFIGFVLIPDKNQLWITDGKETWCEKRDGTKY-RPNLTNNKKLKEMTLVTSKNHGNEILRNLIRKINFRKVKIMGSIGCKIASIIRGDSDIYICLSLPDKSSPKDWDFAAPESILKAAGGSITNLDNQELLYGETSFEHGGIIVATNDKENHGSICLEIKKIIEEYGIYPL---
	37315	GC_00001302	HL Core	MIT9215	23848	ECG	93060.P9215_14061	3'-phosphoadenosine 5'-phosphosulfate 3'-phosphatase	G3DSA:3.30.540.10	G3DSA:3.30.540.10	PR00377	Inositol monophosphatase superfamily signature					P	P			COG1218	3'-Phosphoadenosine 5'-phosphosulfate (PAPS) 3'-phosphatase					PF00459	Inositol monophosphatase family					SSF56655	SSF56655			MIKLPSGVDINNLIDDIRIFSWQAADILLYYSKLLEDSDGKRNILKNNNVNDPVTVADLKVNELIIKRINEKYKNINWDILSEENVKISSKGFDSKTDWIWVLDPLDGTKDFIQGTGNYAMHLALNFKQKTYIGFVLIPNKNQLWITDGKKTWCEKRDGTRY-KPNLLKKNNLQEMTLVTSKNHGNEILKNLIQKINFRKVEIMGSIGCKIASIIRGDSDIYICLSLPGKSSPKDWDFAAPESILKAAGGAVTNLDNQELTYGQTSFQQSGVIVATSNKDTHGSICLQIKKIIEDNAIYPL---
	37314	GC_00001302	HL Core	MIT9301	25767	EAG	167546.P9301_13931	3'-phosphoadenosine 5'-phosphosulfate 3'-phosphatase	G3DSA:3.30.540.10	G3DSA:3.30.540.10	PR00377	Inositol monophosphatase superfamily signature					P	P			COG1218	3'-Phosphoadenosine 5'-phosphosulfate (PAPS) 3'-phosphatase					PF00459	Inositol monophosphatase family					SSF56655	SSF56655	PS00630	Inositol monophosphatase family signature 2.	MIKLPSGIELQNLIDNLRILSWEASEKLTYYAQIVKDSNGKRNILRNDNFEDPVTLADISVNEIVINKINQLYKDVNWKILSEENVKSGPYNPNINQDWVWILDPLDGTKDFIQGTTNYAMHLALNYKKRPLIGIVLIPERDELWFAVGCELWCENRNGVRI-KPKPLKRKSLQEMSLVTSKNHGNTTLNKLIKKINFKEVIIMGSIGCKIASIVRRDSDIYICLSLPGMSSPKDWDFAAPEAILKASGGNITTLDNKDLIYGKSNFEQGGIIVASNNINNHKNICSEIEEIIREGDLFPL---
	37312	GC_00001302	HL Core	MIT9302	27727	ECG	74546.PMT9312_1293	3'-phosphoadenosine 5'-phosphosulfate 3'-phosphatase	G3DSA:3.40.190.80	G3DSA:3.40.190.80	PR00377	Inositol monophosphatase superfamily signature					P	P			COG1218	3'-Phosphoadenosine 5'-phosphosulfate (PAPS) 3'-phosphatase					PF00459	Inositol monophosphatase family					SSF56655	SSF56655	PS00630	Inositol monophosphatase family signature 2.	MIKLPSGVEINNLIDNLRIFSWEAADILLYYANSIKNLDQKNEILKNKNNNDPVTLADLEVNELIINRINQKYQDTNWDILSEENFKIESNFSN-NVDWLWVLDPLDGTKDFIQGTQNYAMHLALNYKRKPYIGVVLIPEKDELWISFAEKLWCENRDGNIR-KQNLSDTNILKEMTIVTSKNHKNEKLKDLIEKINFKKTIVMGSIGCKVASIIRGDSDIYIALSLPGKTAPKDWDFAAPEAILKAAGGSITNVDNEDLVYGRTDLKHSGIIIASNNKENHKRICSEVKAIIEEYNIYP----
	37318	GC_00001302	HL Core	MIT9311	31953	ECG	74546.PMT9312_1293	3'-phosphoadenosine 5'-phosphosulfate 3'-phosphatase	G3DSA:3.40.190.80	G3DSA:3.40.190.80	PR00377	Inositol monophosphatase superfamily signature			Coil	Coil	P	P			COG1218	3'-Phosphoadenosine 5'-phosphosulfate (PAPS) 3'-phosphatase					PF00459	Inositol monophosphatase family					SSF56655	SSF56655	PS00630	Inositol monophosphatase family signature 2.	MIKLPFGVEINNLIDNLKSLSWEAADILLYYANIIKKLEQKNEILKNKNNNDPVTLADLEVNELIINRINQKYQDTNWEILSEENFKIESNYFN-NVDWLWVLDPLDGTKDFIQGTQNYAMHLALNYKRRPFIGVVLIPEKDELWISYAEKLWCEKRDGSIR-KQNLSETDILKDMTIVTSKNHRNEKLKDLIEKINFKKTIVMGSIGCKVASIIRGDSDIYIALSLPGKSAPKDWDFAAPEAILKAAGGSITNIDNEDLVYGSTDLKHSGIIIASNNKKNHKRICSQVKEIIEEYKIYP----
	37309	GC_00001302	HL Core	MIT9312	34222	ECG	74546.PMT9312_1293	3'-phosphoadenosine 5'-phosphosulfate 3'-phosphatase	G3DSA:3.40.190.80	G3DSA:3.40.190.80	PR00377	Inositol monophosphatase superfamily signature			Coil	Coil	P	P			COG1218	3'-Phosphoadenosine 5'-phosphosulfate (PAPS) 3'-phosphatase					PF00459	Inositol monophosphatase family					SSF56655	SSF56655	PS00630	Inositol monophosphatase family signature 2.	MIKLPFGVEINNLIDNLKSLSWEAADILLYYANIIKKLEQKNEILKNKNNNDPVTLADLEVNELIINRINQKYQDTNWEILSEENFKIESNYFN-NVDWLWVLDPLDGTKDFIQGTQNYAMHLALNYKRRPFIGVVLIPEKDELWISYAEKLWCEKRDGSIR-KQNLSETDILKDMTIVTSKNHRNEKLKDLIEKINFKKTIVMGSIGCKVASIIRGDSDIYIALSLPGKSAPKDWDFAAPEAILKAAGGSITNIDNEDLVYGSTDLKHSGIIIASNNKKNHKRICSQVKEIIEEYKIYP----
	37301	GC_00001302	HL Core	MIT9314	39120	EAG	146891.A9601_13851	3'-phosphoadenosine 5'-phosphosulfate 3'-phosphatase	G3DSA:3.30.540.10	G3DSA:3.30.540.10	PR00377	Inositol monophosphatase superfamily signature					P	P			COG1218	3'-Phosphoadenosine 5'-phosphosulfate (PAPS) 3'-phosphatase					PF00459	Inositol monophosphatase family					SSF56655	SSF56655			MIKLPSGLEINNLIDDLKVFSWEASEILLYYSQILKDSCNNSNIIKNNNIEDPVTLADLEVNKLIIQRINGKYKDIGWAILSEENVKIKPHSCDINSDWIWVLDPLDGTKDFIQGTNNYAMHLALNYKQRPYLGVVLIPEKDELWISDGEKTWCEMKNSTTS-GTNLSRSKNLKEMIIVTSKNHGNANLHNLIEKVGFKDVKVMGSIGCKISSILRGESDIYISLSLPGKSSPKDWDFSAPEAVLKAAGGAITNLENEPLSYGEKDFEQKGIIIASNNKLTHKKVCFDIKEIIKKYDLYPL---
	37307	GC_00001302	HL Core	MIT9321	41004	EAG	74546.PMT9312_1293	3'-phosphoadenosine 5'-phosphosulfate 3'-phosphatase	G3DSA:3.30.540.10	G3DSA:3.30.540.10	PR00377	Inositol monophosphatase superfamily signature					P	P			COG1218	3'-Phosphoadenosine 5'-phosphosulfate (PAPS) 3'-phosphatase					PF00459	Inositol monophosphatase family					SSF56655	SSF56655	PS00630	Inositol monophosphatase family signature 2.	MIKLPIGVDIINLIEDLRIISWEAAEILLFYSKKIKDINKKNNIIKNSNNDDPVTLADLEVNQLIIRRIKEKYKNISWEILSEENVKINSSSCNTYSEWLWVLDPLDGTKDFIQGTKDFAMHLALNYKQKPLIGVVLIPERGELWISDGTTLYCENKEGINK-KINISKKRIIKDMSVVTSKNHRNEILKDLIYKANFKKINVMGSIGCKVASILRGDSDIYISLSLPGQSSPKDWDFAAPEAILKAAGGAITTINNKELVYNSKSFEHPGIIIASNNKNNHRNVCLQIKEIIEKYDICSI---
	37299	GC_00001302	HL Core	MIT9322	42216	EAG	74546.PMT9312_1293	3'-phosphoadenosine 5'-phosphosulfate 3'-phosphatase	G3DSA:3.30.540.10	G3DSA:3.30.540.10	PR00377	Inositol monophosphatase superfamily signature					P	P			COG1218	3'-Phosphoadenosine 5'-phosphosulfate (PAPS) 3'-phosphatase					PF00459	Inositol monophosphatase family					SSF56655	SSF56655	PS00630	Inositol monophosphatase family signature 2.	MIKLPIGVDIINLIEDLRIISWEAAEILLFYSKKIKDINKKNNIIKNSNNDDPVTLADLEVNQLIIRRIKEKYKNISWEILSEENVKINSSSCNTYSEWLWVLDPLDGTKDFIQGTKDFAMHLALNYKQKPLIGVVLIPERGELWISDGTTLYCENKEGINK-KINISKKRIIKDMSVVTSKNHRNEILKDLIYKANFKKINVMGSIGCKVASILRGDSDIYISLSLPGQSSPKDWDFAAPEAILKAAGGAITTINNKELVYNSKSFEHPGIIIASNNKNNHRNVCLQIKEIIEKYDICSI---
	37317	GC_00001302	HL Core	MIT9401	43184	EAG	74546.PMT9312_1293	3'-phosphoadenosine 5'-phosphosulfate 3'-phosphatase	G3DSA:3.30.540.10	G3DSA:3.30.540.10	PR00377	Inositol monophosphatase superfamily signature					P	P			COG1218	3'-Phosphoadenosine 5'-phosphosulfate (PAPS) 3'-phosphatase					PF00459	Inositol monophosphatase family					SSF56655	SSF56655	PS00630	Inositol monophosphatase family signature 2.	MIKLPIGVDIINLIEDLRIISWEAAEILLFYSKKIKDINKKNNIIKNSNNDDPVTLADLEVNQLIIRRIKEKYKNISWEILSEENVKINSSSCNTYSEWLWVLDPLDGTKDFIQGTKDFAMHLALNYKQKPLIGVVLIPERGELWISDGTTLYCENKEGINK-KINISKKRIIKDMSVVTSKNHRNEILKDLIYKANFKKINVMGSIGCKVASILRGDSDIYISLSLPGQSSPKDWDFAAPEAILKAAGGAITTINNKELVYNSKSFEHPGIIIASNNKNNHRNVCLQIKEIIEKYDICSI---
	37300	GC_00001302	HL Core	MIT9515	46242	ECG	59919.PMM1192	3'-phosphoadenosine 5'-phosphosulfate 3'-phosphatase	G3DSA:3.30.540.10	G3DSA:3.30.540.10	PR00377	Inositol monophosphatase superfamily signature					P	P			COG1218	3'-Phosphoadenosine 5'-phosphosulfate (PAPS) 3'-phosphatase					PF00459	Inositol monophosphatase family					SSF56655	SSF56655	PS00630	Inositol monophosphatase family signature 2.	MVKLPEGVDINNLIDDLRIFSWEAADILLQYSQILKKSDYKKNILKNGNEKDPVTKADLDVNDLILKRMQSKYPSIGWKYLSEENAKADPNNCDINSDWVWILDPLDGTKDFLQGTDNYAMHFALNFKNKPFLGVVLIPERDELWISNGVNVWCDRRQHINL-KLNSFPNKSLCEMTLVTSKNHSNPTLMNLIDKICFKNVVTMGSIGCKIASIIRGESDIYISLSLPDKSSPKDWDFAAPEVILKTAGGAVTNLENEELCYEKANFDQAGIIIASNNKNMHSKICFQIKEIIKKYDIYPFIT-
	37311	GC_00001302	HL Core	SB	54537	EAG	93060.P9215_14061	3'-phosphoadenosine 5'-phosphosulfate 3'-phosphatase	G3DSA:3.40.190.80	G3DSA:3.40.190.80	PR00377	Inositol monophosphatase superfamily signature					P	P			COG1218	3'-Phosphoadenosine 5'-phosphosulfate (PAPS) 3'-phosphatase					PF00459	Inositol monophosphatase family					SSF56655	SSF56655			MVNLPSGVDINNLIDDLRIFSWEAADILLYYSKLLEDSQAKRNILQNNNENDPVTLADLKVNELIIKRINEKYKNINWDILSEENVKTSNNFVTKN-DWIWVFDPLDGTKDFIQGTGNYAMHLALNFKQKPYLGFVLIPEKNQLWITDGEKTWCEKRDGSKH-KPNLLNNKNLKDMTLVTSKNHRNEILRKLIQKINFCKVEIMGSIGCKIASIVNGESDIYICLSLLGKSSPKDWDFAAPESILKAAGGAITNLNNQELTYGQKSFHQGGVIVATGNRNTHESICLEIKKIIDDNGIYPL---
	42123	GC_00001825	LL Core	CCMP1375	3129	NA	167539.Pro1308	3'-phosphoadenosine 5'-phosphosulfate 3'-phosphatase	G3DSA:3.30.540.10	G3DSA:3.30.540.10	PR00377	Inositol monophosphatase superfamily signature					P	P			COG1218	3'-Phosphoadenosine 5'-phosphosulfate (PAPS) 3'-phosphatase					PF00459	Inositol monophosphatase family					SSF56655	SSF56655	PS00630	Inositol monophosphatase family signature 2.	-MKKEVELPNGVNLNNLLEKLRELSWGAADILKAYARGEKPPYDFPEVLSVQEGGDGPVSAADLAVNSWLIEGLKASFASVKWALISEETAKEQLVIGEPLNNQWVWILDPLDGTKDFLQGTGEYAVHLALVNGNNPVLGVVLIPELEELWIGLVGSGSWCEDRFGNKKPAVFSSRKEISEMTLVASRSHRDEKLEKLINSLPFAQKQIVGSVGCKVAKILKGEADFYISLSAKTAPKDWDMAAPEAVLKAAGGSFTHANNKPLKYNTGEINQWGCLIASHGRNHDLLCSVIQNELLSIDPSFSV
	42118	GC_00001825	LL Core	LG	7482	NA	167539.Pro1308	3'-phosphoadenosine 5'-phosphosulfate 3'-phosphatase	G3DSA:3.30.540.10	G3DSA:3.30.540.10	PR00377	Inositol monophosphatase superfamily signature					P	P			COG1218	3'-Phosphoadenosine 5'-phosphosulfate (PAPS) 3'-phosphatase					PF00459	Inositol monophosphatase family					SSF56655	SSF56655	PS00630	Inositol monophosphatase family signature 2.	-MKKEVELPNGVNLNNLLEKLRELSWGAADILKAYARGEKPPYDFPEVLSVQEGGDGPVSAADLAVNSWLIEGLKASFASVKWALISEETAKEQLVIGEPLNNQWVWILDPLDGTKDFLQGTGEYAVHLALVNGNNPVLGVVLIPELEELWIGLVGSGSWCEDRFGNKKPAVFSSRKEISEMTLVASRSHRDEKLEKLINSLPFAQKQIVGSVGCKVAKILKGEADFYISLSAKTAPKDWDMAAPEAVLKAAGGSFTHANNKPLKYNTGEINQWGCLIASHGRNHDLLCSVIQNELLSIDPSFSV
	42120	GC_00001825	LL Core	MIT9211	21939	NA	167539.Pro1308	3'-phosphoadenosine 5'-phosphosulfate 3'-phosphatase	G3DSA:3.40.190.80	G3DSA:3.40.190.80	PR00377	Inositol monophosphatase superfamily signature					P	P			COG1218	3'-Phosphoadenosine 5'-phosphosulfate (PAPS) 3'-phosphatase					PF00459	Inositol monophosphatase family					SSF56655	SSF56655	PS00630	Inositol monophosphatase family signature 2.	-----------------------MSWGAADILMAYARGSKPPYGFPMELEIEDNPGGPVSAADLAVNSWLLDGINSKFPTATWKLLSEENAKEEFVEGLSACNGWIWILDPLDGTKDFIKGTGEYAVHLALVNDHHLKMGVVLIPEKEELWFGVLGEGAWCENRLGEKRNVKFSNRTQISEMILVASKSHRDKTLSQLMERISPGETKGIGSVGCKVGTILRGEADFYISLSGKTAPKDWDMAAPEAVLRAAGGGFTHADGRPLSYNKDNYEQRGCLIVSHGKNHDLICKLAEDEIKKLDPFFEI
	42114	GC_00001825	LL Core	MIT9303	28787	ECG	74547.PMT1378	3'-phosphoadenosine 5'-phosphosulfate 3'-phosphatase	G3DSA:3.30.540.10	G3DSA:3.30.540.10	PR00377	Inositol monophosphatase superfamily signature					P	P			COG1218	3'-Phosphoadenosine 5'-phosphosulfate (PAPS) 3'-phosphatase					PF00459	Inositol monophosphatase family					SSF56655	SSF56655	PS00630	Inositol monophosphatase family signature 2.	MMPNAPLLPVGVDLEVLLQQLRRLSWGAADILLAYARGEQPPHGFSKALSVDDGGEGPVSAADLAVNRWLLDGLEANFPLADWTLLSEETAKEQLTEGEPLAAEWLWILDPLDGTKDFLQGTGEYAVHLALVHGQRPVLGVVLLPEAEELWFGVIGSGAWCEDRQGQRSPVRFSQRKAFGELMLVASRNHRDNRLEQLLESLALGGSKAVGSVGCKVTTILRGETDLYVSLSGRSAPKDWDMAAPEAVLMAAGGCFTHADGRQLAYNSGDVRQAGCLIASHGLAHAQLCEAAARAMEEIDPGFQV
	42117	GC_00001825	LL Core	MIT9313	36330	ECG	74547.PMT1378	3'-phosphoadenosine 5'-phosphosulfate 3'-phosphatase	G3DSA:3.30.540.10	G3DSA:3.30.540.10	PR00377	Inositol monophosphatase superfamily signature					P	P			COG1218	3'-Phosphoadenosine 5'-phosphosulfate (PAPS) 3'-phosphatase					PF00459	Inositol monophosphatase family					SSF56655	SSF56655	PS00630	Inositol monophosphatase family signature 2.	-MPNAPVLPDGVNLEILLQHLRRLSWGAADILLAYARGEQPPHGFSKALSVEDGGEGPVSAADLAVNRWLLDGLEANFPLADWTLLSEETAKEQLTAGEPLAAEWLWILDPLDGTKDFLQGTGEYAVHLALVRGQRPVLGVVLLPEAEELWFGVIGSGAWCEDRRGKRSPVRFSQRQAVCELMLVASRNHRDNRLEQLLESLALGGSKAVGSVGCKVTTILRGETDLYVSLSGRSAPKDWDMAAPEAVLMAAGGCFTHADGRQLAYNSGDVRQAGCLIASHGLAHAQLCEAAARAMKEIDPGFQV
	42122	GC_00001825	LL Core	NATL1A	48301	ECG	64471.sync_2087	3'-phosphoadenosine 5'-phosphosulfate 3'-phosphatase	G3DSA:3.30.540.10	G3DSA:3.30.540.10							P	P			COG1218	3'-Phosphoadenosine 5'-phosphosulfate (PAPS) 3'-phosphatase					PF00459	Inositol monophosphatase family					SSF56655	SSF56655	PS00630	Inositol monophosphatase family signature 2.	-MSIDLVVPKEVELPTLLDVLRKLSWASADVLMAYARGDEPPYGFPKSLTVEEGGDGPVSAADMAVNELLISGLKDNLAFKEWDILSEETSKEKTFQQDNYKKDWCWILDPLDGTKDFLQGSENYAVHIALAYKKKPKIGIVLIPEKNELWFGIVGIGAWFENRDGSKNHFSFSDRLDISKLILVSSKNHQQSKLNNLLSTLCFGETKKIGSVGCKVVSILRGEADVYISLSGKTSPKDWDMAAPHALIEAAGGMFSHADGKNLIYQETNYSQSGCLIASHGKSHQKICQKAMDFFSLEEPKYFV
	42116	GC_00001825	LL Core	NATL2A	50266	ECG	74547.PMT1378	3'-phosphoadenosine 5'-phosphosulfate 3'-phosphatase	G3DSA:3.30.540.10	G3DSA:3.30.540.10	PR00377	Inositol monophosphatase superfamily signature					P	P			COG1218	3'-Phosphoadenosine 5'-phosphosulfate (PAPS) 3'-phosphatase					PF00459	Inositol monophosphatase family					SSF56655	SSF56655	PS00630	Inositol monophosphatase family signature 2.	-MSIDLVVPKEVELPTLLDELRKLSWASADVLMAYARGGEPPYGFPKSLNVEEGGDGPVSAADMAVNELLISGLKDNLAFKEWDILSEETSKEKTFQQDNYKKDWCWILDPLDGTKDFLQGSENYAVHIALAYKKKPKIGIVLIPEKNELWFGIVGIGAWFEDRDGSKNHFSFSDRLDISKLILVSSKNHQQSKLNNLLSTLCFGETKKIGSVGCKVASILRGEADVYISLSGKTSPKDWDMAAPHALIEAAGGMFSHADGKNLVYQEKNYSQSGCLIASHGKSHQKICQKAMDFFSLEEPKYFV
	42115	GC_00001825	LL Core	PAC1	51423	EAG	74547.PMT1378	3'-phosphoadenosine 5'-phosphosulfate 3'-phosphatase	G3DSA:3.30.540.10	G3DSA:3.30.540.10	PR00377	Inositol monophosphatase superfamily signature					P	P			COG1218	3'-Phosphoadenosine 5'-phosphosulfate (PAPS) 3'-phosphatase					PF00459	Inositol monophosphatase family					SSF56655	SSF56655	PS00630	Inositol monophosphatase family signature 2.	-MSIDLVVPKEVELPTLLDELRKLSWASADVLMAYARGGEPPYGFPLPLTVEEGVDGPVSAADMAVNELLISGLKDNLAFKEWDILSEETSKEKTFQQNNYKKDWCWILDPLDGTKDFLQGSENYAVHIALAYKKKPKIGIVLIPEKNELWFGIVGIGAWFENRDGSKNHFSFSDRLDISKLILVSSKNHQQSKLNNLLSTLCFGEIKKIGSVGCKVASILRGDADVYISLSGKTSPKDWDMAAPHALIEAAGGMFSHADGRNLVYQETNYSQSGCLIASHGKSHQKICQKTMDFFSLEEPKYFV
	42113	GC_00001825	LL Core	SS2	55044	NA	167539.Pro1308	3'-phosphoadenosine 5'-phosphosulfate 3'-phosphatase	G3DSA:3.30.540.10	G3DSA:3.30.540.10	PR00377	Inositol monophosphatase superfamily signature					P	P			COG1218	3'-Phosphoadenosine 5'-phosphosulfate (PAPS) 3'-phosphatase					PF00459	Inositol monophosphatase family					SSF56655	SSF56655	PS00630	Inositol monophosphatase family signature 2.	-MKKEVELPNGVNLNNLLEKLRELSWGAADILKAYARGEKPPYDFPEVLSVQEGGDGPVSAADLAVNSWLIEGLKASFASVKWALISEETAKEQLVIGEPLNNQWVWILDPLDGTKDFLQGTGEYAVHLALVNGNNPVLGVVLIPELEELWIGLVGSGSWCEDRFGNKKPAVFSSRKEISEMTLVASRSHRDEKLEKLINSLPFAQKQIVGSVGCKVAKILKGEADFYISLSAKTAPKDWDMAAPEAVLKAAGGSFTHANNKPLKYNTGEINQWGCLIASHGRNHDLLCSVIQNELLSIDPSFSV
	42121	GC_00001825	LL Core	SS35	56655	NA	167539.Pro1308	3'-phosphoadenosine 5'-phosphosulfate 3'-phosphatase	G3DSA:3.30.540.10	G3DSA:3.30.540.10	PR00377	Inositol monophosphatase superfamily signature					P	P			COG1218	3'-Phosphoadenosine 5'-phosphosulfate (PAPS) 3'-phosphatase					PF00459	Inositol monophosphatase family					SSF56655	SSF56655	PS00630	Inositol monophosphatase family signature 2.	-MKKEVELPNGVNLNNLLEKLRELSWGAADILKAYARGEKPPYDFPEVLSVQEGGDGPVSAADLAVNSWLIEGLKASFASVKWALISEETAKEQLVIGEPLNNQWVWILDPLDGTKDFLQGTGEYAVHLALVNGNNPVLGVVLIPELEELWIGLVGSGSWCEDRFGNKKPAVFSSRKEISEMTLVASRSHRDEKLEKLINSLPFAQKQIVGSVGCKVAKILKGEADFYISLSAKTAPKDWDMAAPEAVLKAAGGSFTHANNKPLKYNTGEINQWGCLIASHGRNHDLLCSVIQNELLSIDPSFSV
	42119	GC_00001825	LL Core	SS51	58886	NA	167539.Pro1308	3'-phosphoadenosine 5'-phosphosulfate 3'-phosphatase	G3DSA:3.30.540.10	G3DSA:3.30.540.10	PR00377	Inositol monophosphatase superfamily signature					P	P			COG1218	3'-Phosphoadenosine 5'-phosphosulfate (PAPS) 3'-phosphatase					PF00459	Inositol monophosphatase family					SSF56655	SSF56655	PS00630	Inositol monophosphatase family signature 2.	-MKKEVELPNGVNLNNLLEKLRELSWGAADILKAYARGEKPPYDFPEVLSVQEGGDGPVSAADLAVNSWLIEGLKASFASVKWALISEETAKEQLVIGEPLNNQWVWILDPLDGTKDFLQGTGEYAVHLALVNGNNPVLGVVLIPELEELWIGLVGSGSWCEDRFGNKKPAVFSSRKEISEMTLVASRSHRDEKLEKLINSLPFAQKQIVGSVGCKVAKILKGEADFYISLSAKTAPKDWDMAAPEAVLKAAGGSFTHANNKPLKYNTGEINQWGCLIASHGRNHDLLCSVIQNELLSIDPSFSV
	55104	GC_00000049	HL+LL Core	AS9601	566	ECG	146891.A9601_05861	30S ribosomal protein S1	G3DSA:2.40.50.140	G3DSA:2.40.50.140							J	J			COG0539	Ribosomal protein S1			SM00316	Ribosomal protein S1-like RNA-binding domain	PF00575	S1 RNA binding domain	PS50126	S1 domain profile.			SSF50249	SSF50249			----------------------------------MGASNKNAQDNIQPKGN----KKPLQVLHISKKDSQ----EINNEQNNSQEDIKKENI---AIKPQ---IIKDNSVKEIEDSNEKTKDFDISQQDLTQQDLNRP-------LNFSEQKIDFQLE-------RTVDEFDFDESAFLEALNANEPIGATGETISGKVIAIESDGLYVDIGGKAPGYMPKKECGLGVITNFKEKFSIGLEMEVLVIKEQNADGMVTVSARALILRQSWEKVSNSAKNGELINVLINGFNRGGLTCDVDGLRGFIPRSQLEDGQDYQSFVGKNLKVAFLEVNPESRKLVLSEKKASLVSKLTSLELGQLIEGEVLAVKPYGFFIDLGGASGLLHQSSLTNGSIRSLREV…
	55125	GC_00000049	HL+LL Core	CCMP1375	2376	NA	93059.P9211_05331	30S ribosomal protein S1	G3DSA:2.40.50.140	G3DSA:2.40.50.140					Coil	Coil	J	J			COG0539	Ribosomal protein S1			SM00316	Ribosomal protein S1-like RNA-binding domain	PF00575	S1 RNA binding domain	PS50126	S1 domain profile.			SSF50249	SSF50249			---------------------------------MAGSGNPQPKRPNPPRQEQSDLRKPLQVMHISRKEERQDIDNLKKVEESRQKSSTISKGAKQPLSPN-----TSKPSENIAQNNQTAFDQEYE-EGLSMGDLLAQERDSS-KNNSTPFESDGFLE-------RSVDDFDFDEGEFLAALDENEPVGNTGETAKGSVIGVESDGVYVDIGGKAPGFMPKSECGLGVITNLKERFPKGLEVEVLVTREQNADGMVTISCRALALRKSWDKVIQLAKEAKVVEVKLNGFNRGGVTCDLEGLRGFIPRSQLNQGDDHESLVGKTINVAFIEVSPDNRKLILSEKKAATAAKFAELEVGQLIEGKVISVKPYGFFVDLGGISGLLHQSMITNGSLRSLREV…
	55119	GC_00000049	HL+LL Core	EQPAC1	5250	ECG	59919.PMM0530	30S ribosomal protein S1	G3DSA:2.40.50.140	G3DSA:2.40.50.140							J	J			COG0539	Ribosomal protein S1			SM00316	Ribosomal protein S1-like RNA-binding domain	PF00575	S1 RNA binding domain	PS50126	S1 domain profile.			SSF50249	SSF50249			---------------------------------MKGVSDKDAQNNKKIKGDKNNLKKPLQVLHISKKDTISNKEEVFDGHQNSSKEVKTDIS---AVKPK---FI-EAPIDEVKESYSNNINFENI----SYKELEKP-------LTFQDEDEDFIIE-------RKVDEFDFDESAFLEALNENEPIGATGETIKGKVIALESDGLYIDIGGKAPGFMPKKECGLGVITNFKEKFTIDLEMEVLVIKEQNADGMVTVSARALILRQSWEKVASSAKNGELIQVTINGFNRGGLTCDVDGLRGFIPRSQLENGQDYQSLVSKNLKVAFLEVNPETRKLVLSEKKALLVSKFADLKFGQLIEGEVLAIKPYGFFVDLGGASGLLHQSSITNGSIRNLREI…
	55105	GC_00000049	HL+LL Core	GP2	5608	ECG	146891.A9601_05861	30S ribosomal protein S1	G3DSA:2.40.50.140	G3DSA:2.40.50.140							J	J			COG0539	Ribosomal protein S1			SM00316	Ribosomal protein S1-like RNA-binding domain	PF00575	S1 RNA binding domain	PS50126	S1 domain profile.			SSF50249	SSF50249			----------------------------------MGVRNKNAQDNIQPKGN----KKPLQVLHISKKDTQ----EISNEQNNSQEVIKKENI---AIKPQ---LIKDDSVKEIEASNVNTENLDISQQDSTQQDLNRP-------LNFSEHNTDFQIE-------RKVDEFDFDENAFLEALNENEPIGATGETITGKTIAIESDGLYVDIGGKAPGYMPKKECGLGVITNFKEKFSIGQEMEVLVIKEQNADGMVTVSARALILRKSWEKVSSSAKNGELINVLINGFNRGGLTCDVDGLRGFIPRSQLEDGQNYQSFVGKTLKVAFLEVNPESRKLVLSEKKASLVSKLTSLELGQLIEGEVLAVKPYGFFIDLGGASGLLHQSSLTNGSIRSLREV…
	55106	GC_00000049	HL+LL Core	GP2	7411	EAG	93060.P9215_06111	30S ribosomal protein S1	G3DSA:2.40.50.140	G3DSA:2.40.50.140							J	J			COG0539	Ribosomal protein S1							PS50126	S1 domain profile.			SSF50249	SSF50249			-----------------------------------------------------------------------------------------------------------------------------------------------------------------------------------------------------------------------------------------------------------------------------------------------------------------------------------------------------------------------------------------------HQSSLTNGSIRSLREV…
	55113	GC_00000049	HL+LL Core	LG	8534	NA	93059.P9211_05331	30S ribosomal protein S1	G3DSA:2.40.50.140	G3DSA:2.40.50.140					Coil	Coil	J	J			COG0539	Ribosomal protein S1			SM00316	Ribosomal protein S1-like RNA-binding domain	PF00575	S1 RNA binding domain	PS50126	S1 domain profile.			SSF50249	SSF50249			---------------------------------MAGSGNPQPKRPNPPRQEQSDLRKPLQVMHISRKEERQDIDNLKKVEESRQKSSTISKGAKQPLSPN-----TSKPSENIAQNNQTAFDQEYE-EGLSMGDLLAQERDSS-KNNSTPFESDGFLE-------RSVDDFDFDEGEFLAALDENEPVGNTGETAKGSVIGVESDGVYVDIGGKAPGFMPKSECGLGVITNLKERFPKGLEVEVLVTREQNADGMVTISCRALALRKSWDKVIQLAKEAKVVEVKLNGFNRGGVTCDLEGLRGFIPRSQLNQGDDHESLVGKTINVAFIEVSPDNRKLILSEKKAATAAKFAELEVGQLIEGKVISVKPYGFFVDLGGISGLLHQSMITNGSLRSLREV…
	55111	GC_00000049	HL+LL Core	MED4	9811	ECG	59919.PMM0530	30S ribosomal protein S1	G3DSA:2.40.50.140	G3DSA:2.40.50.140							J	J			COG0539	Ribosomal protein S1			SM00316	Ribosomal protein S1-like RNA-binding domain	PF00575	S1 RNA binding domain	PS50126	S1 domain profile.			SSF50249	SSF50249			---------------------------------MKGVSDKDAQNNKKIKGDKNNLKKPLQVLHISKKDTISNKEEVFDGHQNSSKEVKTDIS---AVKPK---FI-EAPIDEVKESYSNNINFE----NISYKELEKP-------LTFQDEDEDFIIE-------RKVDEFDFDESAFLEALNENEPIGATGETIKGKVIALESDGLYIDIGGKAPGFMPKKECGLGVITNFKEKFTIDLEMEVLVIKEQNADGMVTVSARALILRQSWEKVASSAKNGELIQVTINGFNRGGLTCDVDGLRGFIPRSQLENGQDYQSLVSKNLKVAFLEVNPETRKLVLSEKKALLVSKFADLKFGQLIEGEVLAIKPYGFFVDLGGASGLLHQSSITNGSIRNLREI…
	55103	GC_00000049	HL+LL Core	MIT9107	11923	ECG	74546.PMT9312_0530	30S ribosomal protein S1	G3DSA:2.40.50.140	G3DSA:2.40.50.140							J	J			COG0539	Ribosomal protein S1			SM00316	Ribosomal protein S1-like RNA-binding domain	PF00575	S1 RNA binding domain	PS50126	S1 domain profile.			SSF50249	SSF50249			----------------------------------MGVSNKNAPNNNQKEGNKKDLKKPLQVIHISKKDTEKKSPEIQNEKTNSQEKIKNETI---AIKPQ---LIKDKSVKEIENNNAILKNLDVS-----QKDLSNP-------LDFSAQNTGFELE-------RVVDEFDFDESAFLEALNANEPIGSEGETISGKVIAIESDGLYVDIGGKAPGFMPKKECGLGVITNFKEKFSIGLEMEVLVIKEQNADGMVTVSARALILRQSWEKVSSSAKNGELIDVLINGFNRGGLTCDVDGLRGFIPRSQLEDGQDHQSFVGKNIKVAYLEVNPETRKLVLSEKKASLVSKITSLKLGQLIEGKVLATKPYGFFIDLGGASGLLHQSSITNGSIRTLREI…
	55102	GC_00000049	HL+LL Core	MIT9116	14074	ECG	74546.PMT9312_0530	30S ribosomal protein S1	G3DSA:2.40.50.140	G3DSA:2.40.50.140							J	J			COG0539	Ribosomal protein S1			SM00316	Ribosomal protein S1-like RNA-binding domain	PF00575	S1 RNA binding domain	PS50126	S1 domain profile.			SSF50249	SSF50249			----------------------------------MGVSNKNAPNNNQKEGNKKDLKKPLQVLHISKKDTEKKSPEIQNEKTNSQEKIKNETI---AIKPQ---LIKDKSVKEIENNNAILKNLDVS-----QKDLSNP-------LDFSAQNTGFELE-------RVVDEFDFDESAFLEALNANEPIGSEGETISGKVIAIESDGLYVDIGGKAPGFMPKKECGLGVITNFKEKFSIGLEMEVLVIKEQNADGMVTVSARALILRQSWEKVSSSAKNGELIDVLINGFNRGGLTCDVDGLRGFIPRSQLEDGQDHQSFVGKNIKVAYLEVNPETRKLVLSEKKASLVSKITSLKLGQLIEGKVLATKPYGFFIDLGGASGLLHQSSITNGSIRTLREI…
	55107	GC_00000049	HL+LL Core	MIT9123	16362	ECG	74546.PMT9312_0530	30S ribosomal protein S1	G3DSA:2.40.50.140	G3DSA:2.40.50.140							J	J			COG0539	Ribosomal protein S1			SM00316	Ribosomal protein S1-like RNA-binding domain	PF00575	S1 RNA binding domain	PS50126	S1 domain profile.			SSF50249	SSF50249			----------------------------------MGVSNKNAPNNNQKEGNKKDLKKPLQVLHISKKDTEKKSPEIQNEKTNSQEKIKNETI---AIKPQ---LIKDKSVKEIENNNAILKNLDVS-----QKDLSNP-------LDFSAQNTGFELE-------RVVDEFDFDESAFLEALNANEPIGSEGETISGKVIAIESDGLYVDIGGKAPGFMPKKECGLGVITNFKEKFSIGLEMEVLVIKEQNADGMVTVSVRALILRQSWEKVSSSAKNGELIDVLINGFNRGGLTCDVDGLRGFIPRSQLEDGQDHQSFVGKNIKVAYLEVNPETRKLVLSEKKASLVSKITSLKLGQLIEGKVLATKPYGFFIDLGGASGLLHQSSITNGSIRTLREI…
	55109	GC_00000049	HL+LL Core	MIT9201	18207	ECG	146891.A9601_05861	30S ribosomal protein S1	G3DSA:2.40.50.140	G3DSA:2.40.50.140							J	J			COG0539	Ribosomal protein S1			SM00316	Ribosomal protein S1-like RNA-binding domain	PF00575	S1 RNA binding domain	PS50126	S1 domain profile.			SSF50249	SSF50249			----------------------------------MGASNKNAQDNIQPKGN----KKPIQVLHISKKDSQ----EINNEQNNSQKDIKK-NI---AIKPQ---IIKDNSVKEIEDSNEKTKDFDISQQDLTQQDLNRP-------LNFSEQNADFQLE-------RTVDEFDFDESAFLEALNANEPIGATGETISGKVIAIESDGLYVDIGGKAPGYMPKKECGLGVITNFKEKFSIGLEMKVLVIKEQNADGMVTVSARALILRQSWEKVSSSAKNGDLINVLINGFNRGGLTCDVDGLRGFIPRSQLEDGQDYQSFVGKNLKVAFLEVNPESRKLVLSEKKASLVSKLTSLELGQLIEGEVLAVKPYGFFIDLGGASGLLHQSSLTNGSIRSLREV…
	55116	GC_00000049	HL+LL Core	MIT9202	20210	ECG	167546.P9301_05561	30S ribosomal protein S1	G3DSA:2.40.50.140	G3DSA:2.40.50.140							J	J			COG0539	Ribosomal protein S1			SM00316	Ribosomal protein S1-like RNA-binding domain	PF00575	S1 RNA binding domain	PS50126	S1 domain profile.			SSF50249	SSF50249			----------------------------------MGVNNKNAQDNIQPKGN----KKPLQVLHISKKDTQ----KIDNDQTNSQEEIKKEDI---EIKPQ---IIKNDSVKKIEDNNENTKDFDISPQNLTQQDLNRP-------LNFSEQNTDFQLE-------RTVDEFDFDESAFLEALNANEPIGATGETISGKVIAIESDGLYVDIGGKAPGYMPKKECGLGVITNFKEKFSIGLEMEVLVIKEQNADGMVTVSARALILRQSWEKVSSSAKNGELINVLINGFNRGGLTCDVDGLRGFIPRSQLEDGQDYQSFVGKTLKVAFLEVNPESRKLVLSEKKASLVSKLTSLELGQLIEGEVLAVKPYGFFIDLGGASGLLHQSSLTNGSIRSLREV…
	55121	GC_00000049	HL+LL Core	MIT9211	21248	NA	93059.P9211_05331	30S ribosomal protein S1	G3DSA:2.40.50.140	G3DSA:2.40.50.140	PR00681	Ribosomal protein S1 signature			Coil	Coil	J	J			COG0539	Ribosomal protein S1			SM00316	Ribosomal protein S1-like RNA-binding domain	PF00575	S1 RNA binding domain	PS50126	S1 domain profile.			SSF50249	SSF50249			-------------------------------------------------------------MHISRKKEQERLRKEEKNALKEKKSADQKNDAKESIENA---YPPSRPPKSDNKTYTNDLNLDVQ-EGVSMEDLLKEE-----TIKSPGFNQADSME-------RILDDFDFDEEAFLEALNENEPIGSTGEIAKGCVIGIESDGVYVDIGGKAPGFMPKNECGLGVITNLKERFPKGLEVEVLVTREQNADGMVTISCRALVLRKSWETVMQLEKDGKTVEVTINGFNRGGVTCDLEGLRGFIPRSQLEQTENHESLVGKKLCVAFIEVNPDSRKLILSEKKAATAARFAELEIGQIVAGEILAIKPYGFFVDLGGVSGLLHQSMITNGSIRSLREV…
	55118	GC_00000049	HL+LL Core	MIT9215	23068	ECG	93060.P9215_06111	30S ribosomal protein S1	G3DSA:2.40.50.140	G3DSA:2.40.50.140							J	J			COG0539	Ribosomal protein S1			SM00316	Ribosomal protein S1-like RNA-binding domain	PF00575	S1 RNA binding domain	PS50126	S1 domain profile.			SSF50249	SSF50249			----------------------------------MGVSNKNAQDNIQPKGNKKDFKKPLQVLHISKKDTQ----KIKNEQINSQEEIKKENI---SIKPQ---LIKDGPVKEIEDSIENTKAFDIA-----QQDLNRP-------LNFSEQNTDFQLE-------RTVDEFDFDESAFLEALNANEPIGATGETISGKVIAIESDGLYVDIGGKAPGYMPKKECGLGIITNFKEKFSIGLEMEVLVIKEQNADGMVTVSARALILRQSWEKVSSSAKNGELINVLINGFNRGGLTCDVDGLRGFIPRSQLEDGQDYQSFVGKTLKVAFLEVNPESRKLVLSEKKASLVSKLTNLELGQLIEGEVLAVKPYGFFIDLGGASGLLHQSSLTNGSIRSLREV…
	55117	GC_00000049	HL+LL Core	MIT9301	24961	ECG	167546.P9301_05561	30S ribosomal protein S1	G3DSA:2.40.50.140	G3DSA:2.40.50.140							J	J			COG0539	Ribosomal protein S1			SM00316	Ribosomal protein S1-like RNA-binding domain	PF00575	S1 RNA binding domain	PS50126	S1 domain profile.			SSF50249	SSF50249			----------------------------------MGVSNKNAQDNIEPKGN----KKPLQVLHISKKDTQ----KIDIEHSNSQEEIKKEDI---AIKPQ---IIKNDSVKKIEENYENTKDFDISLQNSTQQDLNRP-------LNFSEQNPDFHSE-------RTVDEFDFDESAFLEALNANEPIGATGETISGKVIAIESDGLYIDIGGKAPGYMPKKECGLGVITNFKEKFSIGLEMEVLVIKEQNADGMVTVSARALILRQSWEKVSSSAKNGELINVLINGFNRGGLTCDVDGLRGFIPRSQLEDGQDYQSFVGKTLKVAFLEVNPESRKLVLSEKKASLVSKLTSLELGQLIEGEVLAVKPYGFFIDLGGASGLLHQSSLTNGSIRSLREV…
	55115	GC_00000049	HL+LL Core	MIT9302	27420	ECG	74546.PMT9312_0530	30S ribosomal protein S1	G3DSA:2.40.50.140	G3DSA:2.40.50.140					Coil	Coil	J	J			COG0539	Ribosomal protein S1			SM00316	Ribosomal protein S1-like RNA-binding domain	PF00575	S1 RNA binding domain	PS50126	S1 domain profile.			SSF50249	SSF50249			----------------------------------MGVSNKNAQDNIQPKGIKKDFKKPLQVLHISKKDTQKKSQEIQNERNDSQEEIKKENI---AIKPQ---IIKGESVKEIEDSNKNTKAFESS-----QQDLNRP-------LNFSEQNTDFQLE-------RTVDEFDFDESAFLEALNENEPIGATGETISGKVIAIESDGLYVDIGGKAPGYMPKKECGLGVITNFKEKFSIGLEMEVLVIKEQNADGMVTVSARALILRQSWEKVSNSAKNGELIEVLINGFNRGGLTCDVDGLRGFIPRSQLEDGQDYQSFVGKTLKVAFLEVNPESRKLVLSEKKASLVSKLTSLELGQLIEGEVLAVKPYGFFIDLGGASGLLHQSSLTNGSIRSLREI…
	55095	GC_00000049	HL+LL Core	MIT9303	28940	ECG	74547.PMT1233	30S ribosomal protein S1	G3DSA:2.40.50.140	G3DSA:2.40.50.140					Coil	Coil	J	J			COG0539	Ribosomal protein S1			SM00316	Ribosomal protein S1-like RNA-binding domain	PF00575	S1 RNA binding domain	PS50126	S1 domain profile.			SSF50249	SSF50249			---------------------------------MAGSGSPQPNRPKPPKPAAEAPRKPLQVMHISRRGEQEKLVREAAETTSPGSEATTGSG---QLSNA-----PNRSVSADAASDESRFDLGEL-QNMTMADLLGPADQSR-RSGAAPKGNDYRNEEGQSNPARSVDDFDFDEDAFLAALDENEPIGTTGEVATGKVIALESDGVYVDIGGKAPGFMPKNECGLGVITNLKERFPKGLEVEVLVTREQNADGMVTISCRALELRKSWSKVQQMEKEGKVAQVKVNGFNRGGVTCDLEGLRGFIPRSQLQNGENHEALVGKTLGVAFLEVNPETRKLVLSEKRAATAARFSELEVGQLVEGQVVAVKPYGFFIDLGGVSGLLHQSMITGGSLRSLREV…
	55124	GC_00000049	HL+LL Core	MIT9311	32841	ECG	74546.PMT9312_0530	30S ribosomal protein S1	G3DSA:2.40.50.140	G3DSA:2.40.50.140					Coil	Coil	J	J			COG0539	Ribosomal protein S1			SM00316	Ribosomal protein S1-like RNA-binding domain	PF00575	S1 RNA binding domain	PS50126	S1 domain profile.			SSF50249	SSF50249			----------------------------------MGVSNKNAQDNIQPKGNKKNFKKPLQVLHISKKDTQKKSQEIQNEQNNSQEEIKKENI---AIKPQ---IIKDESVNEIEDSNENTKAFDSS-----QQNLNRP-------LNFSEQNTDFQLE-------RTVDEFDFDESAFLEALNENEPIGATGETISGKVIAIESDGLYVDIGGKAPGYMPKKECGLGVITNFKEKFSIGLEMEVLVIKEQNADGMVTVSARALILRQSWEKVSNSAKNGELIDVLINGFNRGGLTCDVDGLRGFIPRSQLEDGQDYQSFVGKTLKVAFLEVNPESRKLVLSEKKASLVSKLTSLDLGQLIEGEVLAVKPYGFFIDLGGASGLLHQSSLTKGSIRSLREI…
	55110	GC_00000049	HL+LL Core	MIT9312	33401	ECG	74546.PMT9312_0530	30S ribosomal protein S1	G3DSA:2.40.50.140	G3DSA:2.40.50.140					Coil	Coil	J	J			COG0539	Ribosomal protein S1			SM00316	Ribosomal protein S1-like RNA-binding domain	PF00575	S1 RNA binding domain	PS50126	S1 domain profile.			SSF50249	SSF50249			----------------------------------MGVSNKNAQDNIQPKGNKKNFKKPLQVLHISKKDTQKKSQEIQNEQNNSQEEIKKENI---AIKPQ---IIKDESVNEIEDSNENTKAFDSS-----QQNLNRP-------LNFSEQNTDFQLE-------RTVDEFDFDESAFLEALNENEPIGATGETISGKVIAIESDGLYVDIGGKAPGYMPKKECGLGVITNFKEKFSIGLEMEVLVIKEQNADGMVTVSARALILRQSWEKVSNSAKNGELIDVLINGFNRGGLTCDVDGLRGFIPRSQLEDGQDYQSFVGKTLKVAFLEVNPESRKLVLSEKKASLVSKLTSLDLGQLIEGEVLAVKPYGFFIDLGGASGLLHQSSLTKGSIRSLREI…
	55101	GC_00000049	HL+LL Core	MIT9313	36175	ECG	74547.PMT1233	30S ribosomal protein S1	G3DSA:2.40.50.140	G3DSA:2.40.50.140					Coil	Coil	J	J			COG0539	Ribosomal protein S1			SM00316	Ribosomal protein S1-like RNA-binding domain	PF00575	S1 RNA binding domain	PS50126	S1 domain profile.			SSF50249	SSF50249			---------------------------------MAGSGSPQPNRPKPPKPAAEAPRKPLQVMHISKRGEQDKLVREAAEITSPGSKATAASG---QLSNA-----PNRSVSADAASDESRFDLGEL-QNMTMADLLGPADQSR-RSASAPKGIDHRNEEGQSNPARSVDDFDFDEDAFLAALDENEPIGTTGEVATGKVIALESDGVYVDIGGKAPGFMPKNECGLGVITNLKERFPKGLEVEVLVTREQNADGMVTISCRALELRKSWSKVQQMEKEGKVAQVKVNGFNRGGVTCDLEGLRGFIPRSQLQNGENHEALIGKTLGVAFLEVNPETRKLVLSEKRAATAARFSELEVGQLVEGQVVAVKPYGFFIDLGGVSGLLHQSMITGGSLRSLREV…
	55100	GC_00000049	HL+LL Core	MIT9314	37362	ECG	167546.P9301_05561	30S ribosomal protein S1	G3DSA:2.40.50.140	G3DSA:2.40.50.140							J	J			COG0539	Ribosomal protein S1			SM00316	Ribosomal protein S1-like RNA-binding domain	PF00575	S1 RNA binding domain	PS50126	S1 domain profile.			SSF50249	SSF50249			----------------------------------MGVSNKNAQENIQPKGN----KKPLQVLHISKKDTQ----KIDNEQTNSQEEIKKEDI---AIKPQ---IIKNDSVKKVEDNNESTKNFDISQQNLTQQDLNRP-------LNFSEQNTDFQLE-------RTVDEFDFDESAFLEALNANEPIGATGETISGKVIAIESDGLYVDIGGKAPGYMPKKECGLGVITNFKEKFSIGLEMEVLVIKEQNADGMVTVSARALILRQSWEKVSSSAKNGELINVLINGFNRGGLTCDVDGLRGFIPRSQLEDGQDYQSFVGKTLKVAFLEVNPESRKLVLSEKKASLVSKITSLELGQLIEGEVLAVKPYGFFIDLGGASGLLHQSSLTNGSIRSLREV…
	55108	GC_00000049	HL+LL Core	MIT9321	40389	ECG	146891.A9601_05861	30S ribosomal protein S1	G3DSA:2.40.50.140	G3DSA:2.40.50.140							J	J			COG0539	Ribosomal protein S1			SM00316	Ribosomal protein S1-like RNA-binding domain	PF00575	S1 RNA binding domain	PS50126	S1 domain profile.			SSF50249	SSF50249			----------------------------------MGVNNKNAQENIPLKGN----KKPLQVLHISKKDTQKKSRDINNDQTNSQEETKKENI---AIKPQ---IIKDDSVKEIDNSNENTNDFDISQQDLTQQDLNRP-------LNFSEQNTDFQFE-------RTVDEFDFDESAFLEALNANEPIGATGEIISGKVIAIESDGLYVDIGGKAPGYMPKKECGLGVITNFKEKFSIGLEMEVLVIKEQNADGMVTVSARALILRQSWEKVSGSAKNGELINVLINGFNRGGLTCDVDGLRGFIPRSQLENGQDYQSFVGKTLKVAFLEVNPESRKLVLSEKKASLVSKLTSLELGQLIEGEVLAVKPYGFFIDLDGASGLLHQSSLTNGSIRSLREV…
	55098	GC_00000049	HL+LL Core	MIT9322	42826	ECG	146891.A9601_05861	30S ribosomal protein S1	G3DSA:2.40.50.140	G3DSA:2.40.50.140							J	J			COG0539	Ribosomal protein S1			SM00316	Ribosomal protein S1-like RNA-binding domain	PF00575	S1 RNA binding domain	PS50126	S1 domain profile.			SSF50249	SSF50249			----------------------------------MGVNNKNAQENIPLKGN----KKPLQVLHISKKDTQKKSRDINNDQTNSQEETKKENI---AIKPQ---IIKDDSVKEIDNSNENTNDFDISQQDLTQQDLNRP-------LNFSEQNTDFQFE-------RTVDEFDFDESAFLEALNANEPIGATGEIISGKVIAIESDGLYVDIGGKAPGYMPKKECGLGVITNFKEKFSIGLEMEVLVIKEQNADGMVTVSARALILRQSWEKVSGSAKNGELINVLINGFNRGGLTCDVDGLRGFIPRSQLENGQDYQSFVGKTLKVAFLEVNPESRKLVLSEKKASLVSKLTSLELGQLIEGEVLAVKPYGFFIDLDGASGLLHQSSLTNGSIRSLREV…
	55120	GC_00000049	HL+LL Core	MIT9401	44688	ECG	146891.A9601_05861	30S ribosomal protein S1	G3DSA:2.40.50.140	G3DSA:2.40.50.140							J	J			COG0539	Ribosomal protein S1			SM00316	Ribosomal protein S1-like RNA-binding domain	PF00575	S1 RNA binding domain	PS50126	S1 domain profile.			SSF50249	SSF50249			----------------------------------MGVNNKNAQENIPLKGN----KKPLQVLHISKKDTQKKSRDINNDQTNSQEETKKENI---AIKPQ---IIKDDSVKEIDNSNENTNDFDISQQDLTQQDLNRP-------LNFSEQNTDFQFE-------RTVDEFDFDESAFLEALNANEPIGATGEIISGKVIAIESDGLYVDIGGKAPGYMPKKECGLGVITNFKEKFSIGLEMEVLVIKEQNADGMVTVSARALILRQSWEKVSGSAKNGELINVLINGFNRGGLTCDVDGLRGFIPRSQLENGQDYQSFVGKTLKVAFLEVNPESRKLVLSEKKASLVSKLTSLELGQLIEGEVLAVKPYGFFIDLDGASGLLHQSSLTNGSIRSLREV…
	55099	GC_00000049	HL+LL Core	MIT9515	45491	ECG	167542.P9515_05941	30S ribosomal protein S1	G3DSA:2.40.50.140	G3DSA:2.40.50.140	PR00681	Ribosomal protein S1 signature					J	J			COG0539	Ribosomal protein S1			SM00316	Ribosomal protein S1-like RNA-binding domain	PF00575	S1 RNA binding domain	PS50126	S1 domain profile.			SSF50249	SSF50249			---------------------------------MKGVNDKGAQNDKKIKGQKNDVKKPLQVLHISKKDSEKEKEANFDDNQKLSNGITKDIN---ATKPQ---II-EAPLNEDKENHSANINLENK----SYQELAKP-------VNFKDEDQEFIIE-------RKVDEFDFDENAFLEALNENEPIGTTGETIKGKIIALESDGLYVDIGGKAPGFMPKKECGLGVITNFKEKFPIGLEMEVLVIKEQNADGMVTISSRALILRQSWEKVENSAKNGELIQVSINGFNRGGLTCDVDGLRGFIPRSQLEDGQDYQSLVNKTLKVAFLEVNPESRKLVLSEKKALLVSKFSGLKLGQLIEGEVLGIKPYGFFVDLGGASGLLHQSSITNGSIRNLREI…
	55123	GC_00000049	HL+LL Core	NATL1A	47324	ECG	167555.NATL1_05861	30S ribosomal protein S1	G3DSA:2.40.50.140	G3DSA:2.40.50.140					Coil	Coil	J	J			COG0539	Ribosomal protein S1			SM00316	Ribosomal protein S1-like RNA-binding domain	PF00575	S1 RNA binding domain	PS50126	S1 domain profile.			SSF50249	SSF50249			MLKSASLKNDRNLLIIKKQLTLDCKNVSLITKGIMAGSDPQPKKATPPRPAINAPRKPLQVMHISRKPEEEIINEGSSEKEFSEQPKDRRFDEK-VLAPKEISYLKKAPEQQKSIGQDSSDDFQSA----TMEDLLRSENNTNYKNNIEAFDDQNIFE----QKSRTVDEFDFDEDEFLAALEENQPIGTTGEIAKGSVIAVESDGIYVDIGGKAPGFMPKNECGLGVITNLKERFPKGLKVEVLVTREQNADGMVTISCRALELRKSWDKVQNLAKEGKVIRVKINGFNRGGVTCDFEGLRGFIPRSQLEDGENHQSLVSKTISTAFLEVNPERRKLVLSEKKAAIASRFSELEIGQLIEGEILTIKPYGFFVDLRGVSGLLHHSMVTNGSMRSLREV…
	55097	GC_00000049	HL+LL Core	NATL2A	49343	ECG	167555.NATL1_05861	30S ribosomal protein S1	G3DSA:2.40.50.140	G3DSA:2.40.50.140					Coil	Coil	J	J			COG0539	Ribosomal protein S1			SM00316	Ribosomal protein S1-like RNA-binding domain	PF00575	S1 RNA binding domain	PS50126	S1 domain profile.			SSF50249	SSF50249			MLKSASLKNDRNLLIIKKQLTLGCKNVSLITKGIMAGSDPQPKKATPQRPAINAPRKPLQVMHISRKPEEEIINEESSEKEFSEQPKDRRFAEK-VLAPKEISYLKKAPEQQNSIGKDSSDDFQSE----TMEDLLRSENNTNYKNNIEAFDDQNIFE----QKSRTVDEFDFDEDEFLAALEENQPIGTTGEIAKGSVIAVESDGIYVDIGGKAPGFMPKNECGLGVITNLKERFPKGLKVEVLVTREQNADGMVTISCRALELRKSWDKVQNLAKEGKVIRVKINGFNRGGVTCDFEGLRGFIPRSQLEDGENHQSLVSKTISTAFLEVNPERRKLVLSEKKAAIASRFSELEIGQLIEGEILTIKPYGFFVDLRGVSGLLHHSMVTNGSMRSLREV…
	55096	GC_00000049	HL+LL Core	PAC1	52341	ECG	167555.NATL1_05861	30S ribosomal protein S1	G3DSA:2.40.50.140	G3DSA:2.40.50.140					Coil	Coil	J	J			COG0539	Ribosomal protein S1			SM00316	Ribosomal protein S1-like RNA-binding domain	PF00575	S1 RNA binding domain	PS50126	S1 domain profile.			SSF50249	SSF50249			MLKSASLKNDRNLLIIKKQLTLGCKNVSLITKGIMAGSDPQPKKATPPRPAINAPRKPLQVMHISRKPEEEIINEGSSEKEFS-EQLKDKRFDEKVLAPKEISYLKKAPEQQKSIGKDSSDDFQSA----TMEDLLRSENNTNYKNNIEAFDDQNIFE----QKSRTVDEFDFDENEFLAALEENQPIGTTGEIAKGSVIAVESDGIYVDIGGKAPGFMPKNECGLGVITNLKERFPKGLKVEVLVTREQNADGMVTISCRALELRKSWDKVQNLAKEGKVIRVKINGFNRGGVTCDFEGLRGFIPRSQLEDGENHQSLVSKTISTAFLEVNPERRKLVLSEKKAAIASRFSELEIGQLIEGEILTIKPYGFFVDLRGVSGLLHHSMVTNGSMRSLREV…
	55112	GC_00000049	HL+LL Core	SB	53498	ECG	146891.A9601_05861	30S ribosomal protein S1	G3DSA:2.40.50.140	G3DSA:2.40.50.140							J	J			COG0539	Ribosomal protein S1			SM00316	Ribosomal protein S1-like RNA-binding domain	PF00575	S1 RNA binding domain	PS50126	S1 domain profile.			SSF50249	SSF50249			----------------------------------MGVSNKNAQDNIQPKGN----KKPLQVLHISKKDSQKKSKEIHEVPTNSQEDIKKENI---AIKPQ---IIKDDSLKKIEDINENTKDFDIP-----QQDLNRP-------LNFSEQNTDFQLE-------RTVDEFDFDESAFLEALNANEPIGATGETISGKVIAIESDGLYVDIGGKAPGYMPKKECGLGVITNFKEKFSIGLEMEVLVIKEQNADGMVTVSARALILRQSWEKVSSSAKNGELINVLINGFNRGGLTCDVDGLRGFIPRSQLEDGQDYQSFVGKTLKVAFLEVNPESRKLVLSEKKASLVSKLTSLELGQLIEGEVLAVKPYGFFIDLGGASGLLHQSSLTNGSIRSLREV…
	55094	GC_00000049	HL+LL Core	SS2	55221	NA	93059.P9211_05331	30S ribosomal protein S1	G3DSA:2.40.50.140	G3DSA:2.40.50.140					Coil	Coil	J	J			COG0539	Ribosomal protein S1			SM00316	Ribosomal protein S1-like RNA-binding domain	PF00575	S1 RNA binding domain	PS50126	S1 domain profile.			SSF50249	SSF50249			---------------------------------MAGSGNPQPKRPNPPRQEQSDLRKPLQVMHISRKEERQDIDNLKKVEESRQKSSTISKGAKQPLSPN-----TSKPSENIAQNNQTAFDQEYE-EGLSMGDLLAQERDSS-KNNSTPFESDGFLE-------RSVDDFDFDEGEFLAALDENEPVGNTGETAKGSVIGVESDGVYVDIGGKAPGFMPKSECGLGVITNLKERFPKGLEVEVLVTREQNADGMVTISCRALALRKSWDKVIQLAKEAKVVEVKLNGFNRGGVTCDLEGLRGFIPRSQLNQGDDHESLVGKTINVAFIEVSPDNRKLILSEKKAATAAKFAELEVGQLIEGKVISVKPYGFFVDLGGISGLLHQSMITNGSLRSLREV…
	55122	GC_00000049	HL+LL Core	SS35	58312	NA	93059.P9211_05331	30S ribosomal protein S1	G3DSA:2.40.50.140	G3DSA:2.40.50.140					Coil	Coil	J	J			COG0539	Ribosomal protein S1			SM00316	Ribosomal protein S1-like RNA-binding domain	PF00575	S1 RNA binding domain	PS50126	S1 domain profile.			SSF50249	SSF50249			---------------------------------MAGSGNPQPKRPNPPRQEQSDLRKPLQVMHISRKEERQDIDNLKKVEESRQKSSTISKGAKQPLSPN-----TSKPSENIAQNNQTAFDQEYE-EGLSMGDLLAQERDSS-KNNSTPFESDGFLE-------RSVDDFDFDEGEFLAALDENEPVGNTGETAKGSVIGVESDGVYVDIGGKAPGFMPKSECGLGVITNLKERFPKGLEVEVLVTREQNADGMVTISCRALALRKSWDKVIQLAKEAKVVEVKLNGFNRGGVTCDLEGLRGFIPRSQLNQGDDHESLVGKTINVAFIEVSPDNRKLILSEKKAATAAKFAELEVGQLIEGKVISVKPYGFFVDLGGISGLLHQSMITNGSLRSLREV…
	55114	GC_00000049	HL+LL Core	SS51	58663	NA	93059.P9211_05331	30S ribosomal protein S1	G3DSA:2.40.50.140	G3DSA:2.40.50.140					Coil	Coil	J	J			COG0539	Ribosomal protein S1			SM00316	Ribosomal protein S1-like RNA-binding domain	PF00575	S1 RNA binding domain	PS50126	S1 domain profile.			SSF50249	SSF50249			---------------------------------MAGSGNPQPKRPNPPRQEQSDLRKPLQVMHISRKEERQDIDNLKKVEESRQKSSTISKGAKQPLSPN-----TSKPSENIAQNNQTAFDQEYE-EGLSMGDLLAQERDSS-KNNSTPFESDGFLE-------RSVDDFDFDEGEFLAALDENEPVGNTGETAKGSVIGVESDGVYVDIGGKAPGFMPKSECGLGVITNLKERFPKGLEVEVLVTREQNADGMVTISCRALALRKSWDKVIQLAKEAKVVEVKLNGFNRGGVTCDLEGLRGFIPRSQLNQGDDHESLVGKTINVAFIEVSPDNRKLILSEKKAATAAKFAELEVGQLIEGKVISVKPYGFFVDLGGISGLLHQSMITNGSLRSLREV…
	227	GC_00000634	HL+LL Core	AS9601	327	ECG	146891.A9601_03361	30S ribosomal protein S1	G3DSA:2.40.50.140	G3DSA:2.40.50.140	PR00681	Ribosomal protein S1 signature					J	J			COG0539	Ribosomal protein S1			SM00316	Ribosomal protein S1-like RNA-binding domain	PF00575	S1 RNA binding domain	PS50126	S1 domain profile.			SSF50249	SSF50249			---MNENSSQTIKEIS-------EDQEIKNSSELDNNSAS-----QNEEDLSFEKSDIPQADSSSSRTN-TDFDNAGFTQEEFASLLGKYDYNFKPGDLVKGTVFALEPKGAMIDIGAKTAAFMPVQEVSINRVEGLNDVLQPSESREFFIMSEENEDGQLALSIRRIEYQRAWERVRQLQKEDATIYSEVFATNRGGALVRVEGLRGFIPGSHISARRIKDDLEGEYLPLKFLEVDEERNRLVLSHRRALVEKKMNRLEVGEVVVGSVKGIKPYGAFIDIGGVSGLLHISEISHEHIETPHNVLNVSDQMKVMIIDLDSERGRISLSTKALEPEPGDMLTDPQKVFSKAEEMAAKYKQMLFEQTDENEEIATASAETL
	247	GC_00000634	HL+LL Core	CCMP1375	2208	NA	93059.P9211_03471	30S ribosomal protein S1	G3DSA:2.40.50.140	G3DSA:2.40.50.140	PR00681	Ribosomal protein S1 signature			Coil	Coil	J	J			COG0539	Ribosomal protein S1			SM00316	Ribosomal protein S1-like RNA-binding domain	PF00575	S1 RNA binding domain	PS50126	S1 domain profile.			SSF50249	SSF50249			---MSENSSAPVTELE-------ESNADSQITSPENEQNADLADQAATHEESFNTEEIPSADDPSSRVKKYDFDGAGFSLEEFDSLLGKYDYNFKPGDIVNGTVFALETKGAMIDIGAKTAAFMPMQEVSINRVEGLSDVLQPSEIRQFFIMSEENEDGQLSLSIRRIEYQRAWERVRQLQKEDATIYSEVFATNRGGALVRVEGLRGFIPGSHISTRKAKEELVAEYLPLKFLEVDEERNRLVLSHRRALVERKMNRLEVGEVVVGAVRGIKPYGAFIDIGGVSGLLHISEISHEHIETPHSVLNVNDQMKVMIIDLDAERGRISLSTKALEPEPGDMLTDPQKVFDKAEEMAAKYKEMLLEQAEEGEN-PITSMEV-
	241	GC_00000634	HL+LL Core	EQPAC1	5495	ECG	93059.P9211_03471	30S ribosomal protein S1	G3DSA:2.40.50.140	G3DSA:2.40.50.140	PR00681	Ribosomal protein S1 signature			Coil	Coil	J	J			COG0539	Ribosomal protein S1			SM00316	Ribosomal protein S1-like RNA-binding domain	PF00575	S1 RNA binding domain	PS50126	S1 domain profile.			SSF50249	SSF50249			---MIENPSQIVKEIS-------DEKEIENSTIEENTSDT-----PKEEDLSFDHKDIPSADSSSSRRN-NDLDTAGFTQEEFASLLGKYDYNFKPGDLVKGTVFALEPKGAMIDIGAKTAAFMPMQEVSINRVEGLSDVLQPSESREFFIMSEENEDGQLALSIRRIEYQRAWERVRQLQKEDATIYSEVFATNRGGALVRVEGLRGFIPGSHISARKIKEDLEGEYLPLKFLEVDEERNRLVLSHRRALVEKKMNRLEVGEVVIGSVKGIKPYGAFIDIGGVSGLLHISEISHEHIETPHNVLNVNDQMKVMIIDLDSERGRISLSTKALEPEPGDMLTDPQKVFNKAEEMAAKYKQMLLEQTDENEEQTVEIAESV
	228	GC_00000634	HL+LL Core	GP2	6050	ECG	93059.P9211_03471	30S ribosomal protein S1	G3DSA:2.40.50.140	G3DSA:2.40.50.140	PR00681	Ribosomal protein S1 signature					J	J			COG0539	Ribosomal protein S1			SM00316	Ribosomal protein S1-like RNA-binding domain	PF00575	S1 RNA binding domain	PS50126	S1 domain profile.			SSF50249	SSF50249			---MNENSSPTIKELS-------EDQEIKNSSELDNDSAS-----QNEEDLSFEKSDIPSADSSSSRTN-TDFDNAGFTQEEFASLLGKYDYNFKPGDLVKGTVFALEPKGAMIDIGAKTAAFMPVQEVSINRVEGLNDVLQPSESREFFIMSEENEDGQLALSIRRIEYQRAWERVRQLQKEDATIYSEVFATNRGGALVRVEGLRGFIPGSHISARKIKDDLEGEYLPLKFLEVDEERNRLVLSHRRALVEKKMNRLEVGEVVVGSVKGIKPYGAFIDIGGVSGLLHISEISHEHIETPHNILNVNDQMKVMIIDLDSERGRISLSTKALEPEPGDMLTDPQKVFSKAEEMAAKYKQMLFEQTDDNEEIPLASS---
	235	GC_00000634	HL+LL Core	LG	8702	NA	93059.P9211_03471	30S ribosomal protein S1	G3DSA:2.40.50.140	G3DSA:2.40.50.140	PR00681	Ribosomal protein S1 signature			Coil	Coil	J	J			COG0539	Ribosomal protein S1			SM00316	Ribosomal protein S1-like RNA-binding domain	PF00575	S1 RNA binding domain	PS50126	S1 domain profile.			SSF50249	SSF50249			---MSENSSAPVTELE-------ESNADSQITSPENEQNADLADQAATHEESFNTEEIPSADDPSSRVKKYDFDGAGFSLEEFDSLLGKYDYNFKPGDIVNGTVFALETKGAMIDIGAKTAAFMPMQEVSINRVEGLSDVLQPSEIRQFFIMSEENEDGQLSLSIRRIEYQRAWERVRQLQKEDATIYSEVFATNRGGALVRVEGLRGFIPGSHISTRKAKEELVAEYLPLKFLEVDEERNRLVLSHRRALVERKMNRLEVGEVVVGAVRGIKPYGAFIDIGGVSGLLHISEISHEHIETPHSVLNVNDQMKVMIIDLDAERGRISLSTKALEPEPGDMLTDPQKVFDKAEEMAAKYKEMLLEQAEEGEN-PITSMEV-
	233	GC_00000634	HL+LL Core	MED4	9566	ECG	93059.P9211_03471	30S ribosomal protein S1	G3DSA:2.40.50.140	G3DSA:2.40.50.140	PR00681	Ribosomal protein S1 signature			Coil	Coil	J	J			COG0539	Ribosomal protein S1			SM00316	Ribosomal protein S1-like RNA-binding domain	PF00575	S1 RNA binding domain	PS50126	S1 domain profile.			SSF50249	SSF50249			---MIENPSQIVKEIS-------DEKEIENSTIEENTSDT-----PKEEDLSFDHKDIPSADSSSSRRN-NDLDTAGFTQEEFASLLGKYDYNFKPGDLVKGTVFALEPKGAMIDIGAKTAAFMPMQEVSINRVEGLSDVLQPSESREFFIMSEENEDGQLALSIRRIEYQRAWERVRQLQKEDATIYSEVFATNRGGALVRVEGLRGFIPGSHISARKIKEDLEGEYLPLKFLEVDEERNRLVLSHRRALVEKKMNRLEVGEVVIGSVKGIKPYGAFIDIGGVSGLLHISEISHEHIETPHNVLNVNDQMKVMIIDLDSERGRISLSTKALEPEPGDMLTDPQKVFNKAEEMAAKYKQMLLEQTDENEEQTVEIAESV
	226	GC_00000634	HL+LL Core	MIT9107	12310	ECG	93060.P9215_03371	30S ribosomal protein S1	G3DSA:2.40.50.140	G3DSA:2.40.50.140	PR00681	Ribosomal protein S1 signature					J	J			COG0539	Ribosomal protein S1			SM00316	Ribosomal protein S1-like RNA-binding domain	PF00575	S1 RNA binding domain	PS50126	S1 domain profile.			SSF50249	SSF50249			---MNENSSQTIQELS-------EDKEIKNLPELNNDSES-----RNEEDLSFEKNDIPSADSSSSRTN-ADFDNAGFTQEEFASLLGKYDYNFKPGDLVKGTVFALEPKGAMIDIGAKTAAFMPVQEVSINRVEGLNDVLQPSESREFFIMSEENEDGQLALSIRRIEYQRAWERVRQLQKEDATIYSEVFATNRGGALVRVEGLRGFIPGSHISARKIKDDLEGEYLPLKFLEVDEERNRLVLSHRRALVEKKMNRLEVGEVVVGSVKGIKPYGAFIDIGGVSGLLHISEISHEHIETPHNVLNVSDQMKVMIIDLDSERGRISLSTKALEPEPGDMLTDPQKVFNKAEEMAAKYKQMLFEQTDDNEEIPTTSSETV
	225	GC_00000634	HL+LL Core	MIT9116	14251	ECG	93060.P9215_03371	30S ribosomal protein S1	G3DSA:2.40.50.140	G3DSA:2.40.50.140	PR00681	Ribosomal protein S1 signature					J	J			COG0539	Ribosomal protein S1			SM00316	Ribosomal protein S1-like RNA-binding domain	PF00575	S1 RNA binding domain	PS50126	S1 domain profile.			SSF50249	SSF50249			---MNENSSQTIQELS-------EDKEIKNLPELNNDSES-----RNEEDLSFEKNDIPSADSSSSRTN-ADFDNAGFTQEEFASLLGKYDYNFKPGDLVKGTVFALEPKGAMIDIGAKTAAFMPVQEVSINRVEGLNDVLQPSESREFFIMSEENEDGQLALSIRRIEYQRAWERVRQLQKEDATIYSEVFATNRGGALVRVEGLRGFIPGSHISARKIKDDLEGEYLPLKFLEVDEERNRLVLSHRRALVEKKMNRLEVGEVVVGSVKGIKPYGAFIDIGGVSGLLHISEISHEHIETPHNVLNVSDQMKVMIIDLDSERGRISLSTKALEPEPGDMLTDPQKVFNKAEEMAAKYKQMLFEQTDDNEEIPTTSSETV
	229	GC_00000634	HL+LL Core	MIT9123	15370	ECG	93060.P9215_03371	30S ribosomal protein S1	G3DSA:2.40.50.140	G3DSA:2.40.50.140	PR00681	Ribosomal protein S1 signature					J	J			COG0539	Ribosomal protein S1			SM00316	Ribosomal protein S1-like RNA-binding domain	PF00575	S1 RNA binding domain	PS50126	S1 domain profile.			SSF50249	SSF50249			---MNENSSQTIQELS-------EDKEIKNLPELNNDSES-----RNEEDLSFEKNDIPSADSSSSRTN-ADFDNAGFTQEEFASLLGKYDYNFKPGDLVKGTVFALEPKGAMIDIGAKTAAFMPVQEVSINRVEGLNDVLQPSESREFFIMSEENEDGQLALSIRRIEYQRAWERVRQLQKEDATIYSEVFATNRGGALVRVEGLRGFIPGSHISARKIKDDLEGEYLPLKFLEVDEERNRLVLSHRRALVEKKMNRLEVGEVVVGSVKGIKPYGAFIDIGGVSGLLHISEISHEHIETPHNVLNVSDQMKVMIIDLDSERGRISLSTKALEPEPGDMLTDPQKVFNKAEEMAAKYKQMLFEQTDDNEEIPTTSSETV
	231	GC_00000634	HL+LL Core	MIT9201	18487	ECG	146891.A9601_03361	30S ribosomal protein S1	G3DSA:2.40.50.140	G3DSA:2.40.50.140	PR00681	Ribosomal protein S1 signature					J	J			COG0539	Ribosomal protein S1			SM00316	Ribosomal protein S1-like RNA-binding domain	PF00575	S1 RNA binding domain	PS50126	S1 domain profile.			SSF50249	SSF50249			MRKMTENSSQTIKELS-------EDKEIKNSSELDNASTS-----QNDEDLSFEKNDIPSADSSSSRTN-VDFDNAGFTQEEFASLLGKYDYNFKPGDLVKGTVFALEPKGAMIDIGAKTAAFMPVQEVSINRVEGLNDVLQPSESREFFIMSEENEDGQLALSIRRIEYQRAWERVRQLQKEDATIYSEVFATNRGGALVRVEGLRGFIPGSHISARKIKDDLEGEYLPLKFLEVDEERNRLVLSHRRALVEKKMNRLEVGEVVVGSVKGIKPYGAFIDIGGVSGLLHISEISHEHIETPHNVLNVSDQMKVMIIDLDSERGRISLSTKALEPEPGDMLTDPQKVFSKAEEMAAKYKQMLFEQTDDNEEIPAASAEKV
	238	GC_00000634	HL+LL Core	MIT9202	19962	ECG	93060.P9215_03371	30S ribosomal protein S1	G3DSA:2.40.50.140	G3DSA:2.40.50.140	PR00681	Ribosomal protein S1 signature					J	J			COG0539	Ribosomal protein S1			SM00316	Ribosomal protein S1-like RNA-binding domain	PF00575	S1 RNA binding domain	PS50126	S1 domain profile.			SSF50249	SSF50249			---MNENSSQTIKELS-------EDQEIKNSSDLDNDSAS-----QNEEDLSFDNSDIPSADSSSSRTN-TDFDNAGFTQEEFASLLGKYDYNFKPGDLVKGTVFALEPKGAMIDIGAKTAAFMPVQEVSINRVEGLNDVLQPSESREFFIMSEENEDGQLALSIRRIEYQRAWERVRQLQKEDATIYSEVFATNRGGALVRVEGLRGFIPGSHISARKIKDDLEGEYLPLKFLEVDEERNRLVLSHRRALVEKKMNRLEVGEVVVGSVKGIKPYGAFIDIGGVSGLLHISEISHEHIETPHNVLNVNDQMKVMIIDLDSERGRISLSTKALEPEPGDMLTDPQKVFSKAEEMAAKYKQMLFEQTDENEEIQTASAETV
	243	GC_00000634	HL+LL Core	MIT9211	21068	NA	93059.P9211_03471	30S ribosomal protein S1	G3DSA:2.40.50.140	G3DSA:2.40.50.140	PR00681	Ribosomal protein S1 signature			Coil	Coil	J	J			COG0539	Ribosomal protein S1			SM00316	Ribosomal protein S1-like RNA-binding domain	PF00575	S1 RNA binding domain	PS50126	S1 domain profile.			SSF50249	SSF50249			---MVENSPEASQKLE-TEEQAAKSIDESQTSSPEINNKT--PEETGNQVDTDIPEDIPTADDPSSRVKKHDFDGVGFTLEEFDSLLSKYDYNFKPGDIVNGTVFALETKGAMIDIGAKTAAFMPMQEVSINRVEGLSDVLQPSEVRQFFIMSEENEDGQLSLSIRRIEYQRAWERVRQLQKEDATIYSEVFATNRGGALVRVEGLRGFIPGSHISTRKAKEELVAEFLPLKFLEVDEERNRLVLSHRRALVERKMNRLEVGEVVVGAVRGIKPYGAFIDIGGVSGLLHISEISHEHIETPHSVLNVNDQMKVMIIDLDAERGRISLSTKALEPEPGDMLSDPQKVFDKAEEMAAKYKEMLLEQAEEGEN-PIATMEI-
	240	GC_00000634	HL+LL Core	MIT9215	22802	ECG	93060.P9215_03371	30S ribosomal protein S1	G3DSA:2.40.50.140	G3DSA:2.40.50.140	PR00681	Ribosomal protein S1 signature					J	J			COG0539	Ribosomal protein S1			SM00316	Ribosomal protein S1-like RNA-binding domain	PF00575	S1 RNA binding domain	PS50126	S1 domain profile.			SSF50249	SSF50249			---MNENSSQTIKELS-------EDQEIKNSSDLDNDSAS-----KNEEDLSFENSDIPSADSSSSRTN-TDFDNAGFTQEEFASLLGKYDYNFKPGDLVKGTVFALEPKGAMIDIGAKTAAFMPVQEVSINRVEGLNDVLQPSESREFFIMSEENEDGQLALSIRRIEYQRAWERVRQLQKEDATIYSEVFATNRGGALVRVEGLRGFIPGSHISARKIKDDLEGEYLPLKFLEVDEERNRLVLSHRRALVEKKMNRLEVGEVVVGSVKGIKPYGAFIDIGGVSGLLHISEISHEHIETPHNVLNVNDQMKVMIIDLDSERGRISLSTKALEPEPGDMLTDPQKVFSKAEEMAAKYKQMLFEQTDENEDMPTATAETV
	239	GC_00000634	HL+LL Core	MIT9301	24753	ECG	93059.P9211_03471	30S ribosomal protein S1	G3DSA:2.40.50.140	G3DSA:2.40.50.140	PR00681	Ribosomal protein S1 signature					J	J			COG0539	Ribosomal protein S1			SM00316	Ribosomal protein S1-like RNA-binding domain	PF00575	S1 RNA binding domain	PS50126	S1 domain profile.			SSF50249	SSF50249			---MNENSSQTIKELS-------ENQEIKNSSELDNDAAS-----QNEEDLSFEKSDIPSADSSSSRTN-TDFDNAGFTQEEFASLLGKYDYNFKPGDLVKGTVFALEPKGAMIDIGAKTAAFMPVQEVSINRVEGLNDVLQPSESREFFIMSEENEDGQLALSIRRIEYQRAWERVRQLQKEDATIYSEVFATNRGGALVRVEGLRGFIPGSHISARKIKDDLEGEYLPLKFLEVDEERNRLVLSHRRALVEKKMNRLEVGEVVVGNVKGIKPYGAFIDIGGVSGLLHISEISHEHIETPHNVLNVNDQMKVMIIDLDSERGRISLSTKALEPEPGDMLTDPQKVFSKAEEMAAKYKQMLFEQTDDIEEIPTASNEAE
	237	GC_00000634	HL+LL Core	MIT9302	28206	ECG	93060.P9215_03371	30S ribosomal protein S1	G3DSA:2.40.50.140	G3DSA:2.40.50.140	PR00681	Ribosomal protein S1 signature					J	J			COG0539	Ribosomal protein S1			SM00316	Ribosomal protein S1-like RNA-binding domain	PF00575	S1 RNA binding domain	PS50126	S1 domain profile.			SSF50249	SSF50249			---MNENSSQTIKELS-------EDKEIKNSSELDNDSVS-----QNEEDLSFEKNDIPSADSSSSRTN-TDFDNAGFTQEEFASLLGKYDYNFKPGDLVKGTVFALEPKGAMIDIGAKTAAFMPVQEVSINRVEGLNDVLQPSESREFFIMSEENEDGQLALSIRRIEYQRAWERVRQLQKEDATIYSEVFATNRGGALVRVEGLRGFIPGSHISARKIKDDLEGEYLPLKFLEVDEERNRLVLSHRRALVEKKMNRLEVGEVVVGSVKGIKPYGAFIDIGGVSGLLHISEISHEHIETPHNVLNVSDQMKVMIIDLDSERGRISLSTKALEPEPGDMLTDPQKVFSKAEEMAAKYKQMLFEQTDDTEENPIAAPETV
	218	GC_00000634	HL+LL Core	MIT9303	30227	ECG	93059.P9211_03471	30S ribosomal protein S1	G3DSA:2.40.50.140	G3DSA:2.40.50.140	PR00681	Ribosomal protein S1 signature			Coil	Coil	J	J			COG0539	Ribosomal protein S1			SM00316	Ribosomal protein S1-like RNA-binding domain	PF00575	S1 RNA binding domain	PS50126	S1 domain profile.			SSF50249	SSF50249			---MSATPTEQVQDSA-------AESTSSEQVINTASETAEAANQALAEEDLSIPEDVPTADDPSSRAAKNDLSGAGFTLDEFASLLSKYDYNFKPGDIVNGTVFALESKGAMIDIGAKTAAFMPLQEVSINRVEGLSDVLLPGEIREFFIMSEENEDGQLSLSIRRIEYQRAWERVRQLQKEDATIYSEVFATNRGGALVRVEGLRGFIPGSHISTRKPKEELVADFLPLKFLEVDEERNRLVLSHRRALVERKMNRLEVGEVVIGAVRGIKPYGAFIDIGGVSGLLHISEISHEHIETPHSVLNVNDQMKVMIIDLDAERGRISLSTKALEPEPGDMLTDPQKVFDKAEEMAARYKQMLLEQAEEGED-PEVVPLD-
	246	GC_00000634	HL+LL Core	MIT9311	31722	ECG	74546.PMT9312_0318	30S ribosomal protein S1	G3DSA:2.40.50.140	G3DSA:2.40.50.140	PR00681	Ribosomal protein S1 signature					J	J			COG0539	Ribosomal protein S1			SM00316	Ribosomal protein S1-like RNA-binding domain	PF00575	S1 RNA binding domain	PS50126	S1 domain profile.			SSF50249	SSF50249			MQQMNENSSQTTKELS-------ENKEFKNSPELDNNSMP-----KNEEDLSFEKSDIPSADASSSRTN-TDLDNAGFTQEEFASLLGKYDYNFKLGDLVKGTVFALEPKGAMIDIGAKTAAFMPVQEVSINRVEGLDDVLQPSESREFFIMSEENEDGQLALSIRRIEYQRAWERVRQLQKEDATIYSEVFATNRGGALVRVEGLRGFIPGSHISARRVKDDLEGEYLPLKFLEVDEERNRLVLSHRRALVEKKMNRLEVGEVVVGSVKGIKPYGAFIDIGGVSGLLHISEISHEHIETPHNVLNVSDQMKVMIIDLDSERGRISLSTKALEPEPGDMLTDPQKVFSKAEEMAAKYKQMLFEQTDEAEETASASSETV
	232	GC_00000634	HL+LL Core	MIT9312	33185	ECG	74546.PMT9312_0318	30S ribosomal protein S1	G3DSA:2.40.50.140	G3DSA:2.40.50.140	PR00681	Ribosomal protein S1 signature					J	J			COG0539	Ribosomal protein S1			SM00316	Ribosomal protein S1-like RNA-binding domain	PF00575	S1 RNA binding domain	PS50126	S1 domain profile.			SSF50249	SSF50249			MQQMNENSSQTTKELS-------ENKEFKNSPELDNNSMP-----KNEEDLSFEKSDIPSADASSSRTN-TDLDNAGFTQEEFASLLGKYDYNFKLGDLVKGTVFALEPKGAMIDIGAKTAAFMPVQEVSINRVEGLDDVLQPSESREFFIMSEENEDGQLALSIRRIEYQRAWERVRQLQKEDATIYSEVFATNRGGALVRVEGLRGFIPGSHISARRVKDDLEGEYLPLKFLEVDEERNRLVLSHRRALVEKKMNRLEVGEVVVGSVKGIKPYGAFIDIGGVSGLLHISEISHEHIETPHNVLNVSDQMKVMIIDLDSERGRISLSTKALEPEPGDMLTDPQKVFSKAEEMAAKYKQMLFEQTDEAEETASASSETV
	224	GC_00000634	HL+LL Core	MIT9313	36667	ECG	93059.P9211_03471	30S ribosomal protein S1	G3DSA:2.40.50.140	G3DSA:2.40.50.140	PR00681	Ribosomal protein S1 signature			Coil	Coil	J	J			COG0539	Ribosomal protein S1			SM00316	Ribosomal protein S1-like RNA-binding domain	PF00575	S1 RNA binding domain	PS50126	S1 domain profile.			SSF50249	SSF50249			---MSATPTEQVQDSA-------ADSTSSEQVINTTSETAEAAKQALAEEDLSIPEDVPTADDPSSRAAKNDLSGAGFTLDEFASLLSKYDYNFKPGDIVNGTVFALESKGAMIDIGAKTAAFMPLQEVSINRVEGLSDVLLPGEIREFFIMSEENEDGQLSLSIRRIEYQRAWERVRQLQKEDATIYSEVFATNRGGALVRVEGLRGFIPGSHISTRKPKEELVADFLPLKFLEVDEERNRLVLSHRRALVERKMNRLEVGEVVIGAVRGIKPYGAFIDIGGVSGLLHISEISHEHIETPHSVLNVNDQMKVMIIDLDAERGRISLSTKALEPEPGDMLTDPQKVFDKAEEMAARYKQMLLEQAEEGED-PEVVPLD-
	223	GC_00000634	HL+LL Core	MIT9314	38137	ECG	93059.P9211_03471	30S ribosomal protein S1	G3DSA:2.40.50.140	G3DSA:2.40.50.140	PR00681	Ribosomal protein S1 signature					J	J			COG0539	Ribosomal protein S1			SM00316	Ribosomal protein S1-like RNA-binding domain	PF00575	S1 RNA binding domain	PS50126	S1 domain profile.			SSF50249	SSF50249			---MNENSSQTIKELS-------EDQEIKNSSELGKDSES-----QNEVDLSFENTDIPSADSSSSRTN-TDFENAGFTQEEFASLLGKYDYNFKPGDLVKGTVFALEPKGAMIDIGAKTAAFMPVQEVSINRVEGLNDVLQPSESREFFIMSEENEDGQLALSIRRIEYQRAWERVRQLQKEDATIYSEVFATNRGGALVRVEGLRGFIPGSHISARKIKDDLEGEYLPLKFLEVDEERNRLVLSHRRALVEKKMNRLEVGEVVVGSVKGIKPYGAFIDIGGVSGLLHISEISHEHIETPHNVLNVNDQMKVMIIDLDSERGRISLSTKALEPEPGDMLTDPQKVFSKAEEMAAKYKQMLFEQTDENEEIPSASAESV
	230	GC_00000634	HL+LL Core	MIT9321	40032	ECG	93059.P9211_03471	30S ribosomal protein S1	G3DSA:2.40.50.140	G3DSA:2.40.50.140	PR00681	Ribosomal protein S1 signature					J	J			COG0539	Ribosomal protein S1			SM00316	Ribosomal protein S1-like RNA-binding domain	PF00575	S1 RNA binding domain	PS50126	S1 domain profile.			SSF50249	SSF50249			---MNENSSQTIKELS-------EDQKIKNSSEPDNNSAS-----QNEEEISFETKDIPSADSSSSRTN-LDFENAGFTQEEFASLLGKYDYNFKPGDLVKGTVFALEPKGAMIDIGAKTAAFMPVQEVSINRVEGLNDVLQPSESREFFIMSEENEDGQLALSIRRIEYQRAWERVRQLQKEDATIYSEVFATNRGGALVRVEGLRGFIPGSHISARKIKDDLEGEYLPLKFLEVDEERNRLVLSHRRALVEKKMNRLEVGEVVIGSVKGIKPYGAFIDIGGVSGLLHISEISHEHIETPHNILNVNDQMKVMIIDLDSERGRISLSTKALEPEPGDMLTDPQKVYNKAEEMAAKYKQMLFEQTDETEEIPTASSETI
	221	GC_00000634	HL+LL Core	MIT9322	43002	ECG	93059.P9211_03471	30S ribosomal protein S1	G3DSA:2.40.50.140	G3DSA:2.40.50.140	PR00681	Ribosomal protein S1 signature					J	J			COG0539	Ribosomal protein S1			SM00316	Ribosomal protein S1-like RNA-binding domain	PF00575	S1 RNA binding domain	PS50126	S1 domain profile.			SSF50249	SSF50249			---MNENSSQTIKELS-------EDQKIKNSSEPDNNSAS-----QNEEEISFETKDIPSADSSSSRTN-LDFENAGFTQEEFASLLGKYDYNFKPGDLVKGTVFALEPKGAMIDIGAKTAAFMPVQEVSINRVEGLNDVLQPSESREFFIMSEENEDGQLALSIRRIEYQRAWERVRQLQKEDATIYSEVFATNRGGALVRVEGLRGFIPGSHISARKIKDDLEGEYLPLKFLEVDEERNRLVLSHRRALVEKKMNRLEVGEVVIGSVKGIKPYGAFIDIGGVSGLLHISEISHEHIETPHNILNVNDQMKVMIIDLDSERGRISLSTKALEPEPGDMLTDPQKVYNKAEEMAAKYKQMLFEQTDETEEIPTASSETI
	242	GC_00000634	HL+LL Core	MIT9401	43542	ECG	93059.P9211_03471	30S ribosomal protein S1	G3DSA:2.40.50.140	G3DSA:2.40.50.140	PR00681	Ribosomal protein S1 signature					J	J			COG0539	Ribosomal protein S1			SM00316	Ribosomal protein S1-like RNA-binding domain	PF00575	S1 RNA binding domain	PS50126	S1 domain profile.			SSF50249	SSF50249			---MNENSSQTIKELS-------EDQKIKNSSEPDNNSAS-----QNEEEISFETKDIPSADSSSSRTN-LDFENAGFTQEEFASLLGKYDYNFKPGDLVKGTVFALEPKGAMIDIGAKTAAFMPVQEVSINRVEGLNDVLQPSESREFFIMSEENEDGQLALSIRRIEYQRAWERVRQLQKEDATIYSEVFATNRGGALVRVEGLRGFIPGSHISARKIKDDLEGEYLPLKFLEVDEERNRLVLSHRRALVEKKMNRLEVGEVVIGSVKGIKPYGAFIDIGGVSGLLHISEISHEHIETPHNILNVNDQMKVMIIDLDSERGRISLSTKALEPEPGDMLTDPQKVYNKAEEMAAKYKQMLFEQTDETEEIPTASSETI
	222	GC_00000634	HL+LL Core	MIT9515	45243	ECG	93059.P9211_03471	30S ribosomal protein S1	G3DSA:2.40.50.140	G3DSA:2.40.50.140	PR00681	Ribosomal protein S1 signature			Coil	Coil	J	J			COG0539	Ribosomal protein S1			SM00316	Ribosomal protein S1-like RNA-binding domain	PF00575	S1 RNA binding domain	PS50126	S1 domain profile.			SSF50249	SSF50249			---MIENSSETIKEIS-------DDKEIENSTVKENTSET-----PKIEDLSFESKDIPSADSSSSRRN-SDLDSAGFTQEDFASLLGKYDYNFKPGDLVNGTVFALEPKGAMIDIGAKTAAFMPMQEVSINRVEGLSDVLQPSESREFFIMSEENEDGQLALSIRRIEYQRAWERVRQLQKEDATIYSEVFATNRGGALVRVEGLRGFIPGSHISARKIKEDLEGEYLPLKFLEVDEERNRLVLSHRRALVEKKMNRLEVGEVVVGSVKGIKPYGAFIDIGGVSGLLHISEISHEHIETPHNVLNVTDQMKVMIIDLDSERGRISLSTKALEPEPGDMLTDPQKVFDKAEEMAAKYKQMLLEQTDENDEQTADIPESE
	245	GC_00000634	HL+LL Core	NATL1A	47155	ECG	93059.P9211_03471	30S ribosomal protein S1	G3DSA:2.40.50.140	G3DSA:2.40.50.140	PR00681	Ribosomal protein S1 signature			Coil	Coil	J	J			COG0539	Ribosomal protein S1			SM00316	Ribosomal protein S1-like RNA-binding domain	PF00575	S1 RNA binding domain	PS50126	S1 domain profile.			SSF50249	SSF50249			---MSENPASKIEEKNPEKETSIPEETVSNSTSAEFEENS-----ISELKEDDIPKNIPAADDSSSRINKSDLESAGFTLDEFASLLSKYDYNFKPGDIVNGTVFALESKGAMIDIGAKTAAFMPMQEVSINRVEGLSDVLQPSEIREFFIMTEENEDGQLSLSIRRIEYQRAWERVRQLQKEDATIYSEVFATNRGGALVRVEGLRGFIPGSHISTRKAKEELVADFLPLKFLEVDEERNRLVLSHRRALVERKMNRLEVGEVVVGAVRGIKPYGAFIDIGGVSGLLHISEISHEHIETPHSVLNVNDQMKVMIIDLDAERGRISLSTKALEPEPGDMLTDPQKVFDKAEEMAARYKQMLLEQAEEGED-PIAVMTI-
	220	GC_00000634	HL+LL Core	NATL2A	49172	ECG	93059.P9211_03471	30S ribosomal protein S1	G3DSA:2.40.50.140	G3DSA:2.40.50.140	PR00681	Ribosomal protein S1 signature			Coil	Coil	J	J			COG0539	Ribosomal protein S1			SM00316	Ribosomal protein S1-like RNA-binding domain	PF00575	S1 RNA binding domain	PS50126	S1 domain profile.			SSF50249	SSF50249			---MSENPASKIEEKNPEKETSIPEETVSNATIAEFEENS-----ITELKEDDIPKNIPAADDSSSRINKSDLETAGFTLDEFASLLSKYDYNFKPGDIVNGTVFALESKGAMIDIGAKTAAFMPMQEVSINRVEGLSDVLQPSEIREFFIMTEENEDGQLSLSIRRIEYQRAWERVRQLQKEDATIYSEVFATNRGGALVRVEGLRGFIPGSHISTRKAKEELVADFLPLKFLEVDEERNRLVLSHRRALVERKMNRLEVGEVVVGAVRGIKPYGAFIDIGGVSGLLHISEISHEHIETPHSVLNVNDQMKVMIIDLDAERGRISLSTKALEPEPGDMLTDPQKVFDKAEEMAARYKQMLLEQAEEGED-PIAVMTI-
	219	GC_00000634	HL+LL Core	PAC1	51968	ECG	93059.P9211_03471	30S ribosomal protein S1	G3DSA:2.40.50.140	G3DSA:2.40.50.140	PR00681	Ribosomal protein S1 signature			Coil	Coil	J	J			COG0539	Ribosomal protein S1			SM00316	Ribosomal protein S1-like RNA-binding domain	PF00575	S1 RNA binding domain	PS50126	S1 domain profile.			SSF50249	SSF50249			---MSENPASKIEEKNPEKETSIPEETVSNATSAEFEENS-----ISELKEDDIPKNIPAADDSSSRINKSDLESAGFTLDEFASLLSKYDYNFKPGDIVNGTVFALESKGAMIDIGAKTAAFMPMQEVSINRVEGLSDVLQPSEIREFFIMTEENEDGQLSLSIRRIEYQRAWERVRQLQKEDATIYSEVFATNRGGALVRVEGLRGFIPGSHISTRKAKEELVADFLPLKFLEVDEERNRLVLSHRRALVERKMNRLEVGEVVVGAVRGIKPYGAFIDIGGVSGLLHISEISHEHIETPHSVLNVNDQMKVMIIDLDAERGRISLSTKALEPEPGDMLTDPQKVFDKAEEMAARYKQMLLEQAEEGED-PIAVMTI-
	234	GC_00000634	HL+LL Core	SB	53729	ECG	93060.P9215_03371	30S ribosomal protein S1	G3DSA:2.40.50.140	G3DSA:2.40.50.140	PR00681	Ribosomal protein S1 signature					J	J			COG0539	Ribosomal protein S1			SM00316	Ribosomal protein S1-like RNA-binding domain	PF00575	S1 RNA binding domain	PS50126	S1 domain profile.			SSF50249	SSF50249			---MNENSSQTIKELS-------EDQEIKNSSELDNDSAS-----QNEEDLSFEKNDIPSADSSSSRTN-ADFDNAGFTQEEFASLLGKYDYNFKPGDLVKGTVFALEPKGAMIDIGAKTAAFMPVQEVSINRVEGLNDVLQPSESREFFIMSEENEDGQLALSIRRIEYQRAWERVRQLQKEDATIYSEVFATNRGGALVRVEGLRGFIPGSHISARKIKDDLEGEYLPLKFLEVDEERNRLVLSHRRALVEKKMNRLEVGEVVVGSVKGIKPYGAFIDIGGVSGLLHISEISHEHIETPHNVLNVSDQMKVMIIDLDSERGRISLSTKALEPEPGDMLTDPQKVFSKAEEMAAKYKQMLFEQTDENEEIPTASTETV
	217	GC_00000634	HL+LL Core	SS2	56503	NA	93059.P9211_03471	30S ribosomal protein S1	G3DSA:2.40.50.140	G3DSA:2.40.50.140	PR00681	Ribosomal protein S1 signature			Coil	Coil	J	J			COG0539	Ribosomal protein S1			SM00316	Ribosomal protein S1-like RNA-binding domain	PF00575	S1 RNA binding domain	PS50126	S1 domain profile.			SSF50249	SSF50249			---MSENSSAPVTELE-------ESNADSQITSPENEQNADLADQAATHEESFNTEEIPSADDPSSRVKKYDFDGAGFSLEEFDSLLGKYDYNFKPGDIVNGTVFALETKGAMIDIGAKTAAFMPMQEVSINRVEGLSDVLQPSEIRQFFIMSEENEDGQLSLSIRRIEYQRAWERVRQLQKEDATIYSEVFATNRGGALVRVEGLRGFIPGSHISTRKAKEELVAEYLPLKFLEVDEERNRLVLSHRRALVERKMNRLEVGEVVVGAVRGIKPYGAFIDIGGVSGLLHISEISHEHIETPHSVLNVNDQMKVMIIDLDAERGRISLSTKALEPEPGDMLTDPQKVFDKAEEMAAKYKEMLLEQAEEGEN-PITSMEV-
	244	GC_00000634	HL+LL Core	SS35	58144	NA	93059.P9211_03471	30S ribosomal protein S1	G3DSA:2.40.50.140	G3DSA:2.40.50.140	PR00681	Ribosomal protein S1 signature			Coil	Coil	J	J			COG0539	Ribosomal protein S1			SM00316	Ribosomal protein S1-like RNA-binding domain	PF00575	S1 RNA binding domain	PS50126	S1 domain profile.			SSF50249	SSF50249			---MSENSSAPVTELE-------ESNADSQITSPENEQNADLADQAATHEESFNTEEIPSADDPSSRVKKYDFDGAGFSLEEFDSLLGKYDYNFKPGDIVNGTVFALETKGAMIDIGAKTAAFMPMQEVSINRVEGLSDVLQPSEIRQFFIMSEENEDGQLSLSIRRIEYQRAWERVRQLQKEDATIYSEVFATNRGGALVRVEGLRGFIPGSHISTRKAKEELVAEYLPLKFLEVDEERNRLVLSHRRALVERKMNRLEVGEVVVGAVRGIKPYGAFIDIGGVSGLLHISEISHEHIETPHSVLNVNDQMKVMIIDLDAERGRISLSTKALEPEPGDMLTDPQKVFDKAEEMAAKYKEMLLEQAEEGEN-PITSMEV-
	236	GC_00000634	HL+LL Core	SS51	58498	NA	93059.P9211_03471	30S ribosomal protein S1	G3DSA:2.40.50.140	G3DSA:2.40.50.140	PR00681	Ribosomal protein S1 signature			Coil	Coil	J	J			COG0539	Ribosomal protein S1			SM00316	Ribosomal protein S1-like RNA-binding domain	PF00575	S1 RNA binding domain	PS50126	S1 domain profile.			SSF50249	SSF50249			---MSENSSAPVTELE-------ESNADSQITSPENEQNADLADQAATHEESFNTEEIPSADDPSSRVKKYDFDGAGFSLEEFDSLLGKYDYNFKPGDIVNGTVFALETKGAMIDIGAKTAAFMPMQEVSINRVEGLSDVLQPSEIRQFFIMSEENEDGQLSLSIRRIEYQRAWERVRQLQKEDATIYSEVFATNRGGALVRVEGLRGFIPGSHISTRKAKEELVAEYLPLKFLEVDEERNRLVLSHRRALVERKMNRLEVGEVVVGAVRGIKPYGAFIDIGGVSGLLHISEISHEHIETPHSVLNVNDQMKVMIIDLDAERGRISLSTKALEPEPGDMLTDPQKVFDKAEEMAAKYKEMLLEQAEEGEN-PITSMEV-
	44055	GC_00000057	HL+LL Core	AS9601	1438	ECG	146891.A9601_14841	30S ribosomal protein S16	G3DSA:3.30.1320.10	G3DSA:3.30.1320.10			TIGR00002	S16: ribosomal protein bS16			J	J			COG0228	Ribosomal protein S16	MF_00385	30S ribosomal protein S16 [rpsP].			PF00886	Ribosomal protein S16					SSF54565	SSF54565	PS00732	Ribosomal protein S16 signature.	MIKLRLKRFGKKKEASFRIVACNSTSRRDGRPLQELGFYNPRTKETRLDTEALRTRLTQGAQPTDVVRTLLEKGGLLEKTERPSIAIGKAKLEKEKLAKAKT--------KDEENDNSKVESEGNEAES--
	44076	GC_00000057	HL+LL Core	CCMP1375	3178	NA	32051.SynWH7803_1730	30S ribosomal protein S16	G3DSA:3.30.1320.10	G3DSA:3.30.1320.10			TIGR00002	S16: ribosomal protein bS16	Coil	Coil	J	J			COG0228	Ribosomal protein S16	MF_00385	30S ribosomal protein S16 [rpsP].			PF00886	Ribosomal protein S16					SSF54565	SSF54565	PS00732	Ribosomal protein S16 signature.	MIKLRLKRFGKKREASFRLVACNSTSRRDGRPLQELGFYNPRTKETRLDTEALRLRLSQGAQPTDAVRSLLEKGGLLEKTIRPAELIGKSKQEELRKSEAKTSAKNKKANEEKANEEKVEESETLEASSEA
	44069	GC_00000057	HL+LL Core	EQPAC1	4397	ECG	59919.PMM1285	30S ribosomal protein S16	G3DSA:3.30.1320.10	G3DSA:3.30.1320.10			TIGR00002	S16: ribosomal protein bS16			J	J			COG0228	Ribosomal protein S16	MF_00385	30S ribosomal protein S16 [rpsP].			PF00886	Ribosomal protein S16					SSF54565	SSF54565	PS00732	Ribosomal protein S16 signature.	MIKLRLKRFGKKKEASFRIVACNSTSRRDGRPLQELGFYNPRTKETRLDTEALRIRLTQGAQPTDVVRTLLEKGGLLEKKVRPSIAIGKAKLEKEKIAKAKS--------KEAESDSKEAES---------
	44056	GC_00000057	HL+LL Core	GP2	6956	EAG	146891.A9601_14841	30S ribosomal protein S16	G3DSA:3.30.1320.10	G3DSA:3.30.1320.10			TIGR00002	S16: ribosomal protein bS16			J	J			COG0228	Ribosomal protein S16	MF_00385	30S ribosomal protein S16 [rpsP].			PF00886	Ribosomal protein S16					SSF54565	SSF54565	PS00732	Ribosomal protein S16 signature.	MIKLRLKRFGKKKEASFRIVACNSTSRRDGKPLQELGFYNPRTKETRLDTEALRKRLTQGAQPTDVVRTLLEKGGLLEKIERPSIAIGKAKLEKEKAAKAKS--------NDSESDTSKAESDSIQAES--
	44063	GC_00000057	HL+LL Core	LG	7531	NA	32051.SynWH7803_1730	30S ribosomal protein S16	G3DSA:3.30.1320.10	G3DSA:3.30.1320.10			TIGR00002	S16: ribosomal protein bS16	Coil	Coil	J	J			COG0228	Ribosomal protein S16	MF_00385	30S ribosomal protein S16 [rpsP].			PF00886	Ribosomal protein S16					SSF54565	SSF54565	PS00732	Ribosomal protein S16 signature.	MIKLRLKRFGKKREASFRLVACNSTSRRDGRPLQELGFYNPRTKETRLDTEALRLRLSQGAQPTDAVRSLLEKGGLLEKTIRPAELIGKSKQEELRKSEAKTSAKNKKANEEKANEEKVEESETLEASSEA
	44061	GC_00000057	HL+LL Core	MED4	10671	ECG	59919.PMM1285	30S ribosomal protein S16	G3DSA:3.30.1320.10	G3DSA:3.30.1320.10			TIGR00002	S16: ribosomal protein bS16			J	J			COG0228	Ribosomal protein S16	MF_00385	30S ribosomal protein S16 [rpsP].			PF00886	Ribosomal protein S16					SSF54565	SSF54565	PS00732	Ribosomal protein S16 signature.	MIKLRLKRFGKKKEASFRIVACNSTSRRDGRPLQELGFYNPRTKETRLDTEALRIRLTQGAQPTDVVRTLLEKGGLLEKKVRPSIAIGKAKLEKEKIAKAKS--------KEAESDSKEAES---------
	44054	GC_00000057	HL+LL Core	MIT9107	11541	ECG	146891.A9601_14841	30S ribosomal protein S16	G3DSA:3.30.1320.10	G3DSA:3.30.1320.10			TIGR00002	S16: ribosomal protein bS16			J	J			COG0228	Ribosomal protein S16	MF_00385	30S ribosomal protein S16 [rpsP].			PF00886	Ribosomal protein S16					SSF54565	SSF54565	PS00732	Ribosomal protein S16 signature.	MIKLRLKRFGKKKEASFRIVACNSTSRRDGRPLQELGFYNPRTKETRLDTEALRARLTQGAQPTDVVRTLLEKGGLLEKIERPSIAIGKTKLEKEKLSKAKI--------KDDQSDSNEAES---------
	44053	GC_00000057	HL+LL Core	MIT9116	13359	ECG	146891.A9601_14841	30S ribosomal protein S16	G3DSA:3.30.1320.10	G3DSA:3.30.1320.10			TIGR00002	S16: ribosomal protein bS16			J	J			COG0228	Ribosomal protein S16	MF_00385	30S ribosomal protein S16 [rpsP].			PF00886	Ribosomal protein S16					SSF54565	SSF54565	PS00732	Ribosomal protein S16 signature.	MIKLRLKRFGKKKEASFRIVACNSTSRRDGRPLQELGFYNPRTKETRLDTEALRARLTQGAQPTDVVRTLLEKGGLLEKIERPSIAIGKTKLEKEKLSKAKI--------KDDQSDSNEAES---------
	44057	GC_00000057	HL+LL Core	MIT9123	15805	ECG	146891.A9601_14841	30S ribosomal protein S16	G3DSA:3.30.1320.10	G3DSA:3.30.1320.10			TIGR00002	S16: ribosomal protein bS16			J	J			COG0228	Ribosomal protein S16	MF_00385	30S ribosomal protein S16 [rpsP].			PF00886	Ribosomal protein S16					SSF54565	SSF54565	PS00732	Ribosomal protein S16 signature.	MIKLRLKRFGKKKEASFRIVACNSTSRRDGRPLQELGFYNPRTKETRLDTEALRARLTQGAQPTDVVRTLLEKGGLLEKIERPSIAIGKTKLEKEKLSKAKI--------KDDQSDSNEAES---------
	44059	GC_00000057	HL+LL Core	MIT9201	17383	ECG	167546.P9301_14701	30S ribosomal protein S16	G3DSA:3.30.1320.10	G3DSA:3.30.1320.10			TIGR00002	S16: ribosomal protein bS16			J	J			COG0228	Ribosomal protein S16	MF_00385	30S ribosomal protein S16 [rpsP].			PF00886	Ribosomal protein S16					SSF54565	SSF54565	PS00732	Ribosomal protein S16 signature.	MIKLRLKRFGKKKEASFRIVACNSTSRRDGRPLQELGFYNPRTKETRLDTEALRARLTQGAQPTNVVRTLLEKGGLLEKIERPSIAIGKAKLEKEKAAKAKT--------KVDESDSNEAESK--------
	44066	GC_00000057	HL+LL Core	MIT9202	19162	ECG	93060.P9215_15131	30S ribosomal protein S16	G3DSA:3.30.1320.10	G3DSA:3.30.1320.10			TIGR00002	S16: ribosomal protein bS16			J	J			COG0228	Ribosomal protein S16	MF_00385	30S ribosomal protein S16 [rpsP].			PF00886	Ribosomal protein S16					SSF54565	SSF54565	PS00732	Ribosomal protein S16 signature.	MIKLRLKRFGKKKEASFRIVACNSTSRRDGRPLQELGFYNPRTKETRLDTEALRTRLTQGAQPTDVVRTLLEKGGLLEKIERPSIAIGKAKLEKEKKAKAKI--------KEEGNASSKTESGSNEAES--
	44071	GC_00000057	HL+LL Core	MIT9211	21987	NA	93059.P9211_13321	30S ribosomal protein S16	G3DSA:3.30.1320.10	G3DSA:3.30.1320.10			TIGR00002	S16: ribosomal protein bS16			J	J			COG0228	Ribosomal protein S16	MF_00385	30S ribosomal protein S16 [rpsP].			PF00886	Ribosomal protein S16					SSF54565	SSF54565	PS00732	Ribosomal protein S16 signature.	MIKLRLKRYGKKREASFRLVACNSTSRRDGRPLEELGFYNPRTKETRLDTEALRTRLSQGAQPTDAVRSLLEKGGLIEKTIRPAEIEGKKKQALARQSASKKAVKE----KTEESKGSEVDSETSTSAD--
	44068	GC_00000057	HL+LL Core	MIT9215	23958	ECG	93060.P9215_15131	30S ribosomal protein S16	G3DSA:3.30.1320.10	G3DSA:3.30.1320.10			TIGR00002	S16: ribosomal protein bS16			J	J			COG0228	Ribosomal protein S16	MF_00385	30S ribosomal protein S16 [rpsP].			PF00886	Ribosomal protein S16					SSF54565	SSF54565	PS00732	Ribosomal protein S16 signature.	MIKLRLKRFGKKKEASFRIVACNSTSRRDGRPLQELGFYNPRTKETRLDTEALRTRLTQGAQPTDVVRTLLEKGGLLEKIERPSIAIGKAKLEKEKKAKAKT--------KEEENEGSKTESGSNEAES--
	44067	GC_00000057	HL+LL Core	MIT9301	25844	ECG	167546.P9301_14701	30S ribosomal protein S16	G3DSA:3.30.1320.10	G3DSA:3.30.1320.10			TIGR00002	S16: ribosomal protein bS16			J	J			COG0228	Ribosomal protein S16	MF_00385	30S ribosomal protein S16 [rpsP].			PF00886	Ribosomal protein S16					SSF54565	SSF54565	PS00732	Ribosomal protein S16 signature.	MIKLRLKRFGKKKEASFRIVACNSTSRRDGRPLQELGFYNPRTKETRLDTEALRTRLTQGAQPTNVVRTLLEKGGLLEKTERPSIAIGKARLEKEKLAKAKT--------KDGDNDSSKAESESNEAET--
	44065	GC_00000057	HL+LL Core	MIT9302	27822	ECG	146891.A9601_14841	30S ribosomal protein S16	G3DSA:3.30.1320.10	G3DSA:3.30.1320.10			TIGR00002	S16: ribosomal protein bS16			J	J			COG0228	Ribosomal protein S16	MF_00385	30S ribosomal protein S16 [rpsP].			PF00886	Ribosomal protein S16					SSF54565	SSF54565	PS00732	Ribosomal protein S16 signature.	MIKLRLKRFGKKKEASFRIVACNSTSRRDGRPLQELGFYNPRTKETRLDTEALRTRLTQGAQPTDVVRTLLEKGGLLEKIERPSIAIGKAKLEKEKLAKAKT--------KDEENDSNEAES---------
	44046	GC_00000057	HL+LL Core	MIT9303	29990	ECG	64471.sync_0767	30S ribosomal protein S16	G3DSA:3.30.1320.10	G3DSA:3.30.1320.10			TIGR00002	S16: ribosomal protein bS16	Coil	Coil	J	J			COG0228	Ribosomal protein S16	MF_00385	30S ribosomal protein S16 [rpsP].			PF00886	Ribosomal protein S16					SSF54565	SSF54565	PS00732	Ribosomal protein S16 signature.	MIKLRLKRFGKKREASFRLVACNSTSRRDGRPLQELGFYNPRTKETRLDTEALRLRLSQGAQPTDAVRSLLEKGGLIEKTVRPAEVVGKAKQAEARKAGAKNV-------AKQAAEAKAEETPADNTEA--
	44075	GC_00000057	HL+LL Core	MIT9311	31277	ECG	167542.P9515_14461	30S ribosomal protein S16	G3DSA:3.30.1320.10	G3DSA:3.30.1320.10			TIGR00002	S16: ribosomal protein bS16			J	J			COG0228	Ribosomal protein S16					PF00886	Ribosomal protein S16					SSF54565	SSF54565	PS00732	Ribosomal protein S16 signature.	MIKLRLKRFGKKKEASFRIVACNSTSRRDGRPLQELGFYNPRTKK--------------------------------------------------------------------------------------
	44074	GC_00000057	HL+LL Core	MIT9311	31998	ECG	74546.PMT9312_1381	30S ribosomal protein S16	G3DSA:3.30.1320.10	G3DSA:3.30.1320.10			TIGR00002	S16: ribosomal protein bS16	Coil	Coil	J	J			COG0228	Ribosomal protein S16	MF_00385	30S ribosomal protein S16 [rpsP].			PF00886	Ribosomal protein S16					SSF54565	SSF54565	PS00732	Ribosomal protein S16 signature.	MIKLRLKRFGKKKEASFRIVACNSTSRRDGRPLQELGFYNPRTKETRLNTEALRIRLTQGAQPTDVVRNLLEKGGLLEKKERPSIAIGKAKLEKEKVAKAKI--------KNEENDSSKAESDSNEAES--
	44060	GC_00000057	HL+LL Core	MIT9312	34313	ECG	74546.PMT9312_1381	30S ribosomal protein S16	G3DSA:3.30.1320.10	G3DSA:3.30.1320.10			TIGR00002	S16: ribosomal protein bS16	Coil	Coil	J	J			COG0228	Ribosomal protein S16	MF_00385	30S ribosomal protein S16 [rpsP].			PF00886	Ribosomal protein S16					SSF54565	SSF54565	PS00732	Ribosomal protein S16 signature.	MIKLRLKRFGKKKEASFRIVACNSTSRRDGRPLQELGFYNPRTKETRLNTEALRIRLTQGAQPTDVVRNLLEKGGLLEKKERPSIAIGKAKLEKEKVAKAKI--------KNEENDSSKAESDSNEAES--
	44052	GC_00000057	HL+LL Core	MIT9313	35158	ECG	64471.sync_0767	30S ribosomal protein S16	G3DSA:3.30.1320.10	G3DSA:3.30.1320.10			TIGR00002	S16: ribosomal protein bS16	Coil	Coil	J	J			COG0228	Ribosomal protein S16	MF_00385	30S ribosomal protein S16 [rpsP].			PF00886	Ribosomal protein S16					SSF54565	SSF54565	PS00732	Ribosomal protein S16 signature.	MIKLRLKRFGKKREASFRLVACNSTSRRDGRPLQELGFYNPRTKETRLDTEALRLRLSQGAQPTDAVRSLLEKGGLIEKTVRPAEVVGKAKQAEARKAAAKNV-------AKQAAEAKAEETPADNTEA--
	44051	GC_00000057	HL+LL Core	MIT9314	38997	ECG	146891.A9601_14841	30S ribosomal protein S16	G3DSA:3.30.1320.10	G3DSA:3.30.1320.10			TIGR00002	S16: ribosomal protein bS16	Coil	Coil	J	J			COG0228	Ribosomal protein S16	MF_00385	30S ribosomal protein S16 [rpsP].			PF00886	Ribosomal protein S16					SSF54565	SSF54565	PS00732	Ribosomal protein S16 signature.	MIKLRLKRFGKKKEASFRIVACNSTSRRDGRPLQELGFYNPRTKETRLDTEALRTRLTQGAQPTNVVRTLLEKGGLLEKTERPSIAIGKAKLEKEKLAKAKT--------K-EENDSSKTESEGNEAES--
	44058	GC_00000057	HL+LL Core	MIT9321	40908	ECG	146891.A9601_14841	30S ribosomal protein S16	G3DSA:3.30.1320.10	G3DSA:3.30.1320.10			TIGR00002	S16: ribosomal protein bS16	Coil	Coil	J	J			COG0228	Ribosomal protein S16	MF_00385	30S ribosomal protein S16 [rpsP].			PF00886	Ribosomal protein S16					SSF54565	SSF54565	PS00732	Ribosomal protein S16 signature.	MIKLRLKRFGKKKEASFRIVACNSTSRRDGRPLQELGFYNPRTKETRLDTEALRTRLTQGAQPTDVVRTLLEKGGLLEKKERPSIAIGKAKLEKEKLAKAKT--------KDEENDSSKAESETNEAESK-
	44049	GC_00000057	HL+LL Core	MIT9322	42130	ECG	146891.A9601_14841	30S ribosomal protein S16	G3DSA:3.30.1320.10	G3DSA:3.30.1320.10			TIGR00002	S16: ribosomal protein bS16	Coil	Coil	J	J			COG0228	Ribosomal protein S16	MF_00385	30S ribosomal protein S16 [rpsP].			PF00886	Ribosomal protein S16					SSF54565	SSF54565	PS00732	Ribosomal protein S16 signature.	MIKLRLKRFGKKKEASFRIVACNSTSRRDGRPLQELGFYNPRTKETRLDTEALRTRLTQGAQPTDVVRTLLEKGGLLEKKERPSIAIGKAKLEKEKLAKAKT--------KDEENDSSKAESETNEAESK-
	44070	GC_00000057	HL+LL Core	MIT9401	43695	ECG	146891.A9601_14841	30S ribosomal protein S16	G3DSA:3.30.1320.10	G3DSA:3.30.1320.10			TIGR00002	S16: ribosomal protein bS16	Coil	Coil	J	J			COG0228	Ribosomal protein S16	MF_00385	30S ribosomal protein S16 [rpsP].			PF00886	Ribosomal protein S16					SSF54565	SSF54565	PS00732	Ribosomal protein S16 signature.	MIKLRLKRFGKKKEASFRIVACNSTSRRDGRPLQELGFYNPRTKETRLDTEALRTRLTQGAQPTDVVRTLLEKGGLLEKKERPSIAIGKAKLEKEKLAKAKT--------KDEENDSSKAESETNEAESK-
	44050	GC_00000057	HL+LL Core	MIT9515	46321	ECG	167542.P9515_14461	30S ribosomal protein S16	G3DSA:3.30.1320.10	G3DSA:3.30.1320.10			TIGR00002	S16: ribosomal protein bS16			J	J			COG0228	Ribosomal protein S16	MF_00385	30S ribosomal protein S16 [rpsP].			PF00886	Ribosomal protein S16					SSF54565	SSF54565	PS00732	Ribosomal protein S16 signature.	MIKLRLKRFGKKKEASFRIVACNSTSRRDGRPLQELGFYNPRTKETRLDTEALRIRLTQGAQPTDVVRTLLEKGGLLEKKVRPSIAIGKANLEKEKIAKAKS--------KESESANKEAES---------
	44073	GC_00000057	HL+LL Core	NATL1A	48335	ECG	59931.WH7805_05541	30S ribosomal protein S16	G3DSA:3.30.1320.10	G3DSA:3.30.1320.10			TIGR00002	S16: ribosomal protein bS16			J	J			COG0228	Ribosomal protein S16	MF_00385	30S ribosomal protein S16 [rpsP].			PF00886	Ribosomal protein S16					SSF54565	SSF54565	PS00732	Ribosomal protein S16 signature.	MIKLRLKRFGKKRETSFRLVACNSTSRRDGRPLQELGFYNPRTKETRLDTEALRTRLGQGAQPTDAVRTLLEKGGLLEKKVRPAEVLGKQKQEKERSAKKK---------DATASETSE------------
	44048	GC_00000057	HL+LL Core	NATL2A	50308	ECG	59931.WH7805_05541	30S ribosomal protein S16	G3DSA:3.30.1320.10	G3DSA:3.30.1320.10			TIGR00002	S16: ribosomal protein bS16			J	J			COG0228	Ribosomal protein S16	MF_00385	30S ribosomal protein S16 [rpsP].			PF00886	Ribosomal protein S16					SSF54565	SSF54565	PS00732	Ribosomal protein S16 signature.	MIKLRLKRFGKKRETSFRLVACNSTSRRDGRPLQELGFYNPRTKETRLDTEALRTRLGQGAQPTDAVRTLLEKGGLLEKKVRPAEVLGKQKQEKERSAKKK---------DAAASETSE------------
	44047	GC_00000057	HL+LL Core	PAC1	51460	ECG	59931.WH7805_05541	30S ribosomal protein S16	G3DSA:3.30.1320.10	G3DSA:3.30.1320.10			TIGR00002	S16: ribosomal protein bS16			J	J			COG0228	Ribosomal protein S16	MF_00385	30S ribosomal protein S16 [rpsP].			PF00886	Ribosomal protein S16					SSF54565	SSF54565	PS00732	Ribosomal protein S16 signature.	MIKLRLKRFGKKRETSFRLVACNSTSRRDGRPLQELGFYNPRTKETRLDTEALRTRLGQGAQPTDAVRTLLEKGGLLEKKVRPAEVLGKQKQEKERSAKKK---------DAAASETSE------------
	44062	GC_00000057	HL+LL Core	SB	54477	ECG	146891.A9601_14841	30S ribosomal protein S16	G3DSA:3.30.1320.10	G3DSA:3.30.1320.10			TIGR00002	S16: ribosomal protein bS16	Coil	Coil	J	J			COG0228	Ribosomal protein S16	MF_00385	30S ribosomal protein S16 [rpsP].			PF00886	Ribosomal protein S16					SSF54565	SSF54565	PS00732	Ribosomal protein S16 signature.	MIKLRLKRFGKKKEASFRIVACNSTSRRDGRPLQELGFYNPRTKETRLDTEALRTRLTQGAQPTGVVRTLLEKGGLLEKTERPSISIGKAKLEKEKLAKAKT--------KEEENDSSKVESEGNEA----
	44045	GC_00000057	HL+LL Core	SS2	54995	NA	32051.SynWH7803_1730	30S ribosomal protein S16	G3DSA:3.30.1320.10	G3DSA:3.30.1320.10			TIGR00002	S16: ribosomal protein bS16	Coil	Coil	J	J			COG0228	Ribosomal protein S16	MF_00385	30S ribosomal protein S16 [rpsP].			PF00886	Ribosomal protein S16					SSF54565	SSF54565	PS00732	Ribosomal protein S16 signature.	MIKLRLKRFGKKREASFRLVACNSTSRRDGRPLQELGFYNPRTKETRLDTEALRLRLSQGAQPTDAVRSLLEKGGLLEKTIRPAELIGKSKQEELRKSEAKTSAKNKKANEEKANEEKVEESETLEASSEA
	44072	GC_00000057	HL+LL Core	SS35	56704	NA	32051.SynWH7803_1730	30S ribosomal protein S16	G3DSA:3.30.1320.10	G3DSA:3.30.1320.10			TIGR00002	S16: ribosomal protein bS16	Coil	Coil	J	J			COG0228	Ribosomal protein S16	MF_00385	30S ribosomal protein S16 [rpsP].			PF00886	Ribosomal protein S16					SSF54565	SSF54565	PS00732	Ribosomal protein S16 signature.	MIKLRLKRFGKKREASFRLVACNSTSRRDGRPLQELGFYNPRTKETRLDTEALRLRLSQGAQPTDAVRSLLEKGGLLEKTIRPAELIGKSKQEELRKSEAKTSAKNKKANEEKANEEKVEESETLEASSEA
	44064	GC_00000057	HL+LL Core	SS51	58935	NA	32051.SynWH7803_1730	30S ribosomal protein S16	G3DSA:3.30.1320.10	G3DSA:3.30.1320.10			TIGR00002	S16: ribosomal protein bS16	Coil	Coil	J	J			COG0228	Ribosomal protein S16	MF_00385	30S ribosomal protein S16 [rpsP].			PF00886	Ribosomal protein S16					SSF54565	SSF54565	PS00732	Ribosomal protein S16 signature.	MIKLRLKRFGKKREASFRLVACNSTSRRDGRPLQELGFYNPRTKETRLDTEALRLRLSQGAQPTDAVRSLLEKGGLLEKTIRPAELIGKSKQEELRKSEAKTSAKNKKANEEKANEEKVEESETLEASSEA
	10000	GC_00000143	HL+LL Core	AS9601	787	ECG	146891.A9601_08141	30S ribosomal protein S2	G3DSA:3.40.50.10490	G3DSA:3.40.50.10490	PR00395	Ribosomal protein S2 signature	TIGR01011	rpsB_bact: ribosomal protein uS2			J	J			COG0052	Ribosomal protein S2	MF_00291_B	30S ribosomal protein S2 [rpsB].			PF00318	Ribosomal protein S2					SSF52313	SSF52313	PS00962	Ribosomal protein S2 signature 1.	----------MAVVSLSEMMEAGAHFGHQTRRWNPKMSKYIYCARNGVHIIDLVKTALCMNNAYKWTRNAAKSGKRFLFVGTKKQASDVVAQEATRCGAAYVNQRWLGGMLTNWTTMKARIERLKDLERMESSGSIAMRPKKEAAVLRRELERLQKYLGGLKGMRRLPDVVVLVDQRRESNAVLEARKLDISLVSMLDTNCDPDLCEVPIPCNDDAVRSVQLILGRLADAINEGRKGSNAERKN-----
	10020	GC_00000143	HL+LL Core	CCMP1375	2652	NA	167539.Pro0825	30S ribosomal protein S2	G3DSA:3.40.50.10490	G3DSA:3.40.50.10490	PR00395	Ribosomal protein S2 signature	TIGR01011	rpsB_bact: ribosomal protein uS2			J	J			COG0052	Ribosomal protein S2	MF_00291_B	30S ribosomal protein S2 [rpsB].			PF00318	Ribosomal protein S2					SSF52313	SSF52313	PS00962	Ribosomal protein S2 signature 1.	----------MAVVTLSEMMEAGAHFGHQTRRWNPKMSRYIYCARNGVHIIDLVKTAVCMNNAYKWTRNAAKSGKRFLFVGTKKQASEVVAQEAARCGASYVNQRWLGGMLTNWTTMKARIDRLKDLERMESSGAIAMRPKKEASVLRHELERLQKYLGGLKGMKRLPDVVVLVDQRRETNAVLEARKLDIPLVSMLDTNCDPDLCEVPIPCNDDAVRSVQLVLGRIADAINEGRHGSNDQRARQKYS-
	10014	GC_00000143	HL+LL Core	EQPAC1	4994	ECG	59919.PMM0753	30S ribosomal protein S2	G3DSA:3.40.50.10490	G3DSA:3.40.50.10490	PR00395	Ribosomal protein S2 signature	TIGR01011	rpsB_bact: ribosomal protein uS2			J	J			COG0052	Ribosomal protein S2	MF_00291_B	30S ribosomal protein S2 [rpsB].			PF00318	Ribosomal protein S2					SSF52313	SSF52313	PS00962	Ribosomal protein S2 signature 1.	----------MAVVSLSEMMEAGAHFGHQTRRWNPKMSKYIYCARNGVHIIDLVKTALCMNNAYKWTRNAAKSGKRFLFVGTKKQASDVVAQEAVRCGAAYVNQRWLGGMLTNWTTMKARIERLKDLERMESSGAIAMRPKKEAAVLRRELERLQKYLGGLKGMRRLPDVVVLVDQRRESNAVLEARKLDISLVSMLDTNCDPDLCEVPIPCNDDAVRSVQLILGRLADAINEGRKGSNDQRKN-----
	10001	GC_00000143	HL+LL Core	GP2	6319	ECG	146891.A9601_08141	30S ribosomal protein S2	G3DSA:3.40.50.10490	G3DSA:3.40.50.10490	PR00395	Ribosomal protein S2 signature	TIGR01011	rpsB_bact: ribosomal protein uS2			J	J			COG0052	Ribosomal protein S2	MF_00291_B	30S ribosomal protein S2 [rpsB].			PF00318	Ribosomal protein S2					SSF52313	SSF52313	PS00962	Ribosomal protein S2 signature 1.	----------MAVVSLSEMMEAGAHFGHQTRRWNPKMSKYIYCARNGVHIIDLVKTALCMNNAYKWTRNAAKSGKRFLFVGTKKQASDVVAQEATRCGAAYVNQRWLGGMLTNWTTMKARIERLKDLERMESSGSIAMRPKKEAAVLRRELERLQKYLGGLKGMRRLPDVVVLVDQRRESNAVLEARKLDISLVSMLDTNCDPDLCEVPIPCNDDAVRSVQLILGRLADAINEGRKGSNAERKN-----
	10008	GC_00000143	HL+LL Core	LG	8153	NA	167539.Pro0825	30S ribosomal protein S2	G3DSA:3.40.50.10490	G3DSA:3.40.50.10490	PR00395	Ribosomal protein S2 signature	TIGR01011	rpsB_bact: ribosomal protein uS2			J	J			COG0052	Ribosomal protein S2	MF_00291_B	30S ribosomal protein S2 [rpsB].			PF00318	Ribosomal protein S2					SSF52313	SSF52313	PS00962	Ribosomal protein S2 signature 1.	----------MAVVTLSEMMEAGAHFGHQTRRWNPKMSRYIYCARNGVHIIDLVKTAVCMNNAYKWTRNAAKSGKRFLFVGTKKQASEVVAQEAARCGASYVNQRWLGGMLTNWTTMKARIDRLKDLERMESSGAIAMRPKKEASVLRHELERLQKYLGGLKGMKRLPDVVVLVDQRRETNAVLEARKLDIPLVSMLDTNCDPDLCEVPIPCNDDAVRSVQLVLGRIADAINEGRHGSNDQRARQKYS-
	10006	GC_00000143	HL+LL Core	MED4	10066	ECG	59919.PMM0753	30S ribosomal protein S2	G3DSA:3.40.50.10490	G3DSA:3.40.50.10490	PR00395	Ribosomal protein S2 signature	TIGR01011	rpsB_bact: ribosomal protein uS2			J	J			COG0052	Ribosomal protein S2	MF_00291_B	30S ribosomal protein S2 [rpsB].			PF00318	Ribosomal protein S2					SSF52313	SSF52313	PS00962	Ribosomal protein S2 signature 1.	----------MAVVSLSEMMEAGAHFGHQTRRWNPKMSKYIYCARNGVHIIDLVKTALCMNNAYKWTRNAAKSGKRFLFVGTKKQASDVVAQEAVRCGAAYVNQRWLGGMLTNWTTMKARIERLKDLERMESSGAIAMRPKKEAAVLRRELERLQKYLGGLKGMRRLPDVVVLVDQRRESNAVLEARKLDISLVSMLDTNCDPDLCEVPIPCNDDAVRSVQLILGRLADAINEGRKGSNDQRKN-----
	9999	GC_00000143	HL+LL Core	MIT9107	12573	ECG	146891.A9601_08141	30S ribosomal protein S2	G3DSA:3.40.50.10490	G3DSA:3.40.50.10490	PR00395	Ribosomal protein S2 signature	TIGR01011	rpsB_bact: ribosomal protein uS2			J	J			COG0052	Ribosomal protein S2	MF_00291_B	30S ribosomal protein S2 [rpsB].			PF00318	Ribosomal protein S2					SSF52313	SSF52313	PS00962	Ribosomal protein S2 signature 1.	----------MAVVSLSEMMEAGAHFGHQTRRWNPKMSKYIYCARNGVHIIDLVKTALCMNNAYKWTRNAAKSGKRFLFVGTKKQASDVVAQEATRCGAAYVNQRWLGGMLTNWTTMKARIERLKELERMESSGSIAMRPKKEAAVLRRELERLQKYLGGLKGMRRLPDVVVLVDQRRESNAVLEARKLDISLVSMLDTNCDPDLCEVPIPCNDDAVRSVQLILGRLADAINEGRKGSNAERKN-----
	9998	GC_00000143	HL+LL Core	MIT9116	13726	ECG	146891.A9601_08141	30S ribosomal protein S2	G3DSA:3.40.50.10490	G3DSA:3.40.50.10490	PR00395	Ribosomal protein S2 signature	TIGR01011	rpsB_bact: ribosomal protein uS2			J	J			COG0052	Ribosomal protein S2	MF_00291_B	30S ribosomal protein S2 [rpsB].			PF00318	Ribosomal protein S2					SSF52313	SSF52313	PS00962	Ribosomal protein S2 signature 1.	----------MAVVSLSEMMEAGAHFGHQTRRWNPKMSKYIYCARNGVHIIDLVKTALCMNNAYKWTRNAAKSGKRFLFVGTKKQASDVVAQEATRCGAAYVNQRWLGGMLTNWTTMKARIERLKELERMESSGSIAMRPKKEAAVLRRELERLQKYLGGLKGMRRLPDVVVLVDQRRESNAVLEARKLDISLVSMLDTNCDPDLCEVPIPCNDDAVRSVQLILGRLADAINEGRKGSNAERKN-----
	10002	GC_00000143	HL+LL Core	MIT9123	16632	ECG	146891.A9601_08141	30S ribosomal protein S2	G3DSA:3.40.50.10490	G3DSA:3.40.50.10490	PR00395	Ribosomal protein S2 signature	TIGR01011	rpsB_bact: ribosomal protein uS2			J	J			COG0052	Ribosomal protein S2	MF_00291_B	30S ribosomal protein S2 [rpsB].			PF00318	Ribosomal protein S2					SSF52313	SSF52313	PS00962	Ribosomal protein S2 signature 1.	----------MAVVSLSEMMEAGAHFGHQTRRWNPKMSKYIYCARNGVHIIDLVKTALCMNNAYKWTRNAAKSGKRFLFVGTKKQASDVVAQEATRCGAAYVNQRWLGGMLTNWTTMKARIERLKELERMESSGSIAMRPKKEAAVLRRELERLQKYLGGLKGMRRLPDVVVLVDQRRESNAVLEARKLDISLVSMLDTNCDPDLCEVPIPCNDDAVRSVQLILGRLADAINEGRKGSNAERKN-----
	10004	GC_00000143	HL+LL Core	MIT9201	17992	ECG	146891.A9601_08141	30S ribosomal protein S2	G3DSA:3.40.50.10490	G3DSA:3.40.50.10490	PR00395	Ribosomal protein S2 signature	TIGR01011	rpsB_bact: ribosomal protein uS2			J	J			COG0052	Ribosomal protein S2	MF_00291_B	30S ribosomal protein S2 [rpsB].			PF00318	Ribosomal protein S2					SSF52313	SSF52313	PS00962	Ribosomal protein S2 signature 1.	----------MAVVSLSEMMEAGAHFGHQTRRWNPKMSKYIYCARNGVHIIDLVKTALCMNNAYKWTRNAAKSGKRFLFVGTKKQASDVVAQEATRCGAAYVNQRWLGGMLTNWTTMKARIERLKDLERMESSGSIAMRPKKEAAVLRRELERLQKYLGGLKGMRRLPDVVVLVDQRRESNAVLEARKLDISLVSMLDTNCDPDLCEVPIPCNDDAVRSVQLILGRLADAINEGRKSNNA---------
	10011	GC_00000143	HL+LL Core	MIT9202	20453	ECG	146891.A9601_08141	30S ribosomal protein S2	G3DSA:3.40.50.10490	G3DSA:3.40.50.10490	PR00395	Ribosomal protein S2 signature	TIGR01011	rpsB_bact: ribosomal protein uS2			J	J			COG0052	Ribosomal protein S2	MF_00291_B	30S ribosomal protein S2 [rpsB].			PF00318	Ribosomal protein S2					SSF52313	SSF52313	PS00962	Ribosomal protein S2 signature 1.	----------MAVVSLSEMMEAGAHFGHQTRRWNPKMSKYIYCARNGVHIIDLVKTALCMNDAYKWTRNAAKSGKRFLFVGTKKQASDVVAQEATRCGAAYVNQRWLGGMLTNWTTMKARIERLKDLERMESSGSIAMRPKKEAAVLRRELERLQKYLGGLKSMRRLPDVVVLVDQRRESNAVLEARKLDISLVSMLDTNCDPDLCEVPIPCNDDAVRSVQLILGRLADAINEGRKGSNAERKN-----
	10016	GC_00000143	HL+LL Core	MIT9211	21687	NA	93059.P9211_10101	30S ribosomal protein S2	G3DSA:3.40.50.10490	G3DSA:3.40.50.10490	PR00395	Ribosomal protein S2 signature	TIGR01011	rpsB_bact: ribosomal protein uS2			J	J			COG0052	Ribosomal protein S2	MF_00291_B	30S ribosomal protein S2 [rpsB].			PF00318	Ribosomal protein S2					SSF52313	SSF52313			------------------MMEAGAHFGHQTRRWNPKMSRYIYCARNGVHIIDLVKTAVCMNSAYKWTRNAAKSGKRFLFVGTKKQASEVVALEANRCGASYVNQRWLGGMLTNWTTMKARIDRLKDLERMESSGAIAMRPKKEASVLRHELERLQKYLGGLKGMKRLPDVVVLVDQRRETNAVLEARKLDIPLVSMLDTNCDPDLCEVPIPCNDDAVRSVQLILGRLADAINEGRHGSNEHRGGQRLK-
	10013	GC_00000143	HL+LL Core	MIT9215	23302	ECG	146891.A9601_08141	30S ribosomal protein S2	G3DSA:3.40.50.10490	G3DSA:3.40.50.10490	PR00395	Ribosomal protein S2 signature	TIGR01011	rpsB_bact: ribosomal protein uS2			J	J			COG0052	Ribosomal protein S2	MF_00291_B	30S ribosomal protein S2 [rpsB].			PF00318	Ribosomal protein S2					SSF52313	SSF52313	PS00962	Ribosomal protein S2 signature 1.	----------MAVVSLSEMMEAGAHFGHQTRRWNPKMSKYIYCARNGVHIIDLVKTALCMNNAYKWTRNAAKSGKRFLFVGTKKQASDVVAQEATRCGAAYVNQRWLGGMLTNWTTMKARIERLKDLERMESSGSIAMRPKKEAAVLRRELERLQKYLGGLKGMRRLPDVVVLVDQRRESNAVLEARKLDISLVSMLDTNCDPDLCEVPIPCNDDAVRSVQLILGRLADAINEGRKGSNAERKN-----
	10012	GC_00000143	HL+LL Core	MIT9301	25212	ECG	146891.A9601_08141	30S ribosomal protein S2	G3DSA:3.40.50.10490	G3DSA:3.40.50.10490	PR00395	Ribosomal protein S2 signature	TIGR01011	rpsB_bact: ribosomal protein uS2			J	J			COG0052	Ribosomal protein S2	MF_00291_B	30S ribosomal protein S2 [rpsB].			PF00318	Ribosomal protein S2					SSF52313	SSF52313	PS00962	Ribosomal protein S2 signature 1.	----------MAVVSLSEMMEAGAHFGHQTRRWNPKMSKYIYCARNGVHIIDLVKTALCMNNAYKWTRNAAKSGKRFLFVGTKKQASDVVAQEATRCGAAYVNQRWLGGMLTNWTTMKARIERLKDLERMESSGSIAMRPKKEAAVLRRELERLQKYLGGLKGMRRLPDVVVLVDQRRESNAVLEARKLDISLVSMLDTNCDPDLCEVPIPCNDDAVRSVQLILGRLADAINEGRKGSNAERKN-----
	10010	GC_00000143	HL+LL Core	MIT9302	26659	ECG	146891.A9601_08141	30S ribosomal protein S2	G3DSA:3.40.50.10490	G3DSA:3.40.50.10490	PR00395	Ribosomal protein S2 signature	TIGR01011	rpsB_bact: ribosomal protein uS2			J	J			COG0052	Ribosomal protein S2	MF_00291_B	30S ribosomal protein S2 [rpsB].			PF00318	Ribosomal protein S2					SSF52313	SSF52313	PS00962	Ribosomal protein S2 signature 1.	----------MAVVSLSEMMEAGAHFGHQTRRWNPKMSKYIYCARNGVHIIDLVKTALCMNNAYKWTRNAAKSGKRFLFVGTKKQASDVVAQEATRCGAAYVNQRWLGGMLTNWTTMKARIERLKDLERMESSGSIAMRPKKEAAVLRRELERLQKYLGGLKGMRRLPDVVVLVDQRRESNAVLEARKLDISLVSMLDTNCDPDLCEVPIPCNDDAVRSVQLILGRLADAINEGRKGSNADKN------
	9991	GC_00000143	HL+LL Core	MIT9303	29728	ECG	74547.PMT0584	30S ribosomal protein S2	G3DSA:3.40.50.10490	G3DSA:3.40.50.10490	PR00395	Ribosomal protein S2 signature	TIGR01011	rpsB_bact: ribosomal protein uS2			J	J			COG0052	Ribosomal protein S2	MF_00291_B	30S ribosomal protein S2 [rpsB].			PF00318	Ribosomal protein S2					SSF52313	SSF52313	PS00962	Ribosomal protein S2 signature 1.	#NAME?
	10019	GC_00000143	HL+LL Core	MIT9311	32607	ECG	74546.PMT9312_0761	30S ribosomal protein S2	G3DSA:3.40.50.10490	G3DSA:3.40.50.10490	PR00395	Ribosomal protein S2 signature	TIGR01011	rpsB_bact: ribosomal protein uS2			J	J			COG0052	Ribosomal protein S2	MF_00291_B	30S ribosomal protein S2 [rpsB].			PF00318	Ribosomal protein S2					SSF52313	SSF52313	PS00962	Ribosomal protein S2 signature 1.	----------MAVVSLSEMMEAGAHFGHQTRRWNPKMSKYIYCARNGVHIIDLVKTALCMNNAYKWTRNAAKGGKRFLFVGTKKQASDVVAQEATRCGAAYVNQRWLGGMLTNWTTMKARIERLKDLERMESSGSIAMRPKKEAAVLRRELERLQKYLGGLKGMRRLPDVVVLVDQRRETNAVLEARKLDISLVSMLDTNCDPDLCEVPIPCNDDAVRSVQLILGRLADAINEGRKASNNEKN------
	10005	GC_00000143	HL+LL Core	MIT9312	33648	ECG	74546.PMT9312_0761	30S ribosomal protein S2	G3DSA:3.40.50.10490	G3DSA:3.40.50.10490	PR00395	Ribosomal protein S2 signature	TIGR01011	rpsB_bact: ribosomal protein uS2			J	J			COG0052	Ribosomal protein S2	MF_00291_B	30S ribosomal protein S2 [rpsB].			PF00318	Ribosomal protein S2					SSF52313	SSF52313	PS00962	Ribosomal protein S2 signature 1.	----------MAVVSLSEMMEAGAHFGHQTRRWNPKMSKYIYCARNGVHIIDLVKTALCMNNAYKWTRNAAKGGKRFLFVGTKKQASDVVAQEATRCGAAYVNQRWLGGMLTNWTTMKARIERLKDLERMESSGSIAMRPKKEAAVLRRELERLQKYLGGLKGMRRLPDVVVLVDQRRETNAVLEARKLDISLVSMLDTNCDPDLCEVPIPCNDDAVRSVQLILGRLADAINEGRKASNNEKN------
	9997	GC_00000143	HL+LL Core	MIT9313	35418	ECG	74547.PMT0584	30S ribosomal protein S2	G3DSA:3.40.50.10490	G3DSA:3.40.50.10490	PR00395	Ribosomal protein S2 signature	TIGR01011	rpsB_bact: ribosomal protein uS2			J	J			COG0052	Ribosomal protein S2	MF_00291_B	30S ribosomal protein S2 [rpsB].			PF00318	Ribosomal protein S2					SSF52313	SSF52313	PS00962	Ribosomal protein S2 signature 1.	#NAME?
	9996	GC_00000143	HL+LL Core	MIT9314	37685	ECG	146891.A9601_08141	30S ribosomal protein S2	G3DSA:3.40.50.10490	G3DSA:3.40.50.10490	PR00395	Ribosomal protein S2 signature	TIGR01011	rpsB_bact: ribosomal protein uS2			J	J			COG0052	Ribosomal protein S2	MF_00291_B	30S ribosomal protein S2 [rpsB].			PF00318	Ribosomal protein S2					SSF52313	SSF52313	PS00962	Ribosomal protein S2 signature 1.	----------MAVVSLSEMMEAGAHFGHQTRRWNPKMSRYIYCARNGVHIIDLVKTALCMNNAYKWTRNAAKSGKRFLFVGTKKQASDVVAQEATRCGAAYVNQRWLGGMLTNWTTMKARIERLKDLERMESSGSIAMRPKKEAAVLRRELERLQKYLGGLKGMRRLPDVVVLVDQRRESNAVLEARKLDISLVSMLDTNCDPDLCEVPIPCNDDAVRSVQLILGRLADAINEGRKGSNAERKN-----
	10003	GC_00000143	HL+LL Core	MIT9321	39581	ECG	146891.A9601_08141	30S ribosomal protein S2	G3DSA:3.40.50.10490	G3DSA:3.40.50.10490	PR00395	Ribosomal protein S2 signature	TIGR01011	rpsB_bact: ribosomal protein uS2			J	J			COG0052	Ribosomal protein S2	MF_00291_B	30S ribosomal protein S2 [rpsB].			PF00318	Ribosomal protein S2					SSF52313	SSF52313	PS00962	Ribosomal protein S2 signature 1.	----------MAVVSLSEMMEAGAHFGHQTRRWNPKMSKYIYCARNGVHIIDLVKTALCMNNAYKWTRNAAKSGKRFLFVGTKKQASDVVAQEATRCGAAYVNQRWLGGMLTNWTTMKARIERLKDLERMESSGSIAMRPKKEAAVLRRELERLQKYLGGLKGMRRLPDVVVLVDQRRESNAVLEARKLDISLVSMLDTNCDPDLCEVPIPCNDDAVRSVQLILGRLADAINEGRKGSNAERKN-----
	9994	GC_00000143	HL+LL Core	MIT9322	42586	ECG	146891.A9601_08141	30S ribosomal protein S2	G3DSA:3.40.50.10490	G3DSA:3.40.50.10490	PR00395	Ribosomal protein S2 signature	TIGR01011	rpsB_bact: ribosomal protein uS2			J	J			COG0052	Ribosomal protein S2	MF_00291_B	30S ribosomal protein S2 [rpsB].			PF00318	Ribosomal protein S2					SSF52313	SSF52313	PS00962	Ribosomal protein S2 signature 1.	----------MAVVSLSEMMEAGAHFGHQTRRWNPKMSKYIYCARNGVHIIDLVKTALCMNNAYKWTRNAAKSGKRFLFVGTKKQASDVVAQEATRCGAAYVNQRWLGGMLTNWTTMKARIERLKDLERMESSGSIAMRPKKEAAVLRRELERLQKYLGGLKGMRRLPDVVVLVDQRRESNAVLEARKLDISLVSMLDTNCDPDLCEVPIPCNDDAVRSVQLILGRLADAINEGRKGSNAERKN-----
	10015	GC_00000143	HL+LL Core	MIT9401	44448	ECG	146891.A9601_08141	30S ribosomal protein S2	G3DSA:3.40.50.10490	G3DSA:3.40.50.10490	PR00395	Ribosomal protein S2 signature	TIGR01011	rpsB_bact: ribosomal protein uS2			J	J			COG0052	Ribosomal protein S2	MF_00291_B	30S ribosomal protein S2 [rpsB].			PF00318	Ribosomal protein S2					SSF52313	SSF52313	PS00962	Ribosomal protein S2 signature 1.	----------MAVVSLSEMMEAGAHFGHQTRRWNPKMSKYIYCARNGVHIIDLVKTALCMNNAYKWTRNAAKSGKRFLFVGTKKQASDVVAQEATRCGAAYVNQRWLGGMLTNWTTMKARIERLKDLERMESSGSIAMRPKKEAAVLRRELERLQKYLGGLKGMRRLPDVVVLVDQRRESNAVLEARKLDISLVSMLDTNCDPDLCEVPIPCNDDAVRSVQLILGRLADAINEGRKGSNAERKN-----
	9995	GC_00000143	HL+LL Core	MIT9515	45723	ECG	167542.P9515_08311	30S ribosomal protein S2	G3DSA:3.40.50.10490	G3DSA:3.40.50.10490	PR00395	Ribosomal protein S2 signature	TIGR01011	rpsB_bact: ribosomal protein uS2			J	J			COG0052	Ribosomal protein S2	MF_00291_B	30S ribosomal protein S2 [rpsB].			PF00318	Ribosomal protein S2					SSF52313	SSF52313	PS00962	Ribosomal protein S2 signature 1.	----------MAVVSLSEMMEAGAHFGHQTRRWNPKMSKYIYCARNGVHIIDLVKTALCMNNAYKWTRNAAKSGKRFLFVGTKKQASDVVAQEAVRCGAAYVNQRWLGGMLTNWSTMKARIERLKDLERMESSGAIAMRPKKEAAVLRRELERLQKYLGGLKGMRRLPDVVVLVDQRRESNAVLEARKLDISLVSMLDTNCDPDLCEVPIPCNDDAVRSVQLILGRLADAINEGRKGSNDQRKV-----
	10018	GC_00000143	HL+LL Core	NATL1A	47524	ECG	167555.NATL1_07891	30S ribosomal protein S2	G3DSA:3.40.50.10490	G3DSA:3.40.50.10490	PR00395	Ribosomal protein S2 signature	TIGR01011	rpsB_bact: ribosomal protein uS2			J	J			COG0052	Ribosomal protein S2	MF_00291_B	30S ribosomal protein S2 [rpsB].			PF00318	Ribosomal protein S2					SSF52313	SSF52313	PS00962	Ribosomal protein S2 signature 1.	MEANPEPTKNMAVVSLSEMMEAGAHFGHQTRRWNPKMSRYIYSARNGVHIIDLVKTAVCMNSAYKWTRGAARSGKRFLFVGTKKQASEVVAQEAIRCGASYVNQRWLGGMLTNWTTMKARIDRLKDLERMESSGAIAMRPKKEGAVLRRELERLQKYLGGLKGMRRLPDVVVLVDQRRETNAVLEARKLDIPLVSMLDTNCDPDLCEIPIPCNDDAVRSVQLVLGRLADAINEGRHGPNE---------
	9993	GC_00000143	HL+LL Core	NATL2A	49540	ECG	167555.NATL1_07891	30S ribosomal protein S2	G3DSA:3.40.50.10490	G3DSA:3.40.50.10490	PR00395	Ribosomal protein S2 signature	TIGR01011	rpsB_bact: ribosomal protein uS2			J	J			COG0052	Ribosomal protein S2	MF_00291_B	30S ribosomal protein S2 [rpsB].			PF00318	Ribosomal protein S2					SSF52313	SSF52313	PS00962	Ribosomal protein S2 signature 1.	MEANPEPTKNMAVVSLSEMMEAGAHFGHQTRRWNPKMSRYIYSARNGVHIIDLVKTAVCMNSAYKWTRGAARSGKRFLFVGTKKQASEVVAQEAIRCGASYVNQRWLGGMLTNWTTMKARIDRLKDLERMESSGAIAMRPKKEGAVLRRELERLQKYLGGLKGMRRLPDVVVLVDQRRETNAVLEARKLDIPLVSMLDTNCDPDLCEIPIPCNDDAVRSVQLVLGRLADAINEGRHGPNE---------
	9992	GC_00000143	HL+LL Core	PAC1	52537	ECG	167555.NATL1_07891	30S ribosomal protein S2	G3DSA:3.40.50.10490	G3DSA:3.40.50.10490	PR00395	Ribosomal protein S2 signature	TIGR01011	rpsB_bact: ribosomal protein uS2			J	J			COG0052	Ribosomal protein S2	MF_00291_B	30S ribosomal protein S2 [rpsB].			PF00318	Ribosomal protein S2					SSF52313	SSF52313	PS00962	Ribosomal protein S2 signature 1.	----------MAVVSLSEMMEAGAHFGHQTRRWNPKMSRYIYSARNGVHIIDLVKTAVCMNSAYKWTRGAARSGKRFLFVGTKKQASEVVAQEAIRCGASYVNQRWLGGMLTNWTTMKARIDRLKDLERMESSGAIAMRPKKEGAVLRRELERLQKYLGGLKGMRRLPDVVVLVDQRRETNAVLEARKLDIPLVSMLDTNCDPDLCEIPIPCNDDAVRSVQLVLGRLADAINEGRHGPNE---------
	10007	GC_00000143	HL+LL Core	SB	52960	ECG	146891.A9601_08141	30S ribosomal protein S2	G3DSA:3.40.50.10490	G3DSA:3.40.50.10490	PR00395	Ribosomal protein S2 signature	TIGR01011	rpsB_bact: ribosomal protein uS2			J	J			COG0052	Ribosomal protein S2	MF_00291_B	30S ribosomal protein S2 [rpsB].			PF00318	Ribosomal protein S2					SSF52313	SSF52313	PS00962	Ribosomal protein S2 signature 1.	----------MAVVSLSEMMEAGAHFGHQTRRWNPKMSKYIYCARNGVHIIDLVKTALCMNNAYKWTRNAAKSGKRFLFVGTKKQASDVVAQEATRCGAAYVNQRWLGGMLTNWTTMKARIERLKDLERMESSGSIAMRPKKEAAVLRRELERLQKYLGGLKGMRRLPDVVVLVDQRRESNAVLEARKLDISLVSMLDTNCDPDLCEVPIPCNDDAVRSVQLILGRLADAINEGRKGSNAERKN-----
	9990	GC_00000143	HL+LL Core	SS2	55858	NA	167539.Pro0825	30S ribosomal protein S2	G3DSA:3.40.50.10490	G3DSA:3.40.50.10490	PR00395	Ribosomal protein S2 signature	TIGR01011	rpsB_bact: ribosomal protein uS2			J	J			COG0052	Ribosomal protein S2	MF_00291_B	30S ribosomal protein S2 [rpsB].			PF00318	Ribosomal protein S2					SSF52313	SSF52313	PS00962	Ribosomal protein S2 signature 1.	----------MAVVTLSEMMEAGAHFGHQTRRWNPKMSRYIYCARNGVHIIDLVKTAVCMNNAYKWTRNAAKSGKRFLFVGTKKQASEVVAQEAARCGASYVNQRWLGGMLTNWTTMKARIDRLKDLERMESSGAIAMRPKKEASVLRHELERLQKYLGGLKGMKRLPDVVVLVDQRRETNAVLEARKLDIPLVSMLDTNCDPDLCEVPIPCNDDAVRSVQLVLGRIADAINEGRHGSNDQRARQKYS-
	10017	GC_00000143	HL+LL Core	SS35	57730	NA	167539.Pro0825	30S ribosomal protein S2	G3DSA:3.40.50.10490	G3DSA:3.40.50.10490	PR00395	Ribosomal protein S2 signature	TIGR01011	rpsB_bact: ribosomal protein uS2			J	J			COG0052	Ribosomal protein S2	MF_00291_B	30S ribosomal protein S2 [rpsB].			PF00318	Ribosomal protein S2					SSF52313	SSF52313	PS00962	Ribosomal protein S2 signature 1.	----------MAVVTLSEMMEAGAHFGHQTRRWNPKMSRYIYCARNGVHIIDLVKTAVCMNNAYKWTRNAAKSGKRFLFVGTKKQASEVVAQEAARCGASYVNQRWLGGMLTNWTTMKARIDRLKDLERMESSGAIAMRPKKEASVLRHELERLQKYLGGLKGMKRLPDVVVLVDQRRETNAVLEARKLDIPLVSMLDTNCDPDLCEVPIPCNDDAVRSVQLVLGRIADAINEGRHGSNDQRARQKYS-
	10009	GC_00000143	HL+LL Core	SS51	59475	NA	167539.Pro0825	30S ribosomal protein S2	G3DSA:3.40.50.10490	G3DSA:3.40.50.10490	PR00395	Ribosomal protein S2 signature	TIGR01011	rpsB_bact: ribosomal protein uS2			J	J			COG0052	Ribosomal protein S2	MF_00291_B	30S ribosomal protein S2 [rpsB].			PF00318	Ribosomal protein S2					SSF52313	SSF52313	PS00962	Ribosomal protein S2 signature 1.	----------MAVVTLSEMMEAGAHFGHQTRRWNPKMSRYIYCARNGVHIIDLVKTAVCMNNAYKWTRNAAKSGKRFLFVGTKKQASEVVAQEAARCGASYVNQRWLGGMLTNWTTMKARIDRLKDLERMESSGAIAMRPKKEASVLRHELERLQKYLGGLKGMKRLPDVVVLVDQRRETNAVLEARKLDIPLVSMLDTNCDPDLCEVPIPCNDDAVRSVQLVLGRIADAINEGRHGSNDQRARQKYS-
	9456	GC_00002373		MIT9211	20807	NA	167555.NATL1_19351	30S ribosomal protein S21			PR00976	Ribosomal protein S21 family signature	TIGR00030	S21p: ribosomal protein bS21			J	J			COG0828	Ribosomal protein S21	MF_00358	30S ribosomal protein S21 [rpsU].			PF01165	Ribosomal protein S21			PD005521	RIBOSOMAL S21 RIBONUCLEOPROTEIN 30S S21P A SSU SUBUNIT SEQUENCING DIRECT			PS01181	Ribosomal protein S21 signature.	----------MSQITVGENEGIESAIRRFKRQVSKAGIFLEIKRLRHHETPFEKYKRKQIQRKRSR---
	9452	GC_00002373		MIT9303	29200	ECG	167555.NATL1_19351	30S ribosomal protein S21			PR00976	Ribosomal protein S21 family signature	TIGR00030	S21p: ribosomal protein bS21			J	J			COG0828	Ribosomal protein S21	MF_00358	30S ribosomal protein S21 [rpsU].			PF01165	Ribosomal protein S21			PD005521	RIBOSOMAL S21 RIBONUCLEOPROTEIN 30S S21P A SSU SUBUNIT SEQUENCING DIRECT			PS01181	Ribosomal protein S21 signature.	----------MAQVTVGENEGVESALRRFKRAVSKAGIFSDLKRIRHHETPVEKYKRKAQQRRRSRRR-
	9457	GC_00002373		MIT9311	32362	ECG	146891.A9601_10681	30S ribosomal protein S21			PR00976	Ribosomal protein S21 family signature	TIGR00030	S21p: ribosomal protein bS21	Coil	Coil	J	J			COG0828	Ribosomal protein S21	MF_00358	30S ribosomal protein S21 [rpsU].			PF01165	Ribosomal protein S21			PD005521	RIBOSOMAL S21 RIBONUCLEOPROTEIN 30S S21P A SSU SUBUNIT SEQUENCING DIRECT			PS01181	Ribosomal protein S21 signature.	MLEYNFIKEILTQVTVGENEGIESALRRFKRQVSKSGIFADLKRLRHHETPIEKYKRKLQQRRKARRR-
	9454	GC_00002373		MIT9312	33891	ECG	146891.A9601_10681	30S ribosomal protein S21			PR00976	Ribosomal protein S21 family signature	TIGR00030	S21p: ribosomal protein bS21	Coil	Coil	J	J			COG0828	Ribosomal protein S21	MF_00358	30S ribosomal protein S21 [rpsU].			PF01165	Ribosomal protein S21			PD005521	RIBOSOMAL S21 RIBONUCLEOPROTEIN 30S S21P A SSU SUBUNIT SEQUENCING DIRECT			PS01181	Ribosomal protein S21 signature.	MLEYNFIKEILTQVTVGENEGIESALRRFKRQVSKSGIFADLKRLRHHETPIEKYKRKLQQRRKARRR-
	9453	GC_00002373		MIT9313	35937	ECG	167555.NATL1_19351	30S ribosomal protein S21			PR00976	Ribosomal protein S21 family signature	TIGR00030	S21p: ribosomal protein bS21			J	J			COG0828	Ribosomal protein S21	MF_00358	30S ribosomal protein S21 [rpsU].			PF01165	Ribosomal protein S21			PD005521	RIBOSOMAL S21 RIBONUCLEOPROTEIN 30S S21P A SSU SUBUNIT SEQUENCING DIRECT			PS01181	Ribosomal protein S21 signature.	----------MAQVTVGENEGVESALRRFKRAVSKAGIFSDLKRIRHHETPVEKYKRKAQQRRRSRRR-
	9455	GC_00002373		SS51	58719	NA	167539.Pro0590	30S ribosomal protein S21			PR00976	Ribosomal protein S21 family signature	TIGR00030	S21p: ribosomal protein bS21			J	J			COG0828	Ribosomal protein S21	MF_00358	30S ribosomal protein S21 [rpsU].			PF01165	Ribosomal protein S21			PD005521	RIBOSOMAL S21 RIBONUCLEOPROTEIN 30S S21P A SSU SUBUNIT SEQUENCING DIRECT			PS01181	Ribosomal protein S21 signature.	#NAME?
	13887	GC_00000199	HL+LL Core	AS9601	1684	ECG	146891.A9601_17391	30S ribosomal protein S9	G3DSA:3.30.230.10	G3DSA:3.30.230.10							J	J			COG0103	Ribosomal protein S9	MF_00532_B	30S ribosomal protein S9 [rpsI].			PF00380	Ribosomal protein S9/S16					SSF54211	SSF54211	PS00360	Ribosomal protein S9 signature.	MNSQI-KNKAVYWGTGRRKTSVARVRLIPGNGLIKINGRSGDDYLNFNPLHLNSIKAPLQTLGLENSYDILVNVFGGGLTGQADAIKQGAARALCELSPDNRKPLKTEGHLSRDPRAKERRKYGLKKARKAPQFSKR
	13907	GC_00000199	HL+LL Core	CCMP1375	3499	NA	167539.Pro1685	30S ribosomal protein S9	G3DSA:3.30.230.10	G3DSA:3.30.230.10							J	J			COG0103	Ribosomal protein S9	MF_00532_B	30S ribosomal protein S9 [rpsI].			PF00380	Ribosomal protein S9/S16					SSF54211	SSF54211	PS00360	Ribosomal protein S9 signature.	MNSSS-KNAVVYWGTGRRKTSVARVRLIPGTGKITINGRPGDHYLNFNPAYLSAVKAPLHTLGLGEAYDVLVNVYGGGLTGQSDAIKQGAARALCELSVDNRKPLKTEGHLSRDPRAKERRKYGLKKARKAPQFSKR
	13901	GC_00000199	HL+LL Core	EQPAC1	4728	ECG	59919.PMM1531	30S ribosomal protein S9	G3DSA:3.30.230.10	G3DSA:3.30.230.10							J	J			COG0103	Ribosomal protein S9	MF_00532_B	30S ribosomal protein S9 [rpsI].			PF00380	Ribosomal protein S9/S16					SSF54211	SSF54211	PS00360	Ribosomal protein S9 signature.	MNSQV-KNKAVYWGTGRRKTSVARVRLIPGNGQIKINGRSGDDYLNFNPSHLNSVKAPLLTLGLENSYDIFVNVFGGGLTGQADAIKQGAARALCGLSPDNRKPLKTEGHLSRDPRSKERKKYGLKKARKAGQFSKR
	13888	GC_00000199	HL+LL Core	GP2	7193	EAG	146891.A9601_17391	30S ribosomal protein S9	G3DSA:3.30.230.10	G3DSA:3.30.230.10							J	J			COG0103	Ribosomal protein S9	MF_00532_B	30S ribosomal protein S9 [rpsI].			PF00380	Ribosomal protein S9/S16					SSF54211	SSF54211	PS00360	Ribosomal protein S9 signature.	MNSQI-KSKAVYWGTGRRKTSVARVRLIPGNGMIKINGRSGDDYLNFNPLHLNSVKAPLQTLGLENSYDILVNVYGGGLTGQADAIKQGAARALCELSPDNRKPLKNEGHLSRDPRAKERRKYGLKKARKAPQFSKR
	13895	GC_00000199	HL+LL Core	LG	9001	NA	167539.Pro1685	30S ribosomal protein S9	G3DSA:3.30.230.10	G3DSA:3.30.230.10							J	J			COG0103	Ribosomal protein S9	MF_00532_B	30S ribosomal protein S9 [rpsI].			PF00380	Ribosomal protein S9/S16					SSF54211	SSF54211	PS00360	Ribosomal protein S9 signature.	MNSSS-KNAVVYWGTGRRKTSVARVRLIPGTGKITINGRPGDHYLNFNPAYLSAVKAPLHTLGLGEAYDVLVNVYGGGLTGQSDAIKQGAARALCELSVDNRKPLKTEGHLSRDPRAKERRKYGLKKARKAPQFSKR
	13893	GC_00000199	HL+LL Core	MED4	10958	ECG	59919.PMM1531	30S ribosomal protein S9	G3DSA:3.30.230.10	G3DSA:3.30.230.10							J	J			COG0103	Ribosomal protein S9	MF_00532_B	30S ribosomal protein S9 [rpsI].			PF00380	Ribosomal protein S9/S16					SSF54211	SSF54211	PS00360	Ribosomal protein S9 signature.	MNSQV-KNKAVYWGTGRRKTSVARVRLIPGNGQIKINGRSGDDYLNFNPSHLNSVKAPLLTLGLENSYDIFVNVFGGGLTGQADAIKQGAARALCGLSPDNRKPLKTEGHLSRDPRSKERKKYGLKKARKAGQFSKR
	13886	GC_00000199	HL+LL Core	MIT9107	11642	ECG	74546.PMT9312_1624	30S ribosomal protein S9	G3DSA:3.30.230.10	G3DSA:3.30.230.10							J	J			COG0103	Ribosomal protein S9	MF_00532_B	30S ribosomal protein S9 [rpsI].			PF00380	Ribosomal protein S9/S16					SSF54211	SSF54211	PS00360	Ribosomal protein S9 signature.	MNSQI-KNKAVYWGTGRRKTSVARVRLIPGTGQIKINGRAGDDYLNFNPLHLNSVKAPLQTLGLENSYDIFVNVFGGGLTGQADAIKQGAARALCELSPDNRKPLKTEGHLSRDPRAKERRKYGLKKARKAPQFSKR
	13885	GC_00000199	HL+LL Core	MIT9116	13971	ECG	74546.PMT9312_1624	30S ribosomal protein S9	G3DSA:3.30.230.10	G3DSA:3.30.230.10							J	J			COG0103	Ribosomal protein S9	MF_00532_B	30S ribosomal protein S9 [rpsI].			PF00380	Ribosomal protein S9/S16					SSF54211	SSF54211	PS00360	Ribosomal protein S9 signature.	MNSQI-KNKAVYWGTGRRKTSVARVRLIPGTGQIKINGRAGDDYLNFNPLHLNSVKAPLQTLGLENSYDIFVNVFGGGLTGQADAIKQGAARALCELSPDNRKPLKTEGHLSRDPRAKERRKYGLKKARKAPQFSKR
	13889	GC_00000199	HL+LL Core	MIT9123	16029	ECG	74546.PMT9312_1624	30S ribosomal protein S9	G3DSA:3.30.230.10	G3DSA:3.30.230.10							J	J			COG0103	Ribosomal protein S9	MF_00532_B	30S ribosomal protein S9 [rpsI].			PF00380	Ribosomal protein S9/S16					SSF54211	SSF54211	PS00360	Ribosomal protein S9 signature.	MNSQI-KNKAVYWGTGRRKTSVARVRLIPGTGQIKINGRAGDDYLNFNPLHLNSVKAPLQTLGLENSYDIFVNVFGGGLTGQADAIKQGAARALCELSPDNRKPLKTEGHLSRDPRAKERRKYGLKKARKAPQFSKR
	13891	GC_00000199	HL+LL Core	MIT9201	17696	ECG	74546.PMT9312_1624	30S ribosomal protein S9	G3DSA:3.30.230.10	G3DSA:3.30.230.10							J	J			COG0103	Ribosomal protein S9	MF_00532_B	30S ribosomal protein S9 [rpsI].			PF00380	Ribosomal protein S9/S16					SSF54211	SSF54211	PS00360	Ribosomal protein S9 signature.	MNSQI-KNKAVYWGTGRRKTSVARVRLIPGNGQIKINGRSGDDYLNFNPLHLNSIKAPLQTLGLENSYDILVNVFGGGLTGQADAIKQGAARALCELSPDNRKPLKTEGHLSRDPRAKERRKYGLKKARKAPQFSKR
	13898	GC_00000199	HL+LL Core	MIT9202	19437	ECG	93060.P9215_18031	30S ribosomal protein S9	G3DSA:3.30.230.10	G3DSA:3.30.230.10							J	J			COG0103	Ribosomal protein S9	MF_00532_B	30S ribosomal protein S9 [rpsI].			PF00380	Ribosomal protein S9/S16					SSF54211	SSF54211	PS00360	Ribosomal protein S9 signature.	MNSQI-KTKAVYWGTGRRKTSVARVRLIPGNGLIKINGRSGDDYLNFNPLHLNSVKAPLQTLGLENSYDILVNVFGGGLTGQADAIKQGAARALCELSPDNRKPLKTEGHLSRDPRAKERRKYGLKKARKAPQFSKR
	13903	GC_00000199	HL+LL Core	MIT9211	22281	NA	93059.P9211_16511	30S ribosomal protein S9	G3DSA:3.30.230.10	G3DSA:3.30.230.10							J	J			COG0103	Ribosomal protein S9	MF_00532_B	30S ribosomal protein S9 [rpsI].			PF00380	Ribosomal protein S9/S16					SSF54211	SSF54211	PS00360	Ribosomal protein S9 signature.	MNSSSQRNTVVYWGTGRRKTSVARVRLIPGTGKITINGRPGDHYLNFNPAYLAAVKAPLQTLGLSDSYDVLVNVYGGGLTGQADAIKQGAARALCELSADNRKPLKIEGHLSRDPRAKERRKYGLKKARKAPQFSKR
	13900	GC_00000199	HL+LL Core	MIT9215	24242	ECG	93060.P9215_18031	30S ribosomal protein S9	G3DSA:3.30.230.10	G3DSA:3.30.230.10							J	J			COG0103	Ribosomal protein S9	MF_00532_B	30S ribosomal protein S9 [rpsI].			PF00380	Ribosomal protein S9/S16					SSF54211	SSF54211	PS00360	Ribosomal protein S9 signature.	MNSQI-KTKAVYWGTGRRKTSVARVRLIPGNGLITINGRSGDDYLNFNPLHLNSVKAPLQTLGLENSYDILVNVFGGGLTGQADAIKQGAARALCELSPDNRKPLKTEGHLSRDPRAKERRKYGLKKARKAPQFSKR
	13899	GC_00000199	HL+LL Core	MIT9301	26090	ECG	167546.P9301_17231	30S ribosomal protein S9	G3DSA:3.30.230.10	G3DSA:3.30.230.10							J	J			COG0103	Ribosomal protein S9	MF_00532_B	30S ribosomal protein S9 [rpsI].			PF00380	Ribosomal protein S9/S16					SSF54211	SSF54211	PS00360	Ribosomal protein S9 signature.	MNSQI-KNKAVYWGTGRRKTSVARVRLIPGNGLIKINGRAGDDYLNFNPLHLNSIKAPLQTLGLENSYDMYVNVFGGGLTGQADAIKQGAARALCELSPDNRKPLKTEGHLSRDPRAKERRKYGLKKARKAPQFSKR
	13897	GC_00000199	HL+LL Core	MIT9302	26849	ECG	74546.PMT9312_1624	30S ribosomal protein S9	G3DSA:3.30.230.10	G3DSA:3.30.230.10							J	J			COG0103	Ribosomal protein S9	MF_00532_B	30S ribosomal protein S9 [rpsI].			PF00380	Ribosomal protein S9/S16					SSF54211	SSF54211	PS00360	Ribosomal protein S9 signature.	MNSQI-KNKAVYWGTGRRKTSVARVRLIPGNGQIKINGRSGDDYLNFNPLHLNSVKAPLQTLGLENSYDILVNVFGGGLTGQADAIKQGAARALCELSPDNRKPLKTEGHLSRDPRAKERRKYGLKKARKAPQFSKR
	13878	GC_00000199	HL+LL Core	MIT9303	30331	ECG	74547.PMT1759	30S ribosomal protein S9	G3DSA:3.30.230.10	G3DSA:3.30.230.10							J	J			COG0103	Ribosomal protein S9	MF_00532_B	30S ribosomal protein S9 [rpsI].			PF00380	Ribosomal protein S9/S16					SSF54211	SSF54211	PS00360	Ribosomal protein S9 signature.	MSSSN--NSVVYWGTGRRKTSVARVRLVPGTGTITINGRPGDHYLNFNPAYLAAVKAPLQTLGLNEQYDVLVNVHGGGLTGQADAIKQGAARALCELSADNRKPLKTEGHLSRDPRAKERRKYGLKKARKAPQFSKR
	13906	GC_00000199	HL+LL Core	MIT9311	31074	ECG	74546.PMT9312_1624	30S ribosomal protein S9	G3DSA:3.30.230.10	G3DSA:3.30.230.10							J	J			COG0103	Ribosomal protein S9	MF_00532_B	30S ribosomal protein S9 [rpsI].			PF00380	Ribosomal protein S9/S16					SSF54211	SSF54211	PS00360	Ribosomal protein S9 signature.	MNSQI-KNKAVYWGTGRRKTSVARVRLIPGNGQIKINGRSGDDYLNFNPLHLNSIKAPLQTLGLENSYDILVNVFGGGLTGQADAIKQGAARALCELSPDNRKPLKTEGHLSRDPRAKERRKYGLKKARKAPQFSKR
	13892	GC_00000199	HL+LL Core	MIT9312	34581	ECG	74546.PMT9312_1624	30S ribosomal protein S9	G3DSA:3.30.230.10	G3DSA:3.30.230.10							J	J			COG0103	Ribosomal protein S9	MF_00532_B	30S ribosomal protein S9 [rpsI].			PF00380	Ribosomal protein S9/S16					SSF54211	SSF54211	PS00360	Ribosomal protein S9 signature.	MNSQI-KNKAVYWGTGRRKTSVARVRLIPGNGQIKINGRSGDDYLNFNPLHLNSIKAPLQTLGLENSYDILVNVFGGGLTGQADAIKQGAARALCELSPDNRKPLKTEGHLSRDPRAKERRKYGLKKARKAPQFSKR
	13884	GC_00000199	HL+LL Core	MIT9313	36761	ECG	74547.PMT1759	30S ribosomal protein S9	G3DSA:3.30.230.10	G3DSA:3.30.230.10							J	J			COG0103	Ribosomal protein S9	MF_00532_B	30S ribosomal protein S9 [rpsI].			PF00380	Ribosomal protein S9/S16					SSF54211	SSF54211	PS00360	Ribosomal protein S9 signature.	MSSSN--NSVVYWGTGRRKTSVARVRLVPGSGTITINGRPGDHYLNFNPAYLAAVKAPLQTLGLNEQYDVLVNVHGGGLTGQADAIKQGAARALCELSADNRKPLKTEGHLSRDPRAKERRKYGLKKARKAPQFSKR
	13883	GC_00000199	HL+LL Core	MIT9314	38585	ECG	146891.A9601_17391	30S ribosomal protein S9	G3DSA:3.30.230.10	G3DSA:3.30.230.10							J	J			COG0103	Ribosomal protein S9	MF_00532_B	30S ribosomal protein S9 [rpsI].			PF00380	Ribosomal protein S9/S16					SSF54211	SSF54211	PS00360	Ribosomal protein S9 signature.	MNSQI-KNKAVYWGTGRRKTSVARVRLIPGNGLIKINGRSGDDYLNFNPLHLNSIKAPLQTLGLENSYDILVNVFGGGLTGQADAIKQGAARALCELSPDNRKPLKTEGHLSRDPRAKERRKYGLKKARKAPQFSKR
	13890	GC_00000199	HL+LL Core	MIT9321	40472	ECG	74546.PMT9312_1624	30S ribosomal protein S9	G3DSA:3.30.230.10	G3DSA:3.30.230.10							J	J			COG0103	Ribosomal protein S9	MF_00532_B	30S ribosomal protein S9 [rpsI].			PF00380	Ribosomal protein S9/S16					SSF54211	SSF54211	PS00360	Ribosomal protein S9 signature.	MNSQI-KNKAVYWGTGRRKTSVARVRLIPGDGQITINGRSGDDYLNFNPLHLNSVKAPLQTLGLENSYDVLVNVFGGGLTGQAEAIKQGAARALCELSADNRKPLKTEGHLSRDPRAKERRKYGLKKARKAPQFSKR
	13881	GC_00000199	HL+LL Core	MIT9322	41415	ECG	74546.PMT9312_1624	30S ribosomal protein S9	G3DSA:3.30.230.10	G3DSA:3.30.230.10							J	J			COG0103	Ribosomal protein S9	MF_00532_B	30S ribosomal protein S9 [rpsI].			PF00380	Ribosomal protein S9/S16					SSF54211	SSF54211	PS00360	Ribosomal protein S9 signature.	MNSQI-KNKAVYWGTGRRKTSVARVRLIPGDGQITINGRSGDDYLNFNPLHLNSVKAPLQTLGLENSYDVLVNVFGGGLTGQAEAIKQGAARALCELSADNRKPLKTEGHLSRDPRAKERRKYGLKKARKAPQFSKR
	13902	GC_00000199	HL+LL Core	MIT9401	43386	ECG	74546.PMT9312_1624	30S ribosomal protein S9	G3DSA:3.30.230.10	G3DSA:3.30.230.10							J	J			COG0103	Ribosomal protein S9	MF_00532_B	30S ribosomal protein S9 [rpsI].			PF00380	Ribosomal protein S9/S16					SSF54211	SSF54211	PS00360	Ribosomal protein S9 signature.	MNSQI-KNKAVYWGTGRRKTSVARVRLIPGDGQITINGRSGDDYLNFNPLHLNSVKAPLQTLGLENSYDVLVNVFGGGLTGQAEAIKQGAARALCELSADNRKPLKTEGHLSRDPRAKERRKYGLKKARKAPQFSKR
	13882	GC_00000199	HL+LL Core	MIT9515	46581	ECG	167542.P9515_17131	30S ribosomal protein S9	G3DSA:3.30.230.10	G3DSA:3.30.230.10							J	J			COG0103	Ribosomal protein S9	MF_00532_B	30S ribosomal protein S9 [rpsI].			PF00380	Ribosomal protein S9/S16					SSF54211	SSF54211	PS00360	Ribosomal protein S9 signature.	MNSQI-KNKAVYWGTGRRKTSVARVRLIPGNGQIKINGRSGDDYLNFNPSHLNSVKAPLQTLGLENSYDIFVNVFGGGLTGQADAIKQGAARALCDLSPDNRKPLKTEGHLSRDPRAKERRKYGLKKARKAPQFSKR
	13905	GC_00000199	HL+LL Core	NATL1A	48588	ECG	167555.NATL1_19771	30S ribosomal protein S9	G3DSA:3.30.230.10	G3DSA:3.30.230.10							J	J			COG0103	Ribosomal protein S9	MF_00532_B	30S ribosomal protein S9 [rpsI].			PF00380	Ribosomal protein S9/S16					SSF54211	SSF54211	PS00360	Ribosomal protein S9 signature.	MTSST--SKVVYWGTGRRKTSVARVRLTPGKGEIIINGRPGDHYLNFNPAYISAVKAPLKTLGLSESYDVLVNVYGGGLTGQSDAIKQGAARALCTLSLDNRKSLKLEGHLSRDPRAKERRKYGLKKARKAPQFSKR
	13880	GC_00000199	HL+LL Core	NATL2A	50569	ECG	167555.NATL1_19771	30S ribosomal protein S9	G3DSA:3.30.230.10	G3DSA:3.30.230.10							J	J			COG0103	Ribosomal protein S9	MF_00532_B	30S ribosomal protein S9 [rpsI].			PF00380	Ribosomal protein S9/S16					SSF54211	SSF54211	PS00360	Ribosomal protein S9 signature.	MTSST--NKVVYWGTGRRKTSVARVRLTPGKGEIIINGRPGDHYLNFNPAYISAVKAPLKTLGLSESYDVLVNVYGGGLTGQSDAIKQGAARALCTLSLDNRKPLKLEGHLSRDPRAKERRKYGLKKARKAPQFSKR
	13879	GC_00000199	HL+LL Core	PAC1	51092	ECG	167555.NATL1_19771	30S ribosomal protein S9	G3DSA:3.30.230.10	G3DSA:3.30.230.10							J	J			COG0103	Ribosomal protein S9	MF_00532_B	30S ribosomal protein S9 [rpsI].			PF00380	Ribosomal protein S9/S16					SSF54211	SSF54211	PS00360	Ribosomal protein S9 signature.	MTSST--NKVVYWGTGRRKTSVARVRLTPGKGEIIINGRPGDHYLNFNPAYISAVKAPLKTLGLSESYDVLVNVYGGGLTGQSDAIKQGAARALCTLSIDNRKPLKLEGHLSRDPRAKERRKYGLKKARKAPQFSKR
	13894	GC_00000199	HL+LL Core	SB	54236	ECG	146891.A9601_17391	30S ribosomal protein S9	G3DSA:3.30.230.10	G3DSA:3.30.230.10							J	J			COG0103	Ribosomal protein S9	MF_00532_B	30S ribosomal protein S9 [rpsI].			PF00380	Ribosomal protein S9/S16					SSF54211	SSF54211	PS00360	Ribosomal protein S9 signature.	MNSQI-KNKAVYWGTGRRKTSVARVRLIPGNGLIKINGRAGDDYLNFNPLHLNSIKAPLQTLGLENSYDILVNVFGGGLTGQADAIKQGAARALCELSPENRKPLKTEGHLSRDPRAKERRKYGLKKARKAPQFSKR
	13877	GC_00000199	HL+LL Core	SS2	55725	NA	167539.Pro1685	30S ribosomal protein S9	G3DSA:3.30.230.10	G3DSA:3.30.230.10							J	J			COG0103	Ribosomal protein S9	MF_00532_B	30S ribosomal protein S9 [rpsI].			PF00380	Ribosomal protein S9/S16					SSF54211	SSF54211	PS00360	Ribosomal protein S9 signature.	MNSSS-KNAVVYWGTGRRKTSVARVRLIPGTGKITINGRPGDHYLNFNPAYLSAVKAPLHTLGLGEAYDVLVNVYGGGLTGQSDAIKQGAARALCELSVDNRKPLKTEGHLSRDPRAKERRKYGLKKARKAPQFSKR
	13904	GC_00000199	HL+LL Core	SS35	57110	NA	167539.Pro1685	30S ribosomal protein S9	G3DSA:3.30.230.10	G3DSA:3.30.230.10							J	J			COG0103	Ribosomal protein S9	MF_00532_B	30S ribosomal protein S9 [rpsI].			PF00380	Ribosomal protein S9/S16					SSF54211	SSF54211	PS00360	Ribosomal protein S9 signature.	MNSSS-KNAVVYWGTGRRKTSVARVRLIPGTGKITINGRPGDHYLNFNPAYLSAVKAPLHTLGLGEAYDVLVNVYGGGLTGQSDAIKQGAARALCELSVDNRKPLKTEGHLSRDPRAKERRKYGLKKARKAPQFSKR
	13896	GC_00000199	HL+LL Core	SS51	60032	NA	167539.Pro1685	30S ribosomal protein S9	G3DSA:3.30.230.10	G3DSA:3.30.230.10							J	J			COG0103	Ribosomal protein S9	MF_00532_B	30S ribosomal protein S9 [rpsI].			PF00380	Ribosomal protein S9/S16					SSF54211	SSF54211	PS00360	Ribosomal protein S9 signature.	MNSSS-KNAVVYWGTGRRKTSVARVRLIPGTGKITINGRPGDHYLNFNPAYLSAVKAPLHTLGLGEAYDVLVNVYGGGLTGQSDAIKQGAARALCELSVDNRKPLKTEGHLSRDPRAKERRKYGLKKARKAPQFSKR
	40501	GC_00000588	HL+LL Core	AS9601	1150	ECG	146891.A9601_11871	4-alpha-glucanotransferase (EC 2.4.1.25)	G3DSA:3.20.20.80	G3DSA:3.20.20.80			TIGR00217	malQ: 4-alpha-glucanotransferase			G	G			COG1640	4-alpha-glucanotransferase					PF02446	4-alpha-glucanotransferase					SSF51445	SSF51445			MPIESIIAKKSLGVLMHPTCIP-GGNVCGTFGRGAKEWIRKLHKHGIEYWQFLPLTPTDSTGSPYSSPSSFALNPWFLDIDDLIEKGFIYISNKENLGPTNQ---NKDHFDFDIADDLTKKLGLLLLQGWSSQSEKRKINFNKWVSRHSWVEDYATFVVIREEFNMLPWWEWPQDFKIKNNKFLKSWIKKKSEEILIKKLIQWHLDEQWSVIKNFAKSKNIKLIGDLPFYVSRDSADVWSNKSLFSIFKNGDLIFQSGVPPDYFSSTGQLWGTPTYFWSKHKRTNFNWWRKRFQRQFELVDILRFDHFRGLAGYWRVNGNSKTAIIGKWINSPGKTLLNKVKKDLGGNYLPIIAEDLGVITPDVEKLRKRFELPGMKILQFAFDGNKDNPYLPKNIEGE…
	40521	GC_00000588	HL+LL Core	CCMP1375	2943	NA	146891.A9601_11871	4-alpha-glucanotransferase (EC 2.4.1.25)	G3DSA:3.20.20.80	G3DSA:3.20.20.80			TIGR00217	malQ: 4-alpha-glucanotransferase			G	G			COG1640	4-alpha-glucanotransferase					PF02446	4-alpha-glucanotransferase					SSF51445	SSF51445			MGFNSSAHPRFSGVLLHPSSLP-SGGVCGTFGQPSRDWIKLLSENQIAVWQILPLAPPDSFGSPYSSPSGFAFNPWFLDANDLAKEGFINSDDINEFSETLP--SDSSKIDFTLATRRSNEIGKALIKNWKNQDSGKQIEFLDWSSNQHWLDDHVCFMELRRQFSYLPWWEWPSAFSSRNQNELGLWKIKHKDDLLEHALVQWHLNRQWNLLRKIAKKFNVAIFGDLPFYVSRDSADVWGNRSLFSIFSKGDLHSQSGVPPDYFSETGQLWGTPVYRWQKHKRTRFRWWRNRIRRQWLQVDLLRLDHFRALNSYWSVPGGQKTAQHGCWLPSPGLELLTILQQDYGKS-LPLVAEDLGVITKQVNSLREHFGFPGMKILQFAFNGDPSNPYLPENFIGH…
	40515	GC_00000588	HL+LL Core	EQPAC1	3731	ECG	146891.A9601_11871	4-alpha-glucanotransferase (EC 2.4.1.25)	G3DSA:3.20.20.80	G3DSA:3.20.20.80			TIGR00217	malQ: 4-alpha-glucanotransferase			G	G			COG1640	4-alpha-glucanotransferase					PF02446	4-alpha-glucanotransferase					SSF51445	SSF51445			MSLKSVLKNKSLGILVHPSSLP-GGSYCGTFGEGAKDWIKKLCKYKINHWQFLPLTPTDSTGSPYSSPSSFALNPWFLDINKLIEENFIISLNKKDLQSINQ---NEDHFDFDYANNLSKKLGEYLLFDWESQSEMRKTDFYLWNKKNTWVEDYSIFMVLREKFNMLPWWEWPLEFKQKENEFIKTWIKDKKNEILKTKLIQWHLDKQWKEIKVFAKTNGITLIGDLPFYVSRDSVDVWSNKSLFSISQNGDLLFQSGVPPDYFSSTGQLWGTPTYYWAKHKSTAFRWWRKRFKRQFELVDILRLDHFRALAGYWRVDGNAQNAINGSWINSPGKELLNLLKKDLKSDYLPIIAEDLGVITKDVEILRDNYELPGMKILQFAFDGNDNNPYLPKNIEKE…
	40502	GC_00000588	HL+LL Core	GP2	6631	EAG	146891.A9601_11871	4-alpha-glucanotransferase (EC 2.4.1.25)	G3DSA:3.20.20.80	G3DSA:3.20.20.80			TIGR00217	malQ: 4-alpha-glucanotransferase			G	G			COG1640	4-alpha-glucanotransferase					PF02446	4-alpha-glucanotransferase					SSF51445	SSF51445			MQIEKVLPKKSLGILMHPSCIP-GGTVCGTFGRGAKEWIKKLHKYGIEYWQFLPLTPTDSTGSPYSSPSSFALNPWFLDIDDLVEKGFIFISNKDELGPINQ---NKNHFDFDVADISTKKIGRHLLQSWNSQPEERKLDFYKWTNMNSWVEDYATFVVIREEFNMLPWWRWPQEFKVKNDKFLKSWIKKKSKEILIKKLIQWHLDKQWKSIKNFAKLNKVKLIGDLPFYVSRDSADVWSNKSLFSILKNGDLIFQSGVPPDYFSSTGQLWGTPTYYWSKHKRTNFDWWRKRFKRQFELVDLLRLDHFRGLAGYWRVNGNSDSAIHGKWINSPGRNLLNNLKKDLGAYYLPIIAEDLGVITPDVDKLRKNFELPGMKILQFAFDGNEDNPYLPKNIDGE…
	40509	GC_00000588	HL+LL Core	LG	7824	NA	146891.A9601_11871	4-alpha-glucanotransferase (EC 2.4.1.25)	G3DSA:3.20.20.80	G3DSA:3.20.20.80			TIGR00217	malQ: 4-alpha-glucanotransferase			G	G			COG1640	4-alpha-glucanotransferase					PF02446	4-alpha-glucanotransferase					SSF51445	SSF51445			MGFNSSAHPRFSGVLLHPSSLP-SGGVCGTFGQPSRDWIKLLSENQIAVWQILPLAPPDSFGSPYSSPSGFAFNPWFLDANDLAKEGFINSDDINEFSETLP--SDSSKIDFTLATRRSNEIGKALIKNWKNQDSGKQIEFLDWSSNQHWLDDHVCFMELRRQFSYLPWWEWPSAFSSRNQNELGLWKIKHKDDLLEHALVQWHLNRQWNLLRKIAKKFNVAIFGDLPFYVSRDSADVWGNRSLFSIFSKGDLHSQSGVPPDYFSETGQLWGTPVYRWQKHKRTRFRWWRNRIRRQWLQVDLLRLDHFRALNSYWSVPGGQKTAQHGCWLPSPGLELLTILQQDYGKS-LPLVAEDLGVITKQVNSLREHFGFPGMKILQFAFNGDPSNPYLPENFIGH…
	40507	GC_00000588	HL+LL Core	MED4	10448	ECG	146891.A9601_11871	4-alpha-glucanotransferase (EC 2.4.1.25)	G3DSA:3.20.20.80	G3DSA:3.20.20.80			TIGR00217	malQ: 4-alpha-glucanotransferase			G	G			COG1640	4-alpha-glucanotransferase					PF02446	4-alpha-glucanotransferase					SSF51445	SSF51445			MSLKSVLKNKSLGILVHPSSLP-GGSYCGTFGEGAKDWIKKLCKYKINHWQFLPLTPTDSTGSPYSSPSSFALNPWFLDINKLIEENFIISLNKKDLQSINQ---NEDHFDFDYANNLSKKLGEYLLFDWESQSEMRKTDFYLWNKKNTWVEDYSIFMVLREKFNMLPWWEWPLEFKQKENEFIKTWIKDKKNEILKTKLIQWHLDKQWKEIKVFAKTNGITLIGDLPFYVSRDSVDVWSNKSLFSISQNGDLLFQSGVPPDYFSSTGQLWGTPTYYWAKHKSTAFRWWRKRFKRQFELVDILRLDHFRALAGYWRVDGNAQNAINGSWINSPGKELLNLLKKDLKSDYLPIIAEDLGVITKDVEILRDNYELPGMKILQFAFDGNDNNPYLPKNIEKE…
	40500	GC_00000588	HL+LL Core	MIT9107	12085	ECG	146891.A9601_11871	4-alpha-glucanotransferase (EC 2.4.1.25)	G3DSA:3.20.20.80	G3DSA:3.20.20.80			TIGR00217	malQ: 4-alpha-glucanotransferase			G	G			COG1640	4-alpha-glucanotransferase					PF02446	4-alpha-glucanotransferase					SSF51445	SSF51445			MTIQTVLTKKSLGILMHPTCIP-GGRLCGTFGRGAKEWIKKLHKHGIEYWQFLPLTPTDSKGSPYSSPSSFALNPWFLDIDFLIERGFIFISNKEELGPTNN---NKNYFNFEEADDLKKKLGRLLLQGWSSQSQERKLDFHKWNSENSWVEDYATFIAIKEEFNMLPWWQWPQEFKMKNNKFLKSWINKKSEKILIEKLIQWHLDEQWRTIKNFAKIYGIKLIGDLPFYVSRDSADVWSNKSLFSIFKNGDLIFQSGVPPDYFSSTGQLWGSPTYFWSRHKRTNFDWWRKRFKRQFELVDLLRLDHFRGLAGYWRVNGYSKTAICGKWINSPGRTLLNKLKNDLGSDYLPIIAEDLGVITSDVEKLRKNFELPGMKILQFAFDGKEDNPYLPKNIKGE…
	40499	GC_00000588	HL+LL Core	MIT9116	14391	ECG	146891.A9601_11871	4-alpha-glucanotransferase (EC 2.4.1.25)	G3DSA:3.20.20.80	G3DSA:3.20.20.80			TIGR00217	malQ: 4-alpha-glucanotransferase			G	G			COG1640	4-alpha-glucanotransferase					PF02446	4-alpha-glucanotransferase					SSF51445	SSF51445			MTIQTVLTKKSLGILMHPTCIP-GGRLCGTFGRGAKEWIKKLHKHGIEYWQFLPLTPTDSKGSPYSSPSSFALNPWFLDIDFLIERGFIFISNKEELGPTNN---NKNYFNFEEADDLKKKLGRLLLQGWSSQSQERKLDFHKWNSENSWVEDYATFIAIKEEFNMLPWWQWPQEFKMKNNKFLKSWINKKSEKILIEKLIQWHLDEQWRTIKNFAKIYGIKLIGDLPFYVSRDSADVWSNKSLFSIFKNGDLIFQSGVPPDYFSSTGQLWGSPTYFWSRHKRTNFDWWRKRFKRQFELVDLLRLDHFRGLAGYWRVNGYSKTAICGKWINSPGRTLLNKLKNDLGSDYLPIIAEDLGVITSDVEKLRKNFELPGMKILQFAFDGKEDNPYLPKNIKGE…
	40503	GC_00000588	HL+LL Core	MIT9123	16199	ECG	146891.A9601_11871	4-alpha-glucanotransferase (EC 2.4.1.25)	G3DSA:3.20.20.80	G3DSA:3.20.20.80			TIGR00217	malQ: 4-alpha-glucanotransferase			G	G			COG1640	4-alpha-glucanotransferase					PF02446	4-alpha-glucanotransferase					SSF51445	SSF51445			MTIQTVLTKKSLGILMHPTCIP-GGRLCGTFGRGAKEWIKKLHKHGIEYWQFLPLTPTDSKGSPYSSPSSFALNPWFLDIDFLIERGFIFISNKEELGPTNN---NKNYFNFEEADDLKKKLGRLLLQGWSSQSQERKLDFHKWNSENSWVEDYATFIAIKEEFNMLPWWQWPQEFKMKNNKFLKSWINKKSEKILIEKLIQWHLDEQWRTIKNFAKIYGIKLIGDLPFYVSRDSADVWSNKSLFSIFKNGDLIFQSGVPPDYFSSTGQLWGSPTYFWSRHKRTNFDWWRKRFKRQFELVDLLRLDHFRGLAGYWRVNGYSKTAICGKWINSPGRTLLNKLKNDLGSDYLPIIAEDLGVITSDVEKLRKNFELPGMKILQFAFDGKEDNPYLPKNIKGE…
	40505	GC_00000588	HL+LL Core	MIT9201	18309	ECG	146891.A9601_11871	4-alpha-glucanotransferase (EC 2.4.1.25)	G3DSA:3.20.20.80	G3DSA:3.20.20.80			TIGR00217	malQ: 4-alpha-glucanotransferase			G	G			COG1640	4-alpha-glucanotransferase					PF02446	4-alpha-glucanotransferase					SSF51445	SSF51445			MPTNKVLPKKSLGILMHPTSIP-GGRVCGTFGKEAKEWIKMLHKYGIEYWQFLPLTPTDSTGSPYSSPSSFALNPWFLDMDDLIERSFIFISKKEELKQK-----NKSHFDFEVANDSSKKLGRLLLQGWSYQSDDRKLDFHKWVSKNSWVEDYATFIVIREEFNMLPWWQWPQEFKIKNDNFLNSWIKLKSEAILIQKLIQWHLDKQWRSIKNFAKSRDIKLIGDLPFYVSRDSADVWSNKSLFSIFKNGDLIFQSGVPPDYFSSTGQLWGTPTYFWSKHKRTNFDWWRKRFKRQFELVDLLRLDHFRGLAGYWRVNGSSKTAISGRWINSPGKTLLNKLKIDLGNDFLPIIAEDLGVITPDVKKLRKYFKLPGMKILQFAFDGNEDNPYLPKNIEGE…
	40512	GC_00000588	HL+LL Core	MIT9202	18892	ECG	146891.A9601_11871	4-alpha-glucanotransferase (EC 2.4.1.25)	G3DSA:3.20.20.80	G3DSA:3.20.20.80			TIGR00217	malQ: 4-alpha-glucanotransferase			G	G			COG1640	4-alpha-glucanotransferase					PF02446	4-alpha-glucanotransferase					SSF51445	SSF51445			MSIQTVIKKKSLGILMHPSCIP-GGRVCGTFGKGAKDWIKKLNSYGIEYWQFLPLTPTDSTGSPYSSPSSFALNPWFLDIDYLIKEDYIFVSNLEELGPTYQ---NKDHFDFDAANNLSKKLGHLLLKGWSYQSENRKNDFNKWIENNSWVEDYATFVVIREEFNMLPWWRWPKEFKIKNNEFLESWINTNSEKILIEKLIQWHLDEQWSVIKKFAKSYNVKLIGDLPFYVSRDSADVWSNKSLFSIFKNGDLIFQSGVPPDYFSSTGQLWGTPTYFWSKHKNTNFDWWRKRFKRQFELMDLLRLDHFRGLAGYWRVNGNSKTAISGRWINSPGRTLLNKLKIDLGTDFLPIIAEDLGLITPDVEKLRKIFELPGMKILQFAFDGNEDNPYLPKNIKGE…
	40517	GC_00000588	HL+LL Core	MIT9211	21782	NA	146891.A9601_11871	4-alpha-glucanotransferase (EC 2.4.1.25)	G3DSA:3.20.20.80	G3DSA:3.20.20.80			TIGR00217	malQ: 4-alpha-glucanotransferase			G	G			COG1640	4-alpha-glucanotransferase					PF02446	4-alpha-glucanotransferase					SSF51445	SSF51445			MIEVNSAKPRFSGVLLHPTSLP-GKRTCGGFGQEARDWLELLAKSGISVWQVLPLSPPDSTGSPYSSPSSFAFNPWLLDVNDLAQQGFIAMDVCNELSSSKQ--DINSSMDFDLANLHSRKLGQALRKEWPIQNSSSHKEFLDWCADQFWLEDHVMFMELRIQNNQLPWWEWPEDLALHNKKELNNFKVNFKEALLEHSLLQWHLDRQWSSIRSLANDLGILIFGDLPFYVSRDSADVWSNRSLFSILANGEMYMQSGVPPDYFSETGQLWGTPVYRWQSNKRSHFRWWRRRLSRQWNQFDLLRLDHFRALDSFWAVPGNDKTAQDGSWIPSPGLKLLKLLKKDYGQK-LPLIAEDLGVITPRVEKLRNYFGLPGMKILQFAFDGNQENPYLPENIRDY…
	40514	GC_00000588	HL+LL Core	MIT9215	23660	EAG	146891.A9601_11871	4-alpha-glucanotransferase (EC 2.4.1.25)	G3DSA:3.20.20.80	G3DSA:3.20.20.80			TIGR00217	malQ: 4-alpha-glucanotransferase			G	G			COG1640	4-alpha-glucanotransferase					PF02446	4-alpha-glucanotransferase					SSF51445	SSF51445			MSIQTVLKKKSLGILMHPSCIP-GGRVCGTFGKGAKDWIKKLSSYGIEYWQILPLTPTDSTGSPYSSPSSFALNPWFLDIDYLIKEGYIFVSNLEELGPTYQ---NKDHFDFDTANNLYKKLGHLLLKGWSYQSEERKNDFNKWIENNSWVEDYATFVVIREEFNMLPWWQWPKEFKIKNNEFLGSWINTNSEKILIEKLIQWHLDEQWSAIKKFAKLYNVKLIGDLPFYVSRDSADVWSNKSLFSIFKNGDLIFQSGVPPDYFSSTGQLWGTPTYFWSKHKNTNFDWWRKRFKRQFELMDLLRLDHFRGLAGYWRVNGNSKTAISGRWINSPGRTLLNKLKIDLGTDFLPIIAEDLGLITPDVEKLRKIFELPGMKILQFAFNGDEDNPYLPKNIEGE…
	40513	GC_00000588	HL+LL Core	MIT9301	25571	ECG	146891.A9601_11871	4-alpha-glucanotransferase (EC 2.4.1.25)	G3DSA:3.20.20.80	G3DSA:3.20.20.80			TIGR00217	malQ: 4-alpha-glucanotransferase			G	G			COG1640	4-alpha-glucanotransferase					PF02446	4-alpha-glucanotransferase					SSF51445	SSF51445			MPKESVLAKKSLGILMHPSCIPGGGGVCGTFGRGAKDWIKKLHRHGIEYWQFLPLTPTDCMGSPYSSPSSFALNPWFLDIDELINNGFIFISNKEELGPTNQ---NKDYFDFNVADALTKKLGYLLLQGWSSQPEETKLDFYKWISRNSWVEDYALFVVIKEEFNMLPWWEWPQEFKLKNNKFLKSWIKKKSEEILIKKLIQWHLDEQWSAIKNFAKSRDIKLIGDLPFYVSRDSSDVWSNRSLFSIFKNGDLIFQSGVPPDYFSSTGQLWGTPTYFWSKHKRTNFNWWRKRFQRQFELVDILRFDHFRGLAGYWRVNGSSKSAINGKWINSPGKTLLNKVKKDLGSNYLPIIAEDLGVITPDVIKLRNFFELPGMKILQFAFDGNEDNPYLPKNIKGE…
	40511	GC_00000588	HL+LL Core	MIT9302	28093	ECG	146891.A9601_11871	4-alpha-glucanotransferase (EC 2.4.1.25)	G3DSA:3.20.20.80	G3DSA:3.20.20.80			TIGR00217	malQ: 4-alpha-glucanotransferase			G	G			COG1640	4-alpha-glucanotransferase					PF02446	4-alpha-glucanotransferase					SSF51445	SSF51445			MSIQTVLKKKSLGILMHPSCIP-GGRECGTFGKGAKDWIKKLHSHGIEYWQFLPLTPTDSTGSPYSSPSSFALNPWFLDIDHLIEKGFIFISNLEELGPTNQ---NKNHFDFDAANNLTIKLGQLLLQGWSSQSEERKLDFNEWIRKNSWVEDYATFVVIREEFNMLPWWQWPKEFKIKNNEFLKSWINTKSEKILIKKLIQWHLDEQWSSIKTFAKLYNVKLIGDLPFYVSRDSADVWSNKSLFSIFKNGDLIFQSGVPPDYFSSTGQLWGTPTYFWSKHKNTNFDWWRKRFKRQFELVDLLRLDHFRGLAGYWRVNGNSKTAISGRWINSPGKILLNKLKIDLGTDLLPIIAEDLGVITPDVEKLRKNFELPGMKILQFAFDGNEDNPYLPKNIEGE…
	40492	GC_00000588	HL+LL Core	MIT9303	29128	ECG	146891.A9601_11871	4-alpha-glucanotransferase (EC 2.4.1.25)	G3DSA:3.20.20.80	G3DSA:3.20.20.80			TIGR00217	malQ: 4-alpha-glucanotransferase			G	G			COG1640	4-alpha-glucanotransferase					PF02446	4-alpha-glucanotransferase					SSF51445	SSF51445			MVEGSSALVRTTGVLLHPTALP-ASPVCGSFGAPSRAWLQSLARHDIGVWQLLPLAPPDATGSPYSSPSSFALNPWLLDADDLVDEDFLSASVLRELPGTVPIQEPCASVDFALADLRSQRLGIALREAWSEQARDHHLAFESWCGKQFWLEDHVLFMELRRQHQGLPWWEWPEGLAAHQRRALNAWKGHHQEALLEHRLLQWQLDRQWQALRHLAGELGVLLFGDLPFYVARDSADVWSHQGLFSILQGGELEIQSGVPPDYFSSTGQLWGTPVYRWWRHRWSGFHWWRSRFVRQWQQVDLLRLDHFRALASYWAVPGSDTTAEHGEWRPSPGAALLKRLRRDAGGI-LPLVAEDLGVITPDVEELRDQFGLPGMKILQFAFDGNPSNPYLPENIKGH…
	40520	GC_00000588	HL+LL Core	MIT9311	31191	ECG	146891.A9601_11871	4-alpha-glucanotransferase (EC 2.4.1.25)	G3DSA:3.20.20.80	G3DSA:3.20.20.80			TIGR00217	malQ: 4-alpha-glucanotransferase			G	G			COG1640	4-alpha-glucanotransferase					PF02446	4-alpha-glucanotransferase					SSF51445	SSF51445			MSIQTALKKKSLGVLMHPSCIP-GGRVCGTFGKGAKDWIKKLHKHGIEYWQFLPLTPTDSTGSPYSSPSSFALNPWFLDVDYLIEEGFIFISNLEELGPSNK---NKNHFDFDIATNLTKKLGRLLLQGWTSQSEERKLDFNQWISKNSWVEDYATFVVIREEFNMLPWWQWPKEFKKKNNKFLKSWIYTKSEEILTKKLIQWHLDKQWRSIKNYAKSYNIKLIGDLPFYVSRDSADVWSNKSLFSIFKNGDLIFQSGVPPDYFSSTGQLWGTPTYFWSKHKSTNFDWWRKRFKRQFELVDLLRLDHFRGLAGYWRVNGNSKTAISGKWINSPGRTLLNKLKIDLGTTYLPIIAEDLGVITPDVEKLRINFELPGMKILQFAFDGNEDNPYLPKNIDGE…
	40506	GC_00000588	HL+LL Core	MIT9312	33998	ECG	146891.A9601_11871	4-alpha-glucanotransferase (EC 2.4.1.25)	G3DSA:3.20.20.80	G3DSA:3.20.20.80			TIGR00217	malQ: 4-alpha-glucanotransferase			G	G			COG1640	4-alpha-glucanotransferase					PF02446	4-alpha-glucanotransferase					SSF51445	SSF51445			MSIQTALKKKSLGVLMHPSCIP-GGRVCGTFGKGAKDWIKKLHKHGIEYWQFLPLTPTDSTGSPYSSPSSFALNPWFLDVDYLIEEGFIFISNLEELGPSNK---NKNHFDFDIATNLTKKLGRLLLQGWTSQSEERKLDFNQWISKNSWVEDYATFVVIREEFNMLPWWQWPKEFKKKNNKFLKSWIYTKSEEILTKKLIQWHLDKQWRSIKNYAKSYNIKLIGDLPFYVSRDSADVWSNKSLFSIFKNGDLIFQSGVPPDYFSSTGQLWGTPTYFWSKHKSTNFDWWRKRFKRQFELVDLLRLDHFRGLAGYWRVNGNSKTAISGKWINSPGRTLLNKLKIDLGTTYLPIIAEDLGVITPDVEKLRINFELPGMKILQFAFDGNEDNPYLPKNIDGE…
	40498	GC_00000588	HL+LL Core	MIT9313	36003	ECG	146891.A9601_11871	4-alpha-glucanotransferase (EC 2.4.1.25)	G3DSA:3.20.20.80	G3DSA:3.20.20.80			TIGR00217	malQ: 4-alpha-glucanotransferase			G	G			COG1640	4-alpha-glucanotransferase					PF02446	4-alpha-glucanotransferase					SSF51445	SSF51445			MVEGSSALVRTTGVLLHPTALP-VSPVCGSFGAPSRAWLQSLARHDIGVWQLLPLAPPDATGSPYSSPSSFALNPWLLDADDLVDEDFLSASVLRELPGTVPIQEPCASVDFALADLRSQRLGIALREAWLEQARDQHLAFESWCGKQFWLEDHVLFMELRRQHQGLPWWEWPEGLAAHQRSALNAWKGHHQEALLEHRLLQWQLDRQWQALRHLAGELGVLLFGDLPFYVARDSADVWSHQGLFSILQGGELEIQSGVPPDYFSSTGQLWGTPVYRWWRHRLSGFHWWRSRFVRQWQQVDLLRLDHFRALASYWAVPGSDSTAEHGEWRSSPGAALLKRLRRDAGGS-LPLIAEDLGVITPDVEELRDQFGLPGMKILQFAFDGNPSNPYLPENIQGH…
	40497	GC_00000588	HL+LL Core	MIT9314	37537	ECG	146891.A9601_11871	4-alpha-glucanotransferase (EC 2.4.1.25)	G3DSA:3.20.20.80	G3DSA:3.20.20.80			TIGR00217	malQ: 4-alpha-glucanotransferase			G	G			COG1640	4-alpha-glucanotransferase					PF02446	4-alpha-glucanotransferase					SSF51445	SSF51445			MPIESIIPRKSLGVLMHPTCIP-GGRVCGTFGRGAKDWIKKLHKHGIEYWQFLPLTPTDSTGSPYSSPSSFALNPWFLDIDNLIEKGFIFISNKDNLGPTNQ---DKDHFDFNIAEDLTKKIGLLLLQGWSSQSEERKINFNQWVSRNSWVEDYATFVVIREEFNMLPWWEWPQEFKIKNNKFLESWIKKKSEEILIKKLIQWHLDEQWSVIKNFAKSRNIKLIGDLPFYVSRDSADVWSNKSLFSIFKNGDLIFQSGVPPDYFSSTGQLWGTPTYFWSKHKRTNFNWWRKRFQRQFELVDILRFDHFRGLAGYWRVNGSSKTAINGKWINSPGKTLLNKVKQDLGGNYLPVIAEDLGVITPDVEKLRKNFELPGMKILQFAFDGNEDNPYLPKNIEGE…
	40504	GC_00000588	HL+LL Core	MIT9321	39286	EAG	146891.A9601_11871	4-alpha-glucanotransferase (EC 2.4.1.25)	G3DSA:3.20.20.80	G3DSA:3.20.20.80			TIGR00217	malQ: 4-alpha-glucanotransferase			G	G			COG1640	4-alpha-glucanotransferase					PF02446	4-alpha-glucanotransferase					SSF51445	SSF51445			MPIQKVLPKKSLGVLMHPSCIP-GGGVCGTFGKGAKEWIKKLYNNGIEYWQFLPLTPTDSKGSPYSSPSSFALNPWFLDIEDLIEKGFIFISNKDELVLTID---NKDYFDFAVADDLTKKLGHLLLQGWSSQSEKRKLNFYQWISNNYWIEDYATFMVIKEEFNKSPWWQWPQEFKTKNNKFLKSWIKKKSEEILIEKLIQWHLDQQWRSIRKFANSLNIKLIGDLPFYVSRDSADVWSNKSIFSIFKNGDLIFQSGVPPDYFSATGQLWGTPTYFWSKHKRSNFAWWRKRFKRQFELMDLLRLDHFRGLAGYWRINGNAKSAICGKWINSPGRMLLNKIKKDLGTDYLPIIAEDLGVITPDVEKLRKNFKLPGMKILQFAFDGNEDNPYLPKNIEGE…
	40495	GC_00000588	HL+LL Core	MIT9322	41834	EAG	146891.A9601_11871	4-alpha-glucanotransferase (EC 2.4.1.25)	G3DSA:3.20.20.80	G3DSA:3.20.20.80			TIGR00217	malQ: 4-alpha-glucanotransferase			G	G			COG1640	4-alpha-glucanotransferase					PF02446	4-alpha-glucanotransferase					SSF51445	SSF51445			MPIQKVLPKKSLGVLMHPSCIP-GGGVCGTFGKGAKEWIKKLYNNGIEYWQFLPLTPTDSKGSPYSSPSSFALNPWFLDIEDLIEKGFIFISNKDELVLTID---NKDYFDFAVADDLTKKLGHLLLQGWSSQSEKRKLNFYQWISNNYWIEDYATFMVIKEEFNKSPWWQWPQEFKTKNNKFLKSWIKKKSEEILIEKLIQWHLDQQWRSIRKFANSLNIKLIGDLPFYVSRDSADVWSNKSIFSIFKNGDLIFQSGVPPDYFSATGQLWGTPTYFWSKHKRSNFAWWRKRFKRQFELMDLLRLDHFRGLAGYWRINGNAKSAICGKWINSPGRMLLNKIKKDLGTDYLPIIAEDLGVITPDVEKLRKNFKLPGMKILQFAFDGNEDNPYLPKNIEGE…
	40516	GC_00000588	HL+LL Core	MIT9401	43051	EAG	146891.A9601_11871	4-alpha-glucanotransferase (EC 2.4.1.25)	G3DSA:3.20.20.80	G3DSA:3.20.20.80			TIGR00217	malQ: 4-alpha-glucanotransferase			G	G			COG1640	4-alpha-glucanotransferase					PF02446	4-alpha-glucanotransferase					SSF51445	SSF51445			MPIQKVLPKKSLGVLMHPSCIP-GGGVCGTFGKGAKEWIKKLYNNGIEYWQFLPLTPTDSKGSPYSSPSSFALNPWFLDIEDLIEKGFIFISNKDELVLTID---NKDYFDFAVADDLTKKLGHLLLQGWSSQSEKRKLNFYQWISNNYWIEDYATFMVIKEEFNKSPWWQWPQEFKTKNNKFLKSWIKKKSEEILIEKLIQWHLDQQWRSIRKFANSLNIKLIGDLPFYVSRDSADVWSNKSIFSIFKNGDLIFQSGVPPDYFSATGQLWGTPTYFWSKHKRSNFAWWRKRFKRQFELMDLLRLDHFRGLAGYWRINGNAKSAICGKWINSPGRMLLNKIKKDLGTDYLPIIAEDLGVITPDVEKLRKNFKLPGMKILQFAFDGNEDNPYLPKNIEGE…
	40496	GC_00000588	HL+LL Core	MIT9515	46059	ECG	146891.A9601_11871	4-alpha-glucanotransferase (EC 2.4.1.25)	G3DSA:3.20.20.80	G3DSA:3.20.20.80			TIGR00217	malQ: 4-alpha-glucanotransferase			G	G			COG1640	4-alpha-glucanotransferase					PF02446	4-alpha-glucanotransferase					SSF51445	SSF51445			MTLKSVLKKKSLGILFHPSSIP-GGSYSGTFGKGAKEWIEKLSKHKIDFWQFLPLTPTDSTGSPYSSPSSFALNPWFLDINELIEKHFIFLSNKQELQSDNQ---SESHFDFDFANKLSKSLGEYLLIGWESQSEERKTDFYKWNKKNNWVDDYSLFMTIREEFNMLPWWEWPFEFKQRKIELLKPWLKDKSNEILKTKLIQWHLNKQWLNIKEFAKNKGITLVGDLPFYVSRDSADVWSNKSLFSISQNGKLLFQSGVPPDYFSSNGQLWGTPTYYWSKHKRTNFKWWRERFKRQFELVDILRLDHFRALAGYWRIDGDAKNAINGTWINSPGKDLLNILKKDFNSNYLPIIAEDLGVITKDVELLRNNYELPGMKILQFAFDGNENNPYLPKNITGE…
	40519	GC_00000588	HL+LL Core	NATL1A	48146	ECG	146891.A9601_11871	4-alpha-glucanotransferase (EC 2.4.1.25)	G3DSA:3.20.20.80	G3DSA:3.20.20.80			TIGR00217	malQ: 4-alpha-glucanotransferase			G	G			COG1640	4-alpha-glucanotransferase					PF02446	4-alpha-glucanotransferase					SSF51445	SSF51445			MKLE-----RNSGILLHPTSLP-DSPVCGSFGKPAREWLNELAAFGIGVWQFLPLAPTDLFGSPYSSPSSFALNPWFLDQNDLVRDGFL-ANNLEDFSSAND--CFNNRVDFHLANSKVKFLRFSLVDDWYKQNRTIQEEFEIWCSKQFWLDDHSIFMELKIQNNDLPWWEWPVEYAGRDKKELENWKKNNQKELLGHKLLQWHLDRQWQSIRALAKNLGIYLFGDVPFYVSKDSADVWGNRSLFSILTNSDTFLQSGVPPDYFSETGQLWGNPVYRWSRHKSSRYRWWRKRISRHLEQVDFLRLDHFRALEAFWAIPGKDKTAENGFWLPSPGKQILSLIKKDCCGS-LPLIAEDLGLVTSKVEKLRDDYELAGMKILQFAFDGNLDNPYLPENIKEE…
	40494	GC_00000588	HL+LL Core	NATL2A	50124	ECG	146891.A9601_11871	4-alpha-glucanotransferase (EC 2.4.1.25)	G3DSA:3.20.20.80	G3DSA:3.20.20.80			TIGR00217	malQ: 4-alpha-glucanotransferase			G	G			COG1640	4-alpha-glucanotransferase					PF02446	4-alpha-glucanotransferase					SSF51445	SSF51445			MKLE-----RNSGILLHPTSLP-DSPVCGSFGKPAREWLNELAAFGIGVWQFLPLAPTDSLGSPYSSPSSFALNPWFLDQNDLVRDGFL-ANNLEDFSSAND--CFKNRVDFHLANSKVKSLRFSLVDDWYKQNRTIQEEFEIWCSKQFWLDDHSIFMELKIQNNDLPWWEWPEEYACRDKKELENWKKNNQKELLGHKLLQWHLDRQWQSIRELAKNLGIYLFGDVPFYVSKDSADVWGNRSLFSILTNSDTFLQSGVPPDYFSETGQLWGNPVYRWSRHKASRYRWWRKRISRHLEQVDFLRLDHFRALEAFWAIPGKDKTAENGLWLPSPGKQILSLIKKDCCGS-LPLIAEDLGLVTSKVEKLRDDYELAGMKILQFAFDGNLDNPYLPENIKEE…
	40493	GC_00000588	HL+LL Core	PAC1	52119	ECG	146891.A9601_11871	4-alpha-glucanotransferase (EC 2.4.1.25)	G3DSA:3.20.20.80	G3DSA:3.20.20.80			TIGR00217	malQ: 4-alpha-glucanotransferase			G	G			COG1640	4-alpha-glucanotransferase					PF02446	4-alpha-glucanotransferase					SSF51445	SSF51445			MKLE-----RNSGILLHPTSLP-DSPVCGSFGKPAREWLNELAAFGIGVWQFLPLAPTDSFGSPYSSPSSFALNPWFLDQNDLVRDGFL-ANNLEDFSSAND--CSKNRVDFHLANSKVKSLRFSLVDDWYKQNRTIQEEFEIWCSKQFWLDDHSIFMELKIQNNDLPWWEWPDEYAGRDKKELENWKKNNQKELLGHKLLQWHLDRQWQSIRELAKNLGIYLFGDVPFYVSKDSADVWGNRSLFSILTNSDTFLQSGVPPDYFSETGQLWGNPVYRWSRHKASRYRWWRKRISRHLEQVDFLRLDHFRALEAFWAIPGKDKTAENGLWLPSPGKQILSLIKKDCCGS-LPLIAEDLGLVTSKVEKLRDDYELAGMKILQFAFDGNLDNPYLPENIKEE…
	40508	GC_00000588	HL+LL Core	SB	53326	ECG	146891.A9601_11871	4-alpha-glucanotransferase (EC 2.4.1.25)	G3DSA:3.20.20.80	G3DSA:3.20.20.80			TIGR00217	malQ: 4-alpha-glucanotransferase			G	G			COG1640	4-alpha-glucanotransferase					PF02446	4-alpha-glucanotransferase					SSF51445	SSF51445			MPIDSIIARKSLGLLMHPTCIP-GGRVCGTFGRGAKEWIKKLHKYGIEYWQFLPLTPTDSTGSPYSSPSSFALNPWFLDIEDLIEKGFIFISNKDNLGPITQ---NKDHFDFDIADDLTKKLGLLLLQGWSSQSEERKINFNKWVSRHSWVEDYATFVVIREEFNMLPWWEWPQEFKIKNKKFLKSWIKKKSEEILIKKLIQWHLDEQWSVIKNFAKSKNIKLIGDLPFYVSRDSADVWSNKSLFSIFKNGDLIFQSGVPPDYFSSTGQLWGTPTYFWSKHKRTNFNWWRKRFQRQFELVDILRFDHFRGLAGYWRVNGSSKTAIIGKWINSPGKTLLNKVKKDLGGNYLPIIAEDLGVITPDVEKLRKNFELPGMKILQFAFDGNEDNPYLPKNIEGE…
	40491	GC_00000588	HL+LL Core	SS2	56149	NA	146891.A9601_11871	4-alpha-glucanotransferase (EC 2.4.1.25)	G3DSA:3.20.20.80	G3DSA:3.20.20.80			TIGR00217	malQ: 4-alpha-glucanotransferase			G	G			COG1640	4-alpha-glucanotransferase					PF02446	4-alpha-glucanotransferase					SSF51445	SSF51445			MGFNSSAHPRFSGVLLHPSSLP-SGGVCGTFGQPSRDWIKLLSENQIAVWQILPLAPPDSFGSPYSSPSGFAFNPWFLDANDLAKEGFINSDDINEFSETLP--SDSSKIDFTLATRRSNEIGKALIKNWKNQDSGKQIEFLDWSSNQHWLDDHVCFMELRRQFSYLPWWEWPSAFSSRNQNELGLWKIKHKDDLLEHALVQWHLNRQWNLLRKIAKKFNVAIFGDLPFYVSRDSADVWGNRSLFSIFSKGDLHSQSGVPPDYFSETGQLWGTPVYRWQKHKRTRFRWWRNRIRRQWLQVDLLRLDHFRALNSYWSVPGGQKTAQHGCWLPSPGLELLTILQQDYGKS-LPLVAEDLGVITKQVNSLREHFGFPGMKILQFAFNGDPSNPYLPENFIGH…
	40518	GC_00000588	HL+LL Core	SS35	57438	NA	146891.A9601_11871	4-alpha-glucanotransferase (EC 2.4.1.25)	G3DSA:3.20.20.80	G3DSA:3.20.20.80			TIGR00217	malQ: 4-alpha-glucanotransferase			G	G			COG1640	4-alpha-glucanotransferase					PF02446	4-alpha-glucanotransferase					SSF51445	SSF51445			MGFNSSAHPRFSGVLLHPSSLP-SGGVCGTFGQPSRDWIKLLSENQIAVWQILPLAPPDSFGSPYSSPSGFAFNPWFLDANDLAKEGFINSDDINEFSETLP--SDSSKIDFTLATRRSNEIGKALIKNWKNQDSGKQIEFLDWSSNQHWLDDHVCFMELRRQFSYLPWWEWPSAFSSRNQNELGLWKIKHKDDLLEHALVQWHLNRQWNLLRKIAKKFNVAIFGDLPFYVSRDSADVWGNRSLFSIFSKGDLHSQSGVPPDYFSETGQLWGTPVYRWQKHKRTRFRWWRNRIRRQWLQVDLLRLDHFRALNSYWSVPGGQKTAQHGCWLPSPGLELLTILQQDYGKS-LPLVAEDLGVITKQVNSLREHFGFPGMKILQFAFNGDPSNPYLPENFIGH…
	40510	GC_00000588	HL+LL Core	SS51	59766	NA	146891.A9601_11871	4-alpha-glucanotransferase (EC 2.4.1.25)	G3DSA:3.20.20.80	G3DSA:3.20.20.80			TIGR00217	malQ: 4-alpha-glucanotransferase			G	G			COG1640	4-alpha-glucanotransferase					PF02446	4-alpha-glucanotransferase					SSF51445	SSF51445			MGFNSSAHPRFSGVLLHPSSLP-SGGVCGTFGQPSRDWIKLLSENQIAVWQILPLAPPDSFGSPYSSPSGFAFNPWFLDANDLAKEGFINSDDINEFSETLP--SDSSKIDFTLATRRSNEIGKALIKNWKNQDSGKQIEFLDWSSNQHWLDDHVCFMELRRQFSYLPWWEWPSAFSSRNQNELGLWKIKHKDDLLEHALVQWHLNRQWNLLRKIAKKFNVAIFGDLPFYVSRDSADVWGNRSLFSIFSKGDLHSQSGVPPDYFSETGQLWGTPVYRWQKHKRTRFRWWRNRIRRQWLQVDLLRLDHFRALNSYWSVPGGQKTAQHGCWLPSPGLELLTILQQDYGKS-LPLVAEDLGVITKQVNSLREHFGFPGMKILQFAFNGDPSNPYLPENFIGH…
	1639	GC_00001569		AS9601	91	ECG	146891.A9601_00911	4-phosphopantetheinyl transferase	G3DSA:3.90.470.20	G3DSA:3.90.470.20																	PF01648	4'-phosphopantetheinyl transferase superfamily					SSF56214	SSF56214			#NAME?
	1640	GC_00001569		GP2	5818	ECG	146891.A9601_00911	4-phosphopantetheinyl transferase	G3DSA:3.90.470.20	G3DSA:3.90.470.20																	PF01648	4'-phosphopantetheinyl transferase superfamily					SSF56214	SSF56214			#NAME?
	1638	GC_00001569		MIT9107	12930	ECG	93060.P9215_00911	4-phosphopantetheinyl transferase	G3DSA:3.90.470.20	G3DSA:3.90.470.20																	PF01648	4'-phosphopantetheinyl transferase superfamily					SSF56214	SSF56214			#NAME?
	1637	GC_00001569		MIT9116	14927	ECG	93060.P9215_00911	4-phosphopantetheinyl transferase	G3DSA:3.90.470.20	G3DSA:3.90.470.20																	PF01648	4'-phosphopantetheinyl transferase superfamily					SSF56214	SSF56214			#NAME?
	1641	GC_00001569		MIT9123	15215	ECG	93060.P9215_00911	4-phosphopantetheinyl transferase	G3DSA:3.90.470.20	G3DSA:3.90.470.20																	PF01648	4'-phosphopantetheinyl transferase superfamily					SSF56214	SSF56214			#NAME?
	1643	GC_00001569		MIT9201	18724	ECG	93060.P9215_00911	4-phosphopantetheinyl transferase	G3DSA:3.90.470.20	G3DSA:3.90.470.20																	PF01648	4'-phosphopantetheinyl transferase superfamily					SSF56214	SSF56214			#NAME?
	1647	GC_00001569		MIT9202	19723	ECG	93060.P9215_00911	4-phosphopantetheinyl transferase	G3DSA:3.90.470.20	G3DSA:3.90.470.20																	PF01648	4'-phosphopantetheinyl transferase superfamily					SSF56214	SSF56214			#NAME?
	1649	GC_00001569		MIT9215	22567	ECG	93060.P9215_00911	4-phosphopantetheinyl transferase	G3DSA:3.90.470.20	G3DSA:3.90.470.20																	PF01648	4'-phosphopantetheinyl transferase superfamily					SSF56214	SSF56214			#NAME?
	1648	GC_00001569		MIT9301	24518	ECG	167546.P9301_00901	4-phosphopantetheinyl transferase	G3DSA:3.90.470.20	G3DSA:3.90.470.20																	PF01648	4'-phosphopantetheinyl transferase superfamily					SSF56214	SSF56214			#NAME?
	1646	GC_00001569		MIT9302	26423	ECG	146891.A9601_00911	4-phosphopantetheinyl transferase	G3DSA:3.90.470.20	G3DSA:3.90.470.20																	PF01648	4'-phosphopantetheinyl transferase superfamily					SSF56214	SSF56214			#NAME?
	1651	GC_00001569		MIT9311	32265	ECG	74546.PMT9312_0081	4-phosphopantetheinyl transferase	G3DSA:3.90.470.20	G3DSA:3.90.470.20							H	H			COG2091	Phosphopantetheinyl transferase					PF01648	4'-phosphopantetheinyl transferase superfamily					SSF56214	SSF56214			MKLLNEYKYKIPKIWFYEIKGVQDVVTIEEIKTAKKLSGLRSKVYLETRAYLRKSLSTLFDLDPLEIPINAHPGKPPKLALGMGNISLSHCKDAVTIVWHKNKIGIDIERKDRDFNHVKFAEKYFFHTNKSIQNKNMTKNMILNQWCAVEAAIKWDHGRLSKDINHWQYFEKPKELIHNKKNLHLHYSQINFHNWTIALAYEEKTSFNTEIICCSKNF
	1644	GC_00001569		MIT9312	32948	ECG	74546.PMT9312_0081	4-phosphopantetheinyl transferase	G3DSA:3.90.470.20	G3DSA:3.90.470.20							H	H			COG2091	Phosphopantetheinyl transferase					PF01648	4'-phosphopantetheinyl transferase superfamily					SSF56214	SSF56214			MKLLNEYKYKIPKIWFYEIKGVQDVVTIEEIKTAKKLSGLRSKVYLETRAYLRKSLSTLFDLDPLEIPINAHPGKPPKLALGMGNISLSHCKDAVTIVWHKNKIGIDIERKDRDFNHVKFAEKYFFHTNKSIQNKNMTKNMILNQWCAVEAAIKWDHGRLSKDINHWQYFEKPKELIHNKKNLHLHYSQINFHNWTIALAYEEKTSFNTEIICCSKNF
	1636	GC_00001569		MIT9314	38417	ECG	146891.A9601_00911	4-phosphopantetheinyl transferase	G3DSA:3.90.470.20	G3DSA:3.90.470.20																	PF01648	4'-phosphopantetheinyl transferase superfamily					SSF56214	SSF56214			#NAME?
	1642	GC_00001569		MIT9321	39432	ECG	146891.A9601_00911	4-phosphopantetheinyl transferase	G3DSA:3.90.470.20	G3DSA:3.90.470.20																							SSF56214	SSF56214			#NAME?
	1634	GC_00001569		MIT9322	41560	ECG	146891.A9601_00911	4-phosphopantetheinyl transferase	G3DSA:3.90.470.20	G3DSA:3.90.470.20																							SSF56214	SSF56214			#NAME?
	1650	GC_00001569		MIT9401	44831	ECG	146891.A9601_00911	4-phosphopantetheinyl transferase	G3DSA:3.90.470.20	G3DSA:3.90.470.20																							SSF56214	SSF56214			#NAME?
	1635	GC_00001569		MIT9515	44992	ECG	167542.P9515_00881	4-phosphopantetheinyl transferase	G3DSA:3.90.470.20	G3DSA:3.90.470.20							H	H			COG2091	Phosphopantetheinyl transferase					PF01648	4'-phosphopantetheinyl transferase superfamily					SSF56214	SSF56214			MTLLNNYDSKIPKIWFHKIKGVQDVATLKELEIANKLSKQRANIFLESRAYIRQSLGTLFNINPLEIPIIADPGEPPKLPKGMGYLSFSHCCDAIILVWHEKKIGIDIERVDRDFSYMKLAKKYFLTSKKSNQTSESYKKSILNQWCAIEAAIKWNHGKLSEDLKEWQYYENEKTLFHNAKKLKLKFTQITFYKWTISLAYKDISQLISNIICSSKII
	1645	GC_00001569		SB	53967	ECG	146891.A9601_00911	4-phosphopantetheinyl transferase	G3DSA:3.90.470.20	G3DSA:3.90.470.20							H	H			COG2091	Phosphopantetheinyl transferase					PF01648	4'-phosphopantetheinyl transferase superfamily					SSF56214	SSF56214			#NAME?
	15245	GC_00002734		CCMP1375	1958	NA	167539.Pro0092	4-phosphopantetheinyl transferase	G3DSA:3.90.470.20	G3DSA:3.90.470.20							H	H			COG2091	Phosphopantetheinyl transferase					PF01648	4'-phosphopantetheinyl transferase superfamily					SSF56214	SSF56214			MDSPLKEISISEEKIANSLHPRRAKEYKHARSYVRFALSQFFKLNPLEIPLKASIGKAPLLGNNLGHVSFSHCNDALLIGWSPTKLGVDIERSDRALSAEGISERFFHKYDQNNLKSLNNEDFRKKVLEQWVIKEAAIKWQRGTLSKDLKNWHIKNKSNVAIHQTLNHEVKIQTTIYRSWIIAIASNDNQGKGDLMICAN
	15242	GC_00002734		LG	8442	NA	167539.Pro0092	4-phosphopantetheinyl transferase	G3DSA:3.90.470.20	G3DSA:3.90.470.20							H	H			COG2091	Phosphopantetheinyl transferase					PF01648	4'-phosphopantetheinyl transferase superfamily					SSF56214	SSF56214			MDSPLKEISISEEKIANSLHPRRAKEYKHARSYVRFALSQFFKLNPLEIPLKASIGKAPLLGNNLGHVSFSHCNDALLIGWSPTKLGVDIERSDRALSAEGISERFFHKYDQNNLKSLNNEDFRKKVLEQWVIKEAAIKWQRGTLSKDLKNWHIKNKSNVAIHQTLNHEVKIQTTIYRSWIIAIASNDNQGKGDLMICAN
	15241	GC_00002734		SS2	56253	NA	167539.Pro0092	4-phosphopantetheinyl transferase	G3DSA:3.90.470.20	G3DSA:3.90.470.20							H	H			COG2091	Phosphopantetheinyl transferase					PF01648	4'-phosphopantetheinyl transferase superfamily					SSF56214	SSF56214			MDSPLKEISISEEKIANSLHPRRAKEYKHARSYVRFALSQFFKLNPLEIPLKASIGKAPLLGNNLGHVSFSHCNDALLIGWSPTKLGVDIERSDRALSAEGISERFFHKYDQNNLKSLNNEDFRKKVLEQWVIKEAAIKWQRGTLSKDLKNWHIKNKSNVAIHQTLNHEVKIQTTIYRSWIIAIASNDNQGKGDLMICAN
	15244	GC_00002734		SS35	57894	NA	167539.Pro0092	4-phosphopantetheinyl transferase	G3DSA:3.90.470.20	G3DSA:3.90.470.20							H	H			COG2091	Phosphopantetheinyl transferase					PF01648	4'-phosphopantetheinyl transferase superfamily					SSF56214	SSF56214			MDSPLKEISISEEKIANSLHPRRAKEYKHARSYVRFALSQFFKLNPLEIPLKASIGKAPLLGNNLGHVSFSHCNDALLIGWSPTKLGVDIERSDRALSAEGISERFFHKYDQNNLKSLNNEDFRKKVLEQWVIKEAAIKWQRGTLSKDLKNWHIKNKSNVAIHQTLNHEVKIQTTIYRSWIIAIASNDNQGKGDLMICAN
	15243	GC_00002734		SS51	59187	NA	167539.Pro0092	4-phosphopantetheinyl transferase	G3DSA:3.90.470.20	G3DSA:3.90.470.20							H	H			COG2091	Phosphopantetheinyl transferase					PF01648	4'-phosphopantetheinyl transferase superfamily					SSF56214	SSF56214			MDSPLKEISISEEKIANSLHPRRAKEYKHARSYVRFALSQFFKLNPLEIPLKASIGKAPLLGNNLGHVSFSHCNDALLIGWSPTKLGVDIERSDRALSAEGISERFFHKYDQNNLKSLNNEDFRKKVLEQWVIKEAAIKWQRGTLSKDLKNWHIKNKSNVAIHQTLNHEVKIQTTIYRSWIIAIASNDNQGKGDLMICAN
	29165	GC_00003772		NATL1A	46914	ECG	167555.NATL1_01431	4-phosphopantetheinyl transferase	G3DSA:3.90.470.20	G3DSA:3.90.470.20							H	H			COG2091	Phosphopantetheinyl transferase					PF01648	4'-phosphopantetheinyl transferase superfamily					SSF56214	SSF56214			MPSKLLPISSEEKKWVQKLAPSRGLIYHFSRGCLRHVMSNITGLGPLDIPLKADPGEPPLLAEGWGNISMSHCSDALLIGWSSGKIGVDIERKDREFQAYKLSKRFFTQYENYEIENLSPCQAKDLVLKRWVIKEAAVKWQRGKIANNINQWTWKNKSSFAHHKKLGHKVKVYEQNYDQWTYAIALDEDSITCKPIICVD
	29164	GC_00003772		NATL2A	48929	ECG	167555.NATL1_01431	4-phosphopantetheinyl transferase	G3DSA:3.90.470.20	G3DSA:3.90.470.20							H	H			COG2091	Phosphopantetheinyl transferase					PF01648	4'-phosphopantetheinyl transferase superfamily					SSF56214	SSF56214			MPSKLLPISSEEKKWVQKLAPSRGLIYHFSRGCLRHVMSNITGLGPLDIPLKADPGEPPLLAEGWGNISMSHCSDALLIGWSSGKIGVDIERKDREIQAYKLSKRFFTQYENYEIENLSPCQAKELVLKRWVIKEAAVKWQRGKIANNINQWIWKNKSSFAHHKKLGHKVKVYEQNYDQWTYAIALDEDSITCKPIICVD
	29163	GC_00003772		PAC1	51246	ECG	167555.NATL1_01431	4-phosphopantetheinyl transferase	G3DSA:3.90.470.20	G3DSA:3.90.470.20							H	H			COG2091	Phosphopantetheinyl transferase					PF01648	4'-phosphopantetheinyl transferase superfamily					SSF56214	SSF56214			MPSKLLPISSEEKKWVQKLAPSRGLIYHFSRGCLRHVMSNITGLGPLDIPLKADPGEPPLLAEGWGNISMSHCSDALLIGWSSGKIGVDIERKDREFQAYKLSKRFFTQDENYEIENLSPCQAKELVLKRWVIKEAAVKWQRGKIANNINQWIWKNKSSFAHHKKLGHKVKVYEQNYDQWTYAIALDEDSITCKPIICVD
	32790	GC_00004997		MIT9303	28485	ECG	93059.P9211_12431	4-phosphopantetheinyl transferase	G3DSA:3.90.470.20	G3DSA:3.90.470.20							H	H			COG2091	Phosphopantetheinyl transferase											SSF56214	SSF56214			MPLQLNSRSVLALWLFPMQAPLMPISTEEEQWAGRLSARRSRQFRQSRGYVRHALADLWQVSALEIPLQAPPGKPPELANGLGYISFSHCQDALLVGWSPQRVGVDLERSDRPIAAELLARRYFCADDQVALCHLRGAALRDAVLEQWLSKEAAIKWQRGSLAADLIHWRCGVDSAFAVHELLGHQVDVHRIHHNIWSMAVVSDFSAMSNSPMLCLV
	32791	GC_00004997		MIT9313	36612	ECG	93059.P9211_12431	4-phosphopantetheinyl transferase	G3DSA:3.90.470.20	G3DSA:3.90.470.20							H	H			COG2091	Phosphopantetheinyl transferase					PF01648	4'-phosphopantetheinyl transferase superfamily					SSF56214	SSF56214			MPLPLNSRSVLALWLFPMQAPLMPISPEEEQWAGRLSARRSRQFRQSRGYVRDALADLWQVSALEIPLQAPPGKPPELANGWGYISFSHCQDALLVGWSPQRVGVDLERSDRPIAAELLARRYFCADDQSALCHLRGAALRDAVLEQWLSKEAAIKWQRGSLAADLIHWRCGVDSVFAVHEVLGHQVDVHRIHHNLWSMAVVSDFSAMSNAPMLCLV
	35682	GC_00006257	Singletons	MIT9211	21906	NA	93059.P9211_12431	4-phosphopantetheinyl transferase	G3DSA:3.90.470.20	G3DSA:3.90.470.20							H	H			COG2091	Phosphopantetheinyl transferase					PF01648	4'-phosphopantetheinyl transferase superfamily					SSF56214	SSF56214			MKRAASNEIALWSFRVNAPLKVISKQEEDWSIGLSPRRSLQFKHSRGHVRSALGDLWKISPLDIPLYAPPGKPPELSSGWGNISFSHCNDRLFIGWSSRSIGVDIERVDRNLQANKLNNRYFSKQEDHSLDELSEEGFRKAILEKWVLNEAAIKWQKGNIASDMPNWVFYKESNLAVHKILGFTIALKIIHFESWYTAIAYDKSLINEPIIICQK
	8365	GC_00001486	HL Core	AS9601	1712	ECG	146891.A9601_17671	4Fe-4S ferredoxin, iron-sulfur binding	G3DSA:3.30.70.20	G3DSA:3.30.70.20							R	R			COG1149	MinD superfamily P-loop ATPase, contains an inserted ferredoxin domain					PF12617	Iron-Sulfur binding protein C terminal	PS51379	4Fe-4S ferredoxin-type iron-sulfur binding domain profile.			SSF54862	SSF54862	PS00198	4Fe-4S ferredoxin-type iron-sulfur binding region signature.	-------MIKTKNKKDKWIKLICGASNEDIVAIEDLCAIYTAAGVDYIDVAAEESIVYAAKKGIDWAKKVFKNSPGLMISISDGNDIHFRKAKFDPLKCPPSCPRPCEKVCPTFAIDNFGIKESKCYGCGRCLNSCPLNLISEYEYNLSKNNLASTLQKIRPNAVEIHTEINRLDSFTKVVSILTSSGMKLDKISISCGLNQSFKKAQEPDDLLKALWERYEILKKLDIPLIWQLDGRPMSGDLAPSTSRDAVKLFEKIGSDLPPGLIQLAGGTNEKTHELLNSNNLPDGIAFGSAARKIMQPLIEFAHKNDKKLYEYPEIMGLAIQKAQKFLEPWKSRSFK
	8377	GC_00001486	HL Core	EQPAC1	4757	ECG	59919.PMM1560	4Fe-4S ferredoxin, iron-sulfur binding	G3DSA:3.30.70.20	G3DSA:3.30.70.20							C	C			COG1142	Fe-S-cluster-containing hydrogenase component 2					PF12617	Iron-Sulfur binding protein C terminal	PS51379	4Fe-4S ferredoxin-type iron-sulfur binding domain profile.			SSF54862	SSF54862	PS00198	4Fe-4S ferredoxin-type iron-sulfur binding region signature.	MNSEIDLFKKNKKGSDKWVKLICGASNEDIVAIEDLSAIYSAAGVDYIDVAADESIVEAARNGIKWAKKLYGASPGLMISISDGKDIHFRKAKFDPLKCPSNCPRPCERICPTFAIDYSGVKENKCYGCGRCINSCPLNLISEYEYKLSNNDLPKTLQTIKPDAVEIHTEINRLDSFIQVANILKTSGIELKKISVSCGLNQSQK---GPKDLLKALWDRYEILVEHNVPLIWQLDGRPMSGDLAPSTGKDTVKLWNNIGSHLPPGLIQLAGGTNGKTHEFLKINNFPDGIAFGSSARKIMQPLIEDANKNNKKLYEYPEKMDLAIKKAQKLLNPWKIS---
	8366	GC_00001486	HL Core	GP2	7221	ECG	167546.P9301_17511	4Fe-4S ferredoxin, iron-sulfur binding	G3DSA:3.30.70.20	G3DSA:3.30.70.20							R	R			COG1149	MinD superfamily P-loop ATPase, contains an inserted ferredoxin domain					PF12617	Iron-Sulfur binding protein C terminal	PS51379	4Fe-4S ferredoxin-type iron-sulfur binding domain profile.			SSF54862	SSF54862	PS00198	4Fe-4S ferredoxin-type iron-sulfur binding region signature.	-------MITTKNTKDKWIKLICGASNEDIVAIEDLCAIYTAAGVDYIDVAAEESIVHAAKKGIEWAKKVFENSPGLMISISDGNDIHFRKAKFDPLKCPPNCPRPCEKACPTFAIDNSGIKKSKCYGCGRCLNSCPLNLISEYEYNLSKDDLGSTLQRIKPNAVEIHTEINRLESFAKVVRILESSEIKLDKLSISCGLNQSFKKSQEPEDLLKALWERYEIIKKLDIPLIWQLDGRPMSGDLAPSTSRDTVKLFEKIGSNLPPGLIQLAGGTNEKTHEFLNSNNLPDGIAFGSAARKIMQPLIELAHKNNKKLYEYPETMALAIKKAKKFLEPWKSSSFK
	8371	GC_00001486	HL Core	MED4	10986	ECG	59919.PMM1560	4Fe-4S ferredoxin, iron-sulfur binding	G3DSA:3.30.70.20	G3DSA:3.30.70.20							C	C			COG1142	Fe-S-cluster-containing hydrogenase component 2					PF12617	Iron-Sulfur binding protein C terminal	PS51379	4Fe-4S ferredoxin-type iron-sulfur binding domain profile.			SSF54862	SSF54862	PS00198	4Fe-4S ferredoxin-type iron-sulfur binding region signature.	MNSEIDLFKKNKKGSDKWVKLICGASNEDIVAIEDLSAIYSAAGVDYIDVAADESIVEAARNGIKWAKKLYGASPGLMISISDGKDIHFRKAKFDPLKCPSNCPRPCERICPTFAIDYSGVKENKCYGCGRCINSCPLNLISEYEYKLSNNDLPKTLQTIKPDAVEIHTEINRLDSFIQVANILKTSGIELKKISVSCGLNQSQK---GPKDLLKALWDRYEILVEHNVPLIWQLDGRPMSGDLAPSTGKDTVKLWNNIGSHLPPGLIQLAGGTNGKTHEFLKINNFPDGIAFGSSARKIMQPLIEDANKNNKKLYEYPEKMDLAIKKAQKLLNPWKIS---
	8364	GC_00001486	HL Core	MIT9107	11670	ECG	167546.P9301_17511	4Fe-4S ferredoxin, iron-sulfur binding	G3DSA:3.30.70.20	G3DSA:3.30.70.20							R	R			COG1149	MinD superfamily P-loop ATPase, contains an inserted ferredoxin domain					PF12617	Iron-Sulfur binding protein C terminal	PS51379	4Fe-4S ferredoxin-type iron-sulfur binding domain profile.			SSF54862	SSF54862	PS00198	4Fe-4S ferredoxin-type iron-sulfur binding region signature.	-------MIKTKNKKDKWIKLICGASNEDIVAIEDLCAIYTAAGVDYIDVAAEESIVHAAKKGIEWAKEIFKNSPGLMISISDGNDIHFRKAKFDPIKCPPHCPRPCEKVCPTFAIDNFGIKESKCYGCGRCINSCPLNLISEYEYNLSKDDLASTLQKIKPDAVEIHTEINRIDAFAKVADILKSSETRLEKISISCGLNQSKEKSQDPEDLLKALWERYEILNDLNIPLIWQLDGRPMSGDLAPTTSKDAVKLFERIGSDLPPGLIQLAGGTNEKTHEFLKSNNLPDGIAFGSSARKIMQPLIEFAHKNNKKLYEDPERMAFAIKKAQKFLEPWKMSEF-
	8363	GC_00001486	HL Core	MIT9116	13943	ECG	167546.P9301_17511	4Fe-4S ferredoxin, iron-sulfur binding	G3DSA:3.30.70.20	G3DSA:3.30.70.20							R	R			COG1149	MinD superfamily P-loop ATPase, contains an inserted ferredoxin domain					PF12617	Iron-Sulfur binding protein C terminal	PS51379	4Fe-4S ferredoxin-type iron-sulfur binding domain profile.			SSF54862	SSF54862	PS00198	4Fe-4S ferredoxin-type iron-sulfur binding region signature.	-------MIKTKNKKDKWIKLICGASNEDIVAIEDLCAIYTAAGVDYIDVAAEESIVHAAKKGIEWAKEIFKNSPGLMISISDGNDIHFRKAKFDPIKCPPHCPRPCEKVCPTFAIDNFGIKESKCYGCGRCINSCPLNLISEYEYNLSKDDLASTLQKIKPDAVEIHTEINRIDAFAKVADILKSSETRLEKISISCGLNQSKEKSQDPEDLLKALWERYEILNDLNIPLIWQLDGRPMSGDLAPTTSKDAVKLFERIGSDLPPGLIQLAGGTNEKTHEFLKSNNLPDGIAFGSSARKIMQPLIEFAHKNNKKLYEDPERMAFAIKKAQKFLEPWKMSEF-
	8367	GC_00001486	HL Core	MIT9123	16001	ECG	167546.P9301_17511	4Fe-4S ferredoxin, iron-sulfur binding	G3DSA:3.30.70.20	G3DSA:3.30.70.20							R	R			COG1149	MinD superfamily P-loop ATPase, contains an inserted ferredoxin domain					PF12617	Iron-Sulfur binding protein C terminal	PS51379	4Fe-4S ferredoxin-type iron-sulfur binding domain profile.			SSF54862	SSF54862	PS00198	4Fe-4S ferredoxin-type iron-sulfur binding region signature.	-------MIKTKNKKDKWIKLICGASNEDIVAIEDLCAIYTAAGVDYIDVAAEESIVHAAKKGIEWAKEIFKNSPGLMISISDGNDIHFRKAKFDPIKCPPHCPRPCEKVCPTFAIDNFGIKESKCYGCGRCINSCPLNLISEYEYNLSKDDLASTLQKIKPDAVEIHTEINRIDAFAKVADILKSSETRLEKISISCGLNQSKEKSQDPEDLLKALWERYEILNDLNIPLIWQLDGRPMSGDLAPTTSKDAVKLFERIGSDLPPGLIQLAGGTNEKTHEFLKSNNLPDGIAFGSSARKIMQPLIEFAHKNNKKLYEDPERMAFAIKKAQKFLEPWKMSEF-
	8369	GC_00001486	HL Core	MIT9201	17668	ECG	74546.PMT9312_1652	4Fe-4S ferredoxin, iron-sulfur binding	G3DSA:3.30.70.20	G3DSA:3.30.70.20							R	R			COG1149	MinD superfamily P-loop ATPase, contains an inserted ferredoxin domain					PF12617	Iron-Sulfur binding protein C terminal	PS51379	4Fe-4S ferredoxin-type iron-sulfur binding domain profile.			SSF54862	SSF54862	PS00198	4Fe-4S ferredoxin-type iron-sulfur binding region signature.	-------MIKTKNKKDKWIKLICGASNEDILAIEDLCAIYTAAGVDYIDVAAEESIVHAAKKGIEWAKNVFKNSPGLMISISDGNDIHFRKAKFDPLKCPPNCPRPCEKVCPTFAIDSSGIKKSKCYGCGRCLNSCPLNLISEYEYNLSKDDLALTLQKIKPNAVEIHTEINRIDSFTKVVSILKSSRMRLDKISISCGLSHSLKKAQEPEDLLKALWERYEILNELNIPLIWQLDGRPMSGDLAPTTSKDAVKLFEKIGSDLPPGLIQLAGGTNDKTHEFLNSNNLPDGIAFGSAARKIMQPFIEFAHKNNKKLYEDPEKMALAIKKAQKFLEPWKSSSFK
	8374	GC_00001486	HL Core	MIT9202	19465	ECG	93060.P9215_18321	4Fe-4S ferredoxin, iron-sulfur binding	G3DSA:3.30.70.20	G3DSA:3.30.70.20							R	R			COG1149	MinD superfamily P-loop ATPase, contains an inserted ferredoxin domain					PF12617	Iron-Sulfur binding protein C terminal	PS51379	4Fe-4S ferredoxin-type iron-sulfur binding domain profile.			SSF54862	SSF54862	PS00198	4Fe-4S ferredoxin-type iron-sulfur binding region signature.	-------MIKTNNKKDKWIKLICGASNEDIVAIEDLCAIYTAAGVDYIDVAAEESIVHAAKKGIEWAKKVFKNSPGLMISISDGNDIHFRKAKFDPLKCPPNCSRPCEKVCPTFAIDNSGINKSKCYGCGRCLNSCPLNLISEYEYNLSKDGLASTLQKIKPNAVEIHTEINRLDSFTKVVNILKSSGTKLDKISISCGLNQSLKKSQEPEDLLKAFWERYEILIKLDIPLIWQLDGRPMSGDLAPTTSRDAVKLFEKIGSDLPPGLIQLAGGTNEKTHKFLNSNNLPDGIAFGSAARKIMQPLIEFAHKNNKKLYEDPERMALAIKKAQKLIEPWKSSSFK
	8376	GC_00001486	HL Core	MIT9215	24270	ECG	93060.P9215_18321	4Fe-4S ferredoxin, iron-sulfur binding	G3DSA:3.30.70.20	G3DSA:3.30.70.20							R	R			COG1149	MinD superfamily P-loop ATPase, contains an inserted ferredoxin domain					PF12617	Iron-Sulfur binding protein C terminal	PS51379	4Fe-4S ferredoxin-type iron-sulfur binding domain profile.			SSF54862	SSF54862	PS00198	4Fe-4S ferredoxin-type iron-sulfur binding region signature.	-------MIKTNNKKDKWIKLICGASNEDIVAIEDLCAIYTAAGVDYIDVAAEESIVHAAKKGIEWAKKVFKNSPGLMISISDGNDIHFRKAKFDPLKCPPNCSRPCEKVCPTFAIDNSGINKSKCYGCGRCLNSCPLNLISEYEYNLSKDGLASTLQKIKPNAVEIHTEINRLDSFTKVVNILKSSGTKLDKISISCGLNQSLKKSQEPEDLLKAFWERYEILIKLDIPLIWQLDGRPMSGDLAPTTSRDAVKLFEKIGSDLPPGLIQLAGGTNEKTHKFLNSNNLPDGIAFGSAARKIMQPLIEFAHKNNKKLYEDPERMALAIKKAQKLIEPWKSSSFK
	8375	GC_00001486	HL Core	MIT9301	26118	ECG	167546.P9301_17511	4Fe-4S ferredoxin, iron-sulfur binding	G3DSA:3.30.70.20	G3DSA:3.30.70.20							R	R			COG1149	MinD superfamily P-loop ATPase, contains an inserted ferredoxin domain					PF12617	Iron-Sulfur binding protein C terminal	PS51379	4Fe-4S ferredoxin-type iron-sulfur binding domain profile.			SSF54862	SSF54862	PS00198	4Fe-4S ferredoxin-type iron-sulfur binding region signature.	-------MIITKNKKDKWIKLICGASNEDIVAIEDLCAIYTAAGVDYIDVAAEESIVHAAKKGIEWAKKVFKNSPGLMISISDGNDIHFRKAKFDPLKCPPKCPRPCEKVCPTFAIDNSGIKKSKCYGCGRCLNSCPLNLISEYEYNLSKDDLGSTLQKIKPNAVEIHTEINRLDSFAKVVSIIKSSRKKLDKISISCGLNQSFKKSQEPEDLLKALWERYEILKKLDIPLIWQLDGRPMSGDLAPSTSRDAVELFEKIGSDLPPGLIQLAGGTNEKTHEFLNSNNLPDGIAFGSAARKIMQPLIEFAHKNNKKLYEYPERMALAIKKAKKFLEPWKSSSFK
	8373	GC_00001486	HL Core	MIT9302	26877	ECG	74546.PMT9312_1652	4Fe-4S ferredoxin, iron-sulfur binding	G3DSA:3.30.70.20	G3DSA:3.30.70.20							R	R			COG1149	MinD superfamily P-loop ATPase, contains an inserted ferredoxin domain					PF12617	Iron-Sulfur binding protein C terminal	PS51379	4Fe-4S ferredoxin-type iron-sulfur binding domain profile.			SSF54862	SSF54862	PS00198	4Fe-4S ferredoxin-type iron-sulfur binding region signature.	-------MNKTKKKKDKWIKLICGASNEDIVAIEDLCAIYTAAGVDYIDVAAEESIVHAAKKGIEWAKKIFKNSPGLMISISDGNDIHFRKAKFDPLRCPPNCSRPCEKVCPTFAIDNSGIKESKCYGCGRCINSCPLNLISEYEYNLSKYDLASTLKKTKPNAVEIHTEINRLDSFTKVVNILKSSEIKLDKISISCGLNQSFKKSHEPEDLLKALWKRYDILKELNIPLIWQLDGRPMSGDLAPTTSRDTVKLFEKIGSDLPPGLIQLAGGTNEKTHEFLNSNNLPDGIAFGSAARKIMQPLIEFAHKNNKRLYEYPERMALAIKKAQKFLEPWKSR---
	8379	GC_00001486	HL Core	MIT9311	31046	ECG	74546.PMT9312_1652	4Fe-4S ferredoxin, iron-sulfur binding	G3DSA:3.30.70.20	G3DSA:3.30.70.20							R	R			COG1149	MinD superfamily P-loop ATPase, contains an inserted ferredoxin domain					PF12617	Iron-Sulfur binding protein C terminal	PS51379	4Fe-4S ferredoxin-type iron-sulfur binding domain profile.			SSF54862	SSF54862	PS00198	4Fe-4S ferredoxin-type iron-sulfur binding region signature.	-------MTTTKNKKDKWIKLICGASNEDIVAIEDLCAIYTAAGVDYIDVAAEESIVHAAKKGIEWAKNVFKNSPGLMISISDGNDIHFRKAKFDSLKCPPNCPRPCEKVCPTFAIDNSGIKKSKCYGCGRCLNSCPLNLISEYEYNLSKDDLASTIQKIKPNAVEIHTAINRLNSFTKVVNILKSSEMKLDKISISCGLNQSFKKSQEPEDLLKALWERYEILKKLDIPLIWQLDGRPMSGDLAPITSRDAVKLFEKIGSDLPPGLIQLAGGTNEKTHEFLNSNNLPDGIAFGSAARKIMQPLIEFAHKNNKKIYEYPERMALAIKKAQKFLEPWKSSSFK
	8370	GC_00001486	HL Core	MIT9312	34609	ECG	74546.PMT9312_1652	4Fe-4S ferredoxin, iron-sulfur binding	G3DSA:3.30.70.20	G3DSA:3.30.70.20							R	R			COG1149	MinD superfamily P-loop ATPase, contains an inserted ferredoxin domain					PF12617	Iron-Sulfur binding protein C terminal	PS51379	4Fe-4S ferredoxin-type iron-sulfur binding domain profile.			SSF54862	SSF54862	PS00198	4Fe-4S ferredoxin-type iron-sulfur binding region signature.	-------MTTTKNKKDKWIKLICGASNEDIVAIEDLCAIYTAAGVDYIDVAAEESIVHAAKKGIEWAKNVFKNSPGLMISISDGNDIHFRKAKFDSLKCPPNCPRPCEKVCPTFAIDNSGIKKSKCYGCGRCLNSCPLNLISEYEYNLSKDDLASTIQKIKPNAVEIHTAINRLNSFTKVVNILKSSEMKLDKISISCGLNQSFKKSQEPEDLLKALWERYEILKKLDIPLIWQLDGRPMSGDLAPITSRDAVKLFEKIGSDLPPGLIQLAGGTNEKTHEFLNSNNLPDGIAFGSAARKIMQPLIEFAHKNNKKIYEYPERMALAIKKAQKFLEPWKSSSFK
	8362	GC_00001486	HL Core	MIT9314	38613	ECG	146891.A9601_17671	4Fe-4S ferredoxin, iron-sulfur binding	G3DSA:3.30.70.20	G3DSA:3.30.70.20							R	R			COG1149	MinD superfamily P-loop ATPase, contains an inserted ferredoxin domain					PF12617	Iron-Sulfur binding protein C terminal	PS51379	4Fe-4S ferredoxin-type iron-sulfur binding domain profile.			SSF54862	SSF54862	PS00198	4Fe-4S ferredoxin-type iron-sulfur binding region signature.	-------MIKIKNKKDKWIKLICGASNEDIVAIEDLCAIYTAAGVDYIDVAAEESIVYAAKKGIDWAKKVFKNSPGLMISISDGNDIHFRKAKFDPLKCPPSCPRPCEKVCPTFAIDNFGIKESKCYGCGRCLNSCPLNLISEYEYNLSKNDLASTLQTIRPNAVEIHTEINRLDSFTKVVSILKSSGMKLDKISISCGLNQSFKKAQEPEDLLKALWERYEILNELDIPLIWQLDGRPMSGDLAPTTSRDAVKLFEKIGSDLPPGLIQLAGGTNEKTHELLNSNNLPDGIAFGSAARKIMQPLIEFAHKNNKKLYEYPEKMSLAIKKAQKFLEPWKSS---
	8368	GC_00001486	HL Core	MIT9321	40500	ECG	167546.P9301_17511	4Fe-4S ferredoxin, iron-sulfur binding	G3DSA:3.30.70.20	G3DSA:3.30.70.20							R	R			COG1149	MinD superfamily P-loop ATPase, contains an inserted ferredoxin domain					PF12617	Iron-Sulfur binding protein C terminal	PS51379	4Fe-4S ferredoxin-type iron-sulfur binding domain profile.			SSF54862	SSF54862	PS00198	4Fe-4S ferredoxin-type iron-sulfur binding region signature.	-------MIKTKNKTDKWTKLICGASNEDIVAIEDLCAIYTAAGVDYIDVAAEESIVLSAKKGIKWAKKFFKNSPGLMISISDGNDIHFRKAKFDPLKCPSYCPRPCEKVCPTFAIDNSGITESKCYGCGRCLNSCPLNLISEYEYNLSKDDLASTLQKIKPNAVEIHTEINRLDSFTKVVSILKNAETKLDKISISCGLNQSAKKSQKPEDLLKALWERYEILNELNIPLIWQLDGRPMSGDLASTTSRDTVKLFERIGSDLPPGLIQLAGGTNEKTHKFLKSNNLPDGIAFGSAARKIMQPFIENAHKDNKRLYECPERMALAIKKAKKFLEPWKSR---
	8360	GC_00001486	HL Core	MIT9322	41387	ECG	167546.P9301_17511	4Fe-4S ferredoxin, iron-sulfur binding	G3DSA:3.30.70.20	G3DSA:3.30.70.20							R	R			COG1149	MinD superfamily P-loop ATPase, contains an inserted ferredoxin domain					PF12617	Iron-Sulfur binding protein C terminal	PS51379	4Fe-4S ferredoxin-type iron-sulfur binding domain profile.			SSF54862	SSF54862	PS00198	4Fe-4S ferredoxin-type iron-sulfur binding region signature.	-------MIKTKNKTDKWTKLICGASNEDIVAIEDLCAIYTAAGVDYIDVAAEESIVLSAKKGIKWAKKFFKNSPGLMISISDGNDIHFRKAKFDPLKCPSYCPRPCEKVCPTFAIDNSGITESKCYGCGRCLNSCPLNLISEYEYNLSKDDLASTLQKIKPNAVEIHTEINRLDSFTKVVSILKNAETKLDKISISCGLNQSAKKSQKPEDLLKALWERYEILNELNIPLIWQLDGRPMSGDLASTTSRDTVKLFERIGSDLPPGLIQLAGGTNEKTHKFLKSNNLPDGIAFGSAARKIMQPFIENAHKDNKRLYECPERMALAIKKAKKFLEPWKSR---
	8378	GC_00001486	HL Core	MIT9401	43414	ECG	167546.P9301_17511	4Fe-4S ferredoxin, iron-sulfur binding	G3DSA:3.30.70.20	G3DSA:3.30.70.20							R	R			COG1149	MinD superfamily P-loop ATPase, contains an inserted ferredoxin domain					PF12617	Iron-Sulfur binding protein C terminal	PS51379	4Fe-4S ferredoxin-type iron-sulfur binding domain profile.			SSF54862	SSF54862	PS00198	4Fe-4S ferredoxin-type iron-sulfur binding region signature.	-------MIKTKNKTDKWTKLICGASNEDIVAIEDLCAIYTAAGVDYIDVAAEESIVLSAKKGIKWAKKFFKNSPGLMISISDGNDIHFRKAKFDPLKCPSYCPRPCEKVCPTFAIDNSGITESKCYGCGRCLNSCPLNLISEYEYNLSKDDLASTLQKIKPNAVEIHTEINRLDSFTKVVSILKNAETKLDKISISCGLNQSAKKSQKPEDLLKALWERYEILNELNIPLIWQLDGRPMSGDLASTTSRDTVKLFERIGSDLPPGLIQLAGGTNEKTHKFLKSNNLPDGIAFGSAARKIMQPFIENAHKDNKRLYECPERMALAIKKAKKFLEPWKSR---
	8361	GC_00001486	HL Core	MIT9515	46610	ECG	167542.P9515_17421	4Fe-4S ferredoxin, iron-sulfur binding	G3DSA:3.30.70.20	G3DSA:3.30.70.20							C	C			COG1142	Fe-S-cluster-containing hydrogenase component 2					PF12617	Iron-Sulfur binding protein C terminal	PS51379	4Fe-4S ferredoxin-type iron-sulfur binding domain profile.			SSF54862	SSF54862	PS00198	4Fe-4S ferredoxin-type iron-sulfur binding region signature.	-------MKKNKKGSDKWVKLICGASNEDIVAIEDLCAIYSAAGVDYIDVAADQSIVQAARNGIEWAKEVCGASPGLMISISDGKDIHFRKAKFDPLKCPSDCPRPCERICPTFAIDYSGIKENKCYGCGRCISSCPLNLISEYEYNLSNNDLPYTLEKIKPDAVEIHTEINRLDSFIKVANILKSSGIKLEKISVSCGLNQSKK---GPKDLLKALWDRYEILSDHNVPLIWQLDGRPMSGDLAPATGKDTVKLWNNIGSRLPPGLIQLAGGTNEKTHEFLKINNFPDGIAFGSSARKIMQPLIEYANKNNKKLYEYPDQMALAIKKAQKLLNPWKTT---
	8372	GC_00001486	HL Core	SB	54208	ECG	167546.P9301_17511	4Fe-4S ferredoxin, iron-sulfur binding	G3DSA:3.30.70.20	G3DSA:3.30.70.20							R	R			COG1149	MinD superfamily P-loop ATPase, contains an inserted ferredoxin domain					PF12617	Iron-Sulfur binding protein C terminal	PS51379	4Fe-4S ferredoxin-type iron-sulfur binding domain profile.			SSF54862	SSF54862	PS00198	4Fe-4S ferredoxin-type iron-sulfur binding region signature.	-------MLTTKNKKDKWIKLICGASNEDIVAIEDLCAIYTAAGVDYIDVAAEESIVHAAKKGIEWAKKVFKNSPGLMISISDGNDIHFRKAKFDPLKCPPNCPRPCEKVCPTFAIDNSGIKKSKCYGCGRCLNSCPLNLISEYEYNLSKDDLGSTLQKIKPNAVEIHTEINRLDSFAKVVGILNNSGMKLDKISISCGLNSSFKKSQEPEDLLKALWERYEILKKLDIPLIWQLDGRPMSGDLAPSTSKDAVKLFEKIGSDLPPGLIQLAGGTNEKTHEFLNSNNLPDGIAFGSSARKIMQPLIEFAHKNNKKLYEYPERMALAIKKAKKFLEPWKSSSFK
	8681	GC_00001904		CCMP1375	3527	NA	167539.Pro1714	4Fe-4S ferredoxin, iron-sulfur binding	G3DSA:3.30.70.20	G3DSA:3.30.70.20							R	R			COG1149	MinD superfamily P-loop ATPase, contains an inserted ferredoxin domain					PF12617	Iron-Sulfur binding protein C terminal	PS51379	4Fe-4S ferredoxin-type iron-sulfur binding domain profile.			SSF54862	SSF54862	PS00198	4Fe-4S ferredoxin-type iron-sulfur binding region signature.	-MAIYALFYPINERLSFSLNESHYSNEISLRRGTWVKLICGASNDDLTSISDLCSVYAAAGVNCIDIAADIAVVAAAREGITWAKDNLGIKPWLMISLSDGKDIHFRKAYFNPKVCPKECSRPCEKVCPTNAINPTLGIIQDLCYGCGRCIPACPLELIQEKDNLLRIQDFGNLISKAKPDAIEIHTAPGRIKAFEQSVKEVVKSKVQLKRVAVSCGLEGHGITKDQLSQELWSRHECLCRYNQKPIWQLDGRPMSGDIGRGTAKAAILLLEKMHSIAPPGPIQLAGGTNEQTILHLQKNHRLAGIAFGGMARKLIQPFLIEAKAQNKKLIDWPEGWDKALKLAKGLIKPWLNNEYRMHY-
	8677	GC_00001904		LG	8973	NA	167539.Pro1714	4Fe-4S ferredoxin, iron-sulfur binding	G3DSA:3.30.70.20	G3DSA:3.30.70.20							R	R			COG1149	MinD superfamily P-loop ATPase, contains an inserted ferredoxin domain					PF12617	Iron-Sulfur binding protein C terminal	PS51379	4Fe-4S ferredoxin-type iron-sulfur binding domain profile.			SSF54862	SSF54862	PS00198	4Fe-4S ferredoxin-type iron-sulfur binding region signature.	-MAIYALFYPINERLSFSLNESHYSNEISLRRGTWVKLICGASNDDLTSISDLCSVYAAAGVNCIDIAADIAVVAAAREGITWAKDNLGIKPWLMISLSDGKDIHFRKAYFNPKVCPKECSRPCEKVCPTNAINPTLGIIQDLCYGCGRCIPACPLELIQEKDNLLRIQDFGNLISKAKPDAIEIHTAPGRIKAFEQSVKEVVKSKVQLKRVAVSCGLEGHGITKDQLSQELWSRHECLCRYNQKPIWQLDGRPMSGDIGRGTAKAAILLLEKMHSIAPPGPIQLAGGTNEQTILHLQKNHRLAGIAFGGMARKLIQPFLIEAKAQNKKLIDWPEGWDKALKLAKGLIKPWLNNEYRMHY-
	8673	GC_00001904		MIT9303	30303	ECG	167555.NATL1_20051	4Fe-4S ferredoxin, iron-sulfur binding	G3DSA:3.30.70.20	G3DSA:3.30.70.20							R	R			COG1149	MinD superfamily P-loop ATPase, contains an inserted ferredoxin domain					PF12617	Iron-Sulfur binding protein C terminal	PS51379	4Fe-4S ferredoxin-type iron-sulfur binding domain profile.			SSF54862	SSF54862	PS00198	4Fe-4S ferredoxin-type iron-sulfur binding region signature.	MAADVHFARGLNTIPSNPFQQSALRGELALASGSWVKLICGASNQDLLSITDLCAVFAAAGIHCVDVAADAAVVRAARQGLDWVQARSGFRPWLMVSISDGKDAHFRKAWFDPARCPSDCARPCQHACPAEAIGEQGGVQLSRCYGCGRCLPTCPLGLIDEHDRRLELRDFGPLLAELHPDAVEIHTAPGRAKAFESTVAELMSAQVPLQRIGVSCGLEGHGLTVEALASELWQRHVCLRRSGQRPLWQLDGRPMSGDIGSGTARVAVALWRKLRPLAPPGPLQLAGGTNAHTISYLSSDHGPAGIAFGGMARRLLQPWLLEAQARHVSLREWPEGWQAALAQAEQLVRPWL---FRQSGS
	8676	GC_00001904		MIT9313	36733	ECG	167555.NATL1_20051	4Fe-4S ferredoxin, iron-sulfur binding	G3DSA:3.30.70.20	G3DSA:3.30.70.20							R	R			COG1149	MinD superfamily P-loop ATPase, contains an inserted ferredoxin domain					PF12617	Iron-Sulfur binding protein C terminal	PS51379	4Fe-4S ferredoxin-type iron-sulfur binding domain profile.			SSF54862	SSF54862	PS00198	4Fe-4S ferredoxin-type iron-sulfur binding region signature.	MAADVHFARGLNTIPCHPFQQSALRGELALASGSWVKLICGASNQDLLAITDLCAVFAAAGIHCVDVAADAAVVRAARQGLDWVQARSGFRPWLMVSISDGKDAHFRKAWFDPARCPSDCSRPCQHSCPAEAIGEQGGVQLSRCYGCGRCLPTCPLGLIDEHDRRLELKDFGPLLAELHPDAVEIHTAPGRAEAFESTVAELMSAQVPLQRIGVSCGLEGHGLTVEALASELWQRYVCLRRSGQRPLWQLDGRPMSGDIGSGTARVAIALWRKLRPLAPPGPLQLAGGTNAHTITYLSSEHGPAGIAFGGMARRLLQPWLLEAQARHVSLREWPEGWQAALAQAEQLVRPWL---FRQSGS
	8680	GC_00001904		NATL1A	48616	ECG	167555.NATL1_20051	4Fe-4S ferredoxin, iron-sulfur binding	G3DSA:3.30.70.20	G3DSA:3.30.70.20							R	R			COG1149	MinD superfamily P-loop ATPase, contains an inserted ferredoxin domain					PF12617	Iron-Sulfur binding protein C terminal	PS51379	4Fe-4S ferredoxin-type iron-sulfur binding domain profile.			SSF54862	SSF54862	PS00198	4Fe-4S ferredoxin-type iron-sulfur binding region signature.	-----------------MINQNSTCNSEALKKGNWVKLICGASNQDLPSINDLCSIYGAAGVHCIDLAADEAVVHAARNAIDWVFETYGKKPWLMISLSDGKDSHFRKAWFNPDLCPSNCLRPCQNSCPAHAIENSGGVNAKKCYGCGRCIDTCPLGIIQEKDRRLTLRDFAPLLTTIKPDAVEIHTAPGRGKEFEKTIKEIFKADLQLKRLSVSCGLQGHGINHEQLAEELWLRHKFLRIHNQKPLWQIDGRRMSGDLGAGAAKIAVKLWERLRPIAPPGPLQLAGGTNESTIKYLPEIKGPEGIAFGGKARKIIQPWLEEAQRKGISLREWPEGWEAALSEAKRLINPWL---VRKSL-
[truncated: 59,537 more rows]

## Sheet: Connectivity gene clusters
	Gene_cluster	bin_name	ECG	NA	EAG	Sum ECG EAG	Percent EAG (excluding NA)			Average percent EAG (excluding NA)
	GC_00001017	HL Core	21	0	0	21	0		HL Core	12.366
[truncated: 7,384 more rows]

## Sheet: 3 disconnected core  GCs
	The three core gene clusters largely undetected in the environment:
[truncated: 101 more rows]
