# Supplementary material for: Linking pangenomes and metagenomes: the Prochlorococcus metapangenome
Source: PeerJ. 2018 Jan 25;6:e4320. doi: 10.7717/peerj.4320 (PMC5804319; doi:10.7717/peerj.4320)
Supplement: Table S4 — Summary of the pangenomic and metapangenomic analyses of Prochlorococcus isolates and SAGs. The table describes the pangenomic analysis of 31 Prochlorococcus isolate genomes and 74 Prochlorococcus single cell genomes (SAGs). The table also describes the metapangenome of five SAGs, which includes the functionality and environment connectivity of genes and links each gene to a gene cluster in the corresponding Prochlorococcus pangenome. [file peerj-06-4320-s007.xlsx]

## Sheet: SAGs statistics
Supplementary Table 4
	Main statistics of the single cell genomes by Kashtan et al. (2014)
	This table was generated using the anvi'o program 'anvi-script-get-collection-info'
	SAG	domain	domain_confidence	percent_completion	percent_redundancy	num_splits	total_length	Selected for the pangenomic analysis
	JFMZ01	bacteria	0.94	91.37	2.16	192	1625274	Yes
	JFLW01	bacteria	0.97	95.68	1.44	183	1620137	Yes
	JFLN01	bacteria	0.98	96.4	1.44	238	1606813	Yes
	JFLQ01	bacteria	0.96	94.24	1.44	224	1601052	Yes
	JFMR01	bacteria	0.97	94.96	2.16	222	1589855	Yes
	JFLE01	bacteria	0.88	83.45	5.04	217	1577546	Yes
	JFLX01	bacteria	0.99	97.84	1.44	192	1569355	Yes
	JFNX01	bacteria	0.96	93.53	2.88	261	1555095	Yes
	JFLJ01	bacteria	0.96	94.96	0.72	267	1531686	Yes
	JFLG01	bacteria	0.87	85.61	1.44	191	1530056	Yes
	JFLA01	bacteria	0.94	91.37	2.88	249	1517745	Yes
	JFOD01	bacteria	0.99	95.68	2.88	192	1516364	Yes
	JFLO01	bacteria	0.95	93.53	1.44	217	1511453	Yes
	JFNZ01	bacteria	0.89	84.89	4.32	372	1482919	Yes
	JFLM01	bacteria	0.95	92.09	2.88	337	1480309	Yes
	JFMO01	bacteria	0.88	86.33	1.44	323	1477228	Yes
	JFLB01	bacteria	0.95	89.21	5.76	355	1476938	Yes
	JFMM01	bacteria	0.94	92.81	1.44	236	1476136	Yes
	JFML01	bacteria	0.98	95.68	2.16	292	1472540	Yes
	JFNG01	bacteria	0.94	89.21	4.32	275	1469993	Yes
	JFLC01	bacteria	0.99	89.93	8.63	360	1464890	Yes
	JFLL01	bacteria	0.96	92.09	3.6	333	1464296	Yes
	JFMX01	bacteria	0.95	93.53	1.44	193	1460426	Yes
	JFMG01	bacteria	0.96	94.24	1.44	406	1453964	Yes
	JFNU01	bacteria	0.97	95.68	1.44	284	1453628	Yes
	JFLU01	bacteria	0.93	92.09	0.72	430	1452952	Yes
	JFLF01	bacteria	0.94	89.21	4.32	357	1448089	Yes
	JFMC01	bacteria	0.96	94.24	1.44	277	1439938	Yes
	JFLY01	bacteria	0.9	87.05	2.88	296	1434396	Yes
	JFMY01	bacteria	0.95	92.09	2.88	299	1432254	Yes
	JFNN01	bacteria	0.93	91.37	1.44	347	1431706	Yes
	JFNQ01	bacteria	0.96	90.65	5.04	497	1430675	Yes
	JFMV01	bacteria	0.91	89.93	0.72	174	1412289	Yes
	JFNK01	bacteria	0.95	93.53	1.44	456	1409853	Yes
	JFNF01	bacteria	0.87	84.17	2.88	366	1405162	Yes
	JFMJ01	bacteria	0.95	92.09	2.88	305	1401752	Yes
	JFMP01	bacteria	0.94	90.65	3.6	453	1398815	Yes
	JFNE01	bacteria	0.88	83.45	5.04	457	1382477	Yes
	JFLI01	bacteria	0.81	79.86	0.72	360	1378439	Yes
	JFME01	bacteria	0.96	93.53	2.16	333	1378315	Yes
	JFNA01	bacteria	0.91	88.49	2.88	307	1372698	Yes
	JFND01	bacteria	0.96	92.09	4.32	339	1368538	Yes
	JFNJ01	bacteria	0.88	83.45	4.32	349	1366174	Yes
	JFNT01	bacteria	0.95	91.37	3.6	280	1353699	Yes
	JFMT01	bacteria	0.81	77.7	2.88	412	1348564	Yes
	JFLP01	bacteria	0.88	87.05	1.44	242	1338231	Yes
	JFNC01	bacteria	0.96	94.24	1.44	425	1327384	Yes
	JFKQ01	bacteria	0.76	73.38	2.16	322	1318926	Yes
	JFNM01	bacteria	0.92	87.05	5.04	385	1310233	Yes
	JFLS01	bacteria	0.86	84.89	0.72	190	1305644	Yes
	JFNO01	bacteria	0.72	68.35	3.6	267	1284446	Yes
	JFKT01	bacteria	0.5	48.92	1.44	201	1271232	Yes
	JFNP01	bacteria	0.91	89.21	1.44	242	1264472	Yes
	JFMN01	bacteria	0.59	56.12	2.88	342	1236607	Yes
	JFLT01	bacteria	0.93	92.09	0.72	252	1227854	Yes
	JFNL01	bacteria	0.88	85.61	2.88	433	1218085	Yes
	JFMA01	bacteria	0.81	76.98	3.6	535	1192256	Yes
	JFKY01	bacteria	0.79	74.82	4.32	313	1190525	Yes
	JFLD01	bacteria	0.71	70.5	0.72	348	1183086	Yes
	JFKW01	bacteria	0.51	50.36	0.72	494	1170831	Yes
	JFNW01	bacteria	0.78	73.38	4.32	349	1160544	Yes
	JFNH01	bacteria	0.73	73.38	0	250	1149563	Yes
	JFKX01	bacteria	0.55	53.96	1.44	187	1148291	Yes
	JFLH01	bacteria	0.82	79.14	2.88	246	1144506	Yes
	JFOA01	bacteria	0.38	38.13	0	279	1142710	Yes
	JFNS01	bacteria	0.74	73.38	0.72	361	1136820	Yes
	JFKR01	bacteria	0.6	56.83	2.88	549	1133453	Yes
	JFKU01	bacteria	0.61	57.55	3.6	289	1108552	Yes
	JFKN01	bacteria	0.7	68.35	1.44	394	1107739	Yes
	JFLK01	bacteria	0.27	27.34	0	311	1104134	Yes
	JFMD01	bacteria	0.73	68.35	5.04	431	1097829	Yes
	JFMQ01	bacteria	0.76	72.66	3.6	343	1054292	Yes
	JFMI01	bacteria	0.77	75.54	1.44	167	1020798	Yes
	JFNR01	bacteria	0.62	59.71	2.16	309	1019838	Yes
	JFMB01	bacteria	0.63	61.15	1.44	289	986037	No
	JFMF01	bacteria	0.52	50.36	1.44	497	977410	No
	JFKZ01	bacteria	0.35	33.81	0.72	205	977191	No
	JFNY01	bacteria	0.64	56.83	7.19	454	966833	No
	JFLR01	bacteria	0.72	71.22	0.72	399	951023	No
	JFMU01	bacteria	0.35	34.53	0	183	949651	No
	JFKP01	bacteria	0.55	54.68	0.72	506	934681	No
	JFMW01	bacteria	0.53	50.36	2.88	458	907618	No
	JFLZ01	bacteria	0.58	55.4	2.88	374	901033	No
	JFOE01	bacteria	0.66	61.87	4.32	355	895440	No
	JFMS01	bacteria	0.63	63.31	0	355	860969	No
	JFOC01	bacteria	0.7	65.47	4.32	437	830606	No
	JFNI01	bacteria	0.27	27.34	0	116	698939	No
	JFMK01	bacteria	0.27	27.34	0	177	675744	No
	JFOB01	bacteria	0.29	28.78	0.72	445	621899	No
	JFKV01	bacteria	0.19	18.71	0	101	579043	No
	JFMH01	bacteria	0.41	38.13	2.88	164	552203	No
	JFKS01	bacteria	0.32	32.37	0	188	489145	No
	JFKO01	bacteria	0.42	39.57	2.88	240	469441	No
	JFNV01	bacteria	0.09	9.35	0	88	400975	No
	JFLV01	bacteria	0.41	38.85	2.16	231	370192	No

## Sheet: Cultivars and SAGs pangenomics
Supplementary Table 4
	Results from the pangenome combining 31 Prochlorococcus cultivar genomes and 74 Prochlorococcus SAGs
	Relevance: this pangenomic analysis revealed that gene clusters PC #33, PC #44 and PC #431 from the metapangenomic analysis of Prochlorococcus cultivars are also prevalent in Prochlorococcus SAGs.
	GCs of interest:
	GC_00000374	Udp-glucose 6-dehydrogenase
	GC_00000251	Mannose-1-phosphate guanylyltransferase
	GC_00000716	dTDP-D-glucose 4,6-dehydratase
	unique_id	Gene_cluster_id	genome_name	gene_callers_id			Row Labels	Source	GC_00000251	GC_00000374	GC_00000716
	154824	GC_00000001	AS9601	1186			AS9601	Isolate	1	1	1
	154825	GC_00000001	AS9601	1548			CCMP1375	Isolate	1	1	1
	154826	GC_00000001	AS9601	1549			EQPAC1	Isolate	1	1	1
	154827	GC_00000001	AS9601	1210			GP2	Isolate	1	1	1
	154828	GC_00000001	AS9601	404			LG	Isolate	1	1	1
	154829	GC_00000001	AS9601	1262			MED4	Isolate	1	1	1
	154830	GC_00000001	AS9601	1201			MIT9107	Isolate	1	1	1
	154831	GC_00000001	CCMP1375	3002			MIT9116	Isolate	1	1	1
	154832	GC_00000001	CCMP1375	3330			MIT9123	Isolate	1	1	1
	154833	GC_00000001	EQPAC1	3695			MIT9201	Isolate	1	1	1
	154834	GC_00000001	EQPAC1	4278			MIT9202	Isolate	1	1	1
	154835	GC_00000001	EQPAC1	4254			MIT9211	Isolate	1	1	1
	154836	GC_00000001	EQPAC1	4592			MIT9215	Isolate	1	1	1
	154837	GC_00000001	EQPAC1	5076			MIT9301	Isolate	1	1	1
	154838	GC_00000001	EQPAC1	4267			MIT9302	Isolate	1	1	1
	154839	GC_00000001	EQPAC1	4277			MIT9303	Isolate	1	1	1
	154840	GC_00000001	EQPAC1	4256			MIT9311	Isolate	1		1
	154841	GC_00000001	GP2	6594			MIT9312	Isolate	1		1
	154842	GC_00000001	GP2	7062			MIT9313	Isolate	1	1	1
	154843	GC_00000001	GP2	7063			MIT9314	Isolate	1	1	1
	154844	GC_00000001	GP2	6852			MIT9321	Isolate	1	1	1
	154845	GC_00000001	JFKN01	825			MIT9322	Isolate	1	1	1
	154846	GC_00000001	JFKN01	1118			MIT9401	Isolate	1	1	1
	154847	GC_00000001	JFKN01	1119			MIT9515	Isolate	1	1	1
	154848	GC_00000001	JFKN01	850			NATL1A	Isolate	1	1	1
	154849	GC_00000001	JFKQ01	1672			NATL2A	Isolate	1	1	1
	154850	GC_00000001	JFKQ01	1313			PAC1	Isolate	1	1	1
	154851	GC_00000001	JFKQ01	1665			SB	Isolate	1	1	1
	154852	GC_00000001	JFKQ01	1314			SS2	Isolate	1	1	1
	154853	GC_00000001	JFKQ01	1671			SS35	Isolate	1	1	1
	154854	GC_00000001	JFKQ01	1086			SS51	Isolate	1	1	1
	154855	GC_00000001	JFKQ01	1661			JFKN01	SAG	1		1
	154856	GC_00000001	JFKR01	1372			JFKQ01	SAG	1	1	1
	154857	GC_00000001	JFKR01	1599			JFKR01	SAG	1	1	1
	154858	GC_00000001	JFKR01	1600			JFKT01	SAG	1	1	1
	154859	GC_00000001	JFKR01	1373			JFKU01	SAG	1	1	1
	154860	GC_00000001	JFKT01	939			JFKW01	SAG	1	1	1
	154861	GC_00000001	JFKT01	1120			JFKX01	SAG		1
	154862	GC_00000001	JFKT01	945			JFKY01	SAG	1	1	1
	154863	GC_00000001	JFKT01	940			JFLA01	SAG	1	1	1
	154864	GC_00000001	JFKT01	1219			JFLB01	SAG	1	1	1
	154865	GC_00000001	JFKU01	829			JFLC01	SAG	1	1	1
	154866	GC_00000001	JFKU01	1104			JFLD01	SAG	1	1	1
	154867	GC_00000001	JFKU01	1103			JFLE01	SAG	1	1	1
	154868	GC_00000001	JFKU01	847			JFLF01	SAG	1		1
	154869	GC_00000001	JFKW01	945			JFLG01	SAG	1	1	1
	154870	GC_00000001	JFKW01	952			JFLH01	SAG		1	1
	154871	GC_00000001	JFKW01	946			JFLI01	SAG	1	1	1
	154872	GC_00000001	JFKW01	1081			JFLJ01	SAG	1	1	1
	154873	GC_00000001	JFKW01	956			JFLL01	SAG	1	1	1
	154874	GC_00000001	JFKX01	1085			JFLM01	SAG	1	1	1
	154875	GC_00000001	JFKX01	1121			JFLN01	SAG	1	1	1
	154876	GC_00000001	JFKX01	1086			JFLO01	SAG	1	1	1
	154877	GC_00000001	JFKX01	1120			JFLP01	SAG	1	1	1
	154878	GC_00000001	JFKY01	887			JFLQ01	SAG	1	1	1
	154879	GC_00000001	JFKY01	1485			JFLS01	SAG	1	1
	154880	GC_00000001	JFKY01	1484			JFLU01	SAG	1	1	1
	154881	GC_00000001	JFKY01	952			JFLW01	SAG	1	1	1
	154882	GC_00000001	JFLA01	1336			JFLX01	SAG	1	1	1
	154883	GC_00000001	JFLA01	1337			JFLY01	SAG	1	1	1
	154884	GC_00000001	JFLA01	1044			JFMA01	SAG	1	1	1
	154885	GC_00000001	JFLA01	1795			JFMC01	SAG	1	1	1
	154886	GC_00000001	JFLB01	1001			JFME01	SAG		1
	154887	GC_00000001	JFLB01	1192			JFMI01	SAG		1
	154888	GC_00000001	JFLB01	1008			JFMJ01	SAG	1	1	1
	154889	GC_00000001	JFLB01	1002			JFML01	SAG	1	1	1
	154890	GC_00000001	JFLB01	1265			JFMM01	SAG		1
	154891	GC_00000001	JFLB01	1012			JFMN01	SAG	1	1	1
	154892	GC_00000001	JFLC01	1010			JFMO01	SAG	1	1	1
	154893	GC_00000001	JFLC01	1198			JFMP01	SAG	1	1	1
	154894	GC_00000001	JFLC01	1479			JFMR01	SAG	1
	154895	GC_00000001	JFLC01	1017			JFMT01	SAG	1	1	1
	154896	GC_00000001	JFLC01	1480			JFMV01	SAG	1	1	1
	154897	GC_00000001	JFLC01	1011			JFMX01	SAG	1
	154898	GC_00000001	JFLC01	1254			JFMY01	SAG	1	1	1
	154899	GC_00000001	JFLC01	1022			JFMZ01	SAG	1		1
	154900	GC_00000001	JFLE01	1220			JFNA01	SAG	1	1	1
	154901	GC_00000001	JFLE01	1535			JFNC01	SAG	1	1	1
	154902	GC_00000001	JFLE01	1580			JFND01	SAG	1	1	1
	154903	GC_00000001	JFLE01	413			JFNE01	SAG	1	1
	154904	GC_00000001	JFLE01	1536			JFNF01	SAG	1	1	1
	154905	GC_00000001	JFLE01	1579			JFNG01	SAG	1	1	1
	154906	GC_00000001	JFLE01	1295			JFNH01	SAG	1		1
	154907	GC_00000001	JFLF01	1052			JFNJ01	SAG	1	1	1
	154908	GC_00000001	JFLF01	1230			JFNK01	SAG	1	1
	154909	GC_00000001	JFLF01	1059			JFNM01	SAG	1	1	1
	154910	GC_00000001	JFLF01	1053			JFNN01	SAG	1	1	1
	154911	GC_00000001	JFLF01	1284			JFNO01	SAG	1	1	1
	154912	GC_00000001	JFLG01	1177			JFNQ01	SAG	1	1	1
	154913	GC_00000001	JFLG01	1557			JFNR01	SAG	1	1	1
	154914	GC_00000001	JFLG01	1558			JFNS01	SAG	1		1
	154915	GC_00000001	JFLG01	1294			JFNT01	SAG	1	1
	154916	GC_00000001	JFLI01	1754			JFNU01	SAG		1	1
	154917	GC_00000001	JFLI01	1774			JFNX01	SAG	1	1	1
	154918	GC_00000001	JFLI01	1486			JFNZ01	SAG	1	1	1
	154919	GC_00000001	JFLI01	1755			JFOA01	SAG	1	1	1
	154920	GC_00000001	JFLI01	1218			JFOD01	SAG	1	1	1
	154921	GC_00000001	JFLI01	1771
	154922	GC_00000001	JFLJ01	1106				Sum SAGs	60	59	56
	154923	GC_00000001	JFLJ01	1468				% SAGs	81.0811	79.7297	75.6757
	154924	GC_00000001	JFLJ01	1
	154925	GC_00000001	JFLJ01	1818
	154926	GC_00000001	JFLJ01	1815
	154927	GC_00000001	JFLJ01	1230
	154928	GC_00000001	JFLK01	1221
	154929	GC_00000001	JFLK01	370
	154930	GC_00000001	JFLL01	1164
	154931	GC_00000001	JFLL01	1476
	154932	GC_00000001	JFLL01	1477
	154933	GC_00000001	JFLL01	1245
	154934	GC_00000001	JFLM01	1808
	154935	GC_00000001	JFLM01	1455
	154936	GC_00000001	JFLM01	1456
	154937	GC_00000001	JFLM01	1809
	154938	GC_00000001	JFLM01	1200
	154939	GC_00000001	JFLM01	403
	154940	GC_00000001	JFLN01	1110
	154941	GC_00000001	JFLN01	1300
	154942	GC_00000001	JFLN01	1617
	154943	GC_00000001	JFLN01	1117
	154944	GC_00000001	JFLN01	1618
	154945	GC_00000001	JFLN01	1111
	154946	GC_00000001	JFLN01	1371
	154947	GC_00000001	JFLN01	1122
	154948	GC_00000001	JFLO01	1134
	154949	GC_00000001	JFLO01	1448
	154950	GC_00000001	JFLO01	1449
	154951	GC_00000001	JFLO01	1195
	154952	GC_00000001	JFLP01	995
	154953	GC_00000001	JFLP01	1243
	154954	GC_00000001	JFLP01	1244
	154955	GC_00000001	JFLP01	1039
	154956	GC_00000001	JFLQ01	1235
	154957	GC_00000001	JFLQ01	1616
	154958	GC_00000001	JFLQ01	1283
	154959	GC_00000001	JFLS01	1190
	154960	GC_00000001	JFLS01	1191
	154961	GC_00000001	JFLS01	969
	154962	GC_00000001	JFLT01	1051
	154963	GC_00000001	JFLT01	1052
	154964	GC_00000001	JFLU01	1155
	154965	GC_00000001	JFLU01	1527
	154966	GC_00000001	JFLU01	1528
	154967	GC_00000001	JFLU01	1239
	154968	GC_00000001	JFLW01	1015
	154969	GC_00000001	JFLW01	1472
	154970	GC_00000001	JFLW01	1022
	154971	GC_00000001	JFLW01	1473
	154972	GC_00000001	JFLW01	1016
	154973	GC_00000001	JFLW01	1234
	154974	GC_00000001	JFLW01	1198
	154975	GC_00000001	JFLX01	1338
	154976	GC_00000001	JFLX01	1662
	154977	GC_00000001	JFLX01	1408
	154978	GC_00000001	JFLY01	1002
	154979	GC_00000001	JFLY01	1183
	154980	GC_00000001	JFLY01	1009
	154981	GC_00000001	JFLY01	1003
	154982	GC_00000001	JFLY01	1228
	154983	GC_00000001	JFMA01	1145
	154984	GC_00000001	JFMA01	1602
	154985	GC_00000001	JFMA01	956
	154986	GC_00000001	JFMA01	1601
	154987	GC_00000001	JFMA01	959
	154988	GC_00000001	JFMC01	1281
	154989	GC_00000001	JFMC01	1335
	154990	GC_00000001	JFMD01	991
	154991	GC_00000001	JFMD01	992
	154992	GC_00000001	JFME01	1378
	154993	GC_00000001	JFME01	1351
	154994	GC_00000001	JFME01	1352
	154995	GC_00000001	JFME01	1377
	154996	GC_00000001	JFME01	1093
	154997	GC_00000001	JFME01	1095
	154998	GC_00000001	JFMG01	990
	154999	GC_00000001	JFMG01	1455
	155000	GC_00000001	JFMG01	997
	155001	GC_00000001	JFMG01	1456
	155002	GC_00000001	JFMG01	991
	155003	GC_00000001	JFMG01	1221
	155004	GC_00000001	JFMI01	897
	155005	GC_00000001	JFMI01	898
	155006	GC_00000001	JFMJ01	1028
	155007	GC_00000001	JFMJ01	1089
	155008	GC_00000001	JFML01	1866
	155009	GC_00000001	JFML01	1851
	155010	GC_00000001	JFML01	1260
	155011	GC_00000001	JFML01	1542
	155012	GC_00000001	JFML01	1850
	155013	GC_00000001	JFML01	1306
	155014	GC_00000001	JFMM01	1524
	155015	GC_00000001	JFMM01	1496
	155016	GC_00000001	JFMM01	1775
	155017	GC_00000001	JFMM01	1497
	155018	GC_00000001	JFMM01	1523
	155019	GC_00000001	JFMM01	1223
	155020	GC_00000001	JFMN01	966
	155021	GC_00000001	JFMN01	1606
	155022	GC_00000001	JFMN01	1290
	155023	GC_00000001	JFMN01	1032
	155024	GC_00000001	JFMO01	1529
	155025	GC_00000001	JFMO01	1559
	155026	GC_00000001	JFMO01	1530
	155027	GC_00000001	JFMO01	1558
	155028	GC_00000001	JFMO01	1306
	155029	GC_00000001	JFMP01	1363
	155030	GC_00000001	JFMP01	1364
	155031	GC_00000001	JFMP01	1222
	155032	GC_00000001	JFMQ01	740
	155033	GC_00000001	JFMQ01	1033
	155034	GC_00000001	JFMQ01	1034
	155035	GC_00000001	JFMQ01	829
	155036	GC_00000001	JFMQ01	1397
	155037	GC_00000001	JFMQ01	827
	155038	GC_00000001	JFMR01	1071
	155039	GC_00000001	JFMR01	1553
	155040	GC_00000001	JFMR01	1250
	155041	GC_00000001	JFMR01	1077
	155042	GC_00000001	JFMR01	1554
	155043	GC_00000001	JFMR01	1072
	155044	GC_00000001	JFMR01	1319
	155045	GC_00000001	JFMT01	1000
	155046	GC_00000001	JFMT01	1494
	155047	GC_00000001	JFMT01	1007
	155048	GC_00000001	JFMT01	1495
	155049	GC_00000001	JFMT01	1001
	155050	GC_00000001	JFMT01	1224
	155051	GC_00000001	JFMV01	1288
	155052	GC_00000001	JFMX01	1048
	155053	GC_00000001	JFMX01	1139
	155054	GC_00000001	JFMX01	1403
	155055	GC_00000001	JFMX01	1054
	155056	GC_00000001	JFMX01	1404
	155057	GC_00000001	JFMX01	1049
	155058	GC_00000001	JFMX01	1193
	155059	GC_00000001	JFMX01	1058
	155060	GC_00000001	JFMY01	201
	155061	GC_00000001	JFMY01	164
	155062	GC_00000001	JFMY01	165
	155063	GC_00000001	JFMY01	200
	155064	GC_00000001	JFMY01	1649
	155065	GC_00000001	JFMZ01	1275
	155066	GC_00000001	JFMZ01	1595
	155067	GC_00000001	JFMZ01	1596
	155068	GC_00000001	JFMZ01	1280
	155069	GC_00000001	JFMZ01	1334
	155070	GC_00000001	JFNA01	1382
	155071	GC_00000001	JFNA01	1383
	155072	GC_00000001	JFNA01	1194
	155073	GC_00000001	JFNC01	1664
	155074	GC_00000001	JFND01	1379
	155075	GC_00000001	JFND01	1413
	155076	GC_00000001	JFND01	1118
	155077	GC_00000001	JFND01	1408
	155078	GC_00000001	JFND01	1380
	155079	GC_00000001	JFND01	1412
	155080	GC_00000001	JFND01	1187
	155081	GC_00000001	JFNF01	1187
	155082	GC_00000001	JFNF01	1514
	155083	GC_00000001	JFNF01	1481
	155084	GC_00000001	JFNF01	1482
	155085	GC_00000001	JFNF01	1513
	155086	GC_00000001	JFNG01	1265
	155087	GC_00000001	JFNG01	1259
	155088	GC_00000001	JFNG01	1264
	155089	GC_00000001	JFNG01	1486
	155090	GC_00000001	JFNG01	1256
	155091	GC_00000001	JFNH01	922
	155092	GC_00000001	JFNH01	826
	155093	GC_00000001	JFNH01	989
	155094	GC_00000001	JFNJ01	691
	155095	GC_00000001	JFNJ01	1358
	155096	GC_00000001	JFNJ01	1359
	155097	GC_00000001	JFNK01	1113
	155098	GC_00000001	JFNK01	1292
	155099	GC_00000001	JFNK01	1120
	155100	GC_00000001	JFNK01	1114
	155101	GC_00000001	JFNK01	1347
	155102	GC_00000001	JFNL01	1247
	155103	GC_00000001	JFNL01	1240
	155104	GC_00000001	JFNL01	1246
	155105	GC_00000001	JFNL01	1162
	155106	GC_00000001	JFNL01	1235
	155107	GC_00000001	JFNL01	1554
	155108	GC_00000001	JFNM01	1102
	155109	GC_00000001	JFNM01	1435
	155110	GC_00000001	JFNM01	1436
	155111	GC_00000001	JFNM01	1154
	155112	GC_00000001	JFNN01	915
	155113	GC_00000001	JFNN01	1102
	155114	GC_00000001	JFNN01	922
	155115	GC_00000001	JFNN01	916
	155116	GC_00000001	JFNN01	1164
	155117	GC_00000001	JFNO01	864
	155118	GC_00000001	JFNO01	1047
	155119	GC_00000001	JFNO01	871
	155120	GC_00000001	JFNO01	1076
	155121	GC_00000001	JFNO01	865
	155122	GC_00000001	JFNO01	875
	155123	GC_00000001	JFNP01	647
	155124	GC_00000001	JFNQ01	777
	155125	GC_00000001	JFNQ01	1907
	155126	GC_00000001	JFNQ01	783
	155127	GC_00000001	JFNQ01	1842
	155128	GC_00000001	JFNQ01	778
	155129	GC_00000001	JFNQ01	787
	155130	GC_00000001	JFNR01	615
	155131	GC_00000001	JFNR01	789
	155132	GC_00000001	JFNR01	622
	155133	GC_00000001	JFNR01	616
	155134	GC_00000001	JFNR01	627
	155135	GC_00000001	JFNS01	1517
	155136	GC_00000001	JFNT01	1319
	155137	GC_00000001	JFNT01	1318
	155138	GC_00000001	JFNU01	993
	155139	GC_00000001	JFNU01	1085
	155140	GC_00000001	JFNW01	1548
	155141	GC_00000001	JFNW01	1078
	155142	GC_00000001	JFNW01	1536
	155143	GC_00000001	JFNX01	1025
	155144	GC_00000001	JFNX01	1214
	155145	GC_00000001	JFNX01	1031
	155146	GC_00000001	JFNX01	1026
	155147	GC_00000001	JFNX01	1035
	155148	GC_00000001	JFNX01	1248
	155149	GC_00000001	JFNZ01	1507
	155150	GC_00000001	JFNZ01	1506
	155151	GC_00000001	JFNZ01	1269
	155152	GC_00000001	JFOA01	1089
	155153	GC_00000001	JFOA01	1130
	155154	GC_00000001	JFOD01	1194
	155155	GC_00000001	JFOD01	1435
	155156	GC_00000001	JFOD01	1793
	155157	GC_00000001	JFOD01	1786
	155158	GC_00000001	JFOD01	1436
	155159	GC_00000001	JFOD01	1792
	155160	GC_00000001	JFOD01	1249
	155161	GC_00000001	JFOD01	1782
	155162	GC_00000001	LG	7883
	155163	GC_00000001	LG	9169
	155164	GC_00000001	LG	9156
	155165	GC_00000001	MED4	10484
	155166	GC_00000001	MED4	10789
	155167	GC_00000001	MED4	10139
	155168	GC_00000001	MED4	10813
	155169	GC_00000001	MED4	10823
	155170	GC_00000001	MED4	9985
	155171	GC_00000001	MED4	10800
	155172	GC_00000001	MED4	10790
	155173	GC_00000001	MED4	10137
	155174	GC_00000001	MED4	10811
	155175	GC_00000001	MIT9107	11433
	155176	GC_00000001	MIT9107	12049
	155177	GC_00000001	MIT9107	11432
	155178	GC_00000001	MIT9107	11299
	155179	GC_00000001	MIT9107	11416
	155180	GC_00000001	MIT9116	13090
	155181	GC_00000001	MIT9116	14427
	155182	GC_00000001	MIT9116	13091
	155183	GC_00000001	MIT9116	13181
	155184	GC_00000001	MIT9116	14977
	155185	GC_00000001	MIT9123	15697
	155186	GC_00000001	MIT9123	16163
	155187	GC_00000001	MIT9123	15696
	155188	GC_00000001	MIT9123	15932
	155189	GC_00000001	MIT9123	15680
	155190	GC_00000001	MIT9201	17274
	155191	GC_00000001	MIT9201	18272
	155192	GC_00000001	MIT9201	17273
	155193	GC_00000001	MIT9201	17236
	155194	GC_00000001	MIT9201	18803
	155195	GC_00000001	MIT9201	18804
	155196	GC_00000001	MIT9202	18929
	155197	GC_00000001	MIT9202	19271
	155198	GC_00000001	MIT9202	19272
	155199	GC_00000001	MIT9202	18946
	155200	GC_00000001	MIT9202	18993
	155201	GC_00000001	MIT9202	19289
	155202	GC_00000001	MIT9211	22152
	155203	GC_00000001	MIT9215	23696
	155204	GC_00000001	MIT9215	24065
	155205	GC_00000001	MIT9215	24066
	155206	GC_00000001	MIT9215	23776
	155207	GC_00000001	MIT9215	23729
	155208	GC_00000001	MIT9215	24084
	155209	GC_00000001	MIT9301	25607
	155210	GC_00000001	MIT9301	25952
	155211	GC_00000001	MIT9301	25953
	155212	GC_00000001	MIT9301	25694
	155213	GC_00000001	MIT9302	27931
	155214	GC_00000001	MIT9302	28056
	155215	GC_00000001	MIT9302	27971
	155216	GC_00000001	MIT9302	27932
	155217	GC_00000001	MIT9302	27222
	155218	GC_00000001	MIT9302	27656
	155219	GC_00000001	MIT9302	27267
	155220	GC_00000001	MIT9303	29028
	155221	GC_00000001	MIT9303	29246
	155222	GC_00000001	MIT9303	29030
	155223	GC_00000001	MIT9303	29248
	155224	GC_00000001	MIT9311	31228
	155225	GC_00000001	MIT9311	31385
	155226	GC_00000001	MIT9311	31430
	155227	GC_00000001	MIT9311	32694
	155228	GC_00000001	MIT9311	32695
	155229	GC_00000001	MIT9311	31815
	155230	GC_00000001	MIT9311	31899
	155231	GC_00000001	MIT9311	31885
	155232	GC_00000001	MIT9311	31386
	155233	GC_00000001	MIT9311	31428
	155234	GC_00000001	MIT9312	34035
	155235	GC_00000001	MIT9312	34421
	155236	GC_00000001	MIT9312	34466
	155237	GC_00000001	MIT9312	33561
	155238	GC_00000001	MIT9312	33560
	155239	GC_00000001	MIT9312	34053
	155240	GC_00000001	MIT9312	34168
	155241	GC_00000001	MIT9312	34154
	155242	GC_00000001	MIT9312	34422
	155243	GC_00000001	MIT9312	34464
	155244	GC_00000001	MIT9313	36090
	155245	GC_00000001	MIT9313	35901
	155246	GC_00000001	MIT9313	36089
	155247	GC_00000001	MIT9313	36088
	155248	GC_00000001	MIT9313	35899
	155249	GC_00000001	MIT9314	37574
	155250	GC_00000001	MIT9314	38886
	155251	GC_00000001	MIT9314	38885
	155252	GC_00000001	MIT9314	37809
	155253	GC_00000001	MIT9314	39187
	155254	GC_00000001	MIT9314	37806
	155255	GC_00000001	MIT9321	39250
	155256	GC_00000001	MIT9321	40802
	155257	GC_00000001	MIT9321	40801
	155258	GC_00000001	MIT9321	41077
	155259	GC_00000001	MIT9321	40774
	155260	GC_00000001	MIT9321	40773
	155261	GC_00000001	MIT9322	41798
	155262	GC_00000001	MIT9322	42023
	155263	GC_00000001	MIT9322	42022
	155264	GC_00000001	MIT9322	42289
	155265	GC_00000001	MIT9322	41995
	155266	GC_00000001	MIT9322	41994
	155267	GC_00000001	MIT9401	43015
	155268	GC_00000001	MIT9401	43272
	155269	GC_00000001	MIT9401	43271
	155270	GC_00000001	MIT9401	44135
	155271	GC_00000001	MIT9401	43244
	155272	GC_00000001	MIT9401	43243
	155273	GC_00000001	MIT9515	45786
	155274	GC_00000001	MIT9515	46097
	155275	GC_00000001	MIT9515	46440
	155276	GC_00000001	MIT9515	46618
	155277	GC_00000001	MIT9515	46441
	155278	GC_00000001	MIT9515	45784
	155279	GC_00000001	MIT9515	46616
	155280	GC_00000001	MIT9515	46461
	155281	GC_00000001	NATL1A	47842
	155282	GC_00000001	NATL1A	48035
	155283	GC_00000001	NATL1A	48424
	155284	GC_00000001	NATL1A	47861
	155285	GC_00000001	NATL1A	46874
	155286	GC_00000001	NATL1A	48006
	155287	GC_00000001	NATL1A	47184
	155288	GC_00000001	NATL1A	47840
	155289	GC_00000001	NATL1A	48069
	155290	GC_00000001	NATL1A	48423
	155291	GC_00000001	NATL1A	48036
	155292	GC_00000001	NATL1A	47949
	155293	GC_00000001	NATL1A	47183
	155294	GC_00000001	NATL1A	47841
	155295	GC_00000001	NATL1A	48012
	155296	GC_00000001	NATL2A	50017
	155297	GC_00000001	NATL2A	50397
	155298	GC_00000001	NATL2A	49842
	155299	GC_00000001	NATL2A	48888
	155300	GC_00000001	NATL2A	49987
	155301	GC_00000001	NATL2A	50396
	155302	GC_00000001	NATL2A	49201
	155303	GC_00000001	NATL2A	49822
	155304	GC_00000001	NATL2A	50053
	155305	GC_00000001	NATL2A	49933
	155306	GC_00000001	NATL2A	49200
	155307	GC_00000001	NATL2A	49823
	155308	GC_00000001	NATL2A	49992
	155309	GC_00000001	NATL2A	50019
	155310	GC_00000001	PAC1	51549
	155311	GC_00000001	PAC1	51375
	155312	GC_00000001	PAC1	52825
	155313	GC_00000001	PAC1	50886
	155314	GC_00000001	PAC1	51366
	155315	GC_00000001	PAC1	51288
	155316	GC_00000001	PAC1	51548
	155317	GC_00000001	PAC1	50885
	155318	GC_00000001	PAC1	52823
	155319	GC_00000001	PAC1	52824
	155320	GC_00000001	SB	53362
	155321	GC_00000001	SB	54368
	155322	GC_00000001	SB	54367
	155323	GC_00000001	SB	54620
	155324	GC_00000001	SB	54622
	155325	GC_00000001	SB	54693
	155326	GC_00000001	SS2	55757
	155327	GC_00000001	SS2	56208
	155328	GC_00000001	SS2	55691
	155329	GC_00000001	SS35	57281
	155330	GC_00000001	SS35	57379
	155331	GC_00000001	SS51	59825
	155332	GC_00000001	SS51	59867
	155333	GC_00000001	SS51	59880
	105548	GC_00000002	AS9601	612
	105549	GC_00000002	AS9601	1783
	105550	GC_00000002	AS9601	1442
	105551	GC_00000002	CCMP1375	2423
	105552	GC_00000002	CCMP1375	3602
	105553	GC_00000002	CCMP1375	3182
	105554	GC_00000002	EQPAC1	5204
	105555	GC_00000002	EQPAC1	4826
	105556	GC_00000002	EQPAC1	4393
	105557	GC_00000002	GP2	5655
	105558	GC_00000002	GP2	7291
	105559	GC_00000002	GP2	6960
	105560	GC_00000002	JFKN01	342
	105561	GC_00000002	JFKN01	1360
	105562	GC_00000002	JFKN01	1010
	105563	GC_00000002	JFKQ01	513
	105564	GC_00000002	JFKQ01	1545
	105565	GC_00000002	JFKQ01	1207
	105566	GC_00000002	JFKR01	524
	105567	GC_00000002	JFKR01	1532
	105568	GC_00000002	JFKR01	1265
	105569	GC_00000002	JFKT01	516
	105570	GC_00000002	JFKU01	404
	105571	GC_00000002	JFKU01	1280
	105572	GC_00000002	JFKU01	1007
	105573	GC_00000002	JFKW01	488
	105574	GC_00000002	JFKW01	1549
	105575	GC_00000002	JFKW01	434
	105576	GC_00000002	JFKW01	1550
	105577	GC_00000002	JFKW01	1548
	105578	GC_00000002	JFKW01	1224
	105579	GC_00000002	JFKX01	513
	105580	GC_00000002	JFKX01	1273
	105581	GC_00000002	JFKX01	982
	105582	GC_00000002	JFKY01	523
	105583	GC_00000002	JFKY01	1373
	105584	GC_00000002	JFLA01	486
	105585	GC_00000002	JFLA01	1584
	105586	GC_00000002	JFLA01	1220
	105587	GC_00000002	JFLB01	534
	105588	GC_00000002	JFLB01	1599
	105589	GC_00000002	JFLC01	571
	105590	GC_00000002	JFLC01	1775
	105591	GC_00000002	JFLC01	1373
	105592	GC_00000002	JFLD01	598
	105593	GC_00000002	JFLD01	1429
	105594	GC_00000002	JFLE01	1766
	105595	GC_00000002	JFLE01	1430
	105596	GC_00000002	JFLF01	586
	105597	GC_00000002	JFLF01	1415
	105598	GC_00000002	JFLG01	689
	105599	GC_00000002	JFLG01	2
	105600	GC_00000002	JFLG01	1451
	105601	GC_00000002	JFLH01	491
	105602	GC_00000002	JFLH01	1326
	105603	GC_00000002	JFLH01	1082
	105604	GC_00000002	JFLH01	1083
	105605	GC_00000002	JFLI01	572
	105606	GC_00000002	JFLI01	1684
	105607	GC_00000002	JFLJ01	500
	105608	GC_00000002	JFLJ01	1679
	105609	GC_00000002	JFLJ01	1357
	105610	GC_00000002	JFLK01	579
	105611	GC_00000002	JFLL01	608
	105612	GC_00000002	JFLL01	1842
	105613	GC_00000002	JFLL01	1736
	105614	GC_00000002	JFLL01	1400
	105615	GC_00000002	JFLM01	615
	105616	GC_00000002	JFLM01	1713
	105617	GC_00000002	JFLM01	1348
	105618	GC_00000002	JFLN01	661
	105619	GC_00000002	JFLN01	1862
	105620	GC_00000002	JFLN01	1512
	105621	GC_00000002	JFLO01	600
	105622	GC_00000002	JFLO01	1704
	105623	GC_00000002	JFLO01	1341
	105624	GC_00000002	JFLP01	559
	105625	GC_00000002	JFLP01	1470
	105626	GC_00000002	JFLP01	1138
	105627	GC_00000002	JFLQ01	623
	105628	GC_00000002	JFLQ01	1848
	105629	GC_00000002	JFLQ01	1472
	105630	GC_00000002	JFLS01	572
	105631	GC_00000002	JFLS01	1443
	105632	GC_00000002	JFLS01	1444
	105633	GC_00000002	JFLS01	1441
	105634	GC_00000002	JFLS01	1442
	105635	GC_00000002	JFLS01	1079
	105636	GC_00000002	JFLT01	1292
	105637	GC_00000002	JFLT01	947
	105638	GC_00000002	JFLU01	637
	105639	GC_00000002	JFLU01	1742
	105640	GC_00000002	JFLU01	1421
	105641	GC_00000002	JFLW01	589
	105642	GC_00000002	JFLW01	1739
	105643	GC_00000002	JFLW01	1368
	105644	GC_00000002	JFLX01	775
	105645	GC_00000002	JFLX01	104
	105646	GC_00000002	JFLX01	1552
	105647	GC_00000002	JFLY01	511
	105648	GC_00000002	JFLY01	1382
	105649	GC_00000002	JFMA01	622
	105650	GC_00000002	JFMA01	1497
	105651	GC_00000002	JFMA01	1260
	105652	GC_00000002	JFMC01	749
	105653	GC_00000002	JFMC01	41
	105654	GC_00000002	JFMC01	1448
	105655	GC_00000002	JFMD01	469
	105656	GC_00000002	JFMD01	1257
	105657	GC_00000002	JFMD01	900
	105658	GC_00000002	JFME01	468
	105659	GC_00000002	JFME01	359
	105660	GC_00000002	JFME01	1597
	105661	GC_00000002	JFME01	1238
	105662	GC_00000002	JFMG01	595
	105663	GC_00000002	JFMG01	1711
	105664	GC_00000002	JFMG01	1339
	105665	GC_00000002	JFMI01	1144
	105666	GC_00000002	JFMI01	793
	105667	GC_00000002	JFMJ01	438
	105668	GC_00000002	JFMJ01	1577
	105669	GC_00000002	JFMJ01	1578
	105670	GC_00000002	JFMJ01	1576
	105671	GC_00000002	JFMJ01	1243
	105672	GC_00000002	JFML01	1784
	105673	GC_00000002	JFML01	1440
	105674	GC_00000002	JFMM01	592
	105675	GC_00000002	JFMM01	1727
	105676	GC_00000002	JFMM01	1377
	105677	GC_00000002	JFMM01	1376
	105678	GC_00000002	JFMN01	421
	105679	GC_00000002	JFMN01	422
	105680	GC_00000002	JFMN01	1493
	105681	GC_00000002	JFMN01	1186
	105682	GC_00000002	JFMO01	650
	105683	GC_00000002	JFMO01	1748
	105684	GC_00000002	JFMO01	1419
	105685	GC_00000002	JFMP01	548
	105686	GC_00000002	JFMP01	549
	105687	GC_00000002	JFMP01	1601
	105688	GC_00000002	JFMP01	1799
	105689	GC_00000002	JFMQ01	1244
	105690	GC_00000002	JFMQ01	1245
	105691	GC_00000002	JFMR01	579
	105692	GC_00000002	JFMR01	1780
	105693	GC_00000002	JFMR01	1436
	105694	GC_00000002	JFMT01	554
	105695	GC_00000002	JFMT01	1380
	105696	GC_00000002	JFMV01	606
	105697	GC_00000002	JFMV01	1574
	105698	GC_00000002	JFMX01	606
	105699	GC_00000002	JFMX01	1655
	105700	GC_00000002	JFMX01	1297
	105701	GC_00000002	JFMY01	1027
	105702	GC_00000002	JFMY01	406
	105703	GC_00000002	JFMY01	89
	105704	GC_00000002	JFMZ01	664
	105705	GC_00000002	JFMZ01	1864
	105706	GC_00000002	JFMZ01	1489
	105707	GC_00000002	JFNA01	584
	105708	GC_00000002	JFNA01	1599
	105709	GC_00000002	JFNC01	475
	105710	GC_00000002	JFNC01	1560
	105711	GC_00000002	JFNC01	1239
	105712	GC_00000002	JFND01	659
	105713	GC_00000002	JFND01	1620
	105714	GC_00000002	JFND01	1263
	105715	GC_00000002	JFNE01	569
	105716	GC_00000002	JFNE01	1663
	105717	GC_00000002	JFNE01	1305
	105718	GC_00000002	JFNF01	538
	105719	GC_00000002	JFNF01	1381
	105720	GC_00000002	JFNF01	1707
	105721	GC_00000002	JFNG01	52
	105722	GC_00000002	JFNH01	403
	105723	GC_00000002	JFNH01	1323
	105724	GC_00000002	JFNJ01	551
	105725	GC_00000002	JFNJ01	1615
	105726	GC_00000002	JFNJ01	1253
	105727	GC_00000002	JFNK01	1787
	105728	GC_00000002	JFNK01	1475
	105729	GC_00000002	JFNL01	529
	105730	GC_00000002	JFNL01	530
	105731	GC_00000002	JFNL01	1452
	105732	GC_00000002	JFNM01	629
	105733	GC_00000002	JFNM01	1679
	105734	GC_00000002	JFNM01	1319
	105735	GC_00000002	JFNN01	436
	105736	GC_00000002	JFNN01	1622
	105737	GC_00000002	JFNN01	1317
	105738	GC_00000002	JFNN01	1316
	105739	GC_00000002	JFNO01	399
	105740	GC_00000002	JFNO01	1426
	105741	GC_00000002	JFNO01	1223
	105742	GC_00000002	JFNP01	532
	105743	GC_00000002	JFNP01	1412
	105744	GC_00000002	JFNP01	1061
	105745	GC_00000002	JFNQ01	323
	105746	GC_00000002	JFNQ01	1541
	105747	GC_00000002	JFNQ01	825
	105748	GC_00000002	JFNQ01	458
	105749	GC_00000002	JFNR01	481
	105750	GC_00000002	JFNR01	1232
	105751	GC_00000002	JFNR01	923
	105752	GC_00000002	JFNS01	525
	105753	GC_00000002	JFNS01	1274
	105754	GC_00000002	JFNS01	1182
	105755	GC_00000002	JFNT01	580
	105756	GC_00000002	JFNT01	1525
	105757	GC_00000002	JFNT01	1232
	105758	GC_00000002	JFNU01	452
	105759	GC_00000002	JFNU01	1550
	105760	GC_00000002	JFNU01	1213
	105761	GC_00000002	JFNW01	459
	105762	GC_00000002	JFNW01	1151
	105763	GC_00000002	JFNW01	1435
	105764	GC_00000002	JFNX01	559
	105765	GC_00000002	JFNX01	1759
	105766	GC_00000002	JFNX01	1399
	105767	GC_00000002	JFNZ01	599
	105768	GC_00000002	JFNZ01	1715
	105769	GC_00000002	JFNZ01	1407
	105770	GC_00000002	JFOA01	431
	105771	GC_00000002	JFOA01	1339
	105772	GC_00000002	JFOD01	549
	105773	GC_00000002	JFOD01	1678
	105774	GC_00000002	LG	8487
	105775	GC_00000002	LG	8897
	105776	GC_00000002	LG	7535
	105777	GC_00000002	MED4	9858
	105778	GC_00000002	MED4	11055
	105779	GC_00000002	MED4	10675
	105780	GC_00000002	MIT9107	11877
	105781	GC_00000002	MIT9107	11189
	105782	GC_00000002	MIT9107	11537
	105783	GC_00000002	MIT9116	14028
	105784	GC_00000002	MIT9116	13825
	105785	GC_00000002	MIT9116	13363
	105786	GC_00000002	MIT9123	16408
	105787	GC_00000002	MIT9123	15628
	105788	GC_00000002	MIT9123	15801
	105789	GC_00000002	MIT9201	18253
	105790	GC_00000002	MIT9201	18455
	105791	GC_00000002	MIT9201	17379
	105792	GC_00000002	MIT9202	20257
	105793	GC_00000002	MIT9202	19535
	105794	GC_00000002	MIT9202	19166
	105795	GC_00000002	MIT9211	21294
	105796	GC_00000002	MIT9211	22383
	105797	GC_00000002	MIT9211	21991
	105798	GC_00000002	MIT9215	23116
	105799	GC_00000002	MIT9215	24340
	105800	GC_00000002	MIT9215	23962
	105801	GC_00000002	MIT9301	25008
	105802	GC_00000002	MIT9301	26188
	105803	GC_00000002	MIT9301	25848
	105804	GC_00000002	MIT9302	27467
	105805	GC_00000002	MIT9302	26948
	105806	GC_00000002	MIT9302	27826
	105807	GC_00000002	MIT9303	29866
	105808	GC_00000002	MIT9303	28392
	105809	GC_00000002	MIT9303	29131
	105810	GC_00000002	MIT9303	29994
	105811	GC_00000002	MIT9311	31103
	105812	GC_00000002	MIT9311	30975
	105813	GC_00000002	MIT9311	31281
	105814	GC_00000002	MIT9312	33446
	105815	GC_00000002	MIT9312	34680
	105816	GC_00000002	MIT9312	34317
	105817	GC_00000002	MIT9313	35272
	105818	GC_00000002	MIT9313	34899
	105819	GC_00000002	MIT9313	36000
	105820	GC_00000002	MIT9313	35154
	105821	GC_00000002	MIT9314	37408
	105822	GC_00000002	MIT9314	38683
	105823	GC_00000002	MIT9314	38993
	105824	GC_00000002	MIT9321	40343
	105825	GC_00000002	MIT9321	40571
	105826	GC_00000002	MIT9321	40904
	105827	GC_00000002	MIT9322	42780
	105828	GC_00000002	MIT9322	41316
	105829	GC_00000002	MIT9322	42126
	105830	GC_00000002	MIT9401	44642
	105831	GC_00000002	MIT9401	43758
	105832	GC_00000002	MIT9401	43691
	105833	GC_00000002	MIT9515	45537
	105834	GC_00000002	MIT9515	46686
	105835	GC_00000002	MIT9515	46325
	105836	GC_00000002	NATL1A	47369
	105837	GC_00000002	NATL1A	48691
	105838	GC_00000002	NATL1A	48339
	105839	GC_00000002	NATL2A	49389
	105840	GC_00000002	NATL2A	50672
	105841	GC_00000002	NATL2A	50312
	105842	GC_00000002	PAC1	52386
	105843	GC_00000002	PAC1	50975
	105844	GC_00000002	PAC1	51464
	105845	GC_00000002	SB	53451
	105846	GC_00000002	SB	54138
	105847	GC_00000002	SB	54473
	105848	GC_00000002	SS2	55174
	105849	GC_00000002	SS2	55419
	105850	GC_00000002	SS2	54991
	105851	GC_00000002	SS35	58359
	105852	GC_00000002	SS35	57006
	105853	GC_00000002	SS35	56708
	105854	GC_00000002	SS51	58710
	105855	GC_00000002	SS51	60135
	105856	GC_00000002	SS51	58939
	26010	GC_00000003	AS9601	1467
	26011	GC_00000003	AS9601	1807
	26012	GC_00000003	AS9601	776
	26013	GC_00000003	CCMP1375	3207
	26014	GC_00000003	CCMP1375	3627
	26015	GC_00000003	CCMP1375	2747
	26016	GC_00000003	EQPAC1	4367
	26017	GC_00000003	EQPAC1	4852
	26018	GC_00000003	EQPAC1	5005
	26019	GC_00000003	GP2	6985
	26020	GC_00000003	GP2	7316
	26021	GC_00000003	GP2	6308
	26022	GC_00000003	JFKN01	1039
	26023	GC_00000003	JFKN01	1395
	26024	GC_00000003	JFKN01	1394
	26025	GC_00000003	JFKQ01	1232
	26026	GC_00000003	JFKQ01	1574
	26027	GC_00000003	JFKQ01	717
	26028	GC_00000003	JFKR01	1291
	26029	GC_00000003	JFKR01	669
	26030	GC_00000003	JFKR01	670
	26031	GC_00000003	JFKT01	1373
	26032	GC_00000003	JFKT01	1483
	26033	GC_00000003	JFKT01	689
	26034	GC_00000003	JFKU01	1032
	26035	GC_00000003	JFKU01	1304
	26036	GC_00000003	JFKW01	1249
	26037	GC_00000003	JFKW01	666
	26038	GC_00000003	JFKX01	1009
	26039	GC_00000003	JFKX01	1298
	26040	GC_00000003	JFKX01	716
	26041	GC_00000003	JFLA01	1246
	26042	GC_00000003	JFLA01	1609
	26043	GC_00000003	JFLA01	650
	26044	GC_00000003	JFLB01	1623
	26045	GC_00000003	JFLB01	745
	26046	GC_00000003	JFLC01	1398
	26047	GC_00000003	JFLC01	753
	26048	GC_00000003	JFLD01	1454
	26049	GC_00000003	JFLD01	778
	26050	GC_00000003	JFLE01	1455
	26051	GC_00000003	JFLE01	1791
	26052	GC_00000003	JFLE01	800
	26053	GC_00000003	JFLF01	1440
	26054	GC_00000003	JFLF01	766
	26055	GC_00000003	JFLG01	1476
	26056	GC_00000003	JFLG01	27
	26057	GC_00000003	JFLH01	1350
	26058	GC_00000003	JFLH01	637
	26059	GC_00000003	JFLI01	1406
	26060	GC_00000003	JFLI01	771
	26061	GC_00000003	JFLI01	1708
	26062	GC_00000003	JFLJ01	1383
	26063	GC_00000003	JFLJ01	708
	26064	GC_00000003	JFLJ01	1707
	26065	GC_00000003	JFLK01	1421
	26066	GC_00000003	JFLK01	805
	26067	GC_00000003	JFLL01	1760
	26068	GC_00000003	JFLL01	797
	26069	GC_00000003	JFLM01	1376
	26070	GC_00000003	JFLM01	1747
	26071	GC_00000003	JFLM01	831
	26072	GC_00000003	JFLN01	1537
	26073	GC_00000003	JFLN01	1887
	26074	GC_00000003	JFLN01	852
	26075	GC_00000003	JFLO01	1366
	26076	GC_00000003	JFLO01	1730
	26077	GC_00000003	JFLO01	781
	26078	GC_00000003	JFLP01	1163
	26079	GC_00000003	JFLP01	1499
	26080	GC_00000003	JFLP01	758
	26081	GC_00000003	JFLQ01	1509
	26082	GC_00000003	JFLQ01	1872
	26083	GC_00000003	JFLQ01	805
	26084	GC_00000003	JFLS01	1109
	26085	GC_00000003	JFLS01	1467
	26086	GC_00000003	JFLT01	972
	26087	GC_00000003	JFLT01	1316
	26088	GC_00000003	JFLU01	1446
	26089	GC_00000003	JFLU01	1767
	26090	GC_00000003	JFLU01	760
	26091	GC_00000003	JFLW01	1393
	26092	GC_00000003	JFLW01	1763
	26093	GC_00000003	JFLW01	784
	26094	GC_00000003	JFLX01	1580
	26095	GC_00000003	JFLX01	128
	26096	GC_00000003	JFLX01	907
	26097	GC_00000003	JFLX01	906
	26098	GC_00000003	JFLY01	1414
	26099	GC_00000003	JFLY01	1677
	26100	GC_00000003	JFLY01	729
	26101	GC_00000003	JFMA01	1520
	26102	GC_00000003	JFMA01	831
	26103	GC_00000003	JFMC01	1485
	26104	GC_00000003	JFMC01	65
	26105	GC_00000003	JFMD01	1281
	26106	GC_00000003	JFMD01	621
	26107	GC_00000003	JFME01	1272
	26108	GC_00000003	JFME01	1622
	26109	GC_00000003	JFME01	641
	26110	GC_00000003	JFMG01	1375
	26111	GC_00000003	JFMG01	1735
	26112	GC_00000003	JFMI01	818
	26113	GC_00000003	JFMI01	1168
	26114	GC_00000003	JFMI01	513
	26115	GC_00000003	JFMJ01	1268
	26116	GC_00000003	JFMJ01	1619
	26117	GC_00000003	JFMJ01	618
	26118	GC_00000003	JFML01	1465
	26119	GC_00000003	JFML01	1808
	26120	GC_00000003	JFML01	786
	26121	GC_00000003	JFML01	787
	26122	GC_00000003	JFMM01	1415
	26123	GC_00000003	JFMM01	778
	26124	GC_00000003	JFMN01	1209
	26125	GC_00000003	JFMN01	1522
	26126	GC_00000003	JFMO01	1444
	26127	GC_00000003	JFMO01	1773
	26128	GC_00000003	JFMO01	830
	26129	GC_00000003	JFMP01	1824
	26130	GC_00000003	JFMP01	1625
	26131	GC_00000003	JFMP01	760
	26132	GC_00000003	JFMP01	1288
	26133	GC_00000003	JFMQ01	952
	26134	GC_00000003	JFMQ01	1278
	26135	GC_00000003	JFMQ01	342
	26136	GC_00000003	JFMQ01	953
	26137	GC_00000003	JFMR01	1815
	26138	GC_00000003	JFMR01	823
	26139	GC_00000003	JFMR01	1464
	26140	GC_00000003	JFMT01	1414
	26141	GC_00000003	JFMV01	1598
	26142	GC_00000003	JFMV01	788
	26143	GC_00000003	JFMV01	789
	26144	GC_00000003	JFMX01	1323
	26145	GC_00000003	JFMX01	1682
	26146	GC_00000003	JFMX01	808
	26147	GC_00000003	JFMY01	430
	26148	GC_00000003	JFMY01	1580
	26149	GC_00000003	JFMZ01	1514
	26150	GC_00000003	JFMZ01	1890
	26151	GC_00000003	JFMZ01	843
	26152	GC_00000003	JFNA01	1301
	26153	GC_00000003	JFNA01	1625
	26154	GC_00000003	JFNA01	781
	26155	GC_00000003	JFNC01	1264
	26156	GC_00000003	JFNC01	1589
	26157	GC_00000003	JFNC01	674
	26158	GC_00000003	JFND01	1300
	26159	GC_00000003	JFND01	1
	26160	GC_00000003	JFNE01	1335
	26161	GC_00000003	JFNE01	747
	26162	GC_00000003	JFNE01	1708
	26163	GC_00000003	JFNE01	1709
	26164	GC_00000003	JFNF01	1401
	26165	GC_00000003	JFNF01	1731
	26166	GC_00000003	JFNF01	778
	26167	GC_00000003	JFNG01	1645
	26168	GC_00000003	JFNG01	82
	26169	GC_00000003	JFNG01	1205
	26170	GC_00000003	JFNH01	572
	26171	GC_00000003	JFNH01	1355
	26172	GC_00000003	JFNJ01	1278
	26173	GC_00000003	JFNJ01	1059
	26174	GC_00000003	JFNK01	1513
	26175	GC_00000003	JFNK01	1812
	26176	GC_00000003	JFNK01	853
	26177	GC_00000003	JFNL01	1477
	26178	GC_00000003	JFNL01	752
	26179	GC_00000003	JFNM01	1703
	26180	GC_00000003	JFNM01	749
	26181	GC_00000003	JFNM01	1342
	26182	GC_00000003	JFNN01	1653
	26183	GC_00000003	JFNN01	650
	26184	GC_00000003	JFNN01	1360
	26185	GC_00000003	JFNO01	1451
	26186	GC_00000003	JFNO01	608
	26187	GC_00000003	JFNP01	1095
	26188	GC_00000003	JFNP01	1436
	26189	GC_00000003	JFNP01	962
	26190	GC_00000003	JFNQ01	1016
	26191	GC_00000003	JFNQ01	1891
	26192	GC_00000003	JFNQ01	654
	26193	GC_00000003	JFNR01	949
	26194	GC_00000003	JFNR01	1257
	26195	GC_00000003	JFNS01	1298
	26196	GC_00000003	JFNS01	1193
	26197	GC_00000003	JFNS01	690
	26198	GC_00000003	JFNS01	689
	26199	GC_00000003	JFNT01	1257
	26200	GC_00000003	JFNT01	1549
	26201	GC_00000003	JFNU01	1238
	26202	GC_00000003	JFNU01	1576
	26203	GC_00000003	JFNW01	1159
	26204	GC_00000003	JFNW01	641
	26205	GC_00000003	JFNW01	1447
	26206	GC_00000003	JFNX01	1424
	26207	GC_00000003	JFNX01	1790
	26208	GC_00000003	JFNX01	783
	26209	GC_00000003	JFNZ01	1433
	26210	GC_00000003	JFNZ01	1744
	26211	GC_00000003	JFNZ01	819
	26212	GC_00000003	JFOA01	1363
	26213	GC_00000003	JFOA01	627
	26214	GC_00000003	JFOD01	1702
	26215	GC_00000003	JFOD01	766
	26216	GC_00000003	LG	7560
	26217	GC_00000003	LG	8872
	26218	GC_00000003	LG	8058
	26219	GC_00000003	MED4	10701
	26220	GC_00000003	MED4	11081
	26221	GC_00000003	MED4	10055
	26222	GC_00000003	MIT9107	11512
	26223	GC_00000003	MIT9107	11213
	26224	GC_00000003	MIT9107	12584
	26225	GC_00000003	MIT9116	13388
	26226	GC_00000003	MIT9116	13754
	26227	GC_00000003	MIT9116	13715
	26228	GC_00000003	MIT9123	15776
	26229	GC_00000003	MIT9123	15652
	26230	GC_00000003	MIT9123	16621
	26231	GC_00000003	MIT9201	17353
	26232	GC_00000003	MIT9201	18431
	26233	GC_00000003	MIT9201	17980
	26234	GC_00000003	MIT9202	19192
	26235	GC_00000003	MIT9202	19561
	26236	GC_00000003	MIT9202	20442
	26237	GC_00000003	MIT9211	22017
	26238	GC_00000003	MIT9211	22408
	26239	GC_00000003	MIT9211	21525
	26240	GC_00000003	MIT9215	23987
	26241	GC_00000003	MIT9215	24366
	26242	GC_00000003	MIT9215	23291
	26243	GC_00000003	MIT9301	25873
	26244	GC_00000003	MIT9301	26212
	26245	GC_00000003	MIT9301	25201
	26246	GC_00000003	MIT9302	27852
	26247	GC_00000003	MIT9302	26972
	26248	GC_00000003	MIT9302	26648
	26249	GC_00000003	MIT9303	30031
	26250	GC_00000003	MIT9303	28297
	26251	GC_00000003	MIT9303	29622
	26252	GC_00000003	MIT9311	31307
	26253	GC_00000003	MIT9311	30950
	26254	GC_00000003	MIT9311	32618
	26255	GC_00000003	MIT9312	34343
	26256	GC_00000003	MIT9312	34705
	26257	GC_00000003	MIT9312	33637
	26258	GC_00000003	MIT9313	35121
	26259	GC_00000003	MIT9313	34831
	26260	GC_00000003	MIT9313	35513
	26261	GC_00000003	MIT9314	38968
	26262	GC_00000003	MIT9314	38708
	26263	GC_00000003	MIT9314	37696
	26264	GC_00000003	MIT9321	40879
	26265	GC_00000003	MIT9321	40596
	26266	GC_00000003	MIT9321	39570
	26267	GC_00000003	MIT9322	42101
	26268	GC_00000003	MIT9322	41291
	26269	GC_00000003	MIT9322	42597
	26270	GC_00000003	MIT9401	43666
	26271	GC_00000003	MIT9401	43783
	26272	GC_00000003	MIT9401	44459
	26273	GC_00000003	MIT9515	46350
	26274	GC_00000003	MIT9515	46714
	26275	GC_00000003	MIT9515	45734
	26276	GC_00000003	NATL1A	48363
	26277	GC_00000003	NATL1A	48732
	26278	GC_00000003	NATL1A	47692
	26279	GC_00000003	NATL2A	50336
	26280	GC_00000003	NATL2A	50720
	26281	GC_00000003	NATL2A	49677
	26282	GC_00000003	PAC1	51488
	26283	GC_00000003	PAC1	51710
	26284	GC_00000003	PAC1	52674
	26285	GC_00000003	SB	54448
	26286	GC_00000003	SB	54112
	26287	GC_00000003	SB	52949
	26288	GC_00000003	SS2	54966
	26289	GC_00000003	SS2	55774
	26290	GC_00000003	SS2	55953
	26291	GC_00000003	SS35	56733
	26292	GC_00000003	SS35	56981
	26293	GC_00000003	SS35	57635
	26294	GC_00000003	SS51	58964
	26295	GC_00000003	SS51	60160
	26296	GC_00000003	SS51	59570
	37320	GC_00000004	AS9601	30
	37321	GC_00000004	AS9601	1030
	37322	GC_00000004	CCMP1375	1899
	37323	GC_00000004	EQPAC1	4075
	37324	GC_00000004	EQPAC1	4591
	37325	GC_00000004	EQPAC1	3855
	37326	GC_00000004	GP2	5766
	37327	GC_00000004	GP2	6557
	37328	GC_00000004	JFKN01	31
	37329	GC_00000004	JFKN01	145
	37330	GC_00000004	JFKQ01	32
	37331	GC_00000004	JFKQ01	1352
	37332	GC_00000004	JFKQ01	943
	37333	GC_00000004	JFKR01	33
	37334	GC_00000004	JFKR01	324
	37335	GC_00000004	JFKR01	933
	37336	GC_00000004	JFKT01	17
	37337	GC_00000004	JFKT01	961
	37338	GC_00000004	JFKU01	33
	37339	GC_00000004	JFKU01	251
	37340	GC_00000004	JFKW01	1348
	37341	GC_00000004	JFKW01	974
	37342	GC_00000004	JFKX01	342
	37343	GC_00000004	JFKX01	16
	37344	GC_00000004	JFKX01	15
	37345	GC_00000004	JFKY01	35
	37346	GC_00000004	JFLA01	1701
	37347	GC_00000004	JFLB01	1716
	37348	GC_00000004	JFLB01	1385
	37349	GC_00000004	JFLB01	1031
	37350	GC_00000004	JFLC01	31
	37351	GC_00000004	JFLC01	1516
	37352	GC_00000004	JFLC01	1040
	37353	GC_00000004	JFLD01	45
	37354	GC_00000004	JFLD01	429
	37355	GC_00000004	JFLD01	1047
	37356	GC_00000004	JFLE01	40
	37357	GC_00000004	JFLE01	412
	37358	GC_00000004	JFLE01	748
	37359	GC_00000004	JFLE01	1061
	37360	GC_00000004	JFLF01	36
	37361	GC_00000004	JFLF01	1900
	37362	GC_00000004	JFLF01	1071
	37363	GC_00000004	JFLG01	119
	37364	GC_00000004	JFLG01	1184
	37365	GC_00000004	JFLG01	1019
	37366	GC_00000004	JFLH01	1444
	37367	GC_00000004	JFLI01	62
	37368	GC_00000004	JFLI01	1034
	37369	GC_00000004	JFLJ01	1796
	37370	GC_00000004	JFLJ01	1880
	37371	GC_00000004	JFLJ01	948
	37372	GC_00000004	JFLK01	35
	37373	GC_00000004	JFLK01	726
	37374	GC_00000004	JFLK01	1061
	37375	GC_00000004	JFLL01	21
	37376	GC_00000004	JFLL01	400
	37377	GC_00000004	JFLM01	34
	37378	GC_00000004	JFLM01	397
	37379	GC_00000004	JFLN01	36
	37380	GC_00000004	JFLN01	1650
	37381	GC_00000004	JFLN01	1140
	37382	GC_00000004	JFLO01	22
	37383	GC_00000004	JFLO01	393
	37384	GC_00000004	JFLP01	1577
	37385	GC_00000004	JFLQ01	33
	37386	GC_00000004	JFLQ01	392
	37387	GC_00000004	JFLQ01	1073
	37388	GC_00000004	JFLS01	31
	37389	GC_00000004	JFLT01	1408
	37390	GC_00000004	JFLT01	274
	37391	GC_00000004	JFLT01	740
	37392	GC_00000004	JFLU01	9
	37393	GC_00000004	JFLW01	20
	37394	GC_00000004	JFLW01	1511
	37395	GC_00000004	JFLW01	1042
	37396	GC_00000004	JFLX01	220
	37397	GC_00000004	JFLX01	1821
	37398	GC_00000004	JFLX01	1172
	37399	GC_00000004	JFLY01	17
	37400	GC_00000004	JFLY01	1030
	37401	GC_00000004	JFLY01	1768
	37402	GC_00000004	JFLY01	1754
	37403	GC_00000004	JFMA01	26
	37404	GC_00000004	JFMA01	415
	37405	GC_00000004	JFMA01	978
	37406	GC_00000004	JFMC01	158
	37407	GC_00000004	JFMC01	533
	37408	GC_00000004	JFMC01	1124
	37409	GC_00000004	JFMD01	20
	37410	GC_00000004	JFMD01	865
	37411	GC_00000004	JFME01	39
	37412	GC_00000004	JFME01	888
	37413	GC_00000004	JFME01	1729
	37414	GC_00000004	JFME01	1718
	37415	GC_00000004	JFMG01	28
	37416	GC_00000004	JFMG01	1495
	37417	GC_00000004	JFMG01	1014
	37418	GC_00000004	JFMI01	40
	37419	GC_00000004	JFMI01	929
	37420	GC_00000004	JFMJ01	1715
	37421	GC_00000004	JFMJ01	223
	37422	GC_00000004	JFMJ01	869
	37423	GC_00000004	JFML01	58
	37424	GC_00000004	JFML01	435
	37425	GC_00000004	JFML01	1053
	37426	GC_00000004	JFMM01	72
	37427	GC_00000004	JFMM01	392
	37428	GC_00000004	JFMM01	1028
	37429	GC_00000004	JFMN01	1590
	37430	GC_00000004	JFMN01	803
	37431	GC_00000004	JFMO01	20
	37432	GC_00000004	JFMO01	433
	37433	GC_00000004	JFMO01	1082
	37434	GC_00000004	JFMP01	18
	37435	GC_00000004	JFMP01	688
	37436	GC_00000004	JFMP01	1019
	37437	GC_00000004	JFMQ01	21
	37438	GC_00000004	JFMQ01	1400
	37439	GC_00000004	JFMQ01	602
	37440	GC_00000004	JFMR01	742
	37441	GC_00000004	JFMR01	1094
	37442	GC_00000004	JFMR01	48
	37443	GC_00000004	JFMT01	30
	37444	GC_00000004	JFMT01	1526
	37445	GC_00000004	JFMT01	1025
	37446	GC_00000004	JFMV01	34
	37447	GC_00000004	JFMV01	400
	37448	GC_00000004	JFMV01	1052
	37449	GC_00000004	JFMX01	62
	37450	GC_00000004	JFMX01	1438
	37451	GC_00000004	JFMX01	1076
	37452	GC_00000004	JFMY01	523
	37453	GC_00000004	JFMY01	902
	37454	GC_00000004	JFMY01	1310
	37455	GC_00000004	JFMZ01	37
	37456	GC_00000004	JFMZ01	411
	37457	GC_00000004	JFMZ01	1115
	37458	GC_00000004	JFNA01	19
	37459	GC_00000004	JFNA01	392
	37460	GC_00000004	JFNA01	1040
	37461	GC_00000004	JFNC01	17
	37462	GC_00000004	JFNC01	1349
	37463	GC_00000004	JFND01	92
	37464	GC_00000004	JFND01	962
	37465	GC_00000004	JFNE01	22
	37466	GC_00000004	JFNE01	1136
	37467	GC_00000004	JFNE01	945
	37468	GC_00000004	JFNF01	340
	37469	GC_00000004	JFNF01	1028
	37470	GC_00000004	JFNG01	174
	37471	GC_00000004	JFNG01	921
	37472	GC_00000004	JFNG01	1276
	37473	GC_00000004	JFNH01	36
	37474	GC_00000004	JFNH01	843
	37475	GC_00000004	JFNH01	1424
	37476	GC_00000004	JFNH01	1458
	37477	GC_00000004	JFNJ01	32
	37478	GC_00000004	JFNJ01	1391
	37479	GC_00000004	JFNJ01	854
	37480	GC_00000004	JFNK01	50
	37481	GC_00000004	JFNK01	1130
	37482	GC_00000004	JFNL01	17
	37483	GC_00000004	JFNL01	1580
	37484	GC_00000004	JFNM01	35
	37485	GC_00000004	JFNM01	408
	37486	GC_00000004	JFNN01	17
	37487	GC_00000004	JFNN01	1769
	37488	GC_00000004	JFNN01	941
	37489	GC_00000004	JFNO01	17
	37490	GC_00000004	JFNO01	892
	37491	GC_00000004	JFNP01	23
	37492	GC_00000004	JFNP01	752
	37493	GC_00000004	JFNQ01	1731
	37494	GC_00000004	JFNQ01	1145
	37495	GC_00000004	JFNQ01	85
	37496	GC_00000004	JFNR01	1054
	37497	GC_00000004	JFNR01	646
	37498	GC_00000004	JFNS01	1390
	37499	GC_00000004	JFNS01	957
	37500	GC_00000004	JFNT01	17
	37501	GC_00000004	JFNT01	353
	37502	GC_00000004	JFNU01	1668
	37503	GC_00000004	JFNU01	1766
	37504	GC_00000004	JFNU01	834
	37505	GC_00000004	JFNW01	17
	37506	GC_00000004	JFNW01	1230
	37507	GC_00000004	JFNW01	894
	37508	GC_00000004	JFNX01	20
	37509	GC_00000004	JFNX01	1053
	37510	GC_00000004	JFNZ01	17
	37511	GC_00000004	JFNZ01	1070
	37512	GC_00000004	JFOA01	35
	37513	GC_00000004	JFOA01	931
	37514	GC_00000004	JFOD01	17
	37515	GC_00000004	JFOD01	1829
	37516	GC_00000004	JFOD01	1030
	37517	GC_00000004	LG	8284
	37518	GC_00000004	MED4	9282
	37519	GC_00000004	MED4	10822
	37520	GC_00000004	MED4	10324
	37521	GC_00000004	MIT9107	13006
	37522	GC_00000004	MIT9107	12350
	37523	GC_00000004	MIT9116	14274
	37524	GC_00000004	MIT9116	14657
	37525	GC_00000004	MIT9123	14987
	37526	GC_00000004	MIT9123	16854
	37527	GC_00000004	MIT9201	18776
	37528	GC_00000004	MIT9201	17848
	37529	GC_00000004	MIT9202	19653
	37530	GC_00000004	MIT9202	20692
	37531	GC_00000004	MIT9211	20768
	37532	GC_00000004	MIT9215	22506
	37533	GC_00000004	MIT9215	23540
	37534	GC_00000004	MIT9301	24458
	37535	GC_00000004	MIT9301	25451
	37536	GC_00000004	MIT9302	26369
	37537	GC_00000004	MIT9302	27564
	37538	GC_00000004	MIT9302	26490
	37539	GC_00000004	MIT9303	28267
	37540	GC_00000004	MIT9311	32318
	37541	GC_00000004	MIT9311	32371
	37542	GC_00000004	MIT9312	32896
	37543	GC_00000004	MIT9312	33882
	37544	GC_00000004	MIT9313	34804
	37545	GC_00000004	MIT9314	37598
	37546	GC_00000004	MIT9314	37770
	37547	GC_00000004	MIT9314	38509
	37548	GC_00000004	MIT9321	40688
	37549	GC_00000004	MIT9321	39819
	37550	GC_00000004	MIT9322	41504
	37551	GC_00000004	MIT9322	41202
	37552	GC_00000004	MIT9401	44775
	37553	GC_00000004	MIT9401	44210
	37554	GC_00000004	MIT9515	44935
	37555	GC_00000004	MIT9515	45946
	37556	GC_00000004	NATL1A	46806
	37557	GC_00000004	NATL2A	48835
	37558	GC_00000004	PAC1	51826
	37559	GC_00000004	SB	54020
	37560	GC_00000004	SB	53200
	37561	GC_00000004	SS2	54833
	37562	GC_00000004	SS35	57835
	37563	GC_00000004	SS51	59167
	60922	GC_00000005	AS9601	1551
	60923	GC_00000005	AS9601	1261
	60924	GC_00000005	AS9601	405
	60925	GC_00000005	CCMP1375	3003
	60926	GC_00000005	EQPAC1	4559
	60927	GC_00000005	EQPAC1	4255
	60928	GC_00000005	GP2	6854
	60929	GC_00000005	GP2	7065
	60930	GC_00000005	GP2	7074
	60931	GC_00000005	GP2	6853
	60932	GC_00000005	JFKN01	848
	60933	GC_00000005	JFKN01	1120
	60934	GC_00000005	JFKN01	849
	60935	GC_00000005	JFKQ01	1315
	60936	GC_00000005	JFKQ01	1085
	60937	GC_00000005	JFKR01	1141
	60938	GC_00000005	JFKR01	1375
	60939	GC_00000005	JFKT01	948
	60940	GC_00000005	JFKT01	1218
	60941	GC_00000005	JFKU01	846
	60942	GC_00000005	JFKU01	845
	60943	GC_00000005	JFKW01	1079
	60944	GC_00000005	JFKW01	1080
	60945	GC_00000005	JFKX01	1087
	60946	GC_00000005	JFKY01	950
	60947	GC_00000005	JFKY01	951
	60948	GC_00000005	JFLA01	1338
	60949	GC_00000005	JFLA01	1043
	60950	GC_00000005	JFLB01	1263
	60951	GC_00000005	JFLB01	1264
	60952	GC_00000005	JFLC01	1481
	60953	GC_00000005	JFLC01	1253
	60954	GC_00000005	JFLE01	1567
	60955	GC_00000005	JFLE01	1537
	60956	GC_00000005	JFLE01	1294
	60957	GC_00000005	JFLF01	1283
	60958	GC_00000005	JFLG01	1292
	60959	GC_00000005	JFLG01	1559
	60960	GC_00000005	JFLG01	1293
	60961	GC_00000005	JFLI01	1216
	60962	GC_00000005	JFLI01	1488
	60963	GC_00000005	JFLI01	1217
	60964	GC_00000005	JFLJ01	1816
	60965	GC_00000005	JFLJ01	1229
	60966	GC_00000005	JFLK01	371
	60967	GC_00000005	JFLL01	1243
	60968	GC_00000005	JFLL01	1479
	60969	GC_00000005	JFLL01	1244
	60970	GC_00000005	JFLM01	1198
	60971	GC_00000005	JFLM01	1457
	60972	GC_00000005	JFLM01	1199
	60973	GC_00000005	JFLM01	404
	60974	GC_00000005	JFLN01	1619
	60975	GC_00000005	JFLN01	1370
	60976	GC_00000005	JFLO01	1193
	60977	GC_00000005	JFLO01	1450
	60978	GC_00000005	JFLO01	1194
	60979	GC_00000005	JFLP01	1245
	60980	GC_00000005	JFLP01	1038
	60981	GC_00000005	JFLQ01	1281
	60982	GC_00000005	JFLQ01	1575
	60983	GC_00000005	JFLQ01	1282
	60984	GC_00000005	JFLQ01	1617
	60985	GC_00000005	JFLS01	967
	60986	GC_00000005	JFLS01	1192
	60987	GC_00000005	JFLS01	968
	60988	GC_00000005	JFLT01	1053
	60989	GC_00000005	JFLU01	1237
	60990	GC_00000005	JFLU01	1529
	60991	GC_00000005	JFLU01	1238
	60992	GC_00000005	JFLW01	1026
	60993	GC_00000005	JFLW01	1474
	60994	GC_00000005	JFLW01	1233
	60995	GC_00000005	JFLX01	1406
	60996	GC_00000005	JFLX01	1663
	60997	GC_00000005	JFLX01	1407
	60998	GC_00000005	JFLY01	1013
	60999	GC_00000005	JFLY01	1227
	61000	GC_00000005	JFMA01	1196
	61001	GC_00000005	JFMA01	1197
	61002	GC_00000005	JFMC01	1333
	61003	GC_00000005	JFMC01	1334
	61004	GC_00000005	JFMD01	993
	61005	GC_00000005	JFME01	1353
	61006	GC_00000005	JFME01	1094
	61007	GC_00000005	JFMG01	1457
	61008	GC_00000005	JFMG01	1220
	61009	GC_00000005	JFMI01	899
	61010	GC_00000005	JFMJ01	1087
	61011	GC_00000005	JFMJ01	1088
	61012	GC_00000005	JFML01	1305
	61013	GC_00000005	JFMM01	1498
	61014	GC_00000005	JFMM01	1222
	61015	GC_00000005	JFMM01	1221
	61016	GC_00000005	JFMM01	1220
	61017	GC_00000005	JFMN01	1030
	61018	GC_00000005	JFMN01	1291
	61019	GC_00000005	JFMN01	1031
	61020	GC_00000005	JFMO01	1304
	61021	GC_00000005	JFMO01	1531
	61022	GC_00000005	JFMO01	1305
	61023	GC_00000005	JFMP01	1220
	61024	GC_00000005	JFMP01	1365
	61025	GC_00000005	JFMP01	1221
	61026	GC_00000005	JFMQ01	1035
	61027	GC_00000005	JFMQ01	828
	61028	GC_00000005	JFMR01	1317
	61029	GC_00000005	JFMR01	1555
	61030	GC_00000005	JFMR01	1318
	61031	GC_00000005	JFMT01	1222
	61032	GC_00000005	JFMT01	1223
	61033	GC_00000005	JFMT01	1496
	61034	GC_00000005	JFMV01	1286
	61035	GC_00000005	JFMV01	1287
	61036	GC_00000005	JFMX01	1405
	61037	GC_00000005	JFMX01	1192
	61038	GC_00000005	JFMY01	1647
	61039	GC_00000005	JFMY01	166
	61040	GC_00000005	JFMY01	1648
	61041	GC_00000005	JFMZ01	1332
	61042	GC_00000005	JFMZ01	1598
	61043	GC_00000005	JFMZ01	1333
	61044	GC_00000005	JFNA01	1384
	61045	GC_00000005	JFNA01	1193
	61046	GC_00000005	JFNA01	1754
	61047	GC_00000005	JFNC01	1060
	61048	GC_00000005	JFND01	1185
	61049	GC_00000005	JFND01	1381
	61050	GC_00000005	JFND01	1186
	61051	GC_00000005	JFNF01	1483
	61052	GC_00000005	JFNG01	1484
	61053	GC_00000005	JFNG01	1485
	61054	GC_00000005	JFNH01	987
	61055	GC_00000005	JFNH01	988
	61056	GC_00000005	JFNJ01	1360
	61057	GC_00000005	JFNJ01	1143
	61058	GC_00000005	JFNK01	1875
	61059	GC_00000005	JFNK01	1346
	61060	GC_00000005	JFNL01	1161
	61061	GC_00000005	JFNM01	1152
	61062	GC_00000005	JFNM01	1438
	61063	GC_00000005	JFNM01	1153
	61064	GC_00000005	JFNN01	1162
	61065	GC_00000005	JFNN01	1163
	61066	GC_00000005	JFNO01	1075
	61067	GC_00000005	JFNP01	646
	61068	GC_00000005	JFNQ01	603
	61069	GC_00000005	JFNS01	941
	61070	GC_00000005	JFNU01	1343
	61071	GC_00000005	JFNU01	1084
	61072	GC_00000005	JFNW01	1077
	61073	GC_00000005	JFNX01	1504
	61074	GC_00000005	JFNZ01	1267
	61075	GC_00000005	JFNZ01	1485
	61076	GC_00000005	JFNZ01	1268
	61077	GC_00000005	JFOA01	1128
	61078	GC_00000005	JFOA01	1129
	61079	GC_00000005	JFOD01	1437
	61080	GC_00000005	JFOD01	1248
	61081	GC_00000005	LG	7884
	61082	GC_00000005	MED4	10510
	61083	GC_00000005	MED4	10138
	61084	GC_00000005	MED4	10812
	61085	GC_00000005	MIT9107	11429
	61086	GC_00000005	MIT9107	11298
	61087	GC_00000005	MIT9116	13094
	61088	GC_00000005	MIT9116	13180
	61089	GC_00000005	MIT9123	15693
	61090	GC_00000005	MIT9123	15933
	61091	GC_00000005	MIT9201	17234
	61092	GC_00000005	MIT9201	17256
	61093	GC_00000005	MIT9201	17270
	61094	GC_00000005	MIT9201	17235
	61095	GC_00000005	MIT9202	19273
	61096	GC_00000005	MIT9202	18945
	61097	GC_00000005	MIT9202	18992
	61098	GC_00000005	MIT9211	21837
	61099	GC_00000005	MIT9215	23775
	61100	GC_00000005	MIT9215	24067
	61101	GC_00000005	MIT9215	23728
	61102	GC_00000005	MIT9301	25685
	61103	GC_00000005	MIT9301	25954
	61104	GC_00000005	MIT9301	25693
	61105	GC_00000005	MIT9302	27948
	61106	GC_00000005	MIT9302	27268
	61107	GC_00000005	MIT9302	27934
	61108	GC_00000005	MIT9302	27655
	61109	GC_00000005	MIT9302	27963
	61110	GC_00000005	MIT9303	29029
	61111	GC_00000005	MIT9311	31405
	61112	GC_00000005	MIT9311	31389
	61113	GC_00000005	MIT9311	31884
	61114	GC_00000005	MIT9311	31429
	61115	GC_00000005	MIT9312	34441
	61116	GC_00000005	MIT9312	34425
	61117	GC_00000005	MIT9312	34153
	61118	GC_00000005	MIT9312	34465
	61119	GC_00000005	MIT9314	39189
	61120	GC_00000005	MIT9314	38883
	61121	GC_00000005	MIT9314	39188
	61122	GC_00000005	MIT9314	37807
	61123	GC_00000005	MIT9321	40800
	61124	GC_00000005	MIT9321	41078
	61125	GC_00000005	MIT9322	42021
	61126	GC_00000005	MIT9322	42290
	61127	GC_00000005	MIT9401	43270
	61128	GC_00000005	MIT9401	44134
	61129	GC_00000005	MIT9515	46446
	61130	GC_00000005	MIT9515	45785
	61131	GC_00000005	MIT9515	46617
	61132	GC_00000005	MIT9515	46173
	61133	GC_00000005	NATL1A	47860
	61134	GC_00000005	NATL1A	48428
	61135	GC_00000005	NATL1A	47950
	61136	GC_00000005	NATL2A	49841
	61137	GC_00000005	NATL2A	50401
	61138	GC_00000005	PAC1	51367
	61139	GC_00000005	SB	54366
	61140	GC_00000005	SB	54621
	61141	GC_00000005	SS2	56209
	61142	GC_00000005	SS35	57378
	61143	GC_00000005	SS51	59826
	86732	GC_00000006	AS9601	105
	86733	GC_00000006	AS9601	1641
	86734	GC_00000006	CCMP1375	3462
	86735	GC_00000006	CCMP1375	1971
	86736	GC_00000006	EQPAC1	4011
	86737	GC_00000006	EQPAC1	4687
	86738	GC_00000006	GP2	5831
	86739	GC_00000006	GP2	7152
	86740	GC_00000006	JFKN01	100
	86741	GC_00000006	JFKN01	1222
	86742	GC_00000006	JFKQ01	102
	86743	GC_00000006	JFKT01	89
	86744	GC_00000006	JFKT01	1403
	86745	GC_00000006	JFKU01	95
	86746	GC_00000006	JFKU01	1172
	86747	GC_00000006	JFKW01	79
	86748	GC_00000006	JFKW01	1428
	86749	GC_00000006	JFKW01	1429
	86750	GC_00000006	JFKX01	73
	86751	GC_00000006	JFKX01	72
	86752	GC_00000006	JFKX01	71
	86753	GC_00000006	JFKX01	74
	86754	GC_00000006	JFKX01	1187
	86755	GC_00000006	JFKY01	94
	86756	GC_00000006	JFKY01	1221
	86757	GC_00000006	JFLA01	1773
	86758	GC_00000006	JFLA01	1442
	86759	GC_00000006	JFLA01	1441
	86760	GC_00000006	JFLA01	1440
	86761	GC_00000006	JFLB01	1784
	86762	GC_00000006	JFLB01	1460
	86763	GC_00000006	JFLC01	100
	86764	GC_00000006	JFLC01	102
	86765	GC_00000006	JFLC01	101
	86766	GC_00000006	JFLC01	1591
	86767	GC_00000006	JFLD01	120
	86768	GC_00000006	JFLE01	117
	86769	GC_00000006	JFLE01	1644
	86770	GC_00000006	JFLF01	122
	86771	GC_00000006	JFLF01	121
	86772	GC_00000006	JFLF01	1599
	86773	GC_00000006	JFLG01	189
	86774	GC_00000006	JFLG01	1666
	86775	GC_00000006	JFLH01	70
	86776	GC_00000006	JFLI01	127
	86777	GC_00000006	JFLJ01	48
	86778	GC_00000006	JFLJ01	1536
	86779	GC_00000006	JFLK01	101
	86780	GC_00000006	JFLL01	95
	86781	GC_00000006	JFLL01	1575
	86782	GC_00000006	JFLM01	101
	86783	GC_00000006	JFLM01	1548
	86784	GC_00000006	JFLN01	1723
	86785	GC_00000006	JFLO01	85
	86786	GC_00000006	JFLO01	1565
	86787	GC_00000006	JFLP01	66
	86788	GC_00000006	JFLP01	1332
	86789	GC_00000006	JFLQ01	95
	86790	GC_00000006	JFLQ01	1709
	86791	GC_00000006	JFLS01	110
	86792	GC_00000006	JFLS01	1291
	86793	GC_00000006	JFLT01	1473
	86794	GC_00000006	JFLT01	1148
	86795	GC_00000006	JFLU01	96
	86796	GC_00000006	JFLU01	97
	86797	GC_00000006	JFLU01	1851
	86798	GC_00000006	JFLU01	1604
	86799	GC_00000006	JFLW01	86
	86800	GC_00000006	JFLW01	1599
	86801	GC_00000006	JFLX01	288
	86802	GC_00000006	JFLX01	1768
	86803	GC_00000006	JFLY01	86
	86804	GC_00000006	JFLY01	1550
	86805	GC_00000006	JFMA01	90
	86806	GC_00000006	JFMA01	1359
	86807	GC_00000006	JFMC01	222
	86808	GC_00000006	JFMC01	1613
	86809	GC_00000006	JFMD01	96
	86810	GC_00000006	JFMD01	1095
	86811	GC_00000006	JFMD01	1094
	86812	GC_00000006	JFME01	106
	86813	GC_00000006	JFME01	1445
	86814	GC_00000006	JFMG01	95
	86815	GC_00000006	JFMG01	1570
	86816	GC_00000006	JFMI01	105
	86817	GC_00000006	JFMI01	1005
	86818	GC_00000006	JFMJ01	1425
	86819	GC_00000006	JFML01	131
	86820	GC_00000006	JFML01	1640
	86821	GC_00000006	JFMM01	137
	86822	GC_00000006	JFMM01	1590
	86823	GC_00000006	JFMN01	72
	86824	GC_00000006	JFMN01	1360
	86825	GC_00000006	JFMO01	89
	86826	GC_00000006	JFMO01	1623
	86827	GC_00000006	JFMP01	95
	86828	GC_00000006	JFMP01	1462
	86829	GC_00000006	JFMQ01	86
	86830	GC_00000006	JFMQ01	1117
	86831	GC_00000006	JFMR01	91
	86832	GC_00000006	JFMR01	1649
	86833	GC_00000006	JFMT01	96
	86834	GC_00000006	JFMT01	1602
	86835	GC_00000006	JFMV01	97
	86836	GC_00000006	JFMV01	1432
	86837	GC_00000006	JFMX01	128
	86838	GC_00000006	JFMX01	1517
	86839	GC_00000006	JFMY01	590
	86840	GC_00000006	JFMY01	266
	86841	GC_00000006	JFMZ01	111
	86842	GC_00000006	JFMZ01	1697
	86843	GC_00000006	JFNA01	90
	86844	GC_00000006	JFNA01	1462
	86845	GC_00000006	JFNC01	84
	86846	GC_00000006	JFNC01	1423
	86847	GC_00000006	JFND01	159
	86848	GC_00000006	JFND01	1486
	86849	GC_00000006	JFNE01	88
	86850	GC_00000006	JFNE01	1524
	86851	GC_00000006	JFNF01	1568
	86852	GC_00000006	JFNG01	248
	86853	GC_00000006	JFNG01	1747
	86854	GC_00000006	JFNH01	112
	86855	GC_00000006	JFNJ01	101
	86856	GC_00000006	JFNJ01	1463
	86857	GC_00000006	JFNK01	1649
	86858	GC_00000006	JFNL01	68
	86859	GC_00000006	JFNL01	69
	86860	GC_00000006	JFNL01	1313
	86861	GC_00000006	JFNM01	105
	86862	GC_00000006	JFNN01	88
	86863	GC_00000006	JFNN01	1478
	86864	GC_00000006	JFNO01	69
	86865	GC_00000006	JFNP01	93
	86866	GC_00000006	JFNP01	1271
	86867	GC_00000006	JFNQ01	1323
	86868	GC_00000006	JFNQ01	959
	86869	GC_00000006	JFNR01	1127
	86870	GC_00000006	JFNS01	56
	86871	GC_00000006	JFNT01	82
	86872	GC_00000006	JFNT01	1385
	86873	GC_00000006	JFNU01	1732
	86874	GC_00000006	JFNU01	1414
	86875	GC_00000006	JFNW01	82
	86876	GC_00000006	JFNW01	1307
	86877	GC_00000006	JFNX01	90
	86878	GC_00000006	JFNX01	1592
	86879	GC_00000006	JFNZ01	83
	86880	GC_00000006	JFOD01	84
	86881	GC_00000006	JFOD01	1532
	86882	GC_00000006	LG	9038
	86883	GC_00000006	LG	8429
	86884	GC_00000006	MED4	9346
	86885	GC_00000006	MED4	10918
	86886	GC_00000006	MIT9107	12916
	86887	GC_00000006	MIT9107	11704
	86888	GC_00000006	MIT9116	14913
	86889	GC_00000006	MIT9116	13500
	86890	GC_00000006	MIT9123	15201
	86891	GC_00000006	MIT9123	15577
	86892	GC_00000006	MIT9201	18710
	86893	GC_00000006	MIT9201	17734
	86894	GC_00000006	MIT9202	19737
	86895	GC_00000006	MIT9202	19395
	86896	GC_00000006	MIT9211	22245
	86897	GC_00000006	MIT9211	20831
	86898	GC_00000006	MIT9215	22581
	86899	GC_00000006	MIT9215	24198
	86900	GC_00000006	MIT9301	24531
	86901	GC_00000006	MIT9301	26050
	86902	GC_00000006	MIT9302	26437
	86903	GC_00000006	MIT9302	28050
	86904	GC_00000006	MIT9303	28640
	86905	GC_00000006	MIT9303	28469
	86906	GC_00000006	MIT9311	32252
	86907	GC_00000006	MIT9311	31504
	86908	GC_00000006	MIT9312	32961
	86909	GC_00000006	MIT9312	34540
	86910	GC_00000006	MIT9313	36481
	86911	GC_00000006	MIT9313	36628
	86912	GC_00000006	MIT9314	38404
	86913	GC_00000006	MIT9314	38784
	86914	GC_00000006	MIT9321	39418
	86915	GC_00000006	MIT9321	40702
	86916	GC_00000006	MIT9322	41574
	86917	GC_00000006	MIT9322	41923
	86918	GC_00000006	MIT9401	44845
	86919	GC_00000006	MIT9401	43556
	86920	GC_00000006	MIT9515	45006
	86921	GC_00000006	MIT9515	46538
	86922	GC_00000006	NATL1A	48508
	86923	GC_00000006	NATL1A	46928
	86924	GC_00000006	NATL2A	50481
	86925	GC_00000006	NATL2A	48943
	86926	GC_00000006	PAC1	51622
	86927	GC_00000006	PAC1	51232
	86928	GC_00000006	SB	53953
	86929	GC_00000006	SB	54274
	86930	GC_00000006	SS2	55573
	86931	GC_00000006	SS2	56266
	86932	GC_00000006	SS35	57148
	86933	GC_00000006	SS35	57907
	86934	GC_00000006	SS51	59996
	86935	GC_00000006	SS51	59200
	66593	GC_00000007	AS9601	663
	66594	GC_00000007	AS9601	1319
	66595	GC_00000007	CCMP1375	2611
	66596	GC_00000007	CCMP1375	2711
	66597	GC_00000007	CCMP1375	3269
	66598	GC_00000007	CCMP1375	2997
	66599	GC_00000007	CCMP1375	2995
	66600	GC_00000007	CCMP1375	3001
	66601	GC_00000007	CCMP1375	3109
	66602	GC_00000007	CCMP1375	2716
	66603	GC_00000007	EQPAC1	5153
	66604	GC_00000007	GP2	5705
	66605	GC_00000007	GP2	6805
	66606	GC_00000007	JFKN01	394
	66607	GC_00000007	JFKN01	892
	66608	GC_00000007	JFKQ01	564
	66609	GC_00000007	JFKR01	588
	66610	GC_00000007	JFKT01	580
	66611	GC_00000007	JFKT01	1267
	66612	GC_00000007	JFKU01	474
	66613	GC_00000007	JFKW01	539
	66614	GC_00000007	JFKW01	1128
	66615	GC_00000007	JFKX01	565
	66616	GC_00000007	JFKY01	554
	66617	GC_00000007	JFLA01	537
	66618	GC_00000007	JFLA01	1090
	66619	GC_00000007	JFLA01	1089
	66620	GC_00000007	JFLB01	587
	66621	GC_00000007	JFLC01	625
	66622	GC_00000007	JFLD01	648
	66623	GC_00000007	JFLD01	647
	66624	GC_00000007	JFLD01	646
	66625	GC_00000007	JFLE01	653
	66626	GC_00000007	JFLG01	740
	66627	GC_00000007	JFLH01	970
	66628	GC_00000007	JFLI01	623
	66629	GC_00000007	JFLJ01	552
	66630	GC_00000007	JFLK01	630
	66631	GC_00000007	JFLL01	668
	66632	GC_00000007	JFLM01	680
	66633	GC_00000007	JFLM01	1245
	66634	GC_00000007	JFLM01	681
	66635	GC_00000007	JFLN01	724
	66636	GC_00000007	JFLO01	650
	66637	GC_00000007	JFLP01	610
	66638	GC_00000007	JFLQ01	677
	66639	GC_00000007	JFLS01	623
	66640	GC_00000007	JFLS01	1012
	66641	GC_00000007	JFLU01	709
	66642	GC_00000007	JFLU01	1287
	66643	GC_00000007	JFLW01	640
	66644	GC_00000007	JFLX01	835
	66645	GC_00000007	JFLY01	562
	66646	GC_00000007	JFMA01	675
	66647	GC_00000007	JFMC01	829
	66648	GC_00000007	JFMC01	830
	66649	GC_00000007	JFMD01	520
	66650	GC_00000007	JFME01	519
	66651	GC_00000007	JFMG01	651
	66652	GC_00000007	JFMI01	473
	66653	GC_00000007	JFMJ01	490
	66654	GC_00000007	JFML01	687
	66655	GC_00000007	JFMM01	643
	66656	GC_00000007	JFMN01	474
	66657	GC_00000007	JFMO01	701
	66658	GC_00000007	JFMP01	594
	66659	GC_00000007	JFMQ01	872
	66660	GC_00000007	JFMR01	630
	66661	GC_00000007	JFMT01	1270
	66662	GC_00000007	JFMT01	614
	66663	GC_00000007	JFMV01	658
	66664	GC_00000007	JFMX01	657
	66665	GC_00000007	JFMY01	1083
	66666	GC_00000007	JFMZ01	717
	66667	GC_00000007	JFMZ01	1383
	66668	GC_00000007	JFNA01	636
	66669	GC_00000007	JFNC01	527
	66670	GC_00000007	JFNE01	620
	66671	GC_00000007	JFNF01	620
	66672	GC_00000007	JFNG01	814
	66673	GC_00000007	JFNH01	454
	66674	GC_00000007	JFNJ01	602
	66675	GC_00000007	JFNK01	701
	66676	GC_00000007	JFNL01	606
	66677	GC_00000007	JFNM01	682
	66678	GC_00000007	JFNN01	509
	66679	GC_00000007	JFNO01	452
	66680	GC_00000007	JFNP01	583
	66681	GC_00000007	JFNQ01	479
	66682	GC_00000007	JFNQ01	480
	66683	GC_00000007	JFNR01	524
	66684	GC_00000007	JFNR01	523
	66685	GC_00000007	JFNS01	591
	66686	GC_00000007	JFNT01	631
	66687	GC_00000007	JFNU01	1135
	66688	GC_00000007	JFNW01	514
	66689	GC_00000007	JFNX01	610
	66690	GC_00000007	JFNZ01	663
	66691	GC_00000007	JFOA01	482
	66692	GC_00000007	JFOA01	1179
	66693	GC_00000007	JFOD01	600
	66694	GC_00000007	LG	8194
	66695	GC_00000007	LG	8094
	66696	GC_00000007	LG	7622
	66697	GC_00000007	LG	7878
	66698	GC_00000007	LG	7876
	66699	GC_00000007	LG	7882
	66700	GC_00000007	LG	9247
	66701	GC_00000007	LG	8089
	66702	GC_00000007	MED4	9909
	66703	GC_00000007	MIT9107	11826
	66704	GC_00000007	MIT9107	11349
	66705	GC_00000007	MIT9116	13862
	66706	GC_00000007	MIT9116	13231
	66707	GC_00000007	MIT9123	16459
	66708	GC_00000007	MIT9123	15880
	66709	GC_00000007	MIT9201	18096
	66710	GC_00000007	MIT9201	17471
	66711	GC_00000007	MIT9202	20308
	66712	GC_00000007	MIT9202	19051
	66713	GC_00000007	MIT9211	21420
	66714	GC_00000007	MIT9211	21830
	66715	GC_00000007	MIT9211	22080
	66716	GC_00000007	MIT9211	21631
	66717	GC_00000007	MIT9211	21832
	66718	GC_00000007	MIT9211	21835
	66719	GC_00000007	MIT9211	22101
	66720	GC_00000007	MIT9215	23167
	66721	GC_00000007	MIT9215	23826
	66722	GC_00000007	MIT9301	25059
	66723	GC_00000007	MIT9301	25745
	66724	GC_00000007	MIT9302	27518
	66725	GC_00000007	MIT9302	27705
	66726	GC_00000007	MIT9303	29159
	66727	GC_00000007	MIT9303	29823
	66728	GC_00000007	MIT9311	32758
	66729	GC_00000007	MIT9311	31931
	66730	GC_00000007	MIT9312	33497
	66731	GC_00000007	MIT9312	34200
	66732	GC_00000007	MIT9313	35971
	66733	GC_00000007	MIT9313	35316
	66734	GC_00000007	MIT9314	38257
	66735	GC_00000007	MIT9314	39141
	66736	GC_00000007	MIT9321	40292
	66737	GC_00000007	MIT9321	41026
	66738	GC_00000007	MIT9322	42729
	66739	GC_00000007	MIT9322	42238
	66740	GC_00000007	MIT9401	44591
	66741	GC_00000007	MIT9401	43206
	66742	GC_00000007	MIT9515	45588
	66743	GC_00000007	MIT9515	46221
	66744	GC_00000007	NATL1A	47424
	66745	GC_00000007	NATL1A	48201
	66746	GC_00000007	NATL1A	48200
	66747	GC_00000007	NATL1A	48197
	66748	GC_00000007	NATL1A	47580
	66749	GC_00000007	NATL1A	48196
	66750	GC_00000007	NATL1A	48195
	66751	GC_00000007	NATL2A	49442
	66752	GC_00000007	NATL2A	50176
	66753	GC_00000007	NATL2A	50175
	66754	GC_00000007	NATL2A	50172
	66755	GC_00000007	NATL2A	49597
	66756	GC_00000007	NATL2A	50171
	66757	GC_00000007	NATL2A	50170
	66758	GC_00000007	PAC1	52439
	66759	GC_00000007	PAC1	52173
	66760	GC_00000007	PAC1	52172
	66761	GC_00000007	PAC1	52169
	66762	GC_00000007	PAC1	52593
	66763	GC_00000007	PAC1	52168
	66764	GC_00000007	PAC1	52167
	66765	GC_00000007	SB	53400
	66766	GC_00000007	SB	54559
	66767	GC_00000007	SS2	55129
	66768	GC_00000007	SS2	55917
	66769	GC_00000007	SS2	54904
	66770	GC_00000007	SS2	56203
	66771	GC_00000007	SS2	56201
	66772	GC_00000007	SS2	56207
	66773	GC_00000007	SS2	55064
	66774	GC_00000007	SS2	55922
	66775	GC_00000007	SS35	57771
	66776	GC_00000007	SS35	57671
	66777	GC_00000007	SS35	56795
	66778	GC_00000007	SS35	57384
	66779	GC_00000007	SS35	57386
	66780	GC_00000007	SS35	57380
	66781	GC_00000007	SS35	56635
	66782	GC_00000007	SS35	57666
	66783	GC_00000007	SS51	59434
	66784	GC_00000007	SS51	59534
	66785	GC_00000007	SS51	59026
	66786	GC_00000007	SS51	59820
	66787	GC_00000007	SS51	59818
	66788	GC_00000007	SS51	59824
	66789	GC_00000007	SS51	58866
	66790	GC_00000007	SS51	59539
	2804	GC_00000008	AS9601	764
	2805	GC_00000008	AS9601	247
	2806	GC_00000008	CCMP1375	2991
	2807	GC_00000008	CCMP1375	2123
	2808	GC_00000008	EQPAC1	5017
	2809	GC_00000008	EQPAC1	5576
	2810	GC_00000008	GP2	6297
	2811	GC_00000008	GP2	5972
	2812	GC_00000008	JFKQ01	706
	2813	GC_00000008	JFKQ01	245
	2814	GC_00000008	JFKR01	656
	2815	GC_00000008	JFKT01	678
	2816	GC_00000008	JFKT01	225
	2817	GC_00000008	JFKW01	655
	2818	GC_00000008	JFKW01	224
	2819	GC_00000008	JFKX01	700
	2820	GC_00000008	JFKX01	181
	2821	GC_00000008	JFLA01	639
[truncated: 185,916 more rows]

## Sheet: Metapangenomics of SAGs
Supplementary Table 4
	Results from the metapangenome of five Prochlorococcus SAGs
	Relevance: this metapangenomic analysis revealed that gene clusters PC #33, PC #44 and PC #431 from the metapangenomic analysis of Prochlorococcus cultivars are also dominated by EAGs in SAGs
	3 gene clusters of interest:
	unique_id	Gene_cluster_id	bin_name	genome_name	gene_callers_id	detection	GO_TERMS_ACC	GO_TERMS	COG_CATEGORY_ACC	COG_CATEGORY	PIRSF_ACC	PIRSF	PRINTS_ACC	PRINTS	ProSiteProfiles_ACC	ProSiteProfiles	SUPERFAMILY_ACC	SUPERFAMILY	ProDom_ACC	ProDom	EGGNOG_BACT_ACC	EGGNOG_BACT	Hamap_ACC	Hamap	Gene3D_ACC	Gene3D	COG_FUNCTION_ACC	COG_FUNCTION	KEGG_PATHWAYS_ACC	KEGG_PATHWAYS	Pfam_ACC	Pfam	SMART_ACC	SMART	TIGRFAM_ACC	TIGRFAM	ProSitePatterns_ACC	ProSitePatterns	Coils_ACC	Coils	aa_sequence
	2457	GC_00000265	Bin_1	JFNQ01	5397	NOT DETECTED				M							SSF51735	SSF51735			264731.PRU_1542	NAD dependent epimerase dehydratase family protein			G3DSA:3.40.50.720	G3DSA:3.40.50.720	COG0451	Nucleoside-diphosphate-sugar epimerase		map00052, map00500, map00520, map01100, map01110	PF16363	GDP-mannose 4,6 dehydratase							Coil	Coil	-------------------------------VIGIDNFNNYYDVKLKKSRIENIEKSKNTLNKKWIFIKCDLLEKIKLNEIFVKYKPEYVINLAAQAGVRYSIDKPNEYINSNILGFMNLLECCRHRGIKHLIYASSSSVYG-----------------------------------------------------------------------------------------------------------------------------------------------------------------------------------------------------------------
	2456	GC_00000265	Bin_1	JFNQ01	4310	NOT DETECTED		GO:0000271, GO:0003674, GO:0003824, GO:0005975, GO:0005976, GO:0006629, GO:0008150, GO:0008152, GO:0008610, GO:0008653, GO:0009058, GO:0009059, GO:0009103, GO:0009243, GO:0009987, GO:0016043, GO:0016051, GO:0016853, GO:0016854, GO:0016857, GO:0033692, GO:0034637, GO:0034645, GO:0043170, GO:0044237, GO:0044238, GO:0044249, GO:0044255, GO:0044260, GO:0044262, GO:0044264, GO:0044699, GO:0044710, GO:…		M			PR01713	Nucleotide sugar epimerase signature			SSF51735	SSF51735			261292.Nit79A3_1528	Nad-dependent epimerase dehydratase			G3DSA:3.90.25.10	G3DSA:3.90.25.10	COG0451	Nucleoside-diphosphate-sugar epimerase		map00052, map00500, map00520, map01100, map01110											------------------------------------------------------------------------------------------------------------------------------------------------------------------------------------------------------------------------------KMLRDFTYIDDVTIVISKVLDKIPESNSKFNFSDPVASQSWSPFKIFNVGNSNPTKLLKFIEIIEKTLGIKAKEEFLTMQLGDVEATFSDSRLINKWVGFKPKTTIEEGLEKFIKWYLNYH--------
	2453	GC_00000265	Bin_1	JFLQ01	8941	NOT DETECTED				M			PR01713	Nucleotide sugar epimerase signature			SSF51735	SSF51735			387092.NIS_1416	nad-dependent epimerase dehydratase			G3DSA:3.40.50.720	G3DSA:3.40.50.720	COG0451	Nucleoside-diphosphate-sugar epimerase		map00052, map00500, map00520, map01100, map01110	PF16363	GDP-mannose 4,6 dehydratase									-----MKILVTGSAGFIGFHLSKELLKNGNTVIGIDNFNDYYDVNLKIERNKYLLNYANEIGAKFEIFKENLTNYDSLHQIFKEQNIDKVVHLAAQAGVRYSISNPSKYIQSNIVGFSHILELCKIHKIKHLLYASSSSVYGGNKNVPFKEQDNVDHPISLYAASKKSNELMAHTYSHLFNLPTTGLRFFTVYGPWGRPDMALFLFTEKILKNKEIEVFNYGDMIRDFTYIDDIVESINKLIFKIPKENNKFDFKNQNPSESWAPYKVFNIGNSSPINLMEYINEIELNLERKASKKFLPLQPGDVRTTSANTDLLRDWIGYKPSTTIQFGIKQFIDWYKYFYKIE-----
	2455	GC_00000265	Bin_1	JFNG01	1639	NOT DETECTED				M			PR01713	Nucleotide sugar epimerase signature			SSF51735	SSF51735			32051.SynWH7803_0245	Nucleotide sugar epimerase			G3DSA:3.40.50.720	G3DSA:3.40.50.720	COG1088	dTDP-D-glucose 4,6-dehydratase		map00500, map00520, map00521, map00523, map01055, map01100, map01110	PF16363	GDP-mannose 4,6 dehydratase									-----MKILITGAAGFIGFHLSKKLLKEGEKVFGIDNLNTYYDQNLKKDRLKELENISTNTINNFKFLLGDISEKKFICKAFEENKPEVVINLAAQAGVRYSLENPSAYINSNIVGFANILEACRNNQIKNLIYASSSSVYGGNKKMPFSENDSVDHPVSLYAASKKSNELMAHTYAHLYGLPVTGLRFFTVYGPWGRPDMALYLFTKAILEEKPIEIFNYGKMKRDFTFIDDIIESISRLIKKPALPNNDFNFLDPDSSSSWASHRIFNIGNSSPVELMEYINELESALGKNAVKKFLPIQKGDVEATYADTSLLTEWIGFSPKTSIKYGISKFVNWYKSYHNLN-----
	2452	GC_00000265	Bin_1	JFLJ01	3172	NOT DETECTED				M			PR01713	Nucleotide sugar epimerase signature			SSF51735	SSF51735			32051.SynWH7803_0245	Nucleotide sugar epimerase			G3DSA:3.40.50.720	G3DSA:3.40.50.720	COG1088	dTDP-D-glucose 4,6-dehydratase		map00500, map00520, map00521, map00523, map01055, map01100, map01110	PF16363	GDP-mannose 4,6 dehydratase									-----MSIVITGAAGFIGYHLSKRILRENISLIGIDNMNDYYDINLKEARLKELQKIALKQDVNFKFYKENINNKSRIEEIFKKYKPEIVINLAAQAGVRYSMENPSAYIQTNLVGFSNILELCRNYPVKHLIYASSSSVYGGNTKMPFSEKQSVDHPVSLYAATKRSNELLAHSYSHIYSIPATGLRFFTVYGPWGRPDMALFLFTKSILQGEPIKVFNHGEMTRDFTYIDDIVESIMRLLKKPPIQDKSFDTSNPNPAISWAPHRIFNIGNSTPESLQDYIKAIEENLGIKAKKELLPMQPGDVPATYSDCTSLESFINYKPSTSIKDGIRKFITWYREFYGK------
	2454	GC_00000265	Bin_1	JFLW01	7001	NOT DETECTED				M			PR01713	Nucleotide sugar epimerase signature			SSF51735	SSF51735			32051.SynWH7803_0245	Nucleotide sugar epimerase			G3DSA:3.40.50.720	G3DSA:3.40.50.720	COG1088	dTDP-D-glucose 4,6-dehydratase		map00500, map00520, map00521, map00523, map01055, map01100, map01110	PF01370	NAD dependent epimerase/dehydratase family									MSIIEERVLVTGAAGFIGAAVSAELLNQGFNVFGLDNLNNYYDVNLKLQRIQLIEKYSLNKKNKWHFIKCDIGDKKQINEIFDHITPSMVINLAAQAGVRHSIKYPEEYIYSNLLGFSNILECCRKIKIKNLIYASSSSVYGGNSKTPFEETDSVSHPVSLYAATKKSNELMAHSYSHLYGIPSTGMRFFTVYGPWGRPDMAPMIFANKILNKIPIEVFNFGKMKRDFTYIDDVVSSIISCCMKPATQDMNFDRFNPNPSTSFSPHRIFNVGNSKPVELLKFIELLETALGEKAIKLMKPIQKGDVKETFANTKLLEEWIGFIPKVSIEKGIVKFAKWYLDYYWKKSNKFN
	5034	GC_00000201	Bin_1	JFNQ01	4413	NOT DETECTED				M							SSF51735	SSF51735			167539.Pro1312	Udp-glucose 6-dehydrogenase			G3DSA:3.40.50.720	G3DSA:3.40.50.720	COG1004	UDP-glucose 6-dehydrogenase		map00040, map00053, map00500, map00520, map01100, map01110	PF03721	UDP-glucose/GDP-mannose dehydrogenase family, NAD binding domain									---MKYKINNICCIGAGYVGGPTMAVIADKCPDIQIEVVDINKDRIRQWNENDFEKLPIFEPGLAEIIKRCRGKNLHFSN--------------------------------------------------------------------------------------------------------------------------------------------------------------------------------------------------------------------------------------------FVEEKI-----------------------------------------------------------------------------…
	5030	GC_00000201	Bin_1	JFLQ01	8937	NOT DETECTED				M	PIRSF500134	PIRSF500134					SSF51735	SSF51735			167539.Pro1312	Udp-glucose 6-dehydrogenase			G3DSA:3.40.50.720	G3DSA:3.40.50.720	COG1004	UDP-glucose 6-dehydrogenase		map00040, map00053, map00500, map00520, map01100, map01110	PF03721	UDP-glucose/GDP-mannose dehydrogenase family, NAD binding domain	SM00984	UDP binding domain	TIGR03026	NDP-sugDHase: nucleotide sugar dehydrogenase					MKNLKSKIKNICCIGAGYVGGPTMSVIADKCPDIMVTVVDINTEKINCWNEEDLKKLPIFEPNLEEVISRVRNRNLFFSTDIENSIKKADLIFISVNTPIKEKGIGSGKASNLKWVESSARQISSYAEGHTIVVEKSTLPVRTAETIKNILASSF----KDNNKSFSVLSNPEFLSEGNALNDLLNPDRVLIGGEDYESINVLKEIYTRWVDPKKIICTNVWSSELSKLVANAFLAQRISSINTVSAICEASGAEVNEVAKAVGTDKRIGSKFLNPGPGFGGSCFKKDILNLVYLCNHFGLPEVAEFWEQVIKMNTWQQERIYKVVVSRLFGNVDNKKLAILGFSFKSNTNDTRESPAIELCKNLLNEGAFLAINDPKVKKNQIEKDLNLNESSNQDI-…
	5032	GC_00000201	Bin_1	JFNG01	1570	NOT DETECTED				M	PIRSF500134	PIRSF500134					SSF51735	SSF51735			74546.PMT9312_1312	Udp-glucose 6-dehydrogenase			G3DSA:3.40.50.720	G3DSA:3.40.50.720	COG1004	UDP-glucose 6-dehydrogenase		map00040, map00053, map00500, map00520, map01100, map01110	PF03721	UDP-glucose/GDP-mannose dehydrogenase family, NAD binding domain	SM00984	UDP binding domain	TIGR03026	NDP-sugDHase: nucleotide sugar dehydrogenase					---MIPEVKNICCIGAGYVGGPTMSVIAEKCPHIKVNVVDTNKKRIDLWNSKNLNNLPIYEPGLKSIIKKCRGKNLFFTVDTELEIKKADMIFISVNTPTKTKGLGAGQASDLKWVELCARQVAQFGTGHTIVVEKSTLPVKTAEVIKSILESSNSEKTNNEKKTFDVLSNPEFLAEGSAINDLKNPDRVLIGGNNNDAIIALNNIYSHWVPKEKILHTNIWSSELAKLTANAFLAQRISSINSIAAICEVTGADISEVSRAIGSDTRIGSKFLDSGPGFGGSCFKKDILNLVYLCKYYDLYEVGRFWESVVELNNWNQNRISNLIIKKLFGTVSGKKIFILGFAFKANTNDTRESAAIKICKDLLNEGAQLYINDPKVIPEQITEVLGMNESNKKEIA…
	5031	GC_00000201	Bin_1	JFLW01	6997	NOT DETECTED				M	PIRSF500133	PIRSF500133					SSF51735	SSF51735			74546.PMT9312_1312	Udp-glucose 6-dehydrogenase			G3DSA:3.40.50.720	G3DSA:3.40.50.720	COG1004	UDP-glucose 6-dehydrogenase		map00040, map00053, map00500, map00520, map01100, map01110	PF03721	UDP-glucose/GDP-mannose dehydrogenase family, NAD binding domain	SM00984	UDP binding domain	TIGR03026	NDP-sugDHase: nucleotide sugar dehydrogenase					---MHKHLKNICCIGAGYVGGPTMSVIADKCSDITVNVVDSNKKRIDLWNSKDLNKLPIFEPGLEEIIKRCRGRNLYFSENIKECIAKADMIFISVNTPTKKKGIGAGKASDLKWVEACARQVAEFSSGYTIVVEKSTLPVKTAEAIKSILESAQVSLGKNSNKSFDVLSNPEFLSEGSAIEDLENPDRVLIGGDNKKAIEVLSHIYRNWVPKQKILHTNIWSSELAKLTANAFLAQRISSINAISALCESTGADVREVARAIGTDSRIGSKFLDSGPGFGGSCFKKDILNLVYLSNYFGLKEVANFWEGVVHLNNWHQHRISELIIKRLLGTITGKKIVILGFAFKANTNDTRESAAIRICKDLLEEGAILFIHDPKVDPNQISEDLNIKENIKLKKH…
	5033	GC_00000201	Bin_1	JFNQ01	3821	NOT DETECTED				M							SSF52413	SSF52413			93059.P9211_03421	Udp-glucose 6-dehydrogenase			G3DSA:3.40.50.720	G3DSA:3.40.50.720	COG1004	UDP-glucose 6-dehydrogenase		map00040, map00053, map00500, map00520, map01100, map01110	PF03720	UDP-glucose/GDP-mannose dehydrogenase family, UDP binding domain									----------------------------------------------------------------------------------------------------------------------------------------------------------------------------------------------------------------------------------------------------------------------------------------GGSCFKKDILNLVYLAEYFRLTEVANFWESVVKINSWHQKRISEIIVKKLFGTVANKKLVILGFAFKANTNDTRESAAITICKDLLNEGANLV--------------------------…
	5029	GC_00000201	Bin_1	JFLJ01	3152	NOT DETECTED				M	PIRSF500134	PIRSF500134					SSF51735	SSF51735			93060.P9215_14111	Udp-glucose 6-dehydrogenase			G3DSA:3.40.50.720	G3DSA:3.40.50.720	COG1004	UDP-glucose 6-dehydrogenase		map00040, map00053, map00500, map00520, map01100, map01110	PF03721	UDP-glucose/GDP-mannose dehydrogenase family, NAD binding domain	SM00984	UDP binding domain	TIGR03026	NDP-sugDHase: nucleotide sugar dehydrogenase					-----------------------MAVIAKNCPNLEVEVVDINESRIKAWNDTNLDNLPVFEPGLSEILKDVRNKNLTFSTNVEYSIKKSDMIFISVNTPIKKKGMGAGQTSDLRWVESCARQISQSAKGHTIVVEKSTLPVKTAQTIKEILDSPSIN-NSNEDRTFSVLSNPEFLAEGTAISDLVNPDRVLIGGDDLEAMNALKEIYIKWVPESKIIFTNLWSSELSKLSANAFLAQRISSINSLSAICEVTGAEIGDVSDAVGMDSRIGSKFLKAGPGFGGSCFKKDILNLVYLSRFYGLNEVADFWQETVEINSWQKTRIYKEIVARLFGNLADKKIAILGFAFKENTNDTRESPAIDICKNLLDEGAFLNIHDCKVNEETIDKDLCRKKSSNRKM-…
	3810	GC_00000113	Bin_1	JFNG01	1569	NOT DETECTED				M							SSF51182	SSF51182			146891.A9601_13981	Mannose-1-phosphate guanylyltransferase			G3DSA:3.90.550.10	G3DSA:3.90.550.10	COG0662, COG0836	Mannose-6-phosphate isomerase, cupin superfamily; Mannose-1-phosphate guanylyltransferase		map00051, map00520, map01100, map01110	PF01050	Mannose-6-phosphate isomerase			TIGR01479	GMP_PMI: mannose-1-phosphate guanylyltransferase/mannose-6-phosphate isomerase			Coil	Coil	---------MEEKIIPVIMCGGTGSRLWPLSRKSFPKQFLSLNN-NKKSLLQNTQLRLRNLKNLINPILVCNEEHRFIVAEQMREIDIKPFSILLEPFGRNTAPAITMAALKALELGEEVDPIILVLSSDHEINNTKNFLEVIYKGVEFAKNDRLVSFGIVPTSPHTGYGYIKAKKPLDPKKISGENILEFTEKPNLELAEQFIKDKRYTWNSGIFMFKAKTILNEFKKFDSYILECCKESLLKSEFDLDFQRLNRETFKKCPNISIDFSIMEKSNKGTVLPLDAGWSDIGSWESLWENSKKDKDGNYIDGRVINHSSKDSFLSSNSRLLVGIGLKNIIAVETKDAILISEKSDSQKVKDIVKTLKDKEFPEGETHLKIFRPWGFYISIAEESTWQVKL…
	3807	GC_00000113	Bin_1	JFLJ01	3171	NOT DETECTED				M							SSF51182	SSF51182			146891.A9601_13981	Mannose-1-phosphate guanylyltransferase			G3DSA:3.90.550.10	G3DSA:3.90.550.10	COG0662, COG0836	Mannose-6-phosphate isomerase, cupin superfamily; Mannose-1-phosphate guanylyltransferase		map00051, map00520, map01100, map01110	PF01050	Mannose-6-phosphate isomerase			TIGR01479	GMP_PMI: mannose-1-phosphate guanylyltransferase/mannose-6-phosphate isomerase					--------MSEFSIIPVILCGGSGSRLWPLSRKSFPKQFLSISSETNKSLLQNTYQRIKNLKGLKEPILICNEEHRFIVAEQMREINIKPRSILLEPFGRNTAPAVTLAAIKSLEFEN--DAHLLVLSSDHIIEDEEQFIKIINAGIEYANNGRLVTFGVIPDEPATGYGYIKSDGPLEESELKGYKIDGFLEKPDLITANELIKDKRYTWNSGMFLFKANTILNEIKNFAPEVFNACEKSLEEKLLDLDFQRLNQDLFNKCPNISIDVAVMEKTDKGTVLPLRANWTDIGSWNAVWKISKKDESNNFIKGNVIAKNSNNCYFRGEKRLIAALGLKNLIVIETSDAILVADKSQSQQVKNIVNYLKEKGIREGQEHKEIYRPWGSYESIVEEARWKVKI…
	3811	GC_00000113	Bin_1	JFNQ01	4356	NOT DETECTED				M							SSF51182	SSF51182			146891.A9601_13981	Mannose-1-phosphate guanylyltransferase			G3DSA:3.90.550.10	G3DSA:3.90.550.10	COG0662, COG0836	Mannose-6-phosphate isomerase, cupin superfamily; Mannose-1-phosphate guanylyltransferase		map00051, map00520, map01100, map01110	PF01050	Mannose-6-phosphate isomerase									---------------------------------------------------------------------------------------------------------------------------------------------------------------------------------------------------SFDKAVMFLEGKHHLWNSGIFLFKASAILNELKKFEPDLIKNCEESIKKGFVDLDFFRVNKQPFIKCPNIAIDVAVMEKTDLGVVSPLDVGWSDIGSWQSLWAISDKDEKGNLTSGNVLVDNVENSYLKTEERLIVGIGLKNLAVIETVDAVFVADLNQAQSIKKLVSQLETNGQPEGTQHKKIFRPWGNYISLAEGSNWQVKK…
	3809	GC_00000113	Bin_1	JFLW01	6996	NOT DETECTED				M							SSF51182	SSF51182			167555.NATL1_20571	Mannose-1-phosphate guanylyltransferase			G3DSA:3.90.550.10	G3DSA:3.90.550.10	COG0662, COG0836	Mannose-6-phosphate isomerase, cupin superfamily; Mannose-1-phosphate guanylyltransferase		map00051, map00520, map01100, map01110	PF01050	Mannose-6-phosphate isomerase			TIGR01479	GMP_PMI: mannose-1-phosphate guanylyltransferase/mannose-6-phosphate isomerase					---------MNSNIIPVILCGGYGTRLWPLSRESFPKQFLSLSN-DNESLLQKTIKRLSGLENLGEPILICNEDHRFIVAEQMKEINVNPDCIILEPFGKNTAPAISIAALKSLKGKK--DPLLLVLSSDHEIKSEKNFIETIKKGVIYANNNKIIAFGIIPSSPEIGYGYIKSDIPYTDNENEGQNIIEFTEKPNKEKAEKFMKDKRYTWNSGMFMFKASTIIDELKKFTPEIINTCKVALETSTHDLDFDRLNRDSFEKCPNISIDYAVMEKTKKGVVLPLDAGWSDIGSWEAVWETKVKDNRGNYIEGKTYLENSKNCYVKSEDRLVVGIGLENLIVVDTSDAILISSKGETQKVKKVVNQLKQKNISEGRKHRKIYRPWGYYLSIVEDSRWQVKL…
	3808	GC_00000113	Bin_1	JFLQ01	8935	NOT DETECTED				M							SSF51182	SSF51182			59919.PMM1196	Mannose-1-phosphate guanylyltransferase			G3DSA:3.90.550.10	G3DSA:3.90.550.10	COG0662, COG0836	Mannose-6-phosphate isomerase, cupin superfamily; Mannose-1-phosphate guanylyltransferase		map00051, map00520, map01100, map01110	PF00483	Nucleotidyl transferase			TIGR01479	GMP_PMI: mannose-1-phosphate guanylyltransferase/mannose-6-phosphate isomerase					MENLNDKKTINSDLIPVILSGGSGSRLWPLSRASFPKQYLNLHEKNDLSLLQNTYLRLEGIKNLKNPIIISNAEQRFIVAEQMRSINIKPNSIILEPFGKNTAPAIALAALKSIKEKY--DPYLLILSSDHKIENEDNFRKVVEEGLVHADKGRIVTFGIVPDRPETGYGYIESNEKLSKDK-TASKIKKFIEKPNLNLAKKFIKDKHYLWNSGIFLFRASVILKELEKYEPQIINSCTESLQKGSDDLDFFRINQEPFEKCPNKPIDIAVMERTTLGYVIPLKAGWDDIGSWESVWQNSNKDNEGNSLKGKVIIEQTKNCYLRSEERLIVGINLNNLVVVETNDAVLVANKDYTQRVKEIVHYLKKNKYNEGVENKKMYRPWGSFTSIEKGSSWQVKK…
	3813	GC_00000113	Bin_1	JFNQ01	4465	NOT DETECTED				M							SSF53448	SSF53448			93060.P9215_14171	Mannose-1-phosphate guanylyltransferase			G3DSA:3.90.550.10	G3DSA:3.90.550.10	COG0662, COG0836	Mannose-6-phosphate isomerase, cupin superfamily; Mannose-1-phosphate guanylyltransferase		map00051, map00520, map01100, map01110	PF00483	Nucleotidyl transferase									#NAME?
	3812	GC_00000113	Bin_1	JFNQ01	4405	NOT DETECTED				G							SSF51182	SSF51182			76114.ebA1533	mannose-6-phosphate isomerase			G3DSA:2.60.120.10	G3DSA:2.60.120.10	COG0662	Mannose-6-phosphate isomerase, cupin superfamily		map00051, map00520, map01100, map01110	PF01050	Mannose-6-phosphate isomerase									---------------------------------------------------------------------------------------------------------------------------------------------------------------------------------------------------------------------------------------------------------------------------------------------------------------------------------------------------------------------------------------------------------------…
	All protein clusters:
	unique_id	Gene_cluster_id	bin_name	genome_name	gene_callers_id	detection	GO_TERMS_ACC	GO_TERMS	COG_CATEGORY_ACC	COG_CATEGORY	PIRSF_ACC	PIRSF	PRINTS_ACC	PRINTS	ProSiteProfiles_ACC	ProSiteProfiles	SUPERFAMILY_ACC	SUPERFAMILY	ProDom_ACC	ProDom	EGGNOG_BACT_ACC	EGGNOG_BACT	Hamap_ACC	Hamap	Gene3D_ACC	Gene3D	COG_FUNCTION_ACC	COG_FUNCTION	KEGG_PATHWAYS_ACC	KEGG_PATHWAYS	Pfam_ACC	Pfam	SMART_ACC	SMART	TIGRFAM_ACC	TIGRFAM	ProSitePatterns_ACC	ProSitePatterns	Coils_ACC	Coils	aa_sequence
	1796	GC_00000077	Bin_1	JFNG01	0	DETECTED				T							SSF47384	SSF47384			146891.A9601_17861	Histidine kinase			G3DSA:1.10.287.130	G3DSA:1.10.287.130															MKSQITIKKIQELLIKTVQTIYVDDDTSRRMWWASLEVIQRDFLSQNYKQGGIWVASPLPAFNDKKFLNQLHGWLWSPEGFPYFQNENAGFLPVNNSEKIKKDFDLVSNYKVLNLSQEDGYEPFLMIITPNFQCVLSVVGEKDKKILLMKCDEESLKLSIELMHAKLNQENYEEGVKFRNAINNLGDLNINNQFEKLFWPILSAKLANITPNHNIQNSVKNDEKNVQITEAKLLRAISHEVRTPLATIRTLISSTLKKYKMDESMRNRLIQIDNECNEQIDRFGLIFNAAELVDNEESSLNNLAKINLAEIFNKLAPLWNKQLNRHGISLKIDIPKQLPQILSDSEKLELMLRGLIDKNTRGLKEGSTLILELRPAGQK--------------------…
	7619	GC_00001595	Bin_1	JFNG01	1	DETECTED		GO:0005575, GO:0005618, GO:0005623, GO:0005886, GO:0008150, GO:0008360, GO:0009274, GO:0009276, GO:0016020, GO:0022603, GO:0022604, GO:0030312, GO:0030313, GO:0031975, GO:0044464, GO:0050789, GO:0050793, GO:0050794, GO:0051128, GO:0065007, GO:0065008, GO:0071944		D											74546.PMT9312_1672	Rod shape-determining protein					COG0772	Bacterial cell division protein FtsW, lipid II flippase			PF01098	Cell cycle protein			TIGR02210	rodA_shape: rod shape-determining protein RodA					MFKRISLLNNREFLQKKDNFNRGFLFSPLLIIPLFLVIISGLLIKSIQGELLVSNYLGHILTGFLGYFLAFFISYIPLERLRKYVVPFYLCTLISLLLIYFFGISVSGAQRWLNLGIFSFQPSEVAKLSTVLTLASVLEKKIILVIRDLVLPLLVVIIPWLLIFFQPDLGTSLVLIVLTGVMLYWAKMPIEWILILVFCIITSILYLTLPTLLIFWIPVIGYLAYRSSKKKIIFSALAISFHLLVAKYTPILWQYGLKEYQKDRLVLFLDPNRDPLGGGYHLIQSQIAIGSGGLFGTGLLQGKLTNLQFIPEQHTDFIFSALGEELGFVGCALVLFLFFFLIKKLINTATIARTNFESLIVVGIASTFLFQIIINLFMTIGLGPVTGIPLPFMSYGRTS…
	253	GC_00001474	Bin_1	JFNG01	2	DETECTED				D							SSF52540	SSF52540			167546.P9301_17721	ATP-binding protein	MF_02040	Iron-sulfur cluster carrier protein.	G3DSA:3.40.50.300	G3DSA:3.40.50.300	COG0489	Chromosome partitioning ATPase, Mrp family, contains Fe-S cluster			PF10609	NUBPL iron-transfer P-loop NTPase					PS01215	Mrp family signature.			MTTIEDANFALQKVLDAGSQKNVIELSWIKNVRVTIPRVIVTLSLPSFANSQRDRIVQEVRGVLLNFEDIDDVQIEIDNNPSKTESQNQSNTPDLQKIDGIRHIIAVSSGKGGVGKSTIAVNLACSLAKLGLKTGLLDADIYGPNTPSMMGVAEQNPKVTEGSGSDQRLIPIKKYGISLVSMGFLIEEGQPVIWRGPMLNSIIRQFLYQVEWNNLDFLVIDLPPGTGDAQISLSQSVPISAAIVVTTPQQVSLQDARRGLAMFKQLGVPLLGIVENMSVFIPPDMPGKKYEIFGKGGGQTLANENDLPLLAQIPIEIPLVDDSNKGVPISISQPNKESSVVFGNLAQLVKNQFVNT
	5441	GC_00000227	Bin_1	JFNG01	3	DETECTED		GO:0003674, GO:0003824, GO:0004109, GO:0005488, GO:0005515, GO:0005575, GO:0005622, GO:0005623, GO:0005737, GO:0006082, GO:0006520, GO:0006536, GO:0006725, GO:0006778, GO:0006779, GO:0006782, GO:0006783, GO:0006807, GO:0008150, GO:0008152, GO:0009058, GO:0009064, GO:0009987, GO:0016491, GO:0016627, GO:0016634, GO:0018130, GO:0019353, GO:0019438, GO:0019752, GO:0030145, GO:0033013, GO:0033014, GO:…		H	PIRSF000166	PIRSF000166	PR00073	Coprogen oxidase signature			SSF102886	SSF102886			167546.P9301_17731	Key enzyme in heme biosynthesis. Catalyzes the oxidative decarboxylation of propionic acid side chains of rings A and B of coproporphyrinogen III (By similarity)	MF_00333	Oxygen-dependent coproporphyrinogen-III oxidase [hemF].	G3DSA:3.40.1500.10	G3DSA:3.40.1500.10	COG0408	Coproporphyrinogen III oxidase		map00860, map01100, map01110	PF01218	Coproporphyrinogen III oxidase					PS01021	Coproporphyrinogen III oxidase signature.			MLKEPPKNSREKTKNLLLTLQDKICSGLENVDGKGKFTEETWLRDEGGGGRSRVLKNGSIFEQAGVNFSEVQGKELPQSIISQRPEAKGHEWFATGTSMVLHPKNPYIPTVHLNYRYFEAGPVWWFGGGADLTPFYPYLSDVRNFHNEHKKACEKVDQDLHKVFKPWCDEYFFLKHRNESRGIGGIFYDYQDGSGNIYKGNNQNGEASKASQNIARSNLNWDDL-FSLAENCGQAFLPSYLPIIEKRASQTYSSKERGFQLYRRGRYVEFNLVWDRGTIFGLQTNGRTESILMSLPPLARWEYGYKAKNGSREEFLTSIFTKPQDWLNDKELEKFCIENNIFD---
	4879	GC_00000505	Bin_1	JFNG01	4	DETECTED				S																					PF12046	Protein of unknown function (DUF3529)							Coil	Coil	MSYSLNSTLLLTILLAIGLFFFLRASSKDRTTIVEISSSQKPIKVLNSLCEWLNLRGWKQTGGDFEQRILIFKGQVVSSKFLAIFLGFLGGFGSCALGLVIIQIYPELGWWPILLGLIGGPLSGIVYFKKSAREEKFELRLINENENDSTFMRLRAHRDELISLENELGEKLQLKSDGSLFKTPI
	4629	GC_00000169	Bin_1	JFNG01	5	DETECTED				J							SSF53098	SSF53098			167546.P9301_17761	3-5 exonuclease			G3DSA:3.30.420.10	G3DSA:3.30.420.10	COG0349	Ribonuclease D			PF01612	3'-5' exonuclease	SM00474	3'-5' exonuclease							MTIENKNIDLLYSDLTEDLYNLYKKSSYLAIDTEAMGLIHGRDRLCLVQICNEFKRTSCIKIELNTSSAPHLKKLLEDEKITKIFHYARFDIAALKCNLEINTKNIFCTKIASKLARTYTNKHGLKDLINELLGIELDKSSQSSDWGSNEDLTKDQLDYAANDVRYLIEAMHKLKVILERENRYELAQKCFETVSVHADLDILKFSNIFEH
	1313	GC_00000576	Bin_1	JFNG01	6	DETECTED				S																															MYPINDRQYLKICAEIAKLMSISLSSAKKKVEIQIAKEGSKTIQEKIQVAQNILKICEKNDGDKLSSSRILDKLMETLDGEDNFLTED
	8385	GC_00001216	Bin_1	JFNG01	7	DETECTED				S							SSF53756	SSF53756			146891.A9601_17941	Inherit from COG: Transfers the gamma-phosphate of ATP to the 4'-position of a tetraacyldisaccharide 1-phosphate intermediate (termed DS-1- P) to form tetraacyldisaccharide 1,4'-bis-phosphate (lipid IVA) (By similarity)					COG4370	Uncharacterized protein							TIGR03492	TIGR03492: conserved hypothetical protein					-------MKFLENFVIKCVKKLNKAAPRFELGIKDLQSSALPLGHAAEKDSIDSFYDLNSKMSHSLLFICNGHGEDVIASEIIKRLLKKIKNKNIEVLPLVGNGDVFNSIKSKNFRKIGYLKELPSGGFSNQSLRGFVLDLLAGFLIDNLRNFLLVKKKSKNNCKIIAVGDFLPLLFAWSSECDFSFIGTPKSDHTWSSGPGWDLSDFYHKLKGSEWDPWEIILMKSPRCKNLIMRDKITANNLYKKNIDAKYLGNPMMDFVNVTNDKISNIISFKRIILLVGSRYPEALKNFDNFLNCLQDFDLSKDLLILLPLSINANVIQIQYYLNKYGFIKQSKVKFLIDEDSVWKKKDQYVVIGKGKFNLWANMAEVGLSNAGTATEQIAGLGIPSLSLPGPGP…
	2514	GC_00000884	Bin_1	JFNG01	8	DETECTED				S																															MLHLLLVSIQVMIPRMTLFDSTQELISIKGQNNPKINLTSDKDPILCNHCKRTASNGVRCLGMCVADNDY
	2806	GC_00000438	Bin_1	JFNG01	9	DETECTED				S											167546.P9301_17801	carboxylase domain-containing protein																	Coil	Coil	MPFANNQRITRRRSSAGPTPPKRPIGNNSESIGRQAQGPRPTFLTLRDHGKVFVADLPNLSDGQLAHISKEANEVLNSLEKRLSDLENEPNVSNPENDTLIKASTKRDVTLRFIKSIEEEQEHRKNNPALRDAASESLPRTFLEVARHRLPGATFDSLLREALEACAVDESTEENQVIEEPKETVKIMDLPSSNTNASLVVSIDSGDDSKNDSI
	1532	GC_00000069	Bin_1	JFNG01	10	DETECTED		GO:0003674, GO:0003824, GO:0004641, GO:0005575, GO:0005622, GO:0005623, GO:0005737, GO:0005886, GO:0006139, GO:0006163, GO:0006164, GO:0006725, GO:0006753, GO:0006793, GO:0006796, GO:0006807, GO:0008150, GO:0008152, GO:0009058, GO:0009117, GO:0009150, GO:0009152, GO:0009165, GO:0009259, GO:0009260, GO:0009987, GO:0016020, GO:0016874, GO:0016879, GO:0016882, GO:0018130, GO:0019438, GO:0019637, GO:…		F							SSF56042	SSF56042			167546.P9301_17811	phosphoribosylaminoimidazole synthetase	MF_00741	Phosphoribosylformylglycinamidine cyclo-ligase [purM].	G3DSA:3.30.1330.10	G3DSA:3.30.1330.10	COG0150	Phosphoribosylaminoimidazole (AIR) synthetase		map00230, map01100, map01110	PF02769	AIR synthase related protein, C-terminal domain			TIGR00878	purM: phosphoribosylformylglycinamidine cyclo-ligase					------MDYKTSGVDIEAGREFVSEIKQAVEGTHTSNVIEGIGGFGGLFRIPIDSFKKPVLVSGTDGVGTKLELAQSKNFHFEVGIDLVAMCMNDIITSGAKPLFFLDYIATGKLDKKQLLRVVQGISHGCGENNCSLLGGETAEMPGFYSKNKYDLAGFCVGIVDEDKLINGKKVSENDLIIALKSNGVHSNGFSLVRKIIQNNNQIDKEFEKVSHLNFYDELLKPTKIYNNVINQMLSENIEIKAMSHITGGGIPENLPRCIPSNFIPYINTSSWQIPTLFKFLKEKGSIPEKDFWNTFNLGVGFCLIIDKKFKEAILSICKDHDIDSWEIGKIVRKTDLTISKFLPGILT
	5320	GC_00000250	Bin_1	JFNG01	11	DETECTED		GO:0003674, GO:0003824, GO:0004127, GO:0005575, GO:0005622, GO:0005623, GO:0005737, GO:0006139, GO:0006725, GO:0006753, GO:0006793, GO:0006796, GO:0006807, GO:0008150, GO:0008152, GO:0009117, GO:0009987, GO:0015949, GO:0016301, GO:0016310, GO:0016740, GO:0016772, GO:0019201, GO:0019205, GO:0019637, GO:0034641, GO:0040007, GO:0044237, GO:0044238, GO:0044281, GO:0044424, GO:0044464, GO:0044710, GO:…		F							SSF52374	SSF52374			167546.P9301_17821	Cytidine monophosphate kinase	MF_00158	Pantothenate synthetase [panC].	G3DSA:3.40.50.300	G3DSA:3.40.50.300	COG0283, COG0414	Cytidylate kinase; Panthothenate synthetase		map00240, map00410, map00770, map01100, map01110	PF02569	Pantoate-beta-alanine ligase			TIGR00017	cmk: cytidylate kinase					MKKVIIRKTEEIENWRRNINSAINFIPTMGNLHDGHIKLISTAKNDNSNVNLVSIFINPLQFDNKLDLENYPKTIDNDIKISFSNGADAIFIPSNEDIYPPNNKNIKFLKAPKELSSALCGLNRIGHFDGVCTVVYRLLNLIKPKNLYLGEKDWQQLLILKNLVFRMKLDVAIKSIPTQRDFDGIPLSSRNVHLSKNERKLIGFFSSELLEAKKKFQQDKKINLNQIIKKLSAKKISIEYLEHLHPHTLQKARLEDNISLLAGAIRCGETRLIDHVFLMKRRPIIAIDGPAGSGKSTVTKLIAKKLKLLYLDTGAMYRALSWLMIKESINYKKEKNLQNILKGISIVFKSNTNSHQDVYINNYCVTEEIRSQEISSIVSKISSIKEVREFLVEEQRKIG…
	4126	GC_00000447	Bin_1	JFNG01	12	DETECTED				T			PR00719	LMW phosphotyrosine protein phosphatase signature			SSF52788	SSF52788			146891.A9601_18001	protein tyrosine phosphatase			G3DSA:3.40.50.270	G3DSA:3.40.50.270	COG0394	Protein-tyrosine-phosphatase			PF01451	Low molecular weight phosphotyrosine protein phosphatase	SM00226	Low molecular weight phosphatase family							MNKISVLFVCLGNICRSPAAEAIFIRLLERNGLTDAFIVDSAGTGSWHIGKKADSRMRIAAERRDINILSKARQINSKDFDEFNYILAMDDSNFKNIQDLKNRTASTGFAAIKKIQDFRSVFNDQEVPDPYFGGDEGFDYVLDILEDSVKGFLESIS
	7134	GC_00001130	Bin_1	JFNG01	13	DETECTED				H											167546.P9301_17841	Catalyzes the two-electron reduction of the C2 and C3(1) diene system of 15,16-dihydrobiliverdin (By similarity)	MF_00793	Phycoerythrobilin:ferredoxin oxidoreductase [pebB].						map00860	PF05996	Ferredoxin-dependent bilin reductase									MLIQDTIFYRTDWRWHIFLKYLTNNLSKYNCLEKKIPSEYSYKDSTYGSKKSKKNVNLSTWGVTHKKRIQFARAVCINSPNYSVLNFLIIPNTIYNVPFFGVDFVSLPNSYLIVLDFQPSLKIQNQYNNELLEKLIKFKNHCHSSLPLAEKMSAEVARFFSPGVIWSKLPKEERSDFLITNQLYTSFKKYLDLYLEILFESKEVNVELQKELINGQNNYLNYRRDNDPARPMLSSLFGKEFTESLIEEVLFTT
	5996	GC_00000538	Bin_1	JFNG01	14	DETECTED				H											146891.A9601_18021	Catalyzes the two-electron reduction of biliverdin IX- alpha at the C15 methine bridge (By similarity)	MF_00792	15,16-dihydrobiliverdin:ferredoxin oxidoreductase [pebA].						map00860	PF05996	Ferredoxin-dependent bilin reductase									MFDSLVDFLKTNIDQLNGHEVQISSEFKEHHNKDSKYIIKNWLFSSPEYRKWRITRLDGGKKLQVFNTVAYPNFDSEFPILGADILWFGTSQKLLAILDYQPLIQESKYLEKYCSSLGSIKKKYSAFDNNKMKNIYDSKKYFSPWVIICRGNKLNLDRDLNNIFHSFVNNYLNIYKSNPVNQFLNAEEIKINQIKYDKYSFEKDPADKLFKSFFGEKWTKKFINKFLFTLNNEIIY
	6038	GC_00000722	Bin_1	JFNG01	15	DETECTED				P	PIRSF000343	PIRSF000343	PR00088	Haem oxygenase signature			SSF48613	SSF48613			167546.P9301_17861	Heme oxygenase			G3DSA:1.20.910.10	G3DSA:1.20.910.10	COG5398	Heme oxygenase		map00860, map04978	PF01126	Heme oxygenase							Coil	Coil	MAVALAGQLREGTKKSHTMAENTGFVACFLKGVVEKKSYRKLISDLYFVYEAMEEEIERLVNEEHPVIKPIGFKSLFRKETLVNDLKFYFGENWKNEINISYSAKEYVERIREVAKNSPELLVGHHYTRYIGDLSGGQILKRIAKKALNLQGNDGLNFYEFELIADEKKFKEEYSLTLNQLPINQNTADQIIDEANQAFTYNMKMFKELEGNLIAVLGKIVFNYITKKVRKGSTET
	7386	GC_00000492	Bin_1	JFNG01	16	DETECTED				S																															MISISTSLLKEKVVNKQVKANYVIFKKNTQPFMNASSNVSNVEIANKIASTAALFRKYFPDASVNFSPWDNT-NESMQDTIDFAFHFPGWSPLIECRAILLQLRIENDSNDRVPKLLGIIMRGMIVPSERWRVATIGDWEMTGTHLPQKEQKDNLFLVCKELYKLFSTTSAGNKN
	9301	GC_00001088	Bin_1	JFNG01	17	DETECTED				C							SSF53659	SSF53659			167546.P9301_17881	isocitrate dehydrogenase (NADP)			G3DSA:3.40.718.10	G3DSA:3.40.718.10	COG0538	Isocitrate dehydrogenase		map00020, map00480, map00720, map01100, map01110, map01120, map01210, map01230, map04146	PF00180	Isocitrate/isopropylmalate dehydrogenase			TIGR00183	prok_nadp_idh: isocitrate dehydrogenase, NADP-dependent	PS00470	Isocitrate and isopropylmalate dehydrogenases signature.			MPKFEKLTLPSEGEIITFNQGKPNVPNNPIVPFIRGDGTGVDIWPATQIVLDSAIKKSYGNERKINWFKVYAGDEACELYGTYNYLPQDTIEAIRHFGVAIKGPLTTPIGGGIRSLNVALRQIFDLYSCVRPCKYYSGTPSPHKNPQNLDVIVYRENTEDIYMGIEWEAEDNNCLELINHLNNVVIPNSKNLKNRSIPNGSGIGIKPVSKSGSQRHIRKAIEHAKRLSGDKRHVTLVHKGNIMKYTEGAFRDWGYELAVNEFREDCITERESWILDNIHKNPEITIENNARKIEPGFDKLTNNKKAFICEEIKEVIASISNSHGDGKWRELILVDDRIADSIFQQIQTRPQEYSILATLNLNGDYVSDAAAAIVGGLGMAPGANIGDNAAIFEATHGTA…
	5737	GC_00001201	Bin_1	JFNG01	18	DETECTED				S							SSF142764	SSF142764			146891.A9601_18061	Type III effector Hrp-dependent					COG3395	Uncharacterized conserved protein YgbK, DUF1537 family			PF07005	Putative sugar-binding N-terminal domain									MKFVVIDDDPTGSQTVHDCLLLLKWDCSTLVKGFESKSNLFFILANTRSLSENDAESTIKEICKNLKNVITSQAYEEEIIFISRGDSTLRGHNYLEPIALNSCLGPFDATFHIPAFIEGKRLTINGAHFVDKTPISQTIFAKDKIFGYETSNVKKLLFQQSKSQINFEDIQNFLLSDIEMLNDEENNIVFKKLKNLKNNKHVIVDVENYSQLKKFSLVIKKLIKQKKFLFRTAASFVSSISDKKSFSQSEIFFSNLRIRNKENSFLPGLIIVGSYVELSTIQLNNLLEITNCNPVELDVFELFKITSSDNNQKRRNLFKNKFLKEIRFSFEKGKTPVLFTSRKFISLESSELFNFYNLLACFIAELVADLKYEIGYLISKGGITTNLILSNGLNADYVY…
	7580	GC_00001011	Bin_1	JFNG01	19	DETECTED				G							SSF74650	SSF74650			167546.P9301_17901	aldose 1-epimerase			G3DSA:2.70.98.10	G3DSA:2.70.98.10	COG2017	Galactose mutarotase or related enzyme		map00010, map01110, map01120	PF01263	Aldose 1-epimerase									MKLESSNKDQGIFVFQLDKNNYIKFCPKRGGVITNWVSEGNEILYFDEKRFMDKTKSIRGGIPILFPICGNLNNSSSVFGNGYLQLPQHGFARDSQWEYSFNENEKFLCLFLNASKKTKKYYPFDFELKIEVILKINFLEFKISIHNQTDFAMPINFGLHPYFNVSDFKNLEFIDNPLNCQDQERNTISNTLDELKKINLGVDLLMYTSGRSSFRDKIFKREVTLNHPYPFDLGVIWSDPPRRMICLEPWTSPRNSFVEGFRNIMIPSNDSQRLNASIQIKSLK
	5524	GC_00000779	Bin_1	JFNG01	20	DETECTED				S			PR00111	Alpha/beta hydrolase fold signature			SSF53474	SSF53474			74546.PMT9312_1691	alpha beta hydrolase superfamily protein			G3DSA:3.40.50.1820	G3DSA:3.40.50.1820	COG0596	Pimeloyl-ACP methyl ester carboxylesterase			PF12697	Alpha/beta hydrolase family									MEKSALIDNDVNYNWNFLNYPIHTVSAKPEQISKECAILLIHGFGASTDHWRFNIPVLSTKYEVHAMDLLGFGKSPKPQDVEYSGSLWKDQVVAYVKDKIKKPTIVVGNSLGGYAALAAGAELNELNAGVILLNAAGYFSEEKTIKKNMLQTSIETVAGIFLKNIVLQRLIFENMRNPKNIKKTLNQVYVDKKNVDDFLVESIRKPSLDFGAFNVFRSVFNPSGPQGLPLDKLFSKLNAPLLLLWGGKDPWMNTPKKRNLYKKFTPKNTKEIILDAGHCPHDEIPELVNQHILDWVDSL
	3665	GC_00000533	Bin_1	JFNG01	21	DETECTED				P											93060.P9215_18731	Na H antiporter					COG0475	Kef-type K+ transport system, membrane component KefB			PF00999	Sodium/hydrogen exchanger family									MYSLLAELSAHDLEVAETLIGVIRFLLIFLAARALAEVLVRLSLPTIVGELLAGVVIGASGFHLLIPPSAGTELNEGLVNVISSLASIPPEAVPDVYFESFPSLQAVATLGLYALLFLTGLESELEELVAVGAQAFTVAMAGVILPFAFGTLGLMFIFQVDLIPAVFAGASMTATSIGITASVFGELGYLKTREGQIVIGAAVLDDILGIVILAVVVALAAGGSLEIAPIVKLVAAAVVFVIAAIALSRTAAPGFDWLLDRLKAPGAVVVASFVILVLCCFVATAIGLEAALGAFAAGLILSSSKNNHAIQQSVLPLVSLFATIFFVLVGAGMDLSVINPLDPTSRSALVVAGFLLVVAIIGKIAAGWVFSSDKPTNRLVVGLGMMPRGEVGLIFLGLG…
	7316	GC_00000540	Bin_1	JFNG01	22	DETECTED				G	PIRSF000460	PIRSF000460					SSF53756	SSF53756			146891.A9601_18101	Phosphorylase is an important allosteric enzyme in carbohydrate metabolism. Enzymes from different sources differ in their regulatory mechanisms and in their natural substrates. However, all known phosphorylases share catalytic and structural properties (By similarity)			G3DSA:3.40.50.2000	G3DSA:3.40.50.2000	COG0058	Glucan phosphorylase		map00500, map01100, map01110, map04910	PF00343	Carbohydrate phosphorylase			TIGR02093	P_ylase: glycogen/starch/alpha-glucan phosphorylases	PS00102	Phosphorylase pyridoxal-phosphate attachment site.			------MANPMKSNEPFDLRLPTPGCYLDPEKAGMDSDAVFQGMTAHLFYTLGKLATSASPHDLYMALSYAVKDRLMTRYLASQEVIRKKPQKTVAYLSAEFLIGPQLSNNLLNLGITQEAEDALKRFGIESLSTILEVEEEPGLGNGGLGRLAACYMESLASLQVPAVGYGIRYEFGIFNQLIRDGWQVEVTDKWLKGGWPWELPQPDESCFVGFGGRTESYRDDKGNYRSRWIPSEHAIGVPHDVPVLGYRVNTCDRLRLWRADATESFDFYAFNIGDYYGAVEEKVASETLSKVLYPNDGTDEGRRLRLKQQHFFVSCSLQDMLRSLEKRSIPITEFPKHWTVQLNDTHPAIAVAELMRLLIDQYQIGWDKAWNITTSSVAYTNHTLLPEALEKWD…
	4093	GC_00000517	Bin_1	JFNG01	23	DETECTED				S																															MAEEQCQCSDCQRFYKEHDRLIREFPTFKQQQELNWASIQSFRTLCTKITDELQRELSERESNEDISPEDKHISDTEITEALDELESVNAYLYSIEALMERIFDTKISKNIESKFKEVANQLSPDPLNMDRLILNRIFHQTPDSPDKKNIN
	7899	GC_00000588	Bin_1	JFNG01	24	DETECTED				S																															-------MAKLHDMRLKLLIQQEHERISKSQPNDLDLSIVQARCLCWLALLAEAHEDQANDAEKRGDAEQAMGWFADSMRLRDVINLVTSIEIPLPDSPDSLDENDELLDGPTILPK-
	9268	GC_00000392	Bin_1	JFNG01	25	DETECTED		GO:0005575, GO:0005622, GO:0005623, GO:0005737, GO:0044424, GO:0044464		K					PS50137	Double stranded RNA-binding domain (dsRBD) profile.	SSF69065	SSF69065			74546.PMT9312_1696	Digests double-stranded RNA. Involved in the processing of primary rRNA transcript to yield the immediate precursors to the large and small rRNAs (23S and 16S). Also processes some mRNAs, and tRNAs when they are encoded in the rRNA operon (By similarity)	MF_00104	Ribonuclease 3 [rnc].	G3DSA:1.10.1520.10	G3DSA:1.10.1520.10	COG0571	dsRNA-specific ribonuclease		map03008, map05205	PF14622	Ribonuclease-III-like	SM00535	Ribonuclease III family							#NAME?
	916	GC_00000385	Bin_1	JFNG01	26	DETECTED				S																					PF11623	Protein of unknown function (DUF3252)									MELSTKPILPGSFVVVKDTDSIYRGYKGFVQRVTKKRAAVLFEGGNWDKLITFQLTNLEIV
	8801	GC_00000221	Bin_1	JFNG01	27	NOT DETECTED		GO:0005575, GO:0005622, GO:0005623, GO:0005737, GO:0044424, GO:0044464		J							SSF50447	SSF50447			167546.P9301_17981	An accessory protein needed during the final step in the assembly of 30S ribosomal subunit, possibly for assembly of the head region. Probably interacts with S19. Essential for efficient processing of 16S rRNA. May be needed both before and after RbfA during the maturation of 16S rRNA. It has affinity for free ribosomal 30S subunits but not for 70S ribosomes (By similarity)			G3DSA:2.40.30.60	G3DSA:2.40.30.60	COG0806	Ribosomal 30S subunit maturation factor RimM, required for 16S rRNA processing			PF01782	RimM N-terminal domain			TIGR02273	16S_RimM: 16S rRNA processing protein RimM					MINKKEWLTVGLITSCHGINGQVKVKSLSDFEERFLKPGIRWLQQANEPPSKIELESGFKQPGKEIFIVKFQGINTRNRAEQLKKFKILVKAETLPKLKKEEFHLLELVNLEVKTFEDDELKKIGKVINLENEKK--------------------------------------------
	8802	GC_00000221	Bin_1	JFNG01	28	DETECTED											SSF50346	SSF50346							G3DSA:2.30.30.240	G3DSA:2.30.30.240															#NAME?
	3732	GC_00001118	Bin_1	JFNG01	29	DETECTED		GO:0005575, GO:0005622, GO:0005623, GO:0005737, GO:0005886, GO:0008150, GO:0016020, GO:0040007, GO:0044424, GO:0044464, GO:0071944		M					PS51464	SIS domain profile.	SSF53697	SSF53697			167546.P9301_17991	Catalyzes the first step in hexosamine metabolism, converting fructose-6P into glucosamine-6P using glutamine as a nitrogen source (By similarity)	MF_00164	Glutamine--fructose-6-phosphate aminotransferase [isomerizing] [glmS].	G3DSA:3.60.20.10	G3DSA:3.60.20.10	COG0449	Glucosamine 6-phosphate synthetase, contains amidotransferase and phosphosugar isomerase domains		map00250, map00520, map01100, map01110	PF01380	SIS domain			TIGR01135	glmS: glutamine-fructose-6-phosphate transaminase (isomerizing)					MCGIVAVTGYKKALPLLINGLEKLEYRGYDSAGIAIINSENNCISCKKAEGKLNNLKSNLNNHNIPGTVGIGHTRWATHGKPEVKNAHPHTDSSGNIAVVQNGIIENFQDLKNKLEEEGIIFNSDTDTEVIPHLIQRELSNLNKLNLENNGSTLLVAVRNVLSDLEGSYALAVLWSGAPTSLVVARRQAPLIIGLGEGEFICASDTPAIANFTNIILPMEEDEIALLTPLGIEIYDSSNERQYRNPVSLKVSEQIMDKMNFKHYMLKEIYDQPQTAKNWLENYLIKSSDNGQYQINYPFDTEFFESIERIEIIACGTSKHAAMVGSFLLEQFSGIPTNVFFASEFRYSPPPLLPNTLTIGVTQSGETADTIAAIDMEIKRRSIIENEKFKPNLIAITNR…
	2534	GC_00000308	Bin_1	JFNG01	30	DETECTED		GO:0005575, GO:0005622, GO:0005623, GO:0005886, GO:0009579, GO:0016020, GO:0034357, GO:0042651, GO:0044424, GO:0044436, GO:0044464, GO:0071944		C					PS51379	4Fe-4S ferredoxin-type iron-sulfur binding domain profile.	SSF54862	SSF54862			146891.A9601_18171	essential for photochemical activity. FB is the terminal electron acceptor of PSI, donating electrons to ferredoxin. The C-terminus interacts with PsaA B D and helps assemble the protein into the PSI complex. Required for binding of PsaD and PsaE to PSI. PSI is a plastocyanin cytochrome c6- ferredoxin oxidoreductase, converting photonic excitation into a charge separation, which transfers an elec…	MF_01303	Photosystem I iron-sulfur center [psaC].	G3DSA:3.30.70.20	G3DSA:3.30.70.20	COG1145	Ferredoxin		map00195, map01100	PF13187	4Fe-4S dicluster domain			TIGR03048	PS_I_psaC: photosystem I iron-sulfur protein PsaC	PS00198	4Fe-4S ferredoxin-type iron-sulfur binding region signature.			MSHAVKIYDTCIGCTQCVRACPLDVLEMVPWDGCKAGQIASSPRTEDCVGCKRCETACPTDFLSIRVYLGDETSRSMGLAY
	4990	GC_00000626	Bin_1	JFNG01	31	DETECTED		GO:0000036, GO:0003674, GO:0005488, GO:0005575, GO:0005622, GO:0005623, GO:0005737, GO:0006082, GO:0006629, GO:0006631, GO:0006633, GO:0008150, GO:0008152, GO:0008610, GO:0009058, GO:0009987, GO:0016053, GO:0019752, GO:0032787, GO:0043436, GO:0044237, GO:0044238, GO:0044249, GO:0044255, GO:0044281, GO:0044283, GO:0044424, GO:0044464, GO:0044620, GO:0044710, GO:0044711, GO:0046394, GO:0048037, GO:…		I					PS50075	Acyl carrier protein phosphopantetheine domain profile.	SSF47336	SSF47336	PD000887	CARRIER ACYL PHOSPHOPANTETHEINE ACP ACID FATTY BIOSYNTHESIS LIPID SYNTHESIS CHLOROPLAST	146891.A9601_18181	Carrier of the growing fatty acid chain in fatty acid biosynthesis (By similarity)	MF_01217	Acyl carrier protein [acpP].	G3DSA:1.10.1200.10	G3DSA:1.10.1200.10	COG0236	Acyl carrier protein			PF00550	Phosphopantetheine attachment site			TIGR00517	acyl_carrier: acyl carrier protein	PS00012	Phosphopantetheine attachment site.			MSQEILEKVCSIVSEQLSVETGEVKSDSNFQNDLGADSLDTVELVMALEEAFDIEIPDEAAEGIATVGDAVKFIEEKKG
	6388	GC_00000361	Bin_1	JFNG01	32	DETECTED				I	PIRSF000447	PIRSF000447					SSF53901	SSF53901			146891.A9601_18191	Catalyzes the condensation reaction of fatty acid synthesis by the addition to an acyl acceptor of two carbons from malonyl-ACP (By similarity)			G3DSA:3.40.47.10	G3DSA:3.40.47.10	COG0304	3-oxoacyl-(acyl-carrier-protein) synthase		map00061, map00780, map01100	PF00109	Beta-ketoacyl synthase, N-terminal domain	SM00825	Beta-ketoacyl synthase	TIGR03150	fabF: beta-ketoacyl-acyl-carrier-protein synthase II	PS00606	Beta-ketoacyl synthases active site.			MPNFHRVVITGIGAVTPIGNNIDEYLVGLQTGTNGVSDITLFDPEQHPCKFAAEVKNLQSENFIEAKESKRWDRFSQFGVIAAKQAFNDSGLEITEANASRIGVIIGSGVGGLLTMESQAQILSHKGPKRVSPFTVPMMIPNMATGLAAIALGAKGPSSSVSTACAAGSNAIGDSFRLLQLGKADAMICGGAEASITPLGVAGFASAKALSSRNESPQTASRPFDAERDGFVIGEGSGILVLETLENAQKRNARIYAEIIGYGTTCDAHHITAPSPGGIGGAEAIKLAIEDACLSPEKVDYINAHGTSTSANDKNETSAIKSIFKDRSYLIPVSSTKSMTGHLLGGSGGIEAVACILSLTHNFIPPTINYVNRDPECDLDYVPNNAREAQVGVALSNSF…
	6177	GC_00000571	Bin_1	JFNG01	33	DETECTED		GO:0003674, GO:0003824, GO:0004802, GO:0005488, GO:0005975, GO:0005996, GO:0006006, GO:0006007, GO:0006091, GO:0006098, GO:0006139, GO:0006725, GO:0006732, GO:0006733, GO:0006739, GO:0006740, GO:0006753, GO:0006793, GO:0006796, GO:0006807, GO:0008150, GO:0008152, GO:0009052, GO:0009056, GO:0009117, GO:0009987, GO:0016052, GO:0016740, GO:0016744, GO:0019318, GO:0019320, GO:0019321, GO:0019362, GO:…		G							SSF52518	SSF52518			146891.A9601_18201	Transketolase (EC 2.2.1.1)			G3DSA:3.40.50.970	G3DSA:3.40.50.970	COG0021	Transketolase		map00030, map00710, map01051, map01100, map01110, map01120, map01230	PF00456	Transketolase, thiamine diphosphate binding domain	SM00861	Transketolase, pyrimidine binding domain	TIGR00232	tktlase_bact: transketolase	PS00801	Transketolase signature 1.			MVAASVSLESLCVNSIRMLAVDAVNKSNSGHPGLPMGCAPMGYALWQNILNHNPNNPKWFNRDRFVLSAGHGCMLLYSLLHLTGYKSVSIEDIKEFRQWGSKTPGHPETFETEGVEVTAGPLGAGISNAVGLAIAETHLAAKFNKPDCNIVDHYTYVIMGDGCNQEGIASEACSLAGHLKLGKLIALYDDNQITIDGRTDVSFTEDVLKRYEAYGWHVQHVEDGNHDVKGITEAIEKAKLITDKPSIIKISTTIGYGSPNKSDTAGIHGAAVGEEEAALTREFLNWEYPPFEIPDEVYSHFRKSINKGENLEQEWDSKFEEYQKKYPSEGAELKRMLEGQLPENWDSDLPSYSPNDKGLATRKHSQICLGALGPNLPELIGGSADLTHSNYTDIKGETG…
	9351	GC_00000472	Bin_1	JFNG01	34	DETECTED				H											146891.A9601_18211	Catalyzes the synthesis of the hydroxymethylpyrimidine phosphate (HMP-P) moiety of thiamine from aminoimidazole ribotide (AIR) in a radical S-adenosyl-L-methionine (SAM)-dependent reaction (By similarity)	MF_00089	Phosphomethylpyrimidine synthase [thiC].			COG0422	Thiamine biosynthesis protein ThiC		map00730, map01100	PF01964	Radical SAM ThiC family			TIGR00190	thiC: phosphomethylpyrimidine synthase					MRSSWIKPRLGKDNVTQMNFARNGYITEEMDFVAKKENLPSSLIMEEVARGRLIIPANINHLNLEPMSIGIASRCKVNANIGASPNASDINEEVEKLKLAVKYGADTVMDLSTGGVNLDEVRQAIIQESPVPIGTVPVYQALESVHGSIDRLTEDDFLHIIEKHCQQGVDYQTIHAGLLIEHLPKVKGRITGIVSRGGGILAQWMLHHFKQNPLYTRFDDICEIFKKYDCTFSLGDSLRPGCLHDASDDAQLAELKTLGELTRRAWEHNVQVMVEGPGHVPMDQIEFNVRKQMEECSEAPFYVLGPLVTDISPGYDHISSAIGAAMAGWYGTSMLCYVTPKEHLGLPNAEDVREGLIAYKIAAHAADIARHRAGARDRDDELSHARYNFDWNKQFELSL…
	2433	GC_00000369	Bin_1	JFNG01	35	DETECTED																									PF11384	Protein of unknown function (DUF3188)									MKINKRFILSFVAPFMIFISAIGLIFRDNSKKIFYLPIGLMGIVIILERGMSRQLDRKNILKKIKSYQKNK
	2655	GC_00000656	Bin_1	JFNG01	36	DETECTED				E	PIRSF005962	PIRSF005962					SSF53187	SSF53187			146891.A9601_18231	amidohydrolase			G3DSA:3.40.630.10	G3DSA:3.40.630.10	COG1473	Metal-dependent amidase/aminoacylase/carboxypeptidase			PF01546	Peptidase family M20/M25/M40			TIGR01891	amidohydrolases: amidohydrolase			Coil	Coil	MNRDQLHKKIDSFNDELINLRRHIHEHPELSGLENQTAILISGFLKDIGWNVRESIGRTGVIADFGPLDKGIIGLRVDMDALPIFEETKLSFSSKVDGVMHACGHDLHISIGLGVAKIIKDLKLNFGTRIIFQPAEEIASGARWMIKDGATNGLTHIFGVHVYPDLSVGTIGIKEGSLTAAAGELNVEIKGKSGHGARPHEGVDAIWAASKVISGIQESITRKLDPLDPVVITFGKINGGNAFNVLAEKVNLIGTVRCTNRKVFMNIGNWLNENITSLASSCGAEAKVIFREITSAVNNNPEMNRVLRDSGIKVLGQENVIELQKPSLGAEDFAEFLNEIPGAMFRLGVSSSNGCAPLHSSKFDPDERAIAVGIKVITESIVKLNNEIINTIGK
	4414	GC_00001167	Bin_1	JFNG01	37	DETECTED				S					PS50005	TPR repeat profile.	SSF48452	SSF48452			146891.A9601_18241	tpr repeat-containing protein			G3DSA:1.25.40.10	G3DSA:1.25.40.10					PF13414	TPR repeat	SM00028	Tetratricopeptide repeats					Coil	Coil	MITFKKVKVCFLLIFIFFNIFYIAPCYSLSSREDLFKNALDLSSGGKFNLALQEWNQYLDSYPDDAAGFSNRGNVRLVVGDFKGSIDDQNKAISLNPSEIDPYINRGIAEEALGLWSQAKKDYMFVISLDSKNFSALYNLANVEGSTSHWDKARDLFSKAALYNPGFAMARSSLALADFQLGNIDEAEKELIKLIRRYPTFADARAALTALSWSNGEAGKAESNWIAVTELDPRYSDEEWLKKIRRWPPQPIKDLMNFIDLK
	3578	GC_00000552	Bin_1	JFNG01	38	DETECTED		GO:0000725, GO:0003674, GO:0003678, GO:0003824, GO:0004386, GO:0005575, GO:0005622, GO:0005623, GO:0005737, GO:0006139, GO:0006259, GO:0006281, GO:0006310, GO:0006725, GO:0006807, GO:0006950, GO:0006974, GO:0007154, GO:0008150, GO:0008152, GO:0009378, GO:0009432, GO:0009605, GO:0009987, GO:0009991, GO:0016462, GO:0016787, GO:0016817, GO:0016818, GO:0017111, GO:0031668, GO:0032392, GO:0032508, GO:…		L							SSF52540	SSF52540	PD005323	DNA HELICASE HOLLIDAY JUNCTION RUVB NUCLEOTIDE-BINDING ATP-BINDING SOS RECOMBINATION RESPONSE	146891.A9601_18251	The RuvA-RuvB complex in the presence of ATP renatures cruciform structure in supercoiled DNA with palindromic sequence, indicating that it may promote strand exchange reactions in homologous recombination. RuvAB is a helicase that mediates the Holliday junction migration by localized denaturation and reannealing (By similarity)	MF_00016	Holliday junction ATP-dependent DNA helicase RuvB [ruvB].	G3DSA:3.40.50.300	G3DSA:3.40.50.300	COG2255	Holliday junction resolvasome RuvABC, ATP-dependent DNA helicase subunit		map03440	PF05496	Holliday junction DNA helicase ruvB N-terminus	SM00382	ATPases associated with a variety of cellular activities	TIGR00635	ruvB: Holliday junction DNA helicase RuvB					MAIISSNIGDNDFSFRKKELRLVDSKNIPEEKRNNNLNLARPLNLKEFIGQEQLKSSLRVAIDASIIRKEPLEHTLLYGQPGLGKTTLAFLIAHELNTKCRIATAPAIERPRDIVGLLLGLKEGEVLFIDEIHRLNRLTEELLYSAMEDFRLDLTMGANRGARCRTINLPRFTLIGATTKLASISAPLRDRFGISQKIEFYTCDELKQIIVNFSRLINLNLEDEASYDLAKISRGTPRIALRLLRRVRDYAQVVMKTNTISVNLIKKALNSYQIDEKGLDSLDRHYLSFLNQNNNIPTGLDSIASGLGDDSSMLEFVVEPYLIKIGFLRRTPRGRLLTALGKKYIDSKDDNF
	6252	GC_00000481	Bin_1	JFNG01	39	DETECTED		GO:0003674, GO:0003676, GO:0003723, GO:0005488, GO:0005575, GO:0005622, GO:0005623, GO:0005737, GO:0005829, GO:0006464, GO:0008150, GO:0008152, GO:0009987, GO:0019538, GO:0036211, GO:0043170, GO:0043412, GO:0044237, GO:0044238, GO:0044260, GO:0044267, GO:0044424, GO:0044444, GO:0044464, GO:0070930, GO:0071704, GO:0097159, GO:1901363		O							SSF74982	SSF74982	PD004488	SSRA-BINDING RNA-BINDING SMPB SMALL B TMRNA-BINDING SSRA 3D-STRUCTURE HOMOLOG BINDING	146891.A9601_18261	Binds specifically to the SsrA RNA (tmRNA) and is required for stable association of SsrA with ribosomes (By similarity)	MF_00023	SsrA-binding protein [smpB].	G3DSA:2.40.280.10	G3DSA:2.40.280.10	COG0691	tmRNA-binding protein			PF01668	SmpB protein			TIGR00086	smpB: SsrA-binding protein	PS01317	SsrA-binding protein.			MAKNSNKIKKNTNKANNFKLLADNRYAKFQYAISETIEAGIELLGTEVKSIRNGKANLRDGYCSFRDGEILLLNVHISPHKNVGSYFNHDPLRNRKLLLHKKEIIKMKSNTEKKGMTIVPLSLYLKGSWIKLTIGVGKGKKLHDKRQDEKQKSIKKEINSALKR
	9415	GC_00000319	Bin_1	JFNG01	40	DETECTED				S																															MSGERVGFRFKHADAVVKRNPQGRSRRGWVIEPVEQTTSRGTKMPAYKIRWRDSERPETVLQHMLIADPDPSPPPTSVSLD
	6733	GC_00000970	Bin_1	JFNG01	41	DETECTED		GO:0003674, GO:0003824, GO:0004812, GO:0004824, GO:0005575, GO:0005622, GO:0005623, GO:0005737, GO:0005886, GO:0006082, GO:0006139, GO:0006399, GO:0006412, GO:0006418, GO:0006430, GO:0006520, GO:0006725, GO:0006807, GO:0008150, GO:0008152, GO:0009058, GO:0009059, GO:0009987, GO:0010467, GO:0016020, GO:0016070, GO:0016874, GO:0016875, GO:0016876, GO:0019538, GO:0019752, GO:0034641, GO:0034645, GO:…		J	PIRSF039101	PIRSF039101	PR00982	Lysyl-tRNA synthetase signature	PS50862	Aminoacyl-transfer RNA synthetases class-II family profile.	SSF55681	SSF55681			146891.A9601_18281	lysyL-tRNA synthetase	MF_00252	Lysine--tRNA ligase [lysS].	G3DSA:3.30.930.10	G3DSA:3.30.930.10	COG1190	Lysyl-tRNA synthetase (class II)		map00970	PF00152	tRNA synthetases class II (D, K and N)			TIGR00499	lysS_bact: lysine--tRNA ligase					MSEIKEARLQKASSLVNKGFASYAQSFNVSHTTSFLIQKFDHLENGQEEEFSVSIAGRVLAKRVMGKIAFFTISDQEGQIQLYLDKRIINFNLEKQKLLSFEDLKEIVDIGDWIGVYGTIKKTNKGELSIKVEKWEMLSKSLQPLPDKWHGLTDIEKRYRQRYLDLIVNPHSKNVFKTRAKCISFIRKWLDNRNFLEIETPILQSEAGGAEARPFITHHNTLDIPLYLRIATELHLKRMVVGGFEKVYELGRIFRNEGISTRHNPEFTSVEIYEAYSDYVDMMNLTEELIKDIVADACGSLTINYQNKEIDFSKPWSRISMKAIVKKYTGIDFDSFSGDFLAAKQAVKNINVDCSNKVNTMGRLLNEVFEQKVESKLIEPTFVIDYPVEISPLARPHHD…
	9432	GC_00000448	Bin_1	JFNG01	42	DETECTED				T					PS51755	OmpR/PhoB-type DNA-binding domain profile.	SSF52172	SSF52172			146891.A9601_18291	two-component response regulator			G3DSA:3.40.50.2300	G3DSA:3.40.50.2300	COG0745	DNA-binding response regulator, OmpR family, contains REC and winged-helix (wHTH) domain		map02020	PF00072	Response regulator receiver domain	SM00448	cheY-homologous receiver domain							MFNAIVLCFEISRNLFLTMSKARILVVDDEPAVLKVLVTRLQLAGYQVYSATNGEEALDSFHRDSPDLIVLDVMLPKMDGFAVCRRIRAESVVPIIFLTALEAISERVAGLDLGADDYLSKPFSPKELEARIATILRRMGPTVSVTETKEVPSGKGVMKFGSLVVDTNRRQVSRAGDRISLTYTEFSLLELLFDEPGKVVPRAEILEQLWGYPPRRAADLRVVDVYVARLRGKLEPDPRNPELILTVRGIGYASQRVGETATSLAS
	6056	GC_00000882	Bin_1	JFNG01	43	DETECTED				S																															MNKFFTKKFSIISFIFIPIIFLWHPNWLGFLGVQPYWPLFWLLPWAMINGSINGLVFGLFLGLILDSLTLNESFTQIPGLIFCGFFFGRIKSHSDILVGHFRYGLICSFGSFLCGTLYLAQILFRNSSDGNFLMFIPGVKNILAEVFLTGLFAPFICSQLIRMFKFSRRKM--------
	2101	GC_00000671	Bin_1	JFNG01	44	NOT DETECTED				M											146891.A9601_18311	Rod shape-determining protein					COG1792	Cell shape-determining protein MreC			PF04085	rod shape-determining protein MreC			TIGR00219	mreC: rod shape-determining protein MreC					MLGIRRISNSRWWHKKKNWLFFAIFLFLVFVRISKGAFYKDFYYFISKPFWPGQFQKEIVLESIDQEYLIKLNLLTKDNIRLRQILSLQESSNDKHISAAVISRKTGGWWRQIILNKGSKDGVEIGNIVIGPGGLLGRVKNTSLFTSSVTLITSPESKLGVWVDRIQINGLLVGLGDDYPSLILYSKDADIKVGDFVSSSPASTLLPPNIPIGIVQSIDETLKSRKTAKISLIAKPHVIDWVQILKVNI
	7284	GC_00000422	Bin_1	JFNG01	45	DETECTED		GO:0000003, GO:0000910, GO:0005575, GO:0005618, GO:0005623, GO:0007049, GO:0008150, GO:0008360, GO:0009274, GO:0009276, GO:0009987, GO:0019954, GO:0022402, GO:0022603, GO:0022604, GO:0030312, GO:0030313, GO:0031975, GO:0032505, GO:0043093, GO:0044464, GO:0044699, GO:0044763, GO:0050789, GO:0050793, GO:0050794, GO:0051128, GO:0051301, GO:0065007, GO:0065008, GO:0071944		D			PR01652	Bacterial cell shape determinant MreB/Mbl protein signature			SSF53067	SSF53067			146891.A9601_18321	Rod shape-determining protein mreb			G3DSA:3.30.420.40	G3DSA:3.30.420.40	COG1077	Actin-like ATPase involved in cell morphogenesis			PF06723	MreB/Mbl protein			TIGR00904	mreB: cell shape determining protein, MreB/Mrl family					MIFNRFKFSRDIGIDLGTANTLIHVSGKGVVLQEPSVVAMDLEEGIPLAVGKEAKLMLGRTPGNIRAVRPLRDGVIADFDAAEQMIKTFIQKCNEGKGIVAPRIVIGIPSGVTSVERRAVREAGLAGAREVHLIDEPVAAAIGASLPVTEPIGTMIVDIGGGTTEVAVLSLGGTVLSESVRIAGDEINESIALYLKKVHNLVVGERTAEDIKIKIGSAFPDDDFDKTTLEVRGLHLLSGLPRSVTLTSGEIREAMAETLSKIVEAVKRTLERTPPELAADIVDRGIMLAGGGALVRGINDLLSDETGIFTHIAENPLLCVVNGCGEVLDDFKTLKRVVDTPEFIRNAIRD
	8316	GC_00000349	Bin_1	JFNG01	46	DETECTED				L	PIRSF002070	PIRSF002070			PS50935	Single-strand binding (SSB) domain profile.	SSF50249	SSF50249			146891.A9601_18331	single-stranded DNA-binding protein	MF_00984	Single-stranded DNA-binding protein.	G3DSA:2.40.50.140	G3DSA:2.40.50.140	COG0629	Single-stranded DNA-binding protein		map03030, map03430, map03440	PF00436	Single-strand binding protein family			TIGR00621	ssb: single-stranded DNA-binding protein					MEINTINLVGRAGREPDVRYFESGSIVANFTIAVNRRSRDEEPDWFNLEIWGKQAQIAADYVKKGSLIGITGSFKIDSWKDKNTGEDRFKPVVRVDRLNLLGSRKDSDNNQYSNSNNSSEIPF
	3073	GC_00001111	Bin_1	JFNG01	47	DETECTED				S											146891.A9601_18341	alkaline phosphatase-like protein					COG0586	Uncharacterized membrane protein DedA, SNARE-associated domain		map00627, map00790, map01100, map01120, map02020	PF09335	SNARE associated Golgi protein									#NAME?
	1920	GC_00000147	Bin_1	JFNG01	48	DETECTED		GO:0000096, GO:0000098, GO:0000166, GO:0003674, GO:0003824, GO:0004013, GO:0005488, GO:0005575, GO:0005576, GO:0005618, GO:0005622, GO:0005623, GO:0005737, GO:0005829, GO:0005886, GO:0006082, GO:0006139, GO:0006461, GO:0006520, GO:0006555, GO:0006725, GO:0006790, GO:0006807, GO:0008150, GO:0008152, GO:0009056, GO:0009063, GO:0009066, GO:0009068, GO:0009087, GO:0009116, GO:0009119, GO:0009987, GO:…		H	PIRSF001109	PIRSF001109					SSF52283	SSF52283			146891.A9601_18351	May play a key role in the regulation of the intracellular concentration of adenosylhomocysteine (By similarity)	MF_00563	Adenosylhomocysteinase [ahcY].	G3DSA:3.40.50.1480	G3DSA:3.40.50.1480	COG0499	S-adenosylhomocysteine hydrolase		map00270, map01100	PF05221	S-adenosyl-L-homocysteine hydrolase	SM00996	S-adenosyl-L-homocysteine hydrolase	TIGR00936	ahcY: adenosylhomocysteinase	PS00738	S-adenosyl-L-homocysteine hydrolase signature 1.			MYLPDMVIANSVKTSTPNYVIADISLSDFGRKEIKIAETEMPGLMALRDKYQSEKPLKGAKIAGSLHMTIQTAVLIETLVDLGAEVKWASCNIFSTQDHAAAAIADQGIPVYAKKGETLDEYWQYTHYILDWGSDSPNMILDDGGDATGLLILGSKAEKDLSVLDNPGNEEEIALFNSIKSKLENDSDFYSRIKSNIIGVTEETTTGVARLYQLQKQNALPFPAINVNDSVTKSKFDNLYGCRESLVDSIKRATDVMIAGKVALVMGFGDVGKGSAQSLRGLGAIVKVAEVDPICALQAAMEGFSVVTLDDVVEDIDIFVTATGNYQVITNENLVKMKDEAIVCNIGHFDNEIDVASLKDYPWENIKPQVDHITLPSGNKIILLAEGRLVNLGCATGHP…
	5187	GC_00000872	Bin_1	JFNG01	49	DETECTED		GO:0005575, GO:0005622, GO:0005623, GO:0005737, GO:0044424, GO:0044464		S							SSF52540	SSF52540			146891.A9601_18361	protein family UPF0079, ATPase			G3DSA:3.40.50.300	G3DSA:3.40.50.300	COG0802	tRNA A37 threonylcarbamoyladenosine biosynthesis protein TsaE			PF02367	Threonylcarbamoyl adenosine biosynthesis protein TsaE			TIGR00150	T6A_YjeE: tRNA threonylcarbamoyl adenosine modification protein YjeE					MFVENLKETLNLGKKLSHKLNPQSIVLLKGPIGAGKTSFVQGIAKGLSISEDITSPTFALSHHYNSGKIPLIHLDLYRLGNVSSAKEVFFSEEEEAIQRQAILVIEWPELIEPVIDNFWKIEISYAKDYGRNYEIRDPKNLLTFS
	6910	GC_00000276	Bin_1	JFNG01	50	DETECTED				G							SSF53613	SSF53613			441768.ACL_0413	pfkB family carbohydrate kinase			G3DSA:3.40.1190.20	G3DSA:3.40.1190.20	COG0524	Sugar or nucleoside kinase, ribokinase family		map00051, map00500, map00520, map01100	PF00294	pfkB family carbohydrate kinase					PS00584	pfkB family of carbohydrate kinases signature 2.			MKKKKVI-CIGEALI-DRIRNKSNKGFTDFLGGAPANVACALRKLKIDSIFMGSLGNDDYGKKFISQFDQLGVNLDFLQLNNDSSTRVVNVDRDQFGDRFFSGFEESSHACYADEVLSKKLIEKEILNLEKSFLEIKYLVTGTNLLSSPISAETIFFLIEQANKFEVKIVIDLNWREVFWDHASFSSEISKAARVNLIKNFLNHANVLKLAKEEAILFFEDENPLLISQRLSNRPDVIITDGKNPVLWSINGFQGITETPSSQKIVDTTGAGDAFLAGFISKLISSGYPTNDLEIEDCIKFAGVCGLLTCLGEGAIEQQPYYEKVNKFLGSLIS--
	599	GC_00000721	Bin_1	JFNG01	51	DETECTED				S							SSF53474	SSF53474			167546.P9301_18201	Alpha beta hydrolase			G3DSA:3.40.50.1820	G3DSA:3.40.50.1820					PF12697	Alpha/beta hydrolase family									MSFNKSETWKWKNWEISWSLSKESTSEKNIKILLVHGFGASKNHWRHNQDFLGKFSSCYAIDLLGFGESSQPSALLNYEPDKVNSIKYSFDLWGNQISTFCAEVIKSPVYLVGNSIGGVIALKAAEILKDNCKGIILIDCAQRTMDDKRLKKSDILMNLLRPVLKTIVRQRVISNTLFTRAANPKVIKKILEQAYPSGKNIDKELIEILYQPSQRKNSKEAFRGFINLFDDYLATDLFPKVDSPIQLIWGEEDPWESLNEAIEWKKLFSNIKRLDIIKGAGHCPHDEEPEKTNKLINEFIQETK
	1890	GC_00000456	Bin_1	JFNG01	52	DETECTED				K			PR00046	Major sigma-70 factor signature			SSF88946	SSF88946			93060.P9215_19031	Sigma factors are initiation factors that promote the attachment of RNA polymerase to specific initiation sites and are then released (By similarity)			G3DSA:1.10.601.10	G3DSA:1.10.601.10	COG0568	DNA-directed RNA polymerase, sigma subunit (sigma70/sigma32)		map05111	PF04542	Sigma-70 region 2			TIGR02997	Sig70-cyanoRpoD: RNA polymerase sigma factor, cyanobacterial RpoD-like family	PS00715	Sigma-70 factors family signature 1.			MVLFTKHHSTFMSSETISENKLTSIASIKSSNDVDLVRSYLRDIGRVPLLSHEQEITLGRQVQEYMEVERKELEIIELTGDKPSIDELSTKLNLSSSIIKKRLRAGQRAKERMVAANLRLVVSVAKKYTKRNMELLDLIQEGTIGLVRGVEKFDPARGYKFSTYAYWWIRQGITRAIAEKSRAIRLPIHITEMLNKLKKGQRELSQEMSRTPTVSELAKYVELPEDDVKDLMCKAGQPVSLETKVGDGEDTVLLDLLAGGEDLPDEQIEMDCMRGDLHSLLHQLPDLQCRVLRMRYGMDGDEPMSLTGIGRVLGISRDRVRNLERDGLRGLRRLSDNVEAYFVS
	2272	GC_00000383	Bin_1	JFNG01	53	DETECTED				P					PS51371	CBS domain profile.	SSF161093	SSF161093			167546.P9301_18221	magnesium transporter			G3DSA:1.10.357.20	G3DSA:1.10.357.20	COG2239	Mg/Co/Ni transporter MgtE (contains CBS domain)			PF01769	Divalent cation transporter	SM00924	MgtE intracellular N domain	TIGR00400	mgtE: magnesium transporter					MNENNLETVTSLSSDLSTRENITIQLEELLIAGNYDEAKLLLEPSQPVDIADAIGSLPLILQALAFRLLKKNEAIEVYEYLDPVVQQTLLERLRSGEVLEIVEKMSPDDRVQLFDELPAKVVRKFLSALSPGERKVTAELLGYEPETAGRLMTTEFIDLKEMQTAADALSIVRKRAPFTETIYSLYVTDKERHLTGILSLRDLVTADPSKPIGDVMTRDVVNISTNTNQEEVARAIQRYDFLALPVVDKEKRLVGIVTVDDLIDVIEQEATRDIYAAGAVQPGDEDDYFQSSLFTIARRRILWLLILVLANGLTTKVIAMNDQILKEIVLLAAFIPLLIGTGGNVGAQSSTVVIRGLSTQKLKSLGAIKAVVKEAITGALLGIFMMLVVFPFAWWQGEG…
	2593	GC_00001794	Bin_1	JFNG01	54	DETECTED																	MF_00454	Putative fluoride ion transporter CrcB [crcB].							PF02537	CrcB-like protein, Camphor Resistance (CrcB)									MDFSSISIILLGSTFGLILRIFIQNKFKKSIGFDIQNTSIVNFLASFLLGILVALNFINNEILVLFYSGFLGCFSTFSSFIYQLFILFKKRKFLRLFFHYIEVIIFSFLFFYLGYFLIQFF
	5696	GC_00000939	Bin_1	JFNG01	55	DETECTED				S																															MINNVLKNFCLITFALIAPITLPAGGIQKSLNQNKFPNSTNEIILCSNTSLYSCPEIYARELLVLDVGTTLSVLRNWEVSNNENWVRVELASNKLLDDPNKILKGWIKM
	3338	GC_00000047	Bin_1	JFNG01	56	DETECTED		GO:0000166, GO:0000287, GO:0001882, GO:0001883, GO:0003674, GO:0003824, GO:0003916, GO:0003918, GO:0005488, GO:0005524, GO:0005575, GO:0005618, GO:0005622, GO:0005623, GO:0005737, GO:0005886, GO:0006139, GO:0006152, GO:0006163, GO:0006195, GO:0006200, GO:0006259, GO:0006260, GO:0006261, GO:0006265, GO:0006725, GO:0006753, GO:0006793, GO:0006796, GO:0006807, GO:0007059, GO:0008094, GO:0008150, GO:…		L			PR00418	DNA topoisomerase II family signature	PS50880	Toprim domain profile.	SSF56719	SSF56719			167546.P9301_18251	DNA gyrase negatively supercoils closed circular double- stranded DNA in an ATP-dependent manner and also catalyzes the interconversion of other topological isomers of double-stranded DNA rings, including catenanes and knotted rings (By similarity)	MF_01898	DNA gyrase subunit B [gyrB].	G3DSA:3.40.50.670	G3DSA:3.40.50.670	COG0187	DNA gyrase/topoisomerase IV, subunit B			PF00204	DNA gyrase B	SM00433	TopoisomeraseII	TIGR01059	gyrB: DNA gyrase, B subunit	PS00177	DNA topoisomerase II signature.			MSEDKRSNKISNDYGAEQIQVLEGLEPVRKRPGMYIGSTGPRGLHHLVYEVVDNSVDEALAGHCDHIEIVLRADGSALISDNGRGIPTDIHPRTGKSALETVLTVLHAGGKFGSGGYKVSGGLHGVGISVVNALSEWVNVTVYRDGSEFNQRFEKGVSKGELETKKQTGKPSKKGTTICFKPDKTIFSGGIEFEYALLSSRLRELAYLNGGVKIVFRDERNQLSDGSFKEEIYLYQGGIKEYVEYMNAEKDSIHPEIIYVDSQKENVYVEAALQWCSDVYSDNILGFANNIRTIDGGTHIEGLKSVLTRTFNNLAKKRGKRKDIEKNLAGENIREGLTVVLSVKVPDPEFEGQTKTKLGNTEVRGIVDSLIGEALTKYMEFNPGILDLILEKAIQSFNA…
	763	GC_00000059	Bin_1	JFNG01	57	DETECTED				J							SSF52540	SSF52540			167546.P9301_18261	Catalyzes the transfer of a dimethylallyl group onto the adenine at position 37 in tRNAs that read codons beginning with uridine, leading to the formation of N6-(dimethylallyl)adenosine (i(6)A) (By similarity)	MF_00185	tRNA dimethylallyltransferase [miaA].	G3DSA:3.40.50.300	G3DSA:3.40.50.300	COG0324	tRNA A37 N6-isopentenylltransferase MiaA		map00908, map01100, map01110	PF01715	IPP transferase			TIGR00174	miaA: tRNA dimethylallyltransferase					MSSYLPHVIILIGPTASGKTELAIEIAEYFKTHIHNIDSRQIYKSMDIGTAKPSKIQQKKIKHFLIDIEDPINPINVKQFQEIAQKSIKREIKQDNLPFLVGGSGLYMNSITKGFFVPDVPPQNNLRRQLEELGQEKCWELLKNCDPLSTKKINFADHIRTIRALEVFYVTGKPLSSLKGQKPPNWKILELGLDRDNLKERIFQRTKNMFLSGIIEETKHLISEYGFDLPILETIGYREARDVLNNHLTIDKAIELTTTKTIQFAKRQKTWFRNKNNPLWLNDKNLLKDAIIKIESFLS
	2866	GC_00000172	Bin_1	JFNG01	58	DETECTED		GO:0005575, GO:0005622, GO:0005623, GO:0005737, GO:0044424, GO:0044464		J							SSF55200	SSF55200			146891.A9601_18461	IF-3 binds to the 30S ribosomal subunit and shifts the equilibrum between 70S ribosomes and their 50S and 30S subunits in favor of the free subunits, thus enhancing the availability of 30S subunits on which protein synthesis initiation begins (By similarity)	MF_00080	Translation initiation factor IF-3 [infC].	G3DSA:3.30.110.10	G3DSA:3.30.110.10	COG0290	Translation initiation factor IF-3			PF00707	Translation initiation factor IF-3, C-terminal domain			TIGR00168	infC: translation initiation factor IF-3	PS00938	Initiation factor 3 signature.	Coil	Coil	MPPRPRFDRRAPVRELPNINERIKYPQLRVVDSDGKQLGVIDRLKALEIASQRELDLVLVSEKANPPVCRIMDYGKYKFEQEKKAKEARKKSHQTEVKEVKMRYKIDKHDYDVRIGQATKFLKSGDKVK---CTVMFRGREIQHSNLAETLLLKMANDLEEQSEVQQKPKREGRNMIMFLSPRKTPLIKKDDG
	5354	GC_00000302	Bin_1	JFNG01	59	DETECTED				K			PR00035	GntR bacterial regulatory protein HTH signature	PS50949	GntR-type HTH domain profile.	SSF46785	SSF46785			167546.P9301_18281	TRANSCRIPTIONAl REGULATOR GntR family			G3DSA:1.10.10.10	G3DSA:1.10.10.10	COG1725	DNA-binding transcriptional regulator YhcF, GntR family			PF00392	Bacterial regulatory proteins, gntR family	SM00345	helix_turn_helix gluconate operon transcriptional repressor							MRFHIQQDSDIPASTQLNNQICFAIAARHFPPGHRLPSTRQLAMQTGLHRNTISKVYRQLEIDGVVEAIAGSGIYVRDNLTKREFTKSIYSKDKIRKAPDQEAKTVIDNLISLGFTLQETREILNNEIDWRIKCGSRVIVSTPREDIGASMLIAEDLSTTVNVPVEVVPMEELEKVLSNSNNGTIVTSRYFLQPLEKVAKQHGVRAIAVDLSDFQKELKILKELNAGSCVGIVSISPGLLRAAEVIIHSMRGSELMLMTAISDNNSRLLSLLKASNHIVCDGPSLSVVENTLLKNRSQLMRLPQIICAKNYLSVETINQLKKEIGVIN
	2930	GC_00000141	Bin_1	JFNG01	60	DETECTED		GO:0000096, GO:0000097, GO:0003674, GO:0003824, GO:0005575, GO:0005622, GO:0005623, GO:0005737, GO:0005829, GO:0006082, GO:0006520, GO:0006534, GO:0006535, GO:0006563, GO:0006790, GO:0006807, GO:0008150, GO:0008152, GO:0008374, GO:0008652, GO:0009001, GO:0009058, GO:0009069, GO:0009070, GO:0009333, GO:0009987, GO:0016053, GO:0016407, GO:0016412, GO:0016413, GO:0016740, GO:0016746, GO:0016747, GO:…		E	PIRSF000441	PIRSF000441					SSF51161	SSF51161			146891.A9601_18481	serine acetyltransferase			G3DSA:2.160.10.10	G3DSA:2.160.10.10	COG1045	Serine acetyltransferase		map00270, map00920, map01100, map01120, map01230	PF00132	Bacterial transferase hexapeptide (six repeats)			TIGR01172	cysE: serine O-acetyltransferase	PS00101	Hexapeptide-repeat containing-transferases signature.	Coil	Coil	MILKTFKSDIEIIRERDPAARGIVEIFLCYPGFQSIVIHRFTHKLWQLKIPLIPRLLSHLNRLATGIEIHPGAKIGKRVFIDHGMGVVIGETAEIGNNCLLYQGVTLGGTGKSHGKRHPTLMENVVVGAGAKVLGSITVGSNTRIGAGSVVVRNVEGNSTVVGIPGRVVHQSGVKVNPLAHSALPDAEANVIKNLMDRIDSLENEILKLQKTLQCIASSESIDISKLGDSQNLKDKEILEFLGDD
	5244	GC_00000023	Bin_1	JFNG01	61	DETECTED		GO:0000166, GO:0001882, GO:0001883, GO:0003674, GO:0003824, GO:0005488, GO:0005524, GO:0005575, GO:0005576, GO:0005618, GO:0005622, GO:0005623, GO:0005737, GO:0005829, GO:0005886, GO:0006139, GO:0006152, GO:0006163, GO:0006195, GO:0006200, GO:0006605, GO:0006725, GO:0006753, GO:0006793, GO:0006796, GO:0006807, GO:0006810, GO:0006886, GO:0006950, GO:0006952, GO:0008104, GO:0008150, GO:0008152, GO:…		U			PR00906	SecA protein signature	PS51196	SecA family profile.	SSF52540	SSF52540			146891.A9601_18491	Part of the Sec protein translocase complex. Interacts with the SecYEG preprotein conducting channel. Has a central role in coupling the hydrolysis of ATP to the transfer of proteins into and across the cell membrane, serving as an ATP-driven molecular motor driving the stepwise translocation of polypeptide chains across the membrane (By similarity)	MF_01382	Protein translocase subunit SecA [secA].	G3DSA:3.40.50.300	G3DSA:3.40.50.300	COG0653	Preprotein translocase subunit SecA (ATPase, RNA helicase)		map03060, map03070	PF07517	SecA DEAD-like domain	SM00957	SecA DEAD-like domain	TIGR00963	secA: preprotein translocase, SecA subunit	PS01312	SecA family signature.	Coil	Coil	MLKLLLGDPNTRKLKRYQPIVEEINFLEEEISQLTDDELRKETQNLKSNISAELDFKKQKELLEEFLPRAFAIVREASKRVLDMRHFDVQLIGGMVLNECQIAEMKTGEGKTLVATLPCFLNALTGKGVHVVTVNDYLARRDAEWMGQVHRFLGLSVGLIQQDMNPVERKKNYDCDITYATNSELGFDYLRDNMATDITEVVQRKFNYCVIDEVDSILIDEARTPLIISGQVERPQEKYQKAAELSLALVKAKELSKDGIDPEGDYEVDEKQRSCILTDQGFAKCEEYLGVNDLYNPQDPWAHYITNALKAKELFIKDVNYIIKNHEAVIVDEFTGRVMPGRRWSDGQHQAIEAKENLKIQPETQTLASITYQNFFLLYPGLAGMTGTAKTEEVEFEKT…
	8747	GC_00000512	Bin_1	JFNG01	62	DETECTED				K							SSF55729	SSF55729			167546.P9301_18311	acetyltransferase, (GNAT) family			G3DSA:3.40.630.30	G3DSA:3.40.630.30	COG0454	N-acetyltransferase, GNAT superfamily (includes histone acetyltransferase HPA2)			PF13508	Acetyltransferase (GNAT) domain									MKEISLIKHAKGALGLRIFGLGPNLKPTNGLIKLQKLLDNNAFWARNRTINDLKKCLANSDVVISLWVGKEIVGFGRALTDGIYRGVLWDIVIDQNHQGKGFGTLILNNLLSSKKIKNTKKLYLMTTNKKLFYSQFDFKEVTSQNLLIREI
	4363	GC_00001442	Bin_1	JFNG01	63	DETECTED				K							SSF54427	SSF54427			146891.A9601_18511	Transcriptional regulator			G3DSA:3.10.450.50	G3DSA:3.10.450.50					PF12680	SnoaL-like domain									MKRVISTEDLKGLFTKPYGTDAPTKQKWAEFYNENVIFTDPTQETEGLDSYVKAQEKLVKRCDDVFLETHAISITGDCGFVEWTMGLKIMGKEFIYPGTTRLLFGENGLIKEHRDYFDFCGPTFGPVPILGPFIRWLYSKFVS
	6575	GC_00002241	Bin_1	JFNG01	64	NOT DETECTED																																	Coil	Coil	MPNSANNESLNITDEVIKKSATIKAYTEWKKNTSYSEDIKNKVEFAMQVNEIGFEDDGQPYNEFNVIERYAYNDSDAERSVDSINDLDEKTKSEWNRPKTKDEVEKDRREAEKFFEEAVERSCISTKAAFLKSERYQLQVPSGLDILIQSASAAQGRSAASFALYALEYGLNQLLENGSIPKIAEKKYQSHCEMLAALGDVKTLFKKVAERDPYFEEKSCY
	3132	GC_00002499	Bin_1	JFNG01	65	NOT DETECTED																									PF12705	PD-(D/E)XK nuclease superfamily									MANLNLEGITKKKLFCTGPSLLSEYIANPDPCPLPMWASHIAKPDKKSSFDLDQYKKTHKKVETFVNPIFQNMLSSAYHYEPDTKKLKCVIKGKTIFGVPDLLATTKEKIFVCDIKTGERKITEHSLQVGTYAFMALAQGIAQDIGGLYLAYGSKKENLEIIELPNIEDIWTLERQVKAEELMDLLEEENEPTPNPSENNCRYCKWSNRCNVAHKSTKKVEMFSVLKK
	9462	GC_00001945	Bin_1	JFNG01	66	NOT DETECTED																																			MKKSAKFKKIIGIVNCSSPYLIIHLESKFEETIYAELSSDSFPIHHAKLMMGQELLFDRDDGQNQLARILPFTRQKPEFISKLISKLINQGKHKLSKIPVLDSQDSLQEDTKDLKNKLSFLLKLESLYLEDPHKDQIT
	329	GC_00001999	Bin_1	JFNG01	67	NOT DETECTED				S															G3DSA:3.40.91.30	G3DSA:3.40.91.30															MITKTRSIQTYYKGYYFRSRLEARYAVFLDYLGIRWKYETEGYIIEKNEFSETFGHVGEAYLPDFFLPDLHIYLEIKPEGPTGHSNFSEDVNKALAFGAYVCQGLPEENDINPAGWIERGFDNPYADKRYSLLVPFDHGYDWCYCYSQKKIGIEYEGRSDRLIPRDQKKDDRGHNSDALILRQAWRAARTARFEHGQRGMLWK
	9189	GC_00002418	Bin_1	JFNG01	68	NOT DETECTED																																			MEINNEEVYDPDDKEIIEVLNNYLETRSKMLDNLQTIIGLLMEHLVAYKEQQSHLRQLTKLLQTKRLKGYKNHLKDCYDKDI
	5344	GC_00001543	Bin_1	JFNG01	69	DETECTED		GO:0000906, GO:0003674, GO:0003824, GO:0008150, GO:0008152, GO:0016853, GO:0016866, GO:0016867, GO:0040007		H							SSF52121	SSF52121			167546.P9301_18331	Catalyzes the formation of 6,7-dimethyl-8- ribityllumazine by condensation of 5-amino-6-(D- ribitylamino)uracil with 3,4-dihydroxy-2-butanone 4-phosphate. This is the penultimate step in the biosynthesis of riboflavin (By similarity)	MF_00178	6,7-dimethyl-8-ribityllumazine synthase [ribH].	G3DSA:3.40.50.960	G3DSA:3.40.50.960	COG0054	6,7-dimethyl-8-ribityllumazine synthase (Riboflavin synthase beta chain)		map00740, map01100	PF00885	6,7-dimethyl-8-ribityllumazine synthase			TIGR00114	lumazine-synth: 6,7-dimethyl-8-ribityllumazine synthase					MAIFEGSFTNASTLKVGIVIARFNDLITNKILSGCLDCLKRHGLDTSELSNQVDIVWVPGSFELPIAAKTLMKKKSYDVVIALGAVIRGETSHYDVVISEASKGISQVSNQNNVPIIFGVLTTDTMQQALERAGIKNNLGWNYALQAIEMGSLIKNLN
	7051	GC_00001257	Bin_1	JFNG01	70	DETECTED											SSF161055	SSF161055	PD004770	PHOTOSYSTEM II CENTER REACTION PHOTOSYNTHESIS TRANSMEMBRANE THYLAKOID CHLOROPLAST Z PLASTID					G3DSA:1.10.287.740	G3DSA:1.10.287.740					PF01737	YCF9			TIGR03043	PS_II_psbZ: photosystem II core protein PsbZ					MQAVNFFFVNALLFASLIAVVGVPVLYVTQPSTEEGQRESRRKIYSIAAVWVVLVFVTGIVSSLV
	7565	GC_00000241	Bin_1	JFNG01	71	DETECTED		GO:0003674, GO:0003676, GO:0003677, GO:0003684, GO:0003690, GO:0003824, GO:0005488, GO:0005575, GO:0005622, GO:0005623, GO:0006139, GO:0006152, GO:0006163, GO:0006195, GO:0006200, GO:0006259, GO:0006281, GO:0006298, GO:0006725, GO:0006753, GO:0006793, GO:0006796, GO:0006807, GO:0006950, GO:0006974, GO:0008094, GO:0008150, GO:0008152, GO:0009056, GO:0009116, GO:0009117, GO:0009119, GO:0009123, GO:…		L	PIRSF037677	PIRSF037677					SSF48334	SSF48334			146891.A9601_18541	that it carries out the mismatch recognition step. This protein has a weak ATPase activity (By similarity)	MF_00096	DNA mismatch repair protein MutS [mutS].	G3DSA:3.40.50.300	G3DSA:3.40.50.300	COG0249	DNA mismatch repair ATPase MutS		map03430	PF00488	MutS domain V	SM00534	ATPase domain of DNA mismatch repair MUTS family	TIGR01070	mutS1: DNA mismatch repair protein MutS	PS00486	DNA mismatch repair proteins mutS family signature.			MQEDTIIQKNLFAIGNDNNEQKEITKIPEDLSLEDLKKESQKRPRQRKNSTNLINQFKADLISNNKNVCINEESYSYKTVSKLKLTPVMKHYVTLKEENKDRLLLYRLGDFFECFFEDAVLISNLLEITLTSKDAGKEIGKIPMAGVPHHAMERYCADLIKKNYSVVICDQLEKSSGNYGTPIKRGITRIITPGTVIEEGMLIAKKNNWITAIYVSEENSDESYEWGISKADVSTGELITLEGESLSKLFDEIIKLDSSEIIVGSNAVRNLLIKGNSQITYTVSQETNFGINEANYLIKNYFQIANLEGIGLKNLNNATRSLGGLLSYLEKINPSNLDKDSSLKISLDFPQIQYGHNKLIIDYQTQKNLEIKNTQRENNYVGSLLWSIDRTYTCMGARC…
	2228	GC_00001375	Bin_1	JFNG01	72	DETECTED		GO:0003674, GO:0003824, GO:0006725, GO:0006766, GO:0006767, GO:0006807, GO:0008150, GO:0008152, GO:0009058, GO:0009110, GO:0009235, GO:0009236, GO:0009987, GO:0016853, GO:0016866, GO:0016867, GO:0016993, GO:0018130, GO:0019438, GO:0033013, GO:0033014, GO:0034641, GO:0042364, GO:0044237, GO:0044249, GO:0044271, GO:0044281, GO:0044283, GO:0044710, GO:0044711, GO:0046483, GO:0071704, GO:1901360, GO:…		H							SSF63965	SSF63965			167546.P9301_18361	Precorrin-8x methylmutase			G3DSA:3.40.50.10230	G3DSA:3.40.50.10230	COG2082	Precorrin isomerase		map00860, map01100	PF02570	Precorrin-8X methylmutase									MVIDHPIFLESIRFIRSHLLANDLNYLEKKVLERLVHTSGDFSVQNLVNFSEGACEKGLQALINGAPILTDTDMAAAAIKSMAENTTRNKVFTARMWFEKNNHTNLTKTAYGLSEGWKELSAMNSGSKSPIVVIGSSPTALTYLIDILENAKDLPSLIIGMPVGFIGVEKSKNKLISTDLPRIVLNSTRGGAAMAAAAVNALLRETI
	501	GC_00001407	Bin_1	JFNG01	73	DETECTED				L							SSF48019	SSF48019			146891.A9601_18561	DNA polymerase III (Delta subunit)			G3DSA:1.10.8.60	G3DSA:1.10.8.60	COG1466	DNA polymerase III, delta subunit		map00230, map00240, map01100, map03030, map03430, map03440	PF06144	DNA polymerase III, delta subunit			TIGR01128	holA: DNA polymerase III, delta subunit					MPIQILWGNDLNAQNTFIQKLIDKEVSKEWKEINVTNLNGDHDEDVNKAFDEVLTPPFGEGYRIVTLKNNPIFTAKNEDLRTKFEKIHDNIPQNTYFILQNTKKPDSRLKSTKFLQKLIKNNLAKEKSFSLPEIWDYEGQKRFLEDTANEMNIKIDKNAAELIIDSVGNDSFKLINELAKAKTYLSAVSSDSNSQLFLKSIDVKKIFSDHQSNIFKIIDLLLQKNINESLIEINYSLQKGEPALRLNAGLISQIRIHTIIKLAVNSGNDNAEKICNLAGISNPKRIFFIRRKVKNVSQEYLINLMSNLLDIESLLKQGNNPINVFTEKLINLS
	1184	GC_00001586	Bin_1	JFNG01	74	DETECTED		GO:0000096, GO:0000097, GO:0003674, GO:0003824, GO:0004072, GO:0006082, GO:0006520, GO:0006553, GO:0006555, GO:0006566, GO:0006790, GO:0006793, GO:0006796, GO:0006807, GO:0008150, GO:0008152, GO:0008652, GO:0009058, GO:0009066, GO:0009067, GO:0009085, GO:0009086, GO:0009088, GO:0009089, GO:0009987, GO:0016053, GO:0016301, GO:0016310, GO:0016740, GO:0016772, GO:0016774, GO:0019202, GO:0019752, GO:…		E					PS51671	ACT domain profile.	SSF53633	SSF53633			167546.P9301_18381	aspartate kinase (EC 2.7.2.4)			G3DSA:3.40.1160.10	G3DSA:3.40.1160.10	COG0527	Aspartokinase		map00260, map00270, map00300, map01100, map01110, map01120, map01210, map01230	PF00696	Amino acid kinase family			TIGR00657	asp_kinases: aspartate kinase	PS00324	Aspartokinase signature.			MALLVKKFGGTSVGDIKKIKNIASSICQSKEAGNEIIVVVSAMGQTTDDLNCLAESISKNPNRRELDMLLSTGEQVTIALLSMALNEYGISAISMTGSQVGIITESIHGKARILDIKTERIQHYINQGFVVVVAGFQGTTLSHTGSMEITTLGRGGSDTSAVALSTALGAETCEIYTDVPGVLTTDPRIVPNAKLLDKISCEEMLELASVGASVLHPRAVEIARNYGIKLCVKSSQSDSSGTLLESQIKPLPLKRGSLELTKTVNSLEVLENQAVFSLSNIPDRPGIAAQIFEKLSEASISVDLIIQATNDGNQNDITFTVSELEIKKTAEQCELITSQLGGEYNLKTNMTKLSIQGAGIMGRPSVSADLFDTLSQANINVRLIATSEIKVSCVIEINN…
	7585	GC_00001398	Bin_1	JFNG01	75	DETECTED		GO:0002682, GO:0002684, GO:0005575, GO:0005622, GO:0005623, GO:0005737, GO:0005886, GO:0006950, GO:0008150, GO:0009607, GO:0016020, GO:0031347, GO:0035821, GO:0044003, GO:0044403, GO:0044419, GO:0044424, GO:0044464, GO:0048518, GO:0048583, GO:0048584, GO:0050776, GO:0050778, GO:0050789, GO:0050896, GO:0051409, GO:0051701, GO:0051704, GO:0051707, GO:0051817, GO:0052031, GO:0052173, GO:0052200, GO:…		L					PS51192	Superfamilies 1 and 2 helicase ATP-binding type-1 domain profile.	SSF52540	SSF52540			167546.P9301_18391	damaged site, the DNA wraps around one UvrB monomer. DNA wrap is dependent on ATP binding by UvrB and probably causes local melting of the DNA helix, facilitating insertion of UvrB beta-hairpin between the DNA strands. Then UvrB probes one DNA strand for the presence of a lesion. If a lesion is found the UvrA subunits dissociate and the UvrB-DNA preincision complex is formed. This complex is subs…	MF_00204	UvrABC system protein B [uvrB].	G3DSA:3.40.50.300	G3DSA:3.40.50.300	COG0556	Excinuclease UvrABC helicase subunit UvrB		map03420	PF12344	Ultra-violet resistance protein B	SM00487	DEAD-like helicases superfamily	TIGR00631	uvrb: excinuclease ABC subunit B			Coil	Coil	MNNYKLQAPYEPNGDQPEAIKKLVKGINTGKEFQTLLGATGTGKTFTIANVIQQTGRPALVLAHNKTLAAQLCNELREFFPKNAVEYFISYYDYYQPEAYVPVSDTYIAKTASINEEIDMLRHSATRSLFERKDVIVVASISCIYGLGIPSEYLKAAVKFEVGKSINLRSSLRSLVENQYTRNDIEITRGRFRIKGDVLEIGPAYEDRLIRIEFFGDEVEAIRYVDPTTGEILESLEQVSVYPAKHFVTPKERLESAISAIRSELKTQLDKFTYEGKLLEAQRLEQRTKYDLEMLKEVGYCNGVENYARHLSGREEGSPPECLIDYFPKDWLLVVDESHVTCPQLHAMYNGDQSRKKVLIDHGFRLPSAADNRPLKCEEFWEKSKQTLFISATPGQWEL…
	345	GC_00000284	Bin_1	JFNG01	76	DETECTED				S							SSF51569	SSF51569							G3DSA:3.20.20.70	G3DSA:3.20.20.70					PF04481	Protein of unknown function (DUF561)									-----------MSLINLLPQKIKEELRSKSLLKVISGLNNFDVQSVKIIVEAASLGGADLVDIACKPELVDLALKNSTLPVCVSSVVPQSFQDSVKAGASLIEIGNYDTFYEKGISFSDKKVLNITKETRDLLPNVPLSVTVPHTMPIDKQVDLAMKLVEEGVNIIQTEGGTSSRPYSSGIQGFFEKSVPTLAATYAIHQEFKKQSLNIPIMSASGLSQVTCPLAISSGASAVGVGSVVNKLDDLISMIAVVRGLKESLKNSIIGEKIS----
	4169	GC_00001209	Bin_1	JFNG01	77	DETECTED		GO:0005575, GO:0005622, GO:0005623, GO:0005737, GO:0044424, GO:0044464		D							SSF52402	SSF52402			167546.P9301_18411	Ligates lysine onto the cytidine present at position 34 of the AUA codon-specific tRNA(Ile) that contains the anticodon CAU, in an ATP-dependent manner. Cytidine is converted to lysidine, thus changing the amino acid specificity of the tRNA from methionine to isoleucine (By similarity)	MF_01161	tRNA(Ile)-lysidine synthase [tilS].	G3DSA:3.40.50.620	G3DSA:3.40.50.620	COG0037	tRNA(Ile)-lysidine synthase TilS/MesJ			PF01171	PP-loop family			TIGR02432	lysidine_TilS_N: tRNA(Ile)-lysidine synthetase			Coil	Coil	MTDKKFTQKNWTSWHHQLHKEILTKKILIPKGSNILMSVSGGQDSMALLTLINDLKKLHNWSINVWHGDHQWHAKSSLYALELKEYCDDKNISFSFDQANKESISSEEKAREWRYRKLCERAKTLLNANQQKHNIYLLTGHTSSDNAETFILNLSRGSNFAGLSNIESKRLIENQIFLIRPILIFSREDTKQFCNDMKIPVWEDPTNSDLKLKRNLVRKKIIPTLEVIYPGCSERINNFSQKMSKYNNERNDLSELAYLYCKNVKGIDRNLLNGMCIEARCTILNRFLKEISTKQCSSKNLTKLATSIYEKNKGQINLQDFLKIVWNKNYINFEKS
	1333	GC_00000751	Bin_1	JFNG01	78	DETECTED		GO:0005575, GO:0005622, GO:0005623, GO:0005737, GO:0044424, GO:0044464		O							SSF56281	SSF56281			146891.A9601_18611	Metallo-Beta-Lactamase	MF_01491	Ribonuclease J [rnj].	G3DSA:3.60.15.10	G3DSA:3.60.15.10	COG0595	mRNA degradation ribonuclease J1/J2		map03018	PF00753	Metallo-beta-lactamase superfamily	SM00849	Metallo-beta-lactamase superfamily	TIGR00649	MG423: beta-CASP ribonuclease, RNase J family	PS01292	Uncharacterized protein family UPF0036 signature.			MQSSTNSTVNRSTHDSSRS-KSNTPALRVIPLGGLHEIGKNTCVFEYGDELMLVDAGLAFPSDGMHGVNVVMPDTTFLKENQRRIKGMIVTHGHEDHIGGISHHLKHFNIPIIYGPRLAMSMLRGKMEEAGVSDRTTIQTVNPRDVVKVGQHFSVEFIRNTHSICDSFSLAVTTPVGTIIFTGDFKFDHMPVDGEQFDIERMVHYGEKGVLCMFSDSTNAEVPGFCPSEKTIYPSLEKHIAEAKERVILTTFASSVHRVTMILELAMKHGRKVGLLGRSMINVIAKARDIGYMKCPDDLFVPIKQIRDLPDRETLLLMTGSQGEPLAALSRISRGEHQHVRLKTTDTVIFSASPIPGNTISVVNTIDRLMKLGAKVVYGKGENIHVSGHGFQEDQKLML…
	9009	GC_00001029	Bin_1	JFNG01	79	DETECTED		GO:0005575, GO:0005622, GO:0005623, GO:0005737, GO:0044424, GO:0044464		E	PIRSF001365	PIRSF001365	PR00146	Dihydrodipicolinate synthase signature			SSF51569	SSF51569			146891.A9601_18621	Catalyzes the condensation of (S)-aspartate-beta- semialdehyde (S)-ASA and pyruvate to 4-hydroxy- tetrahydrodipicolinate (HTPA) (By similarity)	MF_00418	4-hydroxy-tetrahydrodipicolinate synthase [dapA].	G3DSA:3.20.20.70	G3DSA:3.20.20.70	COG0329	Dihydrodipicolinate synthase/N-acetylneuraminate lyase		map00300, map01100, map01110, map01120, map01230	PF00701	Dihydrodipicolinate synthetase family			TIGR00674	dapA: 4-hydroxy-tetrahydrodipicolinate synthase	PS00665	Dihydrodipicolinate synthase signature 1.			MITDKTECNKPLFGKILTAMVTPFTENGDVDYELAIKLSNYLFENGSDGIVLCGTTGESPTLSWAEQHDLFVAVRGSLDATCKVIVGTGSNCTSEAVEATKKAYESGADGALVVVPYYNKPPQEGLYKHFSSIANSAKDLPLMLYNIPGRTGCNLLPDTVKKLMDFSNILSIKAASGRIEEVTELRAICGSELSVYSGDDSLLLPMLSVGAVGVVSVASHLVGLQLKEMIHSFQSGEVSNALAIHEKLQPLFKALFMTTNPIPIKAALELSGWDVGNPRSPLSPLTNDMKKQLSFILKSL-------
	6549	GC_00000122	Bin_1	JFNG01	80	DETECTED				E	PIRSF000148	PIRSF000148					SSF55347	SSF55347			146891.A9601_18631	Catalyzes the NADPH-dependent formation of L-aspartate- semialdehyde (L-ASA) by the reductive dephosphorylation of L- aspartyl-4-phosphate (By similarity)	MF_02121	Aspartate-semialdehyde dehydrogenase [asd].	G3DSA:3.30.360.10	G3DSA:3.30.360.10	COG0136	Aspartate-semialdehyde dehydrogenase		map00260, map00270, map00300, map01100, map01110, map01120, map01210, map01230	PF02774	Semialdehyde dehydrogenase, dimerisation domain	SM00859	Semialdehyde dehydrogenase, NAD binding domain	TIGR01296	asd_B: aspartate-semialdehyde dehydrogenase					MRQSPFLPNRPLKVAVLGSSGAVGSELLKILEQRHFPISELVLLSSERSEGKKIIWKGEELVTKKTTKEEFLNLDLVLASAGGSISKKWLSTIMEQNALLIDNSSAFRLDNNVPLIVPEVNGSDAINHDGVIANPNCTTILLTLVLAPLNKLSTIQRVVVSTYQSVSGAGQLAMEELKLLTEKYLRGNPQKSEVLPYSLAFNLFLHNSPMLANNYCEEEMKMVNETRKILNIADLKLSATCVRVPVLRAHSESINIEFASVVEPKDALEELKKSPGIEIIEDYKNNRFPMPNDVMGRDNVAVGRIRTDISQPNGLELWLCGDQIRKGAALNAVQIAELLIPKK
	1089	GC_00000278	Bin_1	JFNG01	81	DETECTED		GO:0000413, GO:0003674, GO:0003755, GO:0003824, GO:0005488, GO:0005515, GO:0005575, GO:0005618, GO:0005622, GO:0005623, GO:0005737, GO:0005829, GO:0005886, GO:0006457, GO:0006458, GO:0006461, GO:0006464, GO:0006950, GO:0007154, GO:0008150, GO:0008152, GO:0009267, GO:0009605, GO:0009636, GO:0009987, GO:0009991, GO:0016020, GO:0016043, GO:0016853, GO:0016859, GO:0018193, GO:0018208, GO:0019538, GO:…		O	PIRSF003095	PIRSF003095			PS50059	FKBP-type peptidyl-prolyl cis-trans isomerase domain profile.	SSF109998	SSF109998			146891.A9601_18641	Involved in protein export. Acts as a chaperone by maintaining the newly synthesized protein in an open conformation	MF_00303	Trigger factor [tig].	G3DSA:1.10.3120.10	G3DSA:1.10.3120.10	COG0544	FKBP-type peptidyl-prolyl cis-trans isomerase (trigger factor)			PF05697	Bacterial trigger factor protein (TF)			TIGR00115	tig: trigger factor			Coil	Coil	MAKEALIVKTTPLPQSRISFELEIPSETCKTCVNETISSISRSAKIPGFRLGKIPKQVLIQRIGITQLHASALEKIIDKSWQEALKIKSIEPLSEPELVDGFESLLAKFSPEKSLKVTLQTDVAPELKLKKSKGLSVEISKTKFDPKSIDEALEKSRNQFANIIPVTNRAAKLGDIAVVSFKGKYKDSGKEIDGGTSESMDLELEKNKMIPGFVEGIVKMKIGDTKTLNLKFPEDYSHEDSRGKEAIFEVNLKDLKEKELPELNDDFAKQSGNKESLKELKKDIEKQLKDNFEKTQKDIKIEALLDALTNELVAEIPKSMIDIEVRNNIEQTAQRFAQQGLDIKSTFTPELVKSLAESTRPQAEKNVQRNLALKALAETENIKVEKDEIDLKMKDYEEA…
	2891	GC_00000004	Bin_1	JFNG01	82	DETECTED		GO:0005575, GO:0005622, GO:0005623, GO:0005737, GO:0044424, GO:0044464		O			PR00127	Clp protease catalytic subunit P signature			SSF52096	SSF52096			146891.A9601_18651	Cleaves peptides in various proteins in a process that requires ATP hydrolysis. Has a chymotrypsin-like activity. Plays a major role in the degradation of misfolded proteins (By similarity)	MF_00444	ATP-dependent Clp protease proteolytic subunit [clpP].	G3DSA:3.90.226.10	G3DSA:3.90.226.10	COG0740	ATP-dependent protease ClpP, protease subunit		map04112	PF00574	Clp protease			TIGR00493	clpP: ATP-dependent Clp endopeptidase, proteolytic subunit ClpP	PS00382	Endopeptidase Clp histidine active site.			MNSEKKHLIQSSISSYESNNKTIAAVPTVIEQSGRGERAFDIYSRLLRERIIFLGTGINDQVSDSLVAQLLFLEAEDPEKDIQIYINSPGGSVTAGMAIYDTMQQISPDVVTICFGVAASMGAFLLSGGSKGKRLALPNSRIMIHQPLGG-AQGQAVEIEIQAKEILFLKKTLNSLLAEHTGQPLEKINEDTERDYFLSPSEAVEYGLIDKVIKK-------
	1559	GC_00000114	Bin_1	JFNG01	83	DETECTED		GO:0000166, GO:0001882, GO:0001883, GO:0003674, GO:0003824, GO:0005488, GO:0005524, GO:0006508, GO:0008150, GO:0008152, GO:0008233, GO:0016787, GO:0017076, GO:0019538, GO:0030554, GO:0032549, GO:0032550, GO:0032553, GO:0032555, GO:0032559, GO:0035639, GO:0036094, GO:0043167, GO:0043168, GO:0043170, GO:0044238, GO:0071704, GO:0097159, GO:1901265, GO:1901363		O							SSF52540	SSF52540			146891.A9601_18661	ATP-dependent specificity component of the Clp protease. It directs the protease to specific substrates. Can perform chaperone functions in the absence of ClpP (By similarity)	MF_00175	ATP-dependent Clp protease ATP-binding subunit ClpX [clpX].	G3DSA:3.40.50.300	G3DSA:3.40.50.300	COG1219	ATP-dependent protease Clp, ATPase subunit		map04112	PF07724	AAA domain (Cdc48 subfamily)	SM01086	C-terminal, D2-small domain, of ClpB protein	TIGR00382	clpX: ATP-dependent Clp protease, ATP-binding subunit ClpX					MAKFDAHLKCSFCGKSQDQVRKLIAGPGVYICDECIDLCNEILDEELLDNQTTTNNSPQVKKKLPTDNSKKSIPLELTSIPKPLEIKSFLDNQVVGQESAKKILSVAVYNHYKRLAWKVKEDTKNNNSTDSQATKLHKSNILLIGPTGSGKTLLAQTLAEFLDVPFAVADATTLTEAGYVGEDVENILLRLLQKSEMNVELAQKGIIYIDEIDKIARKSENPSITRDVSGEGVQEALLKMLEGTIANVPPQGGRKHPYNDCIQIDTSQILFICGGAFIGLEDIVQKRMGKHSIGFTTNPDQNKVDAKKIVDPRDSLKNLELDDLVKYGLIPEFIGRIPVCAVLDRLTKETLESILTQPRDALVKQFKTLLSMDNVELSFEPDSVEAIANEAYKRKTGAR…
	456	GC_00000088	Bin_1	JFNG01	84	DETECTED		GO:0003674, GO:0003824, GO:0003887, GO:0005575, GO:0005622, GO:0005623, GO:0006139, GO:0006152, GO:0006163, GO:0006195, GO:0006200, GO:0006259, GO:0006260, GO:0006725, GO:0006753, GO:0006793, GO:0006796, GO:0006807, GO:0008150, GO:0008152, GO:0009056, GO:0009058, GO:0009059, GO:0009116, GO:0009117, GO:0009119, GO:0009123, GO:0009125, GO:0009126, GO:0009128, GO:0009141, GO:0009143, GO:0009144, GO:…		L							SSF52540	SSF52540			167546.P9301_18481	dna polymerase iii subunits gamma and tau			G3DSA:3.40.50.300	G3DSA:3.40.50.300	COG2812	DNA polymerase III, gamma/tau subunits		map00230, map00240, map01100, map03030, map03430, map03440	PF13177	DNA polymerase III, delta subunit	SM00382	ATPases associated with a variety of cellular activities	TIGR02397	dnaX_nterm: DNA polymerase III, subunit gamma and tau			Coil	Coil	MPNIHKPFHQKYRPNNLDELVGQKFISITLKQALLTKKIAPAYLFNGSRGTGKTSSARIFAKSLNCQAFDQPTITPCCTCDLCRQIADGSALDIIEIDAASNTGVENIREIIERARFAPTQARWKVYVIDECHMLSTAASNALLKTIEEPPSRVVFILATTNPERVLNTIKSRCQKFDFRRIKPSDIFQHLSEIAKKESIEYEVQALKMIAKRSNGGMRDAQSLLEQLNLLPEGITINNIQNLLGEVSESELTTLLKSLVENNPESLIITCNKLYDAGNEPLQIIIGLLNITRDLLLHTTDNKHSDLYYTSDEFRDELDKISKTINKSTIINWHNNLRNIEYQIKTSDNPRLWFEIHLTGLLGNQEINSFENKLESKNNTTEEKHESRKNIAILNNENI…
	6383	GC_00000046	Bin_1	JFNG01	85	DETECTED				M							SSF53448	SSF53448			146891.A9601_18681	Glycosyl transferase, family 2			G3DSA:3.90.550.10	G3DSA:3.90.550.10	COG1215	Glycosyltransferase, catalytic subunit of cellulose synthase and poly-beta-1,6-N-acetylglucosamine synthase		map00561, map01100	PF13641	Glycosyltransferase like family 2									MSKGFYKNRRLKSFIFLSACFLVAFIPHAYNIENLFYIILILSFVIVFYGLIVITRNFKRKNVLNTVGRRISNKELPLLDILVAARDEENVIARLVERLFSLDYPTNKLNIYIIDDGSSDKTPLILDRLSRQYDKLKVISRSPNAGGGKSGALNYALKFTHGEWLLVLDADAELKQDSLRRLFSFVEEGDWSAVQLRKSVTNVSKNFLTSCQSMEMAMDAIFQYGRLSVAGVSELRGNGQLIKKETLLECGSFNEDTVTDDLDLSLRLLLSKSRIGILWDPPVMEEAVENLNALLAQRQRWAEGGLQRFFDYGDQLFTNKIDYLQKFDLTYFFILQYALPTISIFDLLFSIALLDSPIYWPISFTAFMLSGIAFWYGSSCKSEVPVLHKSNFLMVFVSV…
	2982	GC_00000819	Bin_1	JFNG01	86	DETECTED		GO:0005575, GO:0005623, GO:0030288, GO:0030312, GO:0030313, GO:0031975, GO:0042597, GO:0044462, GO:0044464, GO:0071944		D											146891.A9601_18691	Amidase enhancer			G3DSA:3.30.70.1070	G3DSA:3.30.70.1070	COG2385	Peptidoglycan hydrolase (amidase) enhancer domain			PF08486	Stage II sporulation protein			TIGR02669	SpoIID_LytB: SpoIID/LytB domain					MKLKFAFLKLFLGCISLLLINTKFTSIIKAEELQEVELNNEIKKGKFLIGLKQYLGGENDSFSKKKNIDFITDKGFLNLISSNGIKHKSKQINISWVDIPIKNPKTIERIVFGPFASYESAKKQAEKLKDKGFETTVAYPKNWEVWIPFEDNLPEFELKNKISRKIKNFQITPVLRNEYSVIKLEGPIYIYAQEEIKINGVNFGKNFYLLKDLYGTWTLVQKIEFDDYLAGVLPYEIGPNSPLEALKAQAVIARTWGIFNSDRFNMDKYHLCISTQCQVYKPSKISNKNIQKAIDATSNLILTYENQPINAFYHGSNGGVSAKAGESWQIQDYSYFNSIIDGSKSLNKIFKLPITNESDLNNFLDFDKEQFYGSNHSLFRWNKKISSLQIKEKLIKNKL…
	5607	GC_00001418	Bin_1	JFNG01	87	DETECTED				J			PR00064	Ribosomal protein L35 signature			SSF143034	SSF143034			146891.A9601_18701	50s ribosomal protein L35	MF_00514	50S ribosomal protein L35 [rpmI].			COG0291	Ribosomal protein L35		map03010	PF01632	Ribosomal protein L35			TIGR00001	rpmI_bact: ribosomal protein bL35	PS00936	Ribosomal protein L35 signature.			MSKLKTRKSAAKRFKATATGKFMRRRAFHNHLLDHKSSKLKRHLSTKAIVDERDADNVRLMIPYA
	2445	GC_00001249	Bin_1	JFNG01	88	DETECTED		GO:0000027, GO:0000900, GO:0003674, GO:0003676, GO:0003735, GO:0005198, GO:0005488, GO:0005575, GO:0005622, GO:0005623, GO:0005737, GO:0005829, GO:0005840, GO:0005886, GO:0006412, GO:0006417, GO:0006996, GO:0008150, GO:0008152, GO:0009058, GO:0009059, GO:0009889, GO:0009890, GO:0009892, GO:0009987, GO:0010467, GO:0010468, GO:0010556, GO:0010558, GO:0010605, GO:0010608, GO:0015934, GO:0016020, GO:…		J			PR00062	Ribosomal protein L20 signature			SSF74731	SSF74731	PD002389	RIBOSOMAL RRNA-BINDING RNA-BINDING RIBONUCLEOPROTEIN L20 50S L20 CHLOROPLAST BACTERIAL ORGANELLE	74546.PMT9312_1754	Binds directly to 23S ribosomal RNA and is necessary for the in vitro assembly process of the 50S ribosomal subunit. It is not involved in the protein synthesizing functions of that subunit (By similarity)	MF_00382	50S ribosomal protein L20 [rplT].	G3DSA:1.10.1900.20	G3DSA:1.10.1900.20	COG0292	Ribosomal protein L20		map03010	PF00453	Ribosomal protein L20			TIGR01032	rplT_bact: ribosomal protein bL20	PS00937	Ribosomal protein L20 signature.			MARVKRGNIARKRRNKILNLAKGFRGGNKNLFRTANQRVMKALCNAYRDRRRRKRDFRRLWISRINASARINGTNYSKLINGMKNSQIIINRKMLAQLALNDPECFEKIVSSVSK
	5621	GC_00001360	Bin_1	JFNG01	89	DETECTED				S					PS50005	TPR repeat profile.	SSF48452	SSF48452			167546.P9301_18531	Photosystem I assembly related protein			G3DSA:1.25.40.10	G3DSA:1.25.40.10					PF13414	TPR repeat	SM00028	Tetratricopeptide repeats							MEISSFQSYLIILFVVLVIISIFVFRQFLKTRSEELNLVKFEQKGLDSLTQATELYEFGSIQIKKRLYSEATKTFLKAIENYENEPDEAKAIINNALGFSYAAQNEFKKAIKHYNSAIKSLPEYPIALNNLASAQQRLLDYDLAYATYQKVLVIDPKNKTAIKKSKELEKRNNYKPYTGIKDKGF
	6619	GC_00001496	Bin_1	JFNG01	90	DETECTED		GO:0003674, GO:0003824, GO:0005575, GO:0005622, GO:0005623, GO:0005737, GO:0006725, GO:0006766, GO:0006767, GO:0006772, GO:0006790, GO:0006807, GO:0008150, GO:0008152, GO:0009058, GO:0009110, GO:0009228, GO:0009987, GO:0018130, GO:0019438, GO:0034641, GO:0042364, GO:0042723, GO:0042724, GO:0044237, GO:0044249, GO:0044271, GO:0044272, GO:0044281, GO:0044283, GO:0044424, GO:0044464, GO:0044710, GO:…		H							SSF110399	SSF110399			146891.A9601_18731	Catalyzes the rearrangement of 1-deoxy-D-xylulose 5- phosphate (DXP) to produce the thiazole phosphate moiety of thiamine. Sulfur is provided by the thiocarboxylate moiety of the carrier protein ThiS. In vitro, sulfur can be provided by H(2)S (By similarity)	MF_00443	Thiazole synthase [thiG].	G3DSA:3.20.20.70	G3DSA:3.20.20.70	COG2022	Thiamin biosynthesis thiazole synthase ThiGH, ThiG subunit		map00730, map01100	PF05690	Thiazole biosynthesis protein ThiG									MENYSSLIIGGKQFSSRLMVGTGKYKSTQDMVESLSNSETEIITVAVRRIKNNQAGENLLEKINWKKYWMLPNTAGCINSDEAVRIAILGRELAKLSGQEENNFVKLEVIPDKKYLLPDPIETLKAAEILIKKGFAVLPYINADPILAKRLEEIGCVTVMPLGSPIGSGQGLLNLSNIRIIIENAKVPVIIDAGIGVPSEASQAMEIGADGVLINSAIAQAANPPLMAQAINYSVKAGRQAFLAGRIKKQDFAVASSPEKNISI
	7022	GC_00001238	Bin_1	JFNG01	91	DETECTED				M							SSF51735	SSF51735			167546.P9301_18551	UDP-sulfoquinovose synthase			G3DSA:3.40.50.720	G3DSA:3.40.50.720				map00520, map00561	PF01370	NAD dependent epimerase/dehydratase family									MKVIVLGGDGFCGWPCAVNLAEQNHDVIIVDNLSRRKIDIDLEVESLTPISSITERLSAWEETGGKPMRFLNMDISKQYQKLLNLLIDEKPDSVIHFAEQRAAPYSMKSSFTKRYTVDNNVNGTHNLLAAIVESNLDIHVVHLGTMGVYGYGSHRGATIPEGYLKVEVPQPDGSRFEEEILHPASPGSVYHMTKTLDQLLFLYYNKNDLVRITDLHQGIVWGTNTEATLKDPRLTNRFDYDGDYGTVLNRFLMQAAIGYPLSVHGTGGQTRAFIHIKDSVKCVQLALENPPKSGERVKIFNQMTESHQVGELAKKVASLTGADINYLPNPRNEAVENDLIVDNKCFIELGLNPTTLDNGLLEEVVEVAKKYSNRCDLNRIPCVSSWTKKQAEAIKTN
	8190	GC_00001350	Bin_1	JFNG01	92	DETECTED				M							SSF53756	SSF53756			146891.A9601_18751	Glycosyl transferase (Group 1			G3DSA:3.40.50.2000	G3DSA:3.40.50.2000	COG0438	Glycosyltransferase involved in cell wall bisynthesis		map00051	PF00534	Glycosyl transferases group 1									MKIALFTETFLPKVDGIVTRLTKTIEFLIKNGDEVIVFCPEGCPESYMGATVEGVAAMPLPLYPELKLGLPGPAVSDKLEKFNPDLIHVVNPAVLGLGGIWLAKTNNIPLIASYHTHLPKYLEHYGMGMLEPLLWELLKAAHNQALLNLCTSTAMVNELKDKGIQRTALWQRGVDTYSFRPDLRSEKMRDKLFGKYKDANYLLIYVGRLSAEKQIERIKPVLESIPNACLALVGDGPYRNQLEKIFENTKTNFIGYLSGDELASAYASGDIFLFPSSTETLGLVLLEAMAAGCPVIGANKGGIPDIISDGINGCLYDPDEKDNGVQSLIEATKKILENEDKREIMRKEARNEAEKWDWNQATLQLQNYYSDTLKEID
	3727	GC_00001328	Bin_1	JFNG01	93	DETECTED				S																															MTKDFKSGNVKQLPVKHVNLPNFVNNFSGDNSNICSIDGTNVIRVPFGKKFSKKKRPEKNQNIATLILPLSSYSNPTPPHVA
	4200	GC_00001514	Bin_1	JFNG01	94	DETECTED		GO:0003674, GO:0003824, GO:0004375, GO:0005575, GO:0005618, GO:0005622, GO:0005623, GO:0005737, GO:0005829, GO:0005886, GO:0008150, GO:0008152, GO:0016020, GO:0016491, GO:0016638, GO:0016642, GO:0030312, GO:0040007, GO:0044424, GO:0044444, GO:0044464, GO:0044710, GO:0055114, GO:0071944		E							SSF53383	SSF53383			167546.P9301_18581	The glycine cleavage system catalyzes the degradation of glycine. The P protein binds the alpha-amino group of glycine through its pyridoxal phosphate cofactor			G3DSA:3.40.640.10	G3DSA:3.40.640.10	COG0403, COG1003	Glycine cleavage system protein P (pyridoxal-binding), N-terminal domain; Glycine cleavage system protein P (pyridoxal-binding), C-terminal domain		map00260, map01100	PF02347	Glycine cleavage system P-protein			TIGR00461	gcvP: glycine dehydrogenase					MTSKFGSDLFIDRHLGLGDNDERIMLNKLGFNNIDKFINQVIPEDIQLKDKSSEILPQGCSEIEALNELEEIANKNTKMRSLIGLGYYDNHMPKVIQRHVLENPRWYTSYTPYQAEIAQGRLEALFNFQTIVCELTGFPVANASLLDEGTAAAEAMAMSFSARKNKSSKVYLVESNVFDHTFNVLQTRAKPLGISLKRFTQSNLPNHDDVFGMLLQLPGKNGQLYDPTFLISQAHRSEIIVTACIDPLAQVLIKPISEFGVDVAVGSMQRFGVPMGFGGPHAAYFACSEKYKRLIPGRIVGQTLSKNGEKSLRLALQTREQHIRREKATSNICTAQSLLAIISSFYAIYHGPSGLTQIAKRLVELRINLESGLAALGFDIPNGIRFDSIDVYSEHSHRI…
	4964	GC_00001319	Bin_1	JFNG01	95	DETECTED				E					PS50968	Biotinyl/lipoyl domain profile.	SSF51230	SSF51230			146891.A9601_18781	The glycine cleavage system catalyzes the degradation of glycine. The H protein shuttles the methylamine group of glycine from the P protein to the T protein (By similarity)	MF_00272	Glycine cleavage system H protein [gcvH].	G3DSA:2.40.50.100	G3DSA:2.40.50.100	COG0509	Glycine cleavage system H protein (lipoate-binding)		map00630, map01110	PF01597	Glycine cleavage H-protein			TIGR00527	gcvH: glycine cleavage system H protein	PS00189	2-oxo acid dehydrogenases acyltransferase component lipoyl binding site.			MSYKFPDNLNYADTHEYVLEENGLLKIGVSEFAIDQLGDIVFVELADEGATLERGETFGTIESVKAVEEVYLPFSGEIVSVNESVIENPELLQNDPIGDGWLVILKPKSKASIADLMTSEEYQSKVVPK
	5677	GC_00001495	Bin_1	JFNG01	96	DETECTED				P							SSF53383	SSF53383			146891.A9601_18791	aluminum resistance protein			G3DSA:3.40.640.10	G3DSA:3.40.640.10	COG4100	Cystathionine beta-lyase family protein involved in aluminum resistance		map00260, map00270, map00450, map01100, map01230	PF06838	Methionine gamma-lyase									MTNNNNLKLAENAVLSVEESLSKVFQERSNQVFQKLENILTIFKEEKVSTSHFNQSSGSGHDDISREKIDAVFARLFLAEKAAVRMQFVSGTHAISSVLFGILRPGDVMLSLTGQPYDTLEEVIGIRGGGKGSLKDFEIEYKQVNICENFDSFEEKIVHFFKENSCKLVFIQKSCGYSWRQSLTNNQIEKICSLIHSLDPNCICFVDNCYGELVEDSEPISKGANIIAGSLIKNLGGTIVPTGGYVAGDAELVEMACSRLTSPGIGSSAGINFGLGRLILQGLFLAPQIVHESLKGADMVAAVFKNLGFKVLPEPATYRSDLIQSVRLNNPDLVQKVCQSFQNSSPVDSFLNVVPSSMDGYDSKLLMAGGTFIEGSTSEFSADAPLRDPYNIFVQGGSH…
	4552	GC_00001569	Bin_1	JFNG01	97	DETECTED				S																															MAHLIHLWHERNGWSHRVLPLLSEILDLGKVHNSQISNLRNGKLSSPGPEVFLALAQVNTILDQGIEKIRDRFESDYPELWKSLEESALPLKNDSGNPLSAGELFEIFSGLKPLPSSFDWYIEDEEASALSDALSVHFCQNKAWRLCKMQVMDAYAVNKSARRERFAEVIAGIRDYTAEELDGEILDLYEASKKLSYFQGGGPDAFLTELRNLASKK
	880	GC_00001329	Bin_1	JFNG01	98	DETECTED				I			PR00075	Fatty acid desaturase family 1 signature							146891.A9601_18811	desaturase					COG1398	Fatty-acid desaturase		map01040, map03320	PF00487	Fatty acid desaturase									MNSVIFQETAKLKKPVPAEKVIELSEKLLEPSSHSKRYPPRLHKTWGTIGFMVAIHILSLVALQPKFWSLPAVTSLLFFYWVTACLGVTLGYHRLLSHRSFIVPRWLERFFATCGAISCQHGPIDWVGLHRHHHSFSDTEVDHHNSKKGFWWSHMGWMFKDVEALKAVPKLSADLIKDPYYRFLNKYFLFLQIPIGLSLYAIGQKLGVGGWALVLWGIPLRLVVVYHVTWLVNSATHCWGKAPFESGDSSKNNAWVAALTFGEGWHNNHHAFPNSAKQGLFKGQIDITWEHIKILAKFGFAKKVKLPSRSYY
	4907	GC_00000127	Bin_1	JFNG01	99	DETECTED		GO:0003674, GO:0003735, GO:0005198, GO:0005575, GO:0005618, GO:0005622, GO:0005623, GO:0005737, GO:0005829, GO:0005886, GO:0006412, GO:0008150, GO:0008152, GO:0009058, GO:0009059, GO:0009987, GO:0010467, GO:0016020, GO:0019538, GO:0030312, GO:0034645, GO:0043170, GO:0044237, GO:0044238, GO:0044249, GO:0044260, GO:0044267, GO:0044424, GO:0044444, GO:0044464, GO:0071704, GO:0071944, GO:1901576		J							SSF55653	SSF55653			167546.P9301_18631	Binds to the 23S rRNA (By similarity)	MF_00503	50S ribosomal protein L9 [rplI].	G3DSA:3.10.430.100	G3DSA:3.10.430.100	COG0359	Ribosomal protein L9		map03010	PF03948	Ribosomal protein L9, C-terminal domain			TIGR00158	L9: ribosomal protein bL9	PS00651	Ribosomal protein L9 signature.	Coil	Coil	MAKRVQVALTESIASLGKEGDLVDVAPGYARNFLLPYGKAMNVTPAVLKQIERKKEKEKIAADKLKQEALDFQTALSTIGRFTIKKQVGEDGVLFGTVTNGDVAEAIEAATKKEIDRRNITVPDIHNLGSFTAKIKLHPEVNAEVNIEVTS
	5467	GC_00000056	Bin_1	JFNG01	100	DETECTED		GO:0000166, GO:0000228, GO:0001882, GO:0001883, GO:0003674, GO:0003678, GO:0003824, GO:0004386, GO:0005488, GO:0005524, GO:0005575, GO:0005618, GO:0005622, GO:0005623, GO:0005634, GO:0005657, GO:0005658, GO:0005694, GO:0005737, GO:0005829, GO:0006139, GO:0006152, GO:0006163, GO:0006195, GO:0006200, GO:0006259, GO:0006260, GO:0006261, GO:0006268, GO:0006270, GO:0006271, GO:0006725, GO:0006753, GO:…		L					PS51199	Superfamily 4 helicase domain profile.	SSF52540	SSF52540			167546.P9301_18641	Replicative dna helicase			G3DSA:3.40.50.300	G3DSA:3.40.50.300	COG0305	Replicative DNA helicase		map03030, map04112	PF03796	DnaB-like helicase C terminal domain	SM00382	ATPases associated with a variety of cellular activities	TIGR00665	DnaB: replicative DNA helicase					MVSVPFPNNGQNKNFKKDFNSENSGLVPPQNVQAEEAVLGGILLDPDAIGRIADLIKPEAFYINAHQEIYRTALMLHTQGKPTDLTSMSAWLADNGSLEKIGGNSKLVELVENVSSTASIEQVANLINDKFMRRQLIRSGNEVVQLGFDQTQDTNEVLDKAEQKIFEISQEKPSKGLTQAAEILTSTFNEIESRSLGTSV-AGIPVNFYDLDAMTQGFQRSDLIIVAGRPSMGKTSIVLNLAKNVAQSQDLPVCVFSLEMSKEQLTYRLLSMEVGIESGRLRTGRLQQDEWPLLGEGINSLGQLPIFIDDKPNLSVLEMRSLCRRLIAEQKKELGLIVIDYLQLMEGSTPDNRVQELSRITRGLKSMARELKVPVVALSQLSRGVESRTNKRPMLSDLR…
	974	GC_00001005	Bin_1	JFNG01	101	DETECTED		GO:0000166, GO:0001510, GO:0003674, GO:0005488, GO:0005575, GO:0005622, GO:0005623, GO:0005737, GO:0006139, GO:0006396, GO:0006399, GO:0006400, GO:0006725, GO:0006807, GO:0008033, GO:0008150, GO:0008152, GO:0009451, GO:0009987, GO:0010467, GO:0016070, GO:0030488, GO:0032259, GO:0034470, GO:0034641, GO:0034660, GO:0036094, GO:0043167, GO:0043168, GO:0043170, GO:0043412, GO:0043414, GO:0044237, GO:…		D							SSF51905	SSF51905			146891.A9601_18841	NAD-binding protein involved in the addition of a carboxymethylaminomethyl (cmnm) group at the wobble position (U34) of certain tRNAs, forming tRNA-cmnm(5)s(2)U34 (By similarity)	MF_00129	tRNA uridine 5-carboxymethylaminomethyl modification enzyme MnmG [mnmG].	G3DSA:3.50.50.60	G3DSA:3.50.50.60	COG0445	tRNA U34 5-carboxymethylaminomethyl modifying enzyme MnmG/GidA			PF01134	Glucose inhibited division protein A			TIGR00136	gidA: tRNA uridine 5-carboxymethylaminomethyl modification enzyme GidA	PS01280	Glucose inhibited division protein A family signature 1.			MQDHRSTNESFDVIVIGGGHAGCEAAITTAKLGFSTALFTINLDRIAWQPCNPAVGGPAKSQLVHEVDALGGIIGKLADETAIQKRILNASRGPAVWALRAQTDKREYSKRMIEILQNTDNLSLKEAMITELDIAKTEQIGLNSKKILKKRIKGVKTFFGSYYSAGSVIITAGTFLEGRIWIGNKSMSAGRSGEQAAQGLTQNLHEIGIKTERLKTGTPARVDKRSIIFDELDIQPSTAADKYFSFDPDIKNNMPQVSCHITRTTTKTHQLIRDNLHLTPIYGGFIDSKGPRYCPSIEDKIVKFADKESHQIFLEPEGINTPEIYVQGFSTGLPENIQLELLRTLPGLGECKMLRPAYAVEYDYIPATQLQTSLETKEIEYLFSAGQINGTTGYEEAAA…
	8563	GC_00000400	Bin_1	JFNG01	102	DETECTED				S							SSF64288	SSF64288							G3DSA:3.40.1410.10	G3DSA:3.40.1410.10					PF01947	Protein of unknown function (DUF98)									MLLGDGSPTRHLQLLTNQETKIKLISMQIDPLFIAEGPKELNQLNGPLIRRQVWIKNNNKNLAWAESWWNAEQVNENLKAKEEPIWKNLTQDRSELFREVDRISLVNSNWLEDQFCFKGPFWSRNYRFFRDKKPLTIIREVFNPHLESLLGYSGIKEFTKLYSSSS
	3638	GC_00001041	Bin_1	JFNG01	103	DETECTED				S											146891.A9601_18861	Viral (Superfamily 1) RNA helicase																			MDSRRIRNLRNSFDKNIVDKQVDKIFETGRQFVDGVSGARPGKRRNSDFQGITSKSVKKVGRWVSEKVDLFFDEDNDDWNDENFYDDNRDIKTFSRESNSYQSAKQHSKRPLEAISLRQSKNLQTTEQKKLPYVKESKDEDWPDEMDFKVERWQRASETEINTSRDQSNQQ-VQSKSRNLPRSRRRRV
	2106	GC_00000457	Bin_1	JFNG01	104	DETECTED		GO:0005575, GO:0005622, GO:0005623, GO:0005737, GO:0044424, GO:0044464		S											167546.P9301_18681	SprT									PF10263	SprT-like family	SM00731	SprT homologues.							MPVIPLLPLFHKFNSQYFENSLAVNNQPLVKVRWSDNRLKTTAGFYKRKRINGLVDSEIILSKPILSKLSTSEINSTLCHEMIHAWVDRILKKNEIHGPNFLEKMNEINKKEKNFQISVRHSFPIERRELKYIGTCQNCGEKFFYRKRIKNIACKKCCVNFFNGSWNKKCLILFD
	8958	GC_00000330	Bin_1	JFNG01	105	DETECTED				S																															MDATLVKDIGIKALLVGGAVLVSFWTFNAVKLVISARGINPLVRKFFDQIAAGRIDAAYGLTTKTYKTHVKRQDFLKFLASLNLNKYRNLKSGRPRVQEDQIIITLNLKSEDKQDELPLDFTFAKTDNDWKIDRIAKVN
	9036	GC_00000511	Bin_1	JFNG01	106	DETECTED				L							SSF56091	SSF56091			74546.PMT9312_1772	ATP-dependent DNA ligase			G3DSA:2.40.50.140	G3DSA:2.40.50.140	COG1793	ATP-dependent DNA ligase		map03410, map03420, map03430, map03450	PF01068	ATP dependent DNA ligase domain					PS00697	ATP-dependent DNA ligase AMP-binding site.			MYKEEIIHQLELHPSRLDKEKIISEAMEQGLDDFFEGIRMALDPLVTFGVKIVPEKENEKSQNFLWKDFRVLANKLIQRELTGHAARDAIITAMESAKKEEWNGFYRRVLIKDLRCGVSEKTINKIAKKFPKYAIPIFSCPLAHDSANHEKKMIGKKQIEIKLDGVRVLTIIRQNKVEMFSRNGKQFHNFGHIISEIENVLKEDPAPHDLVLDGEVMSANFQDLMKQVHRKDGKQTKDAVLHLFDLCPLENFQKGRWNTSQTARSLLVKEWVAKHSMLLRHVKTLEWENVDLDTIEGQKRFVELNKAAVEGGYEGVMIKDPDAMYECKRTHSWLKAKPFIEVTLKVVSVEEGTGRNKGRLGAVLVEGEDDGYEYSLSCGSGFSDIQRQEYWSKRSHLIG…
	2124	GC_00000662	Bin_1	JFNG01	107	DETECTED				S																															MTNKTVFNFIKTPCGQAKYVKLEANKTLLGKFRLLWFILIASIRDWNIKE
	5482	GC_00000743	Bin_1	JFNG01	108	DETECTED		GO:0005575, GO:0005623, GO:0005886, GO:0016020, GO:0044464, GO:0071944		C											146891.A9601_18911	SNARE associated Golgi					COG0398	Uncharacterized membrane protein YdjX, TVP38/TMEM64 family, SNARE-associated domain			PF09335	SNARE associated Golgi protein									MNTFLENIYNFSFFFNTGFGIFLFVCIYILIVLLILPASWLSLLSGFLYGSYLGSIIVFISASIGASVAFFVSKSFFAKKLKNLFSRYPKLSVMEKVVEKGGLKLIFLARLSPIFPFSILNYFYGLNNVKFRDFALGLIGIIPGTFLYCSIGSLAKSIQELKNVQSPNNLYITSVGIISTFLVVYFSAKYSKEYFEKS
	6225	GC_00001222	Bin_1	JFNG01	109	DETECTED		GO:0003674, GO:0003824, GO:0004812, GO:0004832, GO:0005575, GO:0005622, GO:0005623, GO:0005737, GO:0006082, GO:0006139, GO:0006399, GO:0006412, GO:0006418, GO:0006438, GO:0006520, GO:0006725, GO:0006807, GO:0008150, GO:0008152, GO:0009058, GO:0009059, GO:0009987, GO:0010467, GO:0016070, GO:0016874, GO:0016875, GO:0016876, GO:0019538, GO:0019752, GO:0034641, GO:0034645, GO:0034660, GO:0043038, GO:…		J			PR00986	Valyl-tRNA synthetase signature			SSF52374	SSF52374			146891.A9601_18921	amino acids such as threonine, to avoid such errors, it has a posttransfer editing activity that hydrolyzes mischarged Thr-tRNA(Val) in a tRNA-dependent manner (By similarity)	MF_02004	Valine--tRNA ligase [valS].	G3DSA:3.40.50.620	G3DSA:3.40.50.620	COG0525	Valyl-tRNA synthetase		map00970	PF00133	tRNA synthetases class I (I, L, M and V)			TIGR00422	valS: valine--tRNA ligase	PS00178	Aminoacyl-transfer RNA synthetases class-I signature.	Coil	Coil	MTEMNDQLSLENYSPFEVEKKWQEKWESLKAFSPNPEDDGEPFCVVIPPPNVTGSLHMGHAFNTALIDVVVRFQRLLGKNVLCLPGTDHASIAVQTILEKQLKSEGKTSEDIGRDEFLKRAWNWKEQSGGRIVSQLKRIGYSVDWTRERFTLDQKLNEAVIEAFNILYKKNLIYRGEYLVNWCPESQSAVSDLEVEMQEVNGHLWHFKYPLISESGEYLEKYLEVATTRPETLLGDTAVAVNPDDDRYKEFIGLKVKVPFVDREIPIIADSHVDKDFGTGCVKVTPAHDPNDFAIGKRHNLKQINVMNKDGTLNINAGIFHNLDRYEARKKIIKELDNLGLLTKIEDYKHTVPFSDRGKVPIEPLLSTQWFLKMDDISQGCLNEIDSKKPSFIPPRWEK…
	243	GC_00000364	Bin_1	JFNG01	110	DETECTED				S							SSF89360	SSF89360							G3DSA:2.60.300.12	G3DSA:2.60.300.12															MTEIVNLSISQNAASELSRQASFGGSPGEMSIDLVEDKNCSEGWMHIKLRPGTCNGSPISRTEGVTLYADVKKFNLLKDLKLDYYGDLSGGGFLISTPKNAKRCSCGSGFKLL
	3517	GC_00001126	Bin_1	JFNG01	111	DETECTED				S							SSF101386	SSF101386			93060.P9215_19571	MazG family			G3DSA:1.10.287.1080	G3DSA:1.10.287.1080	COG3956	Uncharacterized conserved protein YabN, contains tetrapyrrole methylase and MazG-like pyrophosphatase domain		map00230, map00240, map01100	PF03819	MazG nucleotide pyrophosphohydrolase domain			TIGR00444	mazG: MazG family protein			Coil	Coil	MSSNNRYKLENNSDLETINSFKNLISNIKALKDKTWGCPWQKIQSHISLIPFLYEESNEFIDAIYEKNADNMCEELGDLLLQVMLHAEIGYEEKEFTLNDVIKNLNKKIINRHPYIFNKKEKVSLKKSQQIWVNIKNLEKEAPHMKSSISRNLNLKIKNLPPTVGTGKITNVVKEHGFKWESTDEIFKKLEEEINELKEAIKSKNDSEIKNEFGDIYFTLLNLSNFLKINPDSALQKTNMKFLDRFSIVEEHAGDNIKKQTPKDFQRLWQIAKQKLAGKIP---
	3550	GC_00000704	Bin_1	JFNG01	112	DETECTED		GO:0003674, GO:0003824, GO:0004766, GO:0006576, GO:0006595, GO:0006596, GO:0006807, GO:0008150, GO:0008152, GO:0008216, GO:0008295, GO:0009058, GO:0009308, GO:0009309, GO:0009987, GO:0016740, GO:0016765, GO:0034641, GO:0042401, GO:0044106, GO:0044237, GO:0044249, GO:0044271, GO:0071704, GO:1901564, GO:1901566, GO:1901576		E					PS51006	Polyamine biosynthesis (PABS) domain profile.	SSF53335	SSF53335			146891.A9601_18951	Catalyzes the production of spermidine from putrescine and decarboxylated S-adenosylmethionine (dcSAM), which serves as an aminopropyl donor (By similarity)	MF_00198	Polyamine aminopropyltransferase [speE].	G3DSA:3.40.50.150	G3DSA:3.40.50.150	COG0421	Spermidine synthase		map00270, map00330, map00410, map00480, map01100	PF01564	Spermine/spermidine synthase					PS01330	Polyamine biosynthesis (PABS) domain signature.			MTDITTWIDEYHKGSRFGLNGKILIKKTSKYQEIIVIENEYYGKALMLDGCWMTSLKDEKYYHECLVHPALSSIDEKSNVLIIGGGDGGTVRECVKYSQISTIDLVEIDEEVIKISKKFLEEIAGEAWNDKRLEIHIDDGVKWVKKTKDNFYDVIFIDCSDPSEFSNLLFSHSFYKECKRILAPRGILATQSESPESFKNIHINILKSLKNIFKVSETMYSFVPIYPSGIWSWTFASSEDLSLSKQNYDEVVKIEKGCEIWNLNFQNAAFKMMPNKIVKELDS
	6156	GC_00000981	Bin_1	JFNG01	113	DETECTED				E	PIRSF036979	PIRSF036979			PS51409	Arginase family profile.	SSF52768	SSF52768			146891.A9601_18961	agmatinase			G3DSA:3.40.800.10	G3DSA:3.40.800.10	COG0010	Arginase family enzyme		map00330, map01100	PF00491	Arginase family			TIGR01230	agmatinase: agmatinase					MTKNLFDNENAIYMGAKRSPENCSIGIFGVNYDGTCSFKPGARFGPEAIRQVSSCLETYCPKIKKDLEDIMYVDFGSILIDKNDSKSVIESVKSATNYLISKRLSPIMLGGEHSITRGAIEALVKKYPDLILVQLDAHADLRESYIGNEHSHACTMKRCLEVLPEKKILQVGIRSGTKEEFEIMHNNNQLVNFCPGGNAYELKQALLPYAKSPIYLTIDLDWFDPSLLAGTGTPEPGGFFWNDFEEILKTLKDLRIVGSDIVELSPEIDRSGVSSIVAAKVLRSLILSLENMQ
	4301	GC_00001036	Bin_1	JFNG01	114	DETECTED		GO:0003674, GO:0003824, GO:0004047, GO:0006082, GO:0006520, GO:0006544, GO:0006546, GO:0006807, GO:0008150, GO:0008152, GO:0008168, GO:0009056, GO:0009063, GO:0009069, GO:0009071, GO:0009987, GO:0016054, GO:0016740, GO:0016741, GO:0019464, GO:0019752, GO:0032259, GO:0043436, GO:0044237, GO:0044238, GO:0044248, GO:0044281, GO:0044282, GO:0044710, GO:0044712, GO:0046395, GO:0071704, GO:1901564, GO:…		E	PIRSF006487	PIRSF006487					SSF103025	SSF103025			146891.A9601_18971	The glycine cleavage system catalyzes the degradation of glycine (By similarity)	MF_00259	Aminomethyltransferase [gcvT].	G3DSA:3.30.1360.120	G3DSA:3.30.1360.120	COG0404	Glycine cleavage system T protein (aminomethyltransferase)		map00260, map00670, map00910, map01100	PF01571	Aminomethyltransferase folate-binding domain			TIGR00528	gcvT: glycine cleavage system T protein					------MDLLKSPLYSKYVESNAKLVDFAGWEMPISFSGLIKEHESVRYSAGLFDISHMGVISIKGINPKDYIQKLFPTNLYSFCEGQGLYTVMLNDKGGIIDDLIIYDLGIQKNDISELLLIVNANRYEEDFQWIKNNLNISEISITNFKKDKVLLALQGKNSFGLFEEWIESSISHIPNFGCEYKIFEHISPKEKIFFSKTGYTGENGLEILLSKKAAINLWDFSISKNVAPCGLGARDTLRLEAGMHLYGQDINEETSPYEAGLGWLVHLENNHEFIGRRVLEEQSRLGIQKKLVGLSIKGKAIGRKGCAVLKGDENIGTITSGSWSPTKQQAIAFAYINTSHALINNEVEILIRGKKFNGVITKRAFYKKNY
	2524	GC_00001157	Bin_1	JFNG01	115	DETECTED		GO:0003674, GO:0003824, GO:0004812, GO:0004815, GO:0005575, GO:0005618, GO:0005622, GO:0005623, GO:0005737, GO:0005829, GO:0006082, GO:0006139, GO:0006399, GO:0006412, GO:0006418, GO:0006422, GO:0006520, GO:0006725, GO:0006807, GO:0008150, GO:0008152, GO:0009058, GO:0009059, GO:0009987, GO:0010467, GO:0016070, GO:0016874, GO:0016875, GO:0016876, GO:0019538, GO:0019752, GO:0030312, GO:0034641, GO:…		J			PR01042	Aspartyl-tRNA synthetase signature	PS50862	Aminoacyl-transfer RNA synthetases class-II family profile.	SSF55681	SSF55681			146891.A9601_18981	aspartyl-trna synthetase	MF_00044	Aspartate--tRNA(Asp) ligase [aspS].	G3DSA:3.30.930.10	G3DSA:3.30.930.10	COG0173	Aspartyl-tRNA synthetase		map00970	PF00152	tRNA synthetases class II (D, K and N)			TIGR00459	aspS_bact: aspartate--tRNA ligase					MRNKICEELNNTDIGKLVNLCGWVDRRRDHGGVIFIDLRDYSGFLQITINPDDGADLFKQAETLRNETVIMVSGIINERPKDSINTNLSTGELELKVKDLQILNQIKNNLPFPVSIHDYENTKEELRLKYRYLDLRRGKLLKNLKTRHKIIKVAREFLDNFGFTEVETPLLTKSTPEGARDFLVPARLSNGEFFALPQSPQLFKQLLMVGGLDKYYQIAKCFRDEDLRADRQPEFTQLDIEMSFISEEEIISFNESLIKKIWKEVLNINFNNAFPRMTWHAAMDNYGTDRPDTRYQMLLKDLGGVLGNIGFNIFTKAIKSGGYIKSITVKGGNSSISNVRIKPGGDIFKVAQDAGAGGLAFIRVKGDELETIGAIKNNLSEEHIVDILKITEAKDGDLI…
	7934	GC_00001227	Bin_1	JFNG01	116	DETECTED		GO:0003674, GO:0003824, GO:0003883, GO:0005575, GO:0005622, GO:0005623, GO:0005737, GO:0005829, GO:0005886, GO:0006139, GO:0006213, GO:0006220, GO:0006221, GO:0006241, GO:0006725, GO:0006753, GO:0006793, GO:0006796, GO:0006807, GO:0008150, GO:0008152, GO:0009058, GO:0009116, GO:0009117, GO:0009119, GO:0009141, GO:0009142, GO:0009147, GO:0009148, GO:0009163, GO:0009165, GO:0009199, GO:0009201, GO:…		F					PS51273	Glutamine amidotransferase type 1 domain profile.	SSF52540	SSF52540			146891.A9601_18991	Catalyzes the ATP-dependent amination of UTP to CTP with either L-glutamine or ammonia as the source of nitrogen (By similarity)	MF_01227	CTP synthase [pyrG].	G3DSA:3.40.50.300	G3DSA:3.40.50.300	COG0504	CTP synthase (UTP-ammonia lyase)		map00240, map01100	PF06418	CTP synthase N-terminus			TIGR00337	PyrG: CTP synthase					MSKFVFVTGGVVSSIGKGIVAASLGRLLKSRGYSVSILKLDPYLNVDPGTMSPFQHGEVFVTEDGAETDLDLGHYERFTDTAMTRLNSVTTGSIYQAVINKERRGSYDGGTVQVIPHITGEIRERIHRVAANSNAEIIITEIGGTVGDIESLPFLEAIREFKNDVNRNDVAYIHVTLLPYIKTSGEIKTKPTQHSVKELRSIGIQPDLLVCRSDKSINEALKKKLSGFCGVSINSVIEALDEDSIYSVPLSLKKEGLCKETLKYLDLEDKKCDLKNWEHLIHNLRNPGAPIKVALVGKYIELGDAYLSVVEALRHACIEQKALLDLHWVSAEMIEKNSAETYLNKVDAIVVPGGFGNRGVNGKISAIKFARENKIPFLGLCLGMQCAVIEWARNVANLP…
	7675	GC_00000336	Bin_1	JFNG01	117	DETECTED				O	PIRSF000370	PIRSF000370					SSF102114	SSF102114			146891.A9601_19001	Catalyzes the conversion of 6-carboxy-5,6,7,8- tetrahydropterin (CPH4) to 7-carboxy-7-deazaguanine (CDG) (By similarity)	MF_00917	7-carboxy-7-deazaguanine synthase [queE].	G3DSA:3.20.20.70	G3DSA:3.20.20.70	COG0602	Organic radical activating enzyme		map00790, map01100	PF13394	4Fe-4S single cluster domain									#NAME?
	5581	GC_00001070	Bin_1	JFNG01	118	DETECTED				S	PIRSF006293	PIRSF006293					SSF52402	SSF52402			146891.A9601_19011	Catalyzes the ATP-dependent conversion of 7-carboxy-7- deazaguanine (CDG) to 7-cyano-7-deazaguanine (preQ(0)) (By similarity)	MF_01633	7-cyano-7-deazaguanine synthase [queC].	G3DSA:3.40.50.620	G3DSA:3.40.50.620	COG0603	7-cyano-7-deazaguanine synthase (queuosine biosynthesis)		map00790, map01100	PF06508	Queuosine biosynthesis protein QueC			TIGR00364	TIGR00364: queuosine biosynthesis protein QueC					MTLKNKSIVVLLSGGLDSSTVTGIAKNSEAKIFGLSFDYGQRHKKELNSASIIAKHFDIDEFKIIKLDLSLWGGSSLTDTQKNIPIEGVQTNKIPNTYVPGRNTIFISVALSYAEAIDADFIGLGVNALDYSGYPDCRPDYIKKFQELADLANKRGRENNPIKLWTPLLDLNKEEIIKLAIDNHVPLDKTWSCYSGNSKPCGKCDSCRIRNAAYEKWLNNNNKK
	7842	GC_00000944	Bin_1	JFNG01	119	DETECTED		GO:0003674, GO:0003824, GO:0005575, GO:0005622, GO:0005623, GO:0006082, GO:0006520, GO:0006575, GO:0006725, GO:0006732, GO:0006760, GO:0006807, GO:0008150, GO:0008152, GO:0008483, GO:0009058, GO:0009356, GO:0009987, GO:0016740, GO:0016769, GO:0019752, GO:0032991, GO:0042558, GO:0043234, GO:0043436, GO:0044237, GO:0044238, GO:0044249, GO:0044281, GO:0044424, GO:0044464, GO:0044710, GO:0046483, GO:…		E, H			PR00095	Anthranilate synthase component I signature			SSF56322	SSF56322			146891.A9601_19021	p-aminobenzoate synthetase			G3DSA:3.60.120.10	G3DSA:3.60.120.10	COG0147	Anthranilate/para-aminobenzoate synthases component I		map00790	PF00425	chorismate binding enzyme							Coil	Coil	MKIKKIVLEKWIDPALISHHLTKKFGDKGLAWLDSDGKENGEWSIIGIKPKKIIQSRDINNLDKTNNPFNNLRNIEKGFWMGWLSYEAGVYIEPKNPWKKTNMATLWIASYDPIIKCNLIKKEIIIEGTNSSELMNYKNIINNIKNIEEENIIKTKLNFDFSKINLDEMAEKFQKNILKLKKLISLGDIFQANLTTKCEVESSKNYNPLDIYLKIRRKLRAPFGGIII-NN-NYKEAVLSTSPERFLKIDNKNFVESRPIKGTRSRDKDLNQDALNAIDLITNEKDRAENIMIVDLIRNDLSKVCETGSIMVPEILKLESFLKVHHLTSVIRGKLKKDTNWIDLLKACWPGGSITGAPKLRSCQRLFELEECERGPYCGSFLKLDWNGEFDSNILIRSF…
	4640	GC_00001032	Bin_1	JFNG01	120	DETECTED				E, H							SSF56752	SSF56752			146891.A9601_19031	Aminotransferase class IV			G3DSA:3.20.10.10	G3DSA:3.20.10.10	COG0115	Branched-chain amino acid aminotransferase/4-amino-4-deoxychorismate lyase		map00790	PF01063	Amino-transferase class IV									MIETLGWHKDQWLDIDRIFIAANNRGLKFADGIFETILIKENKPILFDEHLKRLEKSSKILNINLKINKLTLRQLIHDGIKKLSLKNDQFASVRINYSRGTNEGRTLRINSTLETKNLDNLWLEFYRIKPNFNPINVCISQTEKINEFSLMSKCKTFSYNQAIQVLTEANEKSFDDSILLNTSGELCCGSTFNLLIKRNNQWITPRKESGCLEGIMVSQALKLKIVKEELIPPEFQNDDIIVAINSLSCRQIYQVDDLKLKPKFDPIYFWDLLYS
	3917	GC_00001002	Bin_1	JFNG01	121	DETECTED		GO:0003674, GO:0003824, GO:0004851, GO:0004852, GO:0005575, GO:0005618, GO:0005623, GO:0005886, GO:0006725, GO:0006778, GO:0006779, GO:0006807, GO:0008150, GO:0008152, GO:0008168, GO:0008169, GO:0008757, GO:0009058, GO:0009987, GO:0016020, GO:0016740, GO:0016741, GO:0016829, GO:0016835, GO:0016836, GO:0018130, GO:0019438, GO:0030312, GO:0032259, GO:0033013, GO:0033014, GO:0034641, GO:0044237, GO:…		H							SSF53790	SSF53790			146891.A9601_19041	Multifunctional enzyme that catalyzes the SAM-dependent methylation of uroporphyrinogen III at position C-2 and C-7 to form precorrin-2 and then position C-12 or C-18 to form trimethylpyrrocorphin 2. It also catalyzes the conversion of precorrin-2 into siroheme. This reaction consists of the NAD- dependent oxidation of precorrin-2 into sirohydrochlorin and its subsequent ferrochelation into siroh…			G3DSA:3.30.950.10	G3DSA:3.30.950.10	COG0007	Uroporphyrinogen-III methylase (siroheme synthase)		map00860, map01100, map01110	PF00590	Tetrapyrrole (Corrin/Porphyrin) Methylases			TIGR01469	cobA_cysG_Cterm: uroporphyrinogen-III C-methyltransferase	PS00840	Uroporphyrin-III C-methyltransferase signature 2.			MEIIVPGIVYLVGAGPGDPELLTLKALRLIKNCDALVHDALIPEEITKEAGLNTEIFHVGKRAGKCSVPQVETNDLILKLAKEGKNVVRLKGGDPFVFSRGGEEVSILEKNGISVEIVPGITSGIAAPSYFGIPLTHRDAASSVTFVTGHERVDREKKTVNWRDLAKSSDSLVIFMGIKNIEFIVEELILGGLDKSTKCAVIQEATLKNQKCLIEKLENLPDKIKDKEFLAPSIIIIGKIVEFKVNNNITKVSDVYLPDINKVQLYNKSQK
	821	GC_00001120	Bin_1	JFNG01	122	DETECTED				G			PR01035	Tetracycline resistance protein signature	PS50850	Major facilitator superfamily (MFS) profile.	SSF103473	SSF103473			93060.P9215_19681	Major Facilitator superfamily			G3DSA:1.20.1250.20	G3DSA:1.20.1250.20	COG0477	MFS family permease			PF07690	Major Facilitator Superfamily									MKVNIVKESLLKPNKKFTILSAFVTLLNDRLSESILLPILPSFVLLFDSKASTYGLLSCTYQLAQFTASPFIGLMSDRYGRRPVTLFCITGSVIGISILSFTVLFNWSNSIATIPLFLLFLARLIDGLSGGTAATATTILADISSPEKRAKTFGLIGVAFGLSFFLGNIFVVIFARNTNNNFIIPVLIASIIPIINFILVFFYLPETKPNSEKNISKTVLKNPLKALFTVFKEEKIKKLSLAFFIYFIAFTGLTNILIFFLQESLNWTTKASSGTLVVVGIIAIIVQGGLIGPLVKQFGEMRLTLIGSGFILVACALLITAPKENATINIYSAVSFLAVGAGLITPTLRALISKKLDVDKQGSILSNLQGLQSLGGVLGVAMAGRVYDSFGPKSPFIAG…
	6243	GC_00000745	Bin_1	JFNG01	123	DETECTED		GO:0000287, GO:0001666, GO:0003674, GO:0003824, GO:0005488, GO:0005575, GO:0005623, GO:0005886, GO:0006464, GO:0006468, GO:0006793, GO:0006796, GO:0006950, GO:0006979, GO:0007154, GO:0008150, GO:0008152, GO:0008976, GO:0009267, GO:0009405, GO:0009605, GO:0009628, GO:0009987, GO:0009991, GO:0015968, GO:0016020, GO:0016301, GO:0016310, GO:0016740, GO:0016772, GO:0016776, GO:0019538, GO:0031667, GO:…		P	PIRSF015589	PIRSF015589					SSF56024	SSF56024			74546.PMT9312_1789	Catalyzes the reversible transfer of the terminal phosphate of ATP to form a long-chain polyphosphate (polyP) (By similarity)	MF_00347	Polyphosphate kinase [ppk].	G3DSA:3.30.870.10	G3DSA:3.30.870.10	COG0855	Polyphosphate kinase		map00190, map03018	PF13090	Polyphosphate kinase C-terminal domain			TIGR03705	poly_P_kin: polyphosphate kinase 1			Coil	Coil	MKSQADVFINRELSWIEFNKRVLLTGMEKEYKILDKVKFCSIFSNNLDEFFMVRVASLKAQVEAGITKKSIDGLTPKEQLTKINKEVKSLTNLQENYINNELNNELKEKGVILKKYRDLSENQRNWCNNYFTSSIFPLLTPLVVDPAHPFPFISNLSLNLAALIRDGEDSKNQFVRVKIPTKNINRFIQIPNEIIQYGDESTYFFISVEDLIGNNINTLFSGMECINYSFFRVTRDADLELKELEADDLLLAVEQSLQKRRLGGDVVRLEVESDMPENILKLLIESISIQKEYIYFSKSFLGLDDLNQLTKINRDDLKENLLIGKTHPKLKNLDLSSNKNLNSIFHILRKKNILLHHPYDLFRTSVEEFINKAADDPLVMAIKITLYRVSKDSPIIAAL…
	3195	GC_00000181	Bin_1	JFNG01	124	DETECTED				K			PR00046	Major sigma-70 factor signature			SSF88946	SSF88946			146891.A9601_19071	Sigma factors are initiation factors that promote the attachment of RNA polymerase to specific initiation sites and are then released (By similarity)			G3DSA:1.10.601.10	G3DSA:1.10.601.10	COG0568	DNA-directed RNA polymerase, sigma subunit (sigma70/sigma32)			PF04542	Sigma-70 region 2			TIGR02997	Sig70-cyanoRpoD: RNA polymerase sigma factor, cyanobacterial RpoD-like family	PS00716	Sigma-70 factors family signature 2.	Coil	Coil	MGIPLESGKSSSDNNFDEPRLPNTAGKSRKSKSSL-------------------------------TAKQSQKKSGRLASDSIGYYLSSIGRVPLLTPAEEIELAHHVQNMKKLL-------------------------------QIPETDRS-----QRNLY--------------------------------------QIKIGKRSRDRMMAANLRLVVSVAKKYQNQGLELLDLVQEGAIGLERAVDKFDPAMGYKFSTYAYWWIRQGMTRAIDNSARTIRLPIHISEKLSKMRRVSRELSHKFGRQPTRLEMATEMGIDQKDLEDLISQSAPCASLDAHARGEEDRSTLGELIPDPNCEEPMEGMDRTIQKEHLGTWLSQLNEREQKIMKLRF…
	416	GC_00000791	Bin_1	JFNG01	125	DETECTED				I											74546.PMT9312_1791	Phosphatidate cytidylyltransferase					COG0170	Dolichol kinase													MIKFSVILLYLFSIFLISIVFKKFN-KDSREVVRKIIHIGIGPLIPIAQFLEINQNSALIFTGIVSLMVFINYTYKLFPTIEDVERKSYGTLFYCLSLFILIYLFWDKDPYALISGFFIMTFGDGLAGLIGKSFDSKSWIFFKQKKSLLGTMTMFLTSLIVVCSIGYAQQNNLNLNYFTVAFFATLLEQFSVLGIDNLIVPISSALFFNFFITS
	1790	GC_00000628	Bin_1	JFNG01	126	DETECTED		GO:0003674, GO:0003824, GO:0003849, GO:0005575, GO:0005622, GO:0005623, GO:0005737, GO:0006082, GO:0006520, GO:0006725, GO:0006807, GO:0008150, GO:0008152, GO:0008652, GO:0009058, GO:0009072, GO:0009073, GO:0009423, GO:0009987, GO:0016053, GO:0016740, GO:0016765, GO:0019438, GO:0019752, GO:0043436, GO:0043648, GO:0043650, GO:0044237, GO:0044238, GO:0044249, GO:0044281, GO:0044283, GO:0044424, GO:…		E	PIRSF001361	PIRSF001361					SSF51569	SSF51569			146891.A9601_19091	Stereospecific condensation of phosphoenolpyruvate (PEP) and D-erythrose-4-phosphate (E4P) giving rise to 3-deoxy-D- arabino-heptulosonate-7-phosphate (DAHP) (By similarity)			G3DSA:3.20.20.70	G3DSA:3.20.20.70	COG0722	3-deoxy-D-arabino-heptulosonate 7-phosphate (DAHP) synthase		map00400, map01100, map01110, map01230	PF00793	DAHP synthetase I family			TIGR00034	aroFGH: 3-deoxy-7-phosphoheptulonate synthase					MTTSSNNSALEKTSDLHVVETRPLIPPSRLHNDIPLDHASANTVSKTRRSIQNILHHNDHKLLVIVGPCSIHDLDAAKEYSKYIQNFREIYKDKLEIIMRVYFEKPRTTIGWKGLINDPHLDDSYDINTGLRRARTLLSYLATRGIPSATELLDPIVPQYIADLISWTAIGARTTESQTHREMASGLSMPIGFKNGTDGSFTTAINAMQSASKSHHFLGVNENGMASIVNTTGNPDGHIVLRGGSKGPNFESDHVKRISAELRQCNLPHKVMIDCSHGNSNKDFRKQSEVLKNVASQISNGEKNILGVMLESHLKEGNQKLLKKEDLQFGRSITDACIDIETTKELLAILYNSISSL
	4570	GC_00000848	Bin_1	JFNG01	127	DETECTED		GO:0003674, GO:0003676, GO:0003723, GO:0003729, GO:0003730, GO:0003824, GO:0003994, GO:0005488, GO:0005975, GO:0006081, GO:0006082, GO:0006091, GO:0006097, GO:0006099, GO:0006417, GO:0006629, GO:0006631, GO:0008150, GO:0008152, GO:0009056, GO:0009060, GO:0009062, GO:0009889, GO:0009987, GO:0010468, GO:0010556, GO:0010608, GO:0015980, GO:0016042, GO:0016054, GO:0016829, GO:0016835, GO:0016836, GO:…		C	PIRSF036687	PIRSF036687					SSF53732	SSF53732			74546.PMT9312_1793	Aconitate hydratase 2			G3DSA:3.20.19.10	G3DSA:3.20.19.10	COG1049	Aconitase B		map00020, map00630, map00640, map00720, map01100, map01110, map01120, map01210, map01230	PF06434	Aconitate hydratase 2 N-terminus			TIGR00117	acnB: aconitate hydratase 2	PS01244	Aconitase family signature 2.			MKNLETLLKDYADHVAERATKGIPPLPLNAEQTNCITQLLEQDSTYDSSYLLDLLINRVPPGVDEAAYVKASWLTAIVYSEKYCKSINPEKAIEILGTMIGGYNVNSLVEILKGKNSLLAKKAAEVLKNIILVYDSANEIFELSQNNIYAKEVVNSWANAEWFTNKKVLEKEITCLVFKVDGETNTDDLSPAVHATTRPDIPMHALAMLEFKKPDGLKILDNLKKQNLPIAYVGDVVGTGSSRKSAINSLIWHIGEDIAFVPNKKTGGIIIGSKIAPIFFNTAQDSGALPIEADVSHMKTGDVIKIYPYKGVIKKIEKDSNSEKIISKFDLYPSTLTDEIQAGGRINLMIGRSLTDKIRNKLDYQSSEIFTRPQNPTESNAGFTQAQKIVGKACGLDGV…
	5668	GC_00001225	Bin_1	JFNG01	128	DETECTED				P			PR00762	Chloride channel signature			SSF81340	SSF81340			74546.PMT9312_1794	Chloride channel			G3DSA:1.10.3080.10	G3DSA:1.10.3080.10	COG0038	H+/Cl- antiporter ClcA			PF00654	Voltage gated chloride channel									MPNLIKDNIQKTGNNSSRTIKKLLKQRSLVVVFSLLLTGLGASITSIFFKTGIYFINNWRLALLDQFPSIAVLPIFGALGGAIAGYLIKNIAPAAKGSGVSQIMGFLRHKKVPMNIRVGLVKLISGIIAIGSGFPLGPEGPSVQMGGSVAWQMAKWLKAPTAFRRVIVAAGGGAGIAAVFSAPLGGFVYAIEELLNSARPVILLLVIITTFIADSSADIIQALGLDPKAGGFDFNLGFLIQKEYDPSVFFLPIDFIYLVLLGIIIGIFAELYSRFVLFMQNLGKKWYKNKFVLKMSICGLILGSIYAFLPNTFHNLDELQKIIAEQNTSIGIALLAVLVLFITTGLAAASGAPGGLFYPMLTLGGSIGLIIGSWVEIVTGHAPSTYIFAGMGAFVAGCS…
	4807	GC_00001110	Bin_1	JFNG01	129	DETECTED				F	PIRSF036480	PIRSF036480	PR01575	Formyltetrahydrofolate deformylase signature			SSF53328	SSF53328			167546.P9301_18931	formyltetrahydrofolate deformylase	MF_01927	Formyltetrahydrofolate deformylase [purU].	G3DSA:3.40.50.170	G3DSA:3.40.50.170	COG0788	Formyltetrahydrofolate hydrolase		map00630, map00670	PF00551	Formyl transferase			TIGR00655	PurU: formyltetrahydrofolate deformylase					MEHPSIIFKIVCPDRPGLVSLLTSWISNYGGNIKHSDHHTDQDAGLFLSRIEWNSNNESFNRDEIYKEFEKIADAVNGKFNVNYSDEITNVAIFVSKQNHCLIDLLWRVRNGELKMKVPLIISNHSDLENIANDFNAKFVHIDTFKTDKSIVEDQFLYLLKKYEIDLVVLAKYMQILSDSFLKKFSSIINIHHSFLPAFKGGQPYHRAWKRGVKLIGATAHYVTEDLDEGPIIEQCTVNVSHRDEIDDLIRKGRDIERIALARAVRLHLNHQVFVYNRKTAVFD
	3288	GC_00000811	Bin_1	JFNG01	130	DETECTED				E							SSF51905	SSF51905			74546.PMT9312_1796	d-amino acid oxidase			G3DSA:3.50.50.60	G3DSA:3.50.50.60	COG0665	Glycine/D-amino acid oxidase (deaminating)		map00260, map00311, map00330, map00472, map00730, map01100, map04146	PF01266	FAD dependent oxidoreductase									MKSLKENFQKAHIVIVGSGIIGKFNALELSELGFQVTIIDPAQHQNSSNASLGLLMGNMYQKRKGRSWDLRKQSIELWPQWITFLQKFNYELNIEKPLIQLTTDEEKFKKLEKFVYENNDQNLQILERDSIIIKNINKAFQANNIKGMISFKDGRINPFSLLQTLDKYLEHNKVNYLQEKIIKIRKSNNQWNSITRNNKNIKSDIVILCNSLKAIDLIDNLSHNIKLKPVLGQAIEIEINDAEVDLLSLPKQFNINGKNIIPKSNNKLIIGSTDEYSTKPEENTHEKLTNFLDKRPNWLMRGKISKKWYGIRSRPDGEPSPIMKNLEDGVIICTGFYKNGILLAPACSKWVANEIKNYLY
	3491	GC_00000961	Bin_1	JFNG01	131	DETECTED				O			PR00301	70kDa heat shock protein signature			SSF53067	SSF53067			146891.A9601_19141	Acts as a chaperone (By similarity)	MF_00332	Chaperone protein DnaK [dnaK].	G3DSA:2.60.34.10	G3DSA:2.60.34.10	COG0443	Molecular chaperone DnaK (HSP70)		map03018, map05152	PF00012	Hsp70 protein			TIGR02350	prok_dnaK: chaperone protein DnaK	PS00297	Heat shock hsp70 proteins family signature 1.	Coil	Coil	----------MGKVVGIDLGTTNSCVAVMEGGKPTVIANAEGFRTTPSVVAYTKNQDQLVGQIAKRQAVMNPENTFYSAKRFVGRRVDEVNEESKEVSYSVEKSGSSVKLKCPILDKQFSPEEVSSQVLRKLADDAGKYLGDKVTQAVITVPAYFNDSQRQATKDAGKIAGLEVLRIVNEPTAAALAYGLDKENEKILVFDLGGGTFDVSVIEAGDGVTEVLSTSGDTHLGGDDFDRCIVDHLANTFKSNEGIDLRQDKQALQRLTEAAEKAKIELSNATQSEINLPFITATPEGPKHLDLNLTRVKFEELAASLIDRCKTPVERAISDAKISTSEIDEVVMVGGSSRIPAVLDLVKKIIGKEPNQTVNPDEVVAVGAAIQGGVLAGEVKDILLLDVTP…
	8903	GC_00000812	Bin_1	JFNG01	132	DETECTED				E							SSF51735	SSF51735			167546.P9301_18961	shikimate dehydrogenase	MF_00222	Shikimate dehydrogenase (NADP(+)) [aroE].	G3DSA:3.40.50.720	G3DSA:3.40.50.720	COG0169	Shikimate 5-dehydrogenase		map00400, map01100, map01110, map01230	PF08501	Shikimate dehydrogenase substrate binding domain			TIGR00507	aroE: shikimate dehydrogenase					MISSKTSFIALIGNPVSHSLSPIMQNAALQHLGLDLIYIAVPCKDEDLELILNSFKKINCIGLNVTIPHKEKVFNLCSEISPIANKLKAINTLKLNSEKEWSATNTDVEGFIYPLKNLNLAKKKSIVLGSGGAARSVIQGLINLNLSTISVISRNKSSLDELIKNFDNQIQLQGLLHSDDQAQNLIEEADLVVNTTPVGMKTAKNKMNLLPYGDYFWRSLSSKTIVYDLIYNPAPTHLLKFSANKGCMTIDGLQMLVAQGLKSLSFWTNGLEVPFNVMNDALKNHL-------
	188	GC_00001014	Bin_1	JFNG01	133	DETECTED				J							SSF54995	SSF54995			93060.P9215_19791	Binds together with S18 to 16S ribosomal RNA (By similarity)	MF_00360	30S ribosomal protein S6 [rpsF].	G3DSA:3.30.70.60	G3DSA:3.30.70.60	COG0360	Ribosomal protein S6		map03010	PF01250	Ribosomal protein S6			TIGR00166	S6: ribosomal protein bS6	PS01048	Ribosomal protein S6 signature.			MTNQQSYYETMYILRPDIAEDEVANHIDKYNKLLEEFGGTILDSQMRGKRRLAYQIAKHREGIYVQLSHQGDGQHIFKIEKAMRLSEDVIRYMTVKQEGPLPTPRPSTKNSNQTNDKENPETKVESKEEQPVASADTSTAGKSDNETKDNAES
	8380	GC_00000742	Bin_1	JFNG01	134	DETECTED		GO:0005575, GO:0005622, GO:0005623, GO:0005737, GO:0005829, GO:0005886, GO:0008150, GO:0016020, GO:0040007, GO:0044424, GO:0044444, GO:0044464, GO:0071944		E							SSF69864	SSF69864			167546.P9301_18981	Citrulline--aspartate ligase	MF_00005	Argininosuccinate synthase [argG].	G3DSA:3.90.1260.10	G3DSA:3.90.1260.10	COG0137	Argininosuccinate synthase		map00250, map00330, map01100, map01110, map01230	PF00764	Arginosuccinate synthase			TIGR00032	argG: argininosuccinate synthase	PS00565	Argininosuccinate synthase signature 2.			MQQVKKVVLAYSGGVDTSVCIPYLKNEYGISEVVTFVADLGQGEDLELIRQKALNSGASQSIVGNLVNSFVERYAFPAIRANALYLDKYPLSTALARPLIAENLVNIAREFSADAVAHGCTGKGNDQVRFDLAINALGPDLKIITPAREWNMSREEAIVYGEKFGIPAPVSKKSPYSIDVNLLGRSIEAGILEDPMKEAPEDIFAMTSSIDNSPDSPQEIEIIFKNGLPVGINDESLTPVEIIKKANVLAGEHGFGRIDMIEDRVVGIKSREIYETPGLLLLIKAHKELESITLNPDVVDFKGIVEKKWGQLVYQGFWFGPLKDSLDSFISSTQTSVNGRVKIRLHKGNAIVIGRMSENNSLYREELATYSKDDVFNHSLAEGFIYMWGMSNKIWAELN…
	8911	GC_00000458	Bin_1	JFNG01	135	DETECTED				S																					PF11332	Protein of unknown function (DUF3134)									MYYLIYRTKPLMDSNKLKLRLDDISEVNPALTCYHRDDPAPVLPLREEPDLLSWLENTGRLVSEKDGDSQEISTIEEEELSALMGEKEDYKTEEDPSLEDDWED
	3884	GC_00001104	Bin_1	JFNG01	136	DETECTED		GO:0000270, GO:0003674, GO:0003824, GO:0005575, GO:0005623, GO:0005886, GO:0006022, GO:0006023, GO:0006024, GO:0006807, GO:0008150, GO:0008152, GO:0008963, GO:0009058, GO:0009059, GO:0009252, GO:0009273, GO:0009987, GO:0016020, GO:0016740, GO:0016772, GO:0016780, GO:0030203, GO:0034645, GO:0042546, GO:0043170, GO:0044036, GO:0044038, GO:0044085, GO:0044237, GO:0044249, GO:0044260, GO:0044464, GO:…		M											167546.P9301_19001	First step of the lipid cycle reactions in the biosynthesis of the cell wall peptidoglycan (By similarity)	MF_00038	Phospho-N-acetylmuramoyl-pentapeptide-transferase [mraY].			COG0472	UDP-N-acetylmuramyl pentapeptide phosphotransferase/UDP-N-acetylglucosamine-1-phosphate transferase		map00550, map01100	PF00953	Glycosyl transferase family 4			TIGR00445	mraY: phospho-N-acetylmuramoyl-pentapeptide-transferase	PS01348	MraY family signature 2.			MIGKIKKFNFESLFIINTFALIVTSYFFNNFIFTGVYILFFFISIFTTKNGLKIIKKFNLLQNIRNEGPANHFKKSDTPTMGGIFMIVPFLILLLLITINLGSLKLFLLLLSIFGFFITGFVDDFLSIKKKENTGLKTKEKFFLQSVISIIFILLAYEKNLISPLITVSDSWEINMNIFILPVSFFVLVGISNSVNLTDGLDGLAAGCSGIVFYGLGTEILLKDQQELFVFSILCFAMSGICLGFLKYNIYPAKIFMGDTGSLSIGAMLGSIALLTNSVFTLSIFSGIFIIESLSVMIQVGFFKITKKLFHRGKRIFLMAPLHHHFELKGVKEQKIVENFWKINILLVILGIVLKINL
	7278	GC_00000413	Bin_1	JFNG01	137	DETECTED				S																															MNFFTWKDNGLTSDCSSLDAMASRFEETANLMKKLSKKGFKLKKTQNNQLILHPDPEVFDQWGFISEEVPFKQLCLMSDEE--------------
	5616	GC_00000865	Bin_1	JFNG01	138	DETECTED		GO:0003674, GO:0003824, GO:0005975, GO:0005984, GO:0008150, GO:0008152, GO:0009058, GO:0009311, GO:0009312, GO:0009987, GO:0016051, GO:0016740, GO:0016757, GO:0016758, GO:0034637, GO:0044237, GO:0044238, GO:0044249, GO:0044262, GO:0044723, GO:0046351, GO:0071704, GO:1901576		M							SSF53756	SSF53756			167546.P9301_19011	synthase			G3DSA:3.40.50.2000	G3DSA:3.40.50.2000	COG0438	Glycosyltransferase involved in cell wall bisynthesis		map00500, map01100	PF00534	Glycosyl transferases group 1			TIGR02472	sucr_P_syn_N: sucrose-phosphate synthase, putative, glycosyltransferase domain					MKLKFLHLHLHGLIRSKNLELGRDADTGGQTQYVLELIKSLANTTEVDQVDLVTRLINDPKVEDEYSQEEEFVEPGVRILRFKFGPNKYLRKELLWPYLDNLIEKLISYYKKNKKPNFIHAHYADAGYVGVKLSKSLDVPLIFTGHSLGREKKRKLLDTGLKNNQIEKLYSISKRIEAEEKALKSADIVVTSTKQESVYQYSQYSSFSPHKAKVIPPGVDHNKFHHIHSTSETAEIDNMMKPFLKDSTKPPFLTISRAVRRKNIPALIEAYGRSEKLKRKTNLILILGCRESTSKLDPQQKEVFNNIFETIDKYNLYGKVAYPKKHLPSQIPALYRWAASRGGVFVNPALTEPFGLTLLEASSCGLPIISTNDGGPKEIRSKCENGLLVDVTDINELKA…
	4398	GC_00000822	Bin_1	JFNG01	139	DETECTED		GO:0000018, GO:0005575, GO:0005618, GO:0005622, GO:0005623, GO:0005737, GO:0005829, GO:0005886, GO:0006950, GO:0006974, GO:0008150, GO:0009607, GO:0009892, GO:0009987, GO:0010605, GO:0016020, GO:0019219, GO:0019222, GO:0030312, GO:0031323, GO:0031324, GO:0033554, GO:0044403, GO:0044419, GO:0044424, GO:0044444, GO:0044464, GO:0044699, GO:0044763, GO:0045910, GO:0045934, GO:0048519, GO:0048523, GO:…		L					PS50893	ATP-binding cassette, ABC transporter-type domain profile.	SSF52540	SSF52540			146891.A9601_19211	The UvrABC repair system catalyzes the recognition and processing of DNA lesions. UvrA is an ATPase and a DNA-binding protein. A damage recognition complex composed of 2 UvrA and 2 UvrB subunits scans DNA for abnormalities. When the presence of a lesion has been verified by UvrB, the UvrA molecules dissociate (By similarity)	MF_00205	UvrABC system protein A [uvrA].	G3DSA:3.40.50.300	G3DSA:3.40.50.300	COG0178	Excinuclease UvrABC ATPase subunit		map03420					TIGR00630	uvra: excinuclease ABC subunit A	PS00211	ABC transporters family signature.			MVNKVDSSFGEDNSINIRGARQHNLKNIDLSLPRNKFIVFTGVSGSGKSSLAFDTIFAEGQRRYVESLSAYARQFLGQVDKPDVDNIEGLSPAISIDQKSTSHNPRSTVGTVTEIQDYLRLLFGRAGEPHCHHCGIPIAPQTIDEMVDQILLLPEGTRYQLLAPVVRGKKGTHTKLISGLAAEGFARVRINGEVRELADSIELDKNQIHNIEVVVDRLIAREGIQERLNDSLQTCLKRGDGLAIVEVVPKKGENLPSNLEREKLYSENYACPVHGSIVEELSPRLFSFNSPYGACPDCHGIGYLKKFTADRVIPDKTLPVYAAIAPWSEKDNTYYFSLLYSVGQAYGFELKTPWKDLSDLQKKVLLLGSDKPILIQADSRFKTSSGFERPFEGILPILE…
	1802	GC_00001022	Bin_1	JFNG01	140	DETECTED		GO:0000724, GO:0000725, GO:0005575, GO:0005618, GO:0005622, GO:0005623, GO:0005737, GO:0006139, GO:0006259, GO:0006281, GO:0006302, GO:0006310, GO:0006725, GO:0006807, GO:0006950, GO:0006974, GO:0007154, GO:0008150, GO:0008152, GO:0009295, GO:0009432, GO:0009605, GO:0009987, GO:0009991, GO:0030312, GO:0031668, GO:0033554, GO:0034641, GO:0043170, GO:0043226, GO:0043228, GO:0043229, GO:0043232, GO:…		L	PIRSF003128	PIRSF003128					SSF52540	SSF52540			167546.P9301_19031	May be involved in recombinational repair of damaged DNA (By similarity)			G3DSA:3.40.50.300	G3DSA:3.40.50.300	COG0497	DNA repair ATPase RecN			PF02463	RecF/RecN/SMC N terminal domain							Coil	Coil	MLIQLKIKNIALIEIIEINFEKGLNIITGDSGSGKSLIVDSLNALFGGTNIPLKHLIRPGNDFCFIEAIFSSSPQINDWLIVNGFEITSSELQIKRKSYKKNNKILSKYSVNNLSINRQLLEKLGRFLIDFAGQSDTFIFDSLDKRRLIIDDLCSQESRDTSERIKSIWGETKVLEGLMHEKIEFSRNQTEKNLAIKHMLKSLEEADLNSSEEILELELLENKLVNNLEINNSIKSSLENLNNFSHDEPSVTSFINQSLKILNKTADFDQKIQKFREKLLNIHADVEDLIFDLKSYLQEIENNESNLPEIQKRLFFLKNLERTFSLDLTQLIEKRDQLKTYFQQNDQGNEISMIKAQIENLQSNLNSLFVIQSTERKKIAKQLQISVMSILSNLGLENA…
	3948	GC_00000763	Bin_1	JFNG01	141	DETECTED				H					PS50011	Protein kinase domain profile.	SSF56112	SSF56112			146891.A9601_19231	Required, probably indirectly, for the hydroxylation of 2-octaprenylphenol to 2-octaprenyl-6-hydroxy-phenol, the fourth step in ubiquinone biosynthesis (By similarity)			G3DSA:1.10.510.10	G3DSA:1.10.510.10	COG0661	Predicted unusual protein kinase regulating ubiquinone biosynthesis, AarF/ABC1/UbiB family		map00130, map01100, map01110	PF03109	ABC1 family									MKEDFTDFIEVSGLLNYDPDTISKIYKKNPKRLLKRLWQTLLPIFAYIFSVGWDKLTGRLKNEEQARFRARELTNLLVELGPAFVKAGQALSTRPDIIPAILLEELSELQDQLPGFDGDKAMELIEEDLGKKIDEIFLEIDKEPISAASLGQVHKAKLKNQEIVAIKVQRPGLREQITLDLYIVRNIAYWLKNNIGLIRSDLVALIDELGKRVFEEMDYLNEAANAEKFRDMHKHNKMIAVPKIYKEITSRRVLAMEWIDGTKLTNLEDVKKLGINPDEMIDIGVQCSLEQLLEHGFFHADPHPGNLLALEDGRLCYLDFGMMSEVSRESRSGLIQAVVHLVNKNFDKLSQDFVKLGFLSEEVNLEPIVPAFQDVFINAVEQGVSKMDFKSVTDDMSGV…
	5406	GC_00001198	Bin_1	JFNG01	142	DETECTED				S											146891.A9601_19241	Alpha/beta hydrolase of unknown function (DUF1400)									PF07176	Alpha/beta hydrolase of unknown function (DUF1400)									MKFNKFLKFKIFFILVIPPLFFNVPKAYTAEEIKITYSIFSRTIKVNSLKTFAKEGKSTRQLKRILKATGSTDKDIRKVLNKDFEVPITIASKLVYSEIGNVFLTRLSSIIHPPRATDERTGMLALRASVIQGIYKGNGKINLVNFFEGYPTKTVILDVSALSKVMNKVESISELLTFFTNSPLEKIKTN
	4526	GC_00000281	Bin_1	JFNG01	143	DETECTED		GO:0003674, GO:0003824, GO:0004795, GO:0005488, GO:0005575, GO:0005622, GO:0005623, GO:0005737, GO:0005829, GO:0005886, GO:0006082, GO:0006520, GO:0006566, GO:0006807, GO:0008150, GO:0008152, GO:0008652, GO:0009058, GO:0009066, GO:0009067, GO:0009088, GO:0009987, GO:0016020, GO:0016053, GO:0016829, GO:0016835, GO:0016838, GO:0019752, GO:0030170, GO:0040007, GO:0043167, GO:0043168, GO:0043436, GO:…		E	PIRSF038945	PIRSF038945					SSF53686	SSF53686			146891.A9601_19251	Catalyzes the gamma-elimination of phosphate from L- phosphohomoserine and the beta-addition of water to produce L- threonine (By similarity)			G3DSA:3.40.50.1100	G3DSA:3.40.50.1100	COG0498	Threonine synthase		map00260, map00750, map01100, map01120, map01230	PF00291	Pyridoxal-phosphate dependent enzyme			TIGR00260	thrC: threonine synthase	PS00165	Serine/threonine dehydratases pyridoxal-phosphate attachment site.			MVLFNKIKNKLRINYRKKRWPGLIEAYKQYLPVTKKTPIISLNEGNTPLILSKSISNLIGNGTKVFLKYDGLNPTGSFKDRGMTMAISKAKEEGREAVICASTGNTSAAAAAYASRGGLKPYVLIPEGFVAQGKLAQALMYGAEIISINGNFDKALEIVRDLSSEHPIELVNSVNPYRIQGQKTAAFEIVDDLGYAPDWLCIPMGNAGNITAYWMGFKEYSTIKRNLKLPIMMGFQSEGSAPLVKNIIVKDPETIATAIRIGNPVNREKAKKVRKESKGDFQSVTDEEIINAYKILAKEGVFCEPASAASVAGLIKNKNRIQKESTIVCVLTGNGLKDPDCAIKNNDAIFRKNIEPSLKNITKILGY
	6824	GC_00000836	Bin_1	JFNG01	144	DETECTED		GO:0003674, GO:0003824, GO:0003887, GO:0005575, GO:0005576, GO:0005618, GO:0005622, GO:0005623, GO:0005737, GO:0005829, GO:0006139, GO:0006259, GO:0006260, GO:0006261, GO:0006271, GO:0006725, GO:0006807, GO:0006950, GO:0006974, GO:0008150, GO:0008152, GO:0009058, GO:0009059, GO:0009360, GO:0009987, GO:0016740, GO:0016772, GO:0016779, GO:0022616, GO:0030312, GO:0032991, GO:0033554, GO:0034061, GO:…		L	PIRSF000804	PIRSF000804					SSF55979	SSF55979			146891.A9601_00001	DNA polymerase III is a complex, multichain enzyme responsible for most of the replicative synthesis in bacteria. This DNA polymerase also exhibits 3' to 5' exonuclease activity. The beta chain is required for initiation of replication once it is clamped onto DNA, it slides freely (bidirectional and ATP- independent) along duplex DNA (By similarity)			G3DSA:3.10.150.10	G3DSA:3.10.150.10	COG0592	DNA polymerase III sliding clamp (beta) subunit, PCNA homolog		map00230, map00240, map01100, map03030, map03430, map03440	PF00712	DNA polymerase III beta subunit, N-terminal domain	SM00480	DNA polymerase III beta subunit	TIGR00663	dnan: DNA polymerase III, beta subunit					MEIICNQNELNNAIQLVSKAVASRPTHPILANILLTADEGTNKISVTGFDLNLGIQTSFDGTVKNSGAITIPSKLLSEIVNKLPNETPVSLEVDENSDNILIKSDRGSFNLKGIPSDEYPNLPFVESGTSLNIDPSSFLKALKSTIFASSNDDSKQLLTGVNFTFKPNYLESASTDGHRLAVALIGNEEHIKNKENLSSNVDDLSVTIPTRSLREIEKLVSLRTSENSIKLFYDKGQVVFISSNQIITTRTLEGTYPNYSQLIPDSFSKILNFNTKKLIDSLERIAVLADQQSSVVKIKLDDTDLASISADAQDIGNANESIPVSYSGENFDIAFNVRYLLEGLKVIASENVLLKCNIATTPAVFVPEDNLNSFTYLVMPVQVRS
	6097	GC_00000707	Bin_1	JFNG01	145	DETECTED				S							SSF50346	SSF50346							G3DSA:2.30.30.240	G3DSA:2.30.30.240					PF05239	PRC-barrel domain									#NAME?
	1308	GC_00000864	Bin_1	JFNG01	146	DETECTED		GO:0005575, GO:0005622, GO:0005623, GO:0005737, GO:0006139, GO:0006163, GO:0006164, GO:0006725, GO:0006753, GO:0006793, GO:0006796, GO:0006807, GO:0008150, GO:0008152, GO:0009058, GO:0009117, GO:0009165, GO:0009987, GO:0018130, GO:0019438, GO:0019637, GO:0034641, GO:0034654, GO:0040007, GO:0044237, GO:0044238, GO:0044249, GO:0044271, GO:0044281, GO:0044424, GO:0044464, GO:0044710, GO:0046483, GO:…		F	PIRSF001587	PIRSF001587					SSF56042	SSF56042			93060.P9215_00021	phosphoribosylformylglycinamidine synthase ii	MF_00420	Phosphoribosylformylglycinamidine synthase subunit PurL [purL].	G3DSA:3.30.1330.10	G3DSA:3.30.1330.10	COG0046	Phosphoribosylformylglycinamidine (FGAM) synthase, synthetase domain		map00230, map01100, map01110	PF02769	AIR synthase related protein, C-terminal domain			TIGR01736	FGAM_synth_II: phosphoribosylformylglycinamidine synthase II			Coil	Coil	MVNQENNDLYDLNEALQVENLTLNDYEEICKRLKRKPNRTELGMFGVMWSEHCCYRNSKPLLSKFPTKGKNVLVGPGENAGVIDVGNNQKLVFKIESHNHPSAIEPFQGAATGVGGILRDIFTMGARPIAVLNSLRFGNLDKSSNVDLLRGVVSGISHYGNCVGVPTVGGEIDFDDSYSGNPLVNVMALGLLETEEIVCSGAKNVGSPVLYVGNTTGRDGVGGASFASSELTTTSLDDRPAVQVGDPFVEKSLIEACLDAFKTGDVIAAQDMGAAGLTCSSAEMAANGNLGISIDLDLVPSREDDMSSYQYLLSESQERMLFVVKQEKINDLIEKFNKWGLYASVIGEVIGTNEVIISHKGKIVAQIPTSALSDDTPVNFHNVINNPPNDLLNKWEWKE…
	406	GC_00000795	Bin_1	JFNG01	147	DETECTED		GO:0003674, GO:0003824, GO:0004044, GO:0005575, GO:0005622, GO:0005623, GO:0005737, GO:0005829, GO:0006082, GO:0006139, GO:0006163, GO:0006164, GO:0006520, GO:0006541, GO:0006725, GO:0006753, GO:0006793, GO:0006796, GO:0006807, GO:0008150, GO:0008152, GO:0009058, GO:0009064, GO:0009117, GO:0009150, GO:0009152, GO:0009165, GO:0009259, GO:0009260, GO:0009987, GO:0016740, GO:0016757, GO:0016763, GO:…		F	PIRSF000485	PIRSF000485			PS51278	Glutamine amidotransferase type 2 domain profile.	SSF53271	SSF53271			146891.A9601_00031	glutamine phosphoribosylpyrophosphate amidotransferase	MF_01931	Amidophosphoribosyltransferase [purF].	G3DSA:3.60.20.10	G3DSA:3.60.20.10	COG0034	Glutamine phosphoribosylpyrophosphate amidotransferase		map00230, map00250, map01100, map01110	PF13522	Glutamine amidotransferase domain			TIGR01134	purF: amidophosphoribosyltransferase					MCGIVGIVSSNDVNQQIYDSLLLLQHRGQDSTGIATMENTVFHIHKVKGQVNTAYRTRDMRNLIGKIGLGHVRYATKGSAESVEEAQPFYVNAPYGIVLIHNGNLTNTRDLEKQLFNVDKRHTNSSSDTEMLLNVFATELQEQINNQELEPDIIFNAVKSLHKRIQGSYASIALISGHGLLAFRDPFGIRPLVIGKRLSLTTKKEEWMVASESLVLENNDYEVVRDVDPGEAVFINLDGQFFSKQCSENPMLFPCAFEYVYLARPDSIMNGISVYKARLKMGDYLAETIKQTINSGDIDVVMPIPDSSRPAAMQVARQLGIEYREGFFKNRYVGRTFIMPGQQKRKKSVRQKLNAMSAEFKNKNVLIVDDSIVRGTTSKEIVQMAKDAGANKVFFTSAA…
	8017	GC_00000989	Bin_1	JFNG01	148	DETECTED		GO:0003674, GO:0003824, GO:0003916, GO:0003918, GO:0005575, GO:0005623, GO:0005886, GO:0006139, GO:0006152, GO:0006163, GO:0006195, GO:0006200, GO:0006259, GO:0006260, GO:0006261, GO:0006265, GO:0006725, GO:0006753, GO:0006793, GO:0006796, GO:0006807, GO:0007059, GO:0008094, GO:0008150, GO:0008152, GO:0009056, GO:0009058, GO:0009059, GO:0009116, GO:0009117, GO:0009119, GO:0009123, GO:0009125, GO:…		L							SSF56719	SSF56719			146891.A9601_00041	subunit A			G3DSA:3.90.199.10	G3DSA:3.90.199.10	COG0188	DNA gyrase/topoisomerase IV, subunit A			PF00521	DNA gyrase/topoisomerase IV, subunit A	SM00434	DNA Topoisomerase IV					Coil	Coil	MDKKNFTSISLQEEMQRSYLEYAMSVIVGRALPDARDGLKPVQRRIIFAMHELGLTPDKPFRKCARVVGDVLGKYHPHGDQAVYDALVKLVQNFSTKYPTLDGHGNFGSVDNDPPAAMRYTETRLAPIAHKGFLEEIASETVSFSNNFDGSQKEPDVLPAQLPFLLLNGSTGIAVGMATNIPPHNLGEIVDGLVALVKNKDISDKKLSNIIKGPDFPTGGELIYSHAIEELYQTGKESITIRGVVNTEEINLGKGKHKKNAIIISELPYQINKAGWIEKLAELVNSGKITGISDIRDESDRDGMRIVIELKKDSNSELVISNLYKRTTLQTNFGAIFLALIKGKPVQLNLKKYLNYFLEFREETIRKRTFYFLKNTLDKLEISEGLSKATKNIKKVIEI…
	7728	GC_00001122	Bin_1	JFNG01	149	DETECTED		GO:0005575, GO:0005623, GO:0030288, GO:0030312, GO:0030313, GO:0031975, GO:0042597, GO:0044462, GO:0044464, GO:0071944		S					PS50005	TPR repeat profile.	SSF48452	SSF48452			146891.A9601_00051	repeat protein			G3DSA:1.25.40.10	G3DSA:1.25.40.10	COG0457	Tetratricopeptide (TPR) repeat			PF13414	TPR repeat	SM00028	Tetratricopeptide repeats					Coil	Coil	MKSFLKKTIWISMICFYFFQIEIVRAIVPYYYFPTIKNLQKQSLYIGKNAYQLLYFGQYEDSLNLAKLAVKINAKDEKLWLILAEAQIANKEYKNALSSLNKAEQINSNISEIYFAKSNIYLKISQQTKAKNALEKGIKIEPNNHKAIFQLGNILLMEKNYLGAIKLFDKSIKIKPDFWQAINNQGLAYFEKNRVNLAIKLFESAISIEENAEPLLGLASCINIKDNELAIQLAKKALDKDPKYVNYDYRKEQLWGEKLQASTEILLQNEQLKKDVILAKSKISKST
	2323	GC_00001165	Bin_1	JFNG01	150	DETECTED		GO:0003674, GO:0005575, GO:0005622, GO:0005623, GO:0005737, GO:0006139, GO:0006396, GO:0006399, GO:0006400, GO:0006725, GO:0006807, GO:0008033, GO:0008150, GO:0008152, GO:0008616, GO:0009055, GO:0009058, GO:0009116, GO:0009119, GO:0009163, GO:0009451, GO:0009987, GO:0010467, GO:0016070, GO:0018130, GO:0019438, GO:0034470, GO:0034641, GO:0034654, GO:0034660, GO:0042455, GO:0043170, GO:0043412, GO:…		C					PS51379	4Fe-4S ferredoxin-type iron-sulfur binding domain profile.	SSF46548	SSF46548			146891.A9601_00061	Catalyzes the conversion of epoxyqueuosine (oQ) to queuosine (Q), which is a hypermodified base found in the wobble positions of tRNA(Asp), tRNA(Asn), tRNA(His) and tRNA(Tyr) (By similarity)			G3DSA:3.30.70.20	G3DSA:3.30.70.20	COG1600	Epoxyqueuosine reductase QueG (queuosine biosynthesis)			PF13484	4Fe-4S double cluster binding domain			TIGR00276	TIGR00276: epoxyqueuosine reductase	PS00198	4Fe-4S ferredoxin-type iron-sulfur binding region signature.			MIDTIQEKKEISRKLKERAIFEGFSVAGIASIPGSSRVKLRTNALERWLANNYHAEMKWMEAEKRKNIGTLFEDAKSILSVGFTYINSQNSNNN-FLKVAKFSQGEDYHKVIHKRLKNIGKWINIEIPDCKWKICVDTSPLLEKAWAEEAGIGWIGKNSNLISKKNGSWFTLGFMILTKELIPDTPHQSLCGKCDICIKHCPTKAIVEPFVIQSDLCIAYHTIESRDKTIPKKIEKNLGGWVAGCDICQDVCPWNKSVPYNNNHETTPKEWIKNLNIDSLNWDDKKWQKNLKGTTLKRIKPWMWKRNIQANINNKKIKI
	2118	GC_00000713	Bin_1	JFNG01	151	DETECTED				S																	COG2928	Uncharacterized membrane protein			PF04367	Protein of unknown function (DUF502)									MVESNQNQDSNLGSRLQQDLKNDLIAGLLVVIPLATTIWLSSLVSKFVLTLVTSVPKQLNPFINLNPLLQDLINLTLGLTVPLLAILLIGLMARNFVGRWLLEFGEGTLSKIPVAGAVYKTLKQLLETFLSNKSNRFRRVVLVEYPREGLYSVGFVTGDVGPSLQPELEEKLLSVFIPTAPNPTTGWYTLVPESAVKDLNISVEDAFRTIISAGIVNPDEKNNTTNPTFSKLFSQLRASTNTSS
	9427	GC_00000503	Bin_1	JFNG01	152	DETECTED				K							SSF48013	SSF48013			93060.P9215_00081	Involved in the transcription termination process (By similarity)			G3DSA:1.10.940.10	G3DSA:1.10.940.10	COG0781	Transcription termination factor NusB			PF01029	NusB family			TIGR01951	nusB: transcription antitermination factor NusB			Coil	Coil	MHNRSLSRELSLISLGLIKDKGDFKLNKCQIEEIFESALDSLINHCREELDNCETELENASQKILDSELQEGVDSSYSNVRDELKKSLTKIETVMNTLSVTLDFPKLIVSSGQIDIREDVNQRICNIINNLKSIDSDIDQVMDGWRLKRLPRIDRDILRLAYVDINFLNTPIAVACDEAVNLANKYSDLQGRKFINGVLRRLQTI---
	5749	GC_00000073	Bin_1	JFNG01	153	DETECTED		GO:0000166, GO:0001882, GO:0001883, GO:0003674, GO:0003824, GO:0003924, GO:0005488, GO:0005525, GO:0005575, GO:0005618, GO:0005622, GO:0005623, GO:0005737, GO:0005829, GO:0005886, GO:0006139, GO:0006152, GO:0006163, GO:0006184, GO:0006195, GO:0006605, GO:0006612, GO:0006613, GO:0006614, GO:0006725, GO:0006753, GO:0006793, GO:0006796, GO:0006807, GO:0006810, GO:0006886, GO:0008104, GO:0008150, GO:…		U							SSF52540	SSF52540			146891.A9601_00091	Involved in targeting and insertion of nascent membrane proteins into the cytoplasmic membrane. Acts as a receptor for the complex formed by the signal recognition particle (SRP) and the ribosome-nascent chain (RNC)	MF_00920	Signal recognition particle receptor FtsY [ftsY].	G3DSA:3.40.50.300	G3DSA:3.40.50.300	COG0552	Signal recognition particle GTPase		map03060, map03070	PF00448	SRP54-type protein, GTPase domain	SM00962	SRP54-type protein, GTPase domain	TIGR00064	ftsY: signal recognition particle-docking protein FtsY	PS00300	SRP54-type proteins GTP-binding domain signature.	Coil	Coil	MTNTDSDNSREWAAQAYALLKKRQEEQKQELEKQEEQKQELEKQEEQKQELEKQEEQKQELSDISNKENIAGQSKTTAEPELGEFDDNFTWSAMVLAAQGKKINQISIDEIDWLTKLRRGLEETRKGFVTELLDKLGDDPLTPESLDDLETLLIRADVGIDSTDKVISSLRTKLNEEVVGGEAGIKFLKKELKLIIDKPIKNSGFDLLVPQKGKLNVWLLVGVNGVGKTTTLGKLAYLSSRSNYKTLIAAADTFRAAAVEQLKVWGDRSNVEVISNQSKNADPAAVVFDAINSAKKRNVDLLLVDTAGRLQTKNNLMDELAKIKKIIDKKAPDAIVESLLVLDASQGQNGLKQAKSFAKSADLSGAIITKLDGTSRGGVSLAVSEEVNLPIRFIGAGEG…
	3533	GC_00001191	Bin_1	JFNG01	154	DETECTED				T							SSF81606	SSF81606			146891.A9601_00101	phosphatase					COG2208	Serine phosphatase RsbU, regulator of sigma subunit			PF07228	Stage II sporulation protein E (SpoIIE)	SM00331	Sigma factor PP2C-like phosphatases					Coil	Coil	MTNNQREKIFSNKFIQNFLENEPTV-IQNKYKFAEIASSLAYYLKSFSNINKLLDYVCLIFKHIFSNNIILIIPLNYEGEIWNENIRISVNYEYLTVEEEINCFLNQFHFSKNFKIKEILTFEDALKNKFKEYKIESKKIISRGKCRGFIYIFSADISRHSITEDSNFNFIENCLAVGLENHYLIKTKKKHENVDREISTGAEIQSQLLPDYCPIIHGIDMAAHCRPALQLGGDYYDFMCLKTNISEKRKEKSRWAFVIGDVMGKGIPAGLLMTMLRGMLRAEVLTGLPPDRILHDLNQLAINDLDQSHRFVTLFYSDYDPRTRKLRFANAAHNPPLLWKSSDQKIIKLDSKGFVLGLQKDAEYHCGEIKLNQNDLVLYYTDGVIDTSNSLGQRFDEER…
	7909	GC_00000530	Bin_1	JFNG01	155	DETECTED		GO:0003674, GO:0003824, GO:0004056, GO:0005575, GO:0005622, GO:0005623, GO:0005737, GO:0006082, GO:0006520, GO:0006525, GO:0006526, GO:0006807, GO:0008150, GO:0008152, GO:0008652, GO:0009058, GO:0009064, GO:0009084, GO:0009987, GO:0016053, GO:0016829, GO:0016840, GO:0016842, GO:0019752, GO:0043436, GO:0044237, GO:0044238, GO:0044249, GO:0044281, GO:0044283, GO:0044424, GO:0044464, GO:0044710, GO:…		E			PR00145	Argininosuccinate lyase family signature			SSF48557	SSF48557			146891.A9601_00111	arginosuccinase	MF_00006	Argininosuccinate lyase [argH].	G3DSA:1.20.200.10	G3DSA:1.20.200.10	COG0165	Argininosuccinate lyase		map00250, map00330, map01100, map01110, map01210, map01230	PF00206	Lyase			TIGR00838	argH: argininosuccinate lyase	PS00163	Fumarate lyases signature.			MAKVWSKRFDNALDPFIEKFNASIGFDRKLILEDLDCSIAHAKMLSKTKVISSSEAYQIINGLELIKVEYLEGKFFPSPPSEDIHYCIEEKLISLIGETGKKLHTGRSRNDQVGTDIRLWLRKEIDNIEILITELQKSFLNLAKSNIYTLIPGYTHMQRAQPLSLAHHLLAYIEMLQRDRERYKEVRTRVNISPLGAAALAGTKIKIDRHFTAAELGFKKIYKNSIDAVSDRDFCIEFVSASAILMSHLSKISEEIILWVTDEFSFAKLTDKCATGSSLMPQKKNPDVPELIRGKTGRVYGHLQALLTMVKGVPLSYNKDFQEDKEPIFDTAETISSCIKAMTILINEGIEFNIENLSDSVENDFSNATDLADYLVDKDVPFRTAYQVVGQMVKYCLER…
	5937	GC_00001124	Bin_1	JFNG01	156	DETECTED		GO:0003674, GO:0003676, GO:0003723, GO:0005488, GO:0006139, GO:0006725, GO:0006807, GO:0008150, GO:0008152, GO:0009987, GO:0016070, GO:0034641, GO:0043170, GO:0044237, GO:0044238, GO:0044260, GO:0046483, GO:0071704, GO:0090304, GO:0097159, GO:1901360, GO:1901363		S					PS50102	Eukaryotic RNA Recognition Motif (RRM) profile.	SSF54928	SSF54928			167546.P9301_00121	Rna-binding protein			G3DSA:3.30.70.330	G3DSA:3.30.70.330	COG0724	RNA recognition motif (RRM) domain			PF00076	RNA recognition motif. (a.k.a. RRM, RBD, or RNP domain)	SM00360	RNA recognition motif							MSIFVGNLPFRAEREDVIQLFAPFGEVLNCSLPLERDTGRKRGFAFIEMADEAIESKAIDGLQGTELMGRPLRINKAEPRGSGGSRRGGRGGHGGGNNGGYGGGGYG-GGNNGGYGG-GGYGGGNNGGYGGGGYGGGNNGGYGGGGYGGGNNGSNISNANKSSGAEGWEDRSYGNASDNSEYENGRSRRKRGVSNESNTSNETN
	733	GC_00000185	Bin_1	JFNG01	157	DETECTED		GO:0002943, GO:0003674, GO:0003824, GO:0006139, GO:0006396, GO:0006399, GO:0006400, GO:0006725, GO:0006807, GO:0008033, GO:0008150, GO:0008152, GO:0009451, GO:0009987, GO:0010467, GO:0016070, GO:0016491, GO:0016627, GO:0017150, GO:0034470, GO:0034641, GO:0034660, GO:0043170, GO:0043412, GO:0044237, GO:0044238, GO:0044260, GO:0044710, GO:0046483, GO:0055114, GO:0071704, GO:0090304, GO:1901360		J	PIRSF006621	PIRSF006621					SSF51395	SSF51395			167546.P9301_00131	Catalyzes the synthesis of dihydrouridine, a modified base found in the D-loop of most tRNAs (By similarity)	MF_02041	tRNA-dihydrouridine(20/20a) synthase [dusA].	G3DSA:3.20.20.70	G3DSA:3.20.20.70	COG0042	tRNA-dihydrouridine synthase			PF01207	Dihydrouridine synthase (Dus)					PS01136	Uncharacterized protein family UPF0034 signature.			MKIIQSNSIKNIHKLSIAPMMDCTDRHFRMIMRKISSEALLYTEMIVAQSLVYTNKKEIFLDFNDEEHPISIQFGGDDPKTLKEAAKMAQDWGYDEINFNVGCPSPRVCSGNFGASLMKEPEKVAKCIESLKNNCNLPVTIKHRIGVDNDDSFVNLNNFVRIIANAGADRFAVHARKAILKGLNPKQNRTIPPLNYDLVKKLKKSNPELLIEINGGLTNIDESLEALNDFDGVMIGRSIYKHPLRWSEIDQRIYGINKKTKSASNVIFSLIPYIEAHLSNGGKSWDICKHLINLVEGIPKAKIWRNQVSNKSLKKELNIEYLFKLTTVLEEMGY
	2925	GC_00000731	Bin_1	JFNG01	158	DETECTED				O							SSF51316	SSF51316			146891.A9601_00141	reductase			G3DSA:2.170.150.20	G3DSA:2.170.150.20	COG0229	Peptide methionine sulfoxide reductase MsrB			PF01641	SelR domain			TIGR00357	TIGR00357: methionine-R-sulfoxide reductase					MNQFLSRRTFILIPTMSILKIIFKPMKVLASSFASKGEWNFSKEEWKTRLSPESYYILREEGTERAFSSQLNNEKRKGIFYCAGCDLPLFSSDKKFDSGTGWPSFWDSIPGSVETKVDFKLIVPRTEYHCSRCGGHQGHVFNDGPLPTGKRYCNNGLALRFVPD
	5292	GC_00000679	Bin_1	JFNG01	159	DETECTED		GO:0005575, GO:0005622, GO:0005623, GO:0005737, GO:0044424, GO:0044464		O			PR00773	GrpE protein signature			SSF58014	SSF58014			167546.P9301_00151	Participates actively in the response to hyperosmotic and heat shock by preventing the aggregation of stress-denatured proteins, in association with DnaK and GrpE. It is the nucleotide exchange factor for DnaK and may function as a thermosensor. Unfolded proteins bind initially to DnaJ	MF_01151	Protein GrpE [grpE].	G3DSA:3.90.20.20	G3DSA:3.90.20.20	COG0576	Molecular chaperone GrpE (heat shock protein)			PF01025	GrpE					PS01071	grpE protein signature.	Coil	Coil	MIENQSDNIGNKGNDDCNQDNSPEDISSSQNSTTENDELPSQKTEEINTEELKNTISNNDARLEQLEKEHETLKNQYVRISADFDNFRKRQSRDQDDLKIQLVSKTLTAILPIVDNFERARQQLKPENEEAQALHRSYQGLYKQLVEVLKQQGVSPMRVVGQQFDPNLHEAVLREPSEEFEEDFIIEELQRGYHLEGKVLRHALVKVSMGPGKQNSQQEVEKDTVEGDANSELNTSEDV
	7866	GC_00000701	Bin_1	JFNG01	160	DETECTED		GO:0005575, GO:0005618, GO:0005622, GO:0005623, GO:0005737, GO:0008150, GO:0030312, GO:0040007, GO:0044424, GO:0044464, GO:0071944		O			PR00625	DnaJ domain signature	PS50076	dnaJ domain profile.	SSF46565	SSF46565			167546.P9301_00161	ATP binding to DnaK triggers the release of the substrate protein, thus completing the reaction cycle. Several rounds of ATP-dependent interactions between DnaJ, DnaK and GrpE are required for fully efficient folding. Also involved, together with DnaK and GrpE, in the DNA replication of plasmids through activation of initiation proteins (By similarity)	MF_01152	Chaperone protein DnaJ [dnaJ].	G3DSA:1.10.287.110	G3DSA:1.10.287.110	COG0484	DnaJ-class molecular chaperone with C-terminal Zn finger domain			PF01556	DnaJ C terminal domain	SM00271	DnaJ molecular chaperone homology domain	TIGR02349	DnaJ_bact: chaperone protein DnaJ	PS00636	Nt-dnaJ domain signature.			MADFYQILGVSRDADADTLKRAYRKLARQYHPDVNKEPGAEDKFKEIGKAYEALADPETRARYDQFGEAGLGGAAGMPDMGDMGGFADLFETFFNGFGGQNPQGGRTQRRGPQQGDDLRYDLNVDFKDAIFGQQREIKIPHLETCEVCRGTGAKPGTGPKTCSTCGGSGQVRRATRTPFGNFTQVAECPSCNGAGQIIADPCLTCGGNGVKQVRKKLRINIPAGVDTGTKLRVSGEGNVGLKGGPPGDLYVFIKVKNDSKLRRDGVTIYSEISVSYLQAILGDTVKITTVDGDVNLKIPNGTQPNTTLSLENKGVPRLGNPVARGNHEVLVKVKLPTLITDSERELLEGLASQYSDKNINSSSGLFSKLFGKES
	5103	GC_00000410	Bin_1	JFNG01	161	DETECTED				S							SSF64307	SSF64307			146891.A9601_00171	redox protein, regulator of disulfide bond			G3DSA:3.30.110.40	G3DSA:3.30.110.40				map04122	PF01206	Sulfurtransferase TusA									MTSLKHLDLKSVPCPLNVVKIKLALEKLSKNEQLIVELDKGEPEEMVLNNLKEMGCLFKQIKENEKFIKIKILNEN
	5673	GC_00000987	Bin_1	JFNG01	162	DETECTED		GO:0003674, GO:0003824, GO:0003924, GO:0006139, GO:0006152, GO:0006163, GO:0006184, GO:0006195, GO:0006725, GO:0006753, GO:0006793, GO:0006796, GO:0006807, GO:0008150, GO:0008152, GO:0009056, GO:0009116, GO:0009117, GO:0009119, GO:0009141, GO:0009143, GO:0009144, GO:0009146, GO:0009150, GO:0009154, GO:0009164, GO:0009166, GO:0009199, GO:0009203, GO:0009205, GO:0009207, GO:0009259, GO:0009261, GO:…		G					PS50936	EngC GTPase domain profile.	SSF52540	SSF52540			146891.A9601_00181	May play a role in 30S ribosomal subunit biogenesis. Unusual circulary permuted GTPase that catalyzes rapid hydrolysis of GTP with a slow catalytic turnover (By similarity)	MF_01820	Putative ribosome biogenesis GTPase RsgA [rsgA].	G3DSA:3.40.50.300	G3DSA:3.40.50.300	COG1162	Putative ribosome biogenesis GTPase RsgA			PF03193	Protein of unknown function, DUF258			TIGR00157	TIGR00157: ribosome small subunit-dependent GTPase A					MKTNSKYLGLVTKKFNDYFLVDLKNQENSGNSQKFLCKVKKSINFKDQLIYVGDEVGIEKIDFKSKRAVITSLKKRKNLLVRPSVANISNIYVTFSVEEPELNLSQVNRFLISAESMGVEVSLVLTKCDLISDKRRSYLIDKFEKWGYQVITLNLQESDCFKNLLAELKQKECSIFMGPSGVGKTTLLNMIIPGLQNSTAPVSNKIKRGKNTTRNVELFSMSNQSYIVDTPGFNMQPLEVDIKLLPNLYSEIYKQVIEEGIKCKFRNCLHLNDEGCNLNTSFERYSFYKEMIESSKSHYYQNQED
	5742	GC_00000355	Bin_1	JFNG01	163	DETECTED		GO:0005575, GO:0009295		S	PIRSF004555	PIRSF004555					SSF82607	SSF82607			146891.A9601_00191	Binds to DNA and alters its conformation. May be involved in regulation of gene expression, nucleoid organization and DNA protection (By similarity)	MF_00274	Nucleoid-associated protein YbaB [ybaB].	G3DSA:3.30.1310.10	G3DSA:3.30.1310.10	COG0718	Conserved DNA-binding protein YbaB (function unknown)			PF02575	YbaB/EbfC DNA-binding family			TIGR00103	DNA_YbaB_EbfC: DNA-binding protein, YbaB/EbfC family			Coil	Coil	MAGFGLPNFGQLTEAFKKAKQIQQDAQKLQDELENMEIEGKSDDEMIKVWISGNQLPLKVEVQENILNANKEQIEQNILQAIQKAHELSTTTMKERMNDLTGGLNLNLPGFDNSDS
	7769	GC_00000116	Bin_1	JFNG01	164	DETECTED		GO:0000166, GO:0000270, GO:0003674, GO:0003824, GO:0005488, GO:0005575, GO:0005622, GO:0005623, GO:0005737, GO:0006022, GO:0006023, GO:0006024, GO:0006807, GO:0008150, GO:0008152, GO:0008360, GO:0008762, GO:0009058, GO:0009059, GO:0009252, GO:0009273, GO:0009987, GO:0016491, GO:0016614, GO:0016616, GO:0022603, GO:0022604, GO:0030203, GO:0034645, GO:0036094, GO:0042546, GO:0043167, GO:0043168, GO:…		M							SSF56194	SSF56194			146891.A9601_00201	Cell wall formation (By similarity)	MF_00037	UDP-N-acetylenolpyruvoylglucosamine reductase [murB].	G3DSA:3.90.78.10	G3DSA:3.90.78.10	COG0812	UDP-N-acetylenolpyruvoylglucosamine reductase		map00520, map00550, map01100	PF02873	UDP-N-acetylenolpyruvoylglucosamine reductase, C-terminal domain									#NAME?
	7768	GC_00000116	Bin_1	JFNG01	165	DETECTED		GO:0000166, GO:0000270, GO:0003674, GO:0003824, GO:0005488, GO:0005575, GO:0005622, GO:0005623, GO:0005737, GO:0006022, GO:0006023, GO:0006024, GO:0006807, GO:0008150, GO:0008152, GO:0008360, GO:0008762, GO:0009058, GO:0009059, GO:0009252, GO:0009273, GO:0009987, GO:0016491, GO:0016614, GO:0016616, GO:0022603, GO:0022604, GO:0030203, GO:0034645, GO:0036094, GO:0042546, GO:0043167, GO:0043168, GO:…		M					PS51387	PCMH-type FAD-binding domain profile.	SSF56176	SSF56176			93060.P9215_00201	Cell wall formation (By similarity)	MF_00037	UDP-N-acetylenolpyruvoylglucosamine reductase [murB].	G3DSA:3.30.43.10	G3DSA:3.30.43.10	COG0812	UDP-N-acetylenolpyruvoylglucosamine reductase		map00520, map00550, map01100	PF01565	FAD binding domain									MNKKIFSENCNLSSYTTIKVGGVAEYFAEPRSVEELSYLIKWANLNKQRCQIIGAGSNLLINNIFIKGLVVCTKKLKSLEIKPYSGIVEAEAGVMLPTLSNSLAKNGLQGGEWAVGIPGTLGGAIYMNAGTGNLSLAKNLISVKIINNKTLEKIES---------------------------------------------------------------------------------------------------------------------------------------------
	2167	GC_00000850	Bin_1	JFNG01	166	DETECTED		GO:0005575, GO:0005622, GO:0005623, GO:0005737, GO:0044424, GO:0044464		M							SSF53623	SSF53623			146891.A9601_00211	Cell wall formation (By similarity)			G3DSA:3.40.1190.10	G3DSA:3.40.1190.10	COG0773	UDP-N-acetylmuramate-alanine ligase		map00471, map00550, map01100	PF08245	Mur ligase middle domain			TIGR01082	murC: UDP-N-acetylmuramate--L-alanine ligase					--------------------MSALAIGLLKKGCSVSGSDLVKNDETQKLEKSGAVIFTSQIRQNIDFVTSKFNNKLINFVVSSAIKPENEEFLHCREKNLSIKHRSEILAMLMRTYTSLAVAGSHGKTSTSTFLSTILELCTRNSSSITGGIIPIYNSNCHLENTKFLVAEVDESDGTINKYKSDIGIINNIDFDHCDHFSNLSEVISSFKSFAKNSKKLLLNFDCETSRNNFYSNCNWSNTTAKNVAYAIIPTEINSKYTIGNYYENENLISSLNIPIPGLHNLSNITAAIAASRMIGVDFVEIKKNIKYLKLPKKRFEFRGQIHERSLYDDYAHHPNEIKETIKLGRLLIQQNHDNEFQNNRLIVIFQPHRYSRVKQFTEEFAEELSKADVIYVTSI…
	439	GC_00000739	Bin_1	JFNG01	167	DETECTED		GO:0005575, GO:0005622, GO:0005623, GO:0005737, GO:0044424, GO:0044464		G	PIRSF000149	PIRSF000149	PR00078	Glyceraldehyde-3-phosphate dehydrogenase signature			SSF55347	SSF55347			146891.A9601_00221	Glyceraldehyde-3-phosphate dehydrogenase			G3DSA:3.30.360.10	G3DSA:3.30.360.10	COG0057	Glyceraldehyde-3-phosphate dehydrogenase/erythrose-4-phosphate dehydrogenase		map00010, map00710, map01100, map01110, map01120, map01230, map04066, map05010	PF02800	Glyceraldehyde 3-phosphate dehydrogenase, C-terminal domain	SM00846	Glyceraldehyde 3-phosphate dehydrogenase, NAD binding domain	TIGR01534	GAPDH-I: glyceraldehyde-3-phosphate dehydrogenase, type I	PS00071	Glyceraldehyde 3-phosphate dehydrogenase active site.			MTLRVAINGFGRIGRNFMRCWLSRGAYTNIEVVGINVTSDPKTNAHLLKYDSVLGQLDGVDIQYTDDTFVINNKTIKCFSDRNPMNLPWKDWGVDLVIESTGVFNTDVGASKHLEVGAKKVILTAPGKGDGVGTYVVGVNADTYKHKDYDILSNASCTTNCLAPVVKVLDQTFGINKGLMTTIHSYTGDQRILDNSHRDLRRARAAATNIVPTSTGAAKAVALVYPEMKGKLTGIAMRVPTPNVSAVDFVFESSKSVTAEEVNNALKEASLSSMKGIIKYGDEPLVSSDYAGTNESSIVDSDLTMCIGDNLVKVLAWYDNEWGYSQRVVDLAEIVAKNWE
	1155	GC_00000959	Bin_1	JFNG01	168	DETECTED		GO:0003674, GO:0003824, GO:0006725, GO:0006732, GO:0006766, GO:0006767, GO:0006772, GO:0006790, GO:0006793, GO:0006796, GO:0006807, GO:0008150, GO:0008152, GO:0009030, GO:0009058, GO:0009108, GO:0009110, GO:0009228, GO:0009229, GO:0009987, GO:0016301, GO:0016310, GO:0016740, GO:0016772, GO:0016776, GO:0018130, GO:0019438, GO:0019637, GO:0034641, GO:0040007, GO:0042357, GO:0042364, GO:0042723, GO:…		H	PIRSF005303	PIRSF005303					SSF55326	SSF55326			167546.P9301_00231	Catalyzes the ATP-dependent phosphorylation of thiamine- monophosphate (TMP) to form thiamine-pyrophosphate (TPP), the active form of vitamin B1 (By similarity)			G3DSA:3.30.1330.10	G3DSA:3.30.1330.10	COG0611	Thiamine monophosphate kinase		map00730, map01100	PF00586	AIR synthase related protein, N-terminal domain			TIGR01379	thiL: thiamine-phosphate kinase					MHKEILEDIGEKELINRLGKFMPKNQISDDCALIKTKNENLLVNTDSLVENVHFNDIIISPGDLGWKAVVSNISDLLSSGSKKTIGITISLVLPSRTEWIWVEELYRGINKALKEYGGIILGGDCSKGNQKAISITAFGIQGEIELRRNACKSGDVILTTGIHGLSKLGFLIKNKIYFDNDISLNKRLISKSIQHFCRPKVYPNFLKNLIKTRSNKKIKRIGCTDSSDGLFQALQDLASASQCKAIINYEKIPKDKDWPTGNKWDEYYFFGGEDYELVFSLPKKWAKNLTKLDKDINEIGFFTDGEPSIEFKDSNKNKLLDITPFKHF
	411	GC_00001125	Bin_1	JFNG01	169	DETECTED		GO:0005575, GO:0005622, GO:0005623, GO:0009579, GO:0031977, GO:0044424, GO:0044436, GO:0044464		O					PS50072	Cyclophilin-type peptidyl-prolyl cis-trans isomerase domain profile.	SSF50891	SSF50891			167546.P9301_00241	Peptidyl-prolyl cis-trans isomerase			G3DSA:2.40.100.10	G3DSA:2.40.100.10	COG0652	Peptidyl-prolyl cis-trans isomerase (rotamase) - cyclophilin family			PF00160	Cyclophilin type peptidyl-prolyl cis-trans isomerase/CLD									MQKFLSNQNKLFLIISIVIFQVFLLKPIEVLADLPTGNAVKDPSAILRNALPIKQVELQELQHKLEETSDLVRGGRWPALTKTVTKCQSLLKKYQSKIIEELPKDKKKIAEKTFLELKENFDTLLDYSKSKDKYSFIATRRDALEKIGGLEEYFLPKEFPYSIPQEFDNLPRLLGRAKVNIKTSKGDMQAIVDGFNAPLTAGAFVDLSSKNFYKDLPINRAEEFFVLQTGDPIGEDIGYIDPETNKERHVPLEIRIPDEKDTFYNQTFEDLGLYTETPTLPFATLGTLGWSHSNTAVDDGSSQFFFFLYEAELNPAGRNLIDGRNAAFGYVVDGFDVLEELTKDDTIISIDVLEGIENLKLNA
	6289	GC_00000377	Bin_1	JFNG01	170	DETECTED		GO:0003674, GO:0003676, GO:0003723, GO:0003746, GO:0005488, GO:0005575, GO:0005622, GO:0005623, GO:0005737, GO:0006412, GO:0006414, GO:0008135, GO:0008150, GO:0008152, GO:0009058, GO:0009059, GO:0009987, GO:0010467, GO:0019538, GO:0034645, GO:0040007, GO:0043021, GO:0043022, GO:0043170, GO:0044237, GO:0044238, GO:0044249, GO:0044260, GO:0044267, GO:0044424, GO:0044464, GO:0071704, GO:0097159, GO:…		J	PIRSF005901	PIRSF005901					SSF50104	SSF50104			93060.P9215_00251	Involved in peptide bond synthesis. Stimulates efficient translation and peptide-bond synthesis on native or reconstituted 70S ribosomes in vitro. Probably functions indirectly by altering the affinity of the ribosome for aminoacyl-tRNA, thus increasing their reactivity as acceptors for peptidyl transferase (By similarity)	MF_00141	Elongation factor P [efp].	G3DSA:2.30.30.30	G3DSA:2.30.30.30	COG0231	Translation elongation factor P (EF-P)/translation initiation factor 5A (eIF-5A)			PF08207	Elongation factor P (EF-P) KOW-like domain	SM00841	Elongation factor P, C-terminal	TIGR00038	efp: translation elongation factor P	PS01275	Elongation factor P signature.			MQVYDPWGCNTGMISSNDFRTGTTIELDGQVWRVVEFLHVKPGKGSAFVRTKLKSVQSGNVVEKTFRAGESVQQAILEKSNLQHTYVESGDYVFMDMTSFEETRLTSEQIGKGAKYLKEGMEVNVIFHNGKILEVELPISITLKVTETDPGVKGDTASGGTKPAILETGAQVMVPLFISVGEMIKVDTRNDSYLGREN
	1660	GC_00000177	Bin_1	JFNG01	171	DETECTED				I			PR01071	Acetyl-CoA biotin carboxyl carrier protein signature	PS50968	Biotinyl/lipoyl domain profile.	SSF51230	SSF51230			146891.A9601_00261	Acetyl-CoA carboxylase, biotin carboxyl carrier protein			G3DSA:2.40.50.100	G3DSA:2.40.50.100	COG0511	Biotin carboxyl carrier protein		map00061, map00253, map00620, map00640, map00720, map01100, map01110, map01120	PF00364	Biotin-requiring enzyme			TIGR00531	BCCP: acetyl-CoA carboxylase, biotin carboxyl carrier protein	PS00188	Biotin-requiring enzymes attachment site.			MTMKLDHDDLNRLIEKISTSDIQEFSLEGEDFKLEIKRNVIDQNQVVNNLVSNSSFDQQTIANQKTINENISVVNEPEVPQVAPPGRSDLTEITSPMVGTFYRAAAPGEEPFVEVGNNVKVGQTICILEAMKLMNEIESEFNAEIVEILVENGTPVEFGQVLMRVKQS
	5874	GC_00000670	Bin_1	JFNG01	172	DETECTED		GO:0005575, GO:0005622, GO:0005623, GO:0005737, GO:0044424, GO:0044464		H							SSF53659	SSF53659			146891.A9601_00271	Catalyzes the NAD(P)-dependent oxidation of 4- (phosphohydroxy)-L-threonine (HTP) into 2-amino-3-oxo-4- (phosphohydroxy)butyric acid which spontaneously decarboxylates to form 3-amino-2-oxopropyl phosphate (AHAP) (By similarity)	MF_00536	4-hydroxythreonine-4-phosphate dehydrogenase [pdxA].	G3DSA:3.40.718.10	G3DSA:3.40.718.10	COG1995	4-hydroxy-L-threonine phosphate dehydrogenase PdxA		map00750, map01100	PF04166	Pyridoxal phosphate biosynthetic protein PdxA			TIGR00557	pdxA: 4-hydroxythreonine-4-phosphate dehydrogenase PdxA					MNFQNTNKPSKVVLSVGDESGIGPEIILKALYSNEIPENIEYILVGSKKNLQNTYENLRSLGLENLANPKNLKIQDIEICPSNNDPKSSYGDSSFQYLKKAIEIVKQYPNAALVTGPICKKSWSLAGHYFSGQTEVLAKSCSVKNVGMLFTAKSPITGWRFNTLLATTHIALSEVPKKLTKELIHSKLDLFKDFCITYTDKPTLKVAGLNPHAGEEGILGHEEKDWLNDALITWNEKNTDIELLGPLSPDSCWNTSVKAWNDKNSEKHDGILAMYHDQGLIPMKVIALNYSVNTTIGLPFIRTSPDHGTGFDIAGKGVAQSQSMIEAIKSAVEMTNNSRLLNTH
	7086	GC_00001090	Bin_1	JFNG01	173	DETECTED				M							SSF51735	SSF51735			167546.P9301_00281	Nad-dependent epimerase dehydratase			G3DSA:3.40.50.720	G3DSA:3.40.50.720	COG0451	Nucleoside-diphosphate-sugar epimerase			PF13460	NAD(P)H-binding									MKKPASILGNKNKFLILGCGFSGSFFAKTIRKFGCTVLTSSRSASKDPNSFIFNSEHEVTPDKKIFDGVTHILSCIPPDENGNDPVLKSLKNKLESLSLEWVGYLSTTGVYGNTKGDWVSEINEPNPFQKRSYKRLNCEKEWIESGLPVQIFRLPGIYGPGRSTFEAIKNKKIRVISKEKQVFSRIHVADIANAIIYLLQNKDSLKFYQIINIADDEPCSQIEVIQYCYDLLGLTMPKPILFEDAKDELSPIAQSFWMENRRVSNKLLCETLGYKLIYKNYKIGLKNCYLNS--
	4767	GC_00000003	Bin_1	JFNG01	174	DETECTED				V											146891.A9601_00301	Hnh endonuclease									PF01844	HNH endonuclease	SM00507	HNH nucleases							MHINDAVFLEDLCPKFRLRQWRKSIHKFTGKSCIYCGKPSESIDHVIPQSQGGLSTTENCVPACLSCNGDKSDENALYWYRRQKFYDPRRAMAIRAWLEGDLRLAIRLLQWANPNSKVKNKNYIKDKSEYKAA
	6856	GC_00000893	Bin_1	JFNG01	175	DETECTED				S											146891.A9601_00311	Type ii secretion system																	Coil	Coil	MPRLKNKKIMILAYGICTPLILTTSKVNASSFGAEIFCSMRDGGNDHESSWDAAYSYIKKQKGGIFKVSPKNAAAQITETVIREKEKFSYCVEYLDKLHPNRKLIRDLEREAKRKEKEAEDREKKRKELEKQLEETNNEVSEEFTDETLDRYSY
	6871	GC_00000640	Bin_1	JFNG01	176	NOT DETECTED				S											167546.P9301_00321	Putative ammonia monooxygenase									PF05145	Putative ammonia monooxygenase			TIGR03082	Gneg_AbrB_dup: membrane protein AbrB duplication					MPNINLIYYVIAGGIFGALALKTGIPAAPLAGALIGASILSISGKVDIAEWPIGTRTILEIGIGTVIGTSLTKDSMVDLQSLWRPAILITFTLVITGLAIGLWTSRLLNIDVITTILGAAPGGISGMSLVGSEYGVGAAVATLHAVRLITVLLILPLIVKCLNIFGVIKS
	1435	GC_00000652	Bin_1	JFNG01	177	DETECTED				S																															MFDIILEKYFFAWVYFQIRFLFYSRSGPFCWHNIIKECTFMSSQISYKDNKNRIKKKLSFFEGGHQLEKLEFALAIAQTNGDEKKSIVLRKKIVELGGNVEEPGT
	3705	GC_00000288	Bin_1	JFNG01	178	DETECTED				E	PIRSF000524	PIRSF000524					SSF53383	SSF53383			167546.P9301_00341	Aminotransferase			G3DSA:3.40.640.10	G3DSA:3.40.640.10	COG0075	Archaeal aspartate aminotransferase or a related aminotransferase, includes purine catabolism protein PucG		map00250, map00260, map00630, map00680, map01100, map01110, map01120, map04146	PF00266	Aminotransferase class-V					PS00595	Aminotransferases class-V pyridoxal-phosphate attachment site.			MIPGPTPVPEKVLQALSKHPIGHRSKEFQDLVESTTKNLQWLHQTKNDVLTITGSGTAAMEAGIINTLSRGDKVICGENGKFGERWVKVAKEFGLEVIKIDSEWGTPLNPEEFKKVLDEDKQKEIKAVILTHSETSTGVINDLETISSYIRAHNTALSIVDCVTSLGACNVPVDKWKLDIVASGSQKGYMIPPGLSFISMSKKAWEAVEKSNLPKFYLNLKSYRKSLLSNSNPYTPAVNLVFALDEALKMMREEGLDNIFLRHKKHKLAMSNAVKALNLKLFADEKYLSPSITAIKTEGIDAEEFRKTIKNNFDILLAGGQDHLKGKIFRVGHLGYVNDRDIISVVSAISNTLLSLGKISAQQAGEALIIASKYLK--
	6284	GC_00001024	Bin_1	JFNG01	179	DETECTED				H	PIRSF026782	PIRSF026782					SSF111342	SSF111342			167546.P9301_00351	May catalyze the methylation of C-1 in cobalt-precorrin- 5 and the subsequent extrusion of acetic acid from the resulting intermediate to form cobalt-precorrin-6A (By similarity)	MF_00787	Cobalt-precorrin-5B C(1)-methyltransferase [cbiD].	G3DSA:3.30.2110.10	G3DSA:3.30.2110.10	COG1903	Cobalamin biosynthesis protein CbiD		map00860, map01100	PF01888	CbiD			TIGR00312	cbiD: cobalamin biosynthesis protein CbiD			Coil	Coil	MKKGFSLPLWVAGAARAALKKLLGLPFKNYELIKIPNEKKVIKIEIHSVGLLKDDSHALGITFAKSGLDLDITQNLEIWTIASLEKISFNNPVQTIPINIIAGSGVGIKEDTSEICISNFAKEVLYENLLDSIPAGFNLILEIIFPNGAFLAERTSNKSFGIVNGLSIIGTSAETYSSASPDQLEEAKNNLAKLIQKDFKGEVLFVIGENGLNLAKTHNVNLPIIKIGNWIGPLLVDAAIKKVKTVILFGYHGKLIKLAGGIFHTHNHLADARIEILVYLAVQEKLPPEIIVELSQLDNLENALQLLERFNKSLADKLFKNLSNTIEKRSFNYVNRYVKTNMEIASIIFDRKRKIRWAGINGNKYISYFQ--
	5411	GC_00000905	Bin_1	JFNG01	180	DETECTED		GO:0005575, GO:0005618, GO:0005623, GO:0008150, GO:0030312, GO:0040007, GO:0044464, GO:0071944		F			PR00096	Glutamine amidotransferase superfamily signature	PS51273	Glutamine amidotransferase type 1 domain profile.	SSF52402	SSF52402			146891.A9601_00361	Catalyzes the synthesis of GMP from XMP (By similarity)	MF_00344	GMP synthase [glutamine-hydrolyzing] [guaA].	G3DSA:3.40.50.880	G3DSA:3.40.50.880	COG0518, COG0519	GMP synthase - Glutamine amidotransferase domain; GMP synthase, PP-ATPase domain/subunit		map00230, map00983, map01100	PF00117	Glutamine amidotransferase class-I			TIGR00884	guaA_Cterm: GMP synthase (glutamine-hydrolyzing), C-terminal domain					MSQTILKKERDPSILILDFGSQYSELIARRIRETNVFSLVVSNYISIEEIKSINPKGIILSGGPNSVYEQNAPNCNEKIFHLGIPILGICYGMQLMVKELGGSVISATKRAEYGRAPINIDQESDLLSDVEDKSIMWMSHGDSINCLPDGFNKIAHTENTLHAAIANDVKKLFGVQFHPEVIHSEFGMTVIKNFVYKISCCAADWTTETYIEETIPRIREKVGNKKVLLALSGGVDSSTLAFLLNKAIGNQLTCMFIDQGFMRKGEPEFLMDFFDKKFQIKVEYINARERFIAKLKDITDPEQKRKIIGEEFIRVFEEESNRLGPFQYLAQGTLYPDVIESAGTNIDPKTGERIAVKIKSHHNVGGLPKDLQFKLVEPLRKLFKDEVRKVGAALGLPDE…
	3681	GC_00002220	Bin_1	JFNG01	181	NOT DETECTED				L							SSF56349	SSF56349			622637.Met49242DRAFT_3975	Integrase			G3DSA:1.10.443.10	G3DSA:1.10.443.10					PF00589	Phage integrase family									MGSKGINNKSFTLWEELELRVSTDSGKVAIYKKTYNDKRQGRTPLPIEDRSYFVHIPVPNTKGGIRKSLLTKDRTTAITKVNEMVVNVMVDLRSGNSIIPVPVEDVVEKFLKHKKSRTRGRWESKRDRGKKSITSERYTLIEGKLRNYLIGFLGKKTDVRTIPFKRWSKWEEWRIENNVRKEMGKPKSVTIQNEMGLIRECWKWGMVEGYIPTSLKLPFHDEDLISDDKVSRDTWNANEWRSFSRRLRDWLKETESNPDENYVWDAYVSYQMVFFISNCGMRTGEVVKVKRKDIEFVQLNDEYKNLICLVQVHPSTKTGEREVNAMGGKFARRVYEKSPHRKKDDFLFCHLDGSEFTTKQFRTWFYRMTKFTDENKRWGKTFQPYGLRHYYATTRLQNG…
	9464	GC_00002397	Bin_1	JFNG01	182	NOT DETECTED																																			MSRKSKYTGGFRPRKYESRIPFPYVVFDEKKEVYFRIVSGFPSTLAVTPIMKEHFPDDYKGYIASSKCWEEIKHLQKK
	6637	GC_00002167	Bin_1	JFNG01	183	NOT DETECTED																																			MSRTNIQKCMSFGMNEEELYEWFVGYCKEQNISHSSYLKNKIREDRNKSKLVSV
	7970	GC_00001889	Bin_1	JFNG01	184	NOT DETECTED																																			MKNKHRRKRPITWSQFNKKMNQFLQELGLKKQRELEEQHYLQLLTENEDFDLIIKRRLS
	6793	GC_00002173	Bin_1	JFNG01	185	NOT DETECTED																																			MKEEDFVSLSVKNKNGDLSPCHYDLDESNSAKISARCVTQKWLQRKSESMYFNPTYFLTLSFFKGSKSPINQYGDNKHIKKVILDFFYPSGKKPKDRLRLWFFVERHYESRKLHLHILMERPDGISWLMSKNRKITLSKDTLFQIIADDDYNLDDVMSECLTNHLKTHIKKLGLGKKSTNHKKIGDFTTRLRYVNKSFDKIDFDCWEHIDIQNSDL
	7082	GC_00002356	Bin_1	JFNG01	186	NOT DETECTED																																			MTKTLTLDTALDITRKHSYEGSIDDIVTLSLTISRSKKVFDKSIYKIFTEKSNINPKIYSNLKKIGDTMDDLPIDAREEVCRSFPPHYRTIYSLCSLRPDEIQIAVKKKSITKDMSYRESEYLVKQIRFPSKLVTETDKGRWSKKQEHLYSIFRSTDVYLGGERTYSFEEDLRRLCKNYGLTFRKPNQSISIKSIRHQERRERSLYWRQVIEKELPPIWFIEKDDKWKKMFNLKTIDELIDAPLRTFTGFIMRSDCGKRNFYTEYGKSYVAKLNMLMETTDNNATRYSLKIARDKKLGDKRELLIWYNEISKHL
	8411	GC_00001962	Bin_1	JFNG01	187	NOT DETECTED				L											525373.HMPREF0766_12405	DNA primase			G3DSA:3.40.50.300	G3DSA:3.40.50.300															MTSILWDSRFLNEFKQELHHNPSIQFWEEDVNGDVMDFKSTHYKKMLMKFFPALGVKNLQLGTTDKGRPTSTLVFTRGNRVEQIDPQTLKQVCFRLFNLMGEKGTQIRNNFYKEKVFNKDELSLIPDLEGKKVFKDNVLSAYRFFQNGFVEITRNGVSPLKSYDEIPEDYVIWNSSVIPKDYEDTITKEVLEHKLSNIIANGIHPETGDLIYQKNDRVKLYQEFKDKVESFEGENPDTHFKDFVENLSRDEEGDIDKNCLERLEIAIGYLCHRYNTANKRQYVLLVDRFYDGVEKDVANGGNGKSLLINTLGTLMNLTILNGKEIKKNSSSFKLAEVTTATEIVHFDDAHSKFDGDRLNPLVTGNFHIERKYENPFSIPSQDAPKIAITSNFPIEGKGN…
	5640	GC_00002134	Bin_1	JFNG01	188	NOT DETECTED																																			MNWEVTLYISGKIFYENVIAKDYQDAKLTALSRNPTARVVSITAKF
	8291	GC_00002000	Bin_1	JFNG01	189	NOT DETECTED				L					PS51736	Resolvase/invertase-type recombinase catalytic domain profile.	SSF53041	SSF53041			717785.HYPMC_0517	resolvase			G3DSA:3.40.50.1390	G3DSA:3.40.50.1390	COG1961	Site-specific DNA recombinase related to the DNA invertase Pin			PF00239	Resolvase, N terminal domain	SM00857	Resolvase, N terminal domain			PS00398	Site-specific recombinases signature 2.	Coil	Coil	MKVAYSRVSSHKGQETGMETQIDILEKFGVDKMFVETGSGTTTKGRDKLKECLDFVREGDELVITRIDRLARSVLDLQTIVKQLNEKGVTLTATEQPIDTKTASGKCFLDMLSVFSEFETNLRRERQLEGIKNAKEKGVYKGRKQNIDVEQIKKLKEEGYGATQIARELNIHRDSVYRLLKKGGEK
	6967	GC_00001584	Bin_1	JFNG01	190	DETECTED				S																					PF12705	PD-(D/E)XK nuclease superfamily									MPDIIKLSRSTVERYISCPRCCVLDKKYKIKPPSLPFTLNIAVDNLCKNEFDYYRKIQEPHPLFIEYGIDAVPYKHKDLERWRSNFQGIRYKSIEHNYEFGGAVDDIWQKKNGHLIIVDVKATSRNNFDWLETFNKYEYAKAYKRQLEMYQWLFKKNGFQVAKEAYLLYFNGKKNQEFFNNQLNFDVHLIKLDCSTSWVENKIIDTVNLLRSDDFPKPSLNCEYCNYLKKRWQLSIN
	7723	GC_00001306	Bin_1	JFNG01	191	DETECTED				S																															MIKSKNPERKITNHLQQDVVKLSGKTIFINPFLYWRRFDENTNRWLREPGQMSEDQISPNRKRFYPEIEWDDLSHEQKLIKDATVEMFLKTLELISTFHPYLSAGQLLEVERKMAIIKKIPFEKWVTKSFAKKARLLENEKRKFQRERFYSSWREWFSLENTQQAILPLIVTIFISSFIGWSLGISKNSCNPYFEQNIEQLN
	2639	GC_00001237	Bin_1	JFNG01	192	NOT DETECTED																																	Coil	Coil	MSENLNSNNIENDDFHPINEDSDYKDLINRLNEIKSTIASIEKTIFK
	7638	GC_00001385	Bin_1	JFNG01	193	DETECTED		GO:0000270, GO:0003674, GO:0003824, GO:0004180, GO:0004185, GO:0005488, GO:0005575, GO:0005618, GO:0005623, GO:0005886, GO:0005887, GO:0006022, GO:0006023, GO:0006024, GO:0006807, GO:0008144, GO:0008150, GO:0008152, GO:0008233, GO:0008236, GO:0008238, GO:0008360, GO:0008658, GO:0009002, GO:0009058, GO:0009059, GO:0009252, GO:0009273, GO:0009274, GO:0009276, GO:0009636, GO:0009987, GO:0016020, GO:…		M							SSF56601	SSF56601			74546.PMT9312_0041	penicillin-binding protein			G3DSA:3.40.710.10	G3DSA:3.40.710.10	COG0768	Cell division protein FtsI/penicillin-binding protein 2		map00550	PF00905	Penicillin binding protein transpeptidase domain			TIGR03423	pbp2_mrdA: penicillin-binding protein 2					MIKTSPNKKIISLKRQPLVLLIFSSISFLLILFRLIFLQLLNYESFKKMSDENRIRLIASQPIRGRILDKNGYVLADSRVKYSLIIKPQSVNKTNWEKHKSSISNLLNIDTNAIQKKYSDGLKNQKLSVIILDDLNVDQLIKFKENEGNLISFEIATKLIRNYPYKSLAAHVIGYTQPITQLEYKFLSKKGYKLNDLIGRTGIEYVYEDFIRGEWGGEMVEVNSLGKFQRSLGIRPPVQGNDIELTIDLKLQLVAEEVLKDKKAGAIIVMDPRDGAIRAMASKPTFDLNFFSKNFKPEKEYNKLFNSPEKPLFNRALNAYDPGSVWKIVTALAGLESGKFPRETMLETQPCITYGSQCFREHNDLGFGVIGYEDALRVSSNTFFYQIGYGAGVDEIHKV…
	4336	GC_00000677	Bin_1	JFNG01	194	DETECTED				S							SSF52218	SSF52218			93060.P9215_00491	reductase			G3DSA:3.40.50.360	G3DSA:3.40.50.360					PF03358	NADPH-dependent FMN reductase									MTETKDLIIITASCGKNLELSEKFLEKSNELKISSEILDLTTLDIPLFNPRIHSKENIPNEIKELKKKLFQIDRWVICAPEYNGSIPPILSNFIAWLSISGDDFRNLFNGQPIAIATFSGGIGLELLTSLRIQLVHLGSQVLGRQLLSSYSKPIDSKTIEDIIQRLLQMKKLKT
	2257	GC_00000781	Bin_1	JFNG01	195	DETECTED		GO:0000166, GO:0003674, GO:0003824, GO:0005488, GO:0005506, GO:0008150, GO:0008152, GO:0009055, GO:0009987, GO:0010181, GO:0016491, GO:0016651, GO:0016661, GO:0016662, GO:0016966, GO:0032553, GO:0036094, GO:0043167, GO:0043168, GO:0043169, GO:0044237, GO:0044710, GO:0046872, GO:0046914, GO:0048037, GO:0050662, GO:0050664, GO:0055114, GO:0072592, GO:0072593, GO:0097159, GO:1901265, GO:1901363		C					PS50902	Flavodoxin-like domain profile.	SSF52218	SSF52218			146891.A9601_00431	domain protein			G3DSA:3.60.15.10	G3DSA:3.60.15.10	COG0426, COG1853	Flavorubredoxin; NADH-FMN oxidoreductase RutF, flavin reductase (DIM6/NTAB) family			PF01613	Flavin reductase like domain	SM00903	Flavin reductase like domain							MSDINIGVLAENQDLSEFEITENFSCVRFLDQNKERFELEFNLEKGTSFNTFFIRSHEELFIIHPPEKQYFDSFDKVISRFCDQFKLGKINFISGHINPQIIETIKNISTQFQKTTITCSNPGYKLISELWNQRNPSLKNFIEIQLPEINIIKRELNLELENISLELIPIPTARWPGGLIIYERNNEILLSEKIFSAHIASADWSETNRVSTEIDRKHFYDCLMAPMSNQVVSITEKIADYDIKTIAPLHGPAIEYSLKSFLNDYIRWGENLSTNNHKIALIYASAYGNTASIGDALAKGINRTSVEVESINCEFTPNDVLVKSIQNADGYLIGSPTLGGHAPTPIVSALGTLLAEGNRDKPVGIFGSFGWSGEAIDLLETKLKDGGFKFSFDPIRIKF…
	7987	GC_00001378	Bin_1	JFNG01	196	DETECTED		GO:0000166, GO:0003674, GO:0003824, GO:0005488, GO:0005506, GO:0008150, GO:0008152, GO:0009055, GO:0009987, GO:0010181, GO:0016491, GO:0016651, GO:0016661, GO:0016662, GO:0016966, GO:0032553, GO:0036094, GO:0043167, GO:0043168, GO:0043169, GO:0044237, GO:0044710, GO:0046872, GO:0046914, GO:0048037, GO:0050662, GO:0050664, GO:0055114, GO:0072592, GO:0072593, GO:0097159, GO:1901265, GO:1901363		C					PS50902	Flavodoxin-like domain profile.	SSF56281	SSF56281			146891.A9601_00441	domain protein			G3DSA:3.60.15.10	G3DSA:3.60.15.10	COG0426, COG1853	Flavorubredoxin; NADH-FMN oxidoreductase RutF, flavin reductase (DIM6/NTAB) family			PF01613	Flavin reductase like domain	SM00903	Flavin reductase like domain							MIASAQTSNSKLAQTNNKLTVQSQNFADDSCAIRSLDWDRSRFDIEFGLRNGTTYNSFIIKGEKLAIIDTSHAKFEELWFEELLKKVNPQEVDYLITSHTEPDHSGLIGNLLELNQNITVVGSKLALKFIEDQIHIPFKRLEVKSGEFLNLGTNPNSGLEHNIEFISAPNLHWPDTIFSYDHSTNVLYTCDAFGLHYCSDEFFDTDQKEIYDDFRFYYDCLMGPNARSVIQAIKRIDKLPELKTIAVGHGPLLHNQVNFWKGKYLEWSSNKSKGNDFVSVCYISDYGYCDRLSQAISHGISKADAQVQLIDLRSSDPQELTSLISESKAVVIPTWPVDSDNELKESLGTLFAALKPKQFTAVYDSFGGNDEPIDSLANKLRELGQKEAFSPLRVKNIPD…
	4494	GC_00001505	Bin_1	JFNG01	197	DETECTED		GO:0001071, GO:0001121, GO:0001130, GO:0001131, GO:0001141, GO:0001217, GO:0002161, GO:0003674, GO:0003700, GO:0003824, GO:0004812, GO:0004813, GO:0005488, GO:0005575, GO:0005618, GO:0005622, GO:0005623, GO:0005737, GO:0005829, GO:0005886, GO:0006082, GO:0006139, GO:0006351, GO:0006355, GO:0006399, GO:0006412, GO:0006417, GO:0006418, GO:0006419, GO:0006448, GO:0006450, GO:0006520, GO:0006725, GO:…		J			PR00980	Alanyl-tRNA synthetase signature	PS50860	Alanyl-transfer RNA synthetases family profile.	SSF55681	SSF55681			74546.PMT9312_0045	Catalyzes the attachment of alanine to tRNA(Ala) in a two-step reaction alanine is first activated by ATP to form Ala- AMP and then transferred to the acceptor end of tRNA(Ala). Also edits incorrectly charged Ser-tRNA(Ala) and Gly-tRNA(Ala) via its editing domain (By similarity)	MF_00036_B	Alanine--tRNA ligase [alaS].	G3DSA:3.30.930.10	G3DSA:3.30.930.10	COG0013	Alanyl-tRNA synthetase		map00970	PF01411	tRNA synthetases class II (A)	SM00863	Threonyl and Alanyl tRNA synthetase second additional domain	TIGR00344	alaS: alanine--tRNA ligase			Coil	Coil	MTSQLIKKIVTGDEIRSAFLKFYSEKLHKIIPSASLIPDDPTVMLTIAGMLPFKPVFLGLKERPSKRATSSQKCIRTNDIENVGITARHHTFFEMLGNFSFGDYFKREAIQWAWELVTNIYQLSVENIIVSVFHEDEESAKIWRDEIGIHSDRIVKLGEEDNFWSSGKTGPCGPCSELYYDFHPEKGLQNIDLEDGDRFIEFYNLVFMQYNRDPNGKLTDLKFKNIDTGMGLERMAQILQKKQNNYETDLIFPIIQKICDIANIDYSSSDDKNKISLKIIGDHTRAVVHLISDGVAASNLGRGYILRRLIRRMVRHGRLLGITNEFLPHIATVGIKLMQNNYPDLKNNNDLILNEIKIEEKRFRETLERGEKLLDELIFSGQKLISGFKAFELYDTYGF…
	3136	GC_00000859	Bin_1	JFNG01	198	DETECTED		GO:0003674, GO:0003824, GO:0005575, GO:0005623, GO:0006082, GO:0006520, GO:0006525, GO:0006527, GO:0006576, GO:0006595, GO:0006596, GO:0006807, GO:0008150, GO:0008152, GO:0008792, GO:0009056, GO:0009058, GO:0009063, GO:0009064, GO:0009065, GO:0009308, GO:0009309, GO:0009445, GO:0009446, GO:0009987, GO:0016054, GO:0016829, GO:0016830, GO:0016831, GO:0019752, GO:0034641, GO:0042401, GO:0042597, GO:…		E	PIRSF001336	PIRSF001336	PR01180	Arginine decarboxylase signature			SSF51419	SSF51419			146891.A9601_00461	Catalyzes the biosynthesis of agmatine from arginine (By similarity)	MF_01417	Biosynthetic arginine decarboxylase [speA].	G3DSA:3.20.20.10	G3DSA:3.20.20.10	COG1166	Arginine decarboxylase (spermidine biosynthesis)		map00330, map01100	PF02784	Pyridoxal-dependent decarboxylase, pyridoxal binding domain			TIGR01273	speA: arginine decarboxylase	PS00878	Orn/DAP/Arg decarboxylases family 2 pyridoxal-P attachment site.	Coil	Coil	MTNFEPKKLKNIWTIEDSISTYNIDKWGDKYFSINSKGNISVTKDIKSENKIDLFKLVKELKSREINPPLIIRFNDILKDRINALHDSFLKAIKTYNYKNFYQGVFPVKCNQQKNVLEKIIEFGSQWNFGLEVGSKSELLIGLSLLENQNSLLICNGYKDKKYIEIATLARKLGKNPIIVIEQRDEVKRIIQAVQELNATPLIGIRAKLSSKSSGRWGKSIGDNSKFGLSIPEIMSTIRELKEANLINEMKLLHFHIGSQISDIAVIKDALQEASQIYVELCKLGAPMQYIDVGGGLGIDFDGTKTSSNTSTNYSLQNYANDVIATIKDSCELNNIKHPTIISESGRAIISHCSVLIFNVLGTSHVSSKLQIFDKKNQQLIISNLLETFYELKKLKNKK…
	6635	GC_00001305	Bin_1	JFNG01	199	DETECTED		GO:0003674, GO:0003824, GO:0004518, GO:0004550, GO:0005575, GO:0005576, GO:0005622, GO:0005623, GO:0005737, GO:0005886, GO:0006139, GO:0006165, GO:0006464, GO:0006468, GO:0006725, GO:0006753, GO:0006793, GO:0006796, GO:0006807, GO:0008150, GO:0008152, GO:0009058, GO:0009117, GO:0009132, GO:0009165, GO:0009987, GO:0015949, GO:0016020, GO:0016301, GO:0016310, GO:0016740, GO:0016772, GO:0016776, GO:…		F			PR01243	Nucleoside diphosphate kinase signature			SSF54919	SSF54919			146891.A9601_00471	Major role in the synthesis of nucleoside triphosphates other than ATP. The ATP gamma phosphate is transferred to the NDP beta phosphate via a ping-pong mechanism, using a phosphorylated active-site intermediate (By similarity)	MF_00451	Nucleoside diphosphate kinase [ndk].	G3DSA:3.30.70.141	G3DSA:3.30.70.141	COG0105	Nucleoside diphosphate kinase		map00230, map00240, map01100, map01110	PF00334	Nucleoside diphosphate kinase	SM00562	SM00562			PS00469	Nucleoside diphosphate kinases active site.			MTKERTFIAIKPDGVQRGYISEIIGRFEKKGFKLVGLKQLIPSKELAQNHYGVHRERPFFGDLVDFISSGPVVAMVWEGEGVILSARKLIGATKPLEAEPGTIRGDLAIDIGRNIIHGSDGEDTAKFEIDLWFNEEELCEWETSDSKWRSEN
	4195	GC_00000854	Bin_1	JFNG01	200	DETECTED				E							SSF51971	SSF51971			74546.PMT9312_0048	thiamine biosynthesis oxidoreductase			G3DSA:3.50.50.60	G3DSA:3.50.50.60	COG0665	Glycine/D-amino acid oxidase (deaminating)		map00730	PF01266	FAD dependent oxidoreductase			TIGR02352	thiamin_ThiO: glycine oxidase ThiO					MTQETKNSILIIGGGLVGLSIAYEFARNNFKVLVLSKNRNASAGFVAAGMLATHAEGLEDELLKFGQESQSLIPKWIKSIEQDSNIKCGLKKCGIVVPFKNKEDLEKFPTYDYGKYLNQKDLQIEINGMNSIWKHGLLFEQDGQIDNRRRLMHALERACSWHGVEFQEGSEVEDLTLEKNKITGATVLCATGELKKINCEKAIICSGAWSKKIFNKIPVFPVKGQMLSIQGPTNFLKRVIFGPKT-YLVPRDDGLIIVGATVEKDSKFNQGNTPIGIKQLQEGILSLLPEAINWPQMEHWWGFRPCTPDLKPIIGKSKIENLFIATGHYRNGVLFSAITSDLLLKIVQNKNLKETEKSFLEKFSLDRFDN
	7549	GC_00001734	Bin_1	JFNG01	201	DETECTED				J							SSF55931	SSF55931			146891.A9601_00491	Allows the formation of correctly charged Asn-tRNA(Asn) or Gln-tRNA(Gln) through the transamidation of misacylated Asp- tRNA(Asn) or Glu-tRNA(Gln) in organisms which lack either or both of asparaginyl-tRNA or glutaminyl-tRNA synthetases. The reaction takes place in the presence of glutamine and ATP through an activated phospho-Asp-tRNA(Asn) or phospho-Glu-tRNA(Gln) (By similarity)	MF_00121	Aspartyl/glutamyl-tRNA(Asn/Gln) amidotransferase subunit B [gatB].	G3DSA:1.10.10.410	G3DSA:1.10.10.410	COG0064	Asp-tRNAAsn/Glu-tRNAGln amidotransferase B subunit		map00970, map01100	PF02934	GatB/GatE catalytic domain	SM00845	GatB domain	TIGR00133	gatB: aspartyl/glutamyl-tRNA(Asn/Gln) amidotransferase, B subunit	PS01234	Glutamyl-tRNA(Gln) amidotransferase subunit B signature.	Coil	Coil	MKNLESWEAVIGLETHVQLNTKSKIFTSASTAFGDAPNTHIDPVVCGLPGTLPVLNETVLEYAVKTSLALNLNVAEHCKFDRKQYFYPDLPKNYQISQFDEPLAENGWLEVEIIEKDKEPYIKKIGIERLHMEEDAGKLVHAGSDRLAGSKYSLVDYNRAGIALCEIVSKPDIRSGKEASEYASEIRRTVRYLGVSDGNMQEGSLRCDVNISVRKGPNAPFGTKVEIKNMNSFSAIQKACDYEIARQIEVYENGGKIFQETRLWDEAKQLTKSMRLKEGSSDYRYFPDPDLGPIEITKAQQEIWFKELPELPSKKRNKYVSQFGLSAYDARVISDEISMANFFEETVANGAEAKLASNWVTSDIVGYLKSKKLSFSELQLSPKNLAEMINMISKNIISG…
	503	GC_00001663	Bin_1	JFNG01	202	DETECTED		GO:0000166, GO:0001882, GO:0001884, GO:0002135, GO:0003674, GO:0003824, GO:0004140, GO:0005488, GO:0005575, GO:0005622, GO:0005623, GO:0005737, GO:0005829, GO:0006139, GO:0006163, GO:0006164, GO:0006725, GO:0006732, GO:0006753, GO:0006793, GO:0006796, GO:0006807, GO:0008150, GO:0008152, GO:0009058, GO:0009108, GO:0009116, GO:0009117, GO:0009119, GO:0009150, GO:0009152, GO:0009163, GO:0009165, GO:…		H					PS51219	Dephospho-CoA kinase (DPCK) domain profile.	SSF52540	SSF52540			146891.A9601_00501	Catalyzes the phosphorylation of the 3'-hydroxyl group of dephosphocoenzyme A to form coenzyme A (By similarity)	MF_00376	Dephospho-CoA kinase [coaE].	G3DSA:3.40.50.300	G3DSA:3.40.50.300	COG0237	Dephospho-CoA kinase		map00770, map01100	PF01121	Dephospho-CoA kinase			TIGR00152	TIGR00152: dephospho-CoA kinase					MDILQKLKNDQRRIGLTGGIASGKTTITNYIRKHKNIPILDADHFSRELIKPNTYGYKKILDYFGNKIIDNKSNSEREINRKLLRNIIFKHSASKEWIEKLLHPLIKERMIEECSQYRNNPTIILVIPLLFEAKFEDICTEIWLVNCPKELQKNRLITRDKISEQEAYELINFQLSFEEKRKFSDIILDNSDDQNKWINTIKELL
	4520	GC_00001357	Bin_1	JFNG01	203	DETECTED		GO:0005575, GO:0005622, GO:0005623, GO:0005737, GO:0044424, GO:0044464		E							SSF56266	SSF56266	PD004193	ACETYLTRANSFERASE ORNITHINE ARGININE BIOSYNTHESIS ARGJ GLUTAMATE N-ACETYLTRANSFERASE TRANSFERASE ACYLTRANSFERASE BIFUNCTIONAL	146891.A9601_00511	Catalyzes two activities which are involved in the cyclic version of arginine biosynthesis the synthesis of N- acetylglutamate from glutamate and acetyl-CoA as the acetyl donor, and of ornithine by transacetylation between N(2)-acetylornithine and glutamate (By similarity)	MF_01106	Arginine biosynthesis bifunctional protein ArgJ [argJ].	G3DSA:3.60.70.12	G3DSA:3.60.70.12	COG1364	N-acetylglutamate synthase (N-acetylornithine aminotransferase)		map00330, map01100, map01110, map01210, map01230	PF01960	ArgJ family			TIGR00120	ArgJ: glutamate N-acetyltransferase/amino-acid acetyltransferase					MSQLDSNWSFVDDSKVTPKGFLFAGISAGLKASNKKDLALILAPEGSIFSGMFTQSIVRACCVDICEERIKTTSGFVRAILINSGQANACTGNLGIQHFKIATGKIAELLSIKEEEVLMCSTGVIGVPIQINDLVKNLPNLVSDLKGNNFENAAEAILTTDLTLKKVSIETIIQGRKIKIAGFAKGSGMIYPNMATMLAFLTCDAGIQKEEWDKMIAIAVQKSFNAISVDGETSTNDSFVGINAGEKIEKRFFPIIQQGIDIVCQNLAKNIARDGEGANCLLEVLVQGAKNTDDAIMLAKSICNSALVKTAIHGCDPNWGRIISAAGNSGVKFNLNDVDLYIGNAHILEKGQLNKYDPQKVTGYIKSRMKGRYLVDDIVKIMINLNSGESKGTAWGCDL…
	7997	GC_00001735	Bin_1	JFNG01	204	DETECTED				D							SSF52540	SSF52540			146891.A9601_00611	Chromosome partitioning			G3DSA:3.40.50.300	G3DSA:3.40.50.300	COG1192	Cellulose biosynthesis protein BcsQ			PF01656	CobQ/CobB/MinD/ParA nucleotide binding domain									MFITVCGQKGGVAKTCTSIHLASVWHSEGKKVCIVDADKNRSALAYASRGNLPFPVFPVNSAAKASRSSEIVITDGQASSDQEELKHLAYGSDLVILPTTAKARSVELTVELANLLSNLKVNHAVVIVKVDFRQQKAAQQAKAALENFGLYVFDTFIPLLSAFDKAEASGNAVFEAVDDLGRSDPRRMTGWSAYCSIASQIPCLISKPSSDTNNLNNQQPISA
	6121	GC_00001737	Bin_1	JFNG01	205	DETECTED				C							SSF51430	SSF51430			146891.A9601_00621	Aldo Keto reductase			G3DSA:3.20.20.100	G3DSA:3.20.20.100	COG0667	Predicted oxidoreductase (related to aryl-alcohol dehydrogenase)			PF00248	Aldo/keto reductase family									MKKRIGLGTWSWGNKLFWNYQSTNDDDLRETYDEALRRGFDLIDTADSYGTGNLQGRSELLIGKFLLNTPSAKKKRIQIATKLAPYPWRIGNRGFNKPFLKSLERLNNKLDIVQLHWSTAKYNPWQELGLLNNLCDLKDEGFDFQIGLSNIGPKRLMKLINFLAKRDQHLKSVQIQFSLLAPDLGKQYQVKKICDENNIDFFAYSPLSFGILCIDPDKEENKEKSFIRNSLFENYKKPTYELRRCLKRIAYQRSVSQAQVAINWCCYQGTIPLVGMRKKSQVIDVSNVFNWNLKKNEFKVLQEASQKCLKKMPKNPFSSN
	4206	GC_00001629	Bin_1	JFNG01	206	DETECTED																																			MESNKKLNDLIINLKPKVIRFTGEKFPNELWNSGCQIKKNKNISS
	6987	GC_00001733	Bin_1	JFNG01	207	DETECTED		GO:0000154, GO:0001510, GO:0003674, GO:0003824, GO:0005575, GO:0005622, GO:0005623, GO:0005737, GO:0006139, GO:0006364, GO:0006396, GO:0006725, GO:0006807, GO:0008150, GO:0008152, GO:0008168, GO:0008170, GO:0008173, GO:0008649, GO:0008757, GO:0008990, GO:0009451, GO:0009452, GO:0009987, GO:0010467, GO:0016070, GO:0016072, GO:0016435, GO:0016740, GO:0016741, GO:0022613, GO:0031167, GO:0032259, GO:…		L					PS51165	THUMP domain profile.	SSF53335	SSF53335			146891.A9601_00641	Specifically methylates the guanine in position 2445 (m2G2445) and the guanine in position 2069 (m7G2069) of 23S rRNA (By similarity)			G3DSA:3.40.50.150	G3DSA:3.40.50.150	COG0116	23S rRNA G2445 N2-methylase RlmL			PF01170	Putative RNA methylase family UPF0020	SM00981	SM00981			PS00092	N-6 Adenine-specific DNA methylases signature.	Coil	Coil	MNVVASSPEGLEKSLAEEISNLGGFNINTYKRFINFECDFETFYRVHFYSRLAFRFYREIASFNCYDKQSLYAGVRDSFDWLHWLHFDKTFNVQVTGRTSSLSHTHYTALEVKNSITDLQQAVWNKRSNVSLANPDFIIHLHLNNNKAILSLQSSVESLHKRGYRPAIGNAPLKENLASGLINMTQWNGKVPLIDFMCGSGTFLIEAVNQYLGVPINIDQVYLFENWLDFRKDIYLNEKNKAKNKIINYEKLPTIIGCEINKKVFEQANVNISLAGLENYIELINNDFLALQLSCTPGIIICNPPYGKKLGDENELIYLYEQMGIFLKKNFSGWEFWLLSGNPKLTKYLKMKSSLKIPVSNGGIDCRWIKYLIR
	4314	GC_00001634	Bin_1	JFNG01	208	DETECTED				S																					PF07332	Putative Actinobacterial Holin-X, holin superfamily III									MEKPKNKNFANTASRISAIASSVMDLHVRIALQEVDREKRRLISGGIFLAIGSTLLLLVLICIHIIFYLFLTKYNNWNIEYNLLLIIFIDLVLAGLSLKLGGKLAKGPYLPQTLEGLGKTTKAVLGKK
	2949	GC_00001647	Bin_1	JFNG01	209	DETECTED				S																															METYHPPKEVEDKEDNSNLPEREVLSEKWLLEKIDSLIPLIKEKWPDIAQQTLEATKGSIDDLVEVIASHSGTSAIRIKSQLFEIIDSIREKNWEISEKIEPIESQLEELLEELNDTLRPKIESPIRKKPLLSIAIAAGIGLLIGTLLNSGRK
	1497	GC_00001637	Bin_1	JFNG01	210	DETECTED																																			MSLNFIMDITFASLIFASRTIPTDFGLVAAAIAGAGSLLFIALRFVPDAGN
	1102	GC_00001690	Bin_1	JFNG01	211	DETECTED				S																				map03410, map03420, map03430, map03450	PF13298	DNA polymerase Ligase (LigD)									MDKWVLLEHEVYNTNSKDIHYDFLVENGIDCLTWKFLTLPSLNQTSIEISKQPNHRLIWLSRIEHELSDNRGFVKRIDHGIFKNVSTDLDSENYRFILDGELLSGLFEISANSCRLSKNF
	1995	GC_00001661	Bin_1	JFNG01	212	DETECTED		GO:0003674, GO:0003824, GO:0005575, GO:0005618, GO:0005622, GO:0005623, GO:0005737, GO:0005829, GO:0005886, GO:0007059, GO:0008150, GO:0008152, GO:0009987, GO:0016020, GO:0030312, GO:0044424, GO:0044444, GO:0044464, GO:0044699, GO:0044763, GO:0071944		D	PIRSF005719	PIRSF005719					SSF75553	SSF75553			146891.A9601_00691	Required for chromosome condensation and partitioning (By similarity)	MF_01894	Chromosome partition protein Smc [smc].	G3DSA:3.40.50.300	G3DSA:3.40.50.300	COG1196	Chromosome segregation ATPase			PF02463	RecF/RecN/SMC N terminal domain	SM00968	SMC proteins Flexible Hinge Domain	TIGR02169	SMC_prok_A: chromosome segregation protein SMC			Coil	Coil	MVHINQVEFENFKSFGGNVKIPLEEGFTVVTGPNGSGKSNILDGILFCLGLANSRGMRAERLPDLINNSKVKEGKSSETSVSVKFNIQDWSPREDLPPLELEEEEIALNKGQKEWVVSRKLRLMPGGSYASTYTSDGKQCTLQQIQRILRDISVDPEGSNVVMQGDVTRIVSMNNKERRNLIDELAGVALFDTRIEQTNAKLNDVFERQERCEMLENELQSSKNKLEKECEKAKRYKELKAKLLQIIELEKVLIFEKQVKHVESIEKKESEIEKNKILFNKEKESISKEISVLEDALKILVDELKEKGEDNLIKVNSDIGSINSSLRELDRISSLNKEEGIKLQKQRDEIAISKRNIESEKMRQENFDDNFLNQLNLQIDDLTLKHKLSRKKLSDAAGE…
	4425	GC_00000269	Bin_1	JFNG01	213	DETECTED				S							SSF50346	SSF50346			146891.A9601_00701	PRC-barrel domain protein			G3DSA:2.30.30.240	G3DSA:2.30.30.240					PF05239	PRC-barrel domain									MSLSNTSANKNLPNSVPSERLWLRSELMGTQVITTDTGRRLGVVGEVVVDIDRREVVALGLRDNPLTRFLPGLPKWMPLESIKQVGDVILVDSLDSLSESFSPERYGNVINCQVITESGQLLGRVLGFSFDIETGDLISLVMGAVGVPLLGEGVLSTWEIPVEEIVSSGTDRIIVYEGAEEKLKQLSSGLLEKLGVGGSSWDEREVNGYSSNLVPVENQLLSGSESEQQNNLVEEYEEVVEQ----DDYEDDYEDELEYVEIKGSEEELNNRKKLYMDNDDSDQIHSQNSVNQIDQKNNIDFKQKKQSTTNLASKRPIQNATETLDIEPLNEQNLVQDNKKSEKFEIDDPW
	4141	GC_00001448	Bin_1	JFNG01	214	DETECTED				S							SSF53756	SSF53756			167546.P9301_00701	Lipid-A-disaccharide synthase								map00540, map01100											MYSGLTAMKKETVAVVIISNGPGELTTWVNPVVDEINKINKSLCDEDKQDFNLRLVLVPCPNATGKEFLVANSWNKFELITKSKSFWKLLIKPHSFADWPKKGIVIFLGGDQFWSILLAKRLGYLNITYAEWVSRWPKWTNEIAAMNVKVKELIPKRYKYKCKVIGDLMADIKLNSEISLRNKEKHYIALLPGSKKAKLSIGIPFFLEVADHIAKKNQNINFIIPIAPTTDTSEYLFFQSDKNPIAKYYSSKIKTIKNLKDSSFDYVIETSKKTKIYLIEKHPCYEILKECDLAITTVGANTAELAAISLPMLVVLPTQHLNMMNAWDGIFGVVGKISFINRFLTFIIKNFYFKKKKFFAWPNIKAKRMIVPERIGNISTIKIAREVLFLIKNRDQLKS…
	6356	GC_00000529	Bin_1	JFNG01	215	DETECTED				I					PS50975	ATP-grasp fold profile.	SSF56059	SSF56059			167546.P9301_00711	acetyl-CoA carboxylase, biotin carboxylase			G3DSA:3.30.470.20	G3DSA:3.30.470.20	COG0439	Biotin carboxylase		map00061, map00253, map00620, map00640, map00720, map01100, map01110, map01120	PF02786	Carbamoyl-phosphate synthase L chain, ATP binding domain	SM00878	Biotin carboxylase C-terminal domain	TIGR00514	accC: acetyl-CoA carboxylase, biotin carboxylase subunit	PS00867	Carbamoyl-phosphate synthase subdomain signature 2.			MVEKVLIANRGEIALRIVRSCRELGIATVAVFSTVDKKALHVQLADEAVCVGDSLSNKSYLNIPNILAAATSRGVDAIHPGYGFLAENDKFAEMCNDHGIVFIGPSPKAIRSMGDKSTAKETMEAVGVPTVPGSKGLLSNVDEAYKLADDIGYPVIIKATAGGGGRGMRLVENSDNLEKMFKAAQGEAEAAFGNDGLYMEKFIKKPRHVEIQILADRSGNVVHLGERDCSVQRRHQKLLEESPSPAINTALRKKMGNAAIAAAKSIGYEGAGTVEFLVDDDDNFYFMEMNTRIQVEHPVTEMVTGVDLIAEQIKIASGANLEFNQDDIHLNGHAIECRINAEDPSHNFRPSPGKITGWLPPGGPGVRVDSHVYTGYEIPPFYDSLIGKLIVWGKDRNTA…
	9109	GC_00001630	Bin_1	JFNG01	216	DETECTED				S											74546.PMT9312_0063	YGGT family					COG0762	Uncharacterized conserved protein YggT, Ycf19 family			PF02325	YGGT family									MISLLVNSLQILDISLGISLSYLTIVFLIRLILTWYPKVDLSKGLWLLVSIPSSSILNLTRKLIPPIGGVDVGPVIWIGFISFLREILVGQQGLIKLALHTHIS
	5940	GC_00001658	Bin_1	JFNG01	217	DETECTED																	MF_01388	Photosystem II reaction center X protein [psbX].	G3DSA:1.20.5.510	G3DSA:1.20.5.510					PF06596	Photosystem II reaction centre X protein (PsbX)									MFQISSLLLAADFSAEVANNSAVGMIGSFIAAALLIVIPATAFLIFVSQKDSLDRTSTGRR
	2942	GC_00001133	Bin_1	JFNG01	218	DETECTED				S											167546.P9301_00741	Ycf66 protein									PF07444	Ycf66 protein N-terminus									MVNASLNWASIVGIVLAVCGGGLYFLRSFKPALARDYDVFFAAIGLLCGGILFFQGWRLDPILQFGQFLLAGTTVFFAYESVRLRGVATDQARRSSYFDDDPISDVPRNSRGRFNDDYDRFEESERRSRRFKPQEDEFEEDYNTEGRSRRRNVSRAIPSAAASRSRPSTREISQFENNEPIRRRRQTSEDRNSKQPEINNFGERRNLSRDEVKTGSRPRMNRAVSRQDNISPPADSSTLRKKPTRSPIRQQTSTAQVEDASFKDANQAKKPRESRRVSSSTRSSSKNQNSRYNVGTSKKKPRDNSSRFDD
	7241	GC_00001643	Bin_1	JFNG01	219	DETECTED				S							SSF103511	SSF103511			167546.P9301_00751	High light inducible protein			G3DSA:1.10.3460.10	G3DSA:1.10.3460.10					PF00504	Chlorophyll A-B binding protein									MNSKEEQTNSEVNNLENESFIEQQKDQNYINEQIGDNQLDEKPIEIKDEYKFGWSSYSEKTNGRFAMIGFLSIILIELFSKQSFLKWAGIL
	7013	GC_00000053	Bin_1	JFNG01	220	DETECTED		GO:0005575, GO:0005623, GO:0005886, GO:0016020, GO:0044464, GO:0071944		S					PS50893	ATP-binding cassette, ABC transporter-type domain profile.	SSF52540	SSF52540			146891.A9601_00771	ABC transporter			G3DSA:3.40.50.300	G3DSA:3.40.50.300	COG4178	ABC-type uncharacterized transport system, permease and ATPase components		map02010	PF06472	ABC transporter transmembrane region 2	SM00382	ATPases associated with a variety of cellular activities			PS00211	ABC transporters family signature.			MNTVVNNKSKFILQLQKLRKLSQPFFLPIDQCNGFQFIWLLISLLFCVGGVVLVGLTGIISFFESFQPIFLEKYFGGVVSTVNSIWAGSWGLLFSALFLIGSGSFFSLRRQLKNRRWLHWLFLAIIVLMLLAVNGINAGIGFIARDLTNALVEKQEDGFYRILGIYACCFAVALPIRVSQIFFTYKLGIIWREWLSKSLVKDYMTNKAYYQLNPNDEEQTDVDNPDQRITDDTRAFTGQSLSFTLGIFDALLTFSLNILILWSISTTLTFSLFGYAAFATSILLIAGKNLVKIDFDQLRYEADFRYGLVHIRDNAESIAFYSGENPERNETERRLGEVVRNFNLLIIWRVIIDVMRRSINYAGNFFPYLIMAIPYFKGDIDYGRFIQASFAFGMVEGSL…
	9225	GC_00000737	Bin_1	JFNG01	221	DETECTED																																			MNTPDSLNTESKNLFNLISKNWEELDDSLKTKLIKIWKVLTYKWQLQILFNLPFLLWWALDKSFPKVHEFDATILNYLNLPDWALSFIGFGQ
	7381	GC_00000999	Bin_1	JFNG01	222	DETECTED				F, G			PR00332	Histidine triad family signature	PS51084	HIT domain profile.	SSF54197	SSF54197			146891.A9601_00791	histidine triad (hIT) protein			G3DSA:3.30.428.10	G3DSA:3.30.428.10	COG0537	Diadenosine tetraphosphate (Ap4A) hydrolase or other HIT family hydrolase		map00230, map00240	PF11969	Scavenger mRNA decapping enzyme C-term binding					PS00892	HIT domain signature.			MLSQLINLMTETTIFQKIINEEIPCDKLYEDKFCIAFNDIQAQAPVHFLVIPKKPIISLLDCIEEDVNLLGHLLYVGSKIAKSKNLTNWRTVINTGAESGQTVFHLHIHFLSGRKLNWPPG
	6877	GC_00000251	Bin_1	JFNG01	223	DETECTED				J	PIRSF004749	PIRSF004749	PR01576	Peptide deformylase signature			SSF56420	SSF56420			167546.P9301_00791	Removes the formyl group from the N-terminal Met of newly synthesized proteins. Requires at least a dipeptide for an efficient rate of reaction. N-terminal L-methionine is a prerequisite for activity but the enzyme has broad specificity at other positions (By similarity)	MF_00163	Peptide deformylase [def].	G3DSA:3.90.45.10	G3DSA:3.90.45.10	COG0242	Peptide deformylase			PF01327	Polypeptide deformylase			TIGR00079	pept_deformyl: peptide deformylase					#NAME?
	2907	GC_00000076	Bin_1	JFNG01	224	DETECTED				E							SSF53474	SSF53474			167546.P9301_00801	Peptidase S9 prolyl oligopeptidase active site			G3DSA:3.40.50.1820	G3DSA:3.40.50.1820	COG1506	Dipeptidyl aminopeptidase/acylaminoacyl peptidase		map00310, map00780, map01100	PF00326	Prolyl oligopeptidase family									MSNDDQLKVRQTVSKKKSFKELTIVRNIIFWVDFVGEDQNENAIFARPFNEKEAFPQKLISKKYNIKNNFHGYGGKSYKCIYLKNNFYLIWIDQITNAVWFQIFKEEASNYRIQKRYLDSVQEPRQLSKSIDGNFDSSFVISQKNFLYGICEINNRDYLFSLNLKKTKQDIYRIKKFKNFAGELSSNTSVSLLSWVEWDYPYMPWEKNDLCFAQIDLDGEITKIKKFSDKLINAKKKVSFFQPYWISETLLVCSEDSSGWWNLLFLEASKIENIFIKKRVERNFVEYGVPQWVSGITFFSGDIKDLFCLAKKENNLVVEQYKDLQFVKEFSTPFTSISDFSVFEKKVVMKGHGYDFLGNLLEIDCKKEVLSNVFEEINAEYIKDSSKPESFWFKGFQAQ…
	1617	GC_00000143	Bin_1	JFNG01	225	DETECTED		GO:0005575, GO:0005623, GO:0005886, GO:0008150, GO:0016020, GO:0040007, GO:0044464, GO:0071944		E	PIRSF005572	PIRSF005572					SSF53383	SSF53383			74546.PMT9312_0072	Cysteine desulfurase			G3DSA:3.40.640.10	G3DSA:3.40.640.10	COG0520	Selenocysteine lyase/Cysteine desulfurase		map00450, map00730, map01100, map04122	PF00266	Aminotransferase class-V			TIGR01979	sufS: cysteine desulfurase, SufS family	PS00595	Aminotransferases class-V pyridoxal-phosphate attachment site.			METIQNFAEITKKDFPLLNKNLKSNEQIIYLDHAATTQKPVQVLKKIDEYYKNFNANVHRGAHQLSAKATEEFENARYLISKYIKANSAKEIIFTRNATEAINLVAKSWGEYSLKENDEILLSIMEHHSNIVPWQMVAAKNKCKLKFTGIDKDGKLDLEDFKSKLTSRTKLVSLVHISNTLGCCNPIKEITKLAKQKGSLVLIDACQSLAHQKLDVIDLNIDFLAGSGHKLCGPTGIGFLWSRKEILEKIPPLFGGGEMIQDVFEETSTWAELPHKFEAGTPAIAEAIGLAEAINYINNIGLNEIHEYEKNITRYLFEKLNQIENIEIIGPSPEIDPYRASLATFYIKNMHSNDIAEILDSKGICIRSGHHCCQPLHRYIGINSTARISMNFTTNKEEI…
	2356	GC_00000236	Bin_1	JFNG01	226	DETECTED		GO:0008150, GO:0008152, GO:0009058, GO:0009607, GO:0016043, GO:0016226, GO:0022607, GO:0031163, GO:0040007, GO:0044085, GO:0044403, GO:0044419, GO:0050896, GO:0051701, GO:0051704, GO:0051707, GO:0052173, GO:0052200, GO:0052564, GO:0052572, GO:0071840, GO:0075136		O							SSF101960	SSF101960			93060.P9215_00831	feS assembly protein SufD					COG0719	Fe-S cluster assembly scaffold protein SufB			PF01458	Uncharacterized protein family (UPF0051)									MEIIEKIKTNKSNENLTEIQKICLHKLQSSPLPNPKSELWRLSNKSKLSNFLDYSVNEKDSNFDIPYPKNSQSIIRLIIGENCEIKLIEKNYSIQQLSEDELQKYIKEQISFFNQNENWSDLLNLSLSCKNNILGLKINGSKIPPIEIFSHASSNSLNAKTLVIFLEKNCDVDLLQVNLGKENSSLSQSTFFCLKENSSVNHGVVSFGESRSNLLNSLNVIQQKNSAYNLGSLHFKFNYARFEISIKQSAGNAKTNIKGMQITKKDEQISTYTKIEFNGPNGFLDQINKSLADDKSHAIFEGSIIVPKIAQRTDASQLSRNLLLSNLAQIDTKPQLEIIADDVKCKHGATISQLNEEELFYMRTRGITLTEASKLQLSSYFQEVISFIPISKDRWDLLD…
	7455	GC_00000055	Bin_1	JFNG01	227	DETECTED		GO:0005575, GO:0005623, GO:0005886, GO:0008150, GO:0016020, GO:0040007, GO:0044464, GO:0071944		O					PS50893	ATP-binding cassette, ABC transporter-type domain profile.	SSF52540	SSF52540			146891.A9601_00841	feS assembly ATPase SufC			G3DSA:3.40.50.300	G3DSA:3.40.50.300	COG0396	Fe-S cluster assembly ATPase SufC			PF00005	ABC transporter	SM00382	ATPases associated with a variety of cellular activities	TIGR01978	sufC: FeS assembly ATPase SufC	PS00211	ABC transporters family signature.			MQSKMKESDPILEVENLSASTDSLPILKGVSLTVYPGEIHAIMGRNGCGKSTLSKIIAGHPSYNITNGDIKFLGENINSLEPEERSQSGIFLGFQYPIEIPGVSNLEFLRVSTNARRKFLNKEELDTFDFEELVKEKLEIVQMDHAFLSRSVNQGFSGGEKKRNEILQMALLEPKIAILDETDSGLDIDALRIVASGIKKISNAETGIILITHYQRLLDEIKPNYVHVMSDGQIIKTGESDLALELEEKGYEWTDNFIKKT
	2738	GC_00000156	Bin_1	JFNG01	228	DETECTED		GO:0003674, GO:0003824, GO:0004518, GO:0004519, GO:0005488, GO:0005575, GO:0005622, GO:0005623, GO:0005737, GO:0005829, GO:0006139, GO:0006725, GO:0006807, GO:0008150, GO:0008152, GO:0009058, GO:0009987, GO:0016043, GO:0016226, GO:0016787, GO:0016788, GO:0022607, GO:0031163, GO:0034641, GO:0040007, GO:0043170, GO:0044085, GO:0044237, GO:0044238, GO:0044424, GO:0044444, GO:0044464, GO:0046483, GO:…		O							SSF101960	SSF101960			146891.A9601_00851	FeS assembly protein SUFB					COG0719	Fe-S cluster assembly scaffold protein SufB			PF01458	Uncharacterized protein family (UPF0051)			TIGR01980	sufB: FeS assembly protein SufB					MVNENLVKDVVKEPYKYGFVTDIETEKIEKGLNENIIKLISQKKEEPKFLLDFRLKAFKKWLKMKEPDWAALGYKKIDYQDIIYYSAPKQKEKISSLDEVDPKLLETFDKLGIPLTEQKKLTNVAVDAVFDSVSIATTFREELAEHGVIFCSISEAVKNHPDLIEKYLGTVVPASDNYFAALNSAVFSDGSFVYIPKGVNCPMDLSSYFRINSGDSGQFERTLIIAEESSSVSYLEGCTAPMFDTNTLHAAVVELIALDDASIKYSTVQNWYAGDEEGIGGIFNFVTKRGKCLGKRSKISWSQVETGSAITWKYPSCLLLGEESVGEFYSVALTNNLQQADTGTKMIHIGPKTKSTIVSKGISTGKSKNSYRGLVKMGTKATGSRNYSQCDSMLIGDQA…
	4306	GC_00000682	Bin_1	JFNG01	229	DETECTED				S																															MSNHLDPLSNPLNIETIQEIDNLDLPLMQKHHLRILAHCLQILKIINVDNSLEYQNKNHLREWCDNQSKKFDDKKFSDLFYEQLDSTSKKLGTFSKKIGKSIEDLEIDDLVLLVEQR
	4247	GC_00000200	Bin_1	JFNG01	230	DETECTED				S											167546.P9301_00861	Rho termination					COG3330	Uncharacterized conserved protein			PF16258	Domain of unknown function (DUF4912)									MNKDQLLSLTLRQLRQEASRLSVPLYSRKTKAVLVDLILKYQEKSTKKTYTIPLESKSEETYESNVPNSSEEVKTNVVFLPRDPDWAYVFWQISDADREKAQSLGANKLCLRLFDASGSEGSNLNQGTLREIAVDSYSTEWYLPIPLADRDYKVELGYKYGFNWMSLAFSSISHVPGSHPSEQILDKFVPFNLDSTSESIPDISNPVVSEQNGMHERLYQAATNIPLRRKVGSEEFMENVNSTNLSDNLTDSGAGKWSSGLNDSGSGIVKNRSFWLVADAELIVYGATEPSAKLTIGGEDVPLAADGTFRIQVPFRDGTQKYDIKAVDVSGEQEKSISMKFDRTTPLDDTNEKDNAETEWF
	6247	GC_00001632	Bin_1	JFNG01	231	DETECTED				S											146891.A9601_00881	Membrane																			MLKKIVAFTPLFGALTFPLIVPITISKFGVNYGILSALLISSLWFIAMLRTSEMPH
	7343	GC_00000029	Bin_1	JFNG01	232	DETECTED		GO:0003674, GO:0003824, GO:0004614, GO:0005575, GO:0005622, GO:0005623, GO:0005737, GO:0005829, GO:0005975, GO:0005984, GO:0005991, GO:0005992, GO:0005996, GO:0006012, GO:0008150, GO:0008152, GO:0009056, GO:0009058, GO:0009311, GO:0009312, GO:0009987, GO:0016051, GO:0016052, GO:0016853, GO:0016866, GO:0016868, GO:0019318, GO:0019320, GO:0019388, GO:0034637, GO:0044237, GO:0044238, GO:0044249, GO:…		G			PR00509	Phosphoglucomutase/phosphomannomutase family signature			SSF55957	SSF55957			146891.A9601_00891	Phosphoglucomutase (EC 5.4.2.2			G3DSA:3.30.310.50	G3DSA:3.30.310.50	COG0033	Phosphoglucomutase		map00010, map00030, map00052, map00230, map00500, map00520, map00521, map01100, map01110, map01120	PF02880	Phosphoglucomutase/phosphomannomutase, alpha/beta/alpha domain III					PS00710	Phosphoglucomutase and phosphomannomutase phosphoserine signature.			MNQVSVININSPFLDQKPGTSGLRKSTLKFQEDHYLEVFIEAILQSLEDLQGSTLVVGGDGRYGNIEAIEKIVQICIAHKVQKVIVPKYGLLSTPATSHLIRKENAIGGIILSASHNPGGIDGDFGVKLNISNGGPAPEIITNKIFKASQLLTSYKICKIQLPDFSEYGTYPYDETTLEIIDGLTDYSNLMEKIFDFDQISDFLKKDFSLIFDAMNAVTGPYAKNIFVEKMGLSPDCVMNGYPLKDFGGLHPDPNLTYASHLADLLLNKKSYSFGAACDGDGDRNMILGSGCFVNPSDSLAVITANTKCVPGYKDGITGVARSMPTSSAVDNVARALNIPCFETPTGWKFFGNLLDSNLITLCGEESFGTGSNHVREKDGLWAVLYWLQVLAEKKSSVS…
	3090	GC_00000111	Bin_1	JFNG01	233	DETECTED				L							SSF48019	SSF48019			146891.A9601_00901	recombination factor protein RarA			G3DSA:1.20.272.10	G3DSA:1.20.272.10	COG2256	Replication-associated recombination protein RarA (DNA-dependent ATPase)			PF12002	MgsA AAA+ ATPase C terminal	SM00382	ATPases associated with a variety of cellular activities					Coil	Coil	MHSENLFTNYSQIENNAPLADKLRPKNLEDFFGQQLILNDNSLLRSAILNDKISNFIFSGPPGVGKTTLIEIISFNTRSKLIKLNAVLSSVKELRNEIANAKDRLSNSKRKTILFIDEVHRFTSVQQDALLPSIENGTITFIGATTENPFFAVNKALVSRSRIFTLLPLAENDLQKIIQKVITHYSKQKDSKKVYLTQDAISHLIKFSGGDARTLINALEMAIETTAENDAKEININLSIAEDALQKKNIVYDKNGQNHYDVISAFIKSIRGSDPDATLFWLANMLEAGEDPNFIFRRLLISASEDIGIADPNAIVVVQSCCDAFDRVGFPEGLYFLTQASLYLAISPKSNSTKSIFRAIERIKSINAFDVPLHLKNNSNSYVNPHNYPGNWVAQEYLP…
	3556	GC_00001025	Bin_1	JFNG01	234	DETECTED				M							SSF56214	SSF56214			146891.A9601_00911	4-phosphopantetheinyl transferase			G3DSA:3.90.470.20	G3DSA:3.90.470.20															#NAME?
	669	GC_00001252	Bin_1	JFNG01	235	DETECTED		GO:0003674, GO:0003824, GO:0004601, GO:0006950, GO:0006979, GO:0008150, GO:0008152, GO:0008379, GO:0016209, GO:0016491, GO:0016667, GO:0016671, GO:0016684, GO:0016705, GO:0032843, GO:0044710, GO:0050896, GO:0051920, GO:0055114		O	PIRSF000239	PIRSF000239			PS51352	Thioredoxin domain profile.	SSF52833	SSF52833			146891.A9601_00921	alkyl hydroperoxide reductase Thiol specific antioxidant Mal allergen			G3DSA:3.40.30.10	G3DSA:3.40.30.10	COG1225	Peroxiredoxin			PF00578	AhpC/TSA family									MALKVGDKAPEFKLKDSFEKEVSLNDFKGKRIILYFYPKDNTPGCTKEACNFKENWDLLQKNNIVVLGISKDNASSHQKFIEKFNLPFILLTDPEPFKVSSDYDSYGLKKFMGKEYMGMMRNTFLIDTEGNIEKIYLKVKAAIMADHIIADLGLS
	8047	GC_00000783	Bin_1	JFNG01	236	DETECTED		GO:0005575, GO:0005622, GO:0005623, GO:0005737, GO:0044424, GO:0044464		K							SSF53067	SSF53067			146891.A9601_00931	Catalyzes the phosphorylation of pantothenate (Pan), the first step in CoA biosynthesis (By similarity)			G3DSA:3.30.420.40	G3DSA:3.30.420.40	COG1521	Pantothenate kinase type III		map00770, map01100	PF03309	Type III pantothenate kinase			TIGR00671	baf: pantothenate kinase, type III					MVSDINFLLVGNSRLHWAKYSNNESQFFHTKKDQKVPENIDLDQLIWASVGKLPNFLLKKENEIKTKDIQLSNLPDYLGVDRALASIAALKIIENPLKKDLLIADFGTILSITKLNSNGSIIGGQLIPGFLTQLKSMEQNTKNLKVPKKYDIPIKDFLINTEEAILKGVINSLTGVINSLFNPEKDILIICGGDSQLLTKSLKTKKENIINAPNLVMEGMIIHHLSIKN--
	2833	GC_00000171	Bin_1	JFNG01	237	DETECTED		GO:0000096, GO:0000097, GO:0003674, GO:0003824, GO:0004604, GO:0005488, GO:0005575, GO:0005622, GO:0005623, GO:0005737, GO:0005829, GO:0005886, GO:0006082, GO:0006520, GO:0006534, GO:0006535, GO:0006563, GO:0006790, GO:0006807, GO:0008150, GO:0008152, GO:0008652, GO:0009058, GO:0009069, GO:0009070, GO:0009987, GO:0016020, GO:0016053, GO:0016491, GO:0016667, GO:0016671, GO:0019344, GO:0019752, GO:…		P	PIRSF000857	PIRSF000857					SSF52402	SSF52402			146891.A9601_00941	Reduction of activated sulfate into sulfite (By similarity)			G3DSA:3.40.50.620	G3DSA:3.40.50.620	COG0175	3'-phosphoadenosine 5'-phosphosulfate sulfotransferase (PAPS reductase)/FAD synthetase or related enzyme		map00920, map01100, map01120	PF01507	Phosphoadenosine phosphosulfate reductase family			TIGR00434	cysH: phosophoadenylyl-sulfate reductase			Coil	Coil	MIENIHKDIQPNLRKYNQELVDMKPQEMLTWGYEKFDNQFAITTSFGIQSSVLLNMVSKLFLQKKIKIFWIDTGYLPPETYHYAEKLIEDLSLEVEVLQSEFSPARMEAKYGKLWETNKGSDLDKYHDLRKIKPLDNGLEKFNIYCWASGVRSSQTENRKKMKFLDVIRQRLSLRPLLNWTNKDIFYYMKENNLPAHPLFLKGYSSVGDWHSSSPDGIEIKGRDTRFGGIKQECGIHTND
	9067	GC_00000068	Bin_1	JFNG01	238	DETECTED				C			PR00368	FAD-dependent pyridine nucleotide reductase signature			SSF51905	SSF51905			146891.A9601_00951	NADH dehydrogenase			G3DSA:3.50.50.60	G3DSA:3.50.50.60	COG1252	NADH dehydrogenase, FAD-containing subunit		map00190	PF07992	Pyridine nucleotide-disulphide oxidoreductase									MKSIQKPIVIVGAGFAGMTFALNLKNLNPSLPILVVDSETNFIFKPLMYEVLSKEIRNWEATPKFANIFSDAGVTFLRNCLTKISFKENIIEFSDELKLSYQYLVICTGSIPNSFFIKGVDENCYFFNDVHDLNKLNSFLKKSQDTALHKKLFIVGGGPSGIELACKIKDIFTDQFEINVIEKSNEILNKNKIFNREQAEKALEKRKINVLLNSTVKEVSETKISISSEVGITSLDKDIVIWTAGVKPNLSYLETDQITKKFGRILVNNNFQIENHKNCFAIGDISVIEGMEDLPITAQVAMQEGNHLANNLELLIQGKDPLPFEFQDNGEMISLGIGEASISGLGVTLSGKLAFEARRLIYASKLPDITESLKSASSWIFQKKSIFKKFLKKDYSN
	2759	GC_00000085	Bin_1	JFNG01	239	DETECTED		GO:0005575, GO:0005623, GO:0005886, GO:0016020, GO:0044464, GO:0071944		P					PS51202	RCK C-terminal domain profile.	SSF116726	SSF116726			146891.A9601_00961	)-transporter			G3DSA:3.30.70.1450	G3DSA:3.30.70.1450	COG0471	Di- and tricarboxylate transporter			PF03600	Citrate transporter					PS01271	Sodium:sulfate symporter family signature.			MNLISVVSDNFDAFITVVVLIMSIILFIRNTIAPELTGLLCVGIFISTGVLSPEKALAGFGSPSLITLMGLFAVSSALFKSGALDRVRELISSESIRTPRKLISLIAFLIAPISGIVPNTPVVASLLPLIESWCERRNISPSKVLLPLSFATLLGGTLTLLGSSVNLLVSDISQQLGYGGLELFSLTSIGIPVWLIGTIYMILVSDILLPDRGRDKEFIKNGDMNIYFTEVTIPSTSELVGQSVRNSRLQRRFDVDVLELQRNGKVILPPLADRKIEPDDRLIIRVTRADLFRLQQEHTILLGENKKSFDGANVFSDDEGTKTFEALLPAGSTLAGASLRELRFRQRHNATVLALRRGQQTVQERLGQAVLRAGDVLLLQAPLDSIRGLQASNDLLILD…
	1569	GC_00000647	Bin_1	JFNG01	240	DETECTED		GO:0005575, GO:0005623, GO:0005886, GO:0016020, GO:0044464, GO:0071944		P											167546.P9301_00961	Potassium uptake protein					COG0168	Trk-type K+ transport system, membrane component			PF02386	Cation transport protein									MNFTSKVYKLKDAYKKLSVPQFTIVTGLFIICLGTLILSSPLCSSSKVGLWEAFFTSTSAITVTGLTIIDIGVDLNFFGQVLLAFMLLSGGLGLMAITTFLQGFVVKGTKLRTRLDKGKTLDEFGVGGIGRTFQSIAITAISIISLGAIVLYSFGFVDIQNNWERLWSSIFHSISAYNNAGFSLMSNSLQDYRTNYLVNSVFVFLIVMGGLGWRVLDDIWSHKKNLSYKKLSLHSRLVIRTSLSLILFGSLGFFITESLLNSQFFNDLNFFERIISSIFETVSARTAGFTNFPISLNSISDTGLLLLMTLMFIGASTGGTGGGIKTTTFIALMAATRSTLRGQKDVIISNRLISDKVILKAVGITVGSLLFVLLMAMLLSTTNTFVKKESFTFLEILFT…
	7232	GC_00000131	Bin_1	JFNG01	241	DETECTED				P					PS51202	RCK C-terminal domain profile.	SSF51735	SSF51735			167546.P9301_00971	domain protein			G3DSA:3.40.50.720	G3DSA:3.40.50.720	COG0569	Trk K+ transport system, NAD-binding component			PF02254	TrkA-N domain									MADWWQWSQKRENEVLTFAVVGVGRFGTAVCRELISNGADVLAADYSEKAIDDLRQLEPSIEARVVDCTDEESMKESGILEMNTVVVGISEPIEASITTTLIAKDSEGSKVKRVIARATSDLHEKMLKRVGADKVVFPSRMQGERLGLELVRPNLIERLELDNQTGIDEITVPEEFIGRSLRDLNLRKNYLVNVLAAGPAEELTVNPPAKYILERGNILVVMGKTVDLQKLPQN
	4584	GC_00000514	Bin_1	JFNG01	242	DETECTED				S																					PF07878	CopG-like RHH_1 or ribbon-helix-helix domain, RHH_5									MATRQNSTNGKPKSPRIQVVLPELICEQLTLLADNESRTVSNMAKVLIQEGIKKYFEKESKSPVSENNLNTDKFRDELEKQSVRRLKRAPQRIRYYKKSD
	2290	GC_00000444	Bin_1	JFNG01	243	DETECTED				S																															#NAME?
	1979	GC_00000403	Bin_1	JFNG01	244	DETECTED				S																															MSSNAEKLYELIANDSKKKQSLFMTALTNPKKALDKICDIGKELDISVTKEEVIEYLSTIDDEATKMWLIKARGGL
	4716	GC_00000367	Bin_1	JFNG01	245	DETECTED																																			MKRIEQIVVIFIAAALAIPSYWFFWTLAGGGGYNKRIKPIPNPNNNYSKPFPKDLLEP
	7329	GC_00000773	Bin_1	JFNG01	246	DETECTED		GO:0003674, GO:0003824, GO:0005215, GO:0006139, GO:0006152, GO:0006163, GO:0006195, GO:0006200, GO:0006725, GO:0006753, GO:0006793, GO:0006796, GO:0006807, GO:0006810, GO:0006950, GO:0008150, GO:0008152, GO:0009056, GO:0009116, GO:0009117, GO:0009119, GO:0009123, GO:0009125, GO:0009126, GO:0009128, GO:0009141, GO:0009143, GO:0009144, GO:0009146, GO:0009150, GO:0009154, GO:0009158, GO:0009161, GO:…		S					PS50893	ATP-binding cassette, ABC transporter-type domain profile.	SSF52540	SSF52540			146891.A9601_01041	ABC transporter			G3DSA:3.40.50.300	G3DSA:3.40.50.300	COG0488	ATPase components of ABC transporters with duplicated ATPase domains			PF00005	ABC transporter	SM00382	ATPases associated with a variety of cellular activities			PS00211	ABC transporters family signature.	Coil	Coil	MIRFEGVSKIYSTDVVLKNISWEIKKGEKVGLVGSNGAGKSTQFKILIGEEEQTSGTIIKEGNPKIAHLKQEFDCNLNFSVRQELESSFKDIQIVAIKLLEIENKMKSLDTKKNSDELEIFVNQLAKYQAKFEALGGYKMQSDVEKILPKLGFSLEDADKLVGNFSGGWQMKVALGKIILQKPDLLLLDEPTNHLDLETIFWLEEYLSSLKIAVIIISHDRYFLDKLCKKIIFVDRGTSETYNGNYSFFVEQKSLNEESQNKAYQLQQKEIELQKRYIDRFRASATRSSQAKSREKQLKKISKIEAPIAKSKSPVFNFPECPRSGKLVLNIKNLSHSFEDKILFLDINLKISSGEKIAILGPNGCGKSTLLKIIMKKIYPEIGEINLGNHNIITSYYEQ…
	2900	GC_00000340	Bin_1	JFNG01	247	NOT DETECTED				S																															MKNYDFQEKHFQISDPIESYFECIISCDIRDGRCISRCVEILKGNDN
	4	GC_00000922	Bin_1	JFNG01	248	DETECTED		GO:0003674, GO:0003824, GO:0005575, GO:0005576, GO:0005618, GO:0005623, GO:0005886, GO:0005887, GO:0006508, GO:0006950, GO:0008150, GO:0008152, GO:0008233, GO:0008236, GO:0009056, GO:0009057, GO:0009405, GO:0016020, GO:0016021, GO:0016787, GO:0017171, GO:0019538, GO:0030163, GO:0030288, GO:0030312, GO:0030313, GO:0031224, GO:0031226, GO:0031975, GO:0040007, GO:0042597, GO:0043170, GO:0044238, GO:…		O			PR00834	HtrA/DegQ protease family signature	PS50106	PDZ domain profile.	SSF50494	SSF50494			167546.P9301_01041	serine protease			G3DSA:2.40.10.10	G3DSA:2.40.10.10	COG0265	Periplasmic serine protease, S1-C subfamily, contain C-terminal PDZ domain		map02020	PF13365	Trypsin-like peptidase domain	SM00228	Domain present in PSD-95, Dlg, and ZO-1/2.							--------MNKKSKLKRDIQKLLLIVSLITVGIRYPAKIISQPLSKTKINEVN--LYSNKSFITKAVERTGAAVVTIDTQRYVKKRNFPRNSQLFLDPYFERFFGLDFPNENRPRIEQNQGSGFIFADELVMTNAHVVNGSDKVIVGLTNGKKLNAKLIGQDSFTDLAVLKIEGKGPWPKAKLGDSEKIKVGDWAIAVGNPFGLENTVTLGIISNLNRNVTQLGIYDKKLELIQTDAAINPGNSGGPLLNSDGEVIGINTLIRSGPGAGLSFAIPINKAKEIAYQLLKNGKVIHPMIGISLIEESISERKNIVVKVGYIVPNSPAEKSGIKIDDILIKIGNKNIETASDVIEQISKNGIKKQVNILLKRKNKFIKLKVIPTDITNLQNN
	6866	GC_00000417	Bin_1	JFNG01	249	DETECTED				S																					PF11189	Protein of unknown function (DUF2973)									MTILFPIIYSAALTYLVWKAFKVMSNGWGISDNKNQRLSTSSFKQKKYTIHPELLDKSGNITNEELLTVRFSNENDTTLEEKGSTTD
	1601	GC_00000498	Bin_1	JFNG01	250	DETECTED				S																															MELRTKIVSAVIRSLKLPPRFRLKMVKEDPVRLELSLTPSYGKNPIIVGIVESLDLVARRDREGRLPRDLQGTWDWTVRHGKVSTGGWNPMLKEALQTMFDTGLPAIVFEELTGDEYRPVDGVRHVK
	3616	GC_00000443	Bin_1	JFNG01	251	DETECTED				S							SSF103511	SSF103511			146891.A9601_01091	High light inducible protein			G3DSA:1.20.1620.10	G3DSA:1.20.1620.10				map00860, map01100, map01110											MNNDNQPRFGFVNFAETWNGRMAMMGILIGLGTELITGQSILRQIGIG
	4579	GC_00000631	Bin_1	JFNG01	252	DETECTED																																			MNYFLKANKNLLTYSLIILIVIPIFGFNFFISFVGNILLLLFLIPLLLLVLVFIGFNSYKSKINTCSNCGAISLGLSGTCMNCGADLENINKKNELDKKPSESTIEVEAEEIK
	2579	GC_00001146	Bin_1	JFNG01	253	DETECTED				S	PIRSF035875	PIRSF035875									146891.A9601_01111	Serum resistance locus BrkB-like protein					COG1295	Uncharacterized membrane protein, BrkB/YihY/UPF0761 family (not an RNase)			PF03631	Virulence factor BrkB									-----MQRSSTWILKSLWGACERWSKSDCVDLSAAFAYYTLQSFFPILLISLSIASWFLGKQEGLDQQIIAIAAQILPPSVVELVETTLFNLIDQGFGAGILGAMFLLFTAGNAYLSLQRGSDRLWEDEIPSKKVNAAWRVQASKFLRNRVEAFLIVFFIGFLMVLDQISANLRMIPSNVLENISKSNNLISDLLLKLPLLQVGKFAIPLIGFSLMALLLQALLPSRKVPLKPLLPGSFLIGIGLTTLNLAVSKSILSLGVRFQAYGFIGGFLVLTLWVWLLGVILYFGQCWSVVIASMTLVNKKRKHR
	8938	GC_00000843	Bin_1	JFNG01	254	DETECTED				G			PR00377	Inositol monophosphatase superfamily signature			SSF56655	SSF56655			146891.A9601_01121	inositol mono-phosphatase			G3DSA:3.30.540.10	G3DSA:3.30.540.10	COG0483	Archaeal fructose-1,6-bisphosphatase or related enzyme of inositol monophosphatase family		map00521, map00562, map01100, map01110, map04070	PF00459	Inositol monophosphatase family									MNPPNLTNKQLSELDYLFELVSQRQTKDFGNISASNKADGSLLTSCDLWSDKTIVDGLASIAPGEGVLSEEGQKLIPNSKAYWVVDPLDGTTNFAAGIPYWSISVARFVDGKPQSSFLIIPSLKKKFLSIKGKGVWLNNKKIDPSQINRQSECISLCSRSIKILQKKPTSVFPGKIRLLGVSSLNLTSVAMGQTFGAIESTPKIWDIAAAWLLLEELNCSIEWLETDPLDLVSGEDLSDVNFPLIACRSVEKFEILKPWGNLLLEK
	5505	GC_00000144	Bin_1	JFNG01	255	DETECTED		GO:0005575, GO:0005623, GO:0030288, GO:0030312, GO:0030313, GO:0031975, GO:0042597, GO:0044462, GO:0044464, GO:0071944		M							SSF56954	SSF56954			146891.A9601_01131	Outer membrane efflux protein			G3DSA:1.20.1600.10	G3DSA:1.20.1600.10	COG1538	Outer membrane protein TolC			PF02321	Outer membrane efflux protein							Coil	Coil	MLRRVINPFLLLPLTLSMNTFNVLSNETKNYIDNILEEKSNITFVDYQEIEKLVLNNQELKSLQNLVASSSFNLSSQIAKRYPSLDFQANGLPKYVAGKKYNSNSPTLKTSQFTANPSLNIKWDVIAPLIGSEIKIAKTNYKIAENNYEIKKKDLIQEARIRYHKYKKSYQDIQNKKFTLDLSITSLENAKAKLDTGIGTKFEVLEAEAQLSRDQQSLNEKKIEHEINKISLKEILNIKGDIETNKEQNLIGFWNHKLNKNINEGLDKNLSLKNIILQKSIKKSQAESFLAQNKPNIYISNSLSSTFSKGDSLVTNIDSEKSGSNYTNTISLNFVWSIFDGGQSKNSYKSKIADAESEKYAYENLKNVLTTSISKAYLNLKLNEEKIISSLKEIESSKE…
	4547	GC_00000277	Bin_1	JFNG01	256	DETECTED				C							SSF102114	SSF102114			167546.P9301_01131	oxidoreductase			G3DSA:2.30.42.10	G3DSA:2.30.42.10	COG1625	Fe-S oxidoreductase, related to NifB/MoaA family			PF04459	Protein of unknown function (DUF512)			TIGR03279	cyano_FeS_chp: putative radical SAM enzyme, TIGR03279 family					MWQEINYTKDPIDLLVPNITYKINPAEIESIEANSIAEEIGFESGDSIISINGKKPRDLIDYQILISEEILDISVLDKNHEIHNINIEKDQDVNLGINFKDALFDSIKQCNNRCPFCFIDQQPSGKRKSLYIKDDDYRLSFLYGSYLTLTNLKKEDWERIAMQKLSPLFISVHATDPAIREKLLKNKKAGVILDQISWFEKNSIQIHAQIVVCPDINDGDILEKSILELAEFYKKTSQTVLSVAIVPVGLTKFRPENDGLKSISPKYAKKTIKQVERIQASLQNTLGTRFCWLADEWYLIAGTNLPSYKTYENMPQESNGVGTIRNFLEALREKTQNLPQKVKKPKKVSWIVGKLVYEALIPTVKKLNLIYGLTINLYGLPSIYWGQDQVVTGLLTGED…
	1300	GC_00001318	Bin_1	JFNG01	257	NOT DETECTED																																			#NAME?
	3141	GC_00001162	Bin_1	JFNG01	258	DETECTED				S																					PF11318	Protein of unknown function (DUF3120)									MKELITKNLEVKDNFKYESHKVVDSYENSFLSNPISLRLWSSFFVILPIFVQAPWVRLEPISALCFTFVIVLVAIVLNQKGSNKWFIVSSLLLGISGSWLGGCLFWGWLSPFPILHIPVEAVVLPLALIGLGTNWKIGSSFYISSLFGTAVTDITIFLIGIMDQWRQVITADSENAPIILQKTSESLIQIKSLSIIVFVALILWFISKEILDSGTINTNSGKALLVSGYVIQTTLIVDGIFIVLAILQPTFSGLV
	1865	GC_00001042	Bin_1	JFNG01	259	DETECTED		GO:0000166, GO:0003674, GO:0003824, GO:0005488, GO:0005575, GO:0005622, GO:0005623, GO:0005737, GO:0006082, GO:0006139, GO:0006520, GO:0006531, GO:0006725, GO:0006732, GO:0006733, GO:0006734, GO:0006753, GO:0006793, GO:0006796, GO:0006807, GO:0008150, GO:0008152, GO:0008734, GO:0009058, GO:0009066, GO:0009108, GO:0009117, GO:0009165, GO:0009435, GO:0009987, GO:0015922, GO:0016491, GO:0016638, GO:…		H							SSF51905	SSF51905			146891.A9601_01161	L-aspartate oxidase			G3DSA:3.50.50.60	G3DSA:3.50.50.60	COG0029	Aspartate oxidase		map00250, map00760, map01100	PF00890	FAD binding domain			TIGR00551	nadB: L-aspartate oxidase					MLRPPFSQEPIPINNWDVIVIGAGAAGLMTCLELPSNLKVLLLNRNTSKVSSSRWAQGGIASVVRQDDSFDLHAEDTLKAGDGLCDFQAVEMLVKEAPGCVKRLQNLGMIFDQSSDQLATTLEAAHSRRRVLHVKDRTGRALVEVLEDHIENQKNILHCRGVRVTELLIENKECRGVQVLDGANLYWIKSRAVVLATGGGGHLFTNTTNPAQSSGEGIALAWKAGADIEDLEFVQFHPTALKFYGAPCFLISEALRGEGAILVDKNGESPVKNLENRDLATRDQVSRAIMKNMYENNVDHVGLDLRYIDPEKIVERFPTILSRCQDYGVNPLNEVIPVAPAAHYWMGGVKTDLNASSTRKGLYAVGEVASTGVHGANRLASNSLMECLVFARKMSSIVL…
	564	GC_00000965	Bin_1	JFNG01	260	DETECTED				S					PS51354	Glutaredoxin domain profile.	SSF52833	SSF52833			146891.A9601_01171	Vitamin K epoxide reductase			G3DSA:3.40.30.10	G3DSA:3.40.30.10	COG4243	Uncharacterized membrane protein			PF07884	Vitamin K epoxide reductase family	SM00756	SM00756			PS00194	Thioredoxin family active site.			MALKTLNIRNKKDLKWPKIIIAILSTIGIVDTGSITLKNWGLFTSLSCPGIQNGCETVLNSPWGTLFENNQVNIPLSLAGFITYLSILVVTIILSLNLISPKEKLNKFLWWLVFLISCASSTFSFLLINIMFFKIQAYCFFCILSAILSFSIFIISMIGAKFESREPMIFRGFIVAISVLLGGLIWSTNVDPSNAIDVVIPTENVSPIITTSSSPQKVKFAKFLSENNIVMYSAYWCPHCHDQKQLFGKEAVKELKVVECAKDGKDNEYELCQTKGISGFPSWEINGEIISGTRDLNELATKTDYQGDLNF
	5632	GC_00000723	Bin_1	JFNG01	261	DETECTED		GO:0003674, GO:0003824, GO:0005488, GO:0005575, GO:0005622, GO:0005623, GO:0005737, GO:0006464, GO:0008150, GO:0008152, GO:0009987, GO:0016740, GO:0016782, GO:0018193, GO:0018197, GO:0018198, GO:0018339, GO:0019538, GO:0035596, GO:0035599, GO:0036211, GO:0043170, GO:0043412, GO:0044237, GO:0044238, GO:0044260, GO:0044267, GO:0044424, GO:0044464, GO:0050497, GO:0051536, GO:0051539, GO:0051540, GO:…		J					PS50926	TRAM domain profile.	SSF102114	SSF102114			146891.A9601_01181	Catalyzes the methylthiolation of an aspartic acid residue of ribosomal protein S12 (By similarity)	MF_01865	Ribosomal protein S12 methylthiotransferase RimO [rimO].	G3DSA:3.80.30.20	G3DSA:3.80.30.20	COG0621	tRNA A37 methylthiotransferase MiaB			PF04055	Radical SAM superfamily	SM00729	Elongator protein 3, MiaB family, Radical SAM	TIGR01125	TIGR01125: ribosomal protein S12 methylthiotransferase RimO	PS01278	Methylthiotransferase radical SAM domain signature.			MKENSLDVKEKKLSKVAFSHVGCEKNLVDTEHMQGLLDKEGYEVDSNINDANVVVVNTCSFIETAREESIRKILEYTNQGKEVIVAGCMAQHFKDELIKEIPEIKGLVGTGDYQKIVKVLDRVEKGEIVQEVSKIPEFIADEEMPRFVDKNKFVAFLRIAEGCNYNCAFCIIPKLRGPQRSRTIESIVSEAKSLAKKGIQEIILISQITTNYGQDIYGKPSLAKLLNELSKVPIPWIRIHYAYPTGLTDEVIRAFKDSKNIVPYFDLPLQHSHPDVLKSMNRPWQASLNESILEKIREEIPSAVLRTSLIVGFPGEKKEHFEHLLEFLDRHKFDHVGVFIFSPEEGTTAFHLPNKVSPEVAEARKDNVISVQQNISKDKNQSYVGSKMEILVEKISENN…
	4088	GC_00000617	Bin_1	JFNG01	262	DETECTED				H	PIRSF037673	PIRSF037673									74546.PMT9312_0107	Inherit from COG: dihydropteroate synthase					COG0294	Dihydropteroate synthase			PF14251	Domain of unknown function (DUF4346)									MDSSKSFDEKINIDDNLSNRYIDLDPNGYFIIKVDLVENKIILEHYLNNINDDGYALDPETNEPIKCDSENKRVSNEVFEGISAKQLGILITEERNDLITRFDHALYLGRELQKAEECLYKKLPYIQD
	2619	GC_00000183	Bin_1	JFNG01	263	DETECTED				S							SSF55729	SSF55729							G3DSA:3.40.630.30	G3DSA:3.40.630.30	COG3146	Predicted N-acyltransferase			PF04339	Peptidogalycan biosysnthesis/recognition									MNQKIHKVEVKLSIKEISKEIWNELINEINNPFYEWTWLKNLEISKSVSRETGWQPLYFVAYKNEEILGIAPLFLKNHSYGEFIFDQSFARLAQELNLKYYPKLIGMSPYSPVNGYQFLYKKNEDKKEITNLLINHIESFAITNKILSCNFLYIDESWGDHLKSLGYHEWINSSSEWRSNGEKTFDDFLSRFNSNQRKNIKKERKSITKQDIKIKIFNDIDINQEMLEKMHDFYEQHCSRWGIWGSKYLTPTFFEKILDNKKNLLLFSASKIDSNDIFAMSMCVKNKKNLWGRYWGSQEEISNLHFELCYYQPIEWAIKNSIHLFDPGAGGKHKRRRGFFAKSTISLHKWFDKNMENIIYPWLNEVNKQTKMEIDIENKSIPFK
	141	GC_00000614	Bin_1	JFNG01	264	DETECTED				H							SSF53597	SSF53597			167546.P9301_01211	domain protein			G3DSA:3.40.430.10	G3DSA:3.40.430.10	COG1985	Pyrimidine reductase, riboflavin biosynthesis		map00740, map01100	PF01872	RibD C-terminal domain									MNIPRVIIVIASSLDGRIAFPGGGESHLGSEEDKKILNQHLSIVDATIFGLGTLIAHQSTYLIKNLNGNEEVTISKKQPISIVASNSKKFNSDWKYFRQPIRRWLISSSKVDNSSNNDFEKQLFFEDSWSKTLISLKKQGINDLALLGGAKLINSFIKEDLITDIKITIIPQIIGGKYTWIPPEKTNEIFNLKRLWEIKSVKNLMNNEIHIHYKKI
	5756	GC_00000097	Bin_1	JFNG01	265	DETECTED				H							SSF55620	SSF55620			74546.PMT9312_0110	synthase			G3DSA:3.30.479.10	G3DSA:3.30.479.10	COG0720	6-pyruvoyl-tetrahydropterin synthase		map00790, map01100	PF01242	6-pyruvoyl tetrahydropterin synthase									MTSTQSKPSHGKGRECVITRRACFSSSHRYWLPEKSPEENLSLFGKCSIAPGHGHNYELIVSMGGELDSDGMVLNLSDVKHSIKDKVTGQLDFHFLNDVWPEFNVNNQEGILPTTEALVKVIWSRLKDDLPLTSLRLYENPNLWADYFGKNMEAFLTVQTHFAAAHRLAKEEISFDENKKIYGKCARVNGHGHNYLVDITVKGDIDKRTGMVCDLSALHEIINDLVVEQLDHTFLNKDIEFFQNCVPTAENIALYISDILKNPIHELGATLHKIRLQESPNNAAEIYVDQKLTNSLKLKFENSLISQT
	4940	GC_00000166	Bin_1	JFNG01	266	DETECTED		GO:0000166, GO:0000287, GO:0001882, GO:0001883, GO:0003674, GO:0003824, GO:0004765, GO:0005488, GO:0005524, GO:0005575, GO:0005622, GO:0005623, GO:0005737, GO:0005829, GO:0006082, GO:0006793, GO:0006796, GO:0008150, GO:0008152, GO:0009058, GO:0009423, GO:0009987, GO:0016053, GO:0016301, GO:0016310, GO:0016740, GO:0016772, GO:0016773, GO:0017076, GO:0019632, GO:0019752, GO:0030554, GO:0032549, GO:…		E			PR01100	Shikimate kinase family signature			SSF52540	SSF52540			93060.P9215_01241	Catalyzes the specific phosphorylation of the 3-hydroxyl group of shikimic acid using ATP as a cosubstrate (By similarity)	MF_00109	Shikimate kinase [aroK].	G3DSA:3.40.50.300	G3DSA:3.40.50.300	COG0703	Shikimate kinase		map00400, map01100, map01110, map01230	PF01202	Shikimate kinase					PS01128	Shikimate kinase signature.			MEQSIIEKTVRAIKGRSIFLIGMMGSGKSQTGLKLAELLKYKYIDLDSLIEKLAKKSINQIFKDEGEDNFRELEANCLKETIKIPSLVISTGGGIVTKSENWGILRQGIIAWIDLDKDIAIERLKNEIENRPLLQGKNLNDLYMSIFQSRENLYSQADLKIQVK-KENIEEVAMKIINAIYKEIIS
	8862	GC_00001260	Bin_1	JFNG01	267	DETECTED				S																					PF12095	Protein of unknown function (DUF3571)									MSNPLIRASDHYVLLEPDSKEKIVSKQEAILWLKNWLSKTETQIIYQNIEDPDQEFFEELLESTYELEIKLGYVIKWFAVRIEPD
	5018	GC_00001365	Bin_1	JFNG01	268	DETECTED				S																															MKILLGLILCLVFQGIFLESSFALVDSNVREFLGNRVNQWPELYLPNFKLSDTSKDLIYPKWFEGNWLVTSQDIVNDSEEPVIYKVNFFKNDSDLIVGNRAKNSESIGKAIFGETLIKVVNDPQSINNQITYLKDDFYIDSRITGRNQIQDNDIFFADELVIQTAHKPGASRINQVETISKFQKCSEEILEVDNSIKPSICGVQYVASYGSKVGDPSIHAIKTNKYKLKFEFIES
	5890	GC_00000716	Bin_1	JFNG01	269	DETECTED				O					PS50405	Soluble glutathione S-transferase C-terminal domain profile.	SSF52833	SSF52833			167546.P9301_01261	Glutathione S-transferase			G3DSA:3.40.30.10	G3DSA:3.40.30.10	COG0625	Glutathione S-transferase		map00480, map00980, map00982, map05204	PF13417	Glutathione S-transferase, N-terminal domain									MITLYQFRHSAFCLKTRMALHAKKLQYRVEEVTPGIGQFEIFKLSGQKQVPIIVDSNDQVINDSSTICEYIDKKNENNPLFPDDPILFAQCKLIEDWADTTMATTCRKALIKSAIENPQLRTALLPDEIPSSVKSIVDKLPFENLSKISNVVLSSKDNLELQKLLETLSKSLINKKYLVGDSLSIADISIAAQLSLIKFPKSAGPILSGEGSQEYINNPYLENLFMWRNNLEEYLFSANSQ
	4619	GC_00001715	Bin_1	JFNG01	270	DETECTED				S																					PF05421	Protein of unknown function (DUF751)							Coil	Coil	#NAME?
	8067	GC_00001283	Bin_1	JFNG01	271	DETECTED		GO:0005575, GO:0005622, GO:0005623, GO:0005737, GO:0044424, GO:0044464		J							SSF89919	SSF89919	PD007327	FACTOR A RIBOSOME-BINDING PROCESSING RRNA 3D-STRUCTURE RIBOSOMAL-BINDING PRECURSOR A RBFA	146891.A9601_01301	Associates with free 30S ribosomal subunits (but not with 30S subunits that are part of 70S ribosomes or polysomes). Essential for efficient processing of 16S rRNA. May interact with the 5'-terminal helix region of 16S rRNA (By similarity)	MF_00003	Ribosome-binding factor A [rbfA].	G3DSA:3.30.300.20	G3DSA:3.30.300.20	COG0858	Ribosome-binding factor A			PF02033	Ribosome-binding factor A			TIGR00082	rbfA: ribosome-binding factor A	PS01319	Ribosome-binding factor A signature.	Coil	Coil	MPNNYRLAKVSSLLKKEITLILQNDLENDLIRDHFVNISKIDLSGDLQHCKIYITSTAQEKVRKQIVSNLNTAKSSIRHSLGKRIEMRKVPEIIFKDDVVLDKGLSVLKLLDELKNKNQNHNVEDKDAKS
	6022	GC_00001292	Bin_1	JFNG01	272	DETECTED				H							SSF69618	SSF69618			93060.P9215_01311	synthase (EC 4.2.1.75)			G3DSA:3.40.50.10090	G3DSA:3.40.50.10090	COG1587	Uroporphyrinogen-III synthase		map00860, map01100, map01110	PF02602	Uroporphyrinogen-III synthase HemD									MPKVDLPLDQRNIIITRSKEGILDIKKIFISKGANVYDLPAISITDPDDLNPLDEALNQINDFHWIIFSSSNGIKFVDKRLRYFNSSLKECSKKTKIAVVGEKTSKTLDDFGIKADFIPPEFVAESLIDNFPVSGYGLRVFVPRVQTGGRDLIADQFRKAGSRVFEVAAYETRCPKSIPEETIDIISNRKVDAIIFSSGKTVVNAAFLLEKKLGKQWLEYFEQIKLLTIGPQTTKICNKIFGRVDSQAQKYTFEGLLDVAINIFN
	1446	GC_00001267	Bin_1	JFNG01	273	DETECTED				S							SSF55961	SSF55961			93060.P9215_01321	Cyclase dehydrase			G3DSA:3.30.530.20	G3DSA:3.30.530.20	COG5637	Uncharacterized membrane protein			PF03364	Polyketide cyclase / dehydrase and lipid transport									MGTWLKHDVITVVNAPLENVWDTWSDLDSMSLWMSWIESVKTVDEETNTLPDLTEWTLAANGFRFKWKAQITERVEKSKLKWKSIGGLPTEGSVVFESKTDQITTVNLAITYELPKMIARFMEENILGKMVTNELQTNIDRFKDLVEKNYKKNFSN
	7791	GC_00001119	Bin_1	JFNG01	274	DETECTED				S							SSF51905	SSF51905			146891.A9601_01331	desaturase			G3DSA:3.40.50.720	G3DSA:3.40.50.720	COG3349	Uncharacterized conserved protein, contains NAD-binding domain and a Fe-S cluster		map00906, map01100, map01110	PF01593	Flavin containing amine oxidoreductase			TIGR02732	zeta_caro_desat: 9,9'-di-cis-zeta-carotene desaturase					MKIAIVGSGLAGLTAAVNLVDEGHEVEIYESRSFWGGKVGSWEDKDGNHIEMGLHVFFYNYANLFKLMKKVGALDNLLPKDHTHLFINNGGNLKSLDFRFPLGAPFNGLKAFFTTEQLTWVDKFRNALALGTSPIVRGLIDYEGAMKIIRDLDRISFREWFLNHGGSEKSLERMWDPIAYALGFINCKDISARCMLTIFMMFASKTEASKLNLLKGSPHKWLTQPIVDYIINKGAKIHLNHKVEEIIYEKESSSYSVNQLKISSPEGIKAVFADKFLAACDVPGIKKIIPKEWYQFKEFEGLKKLRAVAVATIQLRYDGWVTELQKDNTGNEPIGLDNLLYSADASFSCFADLALASPADYRKKDMGSLLQCVLTPGDRWMGRSTERITKEIDKEVRRL…
	114	GC_00000461	Bin_1	JFNG01	275	DETECTED		GO:0003674, GO:0005488, GO:0005506, GO:0005515, GO:0008150, GO:0008152, GO:0008198, GO:0009058, GO:0016043, GO:0016226, GO:0016530, GO:0022607, GO:0031163, GO:0034986, GO:0042802, GO:0043167, GO:0043169, GO:0044085, GO:0046872, GO:0046914, GO:0051536, GO:0051537, GO:0051540, GO:0071840		S							SSF89360	SSF89360			146891.A9601_01341	iron-sulfur cluster assembly			G3DSA:2.60.300.12	G3DSA:2.60.300.12	COG0316	Fe-S cluster assembly iron-binding protein IscA			PF01521	Iron-sulphur cluster biosynthesis			TIGR00049	TIGR00049: iron-sulfur cluster assembly accessory protein	PS01152	Hypothetical hesB/yadR/yfhF family signature.			MENVEVKQEIKNSDDGKGILITNDAIEQISNLLKGQSDKKALRVGVRSGGCSGMSYTMDFIGTDEINPDDKVYDYSLKADQSFQVVCDPKSLLYIYGMQLDFSKELIGGGFNFVNPNASQTCGCGSSFAV
	5449	GC_00000455	Bin_1	JFNG01	276	DETECTED				S							SSF48452	SSF48452			146891.A9601_01351	TPR-repeat protein			G3DSA:1.25.40.10	G3DSA:1.25.40.10															#NAME?
	3464	GC_00000279	Bin_1	JFNG01	277	DETECTED				S							SSF53756	SSF53756			167546.P9301_01351	Inherit from COG: Transfers the gamma-phosphate of ATP to the 4'-position of a tetraacyldisaccharide 1-phosphate intermediate (termed DS-1- P) to form tetraacyldisaccharide 1,4'-bis-phosphate (lipid IVA) (By similarity)					COG4370	Uncharacterized protein							TIGR03492	TIGR03492: conserved hypothetical protein					MFKILILSNGHGEDLSGSLIAKQFVKSGYSVHALPIVGMGNHYEKEKIKIIGKTKEFRTGGIGYNSFKGRLTEILGGEIFYLLKRLYLTFKIRKKYDHFVVVGDIVPVFFAWVCKKNFFTYLVAYSSHYEGKLKLPWPSKFFLLSQKAKKIYTRDSLTANDLTLQLKKKVSFLGNPFMDKFFPRNKEFNKDEFSIGLFPGSRFPEISDNFVLILKVLEALSDLRYFQKIQFNFAIVNALSSSKIKEVFQKRGWLKIENIKDNNLLKFQYKFLKVNIYWNNFDKILLKSRCCISMAGTAAEQAIGLGKPVIQIEGKGPQFTKTFAEAQRRLLGKYVFCATKYKDKNDQINQTIKLIIKIIYLIQLNEKFMISCNENAKKRLGENKACLKMVDDMNIVIKND
	1823	GC_00000390	Bin_1	JFNG01	278	DETECTED				S																															MTKENNQNKLKQIIDNLLLINLFTVIFFAIFFIFAIIMQFNGIFIFINFIQIVWNPLVVPLITILIIGALVNGINSWWRRKLLSQEEDI
	7571	GC_00000592	Bin_1	JFNG01	279	DETECTED				M							SSF51735	SSF51735			93060.P9215_01381	epimerase			G3DSA:3.40.50.720	G3DSA:3.40.50.720	COG1090	NAD dependent epimerase/dehydratase family enzyme			PF08338	Domain of unknown function (DUF1731)			TIGR01777	yfcH: TIGR01777 family protein					MRLLLLGCTGFVGKELVPTLLNENHEIYIVSRKPISKLKLDLDFNKFKFFQIDLSKEKNWNNENLLNILRETDGIINLMGEPIAEKKWTSEQKQEIENSRINTTKFMMKTLKNLKINPKVIINGSAIGYYGTSLSSEFTENSPGGKDFLSNLCKKWEAVAAEKPFFSRLVIFRIGIVLEKDGGALGKMLPIFKVGLGGPIGDGKQWMSWIHRTDLCALIIQALVDKKYSGVFNAVAPNPVLMREFSQTLGKCLNRPNLLPVPGAVLKILLGDGAKVVLEGQKVISSKIKNYNFKYPLLEKAIYASTKN
	7546	GC_00001062	Bin_1	JFNG01	280	DETECTED		GO:0005575, GO:0005622, GO:0005623, GO:0005886, GO:0009579, GO:0016020, GO:0034357, GO:0042651, GO:0044424, GO:0044436, GO:0044464, GO:0071944		C											93060.P9215_01391	electron donor, via FMN and iron-sulfur (Fe-S) centers, to quinones in the respiratory and or the photosynthetic chain. The immediate electron acceptor for the enzyme in this species is believed to be plastoquinone. Couples the redox reaction to proton translocation, and thus conserves the redox energy in a proton gradient. Cyanobacterial NDH-1 also plays a role in inorganic carbon- concentration…	MF_01354	NAD(P)H-quinone oxidoreductase subunit O [ndhO].							PF11910	Cyanobacterial and plant NDH-1 subunit O									#NAME?
	1121	GC_00000133	Bin_1	JFNG01	281	DETECTED				O			PR00625	DnaJ domain signature	PS50076	dnaJ domain profile.	SSF46565	SSF46565			93060.P9215_01401	Heat shock protein			G3DSA:1.10.287.110	G3DSA:1.10.287.110					PF00226	DnaJ domain	SM00271	DnaJ molecular chaperone homology domain							MEKNLYEELGLKQNATRSEIKSSYRSLVKQHHPDAGGEKERFLAIQNAWETLNDPIKKKQYDSSFSFSSSSFDSLNENWEEKFNSKKHNSSIKDKEVETWIKEIYSPINRLISQIIKPLNSEIKELSADPYDDELMENFCSYIILSQKKIEKVEKIYNKKIVPKSISALGLDLYHCFSQVKDALSEFDRYTQGYVDNYLFDGKEMIKEAKRIQSKMSIEKKNKNF
	614	GC_00000065	Bin_1	JFNG01	282	DETECTED		GO:0000096, GO:0000097, GO:0003674, GO:0003824, GO:0004124, GO:0005488, GO:0005575, GO:0005576, GO:0005622, GO:0005623, GO:0005737, GO:0005829, GO:0006082, GO:0006520, GO:0006534, GO:0006535, GO:0006563, GO:0006790, GO:0006807, GO:0008150, GO:0008152, GO:0008652, GO:0009058, GO:0009069, GO:0009070, GO:0009987, GO:0016053, GO:0016829, GO:0016835, GO:0019344, GO:0019752, GO:0030170, GO:0043167, GO:…		E							SSF53686	SSF53686			146891.A9601_01411	Cysteine synthase			G3DSA:3.40.50.1100	G3DSA:3.40.50.1100	COG0031	Cysteine synthase		map00270, map00920, map01100, map01120, map01230	PF00291	Pyridoxal-phosphate dependent enzyme			TIGR01139	cysK: cysteine synthase A	PS00901	Cysteine synthase/cystathionine beta-synthase P-phosphate attachment site.			MNEGDFILDFKNNFMEIANDITSLVGNTPLVKLNRIRKYFDCYPEIIAKLESFNPSASVKDRIAYSMLCKAEEEGLITPDETTLIEATSGNTGIALAMVAAAKGYKLILTMPDTMSIERRAMLRAYGAELQLTPGKDGMKGALDLANELSSTIANSYQFNQFENFANPDIHERTTAQEIWSQSNNNLDGLVTGVGTGGTITGCARFLKKVNPNCKIYAVEPKKSAVISGEKAGSHSIQGIGAGFVPKVLNTKLIDEIIKIDDDEAFYYGRLLARLEGLLSGISSGAALAATIKIGKRKELMNKRLIVILPSFGERYLSTAMFESNTSIQARKDGYL
	7515	GC_00000532	Bin_1	JFNG01	283	NOT DETECTED				S											93060.P9215_01421	UPF0367 protein	MF_01360	UPF0367 protein <locus_tag>.																	MIMYSLELSLRYSPFPISIQKKEFDDVKGIYDEIKSSMNETFESSNLIELKCDKVQDKLIAVRAKEIISVQIYEKSSVAGGAKRPGFSLNID
	5339	GC_00000151	Bin_1	JFNG01	284	DETECTED				P					PS50893	ATP-binding cassette, ABC transporter-type domain profile.	SSF52540	SSF52540			167546.P9301_01421	ABC transporter			G3DSA:3.40.50.300	G3DSA:3.40.50.300	COG1122	Energy-coupling factor transporter ATP-binding protein EcfA2		map02010	PF00005	ABC transporter	SM00382	ATPases associated with a variety of cellular activities			PS00211	ABC transporters family signature.			--MRDFLENEIPHINF--KDVSFLYPGEKENLIFECNLSIKKHGFWMVVGKNGS--GKSTLLKLINGIIKPKNGVIYSNANIGMVFQNPDHQILMPNCRSELLININQNISQNEINKKIEYVLDQVGMAGFEKRPVHTLSGGQKQRLTIASALISNRNFILLDEPTALLDQTSQLKVLQTIKNLTSDHKKPLSALWITHRYEELTYADAVAELKNGILSGWQEPSKFQYN-
	6524	GC_00002057	Bin_1	JFNG01	285	NOT DETECTED				L					PS51736	Resolvase/invertase-type recombinase catalytic domain profile.	SSF53041	SSF53041			500635.MITSMUL_04120	resolvase			G3DSA:3.40.50.1390	G3DSA:3.40.50.1390	COG1961	Site-specific DNA recombinase related to the DNA invertase Pin			PF00239	Resolvase, N terminal domain	SM00857	Resolvase, N terminal domain							MTVYGYWRISCGSTQEETRQILALKNAGATVIRGDKITGTSNFNERAELTKLLEEMESGSTLILSELSRLSRSFVGMVNEVSKLLERNIQLVTLDKRLDTRTMPKEITMLLVSILGYAASQELSAIKSRCEEGRRVAQSRGVKFGRKRKYDEFQVAEVMKKKSEGVGLGTIAKSVGMSRSMVQRIVRQQVAVGIQ
	7793	GC_00002265	Bin_1	JFNG01	286	NOT DETECTED																																			MKRIIDDEAKTIWYYSESGFPTYMAISHYRKRSPSYEHCIASKQTWQTLCETNKPMKL
	8538	GC_00002405	Bin_1	JFNG01	287	NOT DETECTED																																			MKIIAKVRYVDHQKRSHTVEIESDNADRRHLEDLVKARYPAEKVYFQSVRQK
	8020	GC_00002047	Bin_1	JFNG01	288	NOT DETECTED																																			MNFEPPLKQQRHVTYKRREAKILRPIEETLMDELGLTYSDLVKKGVRNLWSQRQQEKALAL
	7929	GC_00002113	Bin_1	JFNG01	289	NOT DETECTED																																			MESETTRESISIMSSHKLPSISSTHYELLKMLMERRGVKGETEILEELIMEATSSPVKTYGRFR
	7457	GC_00002511	Bin_1	JFNG01	290	NOT DETECTED																																			MANKTKQMDITLKEDEWKKLHTQCNKSSCRKFQKDPSEIFRLGVQQVLKNY
	255	GC_00002209	Bin_1	JFNG01	291	NOT DETECTED																																			MDLRQQQMQKDASRNHSLIGKEFYVTCPDRPDYFRTVYMKKNPFTGQVQSMLSNPVCGVPPTGIPEMPANLLSRLNCMNTAMPHTI
	1818	GC_00001978	Bin_1	JFNG01	292	NOT DETECTED																																	Coil	Coil	MKRLRDSIPVRAKFEQLQDALDDYFFRLKLDAQVKRLTKELRRIEELHGIKRYQTLDSNMTSPINDQVSTRGG
	8175	GC_00001888	Bin_1	JFNG01	293	NOT DETECTED																																			MSERKISGTLELTCEQWAIMLLMIRKEIPQLPQILWSSAEMVECAIEKAMDDSVQDVLQEDLKNIISDGDSDAKV
	7595	GC_00002196	Bin_1	JFNG01	294	NOT DETECTED																																			MPKFKGKNVQYALVTFHVTHCDPCWHDDETGELVGSSHTKQLHKLYPYLKNKDGNFRRTGNFVYPDHLNPCHYGMSFAFENATPDPHTRINSDEQIAYIKSYLPTSLWQLEAGKGYLHIDNLLPSIRKAGIDLYFGNSYPKISRKPILVKWNQIYDAVKPDDPYWNCLVRKRFDFLALEASNMEESDET
	8437	GC_00002306	Bin_1	JFNG01	295	NOT DETECTED																																			MKLNPDTLSILKEWKEDETINHSSDDFIQIEPKDWETVEYFATKKYATKSSKDWFYQLDKPRFRADGTHETWKDFYQNHFFGLVGQLVSHCCFRRKDVWSGGIRQEIKDAVHTAFNYQFFEDFRDLVFMPFVERHRAWSHLEHKAKPEYEEKTQILKDWDFSTLERFLGESL
	8230	GC_00002439	Bin_1	JFNG01	296	NOT DETECTED																																			MKIDYSIDRARDTAPLLALKRKRFKILEMLMEAREFIIVKPTHYQEVHDKWHPLLLKVEEQIKQEVLKNQ
	7336	GC_00002448	Bin_1	JFNG01	297	NOT DETECTED																																			MYSKDPNIDKEAIKVRAALVEFHARNPKKANPYEGMCYCASVCLKKLVGRAVILWKVKDHNGVWHWWCETPDGEVIDLTKEQYELNHNPVPSTGRASKLKEQGRIMSFKSYQKKIDTLMQIIEEKY
	7911	GC_00001920	Bin_1	JFNG01	298	NOT DETECTED																																			MPINPNYIKVDSDEIDTRKRYPVVLDIADSIYIANYFLSYFAPSGNASELMRFQKIEDLKKKNLYEGYEHPFHKEGVFDKDNFGINIYFVGTPNDARTKKPDYLKLLDLTSSHINFGGWQCCDFVCTLSGLHNSINFIKEETDVPTDEFILGWIRCDSGVLNNKPLQEYLGQNRLMPDFVNAHIMNAKVLVPTAQFGRMRGGKLLALLSQSNEIRDFFNEKYKRNIVLWYSMSLYGTTKSSCQYDQLDRYIKFIGNTESKELMRMKNPHFDRIKEWLDRRGIPKTNFSFRGSSKADRSFRELVSFVKHCLWYNQKDPTVKELKIQFEKKLVDLLDITEQKRCYVSTYGLEYWDDNLINPERVVLESNNLENLFEYWKTKVFKKHDWGMRKYKKLLNNQI…
	2010	GC_00001926	Bin_1	JFNG01	299	NOT DETECTED																																			MAKKPNERHLTFCIDEVVRDQFQQLCKTLDVSAGSVMRSWVETALEKGTVDFSGSPESSKNSLSNSDKKVIQNILSRLDEVERNTAYLNENQMEFIKDEVLGDEMGTLRNRIGVVEKEINQLGGNISRN
	3041	GC_00001906	Bin_1	JFNG01	300	NOT DETECTED				L							SSF56349	SSF56349			84588.SYNW2099	Integrase			G3DSA:1.10.150.130	G3DSA:1.10.150.130	COG0582	Integrase			PF14659	Phage integrase, N-terminal SAM-like domain									MDHSGGKEMNFMNTDSKIKKLKTQISKQKKWYPVQPHSSLYLVTQGNSFRFIGKWKVKPYDLTIGSYTKGMKVGDAIQEWEKLKGWAEEKGLHPNKFYEPQVKTSRTFHEVANEYMEEVYKPKNKERTYQDRRNKLNQMLNYIDEHFLISDLELKSGGRETIKNMLINLFQKNDANYQLIRCRQLLTAIFNYAEDEHYISEHQNPVARKFAWEGDKHIKRDPKQKSFAHTVKGKSWGLLPEFLQSVNQNKCNASKITDLATKAHLLMCIRTGVISRLQWNWYNSDLDQWEIPSQTAGLKRKKKDLENDHIIPSTPVINKLMKEVREITGWQKYCFYSFNGKSDPHLGEETINDHFRNLGWKGKQSAHGWRDVITTTALEKSNFEYDIIDRQLGRMNHKQ…
	2191	GC_00002239	Bin_1	JFNG01	301	NOT DETECTED																																			MNNSTDIQHGFQRGFYDLEETCDLLRTSVSTYKRHEKKGLAPQGKQLFGRKKLYAIGEVNLFAEGKWKPEEWITQEVKK
	2646	GC_00002079	Bin_1	JFNG01	302	NOT DETECTED																																			MKNIKNQVWTSRNLKKTSKKTNKGAIKISYRVLTSPSIIT
	8269	GC_00002107	Bin_1	JFNG01	303	NOT DETECTED				V			PR00507	N12 class N6 adenine-specific DNA methyltransferase signature			SSF53335	SSF53335			768670.Calni_1405	N-6 DNA Methylase			G3DSA:3.40.50.150	G3DSA:3.40.50.150	COG0286, COG0732	Type I restriction-modification system, DNA methylase subunit; Restriction endonuclease S subunit			PF02384	N-6 DNA Methylase					PS00092	N-6 Adenine-specific DNA methylases signature.			MLDSVTKKRIDDLRNILVGKIPSPQSQVEQITTGLIYKFMHDMDNEAIEMGGVPSFFVDEYEKYSWKHLFNTKLGGVEKVKLYSEAIENLYNNPSAPDIFREIFKNSFLPFKDPTTLNMFLKEINEFHYSNSEQLGDAYEYLLSFMGSQGDAGQFRTPRHIIDFIIQIVNPQKHETILDPACGTSGFLISSYKHILTQNTQTRMGDQLNAAERKEIGANLVGYDIDPAMSRISLVNMYLHNFASPNISEYDTLSSEDKWNEYFDVILANPPFFSPSGGIKPHSRFGIKSNRAEVLFVDYIIEHLKPTGRAGIIVPEGIIFQMGNAHKALRKKLIENSLIGVISLPSGVFQPYSGVKTSILILDKELNKKFNNIFFAKLENDGFSLGAQRNIISDNDIPK…
	778	GC_00001864	Bin_1	JFNG01	304	NOT DETECTED				V					PS51194	Superfamilies 1 and 2 helicase C-terminal domain profile.	SSF52540	SSF52540			768670.Calni_1406	type iii restriction protein res subunit			G3DSA:3.40.50.300	G3DSA:3.40.50.300	COG4096	Type I site-specific restriction endonuclease, part of a restriction-modification system			PF04851	Type III restriction enzyme, res subunit	SM00487	DEAD-like helicases superfamily							MSEANSRIIIDNLLRESGWNLPGNKGIINVDTEIRNKSGRADYVLFDSSTFPLCVIEAKNELTPPLNGKEQARDYAKSLNCRFIILSNGFQHYFWDIEQGNPTIVNSFFSQEQLELRKSNFNPPRNESEEIDNFYIAKTQLPNFAQNPDYIDEKRREVFLKKNKLRILRDYQLRAVKAVQKNIREGKDRFLLEMATGTGKTLTSSAIIKMFLRLYSVKRILFLVDRIELETQAQKEFDDVLKNDFNSVIWKENQSDWKRAEIVISTVQSFVNKNKYRKVFRPDDFDLVISDEAHRSLGARSRKVFEYFIGFKLGLTATPKDYLKSVDIEEVEINNPKQLERRLMLDTYTIFGCDSGEPTFRYSLEDGVKDGYLLNPKVIDARTEITTQLLSEEGYILNI…
	2466	GC_00001904	Bin_1	JFNG01	305	NOT DETECTED																																			MIDTDLMQPAKTPDELAEMYPDLEPWQRDELEVWHRGWISKIMTGDASSEEYNAAIPPHPDPYHPED
	4368	GC_00000139	Bin_1	JFNG01	306	DETECTED																																	Coil	Coil	MKKKSIIYSDLSKKQLETLKELYIQKKVESMSHQELKEYVLEIISHQINDTIGKEEEMEAWREMSDFFGEQFEINILEIQTKYIDDKNVIETEIDSQKQRIELLERNNLDQEKKDMWDD
	3672	GC_00000595	Bin_1	JFNG01	307	DETECTED				T					PS51755	OmpR/PhoB-type DNA-binding domain profile.	SSF52172	SSF52172			167546.P9301_01471	Two component transcriptional regulator, winged helix family			G3DSA:3.40.50.2300	G3DSA:3.40.50.2300	COG0745	DNA-binding response regulator, OmpR family, contains REC and winged-helix (wHTH) domain		map02020	PF00072	Response regulator receiver domain	SM00448	cheY-homologous receiver domain							MKISILLIEDDRDMRDLVARHLEHSGFDVQKAEDGIKGQALALQYSPDLILLDLMLPSVDGLTLCQRLRRDERTSNIPILMITALGGLKDKVTGFNSGADDYITKPFDLEELYVRIKALLRRTNRAQLNSTNQQEILNYGPLTLVPERFEAIWFESPVRLTHLEFELLHCLLQRHGQTVSPALILKEVWGYEPDDDIETIRVHIRHLRTKLEPDPRKPVYIKTVYGAGYCLELPIGSQVEVARQEFIQARNPDLINSAVD
	5396	GC_00000137	Bin_1	JFNG01	308	DETECTED				L							SSF52540	SSF52540			167546.P9301_01481	DNA polymerase III subunit delta'			G3DSA:3.40.50.300	G3DSA:3.40.50.300	COG0470	DNA polymerase III, delta prime subunit		map00230, map00240, map01100, map03030, map03430, map03440	PF13177	DNA polymerase III, delta subunit									MIELKKNNFFLNEEVNTFLKNIIKNKSLANGYIFYGAEGLGKKQTALQFIKEIFKQSSPSENVEERITNNNHPDFLIIEPNSLTSTKSTGSSDLEKTVKSGSEIIKIAQIRNIKTFLGQKSINSEKKIVLIIDAHLLNEAASNCLLKTLEEPSNGIFILLTSKLNLLLDTIISRCQIVRFRSFSSKKIKSILKEYLNTSKSTKINTNLKFEDLINSANGSPNQLLKNIEIWNDFSDEIISKLDSPIKNSLEILEISKTISEKLEIFQQICLVNLIQTIWWRKTKNIALVKKLENLKYFLRKNIQPRLAWEIAFLKISMEDI
	3611	GC_00000712	Bin_1	JFNG01	309	DETECTED		GO:0003674, GO:0003824, GO:0004798, GO:0005575, GO:0005622, GO:0005623, GO:0005737, GO:0006139, GO:0006220, GO:0006221, GO:0006233, GO:0006235, GO:0006725, GO:0006753, GO:0006793, GO:0006796, GO:0006807, GO:0008150, GO:0008152, GO:0009058, GO:0009117, GO:0009132, GO:0009133, GO:0009138, GO:0009139, GO:0009141, GO:0009142, GO:0009147, GO:0009148, GO:0009165, GO:0009186, GO:0009189, GO:0009196, GO:…		F							SSF52540	SSF52540			146891.A9601_01471	Phosphorylation of dTMP to form dTDP in both de novo and salvage pathways of dTTP synthesis (By similarity)	MF_00165	Thymidylate kinase [tmk].	G3DSA:3.40.50.300	G3DSA:3.40.50.300	COG0125	Thymidylate kinase		map00240, map01100	PF02223	Thymidylate kinase			TIGR00041	DTMP_kinase: dTMP kinase	PS01331	Thymidylate kinase signature.			MKGKFIVIEGIDGCGKTTQIDELSKWLPNSGLIKKGSKLITTREPGGSLLGKKLRGLILENNENNKPSSLAELLLYSADRAEHVSKIISPALNNNDWVISDRFSDSTLAYQGYGRNINLEIIKNIESIVCQGASPDLTFFLEISPEESIFRRKNEIPDRIESEGIRFLEKVNEGFKLIAKQKNWKVISASQNIQTISNQIKETLLNNFSNNK
	2629	GC_00000048	Bin_1	JFNG01	310	DETECTED		GO:0000041, GO:0005575, GO:0005623, GO:0005886, GO:0006810, GO:0006811, GO:0006812, GO:0006825, GO:0008150, GO:0009987, GO:0015677, GO:0016020, GO:0030001, GO:0034220, GO:0035434, GO:0044464, GO:0044699, GO:0044763, GO:0044765, GO:0051179, GO:0051234, GO:0055085, GO:0071944		P			PR00119	P-type cation-transporting ATPase superfamily signature	PS50846	Heavy-metal-associated domain profile.	SSF56784	SSF56784			167546.P9301_01501	p-type ATPase			G3DSA:3.40.50.1000	G3DSA:3.40.50.1000	COG2217	Cation transport ATPase			PF00122	E1-E2 ATPase			TIGR01525	ATPase-IB_hvy: heavy metal translocating P-type ATPase	PS01047	Heavy-metal-associated domain.	Coil	Coil	MESIQLNISGMKCGGCVSTVEKILNNSDGIENVSVNLLTESAYFEITQKHIELEAVLKNLKENGFPSKIYINDFSKKINKAELEKKKKWNNQWKKLTFALLLLLFSGLGHLAEGRYINFPILGNIFFHASLATLALVFPGRGIIINGFKSFIKNRPDMDSLVALGVTSAYITSLLSLIFPATGFPCFFNEPVMLLGFILIGRFLEERARYQTGSSIGELLDLQPEMANIYTEDNQIKSIRVNTLRPNQEIQVLAGDRVPADCIVTQGNSYIDVSHITGESKPIEVKEGENLSSGSLNLNSTLRLKVQNVGGDSSLAKLVNLIESVNARKPRIQRIADEIAGKFTYFVLIFATLTFFFWWKGARNIWPDLLSHNYQLITHSSHTLHSSLGSNAENFLSLA…
	6579	GC_00000485	Bin_1	JFNG01	311	DETECTED		GO:0005575, GO:0005622, GO:0005623, GO:0009579, GO:0016020, GO:0034357, GO:0042651, GO:0044424, GO:0044436, GO:0044464		O					PS50005	TPR repeat profile.	SSF48452	SSF48452			93060.P9215_01491	Seems to be required for the assembly of the photosystem I complex (By similarity)	MF_00439	Photosystem I assembly protein Ycf3 [ycf3].	G3DSA:1.25.40.10	G3DSA:1.25.40.10					PF13414	TPR repeat	SM00028	Tetratricopeptide repeats							#NAME?
	7402	GC_00000158	Bin_1	JFNG01	312	DETECTED		GO:0000725, GO:0005575, GO:0005622, GO:0005623, GO:0005737, GO:0005829, GO:0006139, GO:0006259, GO:0006281, GO:0006310, GO:0006725, GO:0006807, GO:0006950, GO:0006974, GO:0008150, GO:0008152, GO:0009295, GO:0009987, GO:0033554, GO:0034641, GO:0043170, GO:0044237, GO:0044238, GO:0044260, GO:0044424, GO:0044444, GO:0044464, GO:0044699, GO:0044763, GO:0046483, GO:0050896, GO:0051716, GO:0071704, GO:…		O			PR01874	DNA repair protein radA signature	PS50162	RecA family profile 1.	SSF52540	SSF52540			146891.A9601_01501	May play a role in the repair of endogenous alkylation damage (By similarity)			G3DSA:3.40.50.300	G3DSA:3.40.50.300	COG1066	Predicted ATP-dependent serine protease			PF13481	AAA domain	SM00382	ATPases associated with a variety of cellular activities	TIGR00416	sms: DNA repair protein RadA					MSSKLSTFICQNCGSETSQYFGKCLNCNSWNSIVEEIKSKSSKYQEIKDIKNSKKSIPFNEISSKKISRFTSGFKEFDRVLGGGIVPGSVVLLGGEPGIGKSTIVLQSAGKISLKEKVLYITAEESLEQVKIRWERLNQNSFDLKIFAETNLSLIIEEIKRVNPSFAIIDSIQAIHNHEMQSSPGSVSQVRACSSELQNLAKDNNIALLIIGHVTKDGALAGPKTLEHLVDTVINFEGDNISSHRLLRSIKNRFGSTFEIGIFEMLEEGLREIKNPSSIFTNKENISGVTTTITNEGTRPLAVDIQALVNKTFYSNPRRTTTGISINRLHQILAVIEKHVGIKLSEFDCYVATGGGFEINDPSSDLGVAISILSSLKNIPPLASSSFIGELGLSGQVRK…
	4536	GC_00000134	Bin_1	JFNG01	313	DETECTED				T					PS51755	OmpR/PhoB-type DNA-binding domain profile.	SSF52172	SSF52172			146891.A9601_01511	Two component transcriptional regulator, winged helix family			G3DSA:3.40.50.2300	G3DSA:3.40.50.2300	COG0745	DNA-binding response regulator, OmpR family, contains REC and winged-helix (wHTH) domain		map02020	PF00072	Response regulator receiver domain	SM00448	cheY-homologous receiver domain							MALSSQTKETILVADDEASIRRILETRLSMIGYKVVTASDGKEALKLFKDYEPDLVVLDVMMPKLDGYGVCQELRKDSDVPIVMLTALGD--VADRITGLELGADDYVVKPFSPKELEARIRCVLRRIDKEQIPGMPNSGLILVTDIKIDTNRRQVFKSDERIRLTGMEFSLLELLVSRSGEPFSRGEILKEVWGYTPERHVDTRVVDVHISRLRSKLEADPANPELILTARGTGYLFQRIVDIAPFDGK
	5773	GC_00000786	Bin_1	JFNG01	314	DETECTED		GO:0003674, GO:0003824, GO:0005575, GO:0005622, GO:0005623, GO:0005737, GO:0006629, GO:0006644, GO:0006793, GO:0006796, GO:0008150, GO:0008152, GO:0008610, GO:0008654, GO:0009058, GO:0009987, GO:0019637, GO:0044237, GO:0044238, GO:0044249, GO:0044255, GO:0044424, GO:0044464, GO:0044710, GO:0071704, GO:0090407, GO:1901576		I							SSF53659	SSF53659			167546.P9301_01541	Catalyzes the reversible formation of acyl-phosphate (acyl-PO(4)) from acyl- acyl-carrier-protein (acyl-ACP). This enzyme utilizes acyl-ACP as fatty acyl donor, but not acyl-CoA (By similarity)	MF_00019	Phosphate acyltransferase [plsX].	G3DSA:3.40.718.10	G3DSA:3.40.718.10	COG0416	Fatty acid/phospholipid biosynthesis enzyme		map00561, map00564, map01100	PF02504	Fatty acid synthesis protein			TIGR00182	plsX: fatty acid/phospholipid synthesis protein PlsX					MGKETAQKINKSRAIRRLVIWYKRNSAVTSIVDTAASSAATASNVAGNVVSGAGSVVTT----ASNVAGNVAGNVVSSAESVVNTASSVVSNASSIAKNTLQPLVFDPLKRLQNSDNILDKVEDIQSKRIWIAVDGMGGDYAPGPILEGCLEAISRFPINIKFVGKIEKVKDAAEKTGSAELLENEINNNRIELIDSGEPIGMNEEATAVRKRKNASINVAMDLVRNNKAEAVYSAGNSGAMMASAIFRIGRLKGIDRPAIGALFPTRDQTRPVLVLDVGANTDCKPSYLHQFALLGNIYAKDVLQVKKPRIGLLNIGEEECKGNELSLKTFELLSSEKSFDFAGNCEGRDVLSGSFDVVVCDGFTGNILLKFLESVGGVLLDILRSELPRGRRGKVGS…
	7944	GC_00000126	Bin_1	JFNG01	315	DETECTED		GO:0005575, GO:0005622, GO:0005623, GO:0005737, GO:0044424, GO:0044464		I							SSF53901	SSF53901			146891.A9601_01531	Catalyzes the condensation reaction of fatty acid synthesis by the addition to an acyl acceptor of two carbons from malonyl-ACP. Catalyzes the first condensation reaction which initiates fatty acid synthesis and may therefore play a role in governing the total rate of fatty acid production. Possesses both acetoacetyl-ACP synthase and acetyl transacylase activities. Its substrate specificity deter…	MF_01815	3-oxoacyl-[acyl-carrier-protein] synthase 3 [fabH].	G3DSA:3.40.47.10	G3DSA:3.40.47.10	COG0332	3-oxoacyl-[acyl-carrier-protein] synthase III		map00061, map01100	PF08541	3-Oxoacyl-[acyl-carrier-protein (ACP)] synthase III C terminal			TIGR00747	fabH: 3-oxoacyl-[acyl-carrier-protein] synthase III					MEGINFNQIGVSFKGSGSYVPDQILTNQKISQKVDTSNEWIQSRTGISERRISSVEDNVTEMGYKAALTAIEMANWDIKTIDLIVLATSTPHDLFGSAPSIQAKLGAANAVAFDLTAACSGFLFALITASQFLKGGSFKRAIVIGADQLSSFVDWNDRRSCILFGDGAGALAIEATNEFDNFIGFDMRTDGGRGSFLNLPSKNNKDSIVDEIDFLSGGFSPIQMNGQEVYKFAVKEVPLILQKLLKKMNYNSNQVDWLLLHQANQRILDSVGERLKIPREKILSNLEKYGNTSAATIPLMMDEAVRDYRIKQNDIIATSGFGAGLSWGAALIKWG
	2827	GC_00000178	Bin_1	JFNG01	316	DETECTED		GO:0005575, GO:0005622, GO:0005623, GO:0005737, GO:0044424, GO:0044464		I	PIRSF000446	PIRSF000446					SSF52151	SSF52151			146891.A9601_01541	malonyl CoA-acyl carrier protein transacylase			G3DSA:3.40.366.10	G3DSA:3.40.366.10	COG0331	Malonyl CoA-acyl carrier protein transacylase		map00061, map01100	PF00698	Acyl transferase domain	SM00827	Acyl transferase domain in polyketide synthase (PKS) enzymes.	TIGR00128	fabD: malonyl CoA-acyl carrier protein transacylase					MTVAWVFPGQGSQKIGMTKQIENLPITKERFGYASEIFERNLFEICELNTEPTNPLLDLNNTRNTQICLFLVESILLDALKENGFKPTYVAGHSLGEITALYCADVFSFEDCVSLIKERSQLMVNAGKGSMAAVIGFDRNQLDLLVQKIDDIVIANDNSSSQVVLSGSTEALDNLSREIACKRFLKLNVSGAFHSPFMNEPSSKFCEYLKKIKFNNPSFPVISNYEPSLCSDPNELKIRLEKQMCNGVRWRETMDLMAKDSDLHIVEIGPSNVLSGLGKRHLKDVKISQVSSSDQISY
	2396	GC_00000152	Bin_1	JFNG01	317	DETECTED		GO:0003674, GO:0003824, GO:0008150, GO:0008152, GO:0008374, GO:0016411, GO:0016740, GO:0016746, GO:0016747, GO:0042171, GO:0071617		I							SSF69593	SSF69593			146891.A9601_01551	Acyl-transferase			G3DSA:3.40.1130.10	G3DSA:3.40.1130.10	COG0204	1-acyl-sn-glycerol-3-phosphate acyltransferase		map00561, map00564, map01100	PF01553	Acyltransferase	SM00563	Phosphate acyltransferases							MKNHTIQKLIYELVSKLFVFPIYKFVFKGHLIGRDNIPQKDSFIMVSNHGSLLDPPLLGHALGRNISFMAKAELFRIPCLGFIIKACGAYPVKRGIADKNTIKTACKKLSDDNCIGIFIDGTRQKNGRVNKPKQGAALLAFKNQKLLLPVAIVNSHRLIRFRYFIPLFSKIVIKVGNPVQPPKSSSRYDLNAVTMHLQDKINKLIG
	5121	GC_00001456	Bin_1	JFNG01	318	DETECTED				O							SSF53067	SSF53067			146891.A9601_01561	Peptidase M22 Glycoprotease			G3DSA:3.30.420.40	G3DSA:3.30.420.40	COG1214	tRNA A37 threonylcarbamoyladenosine modification protein TsaB													MTNKRNHRENYSTLVIHSTDNSFGFGYRKNNDLESDELFIKKFDNDLCNNLINDLNKFISKENLQKINKLSVSIGPANFNASRLIVVLARTIAQQINCPLNSFSSFEIMAQRIASKNNILKNKKAFWIFKNLKRKGFIAGKYEICGNEKNSSDLIIRETILPKVVKELDSKELSFEATYDDKKDLKELLDLSNKNLLNSNIDSWKKVLPLYPISPIN
	9375	GC_00001247	Bin_1	JFNG01	319	DETECTED				S											146891.A9601_01571	Hypothetical chloroplast protein Ycf34									PF10718	Hypothetical chloroplast protein Ycf34									MCICINCKWVDRCITYHDVENNHDVDHICDLPDFKAKNPFIHVNIVKDNNGDYKTDWDVQSCESFENEFGKWSKFNPGMELPV
	6600	GC_00000790	Bin_1	JFNG01	320	DETECTED				J							SSF81891	SSF81891			146891.A9601_01581	polymerase			G3DSA:1.10.3090.10	G3DSA:1.10.3090.10	COG0617	tRNA nucleotidyltransferase/poly(A) polymerase		map03013, map03018	PF01743	Poly A polymerase head domain									MKNSFHTDHTLIIDELETSIKFHNLDLILGFLPEGSYLVGGYIRDIILGRQTEKLDVDIVVPLNAIEIGKKIADNIGSKFIILDKRREVVRIILNNIYVDIANQVSSSIEGDLCSRDFSINSIAFLFDKKSLFDPLNGIKDLEISLLRTHSENNLLNDPLRILRCFRFVSELNFKIDLRLVDFIKKNKGNLFLVAKERINYEIQKIANGANALDAVLLIKKLNIFDTENLFEDPFFLDLEKINYGLLDQGEKDKYLPSFFIAQILDVVTLEKLKFSKADIAKTKLLRKWYLFLKNKNIAQFNEFERFKLHQELEMFLPSFIFYLPQKIQFDWLHRWRDNDDKLFHPSNLVNGDVIKKNLGIKDGPILGELLQYLSKELAYKRLNNFDEAIYKAKRWIEQ…
	5275	GC_00001231	Bin_1	JFNG01	321	DETECTED				S					PS50102	Eukaryotic RNA Recognition Motif (RRM) profile.	SSF54928	SSF54928			146891.A9601_01591	rna-binding			G3DSA:3.30.70.330	G3DSA:3.30.70.330	COG0724	RNA recognition motif (RRM) domain			PF00076	RNA recognition motif. (a.k.a. RRM, RBD, or RNP domain)	SM00360	RNA recognition motif							MSIRIYIGNLPQGFNPKEFDTLLKSVSDSIRFKAVLDKETKECRGFGFATSNNEDNANLLIQKLNGFEFNGSKLRVELSEKKDSASNKRNSGKSNKNKKRKDFKKIVHSDAPNLEAPDPRWAGELSKLKDLLANQKTPA
	9306	GC_00000373	Bin_1	JFNG01	322	DETECTED				I							SSF48576	SSF48576			167546.P9301_01621	phytoene synthase			G3DSA:1.10.600.10	G3DSA:1.10.600.10	COG1562	Phytoene/squalene synthetase		map00906, map01062, map01100, map01110	PF00494	Squalene/phytoene synthase					PS01045	Squalene and phytoene synthases signature 2.	Coil	Coil	MKNSISQLDQAYEICRKETQKWAKTFYLGTLLLPVEKRKAIWAIYVWCRRTDEIMDSLEASTKSQDELAENLNTWEENTKNVFKGNIKSELDAVLLDTIEKYPQSIQPYLDMIDGQRMDLNKFRYKDFDELKLYCYRVAGTVGLMTQNVMGIDSAYTSAPWSAKPDPSEAAIALGIANQLTNILRDVGEDRQRGRIYLPQEDIEKFNYSEEKLLKGEINKQWKALMNFQLTRARDWFKKSEDGIKWLSSDARWPVWTSLRLYRGILDSIERLDYDVFNNRAFVKNSVKAFEIPISFLISRIK
	6270	GC_00001537	Bin_1	JFNG01	323	DETECTED				H					PS51257	Prokaryotic membrane lipoprotein lipid attachment site profile.	SSF51905	SSF51905			110662.Syncc9605_2395	phytoene desaturase (EC			G3DSA:3.50.50.60	G3DSA:3.50.50.60	COG3349	Uncharacterized conserved protein, contains NAD-binding domain and a Fe-S cluster		map00906, map01100, map01110	PF01593	Flavin containing amine oxidoreductase			TIGR02731	phytoene_desat: phytoene desaturase					MRVVIAGAGLAGLSCAKYLVDNGHIPIVLEARDVLGGKVAAWKDEDGDWYETGLHIFFGAYPNMLQLFKELDIEDRLQWKSHSMIFNQPSEPGTYSRFDFPDIPAPVNGVSAILSNNDMLSWNEKILFGLGLVPAMLRGQKYLDKCDTKSWTDWLKEHNIPERVNDEVFIAMSKALNFIGPDEISSTVLLTALNRFLQEKNGSKMAFLDGAPPERLCQPMVDYITARGGEVHMNSPLREINLNEDSTVKSFTVASLDKNEKKELTADAFVSAMPVDLFKLMIPKQWKGLDAFSKLDGLNGVPVINIHLWFDKKLTDIDHLLFSRSPLLSVYADMSITCKEYEDPNRSMLELVFAPAKDWINKSDQDIVDATMEELKKLFPTHFMGDDKTNLRKYKVVKT…
	6656	GC_00001258	Bin_1	JFNG01	324	DETECTED		GO:0005575, GO:0005622, GO:0005623, GO:0005886, GO:0009579, GO:0016020, GO:0034357, GO:0042651, GO:0044424, GO:0044436, GO:0044464, GO:0071944		C											146891.A9601_01621	electron donor, via FMN and iron-sulfur (Fe-S) centers, to quinones in the respiratory and or the photosynthetic chain. The immediate electron acceptor for the enzyme in this species is believed to be plastoquinone. Couples the redox reaction to proton translocation, and thus conserves the redox energy in a proton gradient. Cyanobacterial NDH-1 also plays a role in inorganic carbon- concentration…	MF_01352	NAD(P)H-quinone oxidoreductase subunit M [ndhM].						map00190, map01100	PF10664	Cyanobacterial and plastid NDH-1 subunit M									MEKMLLKSTTRHVRIFTAEVVDEELKFHPNKLTLDLDPDNEFIWNEDSLNKINEKFNELIKERAGNDLDDYELRKIGSEIEGLIKFLLQNGQLSYNTDCRVMNYSMGLPKTNEVL
	7415	GC_00001250	Bin_1	JFNG01	325	DETECTED				S																					PF11371	Protein of unknown function (DUF3172)									MDPYGQRSNRLPASSEQKINFSTGTIAVLAGVLILGVGIGSAITSTTDGGQGNIASQQQLDMAVPDPEFCRQWGASAFVIDVEMYTTLNPSTSFVTQPALQPGCVIRRENWTVLQKQGAISNEDVRECKQRMNTFAYIGSIRDKPIVKCVYQTDVNENKFIIKGDGQAEDGGVGINKEAIQF
	100	GC_00001541	Bin_1	JFNG01	326	DETECTED				K			PR00039	LysR bacterial regulatory protein HTH signature	PS50931	LysR-type HTH domain profile.	SSF53850	SSF53850			146891.A9601_01641	transcriptional regulator			G3DSA:1.10.10.10	G3DSA:1.10.10.10	COG0583	DNA-binding transcriptional regulator, LysR family			PF03466	LysR substrate binding domain									MPELPFTLDQLRILKAIAAQGSFKKAADLLYVTQPAVSLQIQNLEKQLEITIFDRGGRKALLTEGGRLLLEYCERILNQCDEACKAIEDLNSLKGGTLIIGASQTTGTYLMPRMIGLFRQKYPDVSVQLQVHSTRRTGWSVANGQIDLAIIGGQLPGDLENLLQVIPYATDELALVLPSKHPLSTKKELLKEDLYKLNFVTLDSQSTTRKVVDKLLQDSGLDIQRLKIEMELNSLEAIKNAVQSGLGASFLPVVSIERELSAGTIHKAFIADLEVKRELKLITNPSRYTSRASEVFKKNILPQFASLESPLRHI
	1199	GC_00001337	Bin_1	JFNG01	327	DETECTED				S											146891.A9601_01651	NnrU family					COG4094	Uncharacterized membrane protein			PF07298	NnrU protein									METHKTSLIIFILILIFAVIHSGGAALRIKAESIMGPRLWRLCFVFLSLPSAIILISYFLAHRYDGIRLWNLQGNNFVFILVWFLTAISFLFLYPATYNLLEIPSVLKPKVRIYGTGIMRITRHPQAFGQIIWCFAHTLWIGTSFTLVTSIGLVLHHLFAIWHGDKRLANRFGEDFENFKKNTSIIPFLAILDGRQEFKIKEFFRLSQVGILIAIGVLWWSHQYINIAVKTFNSSFLSEFFN
	4686	GC_00001611	Bin_1	JFNG01	328	DETECTED		GO:0005575, GO:0005623, GO:0005886, GO:0016020, GO:0044464, GO:0071944		C			PR01434	NADH-ubiquinone oxidoreductase chain 5 signature							146891.A9601_01661	NAD(P)H-quinone oxidoreductase subunit F					COG1009	NADH:ubiquinone oxidoreductase subunit 5 (chain L)/Multisubunit Na+/H+ antiporter, MnhA subunit		map00190, map00910, map01100	PF00361	Proton-conducting membrane transporter			TIGR01974	NDH_I_L: proton-translocating NADH-quinone oxidoreductase, chain L			Coil	Coil	MPQASEIAWLIPVFPLIGAVLSGLGLISINKKINNSRQIVSVGLISFVGISAVISYKALIEQVNGYQSVEKLFVWANAGDFTIPMGFVLDPLGSVMLALVTTITLLVMIYSHGYMAHDKGYVRFFTYLALFSSSMMGLIVSPNLLEIYVFWELVGMCSYLLVGFWYDRDGAAHAAQKAFVVNRVGDFGLLLGILGLFWATNSFDFNEIATGISQSISDHSIPIWAALLLCFLVFLGPMAKSAQFPLHVWLPDAMEGPTPISALIHAATMVAAGIFLVARLQPLYSIFPSIQFIIALVGTITCFLGASIALTQMDLKKGLAYSTVSQLGYMMLAMGCGAPVAGIFHLVTHACFKAMLFLGSGSVIHAMEEVVGHQPVLAQDMRLMGGLRKKMPYTSTTFL…
	8526	GC_00001256	Bin_1	JFNG01	329	DETECTED		GO:0005575, GO:0005622, GO:0005623, GO:0005886, GO:0009579, GO:0016020, GO:0034357, GO:0042651, GO:0044424, GO:0044436, GO:0044464, GO:0071944		C			PR01437	NADH-ubiquinone oxidoreductase subunit 4 signature							146891.A9601_01671	subunit m	MF_00491	NAD(P)H-quinone oxidoreductase chain 4 [ndhD].			COG1008	NADH:ubiquinone oxidoreductase subunit 4 (chain M)		map00190, map01100	PF00361	Proton-conducting membrane transporter			TIGR01972	NDH_I_M: proton-translocating NADH-quinone oxidoreductase, chain M					MSTYFYTHFSTLILGTLGAGLSNFPWLSASILFPIGSAFVIPFFPDKGDGKEVRWFALSIALITFLITVGSYINGFDISNENVQLKENISWLPDLGLTWSVGADGMSMPLILLTSFITALAVLAAWPVKFKPKLFFFLILVMDGGQIAVFAVQDMLLFFLTWELELIPVYLLLAIWGGKNRQYAATKFIIYTAGSSIFILLAALAMGFYGTEIPNFEFSHLAAQDFSQKFQILCYVGLLIAFGVKLPIVPLHTWLPDAHGEATAPVHMLLAGILLKMGGYALLRFNAQLLPVAHAQFAPLLIVLGVVNIIYAALTSFAQRNLKRKIAYSSISHMGFVLIGIGSFSSLGTSGAMLQMVSHGLIGASLFFLVGATYDRTKTLKLDEMSGVGQKMRIMFALW…
	1915	GC_00001416	Bin_1	JFNG01	330	DETECTED				S											146891.A9601_01681	Segregation and condensation protein					COG1354	Chromatin segregation and condensation protein Rec8/ScpA/Scc1, kleisin family			PF02616	ScpA/B protein									MIKFLQDAAGKGELDPWDIDVISVIDSFLEEYSHTFNQSSNSQISYQKDLAETSEAFFAASVLVNLKAEVLEADVFKDNSSDFEDEFDLDDQDWIDKEFDIPKYPEKYLRRRSIAQPILKRTTTLGELVSQLESIAEVIETQDLLLMKRKRNKKYSDRALISQVKSLAHREKLPETTKALGKFIEGWEKALQWTDFEYLVKKWQTVVKNDLDKDRLGVFWALLFLSSENKIEIKQINSLYGPIQIKRIIPDGGLAQLPIENLEVSNASTSAA
	7203	GC_00001436	Bin_1	JFNG01	331	DETECTED				M							SSF53448	SSF53448			167546.P9301_01711	Nucleotidyl transferase			G3DSA:3.90.550.10	G3DSA:3.90.550.10	COG1208	NDP-sugar pyrophosphorylase, includes eIF-2Bgamma, eIF-2Bepsilon, and LPS biosynthesis proteins		map00051, map00520, map01100, map01110	PF00483	Nucleotidyl transferase									-----------------------MKAMILAAGKGTRVQPITHVIPKPMIPILQKPVMEFLLELLREHNFKEIMVNVSHLAEEIENYFRDGQRFGVEIAYSFEGRIEDGELIGDALGSAGGLKKIQDFQNFFDETFVVLCGDALVDLDLTQAVKKHKQKGAIASLITKKVTKDQVSSYGVVVSDENGRIKAFQEKPTVDQALSDSINTGIYLFEPEIFNYIPSAEKFDIGADLFPKLVEMDLPFFALPMDFEWVDIGKVPDYWSAIRNVLQGKVRQVQIPGKEIKPGVFTGLNVAANWEKVNITGPVYIGGMTRIEDGATIIGPSMIGPSCCICEGATIDNSIIFDYSKIGKGVRLMDKLVFGKYCVGKNGDHFDLQDASLDWLIADSRRSDLTEPSPQQ…
	1328	GC_00001555	Bin_1	JFNG01	332	DETECTED				E							SSF51730	SSF51730			146891.A9601_01701	Methylenetetrahydrofolate reductase			G3DSA:3.20.20.220	G3DSA:3.20.20.220	COG0685	5,10-methylenetetrahydrofolate reductase		map00270, map00670, map00720, map01100, map01110, map01120	PF02219	Methylenetetrahydrofolate reductase									MKSKLQQNLEKNSKVITAELMPPRGGSPVRSLKIAQLLKDKVHAVNITDGSRAVMRMCSLAMSKLLLENGIEPVMQISCRDRNKIALQSDILGANALGIRNILCITGDSVKAGDQQDARAVHEFESVRLLKQIQAFNKGIDPTLGELSDKKTFIFAGAAADPNCGNKRSLENRMRKKKEAGAGFIQTQIVMEKENLIEFCEKISKPLEIPVIAGVFLLKSYKNALFINKYVPGANIPENILNRLKDAKEPLQEGIKIAAEQAHDFMNIANGVHLMAVKAEHLIPEIIEKANLSLEY
	2574	GC_00001259	Bin_1	JFNG01	333	DETECTED				K			PR00038	LuxR bacterial regulatory protein HTH signature	PS50043	LuxR-type HTH domain profile.	SSF46894	SSF46894			146891.A9601_01711	Transcriptional Regulator, LuxR family			G3DSA:1.10.10.10	G3DSA:1.10.10.10	COG2771	DNA-binding transcriptional regulator, CsgD family			PF00196	Bacterial regulatory proteins, luxR family	SM00421	helix_turn_helix, Lux Regulon			PS00622	LuxR-type HTH domain signature.			MQMVEEEVNNIDMMGLSAREMEIIDLVADGLTNQEIAVKLTISKRTVDNHVSNMFTKTGSKNRVALLNWAMDNGKICRDGFNCCTLPESDQD
	1860	GC_00001310	Bin_1	JFNG01	334	DETECTED																																			MYGLYDKEGILRFVDSDKDACIAYAELFELGSTNYCLMDLANDTKKVKGNTNLDQIQGAYNN
	5401	GC_00001358	Bin_1	JFNG01	335	DETECTED				S	PIRSF016487	PIRSF016487					SSF55154	SSF55154			146891.A9601_01731	Adenylate cyclase			G3DSA:2.40.320.10	G3DSA:2.40.320.10	COG2954	CYTH domain, found in class IV adenylate cyclase and various triphosphatases		map00230, map04113											MALEIERRFLIKNDNWKEFINKKIYIEQGYFSKSIDGWIIRVRLIGKNSKITLKKHIKGFTNFEFEYSIPRSDAEIIMSNLSNTIKKDRFFLEIEKKSWIIDCFKENNYPLEIAEIELSNEEEDLFLPSFISKEITGLTHYSNFSLANNPFSQWKED-
	4588	GC_00001526	Bin_1	JFNG01	336	DETECTED		GO:0003674, GO:0003824, GO:0003951, GO:0005575, GO:0005622, GO:0005623, GO:0005737, GO:0005829, GO:0006082, GO:0006139, GO:0006461, GO:0006725, GO:0006732, GO:0006733, GO:0006739, GO:0006741, GO:0006753, GO:0006793, GO:0006796, GO:0006797, GO:0006807, GO:0008150, GO:0008152, GO:0009058, GO:0009108, GO:0009117, GO:0009165, GO:0009987, GO:0016043, GO:0016301, GO:0016310, GO:0016740, GO:0016772, GO:…		G							SSF111331	SSF111331			167546.P9301_01761	Catalyzes the phosphorylation of NAD to NADP. Utilizes ATP and other nucleoside triphosphates as well as inorganic polyphosphate as a source of phosphorus (By similarity)	MF_00361	NAD kinase [nadK].	G3DSA:2.60.200.30	G3DSA:2.60.200.30	COG0061	NAD kinase		map00760, map01100	PF01513	ATP-NAD kinase									MKLSLVLIVYRSDSSIAQEASKFCEQVLKEKNIKSNRIESNFHKDEIEKYLSNSESQPNMGIVLGGDGTFLKCANSLTDYDIPLLSINIGGNLGFLTQEKEFLFDKSFVEILENEEYLIDFRNRLNCNVCIEGKSSEKKIIKSYNALNDFYFKSVEEDISPTNQIQIEIDNEKVNEYKGDGLIVSTSTGSTAYSMAAGGPIVHPSIDAMIINPICPMSLASRPIVIPNTSKVIIKPVKKSKGEIKLWTDGSKCMTIKENYYCEIKKGKSPCKIIKFKKSTSYYNTLIKKLDWKGDLSQKN---
	8626	GC_00001245	Bin_1	JFNG01	337	DETECTED		GO:0005575, GO:0005622, GO:0005623, GO:0005886, GO:0009579, GO:0016020, GO:0034357, GO:0042651, GO:0044424, GO:0044436, GO:0044464, GO:0071944		C											93060.P9215_01751	NDH-1 shuttles electrons from NADH, via FMN and iron- sulfur (Fe-S) centers, to quinones in the respiratory chain. The immediate electron acceptor for the enzyme in this species is believed to be ubiquinone. Couples the redox reaction to proton translocation (for every two electrons transferred, four hydrogen ions are translocated across the cytoplasmic membrane), and thus conserves the redox ene…	MF_01456	NAD(P)H-quinone oxidoreductase subunit 4L, chloroplastic [ndhE].			COG0713	NADH:ubiquinone oxidoreductase subunit 11 or 4L (chain K)		map00190, map00910, map01100	PF00420	NADH-ubiquinone/plastoquinone oxidoreductase chain 4L									MNLESIPLQAFLIVSSALFCIGIWGLLNSRNAVRVLMSIELMLNAVNINLMAFSSYIDNNLIQGQVFTIFVITVAAAEAAVGLAILLSLYRNRVTVDMESFNLLKW
	4323	GC_00001232	Bin_1	JFNG01	338	DETECTED		GO:0005575, GO:0016020		C											146891.A9601_01761	NADH dehydrogenase subunit j					COG0839	NADH:ubiquinone oxidoreductase subunit 6 (chain J)		map00190, map00910, map01100	PF00499	NADH-ubiquinone/plastoquinone oxidoreductase chain 6									MSIAITTQLICFTVLSLVVIIGALGVVLLESIVYSAFLLGGVFMSVAGLYLLLNASFVAAAQVLVYVGAVNVLIIFAIMLVNKKEDLKPINDIKSRRVISTSICLTLLSLLIRVDLTNVWSLSSPQNSIGEESTIRIGEHLFSDYLLPFEVASVLLLMAMIGAIVLARRDVMSKDISTGLPVDQELIEKSSEPLLTNKN
	568	GC_00001579	Bin_1	JFNG01	339	DETECTED		GO:0005575, GO:0005622, GO:0005623, GO:0005886, GO:0009579, GO:0016020, GO:0034357, GO:0042651, GO:0044424, GO:0044436, GO:0044464, GO:0071944		C					PS51379	4Fe-4S ferredoxin-type iron-sulfur binding domain profile.	SSF54862	SSF54862			93060.P9215_01771	NDH-1 shuttles electrons from NADH, via FMN and iron- sulfur (Fe-S) centers, to quinones in the respiratory chain. The immediate electron acceptor for the enzyme in this species is believed to be ubiquinone. Couples the redox reaction to proton translocation (for every two electrons transferred, four hydrogen ions are translocated across the cytoplasmic membrane), and thus conserves the redox ene…	MF_01351	NAD(P)H-quinone oxidoreductase subunit I, chloroplastic [ndhI].	G3DSA:3.30.70.20	G3DSA:3.30.70.20	COG1143	Formate hydrogenlyase subunit 6/NADH:ubiquinone oxidoreductase 23 kD subunit (chain I)		map00190, map00910, map01100	PF13237	4Fe-4S dicluster domain			TIGR00403	ndhI: NADH-plastoquinone oxidoreductase, I subunit	PS00198	4Fe-4S ferredoxin-type iron-sulfur binding region signature.			MNNFLQQINSYIKEAFNAAKYLYNGISVTFDHLRRRPVTVQYPYEKLIPSERYRGRIHYEFDKCIACEVCVRVCPINLPVVDWVMNKETKKKELRNYSIDFGVCIFCGNCVEYCPTNCLSMTEEYELATFDRHNLNFDNVALGRLPTNVTTDPSVKPLRELAYLPKGVMDPHEIPASDARVGKLPEEVYDWMRPESNENKDKVSNPTN
	1179	GC_00001618	Bin_1	JFNG01	340	DETECTED		GO:0005575, GO:0005622, GO:0005623, GO:0005886, GO:0009579, GO:0016020, GO:0034357, GO:0042651, GO:0044424, GO:0044436, GO:0044464, GO:0071944		C											74547.PMT2020	NDH-1 shuttles electrons from NADH, via FMN and iron- sulfur (Fe-S) centers, to quinones in the respiratory chain. The immediate electron acceptor for the enzyme in this species is believed to be ubiquinone. Couples the redox reaction to proton translocation (for every two electrons transferred, four hydrogen ions are translocated across the cytoplasmic membrane), and thus conserves the redox ene…	MF_01350	NAD(P)H-quinone oxidoreductase subunit 1, chloroplastic [ndhA].			COG1005	NADH:ubiquinone oxidoreductase subunit 1 (chain H)		map00190, map00910, map01100	PF00146	NADH dehydrogenase					PS00667	Respiratory-chain NADH dehydrogenase subunit 1 signature 1.			MEYGLDLEYSFNEFLKGFGLSSEIAHIIWLPLPMLLVLVAAVVGVLVTVWLERKISAAAQQRIGPEYAGALGVLQPIADGLKLLVKEDIIPAKADGILFTAGPILVLVPVILSWLIVPFGQNLLISNVGIGIFLWIALSSIQPIGLLMSGYASNNKYSLLGGLRAAAQSISYEIPLALSVLAVVLMTNSLSTIDIVNQQSGAGILSWNIWRQPVGFIVFWICALAECERLPFDLPEAEEELVAGYQTEYAGMKFALFYLGSYINLILSALLVSILYLGGWGFPIPVELIAKFLNLPINAPFIQVFTASIGIVMTVLKAYLLVFIAILLRWTTPRVRIDQLLDLGWKFLLPISLANLLITAGLKLAFPQFFGG
	8667	GC_00001235	Bin_1	JFNG01	341	DETECTED				C	PIRSF001369	PIRSF001369	PR00143	Citrate synthase signature			SSF48256	SSF48256			93060.P9215_01791	citrate synthase			G3DSA:1.10.580.10	G3DSA:1.10.580.10	COG0372	Citrate synthase		map00020, map00630, map01100, map01110, map01120, map01210, map01230	PF00285	Citrate synthase			TIGR01800	cit_synth_II: 2-methylcitrate synthase/citrate synthase II					MDSNKLILKPGLEGVPVTNSSICDIDGNKGKLLYRGYSIEELSKKSSFLETAYLLIWGELPTAIQLRDFEQEVQMHRRLSFRVRDMMKCFPATGHPMDALQSSAASLGLFYSRRAIDDPNYIYNAVIRLIAKIPTMIAAFQLIRKGQDPIQPRDDLTYSSNFLYMLTEKEQDPIAAKVFDRCLILHAEHSLNASTFSARVTASTLTDPYAVIASAVGTLAGPLHGGANEDVIAMLEEIKTPENAGSFLDNAIKNKSKIMGFGHREYKVKDPRAIILQKLAEELFIRFGADEMYEVAKSVEAEAIPRLGPKGIFPNVDFYSGLVYRKLGIPRDLFTPIFAISRVAGWLAHWREQLGANRIFRPSQIYTGSAPRDWISLESRE
	8342	GC_00001423	Bin_1	JFNG01	342	DETECTED																																			MKLRVIAIIFLLSLLLFFGFKKIFPNKNKEQSTNIEQLSIIKYIPEKNKLLFISNLDSFNIFNNNEKDKNQTNKDNFVLIKDSILDYLGIDLGNNKLEDIYNNELIITTFENNKKLEDDILIVFKIKPEKTIDDLLNLPKKIDQIDEIIPIFPINRENKINFLNYIYRTDDNYIIASSDKKLIKNSISSSENFKKKKFQYEGELVGLNNEKNILFTNKFLESKFFNKQIFTENNGDNIATTFDFKNKQLILKSYLLNNKKNIDIFTYENLMNKENSNEDNPENLIFCDTKNFDKNLNPLINDFQLSFFEEFNQNNNQNILILNSNKDWLITFEKNDEDQFDISALKKLKDFNKYTLKQNEDTYSIYSKNILEEKDDVIKQLSFENIYSIESGGLQIISN…
	571	GC_00001640	Bin_1	JFNG01	343	DETECTED				P					PS50206	Rhodanese domain profile.	SSF52821	SSF52821			167546.P9301_01831	rhodanese-like protein			G3DSA:3.40.250.10	G3DSA:3.40.250.10	COG0607	Rhodanese-related sulfurtransferase					SM00450	Rhodanese Homology Domain							MGSYPKSINASSLNDWFNSEKEDPVLIDVREQSELDLARFSKEFLHIPISKVTCEYVEEIFAGLLDREIVVTCHAGIRSYNFSQWCLDNNIVSEIWNLEEGIDGWSRYIDPSIPRY
	645	GC_00001339	Bin_1	JFNG01	344	DETECTED				E	PIRSF001413	PIRSF001413					SSF53686	SSF53686			167546.P9301_01841	The beta subunit is responsible for the synthesis of L- tryptophan from indole and L-serine (By similarity)	MF_00133	Tryptophan synthase beta chain [trpB].	G3DSA:3.40.50.1100	G3DSA:3.40.50.1100	COG0133	Tryptophan synthase beta chain		map00260, map00400, map01100, map01110, map01230	PF00291	Pyridoxal-phosphate dependent enzyme			TIGR00263	trpB: tryptophan synthase, beta subunit	PS00168	Tryptophan synthase beta chain pyridoxal-phosphate attachment site.			MVSTFSRKDQNYKNDDLNQPSKEGRFGKYGGQYVPETLMPALFELETAASNAWKDKLFVEELNHLLKTYVGRETPLYEAKRLTEHYKTKQATPRIWLKREDLNHTGAHKINNALGQALLAIRMGKKRIIAETGAGQHGVATATVCARFGLKCIIYMGAEDIKRQSLNVFRMKLLGAEVKVVNSGTATLKDATSEAIRDWVSNVETTHYILGSVAGPHPFPKIVRDFHAVIGEETKKQCLESFGSFPDILLACVGGGSNAMGLFHPFVKETSVRLIGVEAAGSGVDTDKHAATITKGSVGILHGSMSLLLQDDNGQVQEAHSISAGLDYPGVGPEHSHLKDIGRAEYGSVTDQEALNALKLVSELEGIIPALETSHAFAWLDKLCPTLEKDTHIVINCSG…
	2676	GC_00001635	Bin_1	JFNG01	345	DETECTED		GO:0003674, GO:0003676, GO:0003723, GO:0003743, GO:0005488, GO:0005575, GO:0005622, GO:0005623, GO:0005737, GO:0006412, GO:0006413, GO:0008135, GO:0008150, GO:0008152, GO:0009058, GO:0009059, GO:0009987, GO:0010467, GO:0019538, GO:0030529, GO:0032991, GO:0034645, GO:0043021, GO:0043022, GO:0043170, GO:0044237, GO:0044238, GO:0044249, GO:0044260, GO:0044267, GO:0044424, GO:0044444, GO:0044464, GO:…		J	PIRSF037511	PIRSF037511			PS50296	Translation initiation factor SUI1 family profile.	SSF55159	SSF55159			93060.P9215_01831	translation initiation factor, Sui1			G3DSA:3.30.780.10	G3DSA:3.30.780.10	COG0023	Translation initiation factor 1 (eIF-1/SUI1)		map03013	PF01253	Translation initiation factor SUI1									MGKKNWIEFDNQEKKSEEAAKVDTVNKRSKINISKQKKGKKGKTVTLIRGLGTEDEISLKELLKKIKVFCGTGGTLIDRNIQLQGDMVSKSIEFLRKEGFHNL
	7080	GC_00001341	Bin_1	JFNG01	346	DETECTED				P							SSF52540	SSF52540			167546.P9301_01861	Catalyzes the synthesis of activated sulfate (By similarity)	MF_00065	Adenylyl-sulfate kinase [cysC].	G3DSA:3.40.50.300	G3DSA:3.40.50.300	COG0529	Adenylylsulfate kinase or related kinase		map00230, map00920, map01100, map01120	PF01583	Adenylylsulphate kinase			TIGR00455	apsK: adenylyl-sulfate kinase					MMQKMKEQDQTKSTNIKWHNLTIDREKLEKMRGHKGMVIWFTGLSGSGKSTLANALNEVLHLDGFSTYVLDGDNIRHGLCKDLGFSDEDREENIRRIGEVANLFMNAGIITITAFVSPFISDRDKVRKIIGSKDFIEVYCSADITVCENRDTKGLYKKARLGEIKEFTGISSPYEAPHNPEIVVDTGSLDLDDSVEKVINYLKKENFLNKA
	7407	GC_00001241	Bin_1	JFNG01	347	DETECTED		GO:0003674, GO:0003824, GO:0004638, GO:0005575, GO:0005622, GO:0005623, GO:0005737, GO:0005829, GO:0006139, GO:0006163, GO:0006164, GO:0006725, GO:0006753, GO:0006793, GO:0006796, GO:0006807, GO:0008150, GO:0008152, GO:0009058, GO:0009117, GO:0009150, GO:0009152, GO:0009165, GO:0009259, GO:0009260, GO:0009987, GO:0016829, GO:0016830, GO:0016831, GO:0016853, GO:0016866, GO:0018130, GO:0019438, GO:…		F	PIRSF001338	PIRSF001338					SSF52255	SSF52255			146891.A9601_01851	Catalyzes the conversion of N5-carboxyaminoimidazole ribonucleotide (N5-CAIR) to 4-carboxy-5-aminoimidazole ribonucleotide (CAIR) (By similarity)	MF_01929	N5-carboxyaminoimidazole ribonucleotide mutase [purE].	G3DSA:3.40.50.7700	G3DSA:3.40.50.7700	COG0041	Phosphoribosylcarboxyaminoimidazole (NCAIR) mutase		map00230, map01100, map01110	PF00731	AIR carboxylase	SM01001	AIR carboxylase	TIGR01162	purE: phosphoribosylaminoimidazole carboxylase, catalytic subunit					MGSDSDLNTLKPAIDILREFRIKTEVCILSAHRTPIEMMEYAKNAESENIKVIIAGAGGAAHLPGMLASITCIPVIGVPVESKTLKGIDSLLSIVQMPAGIPVATVAINGGQNAGLLAIEIISLFDESIKKNLKEFRENLHTQVRNKNNKLSTIGPDNYLQNK
	36	GC_00000597	Bin_1	JFNG01	348	DETECTED				H					PS51556	Magnesium protoporphyrin IX methyltransferase (EC 2.1.1.11) family profile.	SSF53335	SSF53335			146891.A9601_01861	Mg-protoporphyrin IX methyl transferase			G3DSA:3.40.50.150	G3DSA:3.40.50.150	COG2227	2-polyprenyl-3-methyl-5-hydroxy-6-metoxy-1,4-benzoquinol methylase		map00860, map01100, map01110	PF07109	Magnesium-protoporphyrin IX methyltransferase C-terminus			TIGR02021	BchM-ChlM: magnesium protoporphyrin O-methyltransferase					MTSNKIIEKSEVREYFNGTGFDRWNKIYSKSDEINTVQKNIRKGHQKTVDDVVSYIKNYPELTKKSYCDAGCGVGSLSIPLLRLGIKELQMSDISSEMIKETKKRIHELGLNQGKIKYEVCDLEKLKGLFDVVVCLDVFIHYPQPVAEEMVQHLCDLSKEKLIVSFAPYTPVLAVLKNIGKLFPGPSKTTRAYTLKEKGIINAAKERGFKVVKKKLNQAPFYFSKLIEFEKIK
	5691	GC_00001356	Bin_1	JFNG01	349	DETECTED				T			PR00038	LuxR bacterial regulatory protein HTH signature	PS50043	LuxR-type HTH domain profile.	SSF52172	SSF52172			167546.P9301_01891	Two component transcriptional regulator, luxr family			G3DSA:3.40.50.2300	G3DSA:3.40.50.2300	COG2197	DNA-binding response regulator, NarL/FixJ family, contains REC and HTH domains			PF00072	Response regulator receiver domain	SM00448	cheY-homologous receiver domain							MNEINQINNEPVRKSRILLVDDEPGLRTAVKTFLEDEGFEIFIAVDGEDGWEKAQTIFPDLIISDVMMPRANGYALLEKIREDEKLGGTPVIFLTAKGMTLDRTEGYLAGVDDYISKPFDPDELAARVKNVINRQERLLKEAARFADIDVSKMAKQITEIKSMLTDQNQTNPENKINLPSFTPREASVLQLVAEGLMNKEIARQLETSIRNVEKYVSRLFIKTGTSSRTELVRYALENHLVK
	7186	GC_00000752	Bin_1	JFNG01	350	DETECTED		GO:0001522, GO:0003674, GO:0003824, GO:0004123, GO:0005215, GO:0005488, GO:0005575, GO:0005622, GO:0005623, GO:0005737, GO:0006139, GO:0006396, GO:0006399, GO:0006400, GO:0006725, GO:0006807, GO:0006810, GO:0008033, GO:0008150, GO:0008152, GO:0008483, GO:0009000, GO:0009058, GO:0009451, GO:0009987, GO:0010467, GO:0016043, GO:0016070, GO:0016226, GO:0016740, GO:0016769, GO:0016782, GO:0016783, GO:…		E	PIRSF005572	PIRSF005572					SSF53383	SSF53383			146891.A9601_01881	Cysteine desulfurase			G3DSA:3.40.640.10	G3DSA:3.40.640.10	COG1104	Cysteine sulfinate desulfinase/cysteine desulfurase or related enzyme		map00730, map04122	PF00266	Aminotransferase class-V									MLSTPILLDYQSSTPCSKDVVDSMKPFWSEIFSNPANKSNLAGINASAILEASREKIEQSLFLKNKKVIFTSGATESNNLALLGFARNFYKKTGNYGHIITLKTEHKAVLEPLNQLKKEGFMVTEINPEKDGLISEEQFKKNIREDTFLVSVMLANNEIGVIQPIENISKICKSRGIKFHSDFAQCLGYMALDNLLSDVNMITMSSHKIYGPKGIGLLLIDEEINLEPLIIGGGQEYGLRSGTLPLPLVVGFAKAIEIAVFNQKNNAEKLLFYRNDLLEGLLKNNSGLLINGSIEKRLPHNLNLTVLDLNGAKFHQLLKSKIICSTGSACSNGEPSHVLLALGRSIKEAESSIRLSIGLNTNSKDIKQAIYILTDTIRSLR
	4158	GC_00001354	Bin_1	JFNG01	351	DETECTED		GO:0000154, GO:0001510, GO:0003674, GO:0003824, GO:0005575, GO:0005622, GO:0005623, GO:0005737, GO:0005886, GO:0006139, GO:0006364, GO:0006396, GO:0006725, GO:0006807, GO:0008150, GO:0008152, GO:0008168, GO:0008170, GO:0008173, GO:0008649, GO:0008757, GO:0009451, GO:0009987, GO:0010467, GO:0016020, GO:0016070, GO:0016072, GO:0016434, GO:0016740, GO:0016741, GO:0022613, GO:0031167, GO:0032259, GO:…		M	PIRSF004486	PIRSF004486					SSF53335	SSF53335			167546.P9301_01911	Specifically methylates the N4 position of cytidine in position 1402 (C1402) of 16S rRNA (By similarity)	MF_01007	Ribosomal RNA small subunit methyltransferase H [rsmH].	G3DSA:3.40.50.150	G3DSA:3.40.50.150	COG0275	16S rRNA C1402 N4-methylase RsmH			PF01795	MraW methylase family			TIGR00006	TIGR00006: 16S rRNA (cytosine(1402)-N(4))-methyltransferase					MQTDLSDSSFFNHQSVMTDEIMASLEHYPLINNNQLKGIDATLGGGGHSYHLLRKYSDLNIIGLDQDPFARKSALKKLDEFKSRIDIRASNFADFVPKEKVSFVIADLGVNSNQIDDPKRGFSFQKDGPLDMRMNPLLDVDAEKLIEALNEKDLANLIYKYGDERLSRKIARKIKLDLKENGKYSGTKELAYSIAGCYPPKQRYKKIHPATRTFQALRIAVNKEIEVLEKFLQVVPEWLLPGGIISIISFHSLEDRLVKSCFKNDRRLKNLTKKPITPSEQEVELNRRARSGKLRIAQLN
	8098	GC_00000368	Bin_1	JFNG01	352	DETECTED		GO:0005575, GO:0005622, GO:0005623, GO:0005886, GO:0009579, GO:0016020, GO:0034357, GO:0042651, GO:0044424, GO:0044436, GO:0044464, GO:0071944		C							SSF56762	SSF56762			93060.P9215_01901	NDH-1 shuttles electrons from NADH, via FMN and iron- sulfur (Fe-S) centers, to quinones in the respiratory chain. The immediate electron acceptor for the enzyme in this species is believed to be ubiquinone. Couples the redox reaction to proton translocation (for every two electrons transferred, four hydrogen ions are translocated across the cytoplasmic membrane), and thus conserves the redox ene…	MF_01358	NAD(P)H-quinone oxidoreductase subunit H, chloroplastic [ndhH].	G3DSA:1.10.645.10	G3DSA:1.10.645.10	COG0649	NADH:ubiquinone oxidoreductase 49 kD subunit (chain D)		map00190, map00910, map01100	PF00346	Respiratory-chain NADH dehydrogenase, 49 Kd subunit					PS00535	Respiratory chain NADH dehydrogenase 49 Kd subunit signature.			MAQLETRTEPMVVNFGPHHPSMHGVLR----LVVTLDGENVIDCEPVIGYLHRGME------------------------KIAENRTNVMYVPY---VSRMDYAAGMFYEAIVVNAPERLANIPVPKRAS-------------YIRVLMLELNRIANHLLW---------LGPFLADVGAQTPFFYIFREREM--IYDLWEAATGQRLINNNFFRIGGVACDLPYGWLEKCIDFCDWFGPKIDEYEKLITNNPIFRKRIEGLGTIQRDQAINWSLSGPMLRASGVSWDLRKVDSYECYDDFDWQIASEKEGDCYARYRVRVEEMRQSLSIIRQACKMIPGGPTENLEAQRMATEDKKSEIFGIDYQYVAKKVAPTFKIPNGELYTRLESGKGEIGVFIQ…
	9084	GC_00001468	Bin_1	JFNG01	353	DETECTED		GO:0003674, GO:0003824, GO:0006732, GO:0008150, GO:0008152, GO:0009058, GO:0009108, GO:0009987, GO:0016289, GO:0016787, GO:0016788, GO:0016790, GO:0042180, GO:0042181, GO:0042372, GO:0042374, GO:0042375, GO:0044237, GO:0044249, GO:0044281, GO:0044283, GO:0044710, GO:0044711, GO:0045426, GO:0047617, GO:0051186, GO:0051188, GO:0071704, GO:1901576, GO:1901661, GO:1901663		H							SSF54637	SSF54637			146891.A9601_01911	Catalyzes the hydrolysis of 1,4-dihydroxy-2-naphthoyl- CoA (DHNA-CoA) to 1,4-dihydroxy-2-naphthoate (DHNA), a reaction involved in phylloquinone (vitamin K1) biosynthesis (By similarity)	MF_02101	1,4-dihydroxy-2-naphthoyl-CoA hydrolase.	G3DSA:3.10.129.10	G3DSA:3.10.129.10	COG0824	Acyl-CoA thioesterase FadM		map00130, map01100, map01110	PF13279	Thioesterase-like superfamily									MNPADWLILQKKVRFGDCDSAGVIHFHNLLKWSHEAWEESIEIYGIPSQDIFPDFSIRKSQIIFPIVNCEANFFAPIKIGDLLKVKIAPHKINTHLFQVNSFFIKNGNKVAEGKIIHCSLDVDSRNKMGLPDQLERWIEASNVSTNLKEC
	3440	GC_00001615	Bin_1	JFNG01	354	DETECTED				H							SSF56801	SSF56801			146891.A9601_01921	O-succinylbenzoic acid--CoA ligase			G3DSA:3.40.50.980	G3DSA:3.40.50.980	COG0318	Acyl-CoA synthetase (AMP-forming)/AMP-acid ligase II		map00130, map01100, map01110	PF00501	AMP-binding enzyme					PS00455	Putative AMP-binding domain signature.	Coil	Coil	MKNKIHTIEVENNETQSVEKIIEKIRENKIIYVKNKFYQDKDVLDSITENGPAIILNSSGSSGKPRQCFHHLDNLNLSATTSGQWLIEQGFELQNCLIFNTLPLNHISGLMPIFRSQTWGCDCINISPNLIKKTRELLLFTIKFKKNKKHFITSLVPTQLQRLLAQKDGISWLKIFDLIWVGGASISDETAEQCIKEKIKLAPCYGSTETAAMVTSLKPKEFLMGFKNVGEILPDTNIRINAQGLIEIKSARIGIEIIDSLKTENFKNKNGWWQTGDLGEINQINNSFYLNFVGRSDNAFNSGGEIVFPEVIESRLNNFIMKENIPINKFNISKVSNKLWENKIKVIVEFRELTNNKNIEISLNLLKKFSQSWPKHEKPEKWIVKNKNSITEKINYKFKK
	9503	GC_00001581	Bin_1	JFNG01	355	DETECTED				H							SSF51604	SSF51604			146891.A9601_01931	O-succinylbenzoate synthase			G3DSA:3.20.20.120	G3DSA:3.20.20.120	COG4948	L-alanine-DL-glutamate epimerase or related enzyme of enolase superfamily		map00130, map01100, map01110	PF13378	Enolase C-terminal domain-like	SM00922	Mandelate racemase / muconate lactonizing enzyme, C-terminal domain							MNLIFQKKSYSFKLSDKVENSKTTYHTKSGWIIKLTSNDKKIGFGEVSPLHKEDLKKCATQLDMIPSYVEVLNLSEQINIFHPCIQSAINSALAEINGKIIFKENSYFDEIDKTAILLNHENVISDLNKIKKRQSDIGKSLTIKWKVALKNNHEEEASLEEILSQIGNNIKLRIDANGSWGREIANRWADILKDNKSVDWLEQPLCVDDIDGLTELNKKIPIALDESLLKFPNLIDEWKGWQIRRPSQENNPVKLLRELENKKALISISTSFETGIGKRWLYHLSSLQLQGPTPKVPGLAMNKFPNSFLFLNEAKKIWDQL
	2040	GC_00001605	Bin_1	JFNG01	356	DETECTED		GO:0005575, GO:0005623, GO:0005886, GO:0016020, GO:0044464, GO:0071944		H	PIRSF005355	PIRSF005355									146891.A9601_01941	1,4-dihydroxy-2-naphthoate octaprenyltransferase	MF_01938	1,4-dihydroxy-2-naphthoate phytyltransferase [menA].			COG1575	1,4-dihydroxy-2-naphthoate octaprenyltransferase		map00130, map01100, map01110	PF01040	UbiA prenyltransferase family			TIGR02235	menA_cyano-plnt: 1,4-dihydroxy-2-naphthoate phytyltransferase					MDEDKKKLWKQAIKWPLYSVAVLPVLITGAYLLNQYGKVKIYNLIAFTLAAILILIWENLTNDLFDAETGIDEFKFHSIVNLIQNKKIISFIAYASLVIGLLIISIISVSTSINILILVAACCFLGYLYQGPPFRFGYQGLGEPLCWLAFGPFAYTAVLIALNPSNIFFEDIPWKVSLLLGSGPSLATTLVLFCSHFHQISEDKKHGKNSPLVRLGAKKGSQFVPWIIFTIYIFQLFTIVNRFIPVFCVLYLISFPQAIRLINLLRYSYKNPSAIKNCKFIAIKFQTLNGVGLITGLIFNYLLNK
	3960	GC_00001480	Bin_1	JFNG01	357	DETECTED				H							SSF56322	SSF56322			167546.P9301_01971	Isochorismate synthase			G3DSA:3.60.120.10	G3DSA:3.60.120.10	COG1169	Isochorismate synthase EntC		map00130, map01053, map01100, map01110	PF00425	chorismate binding enzyme			TIGR00543	isochor_syn: isochorismate synthase					MKNDLNLTDFLKDVFSSFDKKVENSGLVSICVEIPCIDLFDVYELLINKYPFSSFWEESDGISYIAFEKCKYVTLDGPKRFEVAKQFNSENFKNLINLTHESHNSALSKIIYLFSFSENLNNKNLPSDIPSLEAILPKILITKSDKNCWLRINGHVEGKSSLRTLIEEIWTIRNQVINSGSELIKSSALKTSFDSPYIDDFSRSLETSKTDMKKIVNRGIQLVEKGILEKIVLANRIKLKFKKKFNLVEILKRFKKKQPNTCRYVWKRNSKDILFGASPEKLFSFSKPNLTLEALAGTISTNSNFKKLLKSTKDLKEHNYVIQYLIKSLEVSKITNFKKSDIKVNSFGDITHLQTLISSKVENICPFELLEKLHPSPAVCGYPKNVALDWINTLESFPR…
	9380	GC_00001576	Bin_1	JFNG01	358	DETECTED		GO:0000287, GO:0003674, GO:0003824, GO:0004363, GO:0005488, GO:0005575, GO:0005622, GO:0005623, GO:0005737, GO:0005829, GO:0006082, GO:0006518, GO:0006520, GO:0006575, GO:0006749, GO:0006750, GO:0006790, GO:0006807, GO:0008150, GO:0008152, GO:0008652, GO:0009058, GO:0009987, GO:0016053, GO:0016874, GO:0016879, GO:0016881, GO:0019184, GO:0019752, GO:0034641, GO:0042398, GO:0043043, GO:0043167, GO:…		H					PS50975	ATP-grasp fold profile.	SSF56059	SSF56059			146891.A9601_01961	glutathione synthase	MF_00162	Glutathione synthetase [gshB].	G3DSA:3.30.470.20	G3DSA:3.30.470.20	COG0189	Glutathione synthase/RimK-type ligase, ATP-grasp superfamily		map00480, map01100	PF02955	Prokaryotic glutathione synthetase, ATP-grasp domain			TIGR01380	glut_syn: glutathione synthase					MKFLFVIDPIKNINPLKDSTAALMQASSKKNIEIWSCTPQDLEARGDEVWASSVKVEVIPWISFKENDCIPLAEFNCIWMRKDPPVNEAYLYATHLLEVAERKGVKVINKPSSLRAWNEKLGALRYSHLMAPTIVASKVKDLINFANINNEVVIKPLGGKGGQGVIRINKNSPGIKSIIELITSQEELPVMMQKFIPEVIEGDKRIIIVNGEAIGSINRIPQGGDFRSNLAMGGKAEPTLLTEKEKSICSELSQHFKDEGLFFVGIDVINGMLSEINVTSPTGLREIENLSNKNVSEEVIEKLLDII
	7826	GC_00001285	Bin_1	JFNG01	359	DETECTED		GO:0005575, GO:0005622, GO:0005623, GO:0005737, GO:0044424, GO:0044464		O			PR00160	Glutaredoxin signature	PS51354	Glutaredoxin domain profile.	SSF52833	SSF52833			146891.A9601_01971	glutaredoxin 3			G3DSA:3.40.30.10	G3DSA:3.40.30.10	COG0695	Glutaredoxin			PF00462	Glutaredoxin			TIGR02181	GRX_bact: glutaredoxin 3	PS00195	Glutaredoxin active site.			MPKVEIYTWQYCPFCIRAKSLLKKKNVNFTEYKIDGDEDARALMIERADGRRTLPQIFIDNEGIGGCDDLYALENENKLEALLN
	8364	GC_00001263	Bin_1	JFNG01	360	DETECTED		GO:0003674, GO:0003676, GO:0003723, GO:0003747, GO:0005488, GO:0005575, GO:0005618, GO:0005622, GO:0005623, GO:0005737, GO:0006412, GO:0006415, GO:0006810, GO:0008079, GO:0008135, GO:0008150, GO:0008152, GO:0009058, GO:0009059, GO:0009987, GO:0010467, GO:0015858, GO:0015862, GO:0015864, GO:0015931, GO:0016043, GO:0016149, GO:0019538, GO:0022411, GO:0030312, GO:0032984, GO:0034645, GO:0040007, GO:…		J							SSF75620	SSF75620			146891.A9601_01981	Peptide chain release factor 2 directs the termination of translation in response to the peptide chain termination codons UGA and UAA (By similarity)			G3DSA:3.30.160.20	G3DSA:3.30.160.20	COG1186	Protein chain release factor B			PF03462	PCRF domain	SM00937	SM00937	TIGR00020	prfB: peptide chain release factor 2	PS00745	Prokaryotic-type class I peptide chain release factors signature.			MLRIVFDVPRLKAKRKELEQISAQPEFWENPEEAKKQMLILDDVKAQLELLDKWKTFISDANASLELYSLEPEEEMILESQLGLKKLRENLDKWEFERLLCGEYDKEGAVVSINAGAGGTDAQDWVEILLRMYSRWADNNQMSLVINELSQGEEAGIKSVTFEIDGKYAYGYLQHEKGTHRLVRISPFNANGKRQTSFAGVEVMPKLDDNISLDIPEKDLEITTSRSGGAGGQNVNKVETAVRIVHLPSGISVRCTQERSQLQNKEKAMLLLKSKLLVIAKEQRAAEVADIKGDIVEAAWGNQIRNYVFHPYQMVKDLRTMQETNELDSVLDGDLEPFIHELLRMNISSNESIE
	2185	GC_00001248	Bin_1	JFNG01	361	DETECTED				S																					PF11688	Protein of unknown function (DUF3285)									MENKNEILEKKVSPPSFIKLAMRNMVRKGSKSISHFSITFLVLIGILILVATIGKPNIPV
	5171	GC_00001229	Bin_1	JFNG01	362	DETECTED																																			MKEKIISEINLDLVFQCNDFSQFSNKLKDTKTHLIFESIFWEKVFLSWINTILKKGNYELPNYIFEKKIF--------------------------------------------------FIRLT---------------------------------------DNI------------
	5170	GC_00001229	Bin_1	JFNG01	363	DETECTED		GO:0003674, GO:0005488, GO:0005575, GO:0005622, GO:0005623, GO:0005737, GO:0006139, GO:0006364, GO:0006396, GO:0006412, GO:0006725, GO:0006807, GO:0006950, GO:0008150, GO:0008152, GO:0009058, GO:0009059, GO:0009266, GO:0009408, GO:0009628, GO:0009987, GO:0010467, GO:0016070, GO:0016072, GO:0016151, GO:0019538, GO:0022613, GO:0034470, GO:0034641, GO:0034645, GO:0034660, GO:0042254, GO:0042274, GO:…		F							SSF55486	SSF55486			146891.A9601_02001	Single strand-specific metallo-endoribonuclease involved in late-stage 70S ribosome quality control and in maturation of the 3' terminus of the 16S rRNA (By similarity)	MF_00009	Endoribonuclease YbeY [ybeY].	G3DSA:3.40.390.30	G3DSA:3.40.390.30	COG0319	ssRNA-specific RNase YbeY, 16S rRNA maturation enzyme		map00240, map00983, map01100	PF02130	Uncharacterized protein family UPF0054			TIGR00043	TIGR00043: rRNA maturation RNase YbeY	PS01306	Uncharacterized protein family UPF0054 signature.			#NAME?
	5839	GC_00001625	Bin_1	JFNG01	364	DETECTED		GO:0005575, GO:0005623, GO:0005886, GO:0016020, GO:0044464, GO:0071944		M											146891.A9601_02011	Diacylglycerol kinase			G3DSA:1.10.3830.10	G3DSA:1.10.3830.10	COG0818	Diacylglycerol kinase		map00561, map00564, map01100, map04070	PF01219	Prokaryotic diacylglycerol kinase					PS01069	Prokaryotic diacylglycerol kinase signature.			MKKKINYLENRKESYKTSSNVFISFKYAFSGISYVLKTSRNFKIQLIFAVASLIIGFLLKISLDNYVILIATIMSVLILEILNTSIESIVDLVVKKEFSILAKISKDTSAGAVLLASINSVIIAVYIFVPKIKLLF
	7446	GC_00001262	Bin_1	JFNG01	365	DETECTED		GO:0000162, GO:0003674, GO:0003824, GO:0004049, GO:0005575, GO:0005623, GO:0005886, GO:0006082, GO:0006520, GO:0006568, GO:0006576, GO:0006586, GO:0006725, GO:0006807, GO:0008150, GO:0008152, GO:0008652, GO:0009058, GO:0009072, GO:0009073, GO:0009308, GO:0009309, GO:0009987, GO:0016020, GO:0016053, GO:0016829, GO:0016830, GO:0016833, GO:0018130, GO:0019438, GO:0019752, GO:0034641, GO:0042401, GO:…		E			PR00097	Anthranilate synthase component II signature	PS51273	Glutamine amidotransferase type 1 domain profile.	SSF52317	SSF52317			167546.P9301_02041	anthranilate synthase			G3DSA:3.40.50.880	G3DSA:3.40.50.880	COG0512	Anthranilate/para-aminobenzoate synthase component II		map00230, map00400, map00790, map00983, map01100, map01110, map01230	PF00117	Glutamine amidotransferase class-I			TIGR00566	trpG_papA: glutamine amidotransferase of anthranilate synthase or aminodeoxychorismate synthase			Coil	Coil	MFLVIDNYDSFTYNLVQYLGELSVEHEITKELIVKRNDEITLEEIIKLNPGGILLSPGPGNPDQSGICLPILKKLSKNIPTLGVCLGHQALAQAFGGKVIVGKELMHGKTSKIFHNQKGLFKDIETPFVATRYHSLIVDSSSLPSCFDITATLEDSTIMAISHKEYKHLHGVQFHPESVLTQFGHKLISNFLKMAEQK
	7037	GC_00000610	Bin_1	JFNG01	366	DETECTED		GO:0005575, GO:0005623, GO:0030288, GO:0030312, GO:0030313, GO:0031975, GO:0042597, GO:0044462, GO:0044464, GO:0071944		S							SSF56281	SSF56281			146891.A9601_02031	zn-dependent hydrolase			G3DSA:3.60.15.10	G3DSA:3.60.15.10	COG2220	L-ascorbate metabolism protein UlaG, beta-lactamase superfamily			PF13483	Beta-lactamase superfamily domain									MISQIKNFLFLILVSSFLPTSLLARNLGIKSMGHSSFLITSADKSILLNPFKAIGCASNLKEPKEVNVDFILASSRLPDEGYNPNNQLMFVEPGIYQFEDILLNGISVPHDRVDGRRFGMATVWSWEQNDLKIVHMGGAAGDIDINSQIILSDPDILFISIGGGIKSYNGKEASKIVKLLKPNVVIPVHFERGKKINKECDFSNANLFIENMKDFKVKYVGKDFQIKPKRIDQNTIYIFSN
	6992	GC_00000482	Bin_1	JFNG01	367	DETECTED				E							SSF53383	SSF53383			93060.P9215_02041	Imidazole acetol-phosphate transaminase			G3DSA:3.40.640.10	G3DSA:3.40.640.10	COG0079	Histidinol-phosphate/aromatic aminotransferase or cobyric acid decarboxylase		map00340, map00350, map00360, map00400, map00401, map00960, map01100, map01110, map01230	PF00155	Aminotransferase class I and II					PS00105	Aminotransferases class-I pyridoxal-phosphate attachment site.			MNDFDPLNNLFPKPREEIINMQSYSAPLENRRNLLRLDFNENTLGPSPKVLEALQAIKLDEISIYPEYNFLKKFLCDKYLDSRRFGNDEIGIFNGADAAINAIFNCFGEKDQIFLTTNPTFGYYSPCAEIRGMKKISCSYIGENFLFPIEEFREKIIKHNPKLIFICNPNNPTGTVLSSHEIINLSNINKDSLIVVDELYEKFNGDSLLESIDFEENKNILIIQSLSKTAGLAGLRIGFTFGNKSLIQYINKVTGPYDVNSFAITAALAALKDKSYIDNYVLEVKKAREWILNKFKSTEIRTHFSGGNYFLIWPKKDPKILIQQMREKGILIRSMENKKDIGNSIRVSIGTKEQMIFFWDNYKILDLKN
	152	GC_00000584	Bin_1	JFNG01	368	DETECTED		GO:0003674, GO:0003824, GO:0004812, GO:0004814, GO:0005575, GO:0005622, GO:0005623, GO:0005737, GO:0006082, GO:0006139, GO:0006399, GO:0006412, GO:0006418, GO:0006420, GO:0006520, GO:0006725, GO:0006807, GO:0008150, GO:0008152, GO:0009058, GO:0009059, GO:0009987, GO:0010467, GO:0016070, GO:0016874, GO:0016875, GO:0016876, GO:0019538, GO:0019752, GO:0034641, GO:0034645, GO:0034660, GO:0043038, GO:…		J			PR01038	Arginyl-tRNA synthetase signature			SSF52374	SSF52374			146891.A9601_02051	arginyL-tRNA synthetase	MF_00123	Arginine--tRNA ligase [argS].	G3DSA:3.40.50.620	G3DSA:3.40.50.620	COG0018	Arginyl-tRNA synthetase		map00970	PF00750	tRNA synthetases class I (R)	SM00836	DALR anticodon binding domain	TIGR00456	argS: arginine--tRNA ligase	PS00178	Aminoacyl-transfer RNA synthetases class-I signature.			MLIIFKELTKQFEQSLLDSLEKNDKKGEFEILRKNLITQSSKEEFGDYQCNVCLSLSKIYKKNPRDISNDFINLLNKNISISKLCKSLEIAGPGFINIKLKDEVLINEIKSNIQCNRAGIPLFRKDLDSGLSNKVIVDFSSPNIAKEMHVGHLRSTIIGDSISRIFELRGYEVLRLNHVGDWGTQFGMLITQLKDLYSNDLEEIGKIKISDLVEFYKESKKRFDNESEFQKRSREEVVKLQSGDIKSIKAWKLLCDQSRKEFNEIYKNLKIKIEERGESFYNPFLKSVIDDLNLEKILVEDQGAKCVFLDGMTNKEGKPLPLIIQKKDGGFNYATTDLAAIRYRFNKPPNGDDASRIIYVTDHGQANHFAGVFQVAKKAKWIPENCQVDHVPFGLVQGI…
	1083	GC_00001182	Bin_1	JFNG01	369	DETECTED				H	PIRSF006250	PIRSF006250					SSF51690	SSF51690			146891.A9601_02061	nicotinate-nucleotide pyrophosphorylase			G3DSA:3.20.20.70	G3DSA:3.20.20.70	COG0157	Nicotinate-nucleotide pyrophosphorylase		map00760, map01100	PF01729	Quinolinate phosphoribosyl transferase, C-terminal domain			TIGR00078	nadC: nicotinate-nucleotide diphosphorylase (carboxylating)					MDLNTSIISKIIDNWIDEDIGRGDLTSSSITEENGNAYWIAKEEGIFCGVEIIKEIFRKIDLKISPKFNISDGDQFVKDQKLLEIYGPSKSLLASERISLNIAMHLSGISTYTKNLVNKLEGTNIKLADTRKTTPGLRIFEKYAFKCGGGVNHRMGLYDAAMIKENHIAWTDNLNNAVKKIRLNSPFTTHIIIEAENIEQAKEAVLAGADSVLLDELSPEIIKKNVQELRDLSMNSLKKEVNKNLIIEVSGINPEEISKYLIKGIDLISTSSSITKSNWIDLSMRYIN
	1353	GC_00000774	Bin_1	JFNG01	370	DETECTED		GO:0000166, GO:0001510, GO:0001882, GO:0001883, GO:0003674, GO:0003824, GO:0003924, GO:0005488, GO:0005525, GO:0005575, GO:0005622, GO:0005623, GO:0005737, GO:0005829, GO:0006139, GO:0006152, GO:0006163, GO:0006184, GO:0006195, GO:0006396, GO:0006399, GO:0006400, GO:0006725, GO:0006753, GO:0006793, GO:0006796, GO:0006805, GO:0006807, GO:0008033, GO:0008150, GO:0008152, GO:0009056, GO:0009116, GO:…		S			PR00449	Transforming protein P21 ras signature	PS51709	TrmE-type guanine nucleotide-binding (G) domain profile.	SSF116878	SSF116878			146891.A9601_02071	Exhibits a very high intrinsic GTPase hydrolysis rate. Involved in the addition of a carboxymethylaminomethyl (cmnm) group at the wobble position (U34) of certain tRNAs, forming tRNA- cmnm(5)s(2)U34 (By similarity)	MF_00379	tRNA modification GTPase MnmE [mnmE].	G3DSA:1.20.120.430	G3DSA:1.20.120.430	COG0486	tRNA U34 5-carboxymethylaminomethyl modifying GTPase MnmE/TrmE			PF12631	MnmE helical domain			TIGR00450	mnmE_trmE_thdF: tRNA modification GTPase TrmE			Coil	Coil	MDSIVTTEDTIAAIASAISIGKGGVAIIRVSGKDAINSCKKIVQTKSKYAWKSHRVFRGFIQENKQNKFIDEVLIFVMKAPNSFTGEDVVELHCHGGIIIVNKVLKILLSSNSRVRLANPGEFSQRAFLNGKIDLTQAESINQLINASNTRSAELAFSGVQGEIKKKIDDIKNDLINQLCEIEARVDFEEDFTDFDYTKYLKKIKKVKEKIELLIENAKRNSYIHNGISIALIGKTNVGKSSLLNLLAKKEKAIVTNIPGTTRDVIEVNLTINDIPMKIIDTAGIRETHEQIESIGIKKSFGKIKESDFIIYIYSLEEGFNEEDKKIIQEIPKEKLITILGNKKDLIDCKNINSNELKNTILMSIKNNDGERLLTDTIIKKCGLKQVENINIFLNERHL…
	5072	GC_00000360	Bin_1	JFNG01	371	DETECTED				S											146891.A9601_02081	Uncharacterized protein conserved in bacteria (DUF2062)					COG3216	Uncharacterized conserved protein, DUF2062 family			PF09835	Uncharacterized protein conserved in bacteria (DUF2062)									MRFKRDITYKKILSLFRSQNGSPFFNAKGLAIGVFSGCFPFFGFQTLMGVFFAKIAKGNIVLAAIGTWISNPFTYIPLYYFNYKVGSIFLNNPSNKILEKSLVIDDLWKQGRIFSLKLLLGSSCVGILLALICGSIVFFIYKIKSKR
	5918	GC_00000558	Bin_1	JFNG01	372	DETECTED		GO:0003674, GO:0003824, GO:0005488, GO:0005575, GO:0005618, GO:0005622, GO:0005623, GO:0005737, GO:0005886, GO:0006139, GO:0006163, GO:0006725, GO:0006753, GO:0006793, GO:0006796, GO:0006807, GO:0006950, GO:0007154, GO:0008150, GO:0008152, GO:0008728, GO:0008893, GO:0009116, GO:0009117, GO:0009119, GO:0009150, GO:0009259, GO:0009267, GO:0009405, GO:0009605, GO:0009987, GO:0009991, GO:0015949, GO:…		K, T					PS51671	ACT domain profile.	SSF109604	SSF109604			146891.A9601_02091	In eubacteria ppGpp (guanosine 3'-diphosphate 5-' diphosphate) is a mediator of the stringent response that coordinates a variety of cellular activities in response to changes in nutritional abundance (By similarity)			G3DSA:3.30.460.10	G3DSA:3.30.460.10	COG0317	(p)ppGpp synthase/hydrolase, HD superfamily		map00230	PF13328	HD domain	SM00954	Region found in RelA / SpoT proteins	TIGR00691	spoT_relA: RelA/SpoT family protein					MSEAAANSKEKNEIEVSKTILPENKKYESESLNYQINIPDWLLKDIHNFEKSNKENNENQNLIVKAFKLAYKAHDGQFRASGEPYIIHPVAVANLLKEIGASSSVIAAGLLHDVVEDTGIDLSEIETNFGLEVKILVEGVTKLGGIHFNNRTEAQAENLRKMFLAMASDIRVVLVKLADRLHNMRTIEWLNDEKKLRIARETREIYAPLANRLGINRFKWELEDLAFKFLEPKEYLDLKDQIAVKRSDREKRLKVTLNLMKENLNSAGLKNFEITGRPKHLYGIWSKMERQQKHFHEIYDVAALRIIVDNSDSCYRALAVVHDTFKPIPGRFKDYIGLPKPNGYQSLHTSVIGRHRPIEVQIRTTSMHQIAEYGIAAHWQYKEGGSPAKSNAERFNWLR…
	3370	GC_00000933	Bin_1	JFNG01	373	DETECTED				S					PS50893	ATP-binding cassette, ABC transporter-type domain profile.	SSF52540	SSF52540			146891.A9601_02101	ABC transporter			G3DSA:3.40.50.300	G3DSA:3.40.50.300	COG1123	ABC-type glutathione transport system ATPase component, contains duplicated ATPase domain		map02010	PF00005	ABC transporter	SM00382	ATPases associated with a variety of cellular activities			PS00211	ABC transporters family signature.			MEKNKEKIILVKNLTVKYGLKQQPIIKNFNLEIDRGDHLAIIGSSGCGKTTFAKTLVNILPAKAISKGYLSISNVDPRKINNKDAQLFRRKNFGFIYQDSIKKLNPLMRVGDHLYELFKTHDQNKSSLAIKKLVREVFQKVGIEESRLDSFPHQFSGGMRQRVSIAMALALKPKLLIADEPTTSLDTKTSFEIMQEIIHLCNEFDTTLILISHDINLAAKWCKKVAIIEKGSIVEKGNILDIFQSPKSDIGKKLVNASKIVLEPNTKNNARDQVVLEVNNLRHWYKLNSSIFINKWNKALNEVSFKLYENETLGIVGSSGSGKSTLCRALIGLLKVRGGEIKIYDKNHASKKNKSFKKNNKVQIIFQDPFSSLNPKMTIKSILEDIFFIQKISDKRKIE…
	2091	GC_00000429	Bin_1	JFNG01	374	DETECTED				J					PS50889	S4 RNA-binding domain profile.	SSF55120	SSF55120			146891.A9601_02111	Pseudouridine synthase			G3DSA:3.10.290.10	G3DSA:3.10.290.10	COG0564	Pseudouridylate synthase, 23S rRNA- or tRNA-specific			PF00849	RNA pseudouridylate synthase	SM00363	S4 RNA-binding domain	TIGR00005	rluA_subfam: pseudouridine synthase, RluA family	PS01129	Rlu family of pseudouridine synthase signature.	Coil	Coil	MELNNQNSFGIGEGELIEIIYELPLPMRLDRWLVSKRPEQSRARIQHFINSGLVLVNYKTAKAKTPLKNGDNIQIWMPPPEPLIYLKPEKMDLNILFEDEHIIVINKQSGLIVHPAPGHKSGTLVNGLLFHCKDLPGINGKLRPGIVHRLDKDTSGCMVVAKSQEALVNLQKQIKEKIASREYIAVIHGAPNSEEGQIVGNIGRDKLNRLKYKVVEETSGRYACTYWKLEERFGNYSLMSFKLDTGRTHQIRVHCSHINHPIVGDPLYGRCKKLPCKLDGQALHAIKLGLIHPINGKEMIFESELPLDFQKLLSVLKIK
	4794	GC_00000243	Bin_1	JFNG01	375	DETECTED		GO:0003674, GO:0003824, GO:0003924, GO:0005575, GO:0005622, GO:0005623, GO:0005737, GO:0006139, GO:0006152, GO:0006163, GO:0006184, GO:0006195, GO:0006725, GO:0006753, GO:0006793, GO:0006796, GO:0006807, GO:0008150, GO:0008152, GO:0009056, GO:0009116, GO:0009117, GO:0009119, GO:0009141, GO:0009143, GO:0009144, GO:0009146, GO:0009150, GO:0009154, GO:0009164, GO:0009166, GO:0009199, GO:0009203, GO:…		K	PIRSF006230	PIRSF006230					SSF52540	SSF52540			146891.A9601_02121	Required for a late step of 50S ribosomal subunit assembly. Has GTPase activity (By similarity)			G3DSA:3.40.50.300	G3DSA:3.40.50.300	COG1161	Ribosome biogenesis GTPase A			PF01926	50S ribosome-binding GTPase			TIGR03596	GTPase_YlqF: ribosome biogenesis GTP-binding protein YlqF					MDIPKIQWYPGHIAKAEKKLSEVINKVDLVIEVRDARIPLSTGHPHLNKWINNKKHILVINRSDMISPNTINSWNKWFNSKDQYPLWCDAKRGIGIKEICKSAKDSRSSIDDRRLSRGMRIRPIRALTLGFPNVGKSALINRIAKKRVVDSARKAGVTRNLRWIKLESGIDLLDAPGVIPPNLEDQKSALNLALCDDIGEAAYEIESVAIGFIKIISTLNKDKNANISVKQISNRYGIDITKGFKSPSAWIDEAASKHTSGDKRRMSHKLLEDYRNQMLGKIALEVPLWN
	5138	GC_00000542	Bin_1	JFNG01	376	DETECTED		GO:0005575, GO:0005576, GO:0005622, GO:0005623, GO:0005737, GO:0005886, GO:0008150, GO:0016020, GO:0040007, GO:0044424, GO:0044464, GO:0071944		G	PIRSF000724	PIRSF000724	PR00477	Phosphoglycerate kinase family signature			SSF53748	SSF53748			146891.A9601_02131	Phosphoglycerate kinase	MF_00145	Phosphoglycerate kinase [pgk].	G3DSA:3.40.50.1270	G3DSA:3.40.50.1270	COG0126	3-phosphoglycerate kinase		map00010, map00051, map00562, map00710, map01100, map01110, map01120, map01230	PF00162	Phosphoglycerate kinase					PS00111	Phosphoglycerate kinase signature.			MSKLSLSSLDKTHLEGKKVLVRVDFNVPLNEDGQITDDTRIRAAIPTIEYLINHSAKVILAAHFGRPKGQVNEKMRLTPVAARLSELLGQNVALTNSCIGDEAVAQSNSLSNGDVLLLENVRFFGEEEKNDLEFAEKLASHADMYVNDAFGAAHRAHASTQGVTNYLSPSVAGFLLEKELKYLQGAVDSPNRPLAAIVGGSKVSSKIGVLDSLLDKCDKIMIGGGMIFTFYKARGLDVGKSLVEEDKLELAKDLEAKAKAKGVELLLPTDVVLADEFSPDANSKISQIDAISGNWMGLDIGPDSIKVFQNALAECKTIIWNGPMGVFEFDKFADGTNAIATTLADLSAFSEVCTIIGGGDSVAAVEKAGLAEKMSHISTGGGASLELLEGKTLPGVAAL…
	5154	GC_00000256	Bin_1	JFNG01	377	DETECTED		GO:0005575, GO:0005623, GO:0030288, GO:0030312, GO:0030313, GO:0031975, GO:0042597, GO:0044462, GO:0044464, GO:0071944		S																															#NAME?
	2493	GC_00001071	Bin_1	JFNG01	378	DETECTED		GO:0000270, GO:0003674, GO:0003824, GO:0005575, GO:0005623, GO:0005886, GO:0006022, GO:0006023, GO:0006024, GO:0006807, GO:0008150, GO:0008152, GO:0008194, GO:0008375, GO:0009058, GO:0009059, GO:0009252, GO:0009273, GO:0009987, GO:0016020, GO:0016740, GO:0016757, GO:0016758, GO:0030203, GO:0034645, GO:0040007, GO:0042546, GO:0043170, GO:0044036, GO:0044038, GO:0044085, GO:0044237, GO:0044249, GO:…		M							SSF53756	SSF53756			146891.A9601_02151	Cell wall formation. Catalyzes the transfer of a GlcNAc subunit on undecaprenyl-pyrophosphoryl-MurNAc-pentapeptide (lipid intermediate I) to form undecaprenyl-pyrophosphoryl-MurNAc- (pentapeptide)GlcNAc (lipid intermediate II) (By similarity)	MF_00033	UDP-N-acetylglucosamine--N-acetylmuramyl-(pentapeptide) pyrophosphoryl-undecaprenol N-acetylglucosamine transferase [murG].	G3DSA:3.40.50.2000	G3DSA:3.40.50.2000	COG0707	UDP-N-acetylglucosamine:LPS N-acetylglucosamine transferase		map00550, map01100, map04112	PF04101	Glycosyltransferase family 28 C-terminal domain			TIGR01133	murG: undecaprenyldiphospho-muramoylpentapeptide beta-N-acetylglucosaminyltransferase					MSKKNNLLVAASGTGGHIFPALAVSKEVEDEWNIHWLGIQQRLDAHLIPQKYNLKTLNLKTPRKNIFLFYQYIKILMSTFQIIRILKEKKINLVFTTGGYISAPTIVASKLLKIPIIIHESNVVPGMVTKYFGFLCNYVLLGFKETNSYLKNCKTIFTGTPLREQFYKFNFLPEWVPKGNGPLLIVMGGSQGAKAINQILYESLEFLIKKQFRIVHIVGGSNLKPFHAKNSKNYIQKKFTNEIAALIQNCDLVISRSGAGTINELMEAEKPSILIPYPYSKNNHQEKNAMILAASGGSVLINQNNMSKEVFEETLERIFKIKSKKGKKYFEILDLMKKNMENNNKIKSKNEIKKYIDYFLKEF
	146	GC_00000286	Bin_1	JFNG01	379	DETECTED		GO:0003674, GO:0003824, GO:0006725, GO:0006766, GO:0006767, GO:0006807, GO:0008150, GO:0008152, GO:0009058, GO:0009110, GO:0009235, GO:0009236, GO:0009987, GO:0018130, GO:0019438, GO:0033013, GO:0033014, GO:0034641, GO:0042364, GO:0044237, GO:0044249, GO:0044271, GO:0044281, GO:0044283, GO:0044710, GO:0044711, GO:0046483, GO:0071704, GO:1901360, GO:1901362, GO:1901564, GO:1901566, GO:1901576		E							SSF53383	SSF53383			146891.A9601_02161	decarboxylase			G3DSA:3.40.640.10	G3DSA:3.40.640.10	COG0079	Histidinol-phosphate/aromatic aminotransferase or cobyric acid decarboxylase		map00340, map00350, map00360, map00400, map00401, map00860, map00960, map01100, map01110, map01230	PF00155	Aminotransferase class I and II					PS00105	Aminotransferases class-I pyridoxal-phosphate attachment site.			#NAME?
	826	GC_00000209	Bin_1	JFNG01	380	DETECTED		GO:0000166, GO:0003674, GO:0003824, GO:0004152, GO:0004158, GO:0005488, GO:0005575, GO:0005623, GO:0005886, GO:0006139, GO:0006206, GO:0006207, GO:0006220, GO:0006221, GO:0006725, GO:0006753, GO:0006793, GO:0006796, GO:0006807, GO:0008150, GO:0008152, GO:0009058, GO:0009112, GO:0009117, GO:0009165, GO:0009218, GO:0009220, GO:0009259, GO:0009260, GO:0009987, GO:0010181, GO:0016020, GO:0016491, GO:…		F							SSF51395	SSF51395			146891.A9601_02171	Catalyzes the conversion of dihydroorotate to orotate with quinone as electron acceptor (By similarity)	MF_00225	Dihydroorotate dehydrogenase (quinone) [pyrD].	G3DSA:3.20.20.70	G3DSA:3.20.20.70	COG0167	Dihydroorotate dehydrogenase		map00240, map01100	PF01180	Dihydroorotate dehydrogenase			TIGR01036	pyrD_sub2: dihydroorotate dehydrogenase (fumarate)	PS00911	Dihydroorotate dehydrogenase signature 1.			MNEQKGVFKNLYKNLITPVLKKDSGIDAEYLTNLSISLLSFSSRKYNWPVVASILKNLNKEFSVIDKRLTQNICGINFCNPIGLAAGFDKNGNAANIWKDFGFGFAELGTVTKFAQNGNPKPRLFRLAAEEAALNRMGFNNNGAENLVKNFVEQGIEFKKNRENICLGINFGKSKITDLSQAKDDYLTSLKLLIPYCDYAAINVSSPNTEGLRKLQDPILLKELLREIKNLPNCPPLFVKIAPDLGLKDIEDICQLIIEENIDGIIATNTSIDRLGLENRKIRQTGLLLSKENGGLSGRPLQKKANQIIKHIHNIDKKIILIGVGGIDSPESAWERICSGASLIQLYTGWIYKGPQLVPDILEGFIKQLNNHQLSSIKDAIGSDLKWVE
	862	GC_00000273	Bin_1	JFNG01	381	DETECTED		GO:0005575, GO:0005622, GO:0005623, GO:0005737, GO:0044424, GO:0044464		L					PS50879	RNase H domain profile.	SSF53098	SSF53098			93060.P9215_02181	Endonuclease that specifically degrades the RNA of RNA- DNA hybrids (By similarity)	MF_00042	Ribonuclease H [rnhA].	G3DSA:3.30.420.10	G3DSA:3.30.420.10	COG0328	Ribonuclease HI		map03030	PF00075	RNase H									MNSDSIAIEAATDGACSGNPGPGGWGGLIIFEDNSELEIGGSEQNTTNNRMELTAAIKTLEKLKTYQLKENFKLRTDSKYVIEGYTKWIINWKRNGWKTSSGKPVQNLDLWQKIDQLRINGLIMEYVKGHSGDKQNDRVDKIATNYSKGISIESNLKKAESSVDFFEKNAPAEIQELFSRNELIKKFAEKKYLLSSPELDTLLGEENHLMVKQYALFEWRNWRFIPKDKKYWIIEKKKPNFL
	7297	GC_00000380	Bin_1	JFNG01	382	DETECTED		GO:0003674, GO:0003735, GO:0005198, GO:0005575, GO:0005618, GO:0005622, GO:0005623, GO:0005737, GO:0005829, GO:0005840, GO:0005886, GO:0006412, GO:0008150, GO:0008152, GO:0009058, GO:0009059, GO:0009987, GO:0010467, GO:0015934, GO:0016020, GO:0019538, GO:0022625, GO:0022626, GO:0030312, GO:0030529, GO:0032991, GO:0034645, GO:0040007, GO:0043170, GO:0043226, GO:0043228, GO:0043229, GO:0043232, GO:…		J							SSF54736	SSF54736	PD001326	RIBOSOMAL L7/L12 50S RIBONUCLEOPROTEIN CHLOROPLAST L12 PLASTID DIRECT SEQUENCING PEPTIDE	146891.A9601_02191	Seems to be the binding site for several of the factors involved in protein synthesis and appears to be essential for accurate translation (By similarity)	MF_00368	50S ribosomal protein L7/L12 [rplL].	G3DSA:3.30.1390.10	G3DSA:3.30.1390.10	COG0222	Ribosomal protein L7/L12		map03010	PF00542	Ribosomal protein L7/L12 C-terminal domain			TIGR00855	L12: ribosomal protein bL12					MSAKTEEILESLKSLSLLEASELVKQIEEAFGVSAAASAGVVMAAPGAAGGDADGGAAEEKTEFDVVLESFDAAAKIKVLKVVRNATGLGLGDAKALVESAPKTVKEGIAKADAESLKKEIEEAGGKVTLK
	2177	GC_00001076	Bin_1	JFNG01	383	DETECTED				J							SSF160369	SSF160369			146891.A9601_02201	50S ribosomal protein l10	MF_00362	50S ribosomal protein L10 [rplJ].			COG0244	Ribosomal protein L10		map03010	PF00466	Ribosomal protein L10									MGRTLENKQKIVTEIKSLLDDSEMAVVLDYKGLTIKEMSDLRSRLQTTNGICKVTKNSLMRKAINGDSNWNDLESLLTGTNAFVLIKEDVGGAVKAIQSFQKDTKKSETKGALFEGRLLSDSEIKEIASLPSKEVLMAKIACALNGVATKIAISINEVPSGLARSLKQHSEKSES
	6344	GC_00000167	Bin_1	JFNG01	384	DETECTED		GO:0003674, GO:0003735, GO:0005198, GO:0005575, GO:0005618, GO:0005622, GO:0005623, GO:0005737, GO:0005829, GO:0005886, GO:0006412, GO:0006417, GO:0006446, GO:0008150, GO:0008152, GO:0009058, GO:0009059, GO:0009889, GO:0009890, GO:0009892, GO:0009987, GO:0010467, GO:0010468, GO:0010556, GO:0010558, GO:0010605, GO:0010608, GO:0016020, GO:0017148, GO:0019222, GO:0019538, GO:0030312, GO:0031323, GO:…		J	PIRSF002155	PIRSF002155					SSF56808	SSF56808			167546.P9301_02231	Binds directly to 23S rRNA. The L1 stalk is quite mobile in the ribosome, and is involved in E site tRNA release (By similarity)	MF_01318_B	50S ribosomal protein L1 [rplA].	G3DSA:3.30.190.20	G3DSA:3.30.190.20	COG0081	Ribosomal protein L1		map03010	PF00687	Ribosomal protein L1p/L10e family			TIGR01169	rplA_bact: ribosomal protein uL1	PS01199	Ribosomal protein L1 signature.			MKKLSKRMAALSTKIEDRIYAPLEALSIIKENANAKFDETIEAHIRLGIDPKYTDQQLRTTVALPHGTGQSIKIAVITSGENVSKAKAAGADLFGEEDLVESINKGNMEFDLLIATPDMMPKVAKLGRVLGPRGLMPNPKAGTVTNDIANAIKEFKAGKLEFRADKAGIVHVRFGKASFTKEALFDNLKTLQESIDKNKPSGAKGKYWKTFYVTSTMGPSVQVDINAVQDYQPEG
	4721	GC_00000192	Bin_1	JFNG01	385	DETECTED		GO:0003674, GO:0003735, GO:0005198, GO:0005575, GO:0005618, GO:0005623, GO:0006412, GO:0008150, GO:0008152, GO:0009058, GO:0009059, GO:0009987, GO:0010467, GO:0019538, GO:0030312, GO:0034645, GO:0040007, GO:0043170, GO:0044237, GO:0044238, GO:0044249, GO:0044260, GO:0044267, GO:0044464, GO:0071704, GO:0071944, GO:1901576		J							SSF54747	SSF54747	PD001367	RIBOSOMAL RIBONUCLEOPROTEIN L11 RRNA-BINDING RNA-BINDING METHYLATION 50S L11 BACTERIAL CHLOROPLAST	146891.A9601_02221	This protein binds directly to 23S ribosomal RNA (By similarity)	MF_00736	50S ribosomal protein L11 [rplK].	G3DSA:3.30.1550.10	G3DSA:3.30.1550.10	COG0080	Ribosomal protein L11		map03010	PF03946	Ribosomal protein L11, N-terminal domain	SM00649	Ribosomal protein L11/L12	TIGR01632	L11_bact: ribosomal protein uL11	PS00359	Ribosomal protein L11 signature.			MAKKIVAVIKLALQAGKANPAPPVGPALGQHGVNIMAFCKEYNARTQDKAGFVIPVEISVFEDRSFTFITKTPPASVLITKAAGIEKGSGESAKGSVGNISKAQLEEIAKTKLPDLNCSSVKSAMKVIEGTARNMGVSVTD
	1402	GC_00000129	Bin_1	JFNG01	386	DETECTED		GO:0005575, GO:0005618, GO:0005622, GO:0005623, GO:0005634, GO:0005654, GO:0005886, GO:0006139, GO:0006351, GO:0006353, GO:0006355, GO:0006725, GO:0006807, GO:0008023, GO:0008150, GO:0008152, GO:0009058, GO:0009059, GO:0009889, GO:0009987, GO:0010467, GO:0010468, GO:0010556, GO:0016020, GO:0016070, GO:0018130, GO:0019219, GO:0019222, GO:0019438, GO:0030312, GO:0031323, GO:0031326, GO:0031554, GO:…		K			PR00338	Transcription termination factor NUSG signature			SSF82679	SSF82679			146891.A9601_02231	Participates in transcription elongation, termination and antitermination (By similarity)	MF_00948	Transcription termination/antitermination protein NusG [nusG].	G3DSA:3.30.70.940	G3DSA:3.30.70.940	COG0250	Transcription antitermination factor NusG			PF02357	Transcription termination factor nusG	SM00738	In Spt5p, this domain may confer affinity for Spt4p. It possesses a RNP-like fold.	TIGR00922	nusG: transcription termination/antitermination factor NusG	PS01014	Transcription termination factor nusG signature.			MSNELTTNLASSKANTSIARWYAVQVASSCEKKVKATLEQRSVTLGVNNRIIEIEIPQTPGIKLKKDGSRQTTEEKVFPGYVLVRMILDEDTMMAVKSTPNVINFVGAEDGRGSGRSRGHIKPRPLSRQEVNRIFKRASEKKAVIKLDIEEKDRIIVTSGPFKDFQGEVIEVSGERNKLKALLSIFGRETPVELEFSQINKQN
	7499	GC_00000849	Bin_1	JFNG01	387	DETECTED		GO:0005575, GO:0005623, GO:0005886, GO:0016020, GO:0044464, GO:0071944		U											146891.A9601_02241	preprotein translocase subunit SecE	MF_00422	Protein translocase subunit SecE [secE].	G3DSA:1.20.5.1030	G3DSA:1.20.5.1030	COG0690	Preprotein translocase subunit SecE		map03060, map03070	PF00584	SecE/Sec61-gamma subunits of protein translocation complex			TIGR00964	secE_bact: preprotein translocase, SecE subunit					#NAME?
	5783	GC_00000022	Bin_1	JFNG01	388	DETECTED		GO:0005575, GO:0005622, GO:0005623, GO:0005737, GO:0044424, GO:0044464		O			PR00300	ATP-dependent Clp protease ATP-binding subunit signature			SSF52540	SSF52540			167546.P9301_02271	ATP-dependent Clp protease, Hsp 100, ATP-binding subunit ClpB			G3DSA:3.40.50.300	G3DSA:3.40.50.300	COG0542	ATP-dependent Clp protease ATP-binding subunit ClpA			PF07724	AAA domain (Cdc48 subfamily)	SM01086	C-terminal, D2-small domain, of ClpB protein			PS00871	Chaperonins clpA/B signature 2.	Coil	Coil	MRETLTSSPELFSDISWNLLLLGEETAKKWDHSEFNIEHIIHTLFSSSEFFAFIEKLSIDQDTVLDITEDFLEETPTNESDIFTIGEDLEILLDNANQIKTQWGSRLIEIPHLLIALGRDLRIGNYVFEEGNLSMEKLEEELKFYPNINQSKDSFNYGNVIEINNQSNFEYDKETLVKEEKLKKAIVPLPKSELQIETKKQVGKDENALSIYGKDLTESAKKGLLDPVLGRENEINNLMRVLCRRNKNNPILIGNPGVGKTSIAKLLAQLIVDKKVPDTLKDFKIISLDLGALVSGTKFRGQLEERLSLIMQELNNPNQGMILFIDEIHSILSSDRSSTDISNILKPLLAEGELRCIGTTTPEKFRETIEKDQALNNCFQKIAVNEPSVELSAKILRGI…
	1895	GC_00000460	Bin_1	JFNG01	389	DETECTED		GO:0005575, GO:0005576, GO:0005622, GO:0005623, GO:0005737, GO:0009986, GO:0044424, GO:0044464		G	PIRSF001400	PIRSF001400	PR00148	Enolase signature			SSF51604	SSF51604			167546.P9301_02281	Catalyzes the reversible conversion of 2- phosphoglycerate into phosphoenolpyruvate. It is essential for the degradation of carbohydrates via glycolysis (By similarity)	MF_00318	Enolase [eno].	G3DSA:3.20.20.120	G3DSA:3.20.20.120	COG0148	Enolase		map00010, map00680, map01100, map01110, map01120, map01230, map03018, map04066	PF00113	Enolase, C-terminal TIM barrel domain			TIGR01060	eno: phosphopyruvate hydratase	PS00164	Enolase signature.			MKETIDFLIDTIESRQVLDSRGNPTVEAEVFLECGASGRAIVPSGASTGAHEAHELRDGGSKYMGKGVLNAVNKIHETISPALCGLSALDQTAVDKLMIEIDGTPNKSNLGANSILAVSLATARASANALEVPLYRYLGDPLSNLLPVPLMNVINGGAHAPNSLDFQEFMLVPHGVNNFSESLRMGTEIFHSLKSLLDKKGLSTAVGDEGGFAPNLSSSEEAGDLLLEAIQKAGFKPGEQVSLALDAASTEFYSDGIYKYEGKSLNSSEMISYLSKLVTNYPIVSIEDGLAEDDWEGWSELNRELGNKVQLVGDDLFVTNTERLRKGIMEKSANSILIKVNQIGTLTETLEAIELAKMSGFTSVISHRSGETEDTTIADLSVATRSGQIKTGSLSRSER…
	5954	GC_00001040	Bin_1	JFNG01	390	DETECTED				H							SSF56112	SSF56112			146891.A9601_02271	Required, probably indirectly, for the hydroxylation of 2-octaprenylphenol to 2-octaprenyl-6-hydroxy-phenol, the fourth step in ubiquinone biosynthesis (By similarity)			G3DSA:3.90.1200.10	G3DSA:3.90.1200.10	COG0661	Predicted unusual protein kinase regulating ubiquinone biosynthesis, AarF/ABC1/UbiB family		map00130, map01100, map01110	PF03109	ABC1 family									MSYYIFHYRLKKLKRAFLIWITLISLLINLWIDNIRFTIFQTKNNEKSRVQIKRARWFTNELIKLGSAFIKIGQLLSARPDLIPNTWIQELSKLQDQVPNFSFLQVQDTIRDELGSKFNEIDQIIRDPVGSASLAQVHRATLKDGKKVVFKVQRPNLKGLFIIDLGIMQQIAGLLQKNKNWSRGRNWVEIAKECRKVLMKELDFNCEAQYAARFRQQFLDDENVEVPEVIWDMSSEKVLCLSYLEGTKISDLEKLQSQEIDLPKIAEIGAISYLKQLVNYGFFHADPHPGNLAVSNEGKLIFYDFGMMGNISNNLQTRLGGMVKAAALRDASSLVSQLQQAGLISKDIDVGPVRRLVRLMLKEALTPPFSPNIIEKLSGDLYELVYETPFQLPVDLIFV…
	2082	GC_00000427	Bin_1	JFNG01	391	DETECTED																																	Coil	Coil	MTNSDYLLKAAIKKVTEKLNEILVEKIEEATHIAQDAPEILKKEFDSLKESIIEEASRLEKAENNQENESTNTYQDSKIKKALNEITAINNQIDLVNKTMNNQIK
	4375	GC_00000727	Bin_1	JFNG01	392	DETECTED		GO:0005575, GO:0005622, GO:0005623, GO:0005737, GO:0044424, GO:0044464		O			PR00469	Pyridine nucleotide disulphide reductase class-II signature			SSF51905	SSF51905			146891.A9601_02291	FAD-dependent pyridine nucleotide-disulphide oxidoreductase (EC 1.8.1.9)			G3DSA:3.50.50.60	G3DSA:3.50.50.60	COG0492	Thioredoxin reductase		map00240, map00450	PF07992	Pyridine nucleotide-disulphide oxidoreductase									MEIIESDVVIIGGGPAGCTCALYTSRSNLKTVILDKNPSVGALAITHQIANYPGVPVDISGEKLLTLMREQAVQYGTDYRRAQVFGIDASGEWKMVYTPEGTFKAKALVLASGAMGRPASFKGEADFLGKGVSYCATCDGAFYKNREVAVVGVNKEAIEEATVLTKFASTVHWITSSDPKSDNEEAMELMDNSNIKHWSRTRLLEILGDDMGVNGVVVKNKQEENPINLNLDGVFVYMSGSKPITDFLGDQIALKEDGGVIVDDFMSTNSDGVWAIGDIRNTPFKQAVVAASDGCIAAMSIDRYLNSRKNIRVDWIHS
	7817	GC_00000343	Bin_1	JFNG01	393	DETECTED				S							SSF54913	SSF54913			146891.A9601_02301	Inherit from NOG: nitrogen regulatory protein PII			G3DSA:3.30.70.120	G3DSA:3.30.70.120															MKRLDLIFSERELDAIIKTLEKANVPGYTIMKHATGRGPERVVTEDMEFTGLGANAHVIVFCEQELIDKMRDNIRDDLSYYGGVAYISEATPL
	3987	GC_00000341	Bin_1	JFNG01	394	DETECTED				S											167546.P9301_02331	Sodium-dependent bicarbonate transporter					COG3329	Uncharacterized conserved protein			PF05982	Na+-dependent bicarbonate transporter superfamily									MEISPILQNVLAPPVLFFLIGAISVLFKSDLEIPAPLPKLFSLYLLLAIGFKGGIEIQKSGFTDQVLPTLSAAILMSLVIPLIGFLILRFKFDVFNSAAIAAAYGSISAVTFISAESFLESQKIAFDGFMVGALALMESPAIIVGLLLVKFAAPKNRPKSRKMHLSAILHESLLNGSVYLLLSSLIVGFLTASSNPSGIEKMEPFTGQLFYGAECFFLLDMGIVAAQRLPRLKNAGSFLIGFAIFMPLFNAFIGVFVARFLSLGPGNALLFVVLCASASYLAVPAAMRMTVPEAKSSYYISTTLGLTFPFNIVLGIPIYMSLVNTIIPLSPL
	3126	GC_00000570	Bin_1	JFNG01	395	DETECTED				P					PS50801	STAS domain profile.	SSF52091	SSF52091			146891.A9601_02331	sulfate transporter			G3DSA:3.30.750.24	G3DSA:3.30.750.24	COG0659	Sulfate permease or related transporter, MFS superfamily			PF00916	Sulfate permease family									---------MNIINGFHLKNVRGDILGGITAAVVALPLALAFGNAALGPGGAIYGLYGAVVVGFLAALFGGTPAQVSGPTGPMSVTVAGVVAGLAAVGVPRDLSAGQILPLVMAAVVIGGLLQILFGILKLGKYITLVPYSVVSGFMSGIGVIIIALQIGPLLGISTRGGVVESLTTVFSNFQPNGAAIGVAIMTLGIVFLTPRKISQWVPSPLLALLIVTPISILIFGDGAIDRIGEIPRGVPSLNFPSFNQYFPIIFKAGLVLAVLGAIDSLLTSLVADNISQTKHNSDRELIGQGIGNAVAGLFSGLPGAGATMRTVINVKSGGSTPISGMVHSVVLLIVLVGAGPLAEQIPTALLAGILIKVGLDIIDWGFLRRAHKLSLKTSVVMYGVLLMTVF…
	2475	GC_00000808	Bin_1	JFNG01	396	DETECTED		GO:0003674, GO:0003824, GO:0004655, GO:0006725, GO:0006778, GO:0006779, GO:0006807, GO:0008150, GO:0008152, GO:0009058, GO:0009987, GO:0016829, GO:0016835, GO:0016836, GO:0018130, GO:0019438, GO:0033013, GO:0033014, GO:0034641, GO:0044237, GO:0044249, GO:0044271, GO:0046483, GO:0051186, GO:0051188, GO:0071704, GO:1901360, GO:1901362, GO:1901564, GO:1901566, GO:1901576		H	PIRSF001415	PIRSF001415	PR00144	Delta-aminolevulinic acid dehydratase signature			SSF51569	SSF51569			146891.A9601_02351	delta-aminolevulinic acid dehydratase			G3DSA:3.20.20.70	G3DSA:3.20.20.70	COG0113	Delta-aminolevulinic acid dehydratase, porphobilinogen synthase		map00860, map01100, map01110	PF00490	Delta-aminolevulinic acid dehydratase	SM01004	Delta-aminolevulinic acid dehydratase			PS00169	Delta-aminolevulinic acid dehydratase active site.			-------------MNSIIRPRRLRRTEAIREMVRENHLAASDFIYPLFIHEKEFKEEISAMPGTYRWDINGLLKEVTRAWELGIRCVVLFPKINDSLKTEDGAECFNEDGLIPKAIRILKKEIPEMAIMTDVALDPYSCDGHDGLVDETGNILNDETIAILKKQALTQARAGADFIGPSDMMDGRVGAIRTALDSEGFSDVGIISYTAKYSSAYYGPFRTALDSAPRENSKKVIPDNKSTYQMDPANSKEALIESALDQYEGADILMVKPGISYLDIVYRLSTFSNKPIAAYNVSGEYSMVKSAAMKNWINEKDIVLETLLSFKRAGAKLILTYHACDASQWLQDT
	31	GC_00000564	Bin_1	JFNG01	397	DETECTED				S							SSF54593	SSF54593			146891.A9601_02361	Glyoxalase Bleomycin resistance protein (Dioxygenase			G3DSA:3.10.180.10	G3DSA:3.10.180.10					PF00903	Glyoxalase/Bleomycin resistance protein/Dioxygenase superfamily					PS00934	Glyoxalase I signature 1.			MKFSQAVNRIGHIALRVENLERAKSFYIKLGMKLVWDDKDWSYLEAGKGKDGLALLGPSYKAAGPHFAFHFENKKEVENIQNDLKNSGVKVGPLHEHRDGTASFYMKDTEGNWLEMLYVPPEGIQSNT
	1642	GC_00001019	Bin_1	JFNG01	398	DETECTED		GO:0000018, GO:0000217, GO:0000400, GO:0003674, GO:0003676, GO:0003677, GO:0003824, GO:0004518, GO:0004519, GO:0005488, GO:0006139, GO:0006152, GO:0006163, GO:0006195, GO:0006200, GO:0006259, GO:0006281, GO:0006725, GO:0006753, GO:0006793, GO:0006796, GO:0006807, GO:0006950, GO:0006974, GO:0008150, GO:0008152, GO:0009056, GO:0009116, GO:0009117, GO:0009119, GO:0009123, GO:0009125, GO:0009126, GO:…		L	PIRSF005814	PIRSF005814			PS50828	Smr domain profile.	SSF52540	SSF52540			146891.A9601_02371	muts2 protein	MF_00092	Endonuclease MutS2 [mutS2].	G3DSA:3.40.50.300	G3DSA:3.40.50.300	COG1193	dsDNA-specific endonuclease/ATPase MutS2		map03430	PF00488	MutS domain V	SM00534	ATPase domain of DNA mismatch repair MUTS family	TIGR01069	mutS2: MutS2 family protein	PS00486	DNA mismatch repair proteins mutS family signature.	Coil	Coil	----------------MQEKSYSKKSYSDNTLEEESINLLEWDSLKTHLSSFASTEMGKRSILSFVIPSEYEASKRLLNETVEINELEKNLDKSISFSGVFDISRNIEICSKGGVISSSELLEIAKTISAARNLKKILLDFEQRPYISSFTKNLIDHQNIETIFKKGIESNGRISDNASNELSILRKEFLSKKLERKILVEKFIQKNLAYLQDTTIGDRYGRPVLAVKVNYVDKFKGIIHDSSSSGNTVYFEPESVVTKGNKIASLEARITAEEFKLLKKWSQVVSDNSENLIEMASILLRLENALTRSRYSKWIGGKTPTFEKSPIISLIGFSHPLLIWEHKKKGAPPPVAVDFYINRNIKVVAITGPNTGGKTAALKGLGLSLLMARAGLLIPSTNN…
	9470	GC_00000154	Bin_1	JFNG01	399	DETECTED		GO:0000166, GO:0000287, GO:0001882, GO:0001883, GO:0003674, GO:0003824, GO:0003924, GO:0005488, GO:0005525, GO:0005575, GO:0005622, GO:0005623, GO:0005737, GO:0005829, GO:0005840, GO:0005886, GO:0006139, GO:0006152, GO:0006163, GO:0006184, GO:0006195, GO:0006464, GO:0006468, GO:0006725, GO:0006753, GO:0006793, GO:0006796, GO:0006807, GO:0006996, GO:0007059, GO:0008150, GO:0008152, GO:0009056, GO:…		C	PIRSF002401	PIRSF002401	PR00326	GTP1/OBG GTP-binding protein family signature	PS51710	OBG-type guanine nucleotide-binding (G) domain profile.	SSF82051	SSF82051			167546.P9301_02391	An essential GTPase which binds GTP, GDP and possibly (p)ppGpp with moderate affinity, with high nucleotide exchange rates and a fairly low GTP hydrolysis rate (By similarity). It may play a role in control of the cell cycle, stress response, ribosome biogenesis and in those bacteria that undergo differentiation, in morphogenesis control	MF_01454	GTPase Obg [obg].	G3DSA:2.70.210.12	G3DSA:2.70.210.12	COG0536	GTPase involved in cell partioning and DNA repair			PF01018	GTP1/OBG			TIGR02729	Obg_CgtA: Obg family GTPase CgtA					MQFIDQANIILKAGKGGNGIVSFRREKFVPAGGPSGGNGGRGGSVILMADNNLQTLLDFKFKREIIAEDGCKGGPNKRSGASGEDRILKVPCGTEIRDIKSGIILGDLTKDKQSLTIAIGGRGGHGNAYYLSNQNRAPESFTEGKDGEIWEVQLELKLLAEVGIIGLPNAGKSTLISVVSSARPKIANYPFTTLIPNLGVVRKIDGNGCLFADIPGLISGAADGVGLGHDFLRHIQRTKILVHLIDAIAENPLHDFEIIEAGIKK---------------------------------------------------------IWERSFR
	9471	GC_00000154	Bin_1	JFNG01	400	DETECTED		GO:0000166, GO:0000287, GO:0001882, GO:0001883, GO:0003674, GO:0003824, GO:0003924, GO:0005488, GO:0005525, GO:0005575, GO:0005622, GO:0005623, GO:0005737, GO:0005829, GO:0005840, GO:0005886, GO:0006139, GO:0006152, GO:0006163, GO:0006184, GO:0006195, GO:0006464, GO:0006468, GO:0006725, GO:0006753, GO:0006793, GO:0006796, GO:0006807, GO:0006996, GO:0007059, GO:0008150, GO:0008152, GO:0009056, GO:…		C					PS51710	OBG-type guanine nucleotide-binding (G) domain profile.	SSF52540	SSF52540			167546.P9301_02391	An essential GTPase which binds GTP, GDP and possibly (p)ppGpp with moderate affinity, with high nucleotide exchange rates and a fairly low GTP hydrolysis rate (By similarity). It may play a role in control of the cell cycle, stress response, ribosome biogenesis and in those bacteria that undergo differentiation, in morphogenesis control			G3DSA:3.40.50.300	G3DSA:3.40.50.300	COG0536	GTPase involved in cell partioning and DNA repair													-------------------------------------------------------------------------------------MILR------------------------------------------------------------------------------------------------------------------------------------------------------------------------LLKQELKKYGKGLLDKERIIVLNKMELVDDDYLKIITKKLEDLSKKKVLVISSSLKKGLSSLLSEVWKRI--
	62	GC_00000057	Bin_1	JFNG01	401	DETECTED				S																															MNFYSCFDKQGKIIARCQTIQDIEVLKKMGRPIVEVKEMKNEESVVCSLTGSPSDFNMDY
	8202	GC_00000350	Bin_1	JFNG01	402	DETECTED				S											146891.A9601_02401	CP12									PF02672	CP12 domain	SM01093	SM01093					Coil	Coil	MKSIDEHIQKDQSEIESAKAEGNLPKVRHLTEELKELEEYKDHHPEDKHDPNALELFCDANPDEPECLVYDD
	1382	GC_00000986	Bin_1	JFNG01	403	DETECTED				O	PIRSF015753	PIRSF015753			PS51399	SEP domain profile.	SSF47616	SSF47616			167546.P9301_02421	Glutathione S-transferase			G3DSA:1.20.1050.10	G3DSA:1.20.1050.10	COG0435	Glutathionyl-hydroquinone reductase			PF13409	Glutathione S-transferase, N-terminal domain									---------------------MNGFAPSDLHGNYKRPKGITIDSEYDINNENRQIYLLVGNSCPWCQRTLLVHAIKHLSKKVKVIFLKADLEHGEWIFNRKFKGCMRLSDLYKKANKKIIFRATLPLLISFVKNEVNILSNESSQIIRLLNSIKIQSEIQILTIKDCNQKFLDLINNRINDGVYKCGFARNQLAYENASQNLFAAINEVENFLQKNKGDWIFGEELTYADIYLFPTLIRWELIYSKLFKCTEQELSNFKKIIEWRLNFFKLSNVNRTCFDNEWKKDYYKALFPLNPNQLIPVLPSLEQIMRLESEKI--------
	3425	GC_00001150	Bin_1	JFNG01	404	DETECTED				E	PIRSF018001	PIRSF018001					SSF53187	SSF53187	PD014532	VP3 TRANSFERASE NUCLEOTIDE-BINDING CORE GTP-BINDING INNER GUANYLYLTRANSFERASE NUCLEOTIDYLTRANSFERASE GUANYLYL	146891.A9601_02421	Aspartoacylase (EC 3.5.1.15)	MF_00704	Probable aspartoacylase.	G3DSA:3.40.630.10	G3DSA:3.40.630.10	COG2988	Succinylglutamate desuccinylase		map00250, map00340	PF04952	Succinylglutamate desuccinylase / Aspartoacylase family							Coil	Coil	MTVQRILIVSGTHGNEINPVWAVKKFIREENILNHGIEYEYIIGNPVAYEKGNRYIDVDLNRSFKKIKNHDQYNNSVYEINRANFLVDQFGIHGSKPCQIAIDLHTTTANMGTSIVLYGRRFKDFCLAALLQNKFGLPIYLHEKDKAQTGFLVEAWPCGLVIEIGAVAQNFYDPKIIDRFLIIIRSLREEIDKLKNNLIELPKELVVHVHQGSIDYPRDEKGYIDGLIHPERINQDWKMIKKGDPLFLDSQGIIHKYKGGELIWPVFIGEVAYKEKNIAMSYTKKEVISSNNQWVYEFESL
	2764	GC_00000325	Bin_1	JFNG01	405	DETECTED		GO:0005575, GO:0005622, GO:0005623, GO:0009579, GO:0016020, GO:0034357, GO:0042651, GO:0044424, GO:0044436, GO:0044464		C			PR00256	Bacterial photosynthetic reaction centre signature			SSF81483	SSF81483			32049.SYNPCC7002_A2164	This is one of the two reaction center proteins of photosystem II	MF_01379	Photosystem II protein D1 [psbA].	G3DSA:1.20.85.10	G3DSA:1.20.85.10				map00195, map01100	PF00124	Photosynthetic reaction centre protein			TIGR01151	psbA: photosystem II q(b) protein	PS00244	Photosynthetic reaction center proteins signature.			MTTIQQQRSSLLKGWPQFCEWVTSTNNRIYVGWFGVLMIPCLLTAAACFIVAFIAAPPVDIDGIREPVAGSFLYGNNIISGAVVPSSNAIGLHFYPIWEAATVDEWLYNGGPYQLVIFHFLIGISAYMGRQWELSYRLGMRPWICVAYSAPVSAAFAVFLVYPFGQGSFSDGMPLGISGTFNFMFVFQAEHNILMHPFHMAGVAGMFGGSLFSAMHGSLVTSSLIRETTETESQNYGYKFGQEEETYNIVAAHGYFGRLIFQYASFNNSRSLHFFLAVFPVVCVWLTSMGICTMAFNLNGFNFNQSVVDANGKIVPTWGDVLNRANLGMEVMHERNAHNFPLDLAAAESTTVALSAPAIG
	1510	GC_00001085	Bin_1	JFNG01	406	DETECTED				E	PIRSF001456	PIRSF001456					SSF103263	SSF103263			146891.A9601_02451	5-enolpyruvylshikimate-3-phosphate phospholyase	MF_00300	Chorismate synthase [aroC].	G3DSA:3.60.150.10	G3DSA:3.60.150.10	COG0082	Chorismate synthase		map00400, map01100, map01110, map01230	PF01264	Chorismate synthase			TIGR00033	aroC: chorismate synthase	PS00788	Chorismate synthase signature 2.			MSSSFGKIFRVSTFGESHGGAVGVILDGCPPKLKIDINLIQNELDRRRPGQSDITTPRNEEDKIEILSGIKEGLTLGTPIAMLVRNKDQRPGDYNNLEQVFRPSHADGTYHLKYGIQASSGGGRASARETIGRVAAGAVAKQLLKTFCNTEILSWVKRIHDIDSDINKEKISLKKIDSNIVRCPDEKVSIEMIERIKELKRLGDSCGGVIECLVRNVPSGLGMPVFDKLEADLAKALMSLPATKGFEIGSGFSGTYLKGSEHNDAFIKSDDISKLRTTSNNSGGIQGGISNGENIEMKIAFKPTATIGKEQKTVNAEGKEVLMKAKGRHDPCVLPRAVPMVDAMVALVLADHLLLNHAQCDLINK
	4960	GC_00001069	Bin_1	JFNG01	407	DETECTED		GO:0003674, GO:0003824, GO:0005575, GO:0005622, GO:0005623, GO:0005737, GO:0005829, GO:0005975, GO:0008150, GO:0008152, GO:0008675, GO:0008700, GO:0009255, GO:0009987, GO:0016020, GO:0016829, GO:0016830, GO:0016832, GO:0016833, GO:0044237, GO:0044238, GO:0044262, GO:0044281, GO:0044424, GO:0044444, GO:0044464, GO:0044710, GO:0071704		G							SSF51569	SSF51569			74546.PMT9312_0227	2-dehydro-3-deoxyphosphogluconate aldolase 4-hydroxy-2-oxoglutarate aldolase			G3DSA:3.20.20.70	G3DSA:3.20.20.70	COG0800	2-keto-3-deoxy-6-phosphogluconate aldolase		map00030, map00040, map00052, map00330, map00630, map01100, map01120	PF01081	KDPG and KHG aldolase									MNNKEDSFSEFLKIESFFLLIKPEDNIYSNTSIRNSFFEELENLVKLGLNNIEISWSNNENWFDFVSYIKIKYPRINLGSASIFNKQSIEDSLKIGLNFSMMKFWDQDLFNYAQSNNYLLIPGINNLKDLKEAIDLNCKIIKIYPIKSKDSSINILNYKNVDFIAAGGLSINDLKTYKSLGYKAVVIGDKAIKNKKFDPKIYEWLKNN
	811	GC_00000687	Bin_1	JFNG01	408	DETECTED		GO:0000910, GO:0003674, GO:0003824, GO:0004175, GO:0004222, GO:0005575, GO:0005622, GO:0005623, GO:0005737, GO:0005829, GO:0005886, GO:0006139, GO:0006152, GO:0006163, GO:0006195, GO:0006200, GO:0006508, GO:0006725, GO:0006753, GO:0006793, GO:0006796, GO:0006807, GO:0006950, GO:0006979, GO:0007049, GO:0008150, GO:0008152, GO:0008233, GO:0008237, GO:0009056, GO:0009057, GO:0009116, GO:0009117, GO:…		O							SSF140990	SSF140990			146891.A9601_02471	Acts as a processive, ATP-dependent zinc metallopeptidase for both cytoplasmic and membrane proteins. Plays a role in the quality control of integral membrane proteins (By similarity)	MF_01458	ATP-dependent zinc metalloprotease FtsH [ftsH].	G3DSA:3.40.50.300	G3DSA:3.40.50.300	COG0465	ATP-dependent Zn proteases			PF01434	Peptidase family M41	SM00382	ATPases associated with a variety of cellular activities	TIGR01241	FtsH_fam: ATP-dependent metallopeptidase HflB	PS00674	AAA-protein family signature.			MNKRWRNVGLYVLAVITVIFIGTSVFDKPSTESSTKTLRYSDFIEAVQDKEISRVLISPDNATAQVVENDGSRSEVNLAPDKDLLKILTDNNVDIAVTPTKLANPWQQAVSSLIFPVLLIGGLFFLFRRSQSGNAGGGNPAMSFGKSKARLQMEPSTQVTFSDVAGVEGAKLELTEVVDFLKSPDRFTAVGAKIPKGVLLVGPPGTGKTLLAKAVAGEAGVPFFSISGSEFVEMFVGVGASRVRDLFEQAKKNAPCIVFIDEIDAVGRQRGAGMGGGNDEREQTLNQLLTEMDGFEGNSGIIIVAATNRPDVLDSALMRPGRFDRQVTVDRPDYAGRLQILNVHAKDKTLSKDVDLDKVARRTPGFTGADLANLLNEAAILAARKDLDKVSNDEVGDAI…
	8337	GC_00000900	Bin_1	JFNG01	409	DETECTED		GO:0000103, GO:0003674, GO:0003824, GO:0004779, GO:0004781, GO:0006790, GO:0008150, GO:0008152, GO:0009987, GO:0016740, GO:0016772, GO:0016779, GO:0044237, GO:0070566		P							SSF52374	SSF52374			146891.A9601_02481	Sulfate adenylate transferase			G3DSA:3.40.50.620	G3DSA:3.40.50.620	COG2046	ATP sulfurylase (sulfate adenylyltransferase)		map00230, map00450, map00920, map01100, map01120	PF01747	ATP-sulfurylase			TIGR00339	sopT: sulfate adenylyltransferase					MELQQKTKSDTNGLIPPYGGELKNLIIKDKNIKNDLISKANYEFECSERNACDVELLMVGAFSPLEGFMDENNYNSVIKNNRNTNGLLFGLPIVFDSNNEKVKAGETILLTYKKQNIAVLEVSSKWEPDKSLEAELCYGTNSLDHPAVKMIFNERGRFYIGGRVYGFELPIREFPCKTPEEVRSTLPSNHDVVAFQCRNPIHRAHYELFTNALLSDNVSSNSVVLVHPTCGPTQQDDIPGKVRYLTYKELEEEISDERIKWAFLPYSMHMAGPREALQHMIIRRNYGCTHFIIGRDMAGCKSSSTGEDFYGPYDAQNFANKCADELMMQTVPSKNLVYTKEKGYITAEEAKEFNYEIMKLSGTEFRKKLRNGEPIPEWFAFKSVVDVLRRS
	8742	GC_00000519	Bin_1	JFNG01	410	DETECTED		GO:0005575, GO:0005622, GO:0005623, GO:0005737, GO:0005886, GO:0009521, GO:0009523, GO:0009579, GO:0016020, GO:0030075, GO:0030096, GO:0032991, GO:0034357, GO:0042651, GO:0043226, GO:0043228, GO:0043229, GO:0043232, GO:0043234, GO:0044422, GO:0044424, GO:0044425, GO:0044436, GO:0044444, GO:0044459, GO:0044464, GO:0071944		M							SSF56925	SSF56925			146891.A9601_02491	photosystem II manganese-stabilizing			G3DSA:2.40.160.30	G3DSA:2.40.160.30				map00195, map01100	PF01716	Manganese-stabilising protein / photosystem II polypeptide									MTFNLSSQNFTATLIMRIRSFLAFVISICITFAFVPVKTFAFSERGNAQFTDVVNTGKANDCPTLDSSLVGSISLGNGDSLRGICMHPTEVYVKVPGTKRKAAEFVSTKIISPRNNTTVTEVYGDIDSGTFTEKGGIDFQLITVLTPGGLEVPFAFSAKDLTADLPSSIEPGTEVNGSTFTPNYRTGDFLDPKARAKNTGVEYAQGLVALGGDDEELAKENIKVDVNGTGVITLSINNVDSDTDEFAGTFEAIQPSDTDMGSKDPLDVKIIGELYGRKA
	8182	GC_00000935	Bin_1	JFNG01	411	DETECTED		GO:0000166, GO:0003674, GO:0003824, GO:0004632, GO:0004633, GO:0005488, GO:0005575, GO:0005623, GO:0005886, GO:0006139, GO:0006163, GO:0006164, GO:0006259, GO:0006725, GO:0006732, GO:0006753, GO:0006793, GO:0006796, GO:0006807, GO:0008150, GO:0008152, GO:0009058, GO:0009108, GO:0009116, GO:0009117, GO:0009119, GO:0009150, GO:0009152, GO:0009163, GO:0009165, GO:0009259, GO:0009260, GO:0009987, GO:…		H							SSF102645	SSF102645			146891.A9601_02501	Phosphopantothenoylcysteine decarboxylase			G3DSA:3.40.50.1950	G3DSA:3.40.50.1950	COG0452	Phosphopantothenoylcysteine synthetase/decarboxylase		map00770, map01100	PF04127	DNA / pantothenate metabolism flavoprotein			TIGR00521	coaBC_dfp: phosphopantothenoylcysteine decarboxylase / phosphopantothenate--cysteine ligase					MKTKSKDSKIKVLLLITGSIAAVRIPLLLSQLAKENYEIRCVLSKNAEKLIKPLSLSILSRNPCILENDQWSDGQSTPLHIELGNWADILIIAPLTATTLAKWVTGNAEGLIPSILIANIKPIIVAPAMNTQMWLNKAVQKNYKNLQNYENVLSLQPSEGLLACDAIGIGKIPPNDLIQLALEFIASHKQNEYRKDLLNKEILITGGCTSEKIDAARHITNKSSGAMGLLLSQVARFRGAQVKYVHGPLKIDKNLTDGIKRYEIETSVDLIRALNNEISNCDYFFMNAAVSDFKITSDTSAKIPKNQINAHLNQNFELVPDILKTISKSKKDNQVFVGFCAFTGSIEEARMTIKEKIIQKGCDYLFANPIDVEGQGFGFLAQNEGWLFDTNNMEHYINK…
	9345	GC_00000376	Bin_1	JFNG01	412	DETECTED				S																					PF10742	Protein of unknown function (DUF2555)									MKFISENKISEELVNSFDEEMTFELAKRLEEDNYNTPFDGLKDWHLLRALAINRPELTTNYTHLLDQEPFDEN
	5477	GC_00000370	Bin_1	JFNG01	413	DETECTED				S																															#NAME?
	3758	GC_00000451	Bin_1	JFNG01	414	DETECTED				S																					PF04483	Protein of unknown function (DUF565)									MVVKPQKTKFQLKIVENIQTLSIWANNPWRRYSISLITLLIGYFFGSSLGMVSAVVELMDPVAAFLSVVFIEFLIVLRRNFRFERKKKFLVLLLDSLRLGLFYGFFTESLKLL
	8970	GC_00001039	Bin_1	JFNG01	415	DETECTED		GO:0005575, GO:0005618, GO:0005622, GO:0005623, GO:0005737, GO:0005829, GO:0005886, GO:0008150, GO:0016020, GO:0030312, GO:0040007, GO:0044424, GO:0044444, GO:0044464, GO:0071944		F			PR00101	Aspartate carbamoyltransferase signature			SSF53671	SSF53671			146891.A9601_02541	aspartate transcarbamylase	MF_00001	Aspartate carbamoyltransferase [pyrB].	G3DSA:3.40.50.1370	G3DSA:3.40.50.1370	COG0540	Aspartate carbamoyltransferase, catalytic chain		map00240, map00250, map01100	PF02729	Aspartate/ornithine carbamoyltransferase, carbamoyl-P binding domain			TIGR00670	asp_carb_tr: aspartate carbamoyltransferase	PS00097	Aspartate and ornithine carbamoyltransferases signature.			MQIWPHKHIHTLANFSIKDYESVFELAKRFDALKNAGTKKIPALQGTLVTSLFFEASTRTKNSFELAAKRLSADVQTFAPSSSSLTKGETIIDTAITYSAMGADTLVIRHSSSYITFEIAKKLDAINAKTSVLNAGDGLHSHPSQGLLDIYTLIKFFSPKTLNPEVLNSKKILIIGDVNHSRVARSNLWALSAFGADIILCGPKKLIPDEFINFLKTPAPNQTEDPVKSRGSITISRSLEESIKIADAIIVLRLQKERMMENLLSSIDSYSLDYGLTPEKLSLNNKEIPILHPGPINRDIEISSSVVDRYPNCLINNQVANGIPIRMALLYLLQKHNK
	1004	GC_00001467	Bin_1	JFNG01	416	DETECTED				L							SSF50486	SSF50486			146891.A9601_02551	3-methyladenine DNA glycosylase			G3DSA:3.10.300.10	G3DSA:3.10.300.10	COG2094	3-methyladenine DNA glycosylase Mpg		map03410	PF02245	Methylpurine-DNA glycosylase (MPG)									MTKSNKSLFGKPGTFYIYKSYGIHHCLNIVTDKENFASGVLIRSVFISNKNERLASGPGLVTKTFNVDISFNSLEILNNKSLWISPRDSTLEEKDLIQTTRIGISKAKNIKWRWYLKNSRSVSKRLKGDRTPKFQ
	4154	GC_00000826	Bin_1	JFNG01	417	DETECTED		GO:0005575, GO:0005618, GO:0005623, GO:0030312, GO:0044464, GO:0071944		J							SSF141000	SSF141000			146891.A9601_02561	Allows the formation of correctly charged Asn-tRNA(Asn) or Gln-tRNA(Gln) through the transamidation of misacylated Asp- tRNA(Asn) or Glu-tRNA(Gln) in organisms which lack either or both of asparaginyl-tRNA or glutaminyl-tRNA synthetases. The reaction takes place in the presence of glutamine and ATP through an activated phospho-Asp-tRNA(Asn) or phospho-Glu-tRNA(Gln) (By similarity)	MF_00122	Aspartyl/glutamyl-tRNA(Asn/Gln) amidotransferase subunit C [gatC].			COG0721	Asp-tRNAAsn/Glu-tRNAGln amidotransferase C subunit		map00970, map01100	PF02686	Glu-tRNAGln amidotransferase C subunit			TIGR00135	gatC: aspartyl/glutamyl-tRNA(Asn/Gln) amidotransferase, C subunit			Coil	Coil	MTKITKDEVKKVAHLARLELNENEINNHAEQLEKILDYIRQLEKINTDDVPSTTRAIEVVNVFRKDEKKNSDCNEELLELGPSKEDKYFKVPRIINE
	898	GC_00000346	Bin_1	JFNG01	418	DETECTED				I											167546.P9301_02581	Beta-carotene hydroxylase					COG3239	Fatty acid desaturase		map00906, map01100, map01110	PF00487	Fatty acid desaturase									#NAME?
	5650	GC_00000516	Bin_1	JFNG01	419	DETECTED				S																															MNSFIFYLGTFYILVGTIFLTVPIIYLELGKPKDLIKAFLNLLIGLILIIKNKTLDESFFVTFLFFTVLVIFYLVEIFLSRWCQLTDNEKKKLRTFLEFKNNFLKILESINLVFGDFTKPSNLFNFGSNNKNTTQKKWVRND---KNDNIKI
	3799	GC_00000258	Bin_1	JFNG01	420	DETECTED		GO:0005575, GO:0005622, GO:0005623, GO:0005737, GO:0044424, GO:0044464		J			PR00984	Isoleucyl-tRNA synthetase signature			SSF52374	SSF52374			167546.P9301_02601	amino acids such as valine, to avoid such errors it has two additional distinct tRNA(Ile)-dependent editing activities. One activity is designated as 'pretransfer' editing and involves the hydrolysis of activated Val-AMP. The other activity is designated 'posttransfer' editing and involves deacylation of mischarged Val-tRNA(Ile) (By similarity)	MF_02002	Isoleucine--tRNA ligase [ileS].	G3DSA:3.40.50.620	G3DSA:3.40.50.620	COG0060	Isoleucyl-tRNA synthetase		map00970	PF00133	tRNA synthetases class I (I, L, M and V)			TIGR00392	ileS: isoleucine--tRNA ligase	PS00178	Aminoacyl-transfer RNA synthetases class-I signature.	Coil	Coil	MKSQNNKEQKSDFSYKETLNLLKTDFSMRANSVVREPEIQNFWANNDIDFKLGSKNSGEI-------------------------FTLHDGPPYANGALH------MGHALNKVLKDIINKYKTLRG---------FRVHFVPGWDCH-----GLPIELKVLQNLKSDERKNLDTL-----NLRKKATDYAHIQINNQKEGFKRWGIWGDWNNPYLTLKKSYESAQIGVFGKMFLNGYIYRGLKPVHWSPSSRTALAEAELEYPDGHYSKSIYVSLKITKIPEEILLNFIQENLNIKKDYFFNNSFITIWTTTPWTIPANEAVAVNPKINYVFAIDEEKKIYLFAEDLSSEISKKLNKDFKVLLEVIGSKLENIEYQHPSKNKNCRIVIGGDYITTESG…
	6727	GC_00000706	Bin_1	JFNG01	421	DETECTED				S																															MEETPASQKMAKIDLINSLEKLSSEIPDRILKLEGFILKENQKEKLEILIFRGYSSSTTHPIEIDSEKKVITFSYRITNFKLYKSPLTETEENFIRENQNSVFFLNQKNWI
	6786	GC_00001080	Bin_1	JFNG01	422	DETECTED				S																					PF11375	Protein of unknown function (DUF3177)									MNVFNQLSIWLSFQLSIIFLIGIPVTLSFWSIKKRNKAVIKLLSIYWKVSLLFFISLLLLIGKFNYALAITNISTLLMTVSVWFWNDINDELREYDFSYSLTTTTKIWRWTITFISLNFFIQSLQNFNCFSFINSNACAIWLQPSSDLYITIKNLFNFFFGANFTQPISKFLGLFSLLIYILGLIQWSIIKLPKNGRNSCFSENGKN
	5238	GC_00000434	Bin_1	JFNG01	423	DETECTED				S					PS51625	SAM-dependent methyltransferase TRMB-type domain profile.	SSF53335	SSF53335			167546.P9301_02631	Catalyzes the formation of N(7)-methylguanine at position 46 (m7G46) in tRNA (By similarity)	MF_01057	tRNA (guanine-N(7)-)-methyltransferase [trmB].	G3DSA:3.40.50.150	G3DSA:3.40.50.150	COG0220	tRNA G46 methylase TrmB			PF02390	Putative methyltransferase			TIGR00091	TIGR00091: tRNA (guanine-N(7)-)-methyltransferase					MRQHVNPLSSNFNQIERIPSLSEMFDDSKSNLHLDIGCAAGEFLFDLALLNTSWNYLGIEIREKLVKNAKLKVIEREIKNLYFIFGNANNILNDVQNKFIIKNLKSISFNFPDPWFKKRHYKRRVIQPGFINMLSDSLQKGTLIFIKTDVKDLFDYMDWTISSNFHFKTIDKKDFNCSESFNPIKVKTNREKYVIVNQLDIYEKIYIKI
	4103	GC_00001215	Bin_1	JFNG01	424	DETECTED		GO:0003674, GO:0003824, GO:0005575, GO:0005622, GO:0005623, GO:0005737, GO:0005829, GO:0006040, GO:0006047, GO:0006048, GO:0006139, GO:0006464, GO:0006468, GO:0006725, GO:0006753, GO:0006793, GO:0006796, GO:0006807, GO:0008150, GO:0008152, GO:0008966, GO:0009058, GO:0009117, GO:0009165, GO:0009225, GO:0009226, GO:0009987, GO:0016310, GO:0016853, GO:0016866, GO:0016868, GO:0018130, GO:0019438, GO:…		G			PR00509	Phosphoglucomutase/phosphomannomutase family signature			SSF53738	SSF53738			167546.P9301_02641	Catalyzes the conversion of glucosamine-6-phosphate to glucosamine-1-phosphate (By similarity)	MF_01554_B	Phosphoglucosamine mutase [glmM].	G3DSA:3.40.120.10	G3DSA:3.40.120.10	COG1109	Phosphomannomutase		map00520, map01100	PF02878	Phosphoglucomutase/phosphomannomutase, alpha/beta/alpha domain I			TIGR01455	glmM: phosphoglucosamine mutase	PS00710	Phosphoglucomutase and phosphomannomutase phosphoserine signature.			MQSIFGTDGIRGRYNKEITYSLAYKVGYALGSTLENKNPILIGRDTRISGDILLQAITQGIYESGTKFINLGICPTPAIPFLIKQENLSSGVMISASHNPPEYNGIKIFDHNGQKITKNFESNIQKIIEESKQNISIPTKVVSLNTNKNLMDIYIKSLIQTMGGESLSGLRIILDTCYGSATTCAKKIFQSLGADVKVINNSKNGLKINLNCGSTNLEPLKKTLRESPADMGFSFDGDADRVIGIDSEGNVLDGDHILFLWGRELMEQKILTNNLLVSTQMANLGFEKSWNKIGGILHRTDVGDKYVHDAIKKQRAVLGGEQSGHILSKINNFSGDGILTALQISKYCKKKNINLNDWLKSSFEPFPQKLTNIKLDFNINKLNPKNKILIDESIKNFQE…
	444	GC_00000821	Bin_1	JFNG01	425	DETECTED		GO:0005575, GO:0005623, GO:0005886, GO:0016020, GO:0044464, GO:0071944		O					PS51352	Thioredoxin domain profile.	SSF52833	SSF52833			93060.P9215_02651	thioredoxin-like protein txlA			G3DSA:3.40.30.10	G3DSA:3.40.30.10					PF00085	Thioredoxin									MFNLFKITLVSVTLIVQSESREPILKTNLKIMLVLIISIVIISMLLFKNLFFKSTYLLKSFGELSVDPEIAFTNNKPTFLEFYAEWCEVCKEMAPQVSAFKDEYEKDINFVFLNVDNQKWSNYIQKFAVNGIPQVNLFDKKGNLISTFIGKQDEMKIRKSINNLEKEEKPYEEIINAEFSTIQENKNYEVNPRSHG
	162	GC_00000335	Bin_1	JFNG01	426	DETECTED				F					PS51331	Flavin-dependent thymidylate synthase (thyX) domain profile.	SSF69796	SSF69796			517418.Ctha_1238	FAD-dependent thymidylate synthase					COG1351	Thymidylate synthase ThyX		map00240, map00670	PF02511	Thymidylate synthase complementing protein			TIGR02170	thyX: thymidylate synthase, flavin-dependent					MSKVELISLTPDAEKTMAYIARVSNPKNQENEDYSKLLSYCIKNEHWSVFEQSFMTLQIETNRGIAAQILRHRSFTFQEFSQRYADSTQLGNIPLPELRRQDFKNRQNSIPDLPDELKKRFNEKIGLHFQAASELYEDLLAEGVAKECARFVLPLATPTRIYMSGSCRSWIHYIHLRSAHGTQKEHKSIAQNCKSIFKKSFPIVSKSLEW
	8616	GC_00000393	Bin_1	JFNG01	427	DETECTED				F							SSF51283	SSF51283			167546.P9301_02671	Deoxycytidine triphosphate deaminase			G3DSA:2.70.40.10	G3DSA:2.70.40.10	COG0717	Deoxycytidine triphosphate deaminase		map00240, map01100	PF00692	dUTPase			TIGR02274	dCTP_deam: deoxycytidine triphosphate deaminase					MLKNDLWINQKASEGMIKPFQSNLVRHLEPNNKQKPVLSYGCSSYGYDLRLSSKEFLIFRHIPGTVMNPKKFNPNNLEKTILHHDDDGDFFILPAHSYGLGVALEKMKVPENITVICIGKSTYARLGIIVNTTPAEAGWEGHLTLEFSNSSGADCRIYAEEGICQLLFFEGDPCSTTYEDRRGKYQNQPEKVTLAKI
	1628	GC_00000624	Bin_1	JFNG01	428	DETECTED				H	PIRSF015617	PIRSF015617					SSF52540	SSF52540			146891.A9601_02671	Cob(I)alamin adenosyltransferase			G3DSA:3.40.50.300	G3DSA:3.40.50.300	COG2109	ATP:corrinoid adenosyltransferase		map00860, map01100	PF02572	ATP:corrinoid adenosyltransferase BtuR/CobO/CobP									MVISSSHIYSKRNLDVVKTNPAKKINVKNFSQNGQIQIYQSSYRGSYTSVIRDSLRNAALGRKVLLIQFMKGGVNQGVDHAVKLCGNLTWVRSSHSFDQYNSEAIENNKNLKKSIHESTTELWNFCKRELQSGENDQIILDEIFLAIDMRIIDKDDLISTLENRFISGDVILTGTDIPKDLLLMANQITELRS
	2407	GC_00000616	Bin_1	JFNG01	429	DETECTED				T			PR00034	CRP bacterial regulatory protein HTH signature	PS50042	cAMP/cGMP binding motif profile.	SSF51206	SSF51206			146891.A9601_02681	Transcriptional regulator, Crp Fnr family			G3DSA:1.10.10.10	G3DSA:1.10.10.10					PF13545	Crp-like helix-turn-helix domain	SM00419	helix_turn_helix, cAMP Regulatory protein	TIGR03697	NtcA_cyano: global nitrogen regulator NtcA	PS00042	Crp-type HTH domain signature.			MIPASRGFNRFSSQHSGQSKINSVGERFPINRTLMEVIKGLDGASTEMVERSKTIFFPGDPAERVYLIRRGAVRLSRVYESGEEITVALLRENSLFGVLSLLTGHRSDRFYHSIAFTRVEMITAPANSVLRAIEEDASVGLLLLQGLSSRILQTETMIETLTHRDMSSRLVSFLMVLCRDFGVAGEKGITIDLRLSHQAIAEAIGSTRVTITRLLGDLKDSGLLNIERKKITVFDPIALAKRFN
	6001	GC_00000641	Bin_1	JFNG01	430	DETECTED		GO:0005575, GO:0016020		S											146891.A9601_02691	protein with myosin-like					COG4372	Uncharacterized conserved protein, contains DUF3084 domain			PF11283	Protein of unknown function (DUF3084)							Coil	Coil	MAWILIVFLILLGGLIAPFGDILGTKIGKARFSILKLRPKKTATIITIITGGFISSISIGLLILVSEEFRQRLFVDIPFLQKTLDESKKALIPLQEEQEELEGKIIQKEKELNQLKNNIKEFRRGNVVIKRGQTLFIAEINSNSNVKRDFPKIYNEADKFVRKIVTPTNKEAKNILLWRPSDISKIQTIASNGGNWILLIKSATNVLKGDNYVFVSPDLLENKLIVKKGDLITSSILGESDLNLKSIDLQIKSMLRETRDKIKSKGSQVTEIKTNGNFIKKIRDFLQENQNIKFKLEVVSLRDSKTVEPIVVEINILKIAS
	3453	GC_00000352	Bin_1	JFNG01	431	DETECTED		GO:0005575, GO:0005622, GO:0005623, GO:0005737, GO:0044424, GO:0044464		S							SSF53098	SSF53098			167546.P9301_02711	Could be a nuclease that resolves Holliday junction intermediates in genetic recombination (By similarity)			G3DSA:3.30.420.140	G3DSA:3.30.420.140							SM00732	Likely ribonuclease with RNase H fold.							MPRVITIDPGKSKCGLVIAEISEKKVYKAIILKSELLENYVRHLIAAEDISQIIIGNGTTSKEIKEKLIFFKKEIITFEEKNTTFRAKARYFELFPISGLKFLVPREVFILNKNLDAISALIILEDYCKTKFTLNQNIDFKTWLK
	7139	GC_00000629	Bin_1	JFNG01	432	DETECTED				S																					PF11344	Protein of unknown function (DUF3146)									MRSKPETIANVSVKEYCFSKKQIQGVVEASQFKWTFTYSFNKGLLKVNPPLGRALIENALLKFLLKKDYELETGNEYKFTISAKF
	6916	GC_00000465	Bin_1	JFNG01	433	DETECTED		GO:0003674, GO:0003824, GO:0004045, GO:0005575, GO:0005622, GO:0005623, GO:0005737, GO:0005886, GO:0008150, GO:0008152, GO:0016020, GO:0016787, GO:0016788, GO:0040007, GO:0044424, GO:0044464, GO:0052689, GO:0071944		J							SSF53178	SSF53178			146891.A9601_02721	The natural substrate for this enzyme may be peptidyl- tRNAs which drop off the ribosome during protein synthesis (By similarity)	MF_00083	Peptidyl-tRNA hydrolase [pth].	G3DSA:3.40.50.1470	G3DSA:3.40.50.1470	COG0193	Peptidyl-tRNA hydrolase			PF01195	Peptidyl-tRNA hydrolase			TIGR00447	pth: aminoacyl-tRNA hydrolase	PS01196	Peptidyl-tRNA hydrolase signature 2.			MKEIFLIGLGNPGKKYSKSRHNIGFLLLENFSKKYNSNFLLKDKLKSSCSEFQINDSNFRLFLPNTFMNNSGDAVRAIVDWYKINLDQIFIIVDDKDLPLGKIRFRRKGSSGGHNGLKSIIEQLQTQNFKRIRIGIGSPPLIKGKNNINTISHVLGNISLEEKSILDKVYKRVIESLEKLNTKKEEYIINELNSFDKDQP
	3826	GC_00001243	Bin_1	JFNG01	434	DETECTED		GO:0005575, GO:0005622, GO:0005623, GO:0005737, GO:0005886, GO:0009521, GO:0009523, GO:0009579, GO:0016020, GO:0030075, GO:0030096, GO:0032991, GO:0034357, GO:0042651, GO:0043226, GO:0043228, GO:0043229, GO:0043232, GO:0043234, GO:0044422, GO:0044424, GO:0044425, GO:0044436, GO:0044444, GO:0044459, GO:0044464, GO:0071944		C							SSF161025	SSF161025	PD003584	PHOTOSYSTEM II PHOSPHOPROTEIN CHLOROPLAST PHOTOSYNTHESIS H MEMBRANE CENTER REACTION PSII-H	146891.A9601_02731	photosystem II reaction center protein H	MF_00752	Photosystem II reaction center protein H [psbH].	G3DSA:1.20.5.880	G3DSA:1.20.5.880				map00195, map01100	PF00737	Photosystem II 10 kDa phosphoprotein									MGQKTALGSLLKAIGNSGQGKVVPGWGAVPVMTVIGLLLLVFLVILLQIYNQSLLLQGFSVDWNGN
[truncated: 9,087 more rows]
